# Supplementary material for: A Paal–Knorr agent for chemoproteomic profiling of targets of isoketals in cells
Source: Chem Sci. 2021 Oct 15;12(43):14557–63. doi: 10.1039/d1sc02230j (PMC8580055; doi:10.1039/d1sc02230j)
Supplement: SC-012-D1SC02230J-s002 [file SC-012-D1SC02230J-s002.xlsx]

## Sheet: pChem result of ONAyne
Rank	Mass Shift	Isotopic Label	Peptide Total	PSM Total	Peptide L|H	PSM L|H	Top1 Site	Top1 Probability	Accurate Mass	Site (Location /Probability)-Others	Neutral Loss
1	PFIND_DELTA_285	Yes	1475	2623	777|698	1367|1256	K	0.76	285.147653|291.167962(29 ppm)	A(0.061); G(0.037); N-SIDE(0.027); E(0.02); S(0.017); H(0.015); L(0.015); P(0.013); D(0.013); V(0.01); F(0.009); N(0.009); I(0.007); T(0.007); Q(0.006); M(0.001);
2	PFIND_DELTA_301	Yes	1716	2596	839|877	1231|1365	K	0.83	301.14206|307.161514(112 ppm)	N-SIDE(0.094); A(0.041); G(0.022); L(0.014); M(0.011); H(0.011); T(0.01); S(0.009); Q(0.008); E(0.008); D(0.007); P(0.007); V(0.006); N(0.006); I(0.003); F(0.003); Y(0.002); C(0.001);
3	PFIND_DELTA_287	Yes	686	1467	339|347	744|723	K	0.891	287.1272|293.14729(6 ppm)	N-SIDE(0.13); A(0.024); G(0.019); V(0.011); E(0.011); L(0.009); P(0.008); H(0.005); Q(0.005); D(0.004); F(0.004); S(0.003); N(0.003); T(0.001); C-SIDE(0.001); M(0.001);
4	PFIND_DELTA_305	Yes	805	1388	390|415	701|687	K	0.582	305.138176|311.158102(34 ppm)	N-SIDE(0.257); A(0.146); T(0.05); G(0.033); L(0.026); E(0.026); S(0.026); Q(0.021); H(0.017); P(0.014); I(0.014); V(0.011); D(0.01); N(0.009); F(0.007); M(0.004); Y(0.003); W(0.001);	433.225494, 287.135889 |439.246455, 293.151884
5	PFIND_DELTA_289	Yes	116	471	67|49	254|217	K	0.764	289.142916|295.162883(27 ppm)	A(0.138); L(0.028); T(0.024); G(0.024); H(0.008); Q(0.008); N-SIDE(0.008); D(0.004); P(0.004);
