# Supplementary material for: A Paal–Knorr agent for chemoproteomic profiling of targets of isoketals in cells
Source: Chem Sci. 2021 Oct 15;12(43):14557–63. doi: 10.1039/d1sc02230j (PMC8580055; doi:10.1039/d1sc02230j)
Supplement: SC-012-D1SC02230J-s003 [file SC-012-D1SC02230J-s003.xlsx]

## Sheet: ONA_200μM_200μM_6modi
Identifier	Genename	Modified sequences	Description	△273	△289	△305	△287	△285	△301	ONAyne_200μM_200μM (in situ)
A2A5R2_K1651	Arfgef2	AGFK*GK	BIG2_MOUSE Brefeldin A-inhibited guanine nucleotide-exchange protein 2 OS=Mus musculus OX=10090 GN=Arfgef2 PE=1 SV=1	0	0	0	0	4	0	1.10383
A2AGT5_K1607	Ckap5	LDK*DEIIK	CKAP5_MOUSE Cytoskeleton-associated protein 5 OS=Mus musculus OX=10090 GN=Ckap5 PE=1 SV=1	0	0	0	0	0	1	1.07527
A2AGT5_K550	Ckap5	TPTAK*AGGPSK	CKAP5_MOUSE Cytoskeleton-associated protein 5 OS=Mus musculus OX=10090 GN=Ckap5 PE=1 SV=1	0	0	0	0	1	0	0.89286
A2AIW0_K307	Entr1	LEAK*MIK	ENTR1_MOUSE Endosome-associated-trafficking regulator 1 OS=Mus musculus OX=10090 GN=Entr1 PE=1 SV=1	0	0	0	0	0	1	0.91743
A2AKQ0_K212	Slc35d1	LDSK*ELGK	S35D1_MOUSE UDP-glucuronic acid/UDP-N-acetylgalactosamine transporter OS=Mus musculus OX=10090 GN=Slc35d1 PE=2 SV=2	0	0	0	1	0	0	1.19048
A2AL36_K2084	Cntrl	ALK*LQR	CNTRL_MOUSE Centriolin OS=Mus musculus OX=10090 GN=Cntrl PE=1 SV=2	0	0	0	1	0	0	1.36986
A2AR02_K648	Ppig	SQESK*SSHR	PPIG_MOUSE Peptidyl-prolyl cis-trans isomerase G OS=Mus musculus OX=10090 GN=Ppig PE=1 SV=1	0	0	0	0	1	1	1.11903
A2ASS6_K472	Ttn	KEAEK*TAVTK	TITIN_MOUSE Titin OS=Mus musculus OX=10090 GN=Ttn PE=1 SV=1	0	0	0	1	0	0	1.35135
A2ASS6_K484	Ttn	VVVAADK*AK	TITIN_MOUSE Titin OS=Mus musculus OX=10090 GN=Ttn PE=1 SV=1	0	1	0	0	0	0	0.74074
A2RSJ4_K682	Uhrf1bp1l	LNK*NTLK	UH1BL_MOUSE UHRF1-binding protein 1-like OS=Mus musculus OX=10090 GN=Uhrf1bp1l PE=1 SV=2	0	0	0	0	0	1	1.05263
A2RSY6_K210	Trmt1l	GETK*SR	TRM1L_MOUSE TRMT1-like protein OS=Mus musculus OX=10090 GN=Trmt1l PE=1 SV=1	0	0	0	1	0	0	1.05263
A6H5X4_K267	Phf11	FQEVIK*SK	PHF11_MOUSE PHD finger protein 11 OS=Mus musculus OX=10090 GN=Phf11 PE=2 SV=1	0	0	0	0	0	1	1.14943
A6H611_K124	Mipep	VADLADFVK*IGHPDPAFR	MIPEP_MOUSE Mitochondrial intermediate peptidase OS=Mus musculus OX=10090 GN=Mipep PE=1 SV=1	0	0	0	0	3	1	0.922322
A6H6A4_K307	Lrriq4	LEK*VPR	LRIQ4_MOUSE Leucine-rich repeat and IQ domain-containing protein 4 OS=Mus musculus OX=10090 GN=Lrriq4 PE=2 SV=1	0	0	0	0	0	1	0.79365
B1AQJ2_K6	Usp36	PIVDK*LK	UBP36_MOUSE Ubiquitin carboxyl-terminal hydrolase 36 OS=Mus musculus OX=10090 GN=Usp36 PE=1 SV=1	0	0	0	0	0	4	1.03183
B2RQC6_K1657	Cad	LGPGK*GEVRPELGSR	PYR1_MOUSE CAD protein OS=Mus musculus OX=10090 GN=Cad PE=1 SV=1	0	0	0	3	0	6	1.0707
B2RQC6_K754	Cad	VSTK*IGSCMK	PYR1_MOUSE CAD protein OS=Mus musculus OX=10090 GN=Cad PE=1 SV=1	0	0	0	0	1	0	0.86957
B2RY56_K160	Rbm25	LLVK*VDAK	RBM25_MOUSE RNA-binding protein 25 OS=Mus musculus OX=10090 GN=Rbm25 PE=1 SV=2	0	0	0	0	0	3	1.26278
B2RY56_K69	Rbm25	K*DHPGLK	RBM25_MOUSE RNA-binding protein 25 OS=Mus musculus OX=10090 GN=Rbm25 PE=1 SV=2	0	0	0	0	1	0	1.19048
D3YXK2_K458	Safb	VVGAK*VVTNAR	SAFB1_MOUSE Scaffold attachment factor B1 OS=Mus musculus OX=10090 GN=Safb PE=1 SV=2	0	0	0	0	2	1	1.14492
D3YXK2_K505	Safb	AK*SEPTGK	SAFB1_MOUSE Scaffold attachment factor B1 OS=Mus musculus OX=10090 GN=Safb PE=1 SV=2	0	0	0	2	0	0	0.836955
E9PVA8_K167	Gcn1	DGAVK*K	GCN1_MOUSE eIF-2-alpha kinase activator GCN1 OS=Mus musculus OX=10090 GN=Gcn1 PE=1 SV=1	0	0	0	0	1	0	0.9434
E9PVX6_K1034	Mki67	EESSALTK*R	KI67_MOUSE Proliferation marker protein Ki-67 OS=Mus musculus OX=10090 GN=Mki67 PE=1 SV=1	0	0	0	0	0	1	1.38889
E9PVX6_K1696	Mki67	YCSDPLIGNK*QTR	KI67_MOUSE Proliferation marker protein Ki-67 OS=Mus musculus OX=10090 GN=Mki67 PE=1 SV=1	0	0	0	0	0	2	1.23476
E9PVX6_K610	Mki67	LGVK*QTQTK	KI67_MOUSE Proliferation marker protein Ki-67 OS=Mus musculus OX=10090 GN=Mki67 PE=1 SV=1	0	0	0	0	2	0	1.04278
E9PXF8_K1842	Sbf2	DIK*TSK	MTMRD_MOUSE Myotubularin-related protein 13 OS=Mus musculus OX=10090 GN=Sbf2 PE=1 SV=1	0	0	0	0	3	1	0.966207
E9PYH6_K149	Setd1a	GAK*ETVK	SET1A_MOUSE Histone-lysine N-methyltransferase SETD1A OS=Mus musculus OX=10090 GN=Setd1a PE=1 SV=1	0	0	0	0	0	1	1.08696
E9Q2M9_K3166	Wdfy4	NQSK*LLVGDEK	WDFY4_MOUSE WD repeat- and FYVE domain-containing protein 4 OS=Mus musculus OX=10090 GN=Wdfy4 PE=1 SV=2	0	0	0	0	0	1	1.33333
E9Q555_K2888	Rnf213	LVQDK*IR	RN213_MOUSE E3 ubiquitin-protein ligase RNF213 OS=Mus musculus OX=10090 GN=Rnf213 PE=1 SV=2	0	0	0	0	2	4	1.11343
E9Q555_K4915	Rnf213	FLQGK*PR	RN213_MOUSE E3 ubiquitin-protein ligase RNF213 OS=Mus musculus OX=10090 GN=Rnf213 PE=1 SV=2	0	0	0	0	1	0	0.76923
E9Q5C9_K107	Nolc1	AQGLPTQK*AAAQVK	NOLC1_MOUSE Nucleolar and coiled-body phosphoprotein 1 OS=Mus musculus OX=10090 GN=Nolc1 PE=1 SV=1	0	0	1	0	0	0	1.0101
E9Q5C9_K123	Nolc1	ASVPQHAGK*AAAK	NOLC1_MOUSE Nucleolar and coiled-body phosphoprotein 1 OS=Mus musculus OX=10090 GN=Nolc1 PE=1 SV=1	0	0	0	1	1	0	0.98124
E9Q5C9_K201	Nolc1	AAVAAK*AQTK	NOLC1_MOUSE Nucleolar and coiled-body phosphoprotein 1 OS=Mus musculus OX=10090 GN=Nolc1 PE=1 SV=1	0	0	0	1	0	0	1.02083
E9Q5C9_K215	Nolc1	AEAKPGTPAK*AQPK	NOLC1_MOUSE Nucleolar and coiled-body phosphoprotein 1 OS=Mus musculus OX=10090 GN=Nolc1 PE=1 SV=1	0	0	0	1	0	0	1.0101
E9Q5C9_K260	Nolc1	QVVAK*APVK	NOLC1_MOUSE Nucleolar and coiled-body phosphoprotein 1 OS=Mus musculus OX=10090 GN=Nolc1 PE=1 SV=1	0	0	0	0	0	1	0.97087
E9Q5C9_K33	Nolc1	DSQLSEVASK*FAK	NOLC1_MOUSE Nucleolar and coiled-body phosphoprotein 1 OS=Mus musculus OX=10090 GN=Nolc1 PE=1 SV=1	0	0	0	0	0	1	0.76923
E9Q5C9_K356	Nolc1	TVVSK*TPAK	NOLC1_MOUSE Nucleolar and coiled-body phosphoprotein 1 OS=Mus musculus OX=10090 GN=Nolc1 PE=1 SV=1	0	0	0	1	1	0	0.906595
E9Q5C9_K360	Nolc1	TPAK*AAPVK	NOLC1_MOUSE Nucleolar and coiled-body phosphoprotein 1 OS=Mus musculus OX=10090 GN=Nolc1 PE=1 SV=1	0	0	0	0	0	1	1.38889
E9Q5C9_K402	Nolc1	PAVTPK*PSAAK	NOLC1_MOUSE Nucleolar and coiled-body phosphoprotein 1 OS=Mus musculus OX=10090 GN=Nolc1 PE=1 SV=1	0	0	0	0	0	2	1.01541
E9Q5C9_K407	Nolc1	PSAAK*AVTTPK	NOLC1_MOUSE Nucleolar and coiled-body phosphoprotein 1 OS=Mus musculus OX=10090 GN=Nolc1 PE=1 SV=1	0	0	3	0	0	2	1.09436
E9Q5C9_K459	Nolc1	VTAK*AAPAK	NOLC1_MOUSE Nucleolar and coiled-body phosphoprotein 1 OS=Mus musculus OX=10090 GN=Nolc1 PE=1 SV=1	0	0	0	0	0	2	1.173
E9Q5C9_K509	Nolc1	AAGGAVSTPAPGK*K	NOLC1_MOUSE Nucleolar and coiled-body phosphoprotein 1 OS=Mus musculus OX=10090 GN=Nolc1 PE=1 SV=1	0	0	0	1	0	0	0.92593
E9Q5F9_K354	Setd2	K*SSAPSK	SETD2_MOUSE Histone-lysine N-methyltransferase SETD2 OS=Mus musculus OX=10090 GN=Setd2 PE=1 SV=1	0	1	0	0	0	0	0.79365
E9Q7G0_K1553	Numa1	VQQQK*LK	NUMA1_MOUSE Nuclear mitotic apparatus protein 1 OS=Mus musculus OX=10090 GN=Numa1 PE=1 SV=1	0	0	0	0	1	0	0.9009
E9Q7G0_K1917	Numa1	VCPPHLK*TCYPLESR	NUMA1_MOUSE Nuclear mitotic apparatus protein 1 OS=Mus musculus OX=10090 GN=Numa1 PE=1 SV=1	0	0	0	0	4	1	1.06936
E9Q7G0_K2006	Numa1	K*QSSTADTQK	NUMA1_MOUSE Nuclear mitotic apparatus protein 1 OS=Mus musculus OX=10090 GN=Numa1 PE=1 SV=1	0	0	2	0	0	0	0.73073
E9Q7G0_K377	Numa1	CLEEK*NEILQGK	NUMA1_MOUSE Nuclear mitotic apparatus protein 1 OS=Mus musculus OX=10090 GN=Numa1 PE=1 SV=1	0	0	0	0	3	0	1.25188
E9Q7G0_K443	Numa1	GK*QEAQLLAER	NUMA1_MOUSE Nuclear mitotic apparatus protein 1 OS=Mus musculus OX=10090 GN=Numa1 PE=1 SV=1	0	0	3	3	0	5	1.03829
E9Q7G0_K724	Numa1	AADALK*EQQCR	NUMA1_MOUSE Nuclear mitotic apparatus protein 1 OS=Mus musculus OX=10090 GN=Numa1 PE=1 SV=1	0	0	0	0	2	4	0.929205
E9Q9A9_K598	Oas2	PK*ASLPPK	OAS2_MOUSE 2'-5'-oligoadenylate synthase 2 OS=Mus musculus OX=10090 GN=Oas2 PE=1 SV=1	0	0	0	1	0	0	1.11111
F6ZDS4_K1501	Tpr	IIDIQEK*VK	TPR_MOUSE Nucleoprotein TPR OS=Mus musculus OX=10090 GN=Tpr PE=1 SV=1	0	0	0	0	0	1	0.9434
F6ZDS4_K389	Tpr	LLK*EAGEANK	TPR_MOUSE Nucleoprotein TPR OS=Mus musculus OX=10090 GN=Tpr PE=1 SV=1	0	0	0	0	0	1	0.72993
F6ZDS4_K507	Tpr	EVEAK*APILK	TPR_MOUSE Nucleoprotein TPR OS=Mus musculus OX=10090 GN=Tpr PE=1 SV=1	0	0	0	0	2	1	0.996053
F6ZDS4_K928	Tpr	K*LENEVEQR	TPR_MOUSE Nucleoprotein TPR OS=Mus musculus OX=10090 GN=Tpr PE=1 SV=1	0	0	2	1	0	4	1.07954
G5E870_K1458	Trip12	AQTAPTK*TSPR	TRIPC_MOUSE E3 ubiquitin-protein ligase TRIP12 OS=Mus musculus OX=10090 GN=Trip12 PE=1 SV=1	0	0	0	1	0	0	0.89286
O08539_K32	Bin1	VLQK*LGK	BIN1_MOUSE Myc box-dependent-interacting protein 1 OS=Mus musculus OX=10090 GN=Bin1 PE=1 SV=1	0	0	0	0	0	2	0.868525
O08547_K38	Sec22b	DLQQYQSQAK*QLFR	SC22B_MOUSE Vesicle-trafficking protein SEC22b OS=Mus musculus OX=10090 GN=Sec22b PE=1 SV=3	0	0	3	3	0	1	0.944254
O08709_K209	Prdx6	GVFTK*ELPSGK	PRDX6_MOUSE Peroxiredoxin-6 OS=Mus musculus OX=10090 GN=Prdx6 PE=1 SV=3	0	0	5	6	6	4	1.02201
O08709_K63	Prdx6	LAPEFAK*R	PRDX6_MOUSE Peroxiredoxin-6 OS=Mus musculus OX=10090 GN=Prdx6 PE=1 SV=3	0	0	0	0	0	1	1.03093
O08739_K347	Ampd3	TVAEK*LGR	AMPD3_MOUSE AMP deaminase 3 OS=Mus musculus OX=10090 GN=Ampd3 PE=1 SV=2	0	0	0	0	3	2	1.09508
O08749_K273	Dld	FK*LNTK	DLDH_MOUSE Dihydrolipoyl dehydrogenase, mitochondrial OS=Mus musculus OX=10090 GN=Dld PE=1 SV=2	0	0	0	0	0	1	0.96154
O08749_K430	Dld	AK*TNADTDGMVK	DLDH_MOUSE Dihydrolipoyl dehydrogenase, mitochondrial OS=Mus musculus OX=10090 GN=Dld PE=1 SV=2	0	0	0	0	0	1	1.03093
O08784_K1107	Tcof1	K*EASSGSTPQKPK	TCOF_MOUSE Treacle protein OS=Mus musculus OX=10090 GN=Tcof1 PE=1 SV=1	0	0	1	0	0	0	1.17647
O08784_K468	Tcof1	GANLPCPGK*VGSAALR	TCOF_MOUSE Treacle protein OS=Mus musculus OX=10090 GN=Tcof1 PE=1 SV=1	0	0	0	0	0	2	1.0531
O08784_K504	Tcof1	AK*ASLALPQK	TCOF_MOUSE Treacle protein OS=Mus musculus OX=10090 GN=Tcof1 PE=1 SV=1	0	0	0	0	0	2	1.04167
O08788_K1154	Dctn1	K*TSQLLEK	DCTN1_MOUSE Dynactin subunit 1 OS=Mus musculus OX=10090 GN=Dctn1 PE=1 SV=3	0	0	0	1	0	0	1.04167
O08795_K429	Prkcsh	LVSQK*PK	GLU2B_MOUSE Glucosidase 2 subunit beta OS=Mus musculus OX=10090 GN=Prkcsh PE=1 SV=1	0	0	0	0	1	0	1.20482
O08915_K112	Aip	NIAEGK*DPLEGQR	AIP_MOUSE AH receptor-interacting protein OS=Mus musculus OX=10090 GN=Aip PE=1 SV=1	0	0	0	0	0	1	0.93458
O08915_K196	Aip	EGQVK*EAAAK	AIP_MOUSE AH receptor-interacting protein OS=Mus musculus OX=10090 GN=Aip PE=1 SV=1	0	0	0	0	0	2	1.10145
O08992_K110	Sdcbp	AEIK*QGIR	SDCB1_MOUSE Syntenin-1 OS=Mus musculus OX=10090 GN=Sdcbp PE=1 SV=1	0	0	0	0	0	4	0.970598
O09106_K412	Hdac1	ISICSSDK*R	HDAC1_MOUSE Histone deacetylase 1 OS=Mus musculus OX=10090 GN=Hdac1 PE=1 SV=1	0	0	0	3	4	6	1.01775
O09106_K438	Hdac1	NSSNFK*K	HDAC1_MOUSE Histone deacetylase 1 OS=Mus musculus OX=10090 GN=Hdac1 PE=1 SV=1	0	0	0	1	0	0	1.08696
O09167_K115	Rpl21	VKENDQK*K	RL21_MOUSE 60S ribosomal protein L21 OS=Mus musculus OX=10090 GN=Rpl21 PE=1 SV=3	0	0	0	0	1	0	0.9901
O35129_K216	Phb2	AQFLVEK*AK	PHB2_MOUSE Prohibitin-2 OS=Mus musculus OX=10090 GN=Phb2 PE=1 SV=1	0	0	0	6	1	2	1.04025
O35129_K218	Phb2	AK*QEQR	PHB2_MOUSE Prohibitin-2 OS=Mus musculus OX=10090 GN=Phb2 PE=1 SV=1	0	0	0	1	0	0	0.72993
O35143_K103	Atp5if1	IQQLK*NNH	ATIF1_MOUSE ATPase inhibitor, mitochondrial OS=Mus musculus OX=10090 GN=Atp5if1 PE=1 SV=2	0	0	0	1	6	3	0.991685
O35143_K49	Atp5if1	AGGAFGK*R	ATIF1_MOUSE ATPase inhibitor, mitochondrial OS=Mus musculus OX=10090 GN=Atp5if1 PE=1 SV=2	0	0	0	1	2	6	1.12744
O35143_K64	Atp5if1	TK*EQLAALR	ATIF1_MOUSE ATPase inhibitor, mitochondrial OS=Mus musculus OX=10090 GN=Atp5if1 PE=1 SV=2	0	0	6	5	1	5	1.05372
O35143_K90	Atp5if1	LQK*QIER	ATIF1_MOUSE ATPase inhibitor, mitochondrial OS=Mus musculus OX=10090 GN=Atp5if1 PE=1 SV=2	0	0	0	5	0	3	0.96626
O35218_K298	Cpsf2	CFEDK*R	CPSF2_MOUSE Cleavage and polyadenylation specificity factor subunit 2 OS=Mus musculus OX=10090 GN=Cpsf2 PE=1 SV=1	0	0	0	0	3	0	1.04705
O35286_K143	Dhx15	LQLPVWEYK*DR	DHX15_MOUSE Pre-mRNA-splicing factor ATP-dependent RNA helicase DHX15 OS=Mus musculus OX=10090 GN=Dhx15 PE=1 SV=2	0	0	0	0	1	0	0.86207
O35286_K786	Dhx15	IIAK*LQSK	DHX15_MOUSE Pre-mRNA-splicing factor ATP-dependent RNA helicase DHX15 OS=Mus musculus OX=10090 GN=Dhx15 PE=1 SV=2	0	0	0	0	0	3	1.17942
O35326_K163	Srsf5	NAIEK*LSGK	SRSF5_MOUSE Serine/arginine-rich splicing factor 5 OS=Mus musculus OX=10090 GN=Srsf5 PE=1 SV=2	0	0	0	0	4	0	1.08168
O35326_K167	Srsf5	LSGK*EINGR	SRSF5_MOUSE Serine/arginine-rich splicing factor 5 OS=Mus musculus OX=10090 GN=Srsf5 PE=1 SV=2	0	0	1	0	0	1	0.799435
O35465_K324	Fkbp8	AALK*LEPSNK	FKBP8_MOUSE Peptidyl-prolyl cis-trans isomerase FKBP8 OS=Mus musculus OX=10090 GN=Fkbp8 PE=1 SV=2	0	0	0	0	0	3	1.22198
O35598_K129	Adam10	FEGFIK*TR	ADA10_MOUSE Disintegrin and metalloproteinase domain-containing protein 10 OS=Mus musculus OX=10090 GN=Adam10 PE=1 SV=2	0	0	0	0	0	1	1.04167
O35643_K12	Ap1b1	K*GEIFELK	AP1B1_MOUSE AP-1 complex subunit beta-1 OS=Mus musculus OX=10090 GN=Ap1b1 PE=1 SV=2	0	0	0	0	0	1	0.8547
O35658_K120	C1qbp	K*VAGEK	C1QBP_MOUSE Complement component 1 Q subcomponent-binding protein, mitochondrial OS=Mus musculus OX=10090 GN=C1qbp PE=1 SV=1	0	0	0	0	3	1	1.01283
O35658_K91	C1qbp	AFVEFLTDEIKEEK*K	C1QBP_MOUSE Complement component 1 Q subcomponent-binding protein, mitochondrial OS=Mus musculus OX=10090 GN=C1qbp PE=1 SV=1	0	0	0	1	0	1	1.07153
O35701_K463	Matn3	LNTK*LDNILK	MATN3_MOUSE Matrilin-3 OS=Mus musculus OX=10090 GN=Matn3 PE=1 SV=2	0	0	0	0	1	0	0.78125
O35737_K14	Hnrnph1	EGFVVK*VR	HNRH1_MOUSE Heterogeneous nuclear ribonucleoprotein H OS=Mus musculus OX=10090 GN=Hnrnph1 PE=1 SV=3	0	0	0	0	0	1	0.88496
O35857_K121	Timm44	K*LGELTGTVK	TIM44_MOUSE Mitochondrial import inner membrane translocase subunit TIM44 OS=Mus musculus OX=10090 GN=Timm44 PE=1 SV=2	0	0	0	0	0	1	0.78125
O54689_K314	Ccr6	LGQK*FR	CCR6_MOUSE C-C chemokine receptor type 6 OS=Mus musculus OX=10090 GN=Ccr6 PE=1 SV=1	0	0	0	0	1	0	1.0101
O54692_K484	Zw10	ISEAVK*K	ZW10_MOUSE Centromere/kinetochore protein zw10 homolog OS=Mus musculus OX=10090 GN=Zw10 PE=1 SV=3	0	0	0	0	0	2	0.9387
O54824_K1251	Il16	GSLHGDK*PLTINR	IL16_MOUSE Pro-interleukin-16 OS=Mus musculus OX=10090 GN=Il16 PE=1 SV=3	0	0	0	0	4	1	1.08094
O54833_K103	Csnk2a2	LIDTVK*DPVSK	CSK22_MOUSE Casein kinase II subunit alpha' OS=Mus musculus OX=10090 GN=Csnk2a2 PE=1 SV=1	0	0	0	1	2	4	1.07373
O54879_K174	Hmgb3	GPAK*VAR	HMGB3_MOUSE High mobility group protein B3 OS=Mus musculus OX=10090 GN=Hmgb3 PE=1 SV=3	0	0	0	0	1	0	1.23457
O54879_K3	Hmgb3	AK*GDPK	HMGB3_MOUSE High mobility group protein B3 OS=Mus musculus OX=10090 GN=Hmgb3 PE=1 SV=3	0	0	0	1	0	0	0.89286
O54988_K981	Slk	IIQQQK*AELANIER	SLK_MOUSE STE20-like serine/threonine-protein kinase OS=Mus musculus OX=10090 GN=Slk PE=1 SV=2	0	0	0	0	0	2	0.988085
O55022_K102	Pgrmc1	VFDVTK*GR	PGRC1_MOUSE Membrane-associated progesterone receptor component 1 OS=Mus musculus OX=10090 GN=Pgrmc1 PE=1 SV=4	0	0	0	0	0	2	0.889045
O55131_K372	Septin7	LK*DSEAELQR	SEPT7_MOUSE Septin-7 OS=Mus musculus OX=10090 GN=Septin7 PE=1 SV=1	0	0	0	0	1	2	1.20854
O55143_K464	Atp2a2	GLSK*IER	AT2A2_MOUSE Sarcoplasmic/endoplasmic reticulum calcium ATPase 2 OS=Mus musculus OX=10090 GN=Atp2a2 PE=1 SV=2	0	0	0	5	6	6	1.02096
O70133_K55	Dhx9	K*DAQSNAAR	DHX9_MOUSE ATP-dependent RNA helicase A OS=Mus musculus OX=10090 GN=Dhx9 PE=1 SV=2	0	0	1	0	0	0	1.44928
O70133_K945	Dhx9	FCEQK*R	DHX9_MOUSE ATP-dependent RNA helicase A OS=Mus musculus OX=10090 GN=Dhx9 PE=1 SV=2	0	0	0	0	0	1	1.36986
O70145_K170	Ncf2	QK*LFEPVVIPVGR	NCF2_MOUSE Neutrophil cytosol factor 2 OS=Mus musculus OX=10090 GN=Ncf2 PE=1 SV=1	0	0	1	0	0	1	1.05838
O70145_K196	Ncf2	K*DYLGK	NCF2_MOUSE Neutrophil cytosol factor 2 OS=Mus musculus OX=10090 GN=Ncf2 PE=1 SV=1	0	0	0	0	1	0	1.03093
O70145_K336	Ncf2	LQLSPGHK*QK	NCF2_MOUSE Neutrophil cytosol factor 2 OS=Mus musculus OX=10090 GN=Ncf2 PE=1 SV=1	0	0	0	0	1	0	0.78125
O70145_K516	Ncf2	AFVEGCAAK*NLEGIPR	NCF2_MOUSE Neutrophil cytosol factor 2 OS=Mus musculus OX=10090 GN=Ncf2 PE=1 SV=1	0	0	1	1	1	3	1.0805
O70145_K68	Ncf2	DK*HSAVAYFQR	NCF2_MOUSE Neutrophil cytosol factor 2 OS=Mus musculus OX=10090 GN=Ncf2 PE=1 SV=1	0	0	0	0	2	0	1.41908
O70194_K412	Eif3d	QK*LDSQR	EIF3D_MOUSE Eukaryotic translation initiation factor 3 subunit D OS=Mus musculus OX=10090 GN=Eif3d PE=1 SV=2	0	0	1	0	0	0	0.76336
O70251_K129	Eef1b	LAQYESK*K	EF1B_MOUSE Elongation factor 1-beta OS=Mus musculus OX=10090 GN=Eef1b PE=1 SV=5	0	0	0	6	5	5	1.01917
O70251_K133	Eef1b	K*PAVVAK	EF1B_MOUSE Elongation factor 1-beta OS=Mus musculus OX=10090 GN=Eef1b PE=1 SV=5	0	0	0	2	4	4	1.04742
O70251_K66	Eef1b	EK*ASLPGVK	EF1B_MOUSE Elongation factor 1-beta OS=Mus musculus OX=10090 GN=Eef1b PE=1 SV=5	0	0	6	5	6	6	0.998838
O70252_K258	Hmox2	ETLEDGLPVHDGK*GDIR	HMOX2_MOUSE Heme oxygenase 2 OS=Mus musculus OX=10090 GN=Hmox2 PE=1 SV=1	0	0	0	0	4	4	1.03795
O70310_K464	Nmt1	TFLEK*LK	NMT1_MOUSE Glycylpeptide N-tetradecanoyltransferase 1 OS=Mus musculus OX=10090 GN=Nmt1 PE=1 SV=1	0	0	0	0	1	0	0.80645
O70591_K10	Pfdn2	VGK*SGGSGAGK	PFD2_MOUSE Prefoldin subunit 2 OS=Mus musculus OX=10090 GN=Pfdn2 PE=1 SV=2	0	0	0	3	0	1	1.25815
O88342_K569	Wdr1	VK*IQDAHR	WDR1_MOUSE WD repeat-containing protein 1 OS=Mus musculus OX=10090 GN=Wdr1 PE=1 SV=3	0	0	0	0	0	3	1.11262
O88379_K928	Baz1a	ETLLQEK*SR	BAZ1A_MOUSE Bromodomain adjacent to zinc finger domain protein 1A OS=Mus musculus OX=10090 GN=Baz1a PE=1 SV=3	0	0	0	0	0	1	1.11111
O88447_K502	Klc1	QGLDNVHK*QR	KLC1_MOUSE Kinesin light chain 1 OS=Mus musculus OX=10090 GN=Klc1 PE=1 SV=3	0	0	0	0	4	0	1.05038
O88448_K366	Klc2	LGPDDPNVAK*TK	KLC2_MOUSE Kinesin light chain 2 OS=Mus musculus OX=10090 GN=Klc2 PE=1 SV=1	0	0	0	0	1	0	1.20482
O88569_K104	Hnrnpa2b1	EESGK*PGAHVTVK	ROA2_MOUSE Heterogeneous nuclear ribonucleoproteins A2/B1 OS=Mus musculus OX=10090 GN=Hnrnpa2b1 PE=1 SV=2	0	0	1	0	6	4	1.08058
O88569_K17	Hnrnpa2b1	EK*EQFR	ROA2_MOUSE Heterogeneous nuclear ribonucleoproteins A2/B1 OS=Mus musculus OX=10090 GN=Hnrnpa2b1 PE=1 SV=2	0	0	0	0	1	0	1.08696
O88738_K3162	Birc6	FLDSGPNK*AVDSTLK	BIRC6_MOUSE Baculoviral IAP repeat-containing protein 6 OS=Mus musculus OX=10090 GN=Birc6 PE=1 SV=2	0	0	0	0	0	2	1.08178
O88738_K3969	Birc6	TIPDK*IGSASSSADAASK	BIRC6_MOUSE Baculoviral IAP repeat-containing protein 6 OS=Mus musculus OX=10090 GN=Birc6 PE=1 SV=2	0	0	0	0	1	0	1.17647
O88811_K343	Stam2	K*HSELSELNVK	STAM2_MOUSE Signal transducing adapter molecule 2 OS=Mus musculus OX=10090 GN=Stam2 PE=1 SV=1	0	0	0	0	1	0	1.02041
O88844_K406	Idh1	LGENLK*AK	IDHC_MOUSE Isocitrate dehydrogenase [NADP] cytoplasmic OS=Mus musculus OX=10090 GN=Idh1 PE=1 SV=2	0	0	0	0	0	2	1.25581
O89053_K132	Coro1a	EPVITLEGHTK*R	COR1A_MOUSE Coronin-1A OS=Mus musculus OX=10090 GN=Coro1a PE=1 SV=5	0	0	0	0	1	1	0.98684
O89053_K207	Coro1a	K*GTVVAEK	COR1A_MOUSE Coronin-1A OS=Mus musculus OX=10090 GN=Coro1a PE=1 SV=5	0	0	0	1	1	0	1.11996
O89053_K331	Coro1a	GLEVNK*CEIAR	COR1A_MOUSE Coronin-1A OS=Mus musculus OX=10090 GN=Coro1a PE=1 SV=5	0	0	1	0	6	4	0.904344
O89053_K393	Coro1a	DAGPLLISLK*DGYVPPK	COR1A_MOUSE Coronin-1A OS=Mus musculus OX=10090 GN=Coro1a PE=1 SV=5	0	0	0	1	0	0	1
O89053_K446	Coro1a	NLNAIVQK*LQER	COR1A_MOUSE Coronin-1A OS=Mus musculus OX=10090 GN=Coro1a PE=1 SV=5	0	0	1	3	1	1	1.03035
O89079_K278	Cope	YLSQLK*DAHR	COPE_MOUSE Coatomer subunit epsilon OS=Mus musculus OX=10090 GN=Cope PE=1 SV=3	0	0	0	0	6	1	0.91232
P03332_K353	gag	SPTNLAK*VK	GAG_MLVMS Gag polyprotein OS=Moloney murine leukemia virus (isolate Shinnick) OX=928306 GN=gag PE=1 SV=4	0	0	0	1	1	0	0.919365
P03332_K373	gag	LK*EAYR	GAG_MLVMS Gag polyprotein OS=Moloney murine leukemia virus (isolate Shinnick) OX=928306 GN=gag PE=1 SV=4	0	0	0	0	0	1	0.86207
P03332_K416	gag	LEDLK*NK	GAG_MLVMS Gag polyprotein OS=Moloney murine leukemia virus (isolate Shinnick) OX=928306 GN=gag PE=1 SV=4	0	0	0	0	1	0	1.33333
P03355_K353	gag-pol	SPTNLAK*VK	POL_MLVMS Gag-Pol polyprotein OS=Moloney murine leukemia virus (isolate Shinnick) OX=928306 GN=gag-pol PE=1 SV=5	0	0	1	1	0	1	0.965833
P03355_K416	gag-pol	LEDLK*NK	POL_MLVMS Gag-Pol polyprotein OS=Moloney murine leukemia virus (isolate Shinnick) OX=928306 GN=gag-pol PE=1 SV=5	0	0	0	0	0	1	0.87719
P03355_K65	gag-pol	DIITQVK*IK	POL_MLVMS Gag-Pol polyprotein OS=Moloney murine leukemia virus (isolate Shinnick) OX=928306 GN=gag-pol PE=1 SV=5	0	0	0	0	0	1	0.93458
P03385_K137	env	LK*LDQTTHK	ENV_MLVMS Envelope glycoprotein OS=Moloney murine leukemia virus (isolate Shinnick) OX=928306 GN=env PE=1 SV=1	0	0	2	0	2	4	1.01141
P03385_K144	env	LDQTTHK*SNEGFYVCPGPHRPR	ENV_MLVMS Envelope glycoprotein OS=Moloney murine leukemia virus (isolate Shinnick) OX=928306 GN=env PE=1 SV=1	0	0	0	0	1	0	1.13636
P04117_K106	Fabp4	STTIK*R	FABP4_MOUSE Fatty acid-binding protein, adipocyte OS=Mus musculus OX=10090 GN=Fabp4 PE=1 SV=3	0	0	0	0	1	0	1
P05064_K111	Aldoa	VDK*GVVPLAGTNGETTTQGLDGLSER	ALDOA_MOUSE Fructose-bisphosphate aldolase A OS=Mus musculus OX=10090 GN=Aldoa PE=1 SV=2	0	0	0	0	0	1	1.19048
P05064_K14	Aldoa	K*ELSDIAHR	ALDOA_MOUSE Fructose-bisphosphate aldolase A OS=Mus musculus OX=10090 GN=Aldoa PE=1 SV=2	0	0	2	5	5	5	1.01075
P05064_K28	Aldoa	IVAPGK*GILAADESTGSIAK	ALDOA_MOUSE Fructose-bisphosphate aldolase A OS=Mus musculus OX=10090 GN=Aldoa PE=1 SV=2	0	0	0	0	0	2	1.21149
P05064_K312	Aldoa	ALQASALK*AWGGK	ALDOA_MOUSE Fructose-bisphosphate aldolase A OS=Mus musculus OX=10090 GN=Aldoa PE=1 SV=2	0	0	0	2	0	0	1.02631
P05064_K322	Aldoa	ENLK*AAQEEYIK	ALDOA_MOUSE Fructose-bisphosphate aldolase A OS=Mus musculus OX=10090 GN=Aldoa PE=1 SV=2	0	0	0	0	0	2	1.31988
P05064_K330	Aldoa	AAQEEYIK*R	ALDOA_MOUSE Fructose-bisphosphate aldolase A OS=Mus musculus OX=10090 GN=Aldoa PE=1 SV=2	0	0	0	4	0	4	0.900056
P05064_K42	Aldoa	GILAADESTGSIAK*R	ALDOA_MOUSE Fructose-bisphosphate aldolase A OS=Mus musculus OX=10090 GN=Aldoa PE=1 SV=2	0	0	1	6	5	6	1.03458
P05132_K293	Prkaca	NGVNDIK*NHK	KAPCA_MOUSE cAMP-dependent protein kinase catalytic subunit alpha OS=Mus musculus OX=10090 GN=Prkaca PE=1 SV=3	0	0	0	0	2	5	0.88247
P05202_K82	Got2	K*AEAQIAAK	AATM_MOUSE Aspartate aminotransferase, mitochondrial OS=Mus musculus OX=10090 GN=Got2 PE=1 SV=1	0	0	1	4	1	1	1.15526
P05202_K90	Got2	KAEAQIAAK*NLDK	AATM_MOUSE Aspartate aminotransferase, mitochondrial OS=Mus musculus OX=10090 GN=Got2 PE=1 SV=1	0	0	0	0	1	4	1.02251
P05213_K326	Tuba1b	GDVVPK*DVNAAIATIK	TBA1B_MOUSE Tubulin alpha-1B chain OS=Mus musculus OX=10090 GN=Tuba1b PE=1 SV=2	0	0	1	1	1	1	0.888555
P05213_K336	Tuba1b	DVNAAIATIK*TK	TBA1B_MOUSE Tubulin alpha-1B chain OS=Mus musculus OX=10090 GN=Tuba1b PE=1 SV=2	0	0	1	1	1	1	1.10316
P05213_K60	Tuba1b	TIGGGDDSFNTFFSETGAGK*HVPR	TBA1B_MOUSE Tubulin alpha-1B chain OS=Mus musculus OX=10090 GN=Tuba1b PE=1 SV=2	0	0	0	0	1	0	1.33333
P06151_K155	Ldha	ISGFPK*NR	LDHA_MOUSE L-lactate dehydrogenase A chain OS=Mus musculus OX=10090 GN=Ldha PE=1 SV=3	0	0	0	4	0	6	1.20823
P06151_K224	Ldha	SLNPELGTDADK*EQWKEVHK	LDHA_MOUSE L-lactate dehydrogenase A chain OS=Mus musculus OX=10090 GN=Ldha PE=1 SV=3	0	0	0	0	2	0	1.06976
P06151_K228	Ldha	SLNPELGTDADKEQWK*EVHK	LDHA_MOUSE L-lactate dehydrogenase A chain OS=Mus musculus OX=10090 GN=Ldha PE=1 SV=3	0	0	0	0	3	3	0.859752
P06151_K232	Ldha	EVHK*QVVDSAYEVIK	LDHA_MOUSE L-lactate dehydrogenase A chain OS=Mus musculus OX=10090 GN=Ldha PE=1 SV=3	0	0	0	0	3	1	0.99994
P06151_K243	Ldha	QVVDSAYEVIK*LK	LDHA_MOUSE L-lactate dehydrogenase A chain OS=Mus musculus OX=10090 GN=Ldha PE=1 SV=3	0	0	0	1	0	2	1.25725
P06151_K318	Ldha	K*SADTLWGIQK	LDHA_MOUSE L-lactate dehydrogenase A chain OS=Mus musculus OX=10090 GN=Ldha PE=1 SV=3	0	0	2	0	3	1	1.09125
P06151_K76	Ldha	TPK*IVSSK	LDHA_MOUSE L-lactate dehydrogenase A chain OS=Mus musculus OX=10090 GN=Ldha PE=1 SV=3	0	0	2	1	3	3	1.15484
P06151_K81	Ldha	IVSSK*DYCVTANSK	LDHA_MOUSE L-lactate dehydrogenase A chain OS=Mus musculus OX=10090 GN=Ldha PE=1 SV=3	0	0	1	0	0	0	1.13636
P06745_K112	Gpi	SNTPIK*VDGK	G6PI_MOUSE Glucose-6-phosphate isomerase OS=Mus musculus OX=10090 GN=Gpi PE=1 SV=4	0	0	0	0	0	1	0.72464
P06745_K447	Gpi	K*ELQAAGK	G6PI_MOUSE Glucose-6-phosphate isomerase OS=Mus musculus OX=10090 GN=Gpi PE=1 SV=4	0	0	0	2	0	3	1.03942
P06745_K461	Gpi	SPEDLEK*LLPHK	G6PI_MOUSE Glucose-6-phosphate isomerase OS=Mus musculus OX=10090 GN=Gpi PE=1 SV=4	0	0	0	0	0	4	1.08659
P06745_K524	Gpi	K*IEPELEGSSAVTSHDSSTNGLISFIK	G6PI_MOUSE Glucose-6-phosphate isomerase OS=Mus musculus OX=10090 GN=Gpi PE=1 SV=4	0	0	0	0	0	1	1.1236
P06801_K324	Me1	EGLSK*ENAR	MAOX_MOUSE NADP-dependent malic enzyme OS=Mus musculus OX=10090 GN=Me1 PE=1 SV=2	0	0	0	0	0	2	1.11427
P06801_K492	Me1	VFLTTAEVISQQVSDK*HLQEGR	MAOX_MOUSE NADP-dependent malic enzyme OS=Mus musculus OX=10090 GN=Me1 PE=1 SV=2	0	0	0	0	1	0	0.93458
P06801_K523	Me1	IVQDAYK*EK	MAOX_MOUSE NADP-dependent malic enzyme OS=Mus musculus OX=10090 GN=Me1 PE=1 SV=2	0	0	0	0	0	1	0.9901
P06801_K60	Me1	IIK*NFER	MAOX_MOUSE NADP-dependent malic enzyme OS=Mus musculus OX=10090 GN=Me1 PE=1 SV=2	0	0	0	3	0	1	0.96583
P07091_K22	S100a4	YSGK*EGDKFK	S10A4_MOUSE Protein S100-A4 OS=Mus musculus OX=10090 GN=S100a4 PE=1 SV=1	0	0	4	6	6	6	1.02784
P07091_K26	S100a4	EGDK*FK	S10A4_MOUSE Protein S100-A4 OS=Mus musculus OX=10090 GN=S100a4 PE=1 SV=1	0	0	0	4	6	1	1.01656
P07091_K31	S100a4	LNK*TELK	S10A4_MOUSE Protein S100-A4 OS=Mus musculus OX=10090 GN=S100a4 PE=1 SV=1	0	0	0	5	5	6	0.999755
P07091_K35	S100a4	TELK*ELLTR	S10A4_MOUSE Protein S100-A4 OS=Mus musculus OX=10090 GN=S100a4 PE=1 SV=1	0	5	6	6	6	2	1.04147
P07091_K48	S100a4	ELPSFLGK*R	S10A4_MOUSE Protein S100-A4 OS=Mus musculus OX=10090 GN=S100a4 PE=1 SV=1	0	6	4	6	6	6	1.0714
P07091_K57	S100a4	TDEAAFQK*VMSNLDSNR	S10A4_MOUSE Protein S100-A4 OS=Mus musculus OX=10090 GN=S100a4 PE=1 SV=1	0	4	6	5	4	6	1.02168
P07356_K204	Anxa2	ELYDAGVK*R	ANXA2_MOUSE Annexin A2 OS=Mus musculus OX=10090 GN=Anxa2 PE=1 SV=2	0	0	0	0	0	2	0.99034
P07356_K206	Anxa2	K*GTDVPK	ANXA2_MOUSE Annexin A2 OS=Mus musculus OX=10090 GN=Anxa2 PE=1 SV=2	0	0	0	1	0	0	0.83333
P07356_K227	Anxa2	SVCHLQK*VFER	ANXA2_MOUSE Annexin A2 OS=Mus musculus OX=10090 GN=Anxa2 PE=1 SV=2	0	0	1	2	4	4	0.994857
P07356_K279	Anxa2	LYDSMK*GK	ANXA2_MOUSE Annexin A2 OS=Mus musculus OX=10090 GN=Anxa2 PE=1 SV=2	0	0	0	6	2	4	0.935273
P07356_K302	Anxa2	SEVDMLK*IR	ANXA2_MOUSE Annexin A2 OS=Mus musculus OX=10090 GN=Anxa2 PE=1 SV=2	0	0	0	4	4	5	1.04422
P07356_K47	Anxa2	DALNIETAVK*TK	ANXA2_MOUSE Annexin A2 OS=Mus musculus OX=10090 GN=Anxa2 PE=1 SV=2	0	0	0	0	2	0	1.362
P07356_K81	Anxa2	K*ELPSALK	ANXA2_MOUSE Annexin A2 OS=Mus musculus OX=10090 GN=Anxa2 PE=1 SV=2	0	0	0	0	0	2	0.729085
P07742_K496	Rrm1	IIDINYYPIPEAHLSNK*R	RIR1_MOUSE Ribonucleoside-diphosphate reductase large subunit OS=Mus musculus OX=10090 GN=Rrm1 PE=1 SV=2	0	0	0	0	1	0	0.76923
P07742_K689	Rrm1	TVWEISQK*TVLK	RIR1_MOUSE Ribonucleoside-diphosphate reductase large subunit OS=Mus musculus OX=10090 GN=Rrm1 PE=1 SV=2	0	0	0	0	2	0	0.946275
P07901_K500	Hsp90aa1	HIYFITGETK*DQVANSAFVER	HS90A_MOUSE Heat shock protein HSP 90-alpha OS=Mus musculus OX=10090 GN=Hsp90aa1 PE=1 SV=4	0	0	0	0	2	0	1.09144
P07901_K540	Hsp90aa1	EFEGK*TLVSVTK	HS90A_MOUSE Heat shock protein HSP 90-alpha OS=Mus musculus OX=10090 GN=Hsp90aa1 PE=1 SV=4	0	0	5	4	4	1	1.02185
P07901_K658	Hsp90aa1	AEADKNDK*SVK	HS90A_MOUSE Heat shock protein HSP 90-alpha OS=Mus musculus OX=10090 GN=Hsp90aa1 PE=1 SV=4	0	0	0	0	1	2	1.04524
P07901_K74	Hsp90aa1	LDSGK*ELHINLIPSK	HS90A_MOUSE Heat shock protein HSP 90-alpha OS=Mus musculus OX=10090 GN=Hsp90aa1 PE=1 SV=4	0	0	0	0	1	1	0.986735
P07901_K84	Hsp90aa1	ELHINLIPSK*QDR	HS90A_MOUSE Heat shock protein HSP 90-alpha OS=Mus musculus OX=10090 GN=Hsp90aa1 PE=1 SV=4	0	0	0	0	0	4	1.06831
P08113_K135	Hsp90b1	LISLTDENALAGNEELTVK*IK	ENPL_MOUSE Endoplasmin OS=Mus musculus OX=10090 GN=Hsp90b1 PE=1 SV=2	0	0	0	0	0	1	1.20482
P08113_K137	Hsp90b1	IK*CDKEK	ENPL_MOUSE Endoplasmin OS=Mus musculus OX=10090 GN=Hsp90b1 PE=1 SV=2	0	0	0	0	1	0	1.23457
P08113_K161	Hsp90b1	EELVK*NLGTIAK	ENPL_MOUSE Endoplasmin OS=Mus musculus OX=10090 GN=Hsp90b1 PE=1 SV=2	0	0	0	0	1	0	1.16279
P08113_K404	Hsp90b1	GLFDEYGSK*K	ENPL_MOUSE Endoplasmin OS=Mus musculus OX=10090 GN=Hsp90b1 PE=1 SV=2	0	0	0	1	3	1	0.956372
P08113_K405	Hsp90b1	K*SDYIK	ENPL_MOUSE Endoplasmin OS=Mus musculus OX=10090 GN=Hsp90b1 PE=1 SV=2	0	0	0	3	1	0	1.0546
P08113_K455	Hsp90b1	ETLQQHK*LLK	ENPL_MOUSE Endoplasmin OS=Mus musculus OX=10090 GN=Hsp90b1 PE=1 SV=2	0	0	0	0	3	0	0.923773
P08113_K467	Hsp90b1	K*TLDMIK	ENPL_MOUSE Endoplasmin OS=Mus musculus OX=10090 GN=Hsp90b1 PE=1 SV=2	0	0	0	0	0	1	0.84034
P08113_K597	Hsp90b1	EGVK*FDESEK	ENPL_MOUSE Endoplasmin OS=Mus musculus OX=10090 GN=Hsp90b1 PE=1 SV=2	0	0	0	0	2	0	1.32151
P08113_K630	Hsp90b1	ALKDK*IEK	ENPL_MOUSE Endoplasmin OS=Mus musculus OX=10090 GN=Hsp90b1 PE=1 SV=2	0	0	0	0	1	0	1.40845
P08113_K663	Hsp90b1	IMK*AQAYQTGK	ENPL_MOUSE Endoplasmin OS=Mus musculus OX=10090 GN=Hsp90b1 PE=1 SV=2	0	0	1	0	0	0	0.89286
P08113_K671	Hsp90b1	AQAYQTGK*DISTNYYASQK	ENPL_MOUSE Endoplasmin OS=Mus musculus OX=10090 GN=Hsp90b1 PE=1 SV=2	0	0	0	0	0	1	0.95238
P08113_K683	Hsp90b1	K*TFEINPR	ENPL_MOUSE Endoplasmin OS=Mus musculus OX=10090 GN=Hsp90b1 PE=1 SV=2	0	0	2	1	0	2	0.885404
P08207_K28	S100a10	FAGDKDHLTK*EDLR	S10AA_MOUSE Protein S100-A10 OS=Mus musculus OX=10090 GN=S100a10 PE=1 SV=2	0	0	0	0	6	6	1.17764
P08207_K57	S100a10	IMK*DLDQCR	S10AA_MOUSE Protein S100-A10 OS=Mus musculus OX=10090 GN=S100a10 PE=1 SV=2	0	2	1	1	0	4	1.00182
P08249_K157	Mdh2	K*HGVYNPNK	MDHM_MOUSE Malate dehydrogenase, mitochondrial OS=Mus musculus OX=10090 GN=Mdh2 PE=1 SV=3	0	0	3	2	6	2	1.02254
P08249_K239	Mdh2	IQEAGTEVVK*AK	MDHM_MOUSE Malate dehydrogenase, mitochondrial OS=Mus musculus OX=10090 GN=Mdh2 PE=1 SV=3	0	0	0	1	4	5	1.00717
P08249_K301	Mdh2	GLEK*NLGIGK	MDHM_MOUSE Malate dehydrogenase, mitochondrial OS=Mus musculus OX=10090 GN=Mdh2 PE=1 SV=3	0	0	4	4	6	6	1.02731
P08249_K307	Mdh2	NLGIGK*ITPFEEK	MDHM_MOUSE Malate dehydrogenase, mitochondrial OS=Mus musculus OX=10090 GN=Mdh2 PE=1 SV=3	0	0	0	0	4	1	1.23064
P08249_K314	Mdh2	ITPFEEK*MIAEAIPELK	MDHM_MOUSE Malate dehydrogenase, mitochondrial OS=Mus musculus OX=10090 GN=Mdh2 PE=1 SV=3	0	0	1	0	0	0	1.05263
P08249_K329	Mdh2	K*GEDFVK	MDHM_MOUSE Malate dehydrogenase, mitochondrial OS=Mus musculus OX=10090 GN=Mdh2 PE=1 SV=3	0	0	3	6	4	6	0.975439
P08752_K272	Gnai2	K*DLFEEK	GNAI2_MOUSE Guanine nucleotide-binding protein G(i) subunit alpha-2 OS=Mus musculus OX=10090 GN=Gnai2 PE=1 SV=5	0	0	0	0	2	0	1.32557
P09041_K353	Pgk2	GTK*ALMDEVVK	PGK2_MOUSE Phosphoglycerate kinase 2 OS=Mus musculus OX=10090 GN=Pgk2 PE=1 SV=4	0	0	0	0	1	2	1.15858
P09103_K285	P4hb	AAEGFK*GK	PDIA1_MOUSE Protein disulfide-isomerase OS=Mus musculus OX=10090 GN=P4hb PE=1 SV=2	0	0	0	0	0	1	0.79365
P09103_K417	P4hb	LGETYK*DHENIIIAK	PDIA1_MOUSE Protein disulfide-isomerase OS=Mus musculus OX=10090 GN=P4hb PE=1 SV=2	0	0	0	0	1	0	1.03093
P09103_K83	P4hb	LAK*VDATEESDLAQQYGVR	PDIA1_MOUSE Protein disulfide-isomerase OS=Mus musculus OX=10090 GN=P4hb PE=1 SV=2	0	0	6	1	3	6	0.952064
P09405_K102	Ncl	NITPAK*VIPTPGK	NUCL_MOUSE Nucleolin OS=Mus musculus OX=10090 GN=Ncl PE=1 SV=2	0	0	2	0	6	6	1.03277
P09405_K109	Ncl	VIPTPGK*K	NUCL_MOUSE Nucleolin OS=Mus musculus OX=10090 GN=Ncl PE=1 SV=2	0	0	0	2	0	6	1.0791
P09405_K110	Ncl	K*GAAQAK	NUCL_MOUSE Nucleolin OS=Mus musculus OX=10090 GN=Ncl PE=1 SV=2	0	0	2	5	3	4	0.951056
P09405_K116	Ncl	GAAQAK*ALVPTPGK	NUCL_MOUSE Nucleolin OS=Mus musculus OX=10090 GN=Ncl PE=1 SV=2	0	0	3	0	6	5	1.09591
P09405_K124	Ncl	ALVPTPGK*K	NUCL_MOUSE Nucleolin OS=Mus musculus OX=10090 GN=Ncl PE=1 SV=2	0	0	0	2	0	2	1.10248
P09405_K125	Ncl	K*GAATPAK	NUCL_MOUSE Nucleolin OS=Mus musculus OX=10090 GN=Ncl PE=1 SV=2	0	1	1	6	0	2	1.11379
P09405_K132	Ncl	GAATPAK*GAK	NUCL_MOUSE Nucleolin OS=Mus musculus OX=10090 GN=Ncl PE=1 SV=2	0	2	0	4	4	6	1.09519
P09405_K138	Ncl	NGK*NAK	NUCL_MOUSE Nucleolin OS=Mus musculus OX=10090 GN=Ncl PE=1 SV=2	0	0	0	0	1	0	0.84746
P09405_K15	Ncl	THGEAK*K	NUCL_MOUSE Nucleolin OS=Mus musculus OX=10090 GN=Ncl PE=1 SV=2	0	0	0	1	4	1	0.98231
P09405_K16	Ncl	K*MAPPPK	NUCL_MOUSE Nucleolin OS=Mus musculus OX=10090 GN=Ncl PE=1 SV=2	0	1	2	2	0	0	1.17069
P09405_K230	Ncl	TPAK*VVPMK	NUCL_MOUSE Nucleolin OS=Mus musculus OX=10090 GN=Ncl PE=1 SV=2	0	0	3	2	0	6	1.05252
P09405_K284	Ncl	KK*EMTK	NUCL_MOUSE Nucleolin OS=Mus musculus OX=10090 GN=Ncl PE=1 SV=2	0	0	1	0	0	0	0.79365
P09405_K290	Ncl	QK*EAPEAK	NUCL_MOUSE Nucleolin OS=Mus musculus OX=10090 GN=Ncl PE=1 SV=2	0	0	2	0	0	0	1.34051
P09405_K379	Ncl	VFGNEIK*LEKPK	NUCL_MOUSE Nucleolin OS=Mus musculus OX=10090 GN=Ncl PE=1 SV=2	0	0	2	0	5	6	1.07897
P09405_K384	Ncl	LEKPK*GR	NUCL_MOUSE Nucleolin OS=Mus musculus OX=10090 GN=Ncl PE=1 SV=2	0	0	0	5	2	3	1.02561
P09405_K400	Ncl	TLLAK*NLSFNITEDELK	NUCL_MOUSE Nucleolin OS=Mus musculus OX=10090 GN=Ncl PE=1 SV=2	0	0	1	2	0	0	1.12893
P09405_K429	Ncl	LVSQDGK*SK	NUCL_MOUSE Nucleolin OS=Mus musculus OX=10090 GN=Ncl PE=1 SV=2	0	0	0	5	2	4	0.982495
P09405_K451	Ncl	NLEEK*QGAEIDGR	NUCL_MOUSE Nucleolin OS=Mus musculus OX=10090 GN=Ncl PE=1 SV=2	0	0	0	0	1	0	0.9434
P09405_K469	Ncl	SVSLYYTGEK*GQR	NUCL_MOUSE Nucleolin OS=Mus musculus OX=10090 GN=Ncl PE=1 SV=2	0	0	0	0	1	1	0.916165
P09405_K478	Ncl	TGK*TSTWSGESK	NUCL_MOUSE Nucleolin OS=Mus musculus OX=10090 GN=Ncl PE=1 SV=2	0	0	0	0	5	0	0.860394
P09405_K514	Ncl	ATFIK*VPQNPHGK	NUCL_MOUSE Nucleolin OS=Mus musculus OX=10090 GN=Ncl PE=1 SV=2	0	0	3	4	1	4	0.939232
P09405_K522	Ncl	VPQNPHGK*PK	NUCL_MOUSE Nucleolin OS=Mus musculus OX=10090 GN=Ncl PE=1 SV=2	0	1	1	0	5	6	1.12247
P09405_K546	Ncl	EALNSCNK*MEIEGR	NUCL_MOUSE Nucleolin OS=Mus musculus OX=10090 GN=Ncl PE=1 SV=2	0	0	1	0	0	2	1.23406
P09405_K55	Ncl	K*ATTTPAK	NUCL_MOUSE Nucleolin OS=Mus musculus OX=10090 GN=Ncl PE=1 SV=2	0	0	2	5	0	2	1.05104
P09405_K574	Ncl	TLFVK*GLSEDTTEETLK	NUCL_MOUSE Nucleolin OS=Mus musculus OX=10090 GN=Ncl PE=1 SV=2	0	0	0	0	1	0	1.26582
P09405_K586	Ncl	GLSEDTTEETLK*ESFEGSVR	NUCL_MOUSE Nucleolin OS=Mus musculus OX=10090 GN=Ncl PE=1 SV=2	0	0	0	0	0	1	1.0989
P09405_K62	Ncl	ATTTPAK*K	NUCL_MOUSE Nucleolin OS=Mus musculus OX=10090 GN=Ncl PE=1 SV=2	0	0	0	4	0	3	1.14327
P09405_K621	Ncl	GFGFVDFNSEEDAK*AAK	NUCL_MOUSE Nucleolin OS=Mus musculus OX=10090 GN=Ncl PE=1 SV=2	0	0	2	3	1	2	1.02657
P09405_K63	Ncl	K*VVVSQTK	NUCL_MOUSE Nucleolin OS=Mus musculus OX=10090 GN=Ncl PE=1 SV=2	0	0	0	3	0	0	0.931913
P09405_K643	Ncl	VTLDWAK*PK	NUCL_MOUSE Nucleolin OS=Mus musculus OX=10090 GN=Ncl PE=1 SV=2	0	0	0	2	0	0	0.96675
P09405_K698	Ncl	GGGGDFK*PQGK	NUCL_MOUSE Nucleolin OS=Mus musculus OX=10090 GN=Ncl PE=1 SV=2	0	0	0	0	0	6	1.05492
P09405_K70	Ncl	VVVSQTK*K	NUCL_MOUSE Nucleolin OS=Mus musculus OX=10090 GN=Ncl PE=1 SV=2	0	0	0	5	0	5	0.994651
P09405_K71	Ncl	K*AAVPTPAK	NUCL_MOUSE Nucleolin OS=Mus musculus OX=10090 GN=Ncl PE=1 SV=2	0	0	2	6	0	4	0.969475
P09405_K79	Ncl	AAVPTPAK*K	NUCL_MOUSE Nucleolin OS=Mus musculus OX=10090 GN=Ncl PE=1 SV=2	0	0	0	5	0	4	1.02433
P09405_K80	Ncl	K*AAVTPGK	NUCL_MOUSE Nucleolin OS=Mus musculus OX=10090 GN=Ncl PE=1 SV=2	0	1	4	5	1	5	1.10811
P09405_K87	Ncl	AAVTPGK*K	NUCL_MOUSE Nucleolin OS=Mus musculus OX=10090 GN=Ncl PE=1 SV=2	0	0	0	5	0	3	1.04185
P09405_K88	Ncl	K*AVATPAK	NUCL_MOUSE Nucleolin OS=Mus musculus OX=10090 GN=Ncl PE=1 SV=2	0	0	5	6	0	2	0.998358
P09405_K9	Ncl	AGK*THGEAK	NUCL_MOUSE Nucleolin OS=Mus musculus OX=10090 GN=Ncl PE=1 SV=2	0	0	0	4	6	3	1.26811
P09405_K95	Ncl	AVATPAK*K	NUCL_MOUSE Nucleolin OS=Mus musculus OX=10090 GN=Ncl PE=1 SV=2	0	0	0	6	0	2	1.10853
P09405_K96	Ncl	K*NITPAK	NUCL_MOUSE Nucleolin OS=Mus musculus OX=10090 GN=Ncl PE=1 SV=2	0	0	0	4	0	4	1.30852
P09411_K11	Pgk1	LTLDK*LDVK	PGK1_MOUSE Phosphoglycerate kinase 1 OS=Mus musculus OX=10090 GN=Pgk1 PE=1 SV=4	0	0	0	2	2	5	1.08431
P09411_K131	Pgk1	FHVEEEGK*GK	PGK1_MOUSE Phosphoglycerate kinase 1 OS=Mus musculus OX=10090 GN=Pgk1 PE=1 SV=4	0	0	1	1	1	1	1.04629
P09411_K133	Pgk1	GK*DASGNK	PGK1_MOUSE Phosphoglycerate kinase 1 OS=Mus musculus OX=10090 GN=Pgk1 PE=1 SV=4	0	0	4	6	3	5	0.915262
P09411_K139	Pgk1	DASGNK*VK	PGK1_MOUSE Phosphoglycerate kinase 1 OS=Mus musculus OX=10090 GN=Pgk1 PE=1 SV=4	0	0	0	5	4	4	1.04419
P09411_K141	Pgk1	VK*AEPAK	PGK1_MOUSE Phosphoglycerate kinase 1 OS=Mus musculus OX=10090 GN=Pgk1 PE=1 SV=4	0	2	6	6	6	6	1.0413
P09411_K146	Pgk1	AEPAK*IDAFR	PGK1_MOUSE Phosphoglycerate kinase 1 OS=Mus musculus OX=10090 GN=Pgk1 PE=1 SV=4	0	0	2	4	5	5	0.984639
P09411_K15	Pgk1	LTLDKLDVK*GK	PGK1_MOUSE Phosphoglycerate kinase 1 OS=Mus musculus OX=10090 GN=Pgk1 PE=1 SV=4	0	0	0	0	2	2	0.925895
P09411_K156	Pgk1	ASLSK*LGDVYVNDAFGTAHR	PGK1_MOUSE Phosphoglycerate kinase 1 OS=Mus musculus OX=10090 GN=Pgk1 PE=1 SV=4	0	0	1	0	1	1	1.04649
P09411_K191	Pgk1	AGGFLMK*K	PGK1_MOUSE Phosphoglycerate kinase 1 OS=Mus musculus OX=10090 GN=Pgk1 PE=1 SV=4	0	0	0	6	6	3	1.04848
P09411_K192	Pgk1	K*ELNYFAK	PGK1_MOUSE Phosphoglycerate kinase 1 OS=Mus musculus OX=10090 GN=Pgk1 PE=1 SV=4	0	0	5	1	4	4	0.999834
P09411_K267	Pgk1	IVK*DLMSK	PGK1_MOUSE Phosphoglycerate kinase 1 OS=Mus musculus OX=10090 GN=Pgk1 PE=1 SV=4	0	0	1	0	4	5	1.1015
P09411_K272	Pgk1	DLMSK*AEK	PGK1_MOUSE Phosphoglycerate kinase 1 OS=Mus musculus OX=10090 GN=Pgk1 PE=1 SV=4	0	0	0	0	2	0	1.08176
P09411_K279	Pgk1	NGVK*ITLPVDFVTADKFDENAK	PGK1_MOUSE Phosphoglycerate kinase 1 OS=Mus musculus OX=10090 GN=Pgk1 PE=1 SV=4	0	0	1	0	2	2	1.23367
P09411_K323	Pgk1	K*YAEAVGR	PGK1_MOUSE Phosphoglycerate kinase 1 OS=Mus musculus OX=10090 GN=Pgk1 PE=1 SV=4	0	0	1	4	0	4	1.01179
P09411_K353	Pgk1	GTK*SLMDEVVK	PGK1_MOUSE Phosphoglycerate kinase 1 OS=Mus musculus OX=10090 GN=Pgk1 PE=1 SV=4	0	0	6	6	6	6	0.997991
P09411_K361	Pgk1	SLMDEVVK*ATSR	PGK1_MOUSE Phosphoglycerate kinase 1 OS=Mus musculus OX=10090 GN=Pgk1 PE=1 SV=4	0	0	0	4	0	4	1.00753
P09411_K388	Pgk1	WNTEDK*VSHVSTGGGASLELLEGK	PGK1_MOUSE Phosphoglycerate kinase 1 OS=Mus musculus OX=10090 GN=Pgk1 PE=1 SV=4	0	0	0	0	1	0	1.23457
P09411_K41	Pgk1	IK*AAVPSIK	PGK1_MOUSE Phosphoglycerate kinase 1 OS=Mus musculus OX=10090 GN=Pgk1 PE=1 SV=4	0	0	0	0	0	3	0.863923
P09602_K59	Hmgn2	GK*ADAGK	HMGN2_MOUSE Non-histone chromosomal protein HMG-17 OS=Mus musculus OX=10090 GN=Hmgn2 PE=1 SV=2	0	0	0	2	0	0	1.13637
P0DOH6_K153		DIITQVK*IK	GGAG_MLVFP Glyco-Gag protein OS=Friend murine leukemia virus (isolate PVC-211) OX=11798 PE=3 SV=1	0	0	0	0	0	3	0.99545
P0DOH6_K441		SPTNLAK*VK	GGAG_MLVFP Glyco-Gag protein OS=Friend murine leukemia virus (isolate PVC-211) OX=11798 PE=3 SV=1	0	0	0	3	2	2	0.988317
P0DP28_K22	Calm3	EAFSLFDK*DGDGTITTK	CALM3_MOUSE Calmodulin-3 OS=Mus musculus OX=10090 GN=Calm3 PE=1 SV=1	0	0	0	2	0	0	1.11111
P10126_K165	Eef1a1	MDSTEPPYSQK*R	EF1A1_MOUSE Elongation factor 1-alpha 1 OS=Mus musculus OX=10090 GN=Eef1a1 PE=1 SV=3	0	0	2	1	0	3	1.00275
P10126_K172	Eef1a1	YEEIVK*EVSTYIK	EF1A1_MOUSE Elongation factor 1-alpha 1 OS=Mus musculus OX=10090 GN=Eef1a1 PE=1 SV=3	0	0	0	0	1	0	0.8547
P10126_K179	Eef1a1	EVSTYIK*K	EF1A1_MOUSE Elongation factor 1-alpha 1 OS=Mus musculus OX=10090 GN=Eef1a1 PE=1 SV=3	0	0	0	6	1	3	1.06154
P10126_K215	Eef1a1	GWK*VTR	EF1A1_MOUSE Elongation factor 1-alpha 1 OS=Mus musculus OX=10090 GN=Eef1a1 PE=1 SV=3	0	0	0	1	4	4	0.934806
P10126_K219	Eef1a1	K*DGSASGTTLLEALDCILPPTRPTDKPLR K*DGSASGTTLLEALDCILPPTRPTDK	EF1A1_MOUSE Elongation factor 1-alpha 1 OS=Mus musculus OX=10090 GN=Eef1a1 PE=1 SV=3	0	0	2	1	0	1	0.718007
P10126_K244	Eef1a1	PTDK*PLR	EF1A1_MOUSE Elongation factor 1-alpha 1 OS=Mus musculus OX=10090 GN=Eef1a1 PE=1 SV=3	0	0	0	0	0	1	1.05263
P10126_K255	Eef1a1	LPLQDVYK*IGGIGTVPVGR	EF1A1_MOUSE Elongation factor 1-alpha 1 OS=Mus musculus OX=10090 GN=Eef1a1 PE=1 SV=3	0	0	2	3	0	2	1.06721
P10126_K273	Eef1a1	VETGVLK*PGMVVTFAPVNVTTEVK	EF1A1_MOUSE Elongation factor 1-alpha 1 OS=Mus musculus OX=10090 GN=Eef1a1 PE=1 SV=3	0	1	2	2	0	1	1.0324
P10126_K386	Eef1a1	K*LEDGPK	EF1A1_MOUSE Elongation factor 1-alpha 1 OS=Mus musculus OX=10090 GN=Eef1a1 PE=1 SV=3	2	2	5	6	6	6	1.00014
P10126_K392	Eef1a1	KLEDGPK*FLK LEDGPK*FLK	EF1A1_MOUSE Elongation factor 1-alpha 1 OS=Mus musculus OX=10090 GN=Eef1a1 PE=1 SV=3	0	0	6	3	6	6	1.05146
P10126_K41	Eef1a1	TIEK*FEK	EF1A1_MOUSE Elongation factor 1-alpha 1 OS=Mus musculus OX=10090 GN=Eef1a1 PE=1 SV=3	0	2	0	6	6	6	0.973019
P10126_K44	Eef1a1	FEK*EAAEMGK	EF1A1_MOUSE Elongation factor 1-alpha 1 OS=Mus musculus OX=10090 GN=Eef1a1 PE=1 SV=3	0	0	6	5	5	5	1.05147
P10126_K444	Eef1a1	K*AAGAGK	EF1A1_MOUSE Elongation factor 1-alpha 1 OS=Mus musculus OX=10090 GN=Eef1a1 PE=1 SV=3	0	1	5	6	5	6	0.910327
P10126_K450	Eef1a1	AAGAGK*VTK	EF1A1_MOUSE Elongation factor 1-alpha 1 OS=Mus musculus OX=10090 GN=Eef1a1 PE=1 SV=3	0	3	2	6	6	6	1.06604
P10126_K453	Eef1a1	VTK*SAQK	EF1A1_MOUSE Elongation factor 1-alpha 1 OS=Mus musculus OX=10090 GN=Eef1a1 PE=1 SV=3	0	5	2	6	6	6	0.943566
P10126_K457	Eef1a1	SAQK*AQK	EF1A1_MOUSE Elongation factor 1-alpha 1 OS=Mus musculus OX=10090 GN=Eef1a1 PE=1 SV=3	0	4	0	6	6	6	0.989618
P10404_K173		NQGPCYDSSAVSSDIK*GATPGGR	ENV1_MOUSE MLV-related proviral Env polyprotein OS=Mus musculus OX=10090 PE=1 SV=3	0	0	0	0	0	2	0.786565
P10404_K193		CNPLVLEFTDAGK*K	ENV1_MOUSE MLV-related proviral Env polyprotein OS=Mus musculus OX=10090 PE=1 SV=3	0	0	0	1	0	0	1.07527
P10404_K194		K*ASWDGPK	ENV1_MOUSE MLV-related proviral Env polyprotein OS=Mus musculus OX=10090 PE=1 SV=3	0	0	0	0	1	1	1.02083
P10639_K3	Txn	VK*LIESK	THIO_MOUSE Thioredoxin OS=Mus musculus OX=10090 GN=Txn PE=1 SV=3	5	0	6	6	6	6	0.987586
P10639_K8	Txn	LIESK*EAFQEALAAAGDK	THIO_MOUSE Thioredoxin OS=Mus musculus OX=10090 GN=Txn PE=1 SV=3	0	0	0	0	0	2	1.32923
P10639_K85	Txn	KGQK*VGEFSGANK GQK*VGEFSGANK	THIO_MOUSE Thioredoxin OS=Mus musculus OX=10090 GN=Txn PE=1 SV=3	0	0	1	0	2	2	1.3073
P10639_K94	Txn	VGEFSGANK*EK	THIO_MOUSE Thioredoxin OS=Mus musculus OX=10090 GN=Txn PE=1 SV=3	0	2	0	6	6	4	1.04791
P10711_K199	Tcea1	ISNLK*DAK	TCEA1_MOUSE Transcription elongation factor A protein 1 OS=Mus musculus OX=10090 GN=Tcea1 PE=1 SV=2	0	0	0	1	2	3	0.98661
P10711_K242	Tcea1	NLTK*EAIR	TCEA1_MOUSE Transcription elongation factor A protein 1 OS=Mus musculus OX=10090 GN=Tcea1 PE=1 SV=2	0	0	0	0	0	3	1.02911
P10854_K6	H2bc14	PEPTK*SAPAPK	H2B1M_MOUSE Histone H2B type 1-M OS=Mus musculus OX=10090 GN=H2bc14 PE=1 SV=2	0	0	5	3	2	6	1.05799
P11103_K620	Parp1	LYEEK*TGNAWHSK	PARP1_MOUSE Poly [ADP-ribose] polymerase 1 OS=Mus musculus OX=10090 GN=Parp1 PE=1 SV=3	0	0	0	0	4	0	0.778008
P11365_K69	gag	GLEPEEK*LR	GAG_IPMA Intracisternal A-particle Gag-related polyprotein OS=Mouse intracisternal a-particle MIA14 OX=11753 GN=gag PE=3 SV=2	0	0	0	0	0	3	0.959843
P11440_K279	Cdk1	ISGK*MALK	CDK1_MOUSE Cyclin-dependent kinase 1 OS=Mus musculus OX=10090 GN=Cdk1 PE=1 SV=3	0	0	0	0	0	1	0.84034
P11499_K347	Hsp90ab1	APFDLFENK*K	HS90B_MOUSE Heat shock protein HSP 90-beta OS=Mus musculus OX=10090 GN=Hsp90ab1 PE=1 SV=3	0	6	4	6	6	2	1.07333
P11499_K435	Hsp90ab1	FYEAFSK*NLK	HS90B_MOUSE Heat shock protein HSP 90-beta OS=Mus musculus OX=10090 GN=Hsp90ab1 PE=1 SV=3	0	0	0	0	1	0	1.36986
P11499_K531	Hsp90ab1	EFDGK*SLVSVTK	HS90B_MOUSE Heat shock protein HSP 90-beta OS=Mus musculus OX=10090 GN=Hsp90ab1 PE=1 SV=3	0	0	0	0	1	0	1.06383
P11499_K557	Hsp90ab1	MEESK*AK	HS90B_MOUSE Heat shock protein HSP 90-beta OS=Mus musculus OX=10090 GN=Hsp90ab1 PE=1 SV=3	0	0	0	1	2	2	0.99106
P11499_K559	Hsp90ab1	AK*FENLCK	HS90B_MOUSE Heat shock protein HSP 90-beta OS=Mus musculus OX=10090 GN=Hsp90ab1 PE=1 SV=3	0	0	1	0	0	1	0.985865
P11499_K568	Hsp90ab1	LMK*EILDK	HS90B_MOUSE Heat shock protein HSP 90-beta OS=Mus musculus OX=10090 GN=Hsp90ab1 PE=1 SV=3	0	0	0	0	6	0	1.00521
P11499_K577	Hsp90ab1	VEK*VTISNR	HS90B_MOUSE Heat shock protein HSP 90-beta OS=Mus musculus OX=10090 GN=Hsp90ab1 PE=1 SV=3	0	0	4	1	0	0	1.09732
P11499_K624	Hsp90ab1	K*HLEINPDHPIVETLR	HS90B_MOUSE Heat shock protein HSP 90-beta OS=Mus musculus OX=10090 GN=Hsp90ab1 PE=1 SV=3	0	0	1	2	6	3	1.00557
P11499_K649	Hsp90ab1	AEADKNDK*AVK	HS90B_MOUSE Heat shock protein HSP 90-beta OS=Mus musculus OX=10090 GN=Hsp90ab1 PE=1 SV=3	0	0	2	4	6	2	1.05004
P11499_K69	Hsp90ab1	LDSGK*ELK	HS90B_MOUSE Heat shock protein HSP 90-beta OS=Mus musculus OX=10090 GN=Hsp90ab1 PE=1 SV=3	0	0	0	0	0	2	0.97619
P11680_K358	Cfp	PCAGK*LQDIR	PROP_MOUSE Properdin OS=Mus musculus OX=10090 GN=Cfp PE=1 SV=2	0	0	0	0	0	2	1.02052
P11680_K441	Cfp	PLCEALQGQK*LVVEEK	PROP_MOUSE Properdin OS=Mus musculus OX=10090 GN=Cfp PE=1 SV=2	0	0	0	0	0	1	1.25
P11928_K43	Oas1a	SAVNVVCDFLK*ER	OAS1A_MOUSE 2'-5'-oligoadenylate synthase 1A OS=Mus musculus OX=10090 GN=Oas1a PE=1 SV=2	0	0	0	0	1	2	1.15968
P11928_K61	Oas1a	VVK*GGSSGK	OAS1A_MOUSE 2'-5'-oligoadenylate synthase 1A OS=Mus musculus OX=10090 GN=Oas1a PE=1 SV=2	0	0	0	1	0	1	1.16173
P11928_K72	Oas1a	GTTLK*GK	OAS1A_MOUSE 2'-5'-oligoadenylate synthase 1A OS=Mus musculus OX=10090 GN=Oas1a PE=1 SV=2	0	0	0	0	1	4	1.00859
P11983_K126	Tcp1	LACK*EAVR	TCPA_MOUSE T-complex protein 1 subunit alpha OS=Mus musculus OX=10090 GN=Tcp1 PE=1 SV=3	0	0	0	0	0	1	1.25368
P11983_K317	Tcp1	DLK*HVAK	TCPA_MOUSE T-complex protein 1 subunit alpha OS=Mus musculus OX=10090 GN=Tcp1 PE=1 SV=3	0	0	0	0	2	0	0.91867
P11983_K499	Tcp1	DNK*QAGVFEPTIVK	TCPA_MOUSE T-complex protein 1 subunit alpha OS=Mus musculus OX=10090 GN=Tcp1 PE=1 SV=3	0	0	0	0	1	3	0.869712
P11983_K538	Tcp1	LHPESK*DDK	TCPA_MOUSE T-complex protein 1 subunit alpha OS=Mus musculus OX=10090 GN=Tcp1 PE=1 SV=3	0	0	0	0	3	2	1.02302
P11983_K541	Tcp1	DDK*HGSYENAVHSGALDD	TCPA_MOUSE T-complex protein 1 subunit alpha OS=Mus musculus OX=10090 GN=Tcp1 PE=1 SV=3	0	0	0	0	4	0	1.1223
P12265_K346	Gusb	PFYFQGVNK*HEDSDIR	BGLR_MOUSE Beta-glucuronidase OS=Mus musculus OX=10090 GN=Gusb PE=1 SV=2	0	0	0	0	5	3	1.04241
P12382_K726	Pfkl	VVAFSPVTELK*K	PFKAL_MOUSE ATP-dependent 6-phosphofructokinase, liver type OS=Mus musculus OX=10090 GN=Pfkl PE=1 SV=4	0	0	0	5	0	2	0.994237
P12970_K11	Rpl7a	K*VAPAPAVVK	RL7A_MOUSE 60S ribosomal protein L7a OS=Mus musculus OX=10090 GN=Rpl7a PE=1 SV=2	0	0	0	2	0	3	1.01367
P12970_K125	Rpl7a	AAGK*GDVPTK	RL7A_MOUSE 60S ribosomal protein L7a OS=Mus musculus OX=10090 GN=Rpl7a PE=1 SV=2	0	0	4	3	0	2	1.00227
P12970_K131	Rpl7a	GDVPTK*RPPVLR	RL7A_MOUSE 60S ribosomal protein L7a OS=Mus musculus OX=10090 GN=Rpl7a PE=1 SV=2	0	0	0	0	1	2	1.05026
P12970_K20	Rpl7a	VAPAPAVVK*K	RL7A_MOUSE 60S ribosomal protein L7a OS=Mus musculus OX=10090 GN=Rpl7a PE=1 SV=2	0	0	0	0	0	3	0.951493
P12970_K26	Rpl7a	K*VVNPLFEK	RL7A_MOUSE 60S ribosomal protein L7a OS=Mus musculus OX=10090 GN=Rpl7a PE=1 SV=2	0	0	0	0	1	0	0.97087
P12970_K34	Rpl7a	VVNPLFEK*R	RL7A_MOUSE 60S ribosomal protein L7a OS=Mus musculus OX=10090 GN=Rpl7a PE=1 SV=2	0	0	0	1	0	1	1.12325
P13020_K621	Gsn	TGAQELLK*VLR	GELS_MOUSE Gelsolin OS=Mus musculus OX=10090 GN=Gsn PE=1 SV=3	0	0	0	0	0	1	0.97087
P14069_K22	S100a6	YSGK*EGDKHTLSK	S10A6_MOUSE Protein S100-A6 OS=Mus musculus OX=10090 GN=S100a6 PE=1 SV=3	0	0	1	0	0	0	0.95238
P14069_K26	S100a6	EGDK*HTLSK	S10A6_MOUSE Protein S100-A6 OS=Mus musculus OX=10090 GN=S100a6 PE=1 SV=3	0	0	0	0	5	3	1.07771
P14069_K35	S100a6	ELK*ELIQK	S10A6_MOUSE Protein S100-A6 OS=Mus musculus OX=10090 GN=S100a6 PE=1 SV=3	0	0	0	0	2	3	0.958684
P14069_K40	S100a6	ELIQK*ELTIGSK	S10A6_MOUSE Protein S100-A6 OS=Mus musculus OX=10090 GN=S100a6 PE=1 SV=3	0	0	0	0	4	0	1.02938
P14069_K47	S100a6	ELTIGSK*LQDAEIAR	S10A6_MOUSE Protein S100-A6 OS=Mus musculus OX=10090 GN=S100a6 PE=1 SV=3	0	0	4	2	1	1	1.04327
P14115_K92	Rpl27a	VNAAK*NK	RL27A_MOUSE 60S ribosomal protein L27a OS=Mus musculus OX=10090 GN=Rpl27a PE=1 SV=5	0	0	0	1	2	0	1.01225
P14115_K94	Rpl27a	NK*TGVAPIIDVVR	RL27A_MOUSE 60S ribosomal protein L27a OS=Mus musculus OX=10090 GN=Rpl27a PE=1 SV=5	0	0	1	0	0	2	1.00951
P14131_K60	Rps16	LLEPVLLLGK*ER	RS16_MOUSE 40S ribosomal protein S16 OS=Mus musculus OX=10090 GN=Rps16 PE=1 SV=4	0	0	2	2	0	0	0.984883
P14148_K10	Rpl7	K*VATVPGTLK	RL7_MOUSE 60S ribosomal protein L7 OS=Mus musculus OX=10090 GN=Rpl7 PE=1 SV=2	0	0	2	0	0	0	0.882045
P14148_K27	Rpl7	VPAGPK*TLK	RL7_MOUSE 60S ribosomal protein L7 OS=Mus musculus OX=10090 GN=Rpl7 PE=1 SV=2	0	0	0	0	0	1	1.35135
P14152_K103	Mdh1	DLLK*ANVK	MDHC_MOUSE Malate dehydrogenase, cytoplasmic OS=Mus musculus OX=10090 GN=Mdh1 PE=1 SV=3	0	0	0	0	0	1	0.96154
P14152_K107	Mdh1	ANVK*IFK	MDHC_MOUSE Malate dehydrogenase, cytoplasmic OS=Mus musculus OX=10090 GN=Mdh1 PE=1 SV=3	0	0	0	0	0	1	1.02041
P14152_K110	Mdh1	IFK*SQGTALEK	MDHC_MOUSE Malate dehydrogenase, cytoplasmic OS=Mus musculus OX=10090 GN=Mdh1 PE=1 SV=3	0	0	0	0	0	1	1.05263
P14211_K276	Calr	GEWK*PR	CALR_MOUSE Calreticulin OS=Mus musculus OX=10090 GN=Calr PE=1 SV=1	0	0	0	0	1	0	1.26812
P14211_K355	Calr	AAEK*QMK	CALR_MOUSE Calreticulin OS=Mus musculus OX=10090 GN=Calr PE=1 SV=1	0	0	0	1	0	0	0.84034
P14211_K43	Calr	HK*SDFGK	CALR_MOUSE Calreticulin OS=Mus musculus OX=10090 GN=Calr PE=1 SV=1	0	0	0	0	2	2	1.07694
P14576_K149	Srp54	AGAFDQLK*QNATK	SRP54_MOUSE Signal recognition particle 54 kDa protein OS=Mus musculus OX=10090 GN=Srp54 PE=1 SV=2	0	0	0	0	0	1	1.44928
P14576_K81	Srp54	FK*ELVK	SRP54_MOUSE Signal recognition particle 54 kDa protein OS=Mus musculus OX=10090 GN=Srp54 PE=1 SV=2	0	0	0	1	0	1	1.1544
P14685_K72	Psmd3	ELDTVTLEDIK*EHVR	PSMD3_MOUSE 26S proteasome non-ATPase regulatory subunit 3 OS=Mus musculus OX=10090 GN=Psmd3 PE=1 SV=3	0	0	0	0	1	0	1.40845
P14733_K135	Lmnb1	ESDLSGAQIK*LR	LMNB1_MOUSE Lamin-B1 OS=Mus musculus OX=10090 GN=Lmnb1 PE=1 SV=3	0	0	0	1	0	6	1.07619
P14733_K157	Lmnb1	DAALATALGDK*K	LMNB1_MOUSE Lamin-B1 OS=Mus musculus OX=10090 GN=Lmnb1 PE=1 SV=3	0	0	0	0	0	1	1.07527
P14733_K272	Lmnb1	EELEQTYHAK*LENAR LYKEELEQTYHAK*LENAR	LMNB1_MOUSE Lamin-B1 OS=Mus musculus OX=10090 GN=Lmnb1 PE=1 SV=3	0	0	0	0	4	3	1.00081
P15307_K251	Rel	TPPYCK*AILEPVTVK	REL_MOUSE Proto-oncogene c-Rel OS=Mus musculus OX=10090 GN=Rel PE=1 SV=2	0	0	0	1	0	0	0.89286
P15307_K290	Rel	DAYGNK*SK	REL_MOUSE Proto-oncogene c-Rel OS=Mus musculus OX=10090 GN=Rel PE=1 SV=2	0	0	0	1	0	0	0.70922
P15532_K124	Nme1	NIIHGSDSVK*SAEK	NDKA_MOUSE Nucleoside diphosphate kinase A OS=Mus musculus OX=10090 GN=Nme1 PE=1 SV=1	0	0	1	0	3	4	1.14105
P15864_K110	H1-2	K*AASGEAKPQAK	H12_MOUSE Histone H1.2 OS=Mus musculus OX=10090 GN=H1-2 PE=1 SV=2	0	0	1	2	2	0	1.07018
P15864_K117	H1-2	AASGEAK*PQAK	H12_MOUSE Histone H1.2 OS=Mus musculus OX=10090 GN=H1-2 PE=1 SV=2	0	0	0	2	2	1	1.07593
P15864_K121	H1-2	AASGEAKPQAK*K	H12_MOUSE Histone H1.2 OS=Mus musculus OX=10090 GN=H1-2 PE=1 SV=2	0	0	1	0	2	1	1.30818
P16045_K19	Lgals1	LKPGECLK*VR	LEG1_MOUSE Galectin-1 OS=Mus musculus OX=10090 GN=Lgals1 PE=1 SV=3	0	0	0	4	3	5	1.06135
P16045_K29	Lgals1	GEVASDAK*SFVLNLGK	LEG1_MOUSE Galectin-1 OS=Mus musculus OX=10090 GN=Lgals1 PE=1 SV=3	0	0	1	0	0	0	1.0101
P16110_K210	Lgals3	QSAFPFESGK*PFK	LEG3_MOUSE Galectin-3 OS=Mus musculus OX=10090 GN=Lgals3 PE=1 SV=3	0	0	0	0	0	1	0.84746
P16858_K111	Gapdh	AGAHLK*GGAK	G3P_MOUSE Glyceraldehyde-3-phosphate dehydrogenase OS=Mus musculus OX=10090 GN=Gapdh PE=1 SV=2	0	0	2	3	6	6	0.967661
P16858_K192	Gapdh	TVDGPSGK*LWR	G3P_MOUSE Glyceraldehyde-3-phosphate dehydrogenase OS=Mus musculus OX=10090 GN=Gapdh PE=1 SV=2	0	0	1	5	6	5	1.03548
P16858_K213	Gapdh	GAAQNIIPASTGAAK*AVGK	G3P_MOUSE Glyceraldehyde-3-phosphate dehydrogenase OS=Mus musculus OX=10090 GN=Gapdh PE=1 SV=2	0	3	3	6	6	6	1.02735
P16858_K217	Gapdh	AVGK*VIPELNGK	G3P_MOUSE Glyceraldehyde-3-phosphate dehydrogenase OS=Mus musculus OX=10090 GN=Gapdh PE=1 SV=2	0	2	6	6	6	5	1.0732
P16858_K249	Gapdh	LEK*PAK	G3P_MOUSE Glyceraldehyde-3-phosphate dehydrogenase OS=Mus musculus OX=10090 GN=Gapdh PE=1 SV=2	0	2	2	6	6	6	0.963399
P16858_K252	Gapdh	LEKPAK*YDDIKK LEKPAK*YDDIK	G3P_MOUSE Glyceraldehyde-3-phosphate dehydrogenase OS=Mus musculus OX=10090 GN=Gapdh PE=1 SV=2	0	0	0	0	6	1	1.0473
P16858_K257	Gapdh	YDDIK*K	G3P_MOUSE Glyceraldehyde-3-phosphate dehydrogenase OS=Mus musculus OX=10090 GN=Gapdh PE=1 SV=2	0	1	0	6	6	6	0.955003
P16858_K261	Gapdh	VVK*QASEGPLK	G3P_MOUSE Glyceraldehyde-3-phosphate dehydrogenase OS=Mus musculus OX=10090 GN=Gapdh PE=1 SV=2	0	2	6	6	6	6	1.01934
P16858_K3	Gapdh	VK*VGVNGFGR	G3P_MOUSE Glyceraldehyde-3-phosphate dehydrogenase OS=Mus musculus OX=10090 GN=Gapdh PE=1 SV=2	3	0	3	2	2	5	0.997241
P16858_K64	Gapdh	AENGK*LVINGK	G3P_MOUSE Glyceraldehyde-3-phosphate dehydrogenase OS=Mus musculus OX=10090 GN=Gapdh PE=1 SV=2	0	0	0	0	0	1	1
P16858_K70	Gapdh	LVINGK*PITIFQER	G3P_MOUSE Glyceraldehyde-3-phosphate dehydrogenase OS=Mus musculus OX=10090 GN=Gapdh PE=1 SV=2	0	0	2	0	0	0	1.04212
P17095_K15	Hmga1	SSQPLASK*QEK	HMGA1_MOUSE High mobility group protein HMG-I/HMG-Y OS=Mus musculus OX=10090 GN=Hmga1 PE=1 SV=4	0	0	2	3	0	0	1.11152
P17095_K74	Hmga1	K*VTTAPGR	HMGA1_MOUSE High mobility group protein HMG-I/HMG-Y OS=Mus musculus OX=10090 GN=Hmga1 PE=1 SV=4	0	0	0	3	0	1	1.22796
P17156_K57	Hspa2	LIGDAAK*NQVAMNPTNTIFDAK	HSP72_MOUSE Heat shock-related 70 kDa protein 2 OS=Mus musculus OX=10090 GN=Hspa2 PE=1 SV=2	0	0	0	0	1	0	1.0989
P17182_K197	Eno1	NVIK*EK	ENOA_MOUSE Alpha-enolase OS=Mus musculus OX=10090 GN=Eno1 PE=1 SV=3	0	0	0	1	2	0	1.09759
P17182_K228	Eno1	EALELLK*TAIAK	ENOA_MOUSE Alpha-enolase OS=Mus musculus OX=10090 GN=Eno1 PE=1 SV=3	0	0	0	0	2	0	0.92878
P17182_K330	Eno1	IAK*AASEK	ENOA_MOUSE Alpha-enolase OS=Mus musculus OX=10090 GN=Eno1 PE=1 SV=3	0	1	2	6	6	6	1.07584
P17182_K420	Eno1	IEEELGSK*AK	ENOA_MOUSE Alpha-enolase OS=Mus musculus OX=10090 GN=Eno1 PE=1 SV=3	0	0	0	1	4	4	0.80806
P17182_K60	Eno1	FMGK*GVSQAVEHINK	ENOA_MOUSE Alpha-enolase OS=Mus musculus OX=10090 GN=Eno1 PE=1 SV=3	0	0	1	0	0	0	1
P17182_K71	Eno1	GVSQAVEHINK*TIAPALVSK	ENOA_MOUSE Alpha-enolase OS=Mus musculus OX=10090 GN=Eno1 PE=1 SV=3	0	0	0	0	0	1	1.0101
P17182_K80	Eno1	TIAPALVSK*K	ENOA_MOUSE Alpha-enolase OS=Mus musculus OX=10090 GN=Eno1 PE=1 SV=3	0	0	0	6	4	6	0.987534
P17182_K81	Eno1	K*VNVVEQEK	ENOA_MOUSE Alpha-enolase OS=Mus musculus OX=10090 GN=Eno1 PE=1 SV=3	0	0	2	3	2	0	0.958953
P17182_K89	Eno1	KVNVVEQEK*IDK	ENOA_MOUSE Alpha-enolase OS=Mus musculus OX=10090 GN=Eno1 PE=1 SV=3	0	0	3	3	6	4	1.03905
P17225_K265	Ptbp1	LTSLNVK*YNNDK	PTBP1_MOUSE Polypyrimidine tract-binding protein 1 OS=Mus musculus OX=10090 GN=Ptbp1 PE=1 SV=2	0	0	0	0	0	1	1.38889
P17225_K270	Ptbp1	YNNDK*SR	PTBP1_MOUSE Polypyrimidine tract-binding protein 1 OS=Mus musculus OX=10090 GN=Ptbp1 PE=1 SV=2	0	0	0	0	1	0	0.81967
P17225_K485	Ptbp1	FFQK*DR	PTBP1_MOUSE Polypyrimidine tract-binding protein 1 OS=Mus musculus OX=10090 GN=Ptbp1 PE=1 SV=2	0	0	0	0	0	1	0.68493
P17427_K26	Ap2a2	SK*EAEIK	AP2A2_MOUSE AP-2 complex subunit alpha-2 OS=Mus musculus OX=10090 GN=Ap2a2 PE=1 SV=2	0	0	0	0	1	0	1
P17710_K833	Hk1	GQISEPLK*TR	HXK1_MOUSE Hexokinase-1 OS=Mus musculus OX=10090 GN=Hk1 PE=1 SV=3	0	0	0	0	0	2	1.02697
P17742_K125	Ppia	TEWLDGK*HVVFGK	PPIA_MOUSE Peptidyl-prolyl cis-trans isomerase A OS=Mus musculus OX=10090 GN=Ppia PE=1 SV=2	0	0	4	2	5	6	1.1166
P17742_K133	Ppia	VK*EGMNIVEAMER	PPIA_MOUSE Peptidyl-prolyl cis-trans isomerase A OS=Mus musculus OX=10090 GN=Ppia PE=1 SV=2	0	0	3	0	0	2	1.12704
P17742_K28	Ppia	VSFELFADK*VPK	PPIA_MOUSE Peptidyl-prolyl cis-trans isomerase A OS=Mus musculus OX=10090 GN=Ppia PE=1 SV=2	0	6	2	6	6	2	1.02576
P17742_K31	Ppia	VSFELFADKVPK*TAENFR	PPIA_MOUSE Peptidyl-prolyl cis-trans isomerase A OS=Mus musculus OX=10090 GN=Ppia PE=1 SV=2	0	0	1	2	2	1	1.0379
P17742_K44	Ppia	ALSTGEK*GFGYK	PPIA_MOUSE Peptidyl-prolyl cis-trans isomerase A OS=Mus musculus OX=10090 GN=Ppia PE=1 SV=2	0	0	5	6	6	5	0.97171
P17742_K82	Ppia	SIYGEK*FEDENFILK	PPIA_MOUSE Peptidyl-prolyl cis-trans isomerase A OS=Mus musculus OX=10090 GN=Ppia PE=1 SV=2	0	0	2	0	3	0	1.00011
P17751_K156	Tpi1	VIADNVK*DWSK	TPIS_MOUSE Triosephosphate isomerase OS=Mus musculus OX=10090 GN=Tpi1 PE=1 SV=5	0	0	0	0	1	1	1.14379
P17751_K175	Tpi1	VVLAYEPVWAIGTGK*TATPQQAQEVHEK	TPIS_MOUSE Triosephosphate isomerase OS=Mus musculus OX=10090 GN=Tpi1 PE=1 SV=5	0	0	1	2	0	0	1.07152
P17751_K188	Tpi1	TATPQQAQEVHEK*LR	TPIS_MOUSE Triosephosphate isomerase OS=Mus musculus OX=10090 GN=Tpi1 PE=1 SV=5	0	0	0	0	4	3	1.1204
P17751_K194	Tpi1	GWLK*SNVNDGVAQSTR	TPIS_MOUSE Triosephosphate isomerase OS=Mus musculus OX=10090 GN=Tpi1 PE=1 SV=5	0	0	0	0	1	0	0.84034
P17918_K80	Pcna	ILK*CAGNEDIITLR	PCNA_MOUSE Proliferating cell nuclear antigen OS=Mus musculus OX=10090 GN=Pcna PE=1 SV=2	0	0	2	2	0	2	1.15621
P18155_K341	Mthfd2	VLRPEELEVFK*SK	MTDC_MOUSE Bifunctional methylenetetrahydrofolate dehydrogenase/cyclohydrolase, mitochondrial OS=Mus musculus OX=10090 GN=Mthfd2 PE=1 SV=1	0	0	0	0	4	1	1.09378
P18760_K132	Cfl1	LTGIK*HELQANCYEEVK	COF1_MOUSE Cofilin-1 OS=Mus musculus OX=10090 GN=Cfl1 PE=1 SV=3	0	0	0	0	5	0	1.00375
P18760_K144	Cfl1	HELQANCYEEVK*DR	COF1_MOUSE Cofilin-1 OS=Mus musculus OX=10090 GN=Cfl1 PE=1 SV=3	0	0	2	2	6	6	1.07356
P18760_K152	Cfl1	CTLAEK*LGGSAVISLEGKPL	COF1_MOUSE Cofilin-1 OS=Mus musculus OX=10090 GN=Cfl1 PE=1 SV=3	0	0	2	0	0	0	1.14905
P18760_K19	Cfl1	VFNDMK*VR	COF1_MOUSE Cofilin-1 OS=Mus musculus OX=10090 GN=Cfl1 PE=1 SV=3	0	0	0	6	2	6	1.03574
P18760_K22	Cfl1	K*SSTPEEVK	COF1_MOUSE Cofilin-1 OS=Mus musculus OX=10090 GN=Cfl1 PE=1 SV=3	0	0	3	5	5	6	0.9531
P18760_K30	Cfl1	SSTPEEVK*K	COF1_MOUSE Cofilin-1 OS=Mus musculus OX=10090 GN=Cfl1 PE=1 SV=3	0	0	0	4	1	2	1.13579
P18760_K44	Cfl1	AVLFCLSEDK*K	COF1_MOUSE Cofilin-1 OS=Mus musculus OX=10090 GN=Cfl1 PE=1 SV=3	0	0	0	4	5	4	0.85905
P18760_K45	Cfl1	K*NIILEEGK	COF1_MOUSE Cofilin-1 OS=Mus musculus OX=10090 GN=Cfl1 PE=1 SV=3	0	0	0	0	2	4	1.20688
P18760_K78	Cfl1	MLPDK*DCR	COF1_MOUSE Cofilin-1 OS=Mus musculus OX=10090 GN=Cfl1 PE=1 SV=3	0	0	0	0	5	5	1.11825
P18760_K92	Cfl1	YALYDATYETK*ESK	COF1_MOUSE Cofilin-1 OS=Mus musculus OX=10090 GN=Cfl1 PE=1 SV=3	0	0	0	0	2	0	0.988475
P19096_K1152	Fasn	ALQTK*ATQQGLK	FAS_MOUSE Fatty acid synthase OS=Mus musculus OX=10090 GN=Fasn PE=1 SV=2	0	0	0	3	6	4	0.991822
P19096_K1516	Fasn	HFQLEQDK*PK	FAS_MOUSE Fatty acid synthase OS=Mus musculus OX=10090 GN=Fasn PE=1 SV=2	0	0	0	0	1	1	1.15316
P19096_K673	Fasn	QEGVFAK*EVR	FAS_MOUSE Fatty acid synthase OS=Mus musculus OX=10090 GN=Fasn PE=1 SV=2	0	0	0	0	0	4	0.835323
P19253_K103	Rpl13a	LK*VLDGIPPPYDK	RL13A_MOUSE 60S ribosomal protein L13a OS=Mus musculus OX=10090 GN=Rpl13a PE=1 SV=4	0	0	2	0	0	3	1.02
P19253_K191	Rpl13a	ICK*FTEVLK	RL13A_MOUSE 60S ribosomal protein L13a OS=Mus musculus OX=10090 GN=Rpl13a PE=1 SV=4	0	0	4	3	2	1	1.03345
P20029_K124	Hspa5	K*TKPYIQVDIGGGQTK	BIP_MOUSE Endoplasmic reticulum chaperone BiP OS=Mus musculus OX=10090 GN=Hspa5 PE=1 SV=3	0	0	1	0	0	0	1.03093
P20029_K186	Hspa5	QATK*DAGTIAGLNVMR	BIP_MOUSE Endoplasmic reticulum chaperone BiP OS=Mus musculus OX=10090 GN=Hspa5 PE=1 SV=3	0	0	1	0	0	0	1
P20029_K214	Hspa5	IINEPTAAAIAYGLDK*R	BIP_MOUSE Endoplasmic reticulum chaperone BiP OS=Mus musculus OX=10090 GN=Hspa5 PE=1 SV=3	0	0	0	1	0	0	1
P20029_K327	Hspa5	AK*FEELNMDLFR	BIP_MOUSE Endoplasmic reticulum chaperone BiP OS=Mus musculus OX=10090 GN=Hspa5 PE=1 SV=3	0	0	3	0	2	1	0.866233
P20029_K341	Hspa5	STMK*PVQK	BIP_MOUSE Endoplasmic reticulum chaperone BiP OS=Mus musculus OX=10090 GN=Hspa5 PE=1 SV=3	0	0	0	0	0	1	1.07527
P20029_K371	Hspa5	IPK*IQQLVK	BIP_MOUSE Endoplasmic reticulum chaperone BiP OS=Mus musculus OX=10090 GN=Hspa5 PE=1 SV=3	0	0	1	0	1	2	1.07283
P20029_K447	Hspa5	NTVVPTK*K	BIP_MOUSE Endoplasmic reticulum chaperone BiP OS=Mus musculus OX=10090 GN=Hspa5 PE=1 SV=3	0	0	0	0	0	1	0.9434
P20029_K448	Hspa5	K*SQIFSTASDNQPTVTIK	BIP_MOUSE Endoplasmic reticulum chaperone BiP OS=Mus musculus OX=10090 GN=Hspa5 PE=1 SV=3	0	0	1	0	0	0	0.93025
P20029_K517	Hspa5	VTAEDK*GTGNK	BIP_MOUSE Endoplasmic reticulum chaperone BiP OS=Mus musculus OX=10090 GN=Hspa5 PE=1 SV=3	0	0	1	5	2	4	1.01939
P20029_K522	Hspa5	GTGNK*NK	BIP_MOUSE Endoplasmic reticulum chaperone BiP OS=Mus musculus OX=10090 GN=Hspa5 PE=1 SV=3	0	0	0	0	1	0	1.04167
P20029_K524	Hspa5	NK*ITITNDQNR	BIP_MOUSE Endoplasmic reticulum chaperone BiP OS=Mus musculus OX=10090 GN=Hspa5 PE=1 SV=3	0	0	2	0	1	1	0.98721
P20029_K580	Hspa5	NQIGDK*EK	BIP_MOUSE Endoplasmic reticulum chaperone BiP OS=Mus musculus OX=10090 GN=Hspa5 PE=1 SV=3	0	0	0	1	1	0	0.881895
P20029_K621	Hspa5	K*KELEEIVQPIISK	BIP_MOUSE Endoplasmic reticulum chaperone BiP OS=Mus musculus OX=10090 GN=Hspa5 PE=1 SV=3	0	0	2	0	0	1	0.798617
P20029_K622	Hspa5	KK*ELEEIVQPIISK	BIP_MOUSE Endoplasmic reticulum chaperone BiP OS=Mus musculus OX=10090 GN=Hspa5 PE=1 SV=3	0	0	2	6	0	4	1.09025
P20029_K82	Hspa5	LIGDAAK*NQLTSNPENTVFDAK	BIP_MOUSE Endoplasmic reticulum chaperone BiP OS=Mus musculus OX=10090 GN=Hspa5 PE=1 SV=3	0	0	6	4	4	2	1.11955
P20152_K120	Vim	FANYIDK*VR	VIME_MOUSE Vimentin OS=Mus musculus OX=10090 GN=Vim PE=1 SV=3	0	0	0	1	1	0	1.37362
P20152_K139	Vim	ILLAELEQLK*GQGK	VIME_MOUSE Vimentin OS=Mus musculus OX=10090 GN=Vim PE=1 SV=3	0	0	2	2	1	0	1.00819
P20152_K143	Vim	GQGK*SR	VIME_MOUSE Vimentin OS=Mus musculus OX=10090 GN=Vim PE=1 SV=3	0	0	0	1	0	0	1.47059
P20152_K223	Vim	K*VESLQEEIAFLK	VIME_MOUSE Vimentin OS=Mus musculus OX=10090 GN=Vim PE=1 SV=3	0	0	0	1	3	1	1.04998
P20152_K294	Vim	SK*FADLSEAANR	VIME_MOUSE Vimentin OS=Mus musculus OX=10090 GN=Vim PE=1 SV=3	0	0	5	0	0	1	0.992553
P20152_K313	Vim	QAK*QESNEYR	VIME_MOUSE Vimentin OS=Mus musculus OX=10090 GN=Vim PE=1 SV=3	0	0	1	0	0	0	1.02041
P20152_K439	Vim	ETNLESLPLVDTHSK*R	VIME_MOUSE Vimentin OS=Mus musculus OX=10090 GN=Vim PE=1 SV=3	0	0	0	0	2	3	1
P20491_K80	Fcer1g	SQETYETLK*HEKPPQ	FCERG_MOUSE High affinity immunoglobulin epsilon receptor subunit gamma OS=Mus musculus OX=10090 GN=Fcer1g PE=1 SV=1	0	0	0	0	3	0	0.950913
P21107_K113	Tpm3	LATALQK*LEEAEK	TPM3_MOUSE Tropomyosin alpha-3 chain OS=Mus musculus OX=10090 GN=Tpm3 PE=1 SV=3	0	0	2	4	4	0	1.14165
P21107_K137	Tpm3	ALK*DEEK	TPM3_MOUSE Tropomyosin alpha-3 chain OS=Mus musculus OX=10090 GN=Tpm3 PE=1 SV=3	0	0	0	3	6	5	0.987
P21107_K150	Tpm3	MEIQEIQLK*EAK	TPM3_MOUSE Tropomyosin alpha-3 chain OS=Mus musculus OX=10090 GN=Tpm3 PE=1 SV=3	0	0	0	3	4	4	1.12929
P21107_K153	Tpm3	EAK*HIAEEADR	TPM3_MOUSE Tropomyosin alpha-3 chain OS=Mus musculus OX=10090 GN=Tpm3 PE=1 SV=3	0	0	0	0	1	0	1.06383
P21107_K162	Tpm3	HIAEEADRK*YEEVAR	TPM3_MOUSE Tropomyosin alpha-3 chain OS=Mus musculus OX=10090 GN=Tpm3 PE=1 SV=3	0	0	0	0	1	0	0.93458
P21107_K218	Tpm3	YSQK*EDKYEEEIK	TPM3_MOUSE Tropomyosin alpha-3 chain OS=Mus musculus OX=10090 GN=Tpm3 PE=1 SV=3	0	0	3	2	4	1	1.05494
P21107_K221	Tpm3	YSQKEDK*YEEEIK	TPM3_MOUSE Tropomyosin alpha-3 chain OS=Mus musculus OX=10090 GN=Tpm3 PE=1 SV=3	0	0	0	0	1	0	1.21951
P21107_K249	Tpm3	SVAK*LEK	TPM3_MOUSE Tropomyosin alpha-3 chain OS=Mus musculus OX=10090 GN=Tpm3 PE=1 SV=3	0	0	0	3	5	5	1.03095
P21619_K173	Lmnb2	AEDGHAVAK*K	LMNB2_MOUSE Lamin-B2 OS=Mus musculus OX=10090 GN=Lmnb2 PE=1 SV=2	0	0	0	0	2	0	1.01546
P21855_K14	Cd72	FVK*VPLK	CD72_MOUSE B-cell differentiation antigen CD72 OS=Mus musculus OX=10090 GN=Cd72 PE=1 SV=2	0	0	0	0	0	1	0.9901
P23116_K23	Eif3a	ANEFLEVGK*K	EIF3A_MOUSE Eukaryotic translation initiation factor 3 subunit A OS=Mus musculus OX=10090 GN=Eif3a PE=1 SV=5	0	0	0	0	0	1	1.36986
P23116_K632	Eif3a	ILQEHEQIK*K	EIF3A_MOUSE Eukaryotic translation initiation factor 3 subunit A OS=Mus musculus OX=10090 GN=Eif3a PE=1 SV=5	0	0	0	0	5	2	0.984941
P23116_K651	Eif3a	TELGAK*AFK	EIF3A_MOUSE Eukaryotic translation initiation factor 3 subunit A OS=Mus musculus OX=10090 GN=Eif3a PE=1 SV=5	0	0	0	0	0	1	1.38889
P23116_K694	Eif3a	K*IDYFER	EIF3A_MOUSE Eukaryotic translation initiation factor 3 subunit A OS=Mus musculus OX=10090 GN=Eif3a PE=1 SV=5	0	0	4	5	1	4	0.987187
P23198_K10	Cbx3	TTLQK*MGK	CBX3_MOUSE Chromobox protein homolog 3 OS=Mus musculus OX=10090 GN=Cbx3 PE=1 SV=2	0	0	0	0	5	0	1.24861
P23249_K148	Mov10	K*EVLTLR	MOV10_MOUSE Putative helicase MOV-10 OS=Mus musculus OX=10090 GN=Mov10 PE=1 SV=2	0	0	1	1	0	2	1.05547
P24288_K28	Bcat1	AK*DLIITPATVLK	BCAT1_MOUSE Branched-chain-amino-acid aminotransferase, cytosolic OS=Mus musculus OX=10090 GN=Bcat1 PE=1 SV=2	0	0	0	0	0	2	0.93514
P24369_K116	Ppib	GDGTGGK*SIYGER	PPIB_MOUSE Peptidyl-prolyl cis-trans isomerase B OS=Mus musculus OX=10090 GN=Ppib PE=1 SV=2	0	0	2	0	1	1	1.01954
P24369_K186	Ppib	KVESTK*TDSR	PPIB_MOUSE Peptidyl-prolyl cis-trans isomerase B OS=Mus musculus OX=10090 GN=Ppib PE=1 SV=2	0	0	1	0	0	0	0.92593
P24369_K209	Ppib	IEVEK*PFAIAK	PPIB_MOUSE Peptidyl-prolyl cis-trans isomerase B OS=Mus musculus OX=10090 GN=Ppib PE=1 SV=2	0	0	0	0	0	1	0.9901
P24369_K215	Ppib	IEVEKPFAIAK*E	PPIB_MOUSE Peptidyl-prolyl cis-trans isomerase B OS=Mus musculus OX=10090 GN=Ppib PE=1 SV=2	0	0	1	0	0	2	1.15497
P24452_K28	Capg	VEK*LKPVPIAR	CAPG_MOUSE Macrophage-capping protein OS=Mus musculus OX=10090 GN=Capg PE=1 SV=2	0	0	3	6	6	6	0.966262
P24452_K30	Capg	VEKLK*PVPIAR	CAPG_MOUSE Macrophage-capping protein OS=Mus musculus OX=10090 GN=Capg PE=1 SV=2	0	0	1	0	0	0	1.0989
P24452_K308	Capg	KANEK*ER	CAPG_MOUSE Macrophage-capping protein OS=Mus musculus OX=10090 GN=Capg PE=1 SV=2	0	0	0	0	1	3	1.08993
P24547_K134	Impdh2	DVFEAK*AR	IMDH2_MOUSE Inosine-5'-monophosphate dehydrogenase 2 OS=Mus musculus OX=10090 GN=Impdh2 PE=1 SV=2	0	0	0	5	0	6	1.04909
P24547_K422	Impdh2	GMGSLDAMDK*HLSSQNR	IMDH2_MOUSE Inosine-5'-monophosphate dehydrogenase 2 OS=Mus musculus OX=10090 GN=Impdh2 PE=1 SV=2	0	0	0	0	4	0	1.00304
P24547_K436	Impdh2	YFSEADK*IK	IMDH2_MOUSE Inosine-5'-monophosphate dehydrogenase 2 OS=Mus musculus OX=10090 GN=Impdh2 PE=1 SV=2	0	0	0	3	5	3	1.04032
P24547_K438	Impdh2	IK*VAQGVSGAVQDK	IMDH2_MOUSE Inosine-5'-monophosphate dehydrogenase 2 OS=Mus musculus OX=10090 GN=Impdh2 PE=1 SV=2	0	0	0	0	1	3	1.1014
P24547_K511	Impdh2	TSSAQVEGGVHSLHSYEK*R	IMDH2_MOUSE Inosine-5'-monophosphate dehydrogenase 2 OS=Mus musculus OX=10090 GN=Impdh2 PE=1 SV=2	0	0	0	0	5	4	0.953008
P25206_K247	Mcm3	CLPGK*K	MCM3_MOUSE DNA replication licensing factor MCM3 OS=Mus musculus OX=10090 GN=Mcm3 PE=1 SV=2	0	0	0	0	0	1	0.8547
P25444_K263	Rps2	ETVFTK*SPYQEFTDHLVK	RS2_MOUSE 40S ribosomal protein S2 OS=Mus musculus OX=10090 GN=Rps2 PE=1 SV=3	0	0	1	0	0	0	0.93458
P25976_K284	Ubtf	STLTK*AER	UBF1_MOUSE Nucleolar transcription factor 1 OS=Mus musculus OX=10090 GN=Ubtf PE=1 SV=1	0	0	0	0	2	0	1.4505
P26039_K1221	Tln1	AVGDASK*R	TLN1_MOUSE Talin-1 OS=Mus musculus OX=10090 GN=Tln1 PE=1 SV=2	0	0	0	2	0	4	1.00472
P26039_K1544	Tln1	TIK*ALDGDFTEENR	TLN1_MOUSE Talin-1 OS=Mus musculus OX=10090 GN=Tln1 PE=1 SV=2	0	0	0	0	0	1	0.97087
P26039_K1948	Tln1	K*ELIECAR	TLN1_MOUSE Talin-1 OS=Mus musculus OX=10090 GN=Tln1 PE=1 SV=2	0	0	6	4	0	6	0.986223
P26039_K2021	Tln1	EGILK*TAK	TLN1_MOUSE Talin-1 OS=Mus musculus OX=10090 GN=Tln1 PE=1 SV=2	0	0	0	0	0	2	1.2353
P26039_K2024	Tln1	TAK*VLVEDTK	TLN1_MOUSE Talin-1 OS=Mus musculus OX=10090 GN=Tln1 PE=1 SV=2	0	0	2	2	0	2	1.01839
P26039_K2031	Tln1	VLVEDTK*VLVQNAAGSQEK	TLN1_MOUSE Talin-1 OS=Mus musculus OX=10090 GN=Tln1 PE=1 SV=2	0	0	2	4	1	1	1.06086
P26039_K2099	Tln1	ALGDLISATK*AAAGK	TLN1_MOUSE Talin-1 OS=Mus musculus OX=10090 GN=Tln1 PE=1 SV=2	0	0	4	6	5	2	1.11077
P26039_K2115	Tln1	VGDDPAVWQLK*NSAK	TLN1_MOUSE Talin-1 OS=Mus musculus OX=10090 GN=Tln1 PE=1 SV=2	0	0	2	0	1	1	1.1846
P26039_K2133	Tln1	TVK*AVEDEATK	TLN1_MOUSE Talin-1 OS=Mus musculus OX=10090 GN=Tln1 PE=1 SV=2	0	0	4	4	3	3	1.0162
P26039_K2322	Tln1	K*LEQLKPR	TLN1_MOUSE Talin-1 OS=Mus musculus OX=10090 GN=Tln1 PE=1 SV=2	0	0	0	1	1	1	0.904553
P26039_K2531	Tln1	QQQYK*FLPSELR	TLN1_MOUSE Talin-1 OS=Mus musculus OX=10090 GN=Tln1 PE=1 SV=2	0	0	0	0	0	2	1.30952
P26039_K428	Tln1	K*STVLQQQYNR	TLN1_MOUSE Talin-1 OS=Mus musculus OX=10090 GN=Tln1 PE=1 SV=2	0	0	2	0	0	0	1.06976
P26039_K687	Tln1	AK*SVAQR	TLN1_MOUSE Talin-1 OS=Mus musculus OX=10090 GN=Tln1 PE=1 SV=2	0	0	2	5	0	4	1.00944
P26039_K910	Tln1	MATNAAAQNAIK*K	TLN1_MOUSE Talin-1 OS=Mus musculus OX=10090 GN=Tln1 PE=1 SV=2	0	0	2	5	4	5	1.04078
P26041_K139	Msn	YGDFNK*EVHK	MOES_MOUSE Moesin OS=Mus musculus OX=10090 GN=Msn PE=1 SV=3	0	0	0	0	6	0	0.940533
P26041_K151	Msn	SGYLAGDK*LLPQR	MOES_MOUSE Moesin OS=Mus musculus OX=10090 GN=Msn PE=1 SV=3	0	0	0	0	0	2	0.8967
P26041_K162	Msn	VLEQHK*LNK	MOES_MOUSE Moesin OS=Mus musculus OX=10090 GN=Msn PE=1 SV=3	0	0	0	0	5	0	1.00556
P26041_K3	Msn	PK*TISVR	MOES_MOUSE Moesin OS=Mus musculus OX=10090 GN=Msn PE=1 SV=3	0	0	0	0	0	3	0.956737
P26041_K327	Msn	ALLENEK*K	MOES_MOUSE Moesin OS=Mus musculus OX=10090 GN=Msn PE=1 SV=3	0	0	0	2	0	3	0.853258
P26041_K352	Msn	LK*QIEEQTK	MOES_MOUSE Moesin OS=Mus musculus OX=10090 GN=Msn PE=1 SV=3	0	0	0	1	1	3	1.26612
P26041_K360	Msn	K*AQQELEEQTR	MOES_MOUSE Moesin OS=Mus musculus OX=10090 GN=Msn PE=1 SV=3	0	0	0	1	0	2	0.91662
P26041_K388	Msn	AQSEAEK*LAK	MOES_MOUSE Moesin OS=Mus musculus OX=10090 GN=Msn PE=1 SV=3	0	0	0	4	5	6	1.15767
P26041_K400	Msn	ERQEAEEAK*EALLQASR	MOES_MOUSE Moesin OS=Mus musculus OX=10090 GN=Msn PE=1 SV=3	0	0	1	0	2	4	1.45619
P26041_K412	Msn	K*TQEQLASEMAELTAR	MOES_MOUSE Moesin OS=Mus musculus OX=10090 GN=Msn PE=1 SV=3	0	0	5	0	0	4	1.02938
P26041_K538	Msn	K*TANDMIHAENMR	MOES_MOUSE Moesin OS=Mus musculus OX=10090 GN=Msn PE=1 SV=3	0	0	0	0	0	1	1.19765
P26041_K72	Msn	K*ESPLLFK	MOES_MOUSE Moesin OS=Mus musculus OX=10090 GN=Msn PE=1 SV=3	0	0	0	0	0	2	0.9224
P26043_K435	Rdx	IALLEEAK*K	RADI_MOUSE Radixin OS=Mus musculus OX=10090 GN=Rdx PE=1 SV=3	0	0	0	0	0	4	0.950392
P26443_K187	Glud1	AGVK*INPK	DHE3_MOUSE Glutamate dehydrogenase 1, mitochondrial OS=Mus musculus OX=10090 GN=Glud1 PE=1 SV=1	0	0	0	0	1	1	1.24035
P26443_K480	Glud1	FGK*HGGTIPVVPTAEFQDR	DHE3_MOUSE Glutamate dehydrogenase 1, mitochondrial OS=Mus musculus OX=10090 GN=Glud1 PE=1 SV=1	0	0	1	0	4	2	1.15122
P26443_K503	Glud1	ISGASEK*DIVHSGLAYTMER	DHE3_MOUSE Glutamate dehydrogenase 1, mitochondrial OS=Mus musculus OX=10090 GN=Glud1 PE=1 SV=1	0	0	0	0	1	0	0.93458
P26516_K180	Psmd7	DIK*DTTVGTLSQR	PSMD7_MOUSE 26S proteasome non-ATPase regulatory subunit 7 OS=Mus musculus OX=10090 GN=Psmd7 PE=1 SV=2	0	0	1	1	1	6	1.03231
P26516_K214	Psmd7	SYLEK*VASGK	PSMD7_MOUSE 26S proteasome non-ATPase regulatory subunit 7 OS=Mus musculus OX=10090 GN=Psmd7 PE=1 SV=2	0	0	0	0	6	0	1.05806
P27546_K1033	Map4	IESQK*LNFK	MAP4_MOUSE Microtubule-associated protein 4 OS=Mus musculus OX=10090 GN=Map4 PE=1 SV=3	0	0	0	0	1	0	0.79365
P27546_K919	Map4	VGSTENIK*HQPGGGR	MAP4_MOUSE Microtubule-associated protein 4 OS=Mus musculus OX=10090 GN=Map4 PE=1 SV=3	0	0	0	0	2	0	0.905445
P27601_K363	Gna13	DVK*DTILHDNLK	GNA13_MOUSE Guanine nucleotide-binding protein subunit alpha-13 OS=Mus musculus OX=10090 GN=Gna13 PE=1 SV=1	0	0	0	0	0	4	0.976555
P27659_K294	Rpl3	IGQGYLIK*DGK	RL3_MOUSE 60S ribosomal protein L3 OS=Mus musculus OX=10090 GN=Rpl3 PE=1 SV=3	0	0	0	1	1	1	1.17304
P27659_K362	Rpl3	ALEK*IDLK	RL3_MOUSE 60S ribosomal protein L3 OS=Mus musculus OX=10090 GN=Rpl3 PE=1 SV=3	0	0	0	0	0	2	0.952725
P27659_K366	Rpl3	IDLK*FIDTTSK	RL3_MOUSE 60S ribosomal protein L3 OS=Mus musculus OX=10090 GN=Rpl3 PE=1 SV=3	0	0	5	3	4	1	1.05274
P27661_K120	H2ax	K*SSATVGPK	H2AX_MOUSE Histone H2AX OS=Mus musculus OX=10090 GN=H2ax PE=1 SV=2	0	0	1	1	0	0	1.40214
P27661_K128	H2ax	SSATVGPK*APAVGK	H2AX_MOUSE Histone H2AX OS=Mus musculus OX=10090 GN=H2ax PE=1 SV=2	0	0	1	0	0	4	0.965194
P27661_K134	H2ax	APAVGK*K	H2AX_MOUSE Histone H2AX OS=Mus musculus OX=10090 GN=H2ax PE=1 SV=2	0	0	0	6	1	6	1.00364
P27661_K37	H2ax	K*GHYAER	H2AX_MOUSE Histone H2AX OS=Mus musculus OX=10090 GN=H2ax PE=1 SV=2	0	0	2	5	0	1	1.08324
P27773_K129	Pdia3	TADGIVSHLK*K	PDIA3_MOUSE Protein disulfide-isomerase A3 OS=Mus musculus OX=10090 GN=Pdia3 PE=1 SV=2	0	0	0	0	4	5	1.08793
P27773_K130	Pdia3	K*QAGPASVPLR	PDIA3_MOUSE Protein disulfide-isomerase A3 OS=Mus musculus OX=10090 GN=Pdia3 PE=1 SV=2	0	0	2	0	0	0	1.09836
P27773_K173	Pdia3	DLFSDGHSEFLK*AASNLR	PDIA3_MOUSE Protein disulfide-isomerase A3 OS=Mus musculus OX=10090 GN=Pdia3 PE=1 SV=2	0	0	0	0	0	1	0.98824
P27773_K214	Pdia3	PLHLANK*FEDK	PDIA3_MOUSE Protein disulfide-isomerase A3 OS=Mus musculus OX=10090 GN=Pdia3 PE=1 SV=2	0	0	0	0	6	5	1.12185
P27773_K218	Pdia3	FEDK*TVAYTEK	PDIA3_MOUSE Protein disulfide-isomerase A3 OS=Mus musculus OX=10090 GN=Pdia3 PE=1 SV=2	0	0	0	0	0	1	0.96065
P27773_K231	Pdia3	MTSGK*IK	PDIA3_MOUSE Protein disulfide-isomerase A3 OS=Mus musculus OX=10090 GN=Pdia3 PE=1 SV=2	0	0	0	0	0	1	0.75758
P27773_K289	Pdia3	K*FLDAGHK	PDIA3_MOUSE Protein disulfide-isomerase A3 OS=Mus musculus OX=10090 GN=Pdia3 PE=1 SV=2	0	0	0	1	4	3	1.03778
P27773_K415	Pdia3	NLEPK*YK	PDIA3_MOUSE Protein disulfide-isomerase A3 OS=Mus musculus OX=10090 GN=Pdia3 PE=1 SV=2	0	0	0	0	0	1	1.19048
P27773_K417	Pdia3	YK*ELGEK	PDIA3_MOUSE Protein disulfide-isomerase A3 OS=Mus musculus OX=10090 GN=Pdia3 PE=1 SV=2	0	0	0	2	2	2	0.976878
P27773_K422	Pdia3	ELGEK*LSK	PDIA3_MOUSE Protein disulfide-isomerase A3 OS=Mus musculus OX=10090 GN=Pdia3 PE=1 SV=2	0	0	0	0	1	2	1.00935
P27870_K292	Vav1	YCSQVESASK*HLDQVATAR	VAV_MOUSE Proto-oncogene vav OS=Mus musculus OX=10090 GN=Vav1 PE=1 SV=1	0	0	0	0	3	0	0.908513
P27870_K374	Vav1	DLAQCVNEVK*R	VAV_MOUSE Proto-oncogene vav OS=Mus musculus OX=10090 GN=Vav1 PE=1 SV=1	0	0	0	0	0	2	1.069
P27870_K410	Vav1	IDGELK*ITSVER	VAV_MOUSE Proto-oncogene vav OS=Mus musculus OX=10090 GN=Vav1 PE=1 SV=1	0	0	0	0	0	2	0.899955
P27870_K555	Vav1	APAHK*ECLGR	VAV_MOUSE Proto-oncogene vav OS=Mus musculus OX=10090 GN=Vav1 PE=1 SV=1	0	0	0	0	6	5	1.02114
P27870_K810	Vav1	EGDIIK*ILNK	VAV_MOUSE Proto-oncogene vav OS=Mus musculus OX=10090 GN=Vav1 PE=1 SV=1	0	0	0	0	2	0	1.29685
P28574_K77	Max	K*NHTHQQDIDDLKR	MAX_MOUSE Protein max OS=Mus musculus OX=10090 GN=Max PE=1 SV=2	0	0	1	0	0	0	0.91743
P28656_K271	Nap1l1	NVTLK*TIK	NP1L1_MOUSE Nucleosome assembly protein 1-like 1 OS=Mus musculus OX=10090 GN=Nap1l1 PE=1 SV=2	0	0	0	2	0	3	1.08539
P28656_K82	Nap1l1	VNALK*NLQVK	NP1L1_MOUSE Nucleosome assembly protein 1-like 1 OS=Mus musculus OX=10090 GN=Nap1l1 PE=1 SV=2	0	0	0	0	3	5	0.915284
P28738_K876	Kif5c	VK*ALESALK	KIF5C_MOUSE Kinesin heavy chain isoform 5C OS=Mus musculus OX=10090 GN=Kif5c PE=1 SV=3	0	0	0	0	0	1	0.95238
P29341_K104	Pabpc1	SGVGNIFIK*NLDK	PABP1_MOUSE Polyadenylate-binding protein 1 OS=Mus musculus OX=10090 GN=Pabpc1 PE=1 SV=2	0	0	0	0	0	1	0.96154
P29341_K108	Pabpc1	NLDK*SIDNK	PABP1_MOUSE Polyadenylate-binding protein 1 OS=Mus musculus OX=10090 GN=Pabpc1 PE=1 SV=2	0	0	0	4	2	4	0.995458
P29341_K208	Pabpc1	IK*ELFGK	PABP1_MOUSE Polyadenylate-binding protein 1 OS=Mus musculus OX=10090 GN=Pabpc1 PE=1 SV=2	0	0	0	0	2	0	1.27293
P29341_K277	Pabpc1	QTELK*R	PABP1_MOUSE Polyadenylate-binding protein 1 OS=Mus musculus OX=10090 GN=Pabpc1 PE=1 SV=2	0	0	0	0	1	2	1.07416
P29341_K512	Pabpc1	TVPQYK*YAAGVR	PABP1_MOUSE Polyadenylate-binding protein 1 OS=Mus musculus OX=10090 GN=Pabpc1 PE=1 SV=2	0	0	1	1	0	1	1.23045
P29341_K606	Pabpc1	SK*VDEAVAVLQAHQAK	PABP1_MOUSE Polyadenylate-binding protein 1 OS=Mus musculus OX=10090 GN=Pabpc1 PE=1 SV=2	0	0	3	0	0	4	0.965174
P29341_K620	Pabpc1	SKVDEAVAVLQAHQAK*EAAQK	PABP1_MOUSE Polyadenylate-binding protein 1 OS=Mus musculus OX=10090 GN=Pabpc1 PE=1 SV=2	0	0	0	0	6	5	0.994615
P29341_K78	Pabpc1	ALDTMNFDVIK*GK	PABP1_MOUSE Polyadenylate-binding protein 1 OS=Mus musculus OX=10090 GN=Pabpc1 PE=1 SV=2	0	0	0	0	0	1	0.86207
P29351_K195	Ptpn6	YTVGGSETFDSLTDLVEHFK*K	PTN6_MOUSE Tyrosine-protein phosphatase non-receptor type 6 OS=Mus musculus OX=10090 GN=Ptpn6 PE=1 SV=2	0	0	0	0	2	0	1.0049
P29351_K232	Ptpn6	VLELNK*K	PTN6_MOUSE Tyrosine-protein phosphatase non-receptor type 6 OS=Mus musculus OX=10090 GN=Ptpn6 PE=1 SV=2	0	0	0	0	0	3	1.26614
P29351_K257	Ptpn6	QEVK*NLHQR	PTN6_MOUSE Tyrosine-protein phosphatase non-receptor type 6 OS=Mus musculus OX=10090 GN=Ptpn6 PE=1 SV=2	0	0	0	0	3	6	1.0793
P29351_K271	Ptpn6	LEGQRPENK*SK	PTN6_MOUSE Tyrosine-protein phosphatase non-receptor type 6 OS=Mus musculus OX=10090 GN=Ptpn6 PE=1 SV=2	0	0	0	0	2	2	1.0136
P29351_K34	Ptpn6	K*NQGDFSLSVR	PTN6_MOUSE Tyrosine-protein phosphatase non-receptor type 6 OS=Mus musculus OX=10090 GN=Ptpn6 PE=1 SV=2	0	0	1	0	0	1	0.856105
P29351_K356	Ptpn6	EVEK*GR	PTN6_MOUSE Tyrosine-protein phosphatase non-receptor type 6 OS=Mus musculus OX=10090 GN=Ptpn6 PE=1 SV=2	0	0	0	1	0	0	0.82619
P29351_K551	Ptpn6	SAHAK*ASR	PTN6_MOUSE Tyrosine-protein phosphatase non-receptor type 6 OS=Mus musculus OX=10090 GN=Ptpn6 PE=1 SV=2	0	0	1	1	2	2	1.02761
P29351_K560	Ptpn6	HK*EEVYENVHSK	PTN6_MOUSE Tyrosine-protein phosphatase non-receptor type 6 OS=Mus musculus OX=10090 GN=Ptpn6 PE=1 SV=2	0	0	0	0	1	0	1.40845
P29595_K48	Nedd8	LIYSGK*QMNDEK	NEDD8_MOUSE NEDD8 OS=Mus musculus OX=10090 GN=Nedd8 PE=1 SV=2	0	0	0	0	3	0	1.06871
P29758_K405	Oat	DNGLLAK*PTHGDIIR	OAT_MOUSE Ornithine aminotransferase, mitochondrial OS=Mus musculus OX=10090 GN=Oat PE=1 SV=1	0	0	0	0	4	0	0.871325
P30416_K179	Fkbp4	PNDGAMVEVALEGYHK*DR	FKBP4_MOUSE Peptidyl-prolyl cis-trans isomerase FKBP4 OS=Mus musculus OX=10090 GN=Fkbp4 PE=1 SV=5	0	0	0	0	1	0	1
P30416_K274	Fkbp4	LEQSNIVK*ER	FKBP4_MOUSE Peptidyl-prolyl cis-trans isomerase FKBP4 OS=Mus musculus OX=10090 GN=Fkbp4 PE=1 SV=5	0	0	0	0	0	3	1.13359
P30416_K287	Fkbp4	YK*QALLQYK	FKBP4_MOUSE Peptidyl-prolyl cis-trans isomerase FKBP4 OS=Mus musculus OX=10090 GN=Fkbp4 PE=1 SV=5	0	0	5	2	2	1	0.926116
P30416_K387	Fkbp4	VLQLYPSNK*AAK	FKBP4_MOUSE Peptidyl-prolyl cis-trans isomerase FKBP4 OS=Mus musculus OX=10090 GN=Fkbp4 PE=1 SV=5	0	0	0	0	3	0	0.98236
P30416_K390	Fkbp4	AAK*TQLAVCQQR	FKBP4_MOUSE Peptidyl-prolyl cis-trans isomerase FKBP4 OS=Mus musculus OX=10090 GN=Fkbp4 PE=1 SV=5	0	0	2	0	0	0	0.981885
P30416_K424	Fkbp4	LAEEEHK*VK	FKBP4_MOUSE Peptidyl-prolyl cis-trans isomerase FKBP4 OS=Mus musculus OX=10090 GN=Fkbp4 PE=1 SV=5	0	0	0	0	2	1	1.10763
P30416_K76	Fkbp4	DK*FSFDLGK	FKBP4_MOUSE Peptidyl-prolyl cis-trans isomerase FKBP4 OS=Mus musculus OX=10090 GN=Fkbp4 PE=1 SV=5	0	0	2	2	0	1	0.938078
P30681_K114	Hmgb2	IK*IEHPGLSIGDTAK	HMGB2_MOUSE High mobility group protein B2 OS=Mus musculus OX=10090 GN=Hmgb2 PE=1 SV=3	0	0	0	0	4	3	0.980326
P30681_K127	Hmgb2	IEHPGLSIGDTAK*K	HMGB2_MOUSE High mobility group protein B2 OS=Mus musculus OX=10090 GN=Hmgb2 PE=1 SV=3	0	0	1	2	6	6	0.994598
P30681_K128	Hmgb2	K*LGEMWSEQSAK	HMGB2_MOUSE High mobility group protein B2 OS=Mus musculus OX=10090 GN=Hmgb2 PE=1 SV=3	0	0	6	0	5	5	0.968974
P30681_K147	Hmgb2	DKQPYEQK*AAK	HMGB2_MOUSE High mobility group protein B2 OS=Mus musculus OX=10090 GN=Hmgb2 PE=1 SV=3	0	1	3	6	6	6	1.03463
P30681_K167	Hmgb2	GK*SEAGK	HMGB2_MOUSE High mobility group protein B2 OS=Mus musculus OX=10090 GN=Hmgb2 PE=1 SV=3	0	0	0	3	2	0	0.887674
P30681_K3	Hmgb2	GK*GDPNKPR	HMGB2_MOUSE High mobility group protein B2 OS=Mus musculus OX=10090 GN=Hmgb2 PE=1 SV=3	0	0	2	3	4	2	0.981603
P30681_K30	Hmgb2	K*HPDSSVNFAEFSK	HMGB2_MOUSE High mobility group protein B2 OS=Mus musculus OX=10090 GN=Hmgb2 PE=1 SV=3	0	2	5	6	6	6	0.999682
P30681_K59	Hmgb2	SK*FEDLAK	HMGB2_MOUSE High mobility group protein B2 OS=Mus musculus OX=10090 GN=Hmgb2 PE=1 SV=3	0	0	4	4	6	4	1.01602
P30681_K65	Hmgb2	SKFEDLAK*SDK	HMGB2_MOUSE High mobility group protein B2 OS=Mus musculus OX=10090 GN=Hmgb2 PE=1 SV=3	0	0	1	0	0	3	1.01221
P30681_K8	Hmgb2	GDPNK*PR	HMGB2_MOUSE High mobility group protein B2 OS=Mus musculus OX=10090 GN=Hmgb2 PE=1 SV=3	0	0	0	0	0	4	0.816155
P30681_K90	Hmgb2	KK*DPNAPK	HMGB2_MOUSE High mobility group protein B2 OS=Mus musculus OX=10090 GN=Hmgb2 PE=1 SV=3	0	0	0	1	0	0	1.23457
P31230_K33	Aimp1	QQVALLK*EK	AIMP1_MOUSE Aminoacyl tRNA synthase complex-interacting multifunctional protein 1 OS=Mus musculus OX=10090 GN=Aimp1 PE=1 SV=2	0	0	0	2	3	5	0.93457
P31230_K54	Aimp1	VENAK*LK	AIMP1_MOUSE Aminoacyl tRNA synthase complex-interacting multifunctional protein 1 OS=Mus musculus OX=10090 GN=Aimp1 PE=1 SV=2	0	0	0	3	2	3	1.19984
P31266_K341	Rbpj	IIQFQATPCPK*EQNK	SUH_MOUSE Recombining binding protein suppressor of hairless OS=Mus musculus OX=10090 GN=Rbpj PE=1 SV=1	0	0	0	0	0	1	0.88496
P31786_K51	Dbi	QATVGDVNTDRPGLLDLK*GK	ACBP_MOUSE Acyl-CoA-binding protein OS=Mus musculus OX=10090 GN=Dbi PE=1 SV=2	0	0	0	0	0	2	1.17171
P31786_K77	Dbi	TYVEK*VDELKK TYVEK*VDELK	ACBP_MOUSE Acyl-CoA-binding protein OS=Mus musculus OX=10090 GN=Dbi PE=1 SV=2	0	0	0	0	6	1	1.04491
P32020_K132	Scp2	GSIGTK*FSDR	SCP2_MOUSE Sterol carrier protein 2 OS=Mus musculus OX=10090 GN=Scp2 PE=1 SV=3	0	0	0	0	1	0	0.97087
P32067_K208	Ssb	AK*QEHEGR	LA_MOUSE Lupus La protein homolog OS=Mus musculus OX=10090 GN=Ssb PE=1 SV=1	0	0	2	1	0	2	1.01172
P32067_K311	Ssb	VLEGHAEK*EALKK	LA_MOUSE Lupus La protein homolog OS=Mus musculus OX=10090 GN=Ssb PE=1 SV=1	0	0	0	0	5	3	0.93742
P32067_K404	Ssb	DREEPASK*HK	LA_MOUSE Lupus La protein homolog OS=Mus musculus OX=10090 GN=Ssb PE=1 SV=1	0	0	0	0	1	0	0.95556
P32921_K31	Wars1	SLK*AGNAPK	SYWC_MOUSE Tryptophan--tRNA ligase, cytoplasmic OS=Mus musculus OX=10090 GN=Wars1 PE=1 SV=2	0	0	0	2	0	3	1.06137
P34022_K150	Ranbp1	FLNAENAQK*FK	RANG_MOUSE Ran-specific GTPase-activating protein OS=Mus musculus OX=10090 GN=Ranbp1 PE=1 SV=2	0	0	0	0	1	4	0.999308
P34022_K154	Ranbp1	TK*FEECR	RANG_MOUSE Ran-specific GTPase-activating protein OS=Mus musculus OX=10090 GN=Ranbp1 PE=1 SV=2	0	0	0	1	0	2	0.994303
P34022_K172	Ranbp1	KGPGK*NDNAEK	RANG_MOUSE Ran-specific GTPase-activating protein OS=Mus musculus OX=10090 GN=Ranbp1 PE=1 SV=2	0	0	2	0	0	0	0.985435
P34022_K182	Ranbp1	VAEK*LEALSVR	RANG_MOUSE Ran-specific GTPase-activating protein OS=Mus musculus OX=10090 GN=Ranbp1 PE=1 SV=2	0	0	2	0	0	3	1.03722
P34022_K76	Ranbp1	GTGDVK*LLK	RANG_MOUSE Ran-specific GTPase-activating protein OS=Mus musculus OX=10090 GN=Ranbp1 PE=1 SV=2	0	0	0	0	0	2	0.950135
P35278_K18	Rab5c	PNGPAAGNK*ICQFK	RAB5C_MOUSE Ras-related protein Rab-5C OS=Mus musculus OX=10090 GN=Rab5c PE=1 SV=2	0	0	2	0	3	4	1.05099
P35278_K181	Rab5c	K*LPKNEPQNAAGAPGR	RAB5C_MOUSE Ras-related protein Rab-5C OS=Mus musculus OX=10090 GN=Rab5c PE=1 SV=2	0	0	1	0	1	0	1.10142
P35278_K184	Rab5c	KLPK*NEPQNAAGAPGR LPK*NEPQNAAGAPGR	RAB5C_MOUSE Ras-related protein Rab-5C OS=Mus musculus OX=10090 GN=Rab5c PE=1 SV=2	0	0	6	3	6	6	1.11981
P35550_K108	Fbl	GK*EDALVTK	FBRL_MOUSE rRNA 2'-O-methyltransferase fibrillarin OS=Mus musculus OX=10090 GN=Fbl PE=1 SV=2	0	0	5	5	5	6	0.994637
P35550_K127	Fbl	NLVPGESVYGEK*R	FBRL_MOUSE rRNA 2'-O-methyltransferase fibrillarin OS=Mus musculus OX=10090 GN=Fbl PE=1 SV=2	0	0	0	1	1	3	0.98919
P35550_K211	Fbl	DLINLAK*K	FBRL_MOUSE rRNA 2'-O-methyltransferase fibrillarin OS=Mus musculus OX=10090 GN=Fbl PE=1 SV=2	0	0	0	0	0	4	1.05842
P35550_K90	Fbl	GNQSGK*NVMVEPHR	FBRL_MOUSE rRNA 2'-O-methyltransferase fibrillarin OS=Mus musculus OX=10090 GN=Fbl PE=1 SV=2	0	0	0	0	0	2	1.2863
P35564_K517	Canx	K*TDAPQPDVK	CALX_MOUSE Calnexin OS=Mus musculus OX=10090 GN=Canx PE=1 SV=1	0	0	1	0	0	0	1.28205
P35700_K120	Prdx1	TIAQDYGVLK*ADEGISFR	PRDX1_MOUSE Peroxiredoxin-1 OS=Mus musculus OX=10090 GN=Prdx1 PE=1 SV=1	0	0	0	0	1	0	0.81301
P35700_K168	Prdx1	LVQAFQFTDK*HGEVCPAGWKPGSDTIKPDVNK	PRDX1_MOUSE Peroxiredoxin-1 OS=Mus musculus OX=10090 GN=Prdx1 PE=1 SV=1	0	0	0	0	1	0	1.03093
P35700_K178	Prdx1	HGEVCPAGWK*PGSDTIKPDVNK	PRDX1_MOUSE Peroxiredoxin-1 OS=Mus musculus OX=10090 GN=Prdx1 PE=1 SV=1	0	0	1	2	3	4	1.04174
P35700_K185	Prdx1	HGEVCPAGWKPGSDTIK*PDVNK	PRDX1_MOUSE Peroxiredoxin-1 OS=Mus musculus OX=10090 GN=Prdx1 PE=1 SV=1	0	0	0	0	1	0	1.16279
P35700_K190	Prdx1	HGEVCPAGWKPGSDTIKPDVNK*SK	PRDX1_MOUSE Peroxiredoxin-1 OS=Mus musculus OX=10090 GN=Prdx1 PE=1 SV=1	0	0	0	0	4	2	1.0034
P35700_K67	Prdx1	ADEFK*K	PRDX1_MOUSE Peroxiredoxin-1 OS=Mus musculus OX=10090 GN=Prdx1 PE=1 SV=1	0	0	0	3	4	6	1.12202
P35700_K93	Prdx1	K*QGGLGPMNIPLISDPK	PRDX1_MOUSE Peroxiredoxin-1 OS=Mus musculus OX=10090 GN=Prdx1 PE=1 SV=1	0	0	2	0	0	1	1.19035
P35979_K40	Rpl12	IGPLGLSPK*K	RL12_MOUSE 60S ribosomal protein L12 OS=Mus musculus OX=10090 GN=Rpl12 PE=1 SV=2	0	0	1	4	3	6	1.05575
P35979_K41	Rpl12	K*VGDDIAK	RL12_MOUSE 60S ribosomal protein L12 OS=Mus musculus OX=10090 GN=Rpl12 PE=1 SV=2	0	0	0	0	0	2	1.00093
P35980_K115	Rpl18	ILK*AGGK	RL18_MOUSE 60S ribosomal protein L18 OS=Mus musculus OX=10090 GN=Rpl18 PE=1 SV=3	0	0	0	0	0	4	1.00364
P35980_K119	Rpl18	AGGK*ILTFDQLALESPK	RL18_MOUSE 60S ribosomal protein L18 OS=Mus musculus OX=10090 GN=Rpl18 PE=1 SV=3	0	0	0	0	1	0	1.17647
P35980_K97	Rpl18	ILEVPK*LK	RL18_MOUSE 60S ribosomal protein L18 OS=Mus musculus OX=10090 GN=Rpl18 PE=1 SV=3	0	0	0	0	4	2	0.950573
P36536_K146	Sar1a	TDAISEEK*LR	SAR1A_MOUSE GTP-binding protein SAR1a OS=Mus musculus OX=10090 GN=Sar1a PE=1 SV=1	0	0	0	0	0	4	0.916732
P37913_K208	Lig1	AGVK*LKPQEEEQSKPPAR	DNLI1_MOUSE DNA ligase 1 OS=Mus musculus OX=10090 GN=Lig1 PE=1 SV=2	0	0	0	1	6	0	1.05821
P37913_K210	Lig1	AGVKLK*PQEEEQSKPPAR	DNLI1_MOUSE DNA ligase 1 OS=Mus musculus OX=10090 GN=Lig1 PE=1 SV=2	0	0	0	1	0	0	1.0989
P38060_K137	Hmgcl	K*NANCSIEESFQR	HMGCL_MOUSE Hydroxymethylglutaryl-CoA lyase, mitochondrial OS=Mus musculus OX=10090 GN=Hmgcl PE=1 SV=2	0	0	3	0	0	0	0.753727
P38060_K184	Hmgcl	VSPAK*VAEVAK	HMGCL_MOUSE Hydroxymethylglutaryl-CoA lyase, mitochondrial OS=Mus musculus OX=10090 GN=Hmgcl PE=1 SV=2	0	0	0	0	0	3	0.972313
P38647_K135	Hspa9	RYDDPEVQK*DTK	GRP75_MOUSE Stress-70 protein, mitochondrial OS=Mus musculus OX=10090 GN=Hspa9 PE=1 SV=3	0	0	0	1	0	0	1.03093
P38647_K138	Hspa9	DTK*NVPFK	GRP75_MOUSE Stress-70 protein, mitochondrial OS=Mus musculus OX=10090 GN=Hspa9 PE=1 SV=3	0	0	0	3	4	1	0.974971
P38647_K143	Hspa9	NVPFK*IVR	GRP75_MOUSE Stress-70 protein, mitochondrial OS=Mus musculus OX=10090 GN=Hspa9 PE=1 SV=3	0	0	0	0	0	1	1.03093
P38647_K288	Hspa9	HIVK*EFK	GRP75_MOUSE Stress-70 protein, mitochondrial OS=Mus musculus OX=10090 GN=Hspa9 PE=1 SV=3	0	0	0	3	2	2	0.987771
P38647_K360	Hspa9	AQFEGIVTDLIK*R	GRP75_MOUSE Stress-70 protein, mitochondrial OS=Mus musculus OX=10090 GN=Hspa9 PE=1 SV=3	0	0	0	2	0	0	1.04437
P38647_K563	Hspa9	DDIENMVK*NAEK	GRP75_MOUSE Stress-70 protein, mitochondrial OS=Mus musculus OX=10090 GN=Hspa9 PE=1 SV=3	0	0	0	1	0	0	0.91743
P38647_K567	Hspa9	NAEK*YAEEDRR	GRP75_MOUSE Stress-70 protein, mitochondrial OS=Mus musculus OX=10090 GN=Hspa9 PE=1 SV=3	0	0	0	1	0	0	1.23457
P38647_K625	Hspa9	ALLAGK*DSETGENIR	GRP75_MOUSE Stress-70 protein, mitochondrial OS=Mus musculus OX=10090 GN=Hspa9 PE=1 SV=3	0	0	2	1	2	3	1.03135
P38647_K654	Hspa9	K*MASER	GRP75_MOUSE Stress-70 protein, mitochondrial OS=Mus musculus OX=10090 GN=Hspa9 PE=1 SV=3	0	0	0	3	0	0	0.939163
P39018_K7	RpS19a	VK*DIDQHAVTK	RS19A_DROME 40S ribosomal protein S19a OS=Drosophila melanogaster OX=7227 GN=RpS19a PE=1 SV=3	0	0	0	1	0	0	1.19048
P39054_K299	Dnm2	SK*LQSQLLSLEK	DYN2_MOUSE Dynamin-2 OS=Mus musculus OX=10090 GN=Dnm2 PE=1 SV=2	0	0	0	0	0	6	0.86661
P39087_K212	Grik2	DAK*PLLK	GRIK2_MOUSE Glutamate receptor ionotropic, kainate 2 OS=Mus musculus OX=10090 GN=Grik2 PE=1 SV=4	0	0	0	1	0	1	0.749325
P39749_K250	Fen1	AVDLIQK*HK	FEN1_MOUSE Flap endonuclease 1 OS=Mus musculus OX=10090 GN=Fen1 PE=1 SV=1	0	0	0	0	4	1	0.912068
P40124_K278	Cap1	HVSDDMK*THK	CAP1_MOUSE Adenylyl cyclase-associated protein 1 OS=Mus musculus OX=10090 GN=Cap1 PE=1 SV=4	0	0	1	0	3	1	1.38581
P40124_K281	Cap1	THK*NPALK	CAP1_MOUSE Adenylyl cyclase-associated protein 1 OS=Mus musculus OX=10090 GN=Cap1 PE=1 SV=4	0	0	0	4	4	6	1.0661
P40124_K286	Cap1	NPALK*AQSGPVR	CAP1_MOUSE Adenylyl cyclase-associated protein 1 OS=Mus musculus OX=10090 GN=Cap1 PE=1 SV=4	0	0	1	5	6	5	1.08389
P40124_K297	Cap1	SGPK*PFSAPK	CAP1_MOUSE Adenylyl cyclase-associated protein 1 OS=Mus musculus OX=10090 GN=Cap1 PE=1 SV=4	0	0	0	0	2	0	1.19972
P40124_K311	Cap1	PQTSPSPK*PATK	CAP1_MOUSE Adenylyl cyclase-associated protein 1 OS=Mus musculus OX=10090 GN=Cap1 PE=1 SV=4	0	0	1	2	2	4	1.14435
P40124_K316	Cap1	K*EPALLELEGK	CAP1_MOUSE Adenylyl cyclase-associated protein 1 OS=Mus musculus OX=10090 GN=Cap1 PE=1 SV=4	0	0	3	0	0	4	1.09796
P40124_K326	Cap1	KEPALLELEGK*K	CAP1_MOUSE Adenylyl cyclase-associated protein 1 OS=Mus musculus OX=10090 GN=Cap1 PE=1 SV=4	0	0	0	2	0	5	1.07277
P40124_K397	Cap1	DVK*VQVMGK	CAP1_MOUSE Adenylyl cyclase-associated protein 1 OS=Mus musculus OX=10090 GN=Cap1 PE=1 SV=4	0	0	2	5	4	4	1.02192
P40124_K62	Cap1	MSK*EIGGDVQK	CAP1_MOUSE Adenylyl cyclase-associated protein 1 OS=Mus musculus OX=10090 GN=Cap1 PE=1 SV=4	0	0	5	2	5	4	1.04097
P40124_K70	Cap1	EIGGDVQK*HAEMVHTGLK	CAP1_MOUSE Adenylyl cyclase-associated protein 1 OS=Mus musculus OX=10090 GN=Cap1 PE=1 SV=4	0	0	0	0	3	0	1.15357
P40124_K80	Cap1	HAEMVHTGLK*LER	CAP1_MOUSE Adenylyl cyclase-associated protein 1 OS=Mus musculus OX=10090 GN=Cap1 PE=1 SV=4	0	0	1	0	6	6	1.05803
P40142_K16	Tkt	LQALK*DTANR	TKT_MOUSE Transketolase OS=Mus musculus OX=10090 GN=Tkt PE=1 SV=1	0	0	0	0	1	0	1.03093
P40142_K232	Tkt	AFGQAK*HQPTAIIAK	TKT_MOUSE Transketolase OS=Mus musculus OX=10090 GN=Tkt PE=1 SV=1	0	0	3	2	4	5	1.08068
P40142_K254	Tkt	GITGIEDK*EAWHGKPLPK	TKT_MOUSE Transketolase OS=Mus musculus OX=10090 GN=Tkt PE=1 SV=1	0	0	0	0	1	0	1.07527
P40142_K314	Tkt	VGDK*IATR	TKT_MOUSE Transketolase OS=Mus musculus OX=10090 GN=Tkt PE=1 SV=1	0	0	1	0	1	3	0.96632
P40142_K319	Tkt	K*AYGLALAK	TKT_MOUSE Transketolase OS=Mus musculus OX=10090 GN=Tkt PE=1 SV=1	0	0	4	5	1	1	1.07324
P40142_K353	Tkt	K*EHPDR	TKT_MOUSE Transketolase OS=Mus musculus OX=10090 GN=Tkt PE=1 SV=1	0	0	1	0	0	0	1.04167
P40142_K497	Tkt	VVLK*SK	TKT_MOUSE Transketolase OS=Mus musculus OX=10090 GN=Tkt PE=1 SV=1	0	0	0	3	5	0	1.06806
P40142_K499	Tkt	SK*DDQVTVIGAGVTLHEALAAAESLKK	TKT_MOUSE Transketolase OS=Mus musculus OX=10090 GN=Tkt PE=1 SV=1	0	0	0	0	0	1	1.19048
P40142_K543	Tkt	K*LILDSAR	TKT_MOUSE Transketolase OS=Mus musculus OX=10090 GN=Tkt PE=1 SV=1	0	0	2	1	0	2	1.08041
P40630_K70	Tfam	AK*HPDAK	TFAM_MOUSE Transcription factor A, mitochondrial OS=Mus musculus OX=10090 GN=Tfam PE=1 SV=2	0	0	0	0	1	0	1.07527
P41241_K393	Csk	IPLK*DVVPR	CSK_MOUSE Tyrosine-protein kinase CSK OS=Mus musculus OX=10090 GN=Csk PE=1 SV=2	0	0	0	0	0	1	1.26582
P41241_K72	Csk	EGVK*AGTK	CSK_MOUSE Tyrosine-protein kinase CSK OS=Mus musculus OX=10090 GN=Csk PE=1 SV=2	0	0	0	0	1	0	1.05263
P42225_K216	Stat1	EIIHK*IR	STAT1_MOUSE Signal transducer and activator of transcription 1 OS=Mus musculus OX=10090 GN=Stat1 PE=1 SV=1	0	0	0	0	1	0	1.44928
P42227_K161	Stat3	VQDLEQK*MK	STAT3_MOUSE Signal transducer and activator of transcription 3 OS=Mus musculus OX=10090 GN=Stat3 PE=1 SV=2	0	0	0	0	2	2	0.972905
P42567_K152	Eps15	VK*PVLLNSK	EPS15_MOUSE Epidermal growth factor receptor substrate 15 OS=Mus musculus OX=10090 GN=Eps15 PE=1 SV=1	0	0	0	0	0	2	0.91326
P42932_K16	Cct8	APGFAQMLK*DGAK	TCPQ_MOUSE T-complex protein 1 subunit theta OS=Mus musculus OX=10090 GN=Cct8 PE=1 SV=3	0	0	2	0	0	2	0.791935
P42932_K20	Cct8	DGAK*HFSGLEEAVYR	TCPQ_MOUSE T-complex protein 1 subunit theta OS=Mus musculus OX=10090 GN=Cct8 PE=1 SV=3	0	0	0	0	5	3	0.813152
P42932_K318	Cct8	LNSK*WDLR	TCPQ_MOUSE T-complex protein 1 subunit theta OS=Mus musculus OX=10090 GN=Cct8 PE=1 SV=3	0	0	0	1	0	3	0.835333
P42932_K534	Cct8	PAGGPK*PPSGK	TCPQ_MOUSE T-complex protein 1 subunit theta OS=Mus musculus OX=10090 GN=Cct8 PE=1 SV=3	0	0	3	2	6	2	1.1209
P42932_K539	Cct8	PAGGPKPPSGK*K	TCPQ_MOUSE T-complex protein 1 subunit theta OS=Mus musculus OX=10090 GN=Cct8 PE=1 SV=3	0	0	1	0	0	0	1.31579
P43274_K140	H1-4	K*AAGTATAK	H14_MOUSE Histone H1.4 OS=Mus musculus OX=10090 GN=H1-4 PE=1 SV=2	0	1	0	0	0	0	0.86957
P43274_K148	H1-4	AAGTATAK*K	H14_MOUSE Histone H1.4 OS=Mus musculus OX=10090 GN=H1-4 PE=1 SV=2	0	0	0	4	0	0	1.01772
P43274_K186	H1-4	KAPK*SPAK	H14_MOUSE Histone H1.4 OS=Mus musculus OX=10090 GN=H1-4 PE=1 SV=2	0	0	2	0	0	0	1.04269
P43274_K26	H1-4	K*AAGGAK	H14_MOUSE Histone H1.4 OS=Mus musculus OX=10090 GN=H1-4 PE=1 SV=2	0	1	0	1	0	0	0.88633
P43274_K32	H1-4	AAGGAK*R	H14_MOUSE Histone H1.4 OS=Mus musculus OX=10090 GN=H1-4 PE=1 SV=2	0	0	0	2	0	1	0.732433
P43274_K46	H1-4	TSGPPVSELITK*AVAASK	H14_MOUSE Histone H1.4 OS=Mus musculus OX=10090 GN=H1-4 PE=1 SV=2	0	0	2	1	1	0	0.966368
P43275_K179	H1-1	VAK*SPAK	H11_MOUSE Histone H1.1 OS=Mus musculus OX=10090 GN=H1-1 PE=1 SV=2	0	0	0	3	0	0	0.754407
P43276_K127	H1-5	TGAAK*AK	H15_MOUSE Histone H1.5 OS=Mus musculus OX=10090 GN=H1-5 PE=1 SV=2	0	0	0	2	1	0	1.17974
P43276_K189	H1-5	SPAK*PK	H15_MOUSE Histone H1.5 OS=Mus musculus OX=10090 GN=H1-5 PE=1 SV=2	0	0	0	1	0	2	1.1566
P43276_K46	H1-5	ATGPPVSELITK*AVSASK	H15_MOUSE Histone H1.5 OS=Mus musculus OX=10090 GN=H1-5 PE=1 SV=2	0	0	1	1	0	0	0.962745
P43276_K52	H1-5	AVSASK*ER	H15_MOUSE Histone H1.5 OS=Mus musculus OX=10090 GN=H1-5 PE=1 SV=2	0	0	0	3	0	4	1.07564
P43276_K64	H1-5	K*ALAAGGYDVEK	H15_MOUSE Histone H1.5 OS=Mus musculus OX=10090 GN=H1-5 PE=1 SV=2	0	0	1	0	0	0	0.70423
P43277_K26	H1-3	K*TGAAAGK	H13_MOUSE Histone H1.3 OS=Mus musculus OX=10090 GN=H1-3 PE=1 SV=2	0	0	0	4	1	0	0.834254
P43277_K33	H1-3	TGAAAGK*R	H13_MOUSE Histone H1.3 OS=Mus musculus OX=10090 GN=H1-3 PE=1 SV=2	0	0	0	1	0	2	1.22589
P45376_K179	Akr1b1	YK*PAVNQIECHPYLTQEK	ALDR_MOUSE Aldo-keto reductase family 1 member B1 OS=Mus musculus OX=10090 GN=Akr1b1 PE=1 SV=3	1	0	0	0	0	0	1.19048
P45376_K235	Akr1b1	IK*AIAAK	ALDR_MOUSE Aldo-keto reductase family 1 member B1 OS=Mus musculus OX=10090 GN=Akr1b1 PE=1 SV=3	0	0	4	6	6	6	1.03676
P45376_K64	Akr1b1	LK*EQVVK	ALDR_MOUSE Aldo-keto reductase family 1 member B1 OS=Mus musculus OX=10090 GN=Akr1b1 PE=1 SV=3	0	0	2	6	6	6	0.998547
P45376_K90	Akr1b1	SMVK*GAFQK	ALDR_MOUSE Aldo-keto reductase family 1 member B1 OS=Mus musculus OX=10090 GN=Akr1b1 PE=1 SV=3	0	0	0	1	1	2	0.99803
P46061_K31	Rangap1	GLK*LNTAEDAK	RAGP1_MOUSE Ran GTPase-activating protein 1 OS=Mus musculus OX=10090 GN=Rangap1 PE=1 SV=2	0	0	0	0	0	1	0.70922
P46467_K10	Vps4b	NTNLQK*AIDLASK	VPS4B_MOUSE Vacuolar protein sorting-associated protein 4B OS=Mus musculus OX=10090 GN=Vps4b PE=1 SV=2	0	0	0	0	0	2	0.865115
P46467_K147	Vps4b	EALK*EAVILPIK	VPS4B_MOUSE Vacuolar protein sorting-associated protein 4B OS=Mus musculus OX=10090 GN=Vps4b PE=1 SV=2	0	0	0	0	0	1	1.25
P46467_K61	Vps4b	AK*CTEYLDR	VPS4B_MOUSE Vacuolar protein sorting-associated protein 4B OS=Mus musculus OX=10090 GN=Vps4b PE=1 SV=2	0	0	1	0	0	1	1.10746
P46471_K58	Psmc2	K*INELTGIK	PRS7_MOUSE 26S proteasome regulatory subunit 7 OS=Mus musculus OX=10090 GN=Psmc2 PE=1 SV=5	0	0	2	0	3	4	1.06387
P47757_K223	Capzb	LVEDMENK*IR	CAPZB_MOUSE F-actin-capping protein subunit beta OS=Mus musculus OX=10090 GN=Capzb PE=1 SV=3	0	0	0	0	1	4	1.0788
P47802_K159	Mtx1	LQLLCGEHK*SENEEELEK	MTX1_MOUSE Metaxin-1 OS=Mus musculus OX=10090 GN=Mtx1 PE=1 SV=1	0	0	0	0	4	0	1.06566
P47911_K18	Rpl6	K*AGSDAAASR	RL6_MOUSE 60S ribosomal protein L6 OS=Mus musculus OX=10090 GN=Rpl6 PE=1 SV=3	0	0	1	1	0	0	0.97582
P47911_K268	Rpl6	AVDLQILPK*IK	RL6_MOUSE 60S ribosomal protein L6 OS=Mus musculus OX=10090 GN=Rpl6 PE=1 SV=3	0	0	0	0	1	1	0.86855
P47911_K5	Rpl6	AGEK*APDTK	RL6_MOUSE 60S ribosomal protein L6 OS=Mus musculus OX=10090 GN=Rpl6 PE=1 SV=3	0	0	1	1	5	0	0.79096
P47911_K79	Rpl6	K*YSAAK	RL6_MOUSE 60S ribosomal protein L6 OS=Mus musculus OX=10090 GN=Rpl6 PE=1 SV=3	0	0	0	4	5	3	0.954273
P47911_K84	Rpl6	YSAAK*TK	RL6_MOUSE 60S ribosomal protein L6 OS=Mus musculus OX=10090 GN=Rpl6 PE=1 SV=3	0	0	0	5	6	5	1.14909
P47915_K112	Rpl29	SYMAK*GQR	RL29_MOUSE 60S ribosomal protein L29 OS=Mus musculus OX=10090 GN=Rpl29 PE=1 SV=2	0	0	0	1	2	0	0.919093
P47915_K120	Rpl29	LCQPK*PK	RL29_MOUSE 60S ribosomal protein L29 OS=Mus musculus OX=10090 GN=Rpl29 PE=1 SV=2	0	0	0	2	0	3	1.01431
P47915_K122	Rpl29	PK*VQTK	RL29_MOUSE 60S ribosomal protein L29 OS=Mus musculus OX=10090 GN=Rpl29 PE=1 SV=2	0	0	0	0	0	1	0.86207
P47915_K126	Rpl29	VQTK*AGAK	RL29_MOUSE 60S ribosomal protein L29 OS=Mus musculus OX=10090 GN=Rpl29 PE=1 SV=2	0	0	0	1	1	1	1.12507
P47915_K130	Rpl29	AGAK*APAK	RL29_MOUSE 60S ribosomal protein L29 OS=Mus musculus OX=10090 GN=Rpl29 PE=1 SV=2	0	0	1	2	4	1	0.968134
P47915_K134	Rpl29	APAK*AQASAPAQAPK	RL29_MOUSE 60S ribosomal protein L29 OS=Mus musculus OX=10090 GN=Rpl29 PE=1 SV=2	0	0	2	1	0	3	1.05725
P47915_K145	Rpl29	AQASAPAQAPK*GAQAPK	RL29_MOUSE 60S ribosomal protein L29 OS=Mus musculus OX=10090 GN=Rpl29 PE=1 SV=2	0	0	2	4	0	0	0.99322
P47915_K151	Rpl29	GAQAPK*GAQAPVK	RL29_MOUSE 60S ribosomal protein L29 OS=Mus musculus OX=10090 GN=Rpl29 PE=1 SV=2	0	0	1	2	0	3	1.22049
P47962_K178	Rpl5	GAVDGGLSIPHSTK*R	RL5_MOUSE 60S ribosomal protein L5 OS=Mus musculus OX=10090 GN=Rpl5 PE=1 SV=3	0	0	0	0	1	0	0.88496
P47962_K242	Rpl5	K*AHAAIR	RL5_MOUSE 60S ribosomal protein L5 OS=Mus musculus OX=10090 GN=Rpl5 PE=1 SV=3	0	0	0	2	4	0	0.907617
P47964_K62	Rpl36	AMELLK*VSK	RL36_MOUSE 60S ribosomal protein L36 OS=Mus musculus OX=10090 GN=Rpl36 PE=1 SV=2	0	0	4	6	6	6	1.0722
P48036_K307	Anxa5	GDTSGDYK*K	ANXA5_MOUSE Annexin A5 OS=Mus musculus OX=10090 GN=Anxa5 PE=1 SV=1	0	0	0	1	0	0	1.0101
P48036_K56	Anxa5	QEIAQEFK*TLFGR	ANXA5_MOUSE Annexin A5 OS=Mus musculus OX=10090 GN=Anxa5 PE=1 SV=1	0	0	1	1	0	0	0.946485
P48036_K74	Anxa5	SELTGK*FEK	ANXA5_MOUSE Annexin A5 OS=Mus musculus OX=10090 GN=Anxa5 PE=1 SV=1	0	0	0	0	0	2	1.03799
P48036_K95	Anxa5	LYDAYELK*HALK	ANXA5_MOUSE Annexin A5 OS=Mus musculus OX=10090 GN=Anxa5 PE=1 SV=1	0	0	0	0	4	1	0.954954
P48036_K99	Anxa5	HALK*GAGTDEK	ANXA5_MOUSE Annexin A5 OS=Mus musculus OX=10090 GN=Anxa5 PE=1 SV=1	0	0	4	4	4	5	1.00318
P48428_K41	Tbca	MK*AEDGENYAIK	TBCA_MOUSE Tubulin-specific chaperone A OS=Mus musculus OX=10090 GN=Tbca PE=1 SV=3	0	0	1	0	0	0	0.95238
P48428_K52	Tbca	K*QAEILQESR	TBCA_MOUSE Tubulin-specific chaperone A OS=Mus musculus OX=10090 GN=Tbca PE=1 SV=3	0	0	1	0	0	0	0.95238
P48678_K108	Lmna	LQLELSK*VR	LMNA_MOUSE Prelamin-A/C OS=Mus musculus OX=10090 GN=Lmna PE=1 SV=2	0	0	0	0	0	1	1.13636
P48678_K114	Lmna	VREEFK*ELK	LMNA_MOUSE Prelamin-A/C OS=Mus musculus OX=10090 GN=Lmna PE=1 SV=2	0	0	0	0	0	1	0.97087
P48678_K123	Lmna	K*EGDLLAAQAR	LMNA_MOUSE Prelamin-A/C OS=Mus musculus OX=10090 GN=Lmna PE=1 SV=2	0	0	1	0	0	1	0.95388
P48678_K135	Lmna	LK*DLEALLNSK	LMNA_MOUSE Prelamin-A/C OS=Mus musculus OX=10090 GN=Lmna PE=1 SV=2	0	0	1	0	1	1	1.15566
P48678_K171	Lmna	GQVAK*LEAALGEAK	LMNA_MOUSE Prelamin-A/C OS=Mus musculus OX=10090 GN=Lmna PE=1 SV=2	0	0	2	0	2	5	0.814308
P48678_K180	Lmna	LEAALGEAK*K	LMNA_MOUSE Prelamin-A/C OS=Mus musculus OX=10090 GN=Lmna PE=1 SV=2	0	0	0	3	0	3	1.09135
P48678_K201	Lmna	LQTLK*EELDFQK	LMNA_MOUSE Prelamin-A/C OS=Mus musculus OX=10090 GN=Lmna PE=1 SV=2	0	0	0	0	1	1	1.11543
P48678_K233	Lmna	LVEIDNGK*QR	LMNA_MOUSE Prelamin-A/C OS=Mus musculus OX=10090 GN=Lmna PE=1 SV=2	0	0	0	1	0	0	0.98039
P48678_K260	Lmna	AQHEDQVEQYK*K	LMNA_MOUSE Prelamin-A/C OS=Mus musculus OX=10090 GN=Lmna PE=1 SV=2	0	0	1	0	0	1	1.29167
P48678_K270	Lmna	TYSAK*LDNAR	LMNA_MOUSE Prelamin-A/C OS=Mus musculus OX=10090 GN=Lmna PE=1 SV=2	0	0	0	5	6	4	0.993737
P48678_K316	Lmna	QLAAK*EAK	LMNA_MOUSE Prelamin-A/C OS=Mus musculus OX=10090 GN=Lmna PE=1 SV=2	0	0	0	3	5	1	1.04579
P48678_K417	Lmna	ASSHSSQSQGGGSVTK*K	LMNA_MOUSE Prelamin-A/C OS=Mus musculus OX=10090 GN=Lmna PE=1 SV=2	0	0	2	3	0	0	1.08105
P48678_K420	Lmna	K*LESSESR	LMNA_MOUSE Prelamin-A/C OS=Mus musculus OX=10090 GN=Lmna PE=1 SV=2	0	0	2	0	0	1	1.18548
P48678_K97	Lmna	TLDSVAK*ER	LMNA_MOUSE Prelamin-A/C OS=Mus musculus OX=10090 GN=Lmna PE=1 SV=2	0	0	0	0	0	4	1.15786
P48722_K257	Hspa4l	INVK*ENSR	HS74L_MOUSE Heat shock 70 kDa protein 4L OS=Mus musculus OX=10090 GN=Hspa4l PE=1 SV=2	0	0	0	0	0	1	1.04167
P48722_K351	Hspa4l	IPAVK*EQVTR	HS74L_MOUSE Heat shock 70 kDa protein 4L OS=Mus musculus OX=10090 GN=Hspa4l PE=1 SV=2	0	0	0	0	6	0	1.12728
P48722_K53	Hspa4l	AIGNAAK*SQIVTNVR	HS74L_MOUSE Heat shock 70 kDa protein 4L OS=Mus musculus OX=10090 GN=Hspa4l PE=1 SV=2	0	0	0	0	0	4	1.03921
P48722_K774	Hspa4l	VSEIVTK*SK	HS74L_MOUSE Heat shock 70 kDa protein 4L OS=Mus musculus OX=10090 GN=Hspa4l PE=1 SV=2	0	0	0	5	5	2	1.10569
P48755_K116	Fosl1	RERNK*IAAAK	FOSL1_MOUSE Fos-related antigen 1 OS=Mus musculus OX=10090 GN=Fosl1 PE=2 SV=2	0	0	0	1	0	0	0.93458
P48962_K147	Slc25a4	LAADVGK*GSSQR	ADT1_MOUSE ADP/ATP translocase 1 OS=Mus musculus OX=10090 GN=Slc25a4 PE=1 SV=4	0	0	6	4	1	6	0.984744
P49138_K357	Mapkapk2	VDYEQIK*IK	MAPK2_MOUSE MAP kinase-activated protein kinase 2 OS=Mus musculus OX=10090 GN=Mapkapk2 PE=1 SV=2	0	0	0	0	3	0	1.09928
P49138_K360	Mapkapk2	K*IEDASNPLLLK	MAPK2_MOUSE MAP kinase-activated protein kinase 2 OS=Mus musculus OX=10090 GN=Mapkapk2 PE=1 SV=2	0	0	0	0	0	1	0.76923
P49312_K298	Hnrnpa1	SSGPYGGGGQYFAK*PR	ROA1_MOUSE Heterogeneous nuclear ribonucleoprotein A1 OS=Mus musculus OX=10090 GN=Hnrnpa1 PE=1 SV=2	0	0	2	3	1	6	1.00192
P49312_K52	Hnrnpa1	DPNTK*R	ROA1_MOUSE Heterogeneous nuclear ribonucleoprotein A1 OS=Mus musculus OX=10090 GN=Hnrnpa1 PE=1 SV=2	0	0	0	0	0	1	0.84034
P49710_K123	Hcls1	GFGGK*YGVER	HCLS1_MOUSE Hematopoietic lineage cell-specific protein OS=Mus musculus OX=10090 GN=Hcls1 PE=1 SV=2	0	0	0	0	2	2	0.918922
P49710_K146	Hcls1	GEVEK*HASQK	HCLS1_MOUSE Hematopoietic lineage cell-specific protein OS=Mus musculus OX=10090 GN=Hcls1 PE=1 SV=2	0	0	1	0	2	1	1.01963
P49710_K165	Hcls1	YGVEK*DKR	HCLS1_MOUSE Hematopoietic lineage cell-specific protein OS=Mus musculus OX=10090 GN=Hcls1 PE=1 SV=2	0	0	0	0	0	1	0.88077
P49710_K183	Hcls1	GETEK*HESQR	HCLS1_MOUSE Hematopoietic lineage cell-specific protein OS=Mus musculus OX=10090 GN=Hcls1 PE=1 SV=2	0	0	0	0	5	0	1.03922
P49710_K202	Hcls1	GFGGQYGIQK*DR	HCLS1_MOUSE Hematopoietic lineage cell-specific protein OS=Mus musculus OX=10090 GN=Hcls1 PE=1 SV=2	0	0	0	0	1	1	1.05695
P49710_K224	Hcls1	K*TTPIEAASSGAR	HCLS1_MOUSE Hematopoietic lineage cell-specific protein OS=Mus musculus OX=10090 GN=Hcls1 PE=1 SV=2	0	0	2	0	0	4	1.11984
P49710_K241	Hcls1	AK*FESLAEEK	HCLS1_MOUSE Hematopoietic lineage cell-specific protein OS=Mus musculus OX=10090 GN=Hcls1 PE=1 SV=2	0	0	0	0	0	1	0.92593
P49710_K249	Hcls1	FESLAEEK*R	HCLS1_MOUSE Hematopoietic lineage cell-specific protein OS=Mus musculus OX=10090 GN=Hcls1 PE=1 SV=2	0	0	0	1	0	1	0.919315
P49710_K41	Hcls1	WGAK*TIEGSGR	HCLS1_MOUSE Hematopoietic lineage cell-specific protein OS=Mus musculus OX=10090 GN=Hcls1 PE=1 SV=2	0	0	0	0	2	2	1.20487
P49710_K69	Hcls1	VSEEHDILK*K	HCLS1_MOUSE Hematopoietic lineage cell-specific protein OS=Mus musculus OX=10090 GN=Hcls1 PE=1 SV=2	0	0	0	0	6	2	1.21092
P49710_K70	Hcls1	K*KELESGPK	HCLS1_MOUSE Hematopoietic lineage cell-specific protein OS=Mus musculus OX=10090 GN=Hcls1 PE=1 SV=2	0	0	2	0	0	0	0.967265
P49710_K71	Hcls1	KK*ELESGPK	HCLS1_MOUSE Hematopoietic lineage cell-specific protein OS=Mus musculus OX=10090 GN=Hcls1 PE=1 SV=2	0	0	2	0	0	1	0.860233
P49718_K280	Mcm5	FGLNPSK*GR	MCM5_MOUSE DNA replication licensing factor MCM5 OS=Mus musculus OX=10090 GN=Mcm5 PE=1 SV=2	0	0	0	0	0	3	1.09516
P49722_K171	Psma2	NYVNGK*TFLEK	PSA2_MOUSE Proteasome subunit alpha type-2 OS=Mus musculus OX=10090 GN=Psma2 PE=1 SV=3	0	0	3	0	4	4	0.889834
P49722_K53	Psma2	QK*SILYDER	PSA2_MOUSE Proteasome subunit alpha type-2 OS=Mus musculus OX=10090 GN=Psma2 PE=1 SV=3	0	0	5	0	0	1	1.01705
P50516_K467	Atp6v1a	ALDEYYDK*HFTEFVPLR	VATA_MOUSE V-type proton ATPase catalytic subunit A OS=Mus musculus OX=10090 GN=Atp6v1a PE=1 SV=2	0	0	0	0	2	0	1.00505
P50518_K138	Atp6v1e1	K*QDFPLVK	VATE1_MOUSE V-type proton ATPase subunit E 1 OS=Mus musculus OX=10090 GN=Atp6v1e1 PE=1 SV=2	0	0	1	0	4	2	0.972057
P50543_K50	S100a11	NQK*DPGVLDR	S10AB_MOUSE Protein S100-A11 OS=Mus musculus OX=10090 GN=S100a11 PE=1 SV=1	0	0	1	6	4	6	1.05985
P51859_K105	Hdgf	ASGYQSSQK*K	HDGF_MOUSE Hepatoma-derived growth factor OS=Mus musculus OX=10090 GN=Hdgf PE=1 SV=2	0	0	0	5	4	2	1.06834
P51859_K167	Hdgf	AGDVLEDSPK*RPK	HDGF_MOUSE Hepatoma-derived growth factor OS=Mus musculus OX=10090 GN=Hdgf PE=1 SV=2	0	0	0	0	2	0	0.93998
P51881_K105	Slc25a5	QIFLGGVDK*R	ADT2_MOUSE ADP/ATP translocase 2 OS=Mus musculus OX=10090 GN=Slc25a5 PE=1 SV=3	0	0	0	5	5	3	1.06399
P51881_K147	Slc25a5	LAADVGK*AGAER	ADT2_MOUSE ADP/ATP translocase 2 OS=Mus musculus OX=10090 GN=Slc25a5 PE=1 SV=3	0	0	5	5	6	6	1.03803
P51881_K155	Slc25a5	EFK*GLGDCLVK	ADT2_MOUSE ADP/ATP translocase 2 OS=Mus musculus OX=10090 GN=Slc25a5 PE=1 SV=3	0	0	0	0	0	3	0.91592
P51881_K166	Slc25a5	IYK*SDGIK	ADT2_MOUSE ADP/ATP translocase 2 OS=Mus musculus OX=10090 GN=Slc25a5 PE=1 SV=3	0	0	0	4	2	0	1.09151
P51881_K268	Slc25a5	DEGSK*AFFK	ADT2_MOUSE ADP/ATP translocase 2 OS=Mus musculus OX=10090 GN=Slc25a5 PE=1 SV=3	0	0	0	4	3	2	1.01492
P51912_K379	Slc1a5	CVEEK*NGVAK	AAAT_MOUSE Neutral amino acid transporter B(0) OS=Mus musculus OX=10090 GN=Slc1a5 PE=1 SV=2	0	0	0	0	1	0	1.36986
P52431_K895	Pold1	AAADYAGK*QAHVELAER	DPOD1_MOUSE DNA polymerase delta catalytic subunit OS=Mus musculus OX=10090 GN=Pold1 PE=1 SV=2	0	0	0	0	1	0	0.80645
P52480_K115	Pkm	PVAVALDTK*GPEIR	KPYM_MOUSE Pyruvate kinase PKM OS=Mus musculus OX=10090 GN=Pkm PE=1 SV=4	0	0	0	1	3	4	1.25666
P52480_K125	Pkm	TGLIK*GSGTAEVELK	KPYM_MOUSE Pyruvate kinase PKM OS=Mus musculus OX=10090 GN=Pkm PE=1 SV=4	0	0	0	0	1	0	1.16279
P52480_K135	Pkm	GSGTAEVELK*K	KPYM_MOUSE Pyruvate kinase PKM OS=Mus musculus OX=10090 GN=Pkm PE=1 SV=4	0	0	0	6	4	5	1.03376
P52480_K141	Pkm	GATLK*ITLDNAYMEK	KPYM_MOUSE Pyruvate kinase PKM OS=Mus musculus OX=10090 GN=Pkm PE=1 SV=4	0	0	0	0	1	2	0.87064
P52480_K186	Pkm	IYVDDGLISLQVK*EK	KPYM_MOUSE Pyruvate kinase PKM OS=Mus musculus OX=10090 GN=Pkm PE=1 SV=4	0	0	0	0	1	0	0.9009
P52480_K188	Pkm	EK*GADFLVTEVENGGSLGSK	KPYM_MOUSE Pyruvate kinase PKM OS=Mus musculus OX=10090 GN=Pkm PE=1 SV=4	0	0	1	0	0	0	1.31579
P52480_K206	Pkm	GADFLVTEVENGGSLGSK*K	KPYM_MOUSE Pyruvate kinase PKM OS=Mus musculus OX=10090 GN=Pkm PE=1 SV=4	0	0	1	4	6	0	0.992991
P52480_K247	Pkm	K*AADVHEVR	KPYM_MOUSE Pyruvate kinase PKM OS=Mus musculus OX=10090 GN=Pkm PE=1 SV=4	0	0	2	2	6	4	0.938301
P52480_K261	Pkm	VLGEK*GK	KPYM_MOUSE Pyruvate kinase PKM OS=Mus musculus OX=10090 GN=Pkm PE=1 SV=4	0	0	0	6	6	6	1.02854
P52480_K62	Pkm	SVEMLK*EMIK	KPYM_MOUSE Pyruvate kinase PKM OS=Mus musculus OX=10090 GN=Pkm PE=1 SV=4	0	0	0	1	0	2	1.0392
P52480_K66	Pkm	EMIK*SGMNVAR	KPYM_MOUSE Pyruvate kinase PKM OS=Mus musculus OX=10090 GN=Pkm PE=1 SV=4	0	0	2	1	1	6	1.05656
P52927_K34	Hmga2	K*QQQEPTCEPSPK	HMGA2_MOUSE High mobility group protein HMGI-C OS=Mus musculus OX=10090 GN=Hmga2 PE=1 SV=1	0	0	1	0	0	0	0.82645
P53026_K106	Rpl10a	K*YDAFLASESLIK	RL10A_MOUSE 60S ribosomal protein L10a OS=Mus musculus OX=10090 GN=Rpl10a PE=1 SV=3	0	0	1	0	3	2	1.15043
P53026_K130	Rpl10a	ILGPGLNK*AGK	RL10A_MOUSE 60S ribosomal protein L10a OS=Mus musculus OX=10090 GN=Rpl10a PE=1 SV=3	0	0	0	0	3	4	0.982143
P53026_K56	Rpl10a	LK*STPR	RL10A_MOUSE 60S ribosomal protein L10a OS=Mus musculus OX=10090 GN=Rpl10a PE=1 SV=3	0	2	0	6	6	6	0.930942
P53026_K91	Rpl10a	AVDIPHMDIEALK*K	RL10A_MOUSE 60S ribosomal protein L10a OS=Mus musculus OX=10090 GN=Rpl10a PE=1 SV=3	0	0	0	3	6	6	1.12759
P53996_K86	Cnbp	GGHIAK*DCK	CNBP_MOUSE Cellular nucleic acid-binding protein OS=Mus musculus OX=10090 GN=Cnbp PE=1 SV=2	0	0	0	0	1	0	0.87719
P54103_K524	Dnajc2	AFDK*FK	DNJC2_MOUSE DnaJ homolog subfamily C member 2 OS=Mus musculus OX=10090 GN=Dnajc2 PE=1 SV=2	0	0	0	0	0	1	1.03093
P54227_K70	Stmn1	SHEAEVLK*QLAEK	STMN1_MOUSE Stathmin OS=Mus musculus OX=10090 GN=Stmn1 PE=1 SV=2	0	0	0	0	0	1	1.20482
P54276_K1313	Msh6	LANLPEEVIQK*GHR	MSH6_MOUSE DNA mismatch repair protein Msh6 OS=Mus musculus OX=10090 GN=Msh6 PE=1 SV=3	0	0	0	0	5	5	1.099
P54276_K917	Msh6	WDTAFDHEK*AR	MSH6_MOUSE DNA mismatch repair protein Msh6 OS=Mus musculus OX=10090 GN=Msh6 PE=1 SV=3	0	0	0	0	1	0	1.0989
P54728_K45	Rad23b	DAFPVAGQK*LIYAGK	RD23B_MOUSE UV excision repair protein RAD23 homolog B OS=Mus musculus OX=10090 GN=Rad23b PE=1 SV=2	0	0	0	2	0	0	0.9058
P54729_K364	Nub1	EYLNK*AR	NUB1_MOUSE NEDD8 ultimate buster 1 OS=Mus musculus OX=10090 GN=Nub1 PE=1 SV=2	0	0	0	0	5	2	0.934344
P54822_K147	Adsl	LADFAK*DR	PUR8_MOUSE Adenylosuccinate lyase OS=Mus musculus OX=10090 GN=Adsl PE=1 SV=2	0	0	0	3	3	4	1.02113
P54987_K460	Acod1	LLK*GPSVQDEASK	IRG1_MOUSE Cis-aconitate decarboxylase OS=Mus musculus OX=10090 GN=Acod1 PE=1 SV=2	0	0	0	0	0	1	1.03093
P56382_K37	Atp5f1e	ANAEK*TSGSSIK	ATP5E_MOUSE ATP synthase subunit epsilon, mitochondrial OS=Mus musculus OX=10090 GN=Atp5f1e PE=1 SV=2	0	0	1	0	0	1	0.752235
P56399_K743	Usp5	DQALK*ALR	UBP5_MOUSE Ubiquitin carboxyl-terminal hydrolase 5 OS=Mus musculus OX=10090 GN=Usp5 PE=1 SV=1	0	0	0	0	1	0	0.90909
P56477_K96	Irf5	CALNK*SR	IRF5_MOUSE Interferon regulatory factor 5 OS=Mus musculus OX=10090 GN=Irf5 PE=1 SV=1	0	0	0	0	4	0	1.18568
P56480_K124	Atp5f1b	GQK*VLDSGAPIK	ATPB_MOUSE ATP synthase subunit beta, mitochondrial OS=Mus musculus OX=10090 GN=Atp5f1b PE=1 SV=2	0	0	3	1	6	4	1.13579
P56480_K133	Atp5f1b	VLDSGAPIK*IPVGPETLGR	ATPB_MOUSE ATP synthase subunit beta, mitochondrial OS=Mus musculus OX=10090 GN=Atp5f1b PE=1 SV=2	0	0	1	2	0	2	1.08842
P56480_K159	Atp5f1b	GPIK*TK	ATPB_MOUSE ATP synthase subunit beta, mitochondrial OS=Mus musculus OX=10090 GN=Atp5f1b PE=1 SV=2	0	0	0	5	5	4	1.04925
P56480_K198	Atp5f1b	VVDLLAPYAK*GGK	ATPB_MOUSE ATP synthase subunit beta, mitochondrial OS=Mus musculus OX=10090 GN=Atp5f1b PE=1 SV=2	0	0	0	2	0	0	1.0814
P56480_K426	Atp5f1b	GVQK*ILQDYK	ATPB_MOUSE ATP synthase subunit beta, mitochondrial OS=Mus musculus OX=10090 GN=Atp5f1b PE=1 SV=2	0	0	0	0	1	0	0.9901
P56480_K485	Atp5f1b	LVPLK*ETIK	ATPB_MOUSE ATP synthase subunit beta, mitochondrial OS=Mus musculus OX=10090 GN=Atp5f1b PE=1 SV=2	0	0	0	4	4	5	1.06578
P56480_K522	Atp5f1b	ADK*LAEEHGS	ATPB_MOUSE ATP synthase subunit beta, mitochondrial OS=Mus musculus OX=10090 GN=Atp5f1b PE=1 SV=2	0	0	0	0	2	2	1.10381
P56480_K55	Atp5f1b	AAQASAAPK*AGTATGR	ATPB_MOUSE ATP synthase subunit beta, mitochondrial OS=Mus musculus OX=10090 GN=Atp5f1b PE=1 SV=2	0	0	2	3	0	2	1.02296
P56812_K20	Pdcd5	LAELQAK*HGDPGDAAQQEAK	PDCD5_MOUSE Programmed cell death protein 5 OS=Mus musculus OX=10090 GN=Pdcd5 PE=1 SV=3	0	0	0	0	4	0	0.984803
P56959_K358	Fus	EFSGNPIK*VSFATR	FUS_MOUSE RNA-binding protein FUS OS=Mus musculus OX=10090 GN=Fus PE=1 SV=1	0	0	0	0	0	1	0.92593
P57722_K315	Pcbp3	QGTK*INEIR	PCBP3_MOUSE Poly(rC)-binding protein 3 OS=Mus musculus OX=10090 GN=Pcbp3 PE=1 SV=3	0	0	0	2	0	0	0.94175
P57776_K117	Eef1d	LSSLEK*SSPTPR	EF1D_MOUSE Elongation factor 1-delta OS=Mus musculus OX=10090 GN=Eef1d PE=1 SV=3	0	0	2	0	0	0	1.06323
P57776_K189	Eef1d	K*PTLVAK	EF1D_MOUSE Elongation factor 1-delta OS=Mus musculus OX=10090 GN=Eef1d PE=1 SV=3	0	0	0	1	4	4	0.969949
P57780_K418	Actn4	LDHLAEK*FR	ACTN4_MOUSE Alpha-actinin-4 OS=Mus musculus OX=10090 GN=Actn4 PE=1 SV=1	0	0	0	2	4	4	1.07246
P57780_K633	Actn4	VQQLVPK*R	ACTN4_MOUSE Alpha-actinin-4 OS=Mus musculus OX=10090 GN=Actn4 PE=1 SV=1	0	0	0	0	0	1	0.86957
P57784_K172	Snrpa1	GAQLAK*DIAR	RU2A_MOUSE U2 small nuclear ribonucleoprotein A' OS=Mus musculus OX=10090 GN=Snrpa1 PE=1 SV=2	0	0	0	1	1	3	0.983548
P58021_K233	Tm9sf2	LVAAK*LEPK	TM9S2_MOUSE Transmembrane 9 superfamily member 2 OS=Mus musculus OX=10090 GN=Tm9sf2 PE=1 SV=1	0	0	0	0	0	2	0.986395
P58058_K57	Nadk	SLSASPALGSTK*EFR	NADK_MOUSE NAD kinase OS=Mus musculus OX=10090 GN=Nadk PE=1 SV=2	0	0	1	0	0	3	1.06724
P58252_K239	Eef2	FAAK*GEGQLSAAER	EF2_MOUSE Elongation factor 2 OS=Mus musculus OX=10090 GN=Eef2 PE=1 SV=2	0	0	3	0	0	4	1.15172
P58252_K252	Eef2	K*VEDMMK	EF2_MOUSE Elongation factor 2 OS=Mus musculus OX=10090 GN=Eef2 PE=1 SV=2	0	0	4	6	6	5	1.0141
P58252_K259	Eef2	K*LWGDR	EF2_MOUSE Elongation factor 2 OS=Mus musculus OX=10090 GN=Eef2 PE=1 SV=2	0	2	3	6	5	5	1.01757
P58252_K275	Eef2	FSK*SANSPDGK	EF2_MOUSE Elongation factor 2 OS=Mus musculus OX=10090 GN=Eef2 PE=1 SV=2	0	0	5	6	5	4	1.0337
P58252_K283	Eef2	SANSPDGK*K	EF2_MOUSE Elongation factor 2 OS=Mus musculus OX=10090 GN=Eef2 PE=1 SV=2	0	0	0	2	0	0	1.29709
P58252_K314	Eef2	KEETAK*LIEK	EF2_MOUSE Elongation factor 2 OS=Mus musculus OX=10090 GN=Eef2 PE=1 SV=2	0	0	0	0	5	4	1.03903
P58252_K318	Eef2	LIEK*LDIK	EF2_MOUSE Elongation factor 2 OS=Mus musculus OX=10090 GN=Eef2 PE=1 SV=2	0	2	3	6	6	6	1.04732
P58252_K337	Eef2	EGKPLLK*AVMR	EF2_MOUSE Elongation factor 2 OS=Mus musculus OX=10090 GN=Eef2 PE=1 SV=2	0	0	0	0	6	2	1.03443
P58252_K407	Eef2	MVPTSDK*GR	EF2_MOUSE Elongation factor 2 OS=Mus musculus OX=10090 GN=Eef2 PE=1 SV=2	0	1	1	6	1	6	1.04951
P58252_K439	Eef2	K*EDLYLKPIQR	EF2_MOUSE Elongation factor 2 OS=Mus musculus OX=10090 GN=Eef2 PE=1 SV=2	0	0	1	4	5	3	1.06398
P58252_K445	Eef2	KEDLYLK*PIQR	EF2_MOUSE Elongation factor 2 OS=Mus musculus OX=10090 GN=Eef2 PE=1 SV=2	0	0	0	1	3	5	1.05999
P58252_K512	Eef2	VAVEAK*NPADLPK	EF2_MOUSE Elongation factor 2 OS=Mus musculus OX=10090 GN=Eef2 PE=1 SV=2	0	0	2	2	0	6	1.03868
P58252_K571	Eef2	DLEEDHACIPIK*K	EF2_MOUSE Elongation factor 2 OS=Mus musculus OX=10090 GN=Eef2 PE=1 SV=2	0	0	0	0	0	2	0.76878
P58252_K572	Eef2	K*SDPVVSYR	EF2_MOUSE Elongation factor 2 OS=Mus musculus OX=10090 GN=Eef2 PE=1 SV=2	0	2	6	6	4	6	1.05739
P58252_K605	Eef2	LYMK*AR	EF2_MOUSE Elongation factor 2 OS=Mus musculus OX=10090 GN=Eef2 PE=1 SV=2	0	0	0	1	0	1	0.683905
P58252_K61	Eef2	K*DEQER	EF2_MOUSE Elongation factor 2 OS=Mus musculus OX=10090 GN=Eef2 PE=1 SV=2	0	0	0	0	0	1	1.14943
P58742_K56	Aaas	DPLK*APGR	AAAS_MOUSE Aladin OS=Mus musculus OX=10090 GN=Aaas PE=1 SV=1	0	0	0	0	0	2	1.09686
P58801_K72	Ripk2	EAEILHK*AR	RIPK2_MOUSE Receptor-interacting serine/threonine-protein kinase 2 OS=Mus musculus OX=10090 GN=Ripk2 PE=1 SV=1	0	0	0	0	2	0	1.4207
P59325_K24	Eif5	LIAK*VEGK	IF5_MOUSE Eukaryotic translation initiation factor 5 OS=Mus musculus OX=10090 GN=Eif5 PE=1 SV=1	0	0	0	0	0	2	0.960655
P60122_K171	Ruvbl1	QLK*LDPSIFESLQK	RUVB1_MOUSE RuvB-like 1 OS=Mus musculus OX=10090 GN=Ruvbl1 PE=1 SV=1	0	0	2	1	0	0	1.02325
P60122_K2	Ruvbl1	MK*IEEVK	RUVB1_MOUSE RuvB-like 1 OS=Mus musculus OX=10090 GN=Ruvbl1 PE=1 SV=1	4	0	0	0	0	0	1.05014
P60122_K230	Ruvbl1	GDVHK*K	RUVB1_MOUSE RuvB-like 1 OS=Mus musculus OX=10090 GN=Ruvbl1 PE=1 SV=1	0	0	0	0	1	0	0.97087
P60122_K274	Ruvbl1	TEITDK*LR	RUVB1_MOUSE RuvB-like 1 OS=Mus musculus OX=10090 GN=Ruvbl1 PE=1 SV=1	0	0	0	0	0	2	0.812595
P60229_K275	Eif3e	QVLK*DLVK	EIF3E_MOUSE Eukaryotic translation initiation factor 3 subunit E OS=Mus musculus OX=10090 GN=Eif3e PE=1 SV=1	0	0	1	3	0	1	1.0635
P60335_K115	Pcbp1	LVVPATQCGSLIGK*GGCK	PCBP1_MOUSE Poly(rC)-binding protein 1 OS=Mus musculus OX=10090 GN=Pcbp1 PE=1 SV=1	0	0	0	4	3	6	1.08886
P60335_K314	Pcbp1	QMSGAQIK*IANPVEGSSGR	PCBP1_MOUSE Poly(rC)-binding protein 1 OS=Mus musculus OX=10090 GN=Pcbp1 PE=1 SV=1	0	0	0	0	0	1	0.8547
P60335_K37	Pcbp1	GESVK*R	PCBP1_MOUSE Poly(rC)-binding protein 1 OS=Mus musculus OX=10090 GN=Pcbp1 PE=1 SV=1	0	0	0	0	0	1	1.16279
P60710_K113	Actb	VAPEEHPVLLTEAPLNPK*ANR	ACTB_MOUSE Actin, cytoplasmic 1 OS=Mus musculus OX=10090 GN=Actb PE=1 SV=1	0	2	4	5	6	6	1.04099
P60710_K291	Actb	K*DLYANTVLSGGTTMYPGIADR	ACTB_MOUSE Actin, cytoplasmic 1 OS=Mus musculus OX=10090 GN=Actb PE=1 SV=1	0	0	1	0	0	2	1.04575
P60766_K133	Cdc42	NK*QKPITPETAEK	CDC42_MOUSE Cell division control protein 42 homolog OS=Mus musculus OX=10090 GN=Cdc42 PE=1 SV=2	0	0	0	1	0	0	0.71429
P60843_K146	Eif4a1	AEVQK*LQMEAPHIIVGTPGR	IF4A1_MOUSE Eukaryotic initiation factor 4A-I OS=Mus musculus OX=10090 GN=Eif4a1 PE=1 SV=1	0	0	1	0	2	4	1.10767
P60843_K174	Eif4a1	YLSPK*YIK	IF4A1_MOUSE Eukaryotic initiation factor 4A-I OS=Mus musculus OX=10090 GN=Eif4a1 PE=1 SV=1	0	0	0	4	6	4	1.09039
P60843_K193	Eif4a1	GFK*DQIYDIFQK	IF4A1_MOUSE Eukaryotic initiation factor 4A-I OS=Mus musculus OX=10090 GN=Eif4a1 PE=1 SV=1	0	0	2	0	2	0	1.0428
P60843_K291	Eif4a1	VDWLTEK*MHAR	IF4A1_MOUSE Eukaryotic initiation factor 4A-I OS=Mus musculus OX=10090 GN=Eif4a1 PE=1 SV=1	0	0	0	0	1	0	1.16279
P60843_K309	Eif4a1	DFTVSAMHGDMDQK*ER	IF4A1_MOUSE Eukaryotic initiation factor 4A-I OS=Mus musculus OX=10090 GN=Eif4a1 PE=1 SV=1	0	0	0	0	3	0	1.08166
P60843_K381	Eif4a1	KGVAINMVTEEDK*R	IF4A1_MOUSE Eukaryotic initiation factor 4A-I OS=Mus musculus OX=10090 GN=Eif4a1 PE=1 SV=1	0	0	0	0	2	1	1.01887
P60867_K30	Rps20	NVK*SLEK	RS20_MOUSE 40S ribosomal protein S20 OS=Mus musculus OX=10090 GN=Rps20 PE=1 SV=1	0	0	0	0	0	1	1.35135
P60867_K8	Rps20	DTGK*TPVEPEVAIHR	RS20_MOUSE 40S ribosomal protein S20 OS=Mus musculus OX=10090 GN=Rps20 PE=1 SV=1	0	0	0	0	0	5	0.916626
P61021_K183	Rab5b	KLPK*SEPQNLGGAAGR	RAB5B_MOUSE Ras-related protein Rab-5B OS=Mus musculus OX=10090 GN=Rab5b PE=1 SV=1	0	0	0	0	0	1	1.35135
P61079_K8	Ube2d3	INK*ELSDLAR	UB2D3_MOUSE Ubiquitin-conjugating enzyme E2 D3 OS=Mus musculus OX=10090 GN=Ube2d3 PE=1 SV=1	0	0	3	0	1	3	1.03254
P61087_K14	Ube2k	EFK*EVLK	UBE2K_MOUSE Ubiquitin-conjugating enzyme E2 K OS=Mus musculus OX=10090 GN=Ube2k PE=1 SV=3	0	0	0	4	2	2	1.00272
P61089_K10	Ube2n	IIK*ETQR	UBE2N_MOUSE Ubiquitin-conjugating enzyme E2 N OS=Mus musculus OX=10090 GN=Ube2n PE=1 SV=1	0	0	0	4	0	6	1.1124
P61089_K92	Ube2n	ICLDILK*DK	UBE2N_MOUSE Ubiquitin-conjugating enzyme E2 N OS=Mus musculus OX=10090 GN=Ube2n PE=1 SV=1	0	0	0	3	3	0	1.05886
P61161_K336	Actr2	GDVEK*LSK	ARP2_MOUSE Actin-related protein 2 OS=Mus musculus OX=10090 GN=Actr2 PE=1 SV=1	0	0	0	0	0	1	1.02041
P61205_K142	Arf3	QDLPNAMNAAEITDK*LGLHSLR	ARF3_MOUSE ADP-ribosylation factor 3 OS=Mus musculus OX=10090 GN=Arf3 PE=2 SV=2	0	0	0	0	1	1	0.873015
P61222_K415	Abce1	LKPDEGGEVPVLNVSYKPQK*ISPK	ABCE1_MOUSE ATP-binding cassette sub-family E member 1 OS=Mus musculus OX=10090 GN=Abce1 PE=1 SV=1	0	0	0	0	4	0	1.06783
P61222_K419	Abce1	ISPK*STGSVR	ABCE1_MOUSE ATP-binding cassette sub-family E member 1 OS=Mus musculus OX=10090 GN=Abce1 PE=1 SV=1	0	0	0	0	0	1	1
P61222_K584	Abce1	LNSIK*DVEQK	ABCE1_MOUSE ATP-binding cassette sub-family E member 1 OS=Mus musculus OX=10090 GN=Abce1 PE=1 SV=1	0	0	0	0	0	6	1.02889
P61290_K121	Psme3	SNQQLVDIIEK*VKPEIR	PSME3_MOUSE Proteasome activator complex subunit 3 OS=Mus musculus OX=10090 GN=Psme3 PE=1 SV=1	0	0	1	0	2	0	0.959263
P61290_K14	Psme3	LK*VDSFR	PSME3_MOUSE Proteasome activator complex subunit 3 OS=Mus musculus OX=10090 GN=Psme3 PE=1 SV=1	0	0	0	0	0	1	1.31579
P61358_K6	Rpl27	FMK*PGK	RL27_MOUSE 60S ribosomal protein L27 OS=Mus musculus OX=10090 GN=Rpl27 PE=1 SV=2	0	0	0	0	0	1	1.33333
P61358_K93	Rpl27	YSVDIPLDK*TVVNK	RL27_MOUSE 60S ribosomal protein L27 OS=Mus musculus OX=10090 GN=Rpl27 PE=1 SV=2	0	0	3	4	4	4	1.07354
P61358_K98	Rpl27	TVVNK*DVFR	RL27_MOUSE 60S ribosomal protein L27 OS=Mus musculus OX=10090 GN=Rpl27 PE=1 SV=2	0	0	0	1	3	3	1.12222
P61514_K28	Rpl37a	K*IEISQHAK	RL37A_MOUSE 60S ribosomal protein L37a OS=Mus musculus OX=10090 GN=Rpl37a PE=1 SV=2	0	0	0	0	0	1	0.92593
P61620_K107	Sec61a1	IIEVGDTPK*DR	S61A1_MOUSE Protein transport protein Sec61 subunit alpha isoform 1 OS=Mus musculus OX=10090 GN=Sec61a1 PE=1 SV=2	0	0	0	0	0	2	1.08364
P61620_K268	Sec61a1	VDLPIK*SAR	S61A1_MOUSE Protein transport protein Sec61 subunit alpha isoform 1 OS=Mus musculus OX=10090 GN=Sec61a1 PE=1 SV=2	0	0	0	0	0	3	0.964217
P61620_K392	Sec61a1	DVAK*QLK	S61A1_MOUSE Protein transport protein Sec61 subunit alpha isoform 1 OS=Mus musculus OX=10090 GN=Sec61a1 PE=1 SV=2	0	0	0	0	0	1	1.2987
P61759_K58	Vbp1	LDEQYQK*YK	PFD3_MOUSE Prefoldin subunit 3 OS=Mus musculus OX=10090 GN=Vbp1 PE=1 SV=2	0	0	0	0	3	0	0.9787
P61957_K11	Sumo2	EGVK*TENNDHINLK	SUMO2_MOUSE Small ubiquitin-related modifier 2 OS=Mus musculus OX=10090 GN=Sumo2 PE=1 SV=1	0	0	0	0	3	2	1.07945
P61957_K33	Sumo2	VAGQDGSVVQFK*IK	SUMO2_MOUSE Small ubiquitin-related modifier 2 OS=Mus musculus OX=10090 GN=Sumo2 PE=1 SV=1	0	0	1	3	3	2	1.16428
P61979_K198	Hnrnpk	VVLIGGK*PDR	HNRPK_MOUSE Heterogeneous nuclear ribonucleoprotein K OS=Mus musculus OX=10090 GN=Hnrnpk PE=1 SV=1	0	0	0	0	0	4	1.06389
P61979_K405	Hnrnpk	DLAGSIIGK*GGQR	HNRPK_MOUSE Heterogeneous nuclear ribonucleoprotein K OS=Mus musculus OX=10090 GN=Hnrnpk PE=1 SV=1	0	0	0	3	3	3	1.11785
P61979_K52	Hnrnpk	ILLQSK*NAGAVIGK	HNRPK_MOUSE Heterogeneous nuclear ribonucleoprotein K OS=Mus musculus OX=10090 GN=Hnrnpk PE=1 SV=1	0	0	0	0	0	2	0.933645
P61979_K60	Hnrnpk	NAGAVIGK*GGK	HNRPK_MOUSE Heterogeneous nuclear ribonucleoprotein K OS=Mus musculus OX=10090 GN=Hnrnpk PE=1 SV=1	0	0	1	6	6	6	1.00388
P61979_K63	Hnrnpk	GGK*NIK	HNRPK_MOUSE Heterogeneous nuclear ribonucleoprotein K OS=Mus musculus OX=10090 GN=Hnrnpk PE=1 SV=1	0	0	0	6	5	0	0.809546
P61982_K10	Ywhag	EQLVQK*AR	1433G_MOUSE 14-3-3 protein gamma OS=Mus musculus OX=10090 GN=Ywhag PE=1 SV=2	0	0	0	5	5	6	1.02695
P61982_K142	Ywhag	YLAEVATGEK*R	1433G_MOUSE 14-3-3 protein gamma OS=Mus musculus OX=10090 GN=Ywhag PE=1 SV=2	0	0	1	5	0	5	1.05601
P61982_K162	Ywhag	AYSEAHEISK*EHMQPTHPIR	1433G_MOUSE 14-3-3 protein gamma OS=Mus musculus OX=10090 GN=Ywhag PE=1 SV=2	0	0	0	0	4	0	1.18258
P61982_K69	Ywhag	VISSIEQK*TSADGNEK	1433G_MOUSE 14-3-3 protein gamma OS=Mus musculus OX=10090 GN=Ywhag PE=1 SV=2	0	0	0	2	0	2	1.01965
P62082_K169	Rps7	AQQNNVEHK*VETFSGVYK	RS7_MOUSE 40S ribosomal protein S7 OS=Mus musculus OX=10090 GN=Rps7 PE=2 SV=1	0	0	2	0	6	2	1.02675
P62192_K98	Psmc1	SK*VDDLR	PRS4_MOUSE 26S proteasome regulatory subunit 4 OS=Mus musculus OX=10090 GN=Psmc1 PE=1 SV=1	0	0	0	0	0	1	0.96154
P62242_K157	Rps8	NAK*ISSLLEEQFQQGK	RS8_MOUSE 40S ribosomal protein S8 OS=Mus musculus OX=10090 GN=Rps8 PE=1 SV=2	0	0	0	0	0	2	1.12417
P62242_K37	Rps8	PAANTK*IGPR	RS8_MOUSE 40S ribosomal protein S8 OS=Mus musculus OX=10090 GN=Rps8 PE=1 SV=2	0	0	0	0	1	2	1.02349
P62259_K142	Ywhae	K*EAAENSLVAYK	1433E_MOUSE 14-3-3 protein epsilon OS=Mus musculus OX=10090 GN=Ywhae PE=1 SV=1	0	0	4	3	4	6	1.09693
P62259_K69	Ywhae	IISSIEQK*EENKGGEDK	1433E_MOUSE 14-3-3 protein epsilon OS=Mus musculus OX=10090 GN=Ywhae PE=1 SV=1	0	0	3	3	4	5	0.977695
P62259_K78	Ywhae	EENKGGEDK*LK	1433E_MOUSE 14-3-3 protein epsilon OS=Mus musculus OX=10090 GN=Ywhae PE=1 SV=1	0	0	0	0	1	2	1.11911
P62270_K150	Rps18	TVGVSK*K	RS18_MOUSE 40S ribosomal protein S18 OS=Mus musculus OX=10090 GN=Rps18 PE=1 SV=3	0	0	0	6	2	4	1.05456
P62281_K30	Rps11	VLLGETGK*EK	RS11_MOUSE 40S ribosomal protein S11 OS=Mus musculus OX=10090 GN=Rps11 PE=1 SV=3	0	0	0	0	3	3	1.04117
P62281_K45	Rps11	NIGLGFK*TPK	RS11_MOUSE 40S ribosomal protein S11 OS=Mus musculus OX=10090 GN=Rps11 PE=1 SV=3	0	0	0	0	2	0	0.954585
P62301_K39	Rps13	EQIYK*LAK	RS13_MOUSE 40S ribosomal protein S13 OS=Mus musculus OX=10090 GN=Rps13 PE=1 SV=2	0	0	0	3	5	3	1.14401
P62301_K43	Rps13	K*GLTPSQIGVILR	RS13_MOUSE 40S ribosomal protein S13 OS=Mus musculus OX=10090 GN=Rps13 PE=1 SV=2	0	0	4	0	0	0	1.07712
P62301_K78	Rps13	SK*GLAPDLPEDLYHLIK	RS13_MOUSE 40S ribosomal protein S13 OS=Mus musculus OX=10090 GN=Rps13 PE=1 SV=2	0	0	2	0	1	0	0.998127
P62301_K93	Rps13	GLAPDLPEDLYHLIK*K	RS13_MOUSE 40S ribosomal protein S13 OS=Mus musculus OX=10090 GN=Rps13 PE=1 SV=2	0	0	0	0	1	0	1.20482
P62334_K298	Psmc6	K*IHIDLPNEQAR	PRS10_MOUSE 26S proteasome regulatory subunit 10B OS=Mus musculus OX=10090 GN=Psmc6 PE=1 SV=1	0	0	0	0	5	2	1.03293
P62334_K68	Psmc6	QLTEEK*FIVK	PRS10_MOUSE 26S proteasome regulatory subunit 10B OS=Mus musculus OX=10090 GN=Psmc6 PE=1 SV=1	0	0	0	0	0	1	1.08696
P62492_K58	Rab11a	SIQVDGK*TIK	RB11A_MOUSE Ras-related protein Rab-11A OS=Mus musculus OX=10090 GN=Rab11a PE=1 SV=3	0	0	0	0	0	2	1.25978
P62702_K233	Rps4x	GNK*PWISLPR	RS4X_MOUSE 40S ribosomal protein S4, X isoform OS=Mus musculus OX=10090 GN=Rps4x PE=1 SV=2	0	0	2	1	1	0	0.995162
P62702_K37	Rps4x	PSTGPHK*LR	RS4X_MOUSE 40S ribosomal protein S4, X isoform OS=Mus musculus OX=10090 GN=Rps4x PE=1 SV=2	0	0	0	0	2	3	0.939286
P62702_K71	Rps4x	FIK*IDGK	RS4X_MOUSE 40S ribosomal protein S4, X isoform OS=Mus musculus OX=10090 GN=Rps4x PE=1 SV=2	0	0	0	0	0	4	1.11135
P62717_K11	Rpl18a	EYK*VVGR YK*VVGR	RL18A_MOUSE 60S ribosomal protein L18a OS=Mus musculus OX=10090 GN=Rpl18a PE=1 SV=1	0	0	0	5	1	4	1.08604
P62717_K128	Rpl18a	AHSIQIMK*VEEIAAGK	RL18A_MOUSE 60S ribosomal protein L18a OS=Mus musculus OX=10090 GN=Rpl18a PE=1 SV=1	0	0	0	0	3	0	0.912697
P62751_K115	Rpl23a	K*LYDIDVAK	RL23A_MOUSE 60S ribosomal protein L23a OS=Mus musculus OX=10090 GN=Rpl23a PE=1 SV=1	0	0	0	0	2	2	1.08705
P62751_K7	Rpl23a	K*EAPAPPK	RL23A_MOUSE 60S ribosomal protein L23a OS=Mus musculus OX=10090 GN=Rpl23a PE=1 SV=1	0	0	1	4	0	1	0.892867
P62754_K119	Rps6	KGEK*DIPGLTDTTVPR	RS6_MOUSE 40S ribosomal protein S6 OS=Mus musculus OX=10090 GN=Rps6 PE=1 SV=1	0	0	2	1	5	1	1.01038
P62754_K203	Rps6	NK*EEAAEYAK	RS6_MOUSE 40S ribosomal protein S6 OS=Mus musculus OX=10090 GN=Rps6 PE=1 SV=1	0	0	1	0	0	2	0.92822
P62754_K211	Rps6	NKEEAAEYAK*LLAK	RS6_MOUSE 40S ribosomal protein S6 OS=Mus musculus OX=10090 GN=Rps6 PE=1 SV=1	0	0	1	3	5	2	1.00354
P62754_K243	Rps6	ASTSK*SESSQK	RS6_MOUSE 40S ribosomal protein S6 OS=Mus musculus OX=10090 GN=Rps6 PE=1 SV=1	0	0	2	3	1	0	1.24537
P62754_K30	Rps6	TFYEK*R	RS6_MOUSE 40S ribosomal protein S6 OS=Mus musculus OX=10090 GN=Rps6 PE=1 SV=1	0	0	0	0	3	0	0.92373
P62774_K90	Mtpn	LLLSK*GADK	MTPN_MOUSE Myotrophin OS=Mus musculus OX=10090 GN=Mtpn PE=1 SV=2	0	0	0	0	2	3	1.00386
P62806_K13	H4c1	GLGK*GGAK	H4_MOUSE Histone H4 OS=Mus musculus OX=10090 GN=H4c1 PE=1 SV=2	1	1	1	6	5	6	0.966129
P62806_K32	H4c1	DNIQGITK*PAIR	H4_MOUSE Histone H4 OS=Mus musculus OX=10090 GN=H4c1 PE=1 SV=2	0	0	0	4	0	5	0.97872
P62806_K78	H4c1	DAVTYTEHAK*R	H4_MOUSE Histone H4 OS=Mus musculus OX=10090 GN=H4c1 PE=1 SV=2	0	0	0	3	6	5	1.04278
P62806_K92	H4c1	TVTAMDVVYALK*R	H4_MOUSE Histone H4 OS=Mus musculus OX=10090 GN=H4c1 PE=1 SV=2	0	6	1	6	1	2	1.09349
P62827_K127	Ran	VDIK*DR	RAN_MOUSE GTP-binding nuclear protein Ran OS=Mus musculus OX=10090 GN=Ran PE=1 SV=3	0	0	0	4	0	5	1.0764
P62827_K60	Ran	GPIK*FNVWDTAGQEK	RAN_MOUSE GTP-binding nuclear protein Ran OS=Mus musculus OX=10090 GN=Ran PE=1 SV=3	0	0	2	0	2	1	1.05047
P62830_K113	Rpl23	GEMK*GSAITGPVAK	RL23_MOUSE 60S ribosomal protein L23 OS=Mus musculus OX=10090 GN=Rpl23 PE=1 SV=1	0	3	1	0	2	2	0.978921
P62835_K173	Rap1a	TPVEK*K	RAP1A_MOUSE Ras-related protein Rap-1A OS=Mus musculus OX=10090 GN=Rap1a PE=1 SV=1	0	0	0	0	2	0	1.12098
P62852_K14	Rps25	DAGK*SAK	RS25_MOUSE 40S ribosomal protein S25 OS=Mus musculus OX=10090 GN=Rps25 PE=1 SV=1	0	0	0	3	0	0	0.88874
P62852_K18	Rps25	K*DKDPVNK	RS25_MOUSE 40S ribosomal protein S25 OS=Mus musculus OX=10090 GN=Rps25 PE=1 SV=1	0	0	2	0	0	1	1.12383
P62852_K20	Rps25	KDK*DPVNK	RS25_MOUSE 40S ribosomal protein S25 OS=Mus musculus OX=10090 GN=Rps25 PE=1 SV=1	0	0	0	1	4	3	1.0558
P62852_K25	Rps25	KDKDPVNK*SGGK DKDPVNK*SGGK	RS25_MOUSE 40S ribosomal protein S25 OS=Mus musculus OX=10090 GN=Rps25 PE=1 SV=1	0	0	2	0	2	0	1.09146
P62852_K66	Rps25	EVPNYK*LITPAVVSER	RS25_MOUSE 40S ribosomal protein S25 OS=Mus musculus OX=10090 GN=Rps25 PE=1 SV=1	0	0	1	0	0	0	1.0989
P62852_K94	Rps25	AALQELLSK*GLIK	RS25_MOUSE 40S ribosomal protein S25 OS=Mus musculus OX=10090 GN=Rps25 PE=1 SV=1	0	3	2	6	1	1	0.998919
P62858_K10	Rps28	VQPIK*LAR	RS28_MOUSE 40S ribosomal protein S28 OS=Mus musculus OX=10090 GN=Rps28 PE=1 SV=1	0	0	0	0	0	2	0.92215
P62858_K16	Rps28	VTK*VLGR	RS28_MOUSE 40S ribosomal protein S28 OS=Mus musculus OX=10090 GN=Rps28 PE=1 SV=1	0	0	0	1	0	0	0.86957
P62867_K1	Fau	K*VHGSLAR	RS30_MUSSI 40S ribosomal protein S30 OS=Mus spicilegus OX=10103 GN=Fau PE=3 SV=1	6	0	1	0	3	2	1.05462
P62867_K51	Fau	FVNVVPTFGK*K	RS30_MUSSI 40S ribosomal protein S30 OS=Mus spicilegus OX=10103 GN=Fau PE=3 SV=1	0	0	0	5	0	1	1.11382
P62874_K15	Gnb1	QEAEQLK*NQIR	GBB1_MOUSE Guanine nucleotide-binding protein G(I)/G(S)/G(T) subunit beta-1 OS=Mus musculus OX=10090 GN=Gnb1 PE=1 SV=3	0	0	0	0	0	4	1.24642
P62889_K9	Rpl30	K*SLESINSR	RL30_MOUSE 60S ribosomal protein L30 OS=Mus musculus OX=10090 GN=Rpl30 PE=1 SV=2	0	0	2	0	0	5	0.99486
P62908_K108	Rps3	YK*LLGGLAVR	RS3_MOUSE 40S ribosomal protein S3 OS=Mus musculus OX=10090 GN=Rps3 PE=1 SV=1	0	0	1	3	0	0	1.07662
P62908_K201	Rps3	IGPK*KPLPDHVSIVEPK	RS3_MOUSE 40S ribosomal protein S3 OS=Mus musculus OX=10090 GN=Rps3 PE=1 SV=1	0	0	2	2	6	5	1.08616
P62908_K202	Rps3	IGPKK*PLPDHVSIVEPK	RS3_MOUSE 40S ribosomal protein S3 OS=Mus musculus OX=10090 GN=Rps3 PE=1 SV=1	0	0	2	0	3	1	1.04577
P62908_K62	Rps3	TQNVLGEK*GR	RS3_MOUSE 40S ribosomal protein S3 OS=Mus musculus OX=10090 GN=Rps3 PE=1 SV=1	0	0	0	2	0	6	1.09131
P62911_K109	Rpl32	K*AIVER	RL32_MOUSE 60S ribosomal protein L32 OS=Mus musculus OX=10090 GN=Rpl32 PE=1 SV=2	0	0	0	1	0	2	1.04799
P62918_K149	Rpl8	VK*LPSGSK	RL8_MOUSE 60S ribosomal protein L8 OS=Mus musculus OX=10090 GN=Rpl8 PE=1 SV=2	0	0	0	0	2	3	1.00078
P62918_K177	Rpl8	IDK*PILK	RL8_MOUSE 60S ribosomal protein L8 OS=Mus musculus OX=10090 GN=Rpl8 PE=1 SV=2	0	0	0	0	2	1	1.1981
P62962_K126	Pfn1	EGVHGGLINK*K	PROF1_MOUSE Profilin-1 OS=Mus musculus OX=10090 GN=Pfn1 PE=1 SV=2	0	0	0	0	0	1	0.87719
P62962_K54	Pfn1	TFVSITPAEVGVLVGK*DR	PROF1_MOUSE Profilin-1 OS=Mus musculus OX=10090 GN=Pfn1 PE=1 SV=2	0	0	0	2	0	0	1.26262
P62983_K11	Rps27a	TLTGK*TITLEVEPSDTIENVK	RS27A_MOUSE Ubiquitin-40S ribosomal protein S27a OS=Mus musculus OX=10090 GN=Rps27a PE=1 SV=2	0	0	4	4	5	1	1.09158
P62983_K113	Rps27a	VDENGK*ISR	RS27A_MOUSE Ubiquitin-40S ribosomal protein S27a OS=Mus musculus OX=10090 GN=Rps27a PE=1 SV=2	0	0	0	0	0	2	0.988125
P62983_K48	Rps27a	LIFAGK*QLEDGR	RS27A_MOUSE Ubiquitin-40S ribosomal protein S27a OS=Mus musculus OX=10090 GN=Rps27a PE=1 SV=2	0	6	6	6	6	6	1.02697
P62996_K28	Tra2b	SGSAHGSGK*SAR	TRA2B_MOUSE Transformer-2 protein homolog beta OS=Mus musculus OX=10090 GN=Tra2b PE=1 SV=1	0	0	0	0	2	0	1.04201
P63017_K108	Hspa8	VQVEYK*GETK	HSP7C_MOUSE Heat shock cognate 71 kDa protein OS=Mus musculus OX=10090 GN=Hspa8 PE=1 SV=1	0	1	1	6	6	6	1.0098
P63017_K112	Hspa8	GETK*SFYPEEVSSMVLTK	HSP7C_MOUSE Heat shock cognate 71 kDa protein OS=Mus musculus OX=10090 GN=Hspa8 PE=1 SV=1	0	0	4	2	6	2	0.937886
P63017_K159	Hspa8	QATK*DAGTIAGLNVLR	HSP7C_MOUSE Heat shock cognate 71 kDa protein OS=Mus musculus OX=10090 GN=Hspa8 PE=1 SV=1	0	0	2	1	0	4	0.962397
P63017_K187	Hspa8	IINEPTAAAIAYGLDK*K	HSP7C_MOUSE Heat shock cognate 71 kDa protein OS=Mus musculus OX=10090 GN=Hspa8 PE=1 SV=1	0	1	1	1	1	0	1.10858
P63017_K188	Hspa8	K*VGAER	HSP7C_MOUSE Heat shock cognate 71 kDa protein OS=Mus musculus OX=10090 GN=Hspa8 PE=1 SV=1	0	0	2	1	0	4	0.966364
P63017_K251	Hspa8	K*DISENKR	HSP7C_MOUSE Heat shock cognate 71 kDa protein OS=Mus musculus OX=10090 GN=Hspa8 PE=1 SV=1	0	2	5	6	6	6	1.05232
P63017_K257	Hspa8	DISENK*R	HSP7C_MOUSE Heat shock cognate 71 kDa protein OS=Mus musculus OX=10090 GN=Hspa8 PE=1 SV=1	0	0	0	3	0	2	0.936848
P63017_K319	Hspa8	GTLDPVEK*ALR	HSP7C_MOUSE Heat shock cognate 71 kDa protein OS=Mus musculus OX=10090 GN=Hspa8 PE=1 SV=1	0	0	0	1	0	6	0.966881
P63017_K451	Hspa8	AMTK*DNNLLGK	HSP7C_MOUSE Heat shock cognate 71 kDa protein OS=Mus musculus OX=10090 GN=Hspa8 PE=1 SV=1	0	0	1	1	1	1	0.950675
P63017_K458	Hspa8	DNNLLGK*FELTGIPPAPR	HSP7C_MOUSE Heat shock cognate 71 kDa protein OS=Mus musculus OX=10090 GN=Hspa8 PE=1 SV=1	0	0	0	0	0	1	0.67114
P63017_K497	Hspa8	STGK*ENK	HSP7C_MOUSE Heat shock cognate 71 kDa protein OS=Mus musculus OX=10090 GN=Hspa8 PE=1 SV=1	0	0	0	1	1	1	0.958833
P63017_K500	Hspa8	ENK*ITITNDK	HSP7C_MOUSE Heat shock cognate 71 kDa protein OS=Mus musculus OX=10090 GN=Hspa8 PE=1 SV=1	0	0	1	0	0	1	0.978485
P63017_K512	Hspa8	LSK*EDIER	HSP7C_MOUSE Heat shock cognate 71 kDa protein OS=Mus musculus OX=10090 GN=Hspa8 PE=1 SV=1	0	0	1	6	4	5	0.978024
P63017_K524	Hspa8	MVQEAEK*YK	HSP7C_MOUSE Heat shock cognate 71 kDa protein OS=Mus musculus OX=10090 GN=Hspa8 PE=1 SV=1	0	1	1	6	6	5	1.01552
P63017_K531	Hspa8	YKAEDEK*QR	HSP7C_MOUSE Heat shock cognate 71 kDa protein OS=Mus musculus OX=10090 GN=Hspa8 PE=1 SV=1	0	0	1	1	4	1	1.09848
P63017_K535	Hspa8	DK*VSSK	HSP7C_MOUSE Heat shock cognate 71 kDa protein OS=Mus musculus OX=10090 GN=Hspa8 PE=1 SV=1	0	0	0	6	4	4	0.96344
P63017_K56	Hspa8	LIGDAAK*NQVAMNPTNTVFDAK	HSP7C_MOUSE Heat shock cognate 71 kDa protein OS=Mus musculus OX=10090 GN=Hspa8 PE=1 SV=1	0	0	6	5	5	5	1.00454
P63017_K589	Hspa8	NQTAEK*EEFEHQQK	HSP7C_MOUSE Heat shock cognate 71 kDa protein OS=Mus musculus OX=10090 GN=Hspa8 PE=1 SV=1	0	0	2	0	4	3	1.09522
P63017_K597	Hspa8	NQTAEKEEFEHQQK*ELEK EEFEHQQK*ELEK	HSP7C_MOUSE Heat shock cognate 71 kDa protein OS=Mus musculus OX=10090 GN=Hspa8 PE=1 SV=1	0	0	5	4	6	5	0.998127
P63017_K601	Hspa8	ELEK*VCNPIITK	HSP7C_MOUSE Heat shock cognate 71 kDa protein OS=Mus musculus OX=10090 GN=Hspa8 PE=1 SV=1	0	0	0	0	0	1	0.92593
P63028_K112	Tpt1	VK*PFMTGAAEQIK	TCTP_MOUSE Translationally-controlled tumor protein OS=Mus musculus OX=10090 GN=Tpt1 PE=1 SV=1	0	0	0	0	0	1	1.17647
P63028_K19	Tpt1	DLISHDELFSDIYK*IR	TCTP_MOUSE Translationally-controlled tumor protein OS=Mus musculus OX=10090 GN=Tpt1 PE=1 SV=1	0	0	0	0	2	0	0.95562
P63028_K93	Tpt1	YIK*DYMK	TCTP_MOUSE Translationally-controlled tumor protein OS=Mus musculus OX=10090 GN=Tpt1 PE=1 SV=1	0	0	0	0	6	3	0.922446
P63037_K23	Dnaja1	ETTYYDVLGVKPNATQEELK*K	DNJA1_MOUSE DnaJ homolog subfamily A member 1 OS=Mus musculus OX=10090 GN=Dnaja1 PE=1 SV=1	0	0	0	0	0	1	1.17647
P63037_K37	Dnaja1	YHPDK*NPNEGEK	DNJA1_MOUSE DnaJ homolog subfamily A member 1 OS=Mus musculus OX=10090 GN=Dnaja1 PE=1 SV=1	0	0	0	0	4	0	1.01362
P63037_K44	Dnaja1	NPNEGEK*FK	DNJA1_MOUSE DnaJ homolog subfamily A member 1 OS=Mus musculus OX=10090 GN=Dnaja1 PE=1 SV=1	0	0	0	0	0	2	0.96491
P63037_K66	Dnaja1	ELYDK*GGEQAIK	DNJA1_MOUSE DnaJ homolog subfamily A member 1 OS=Mus musculus OX=10090 GN=Dnaja1 PE=1 SV=1	0	0	0	0	0	2	0.79445
P63038_K125	Hspd1	SIAK*EGFEK	CH60_MOUSE 60 kDa heat shock protein, mitochondrial OS=Mus musculus OX=10090 GN=Hspd1 PE=1 SV=1	0	0	0	1	0	2	0.828513
P63038_K130	Hspd1	EGFEK*ISK	CH60_MOUSE 60 kDa heat shock protein, mitochondrial OS=Mus musculus OX=10090 GN=Hspd1 PE=1 SV=1	0	0	0	6	5	6	1.03028
P63038_K133	Hspd1	ISK*GANPVEIR	CH60_MOUSE 60 kDa heat shock protein, mitochondrial OS=Mus musculus OX=10090 GN=Hspd1 PE=1 SV=1	0	0	4	6	1	6	1.01623
P63038_K196	Hspd1	K*GVITVK	CH60_MOUSE 60 kDa heat shock protein, mitochondrial OS=Mus musculus OX=10090 GN=Hspd1 PE=1 SV=1	0	0	0	3	1	1	0.942286
P63038_K202	Hspd1	KGVITVK*DGK	CH60_MOUSE 60 kDa heat shock protein, mitochondrial OS=Mus musculus OX=10090 GN=Hspd1 PE=1 SV=1	0	0	6	6	6	6	1.0603
P63038_K205	Hspd1	DGK*TLNDELEIIEGMK	CH60_MOUSE 60 kDa heat shock protein, mitochondrial OS=Mus musculus OX=10090 GN=Hspd1 PE=1 SV=1	0	0	0	0	1	0	1.07527
P63038_K236	Hspd1	GQK*CEFQDAYVLLSEK	CH60_MOUSE 60 kDa heat shock protein, mitochondrial OS=Mus musculus OX=10090 GN=Hspd1 PE=1 SV=1	0	0	0	0	2	0	0.905285
P63038_K359	Hspd1	DDAMLLK*GK	CH60_MOUSE 60 kDa heat shock protein, mitochondrial OS=Mus musculus OX=10090 GN=Hspd1 PE=1 SV=1	0	0	0	3	3	4	1.0254
P63038_K364	Hspd1	GDK*AHIEK	CH60_MOUSE 60 kDa heat shock protein, mitochondrial OS=Mus musculus OX=10090 GN=Hspd1 PE=1 SV=1	0	0	0	0	5	2	0.963413
P63038_K396	Hspd1	LAK*LSDGVAVLK	CH60_MOUSE 60 kDa heat shock protein, mitochondrial OS=Mus musculus OX=10090 GN=Hspd1 PE=1 SV=1	0	0	0	0	0	4	0.951
P63038_K469	Hspd1	IGIEIIK*R	CH60_MOUSE 60 kDa heat shock protein, mitochondrial OS=Mus musculus OX=10090 GN=Hspd1 PE=1 SV=1	0	0	0	2	0	0	0.89463
P63038_K473	Hspd1	ALK*IPAMTIAK	CH60_MOUSE 60 kDa heat shock protein, mitochondrial OS=Mus musculus OX=10090 GN=Hspd1 PE=1 SV=1	0	0	5	5	4	5	0.977569
P63038_K87	Hspd1	SIDLK*DK	CH60_MOUSE 60 kDa heat shock protein, mitochondrial OS=Mus musculus OX=10090 GN=Hspd1 PE=1 SV=1	0	0	0	1	5	4	0.909806
P63073_K212	Eif4e	SGSTTK*NR	IF4E_MOUSE Eukaryotic translation initiation factor 4E OS=Mus musculus OX=10090 GN=Eif4e PE=1 SV=1	0	0	0	1	0	0	1.14943
P63085_K201	Mapk1	APEIMLNSK*GYTK	MK01_MOUSE Mitogen-activated protein kinase 1 OS=Mus musculus OX=10090 GN=Mapk1 PE=1 SV=3	0	0	0	0	1	0	1.31579
P63101_K157	Ywhaz	GIVDQSQQAYQEAFEISK*K	1433Z_MOUSE 14-3-3 protein zeta/delta OS=Mus musculus OX=10090 GN=Ywhaz PE=1 SV=1	0	0	0	1	2	0	0.967187
P63101_K68	Ywhaz	VVSSIEQK*TEGAEK	1433Z_MOUSE 14-3-3 protein zeta/delta OS=Mus musculus OX=10090 GN=Ywhaz PE=1 SV=1	0	0	5	6	5	5	1.01215
P63101_K75	Ywhaz	K*QQMAR	1433Z_MOUSE 14-3-3 protein zeta/delta OS=Mus musculus OX=10090 GN=Ywhaz PE=1 SV=1	0	0	1	4	0	3	0.881009
P63101_K85	Ywhaz	EK*IETELR	1433Z_MOUSE 14-3-3 protein zeta/delta OS=Mus musculus OX=10090 GN=Ywhaz PE=1 SV=1	0	0	1	1	3	5	1.07227
P63101_K9	Ywhaz	NELVQK*AK	1433Z_MOUSE 14-3-3 protein zeta/delta OS=Mus musculus OX=10090 GN=Ywhaz PE=1 SV=1	0	0	0	6	6	6	1.03825
P63158_K114	Hmgb1	IK*GEHPGLSIGDVAK	HMGB1_MOUSE High mobility group protein B1 OS=Mus musculus OX=10090 GN=Hmgb1 PE=1 SV=2	0	0	0	0	0	1	0.75188
P63158_K127	Hmgb1	GEHPGLSIGDVAK*K	HMGB1_MOUSE High mobility group protein B1 OS=Mus musculus OX=10090 GN=Hmgb1 PE=1 SV=2	0	0	0	0	4	4	1.08594
P63158_K128	Hmgb1	K*LGEMWNNTAADDKQPYEK K*LGEMWNNTAADDK	HMGB1_MOUSE High mobility group protein B1 OS=Mus musculus OX=10090 GN=Hmgb1 PE=1 SV=2	0	0	2	0	4	5	0.9684
P63158_K165	Hmgb1	AK*GKPDAAK	HMGB1_MOUSE High mobility group protein B1 OS=Mus musculus OX=10090 GN=Hmgb1 PE=1 SV=2	0	1	1	5	3	2	1.03875
P63158_K167	Hmgb1	GK*PDAAK	HMGB1_MOUSE High mobility group protein B1 OS=Mus musculus OX=10090 GN=Hmgb1 PE=1 SV=2	0	0	0	1	1	0	0.910205
P63158_K177	Hmgb1	GVVK*AEK	HMGB1_MOUSE High mobility group protein B1 OS=Mus musculus OX=10090 GN=Hmgb1 PE=1 SV=2	0	0	0	1	2	1	0.915305
P63158_K3	Hmgb1	GK*GDPK	HMGB1_MOUSE High mobility group protein B1 OS=Mus musculus OX=10090 GN=Hmgb1 PE=1 SV=2	0	0	0	0	0	1	0.89286
P63158_K30	Hmgb1	K*HPDASVNFSEFSK	HMGB1_MOUSE High mobility group protein B1 OS=Mus musculus OX=10090 GN=Hmgb1 PE=1 SV=2	0	1	4	5	6	6	1.05597
P63158_K59	Hmgb1	GK*FEDMAK	HMGB1_MOUSE High mobility group protein B1 OS=Mus musculus OX=10090 GN=Hmgb1 PE=1 SV=2	0	0	1	3	1	3	1.00747
P63158_K7	Hmgb1	GDPK*KPR	HMGB1_MOUSE High mobility group protein B1 OS=Mus musculus OX=10090 GN=Hmgb1 PE=1 SV=2	0	0	0	0	1	0	0.93458
P63158_K90	Hmgb1	FK*DPNAPK	HMGB1_MOUSE High mobility group protein B1 OS=Mus musculus OX=10090 GN=Hmgb1 PE=1 SV=2	0	0	0	1	5	2	0.947983
P63166_K37	Sumo1	VIGQDSSEIHFK*VK	SUMO1_MOUSE Small ubiquitin-related modifier 1 OS=Mus musculus OX=10090 GN=Sumo1 PE=1 SV=1	0	0	0	0	4	5	1.00067
P63168_K36	Dynll1	YNIEK*DIAAHIK	DYL1_MOUSE Dynein light chain 1, cytoplasmic OS=Mus musculus OX=10090 GN=Dynll1 PE=1 SV=1	0	0	0	0	6	0	1.13941
P63242_K121	Eif5a	LPEGDLGK*EIEQK	IF5A1_MOUSE Eukaryotic translation initiation factor 5A-1 OS=Mus musculus OX=10090 GN=Eif5a PE=1 SV=2	0	0	2	2	0	5	0.994289
P63242_K27	Eif5a	K*NGFVVLK	IF5A1_MOUSE Eukaryotic translation initiation factor 5A-1 OS=Mus musculus OX=10090 GN=Eif5a PE=1 SV=2	0	0	0	4	0	1	1.07156
P63242_K68	Eif5a	K*YEDICPSTHNMDVPNIK	IF5A1_MOUSE Eukaryotic translation initiation factor 5A-1 OS=Mus musculus OX=10090 GN=Eif5a PE=1 SV=2	0	0	0	0	0	1	0.83333
P63276_K72	Rps17	GISIK*LQEEER	RS17_MOUSE 40S ribosomal protein S17 OS=Mus musculus OX=10090 GN=Rps17 PE=1 SV=2	0	0	0	0	0	1	1.49254
P63280_K18	Ube2i	K*DHPFGFVAVPTK	UBC9_MOUSE SUMO-conjugating enzyme UBC9 OS=Mus musculus OX=10090 GN=Ube2i PE=1 SV=1	0	0	0	0	6	1	1.02426
P63323_K116	Rps12	DYGK*ESQAK	RS12_MOUSE 40S ribosomal protein S12 OS=Mus musculus OX=10090 GN=Rps12 PE=1 SV=2	0	0	0	1	0	0	1
P63325_K139	Rps10	K*AEAGAGSATEFQFR	RS10_MOUSE 40S ribosomal protein S10 OS=Mus musculus OX=10090 GN=Rps10 PE=1 SV=1	0	0	1	0	0	2	0.95902
P63330_K34	Ppp2ca	SLCEK*AK	PP2AA_MOUSE Serine/threonine-protein phosphatase 2A catalytic subunit alpha isoform OS=Mus musculus OX=10090 GN=Ppp2ca PE=1 SV=1	0	0	0	0	1	0	1.25
P67778_K202	Phb	FVVEK*AEQQK	PHB_MOUSE Prohibitin OS=Mus musculus OX=10090 GN=Phb PE=1 SV=1	0	0	0	2	2	5	0.959706
P67871_K212	Csnk2b	SPVK*TIR	CSK2B_MOUSE Casein kinase II subunit beta OS=Mus musculus OX=10090 GN=Csnk2b PE=1 SV=1	0	0	0	0	0	2	0.96729
P67984_K10	Rpl22	LVAK*GGK	RL22_MOUSE 60S ribosomal protein L22 OS=Mus musculus OX=10090 GN=Rpl22 PE=1 SV=2	0	0	0	0	0	2	1.07601
P68033_K293	Actc1	K*DLYANNVLSGGTTMYPGIADR	ACTC_MOUSE Actin, alpha cardiac muscle 1 OS=Mus musculus OX=10090 GN=Actc1 PE=1 SV=1	0	1	0	0	0	0	0.88673
P68033_K70	Actc1	GILTLK*YPIEHGIITNWDDMEK	ACTC_MOUSE Actin, alpha cardiac muscle 1 OS=Mus musculus OX=10090 GN=Actc1 PE=1 SV=1	0	0	0	0	2	0	1.12592
P68037_K138	Ube2l3	FCK*NAEEFTK	UB2L3_MOUSE Ubiquitin-conjugating enzyme E2 L3 OS=Mus musculus OX=10090 GN=Ube2l3 PE=1 SV=1	0	0	0	0	0	1	1.26582
P68037_K20	Ube2l3	CGMK*NFR	UB2L3_MOUSE Ubiquitin-conjugating enzyme E2 L3 OS=Mus musculus OX=10090 GN=Ube2l3 PE=1 SV=1	0	0	0	0	1	4	1.11859
P68037_K73	Ube2l3	TK*IYHPNIDEK	UB2L3_MOUSE Ubiquitin-conjugating enzyme E2 L3 OS=Mus musculus OX=10090 GN=Ube2l3 PE=1 SV=1	0	1	1	1	6	3	1.01491
P68037_K9	Ube2l3	LMK*ELEEIR	UB2L3_MOUSE Ubiquitin-conjugating enzyme E2 L3 OS=Mus musculus OX=10090 GN=Ube2l3 PE=1 SV=1	0	0	0	0	0	5	0.91467
P68040_K271	Rack1	IIVDELK*QEVISTSSK	RACK1_MOUSE Receptor of activated protein C kinase 1 OS=Mus musculus OX=10090 GN=Rack1 PE=1 SV=3	0	0	1	0	0	0	1.28205
P68181_K293	Prkacb	NGVSDIK*THK	KAPCB_MOUSE cAMP-dependent protein kinase catalytic subunit beta OS=Mus musculus OX=10090 GN=Prkacb PE=1 SV=2	0	0	0	0	2	2	0.92728
P68254_K68	Ywhaq	VISSIEQK*TDTSDKK	1433T_MOUSE 14-3-3 protein theta OS=Mus musculus OX=10090 GN=Ywhaq PE=1 SV=1	0	0	0	0	0	1	1.40845
P68254_K85	Ywhaq	EK*VESELR	1433T_MOUSE 14-3-3 protein theta OS=Mus musculus OX=10090 GN=Ywhaq PE=1 SV=1	0	0	0	0	0	1	1.04167
P68254_K9	Ywhaq	TELIQK*AK	1433T_MOUSE 14-3-3 protein theta OS=Mus musculus OX=10090 GN=Ywhaq PE=1 SV=1	0	0	0	6	6	6	1.01866
P68368_K336	Tuba4a	DVNAAIAAIK*TK	TBA4A_MOUSE Tubulin alpha-4A chain OS=Mus musculus OX=10090 GN=Tuba4a PE=1 SV=1	0	0	0	4	2	0	1.17792
P68369_K326	Tuba1a	GDVVPK*DVNAAIATIK	TBA1A_MOUSE Tubulin alpha-1A chain OS=Mus musculus OX=10090 GN=Tuba1a PE=1 SV=1	0	0	1	1	1	2	1.0773
P68369_K336	Tuba1a	DVNAAIATIK*TK	TBA1A_MOUSE Tubulin alpha-1A chain OS=Mus musculus OX=10090 GN=Tuba1a PE=1 SV=1	0	1	1	2	1	2	1.10498
P68369_K60	Tuba1a	TIGGGDDSFNTFFSETGAGK*HVPR	TBA1A_MOUSE Tubulin alpha-1A chain OS=Mus musculus OX=10090 GN=Tuba1a PE=1 SV=1	0	0	0	0	1	1	1.06656
P68433_K123	H3c1	VTIMPK*DIQLAR	H31_MOUSE Histone H3.1 OS=Mus musculus OX=10090 GN=H3c1 PE=1 SV=2	0	2	5	4	2	5	0.965304
P68433_K15	H3c1	STGGK*APR	H31_MOUSE Histone H3.1 OS=Mus musculus OX=10090 GN=H3c1 PE=1 SV=2	0	0	0	3	1	5	0.995837
P68433_K24	H3c1	QLATK*AAR	H31_MOUSE Histone H3.1 OS=Mus musculus OX=10090 GN=H3c1 PE=1 SV=2	0	2	1	4	5	5	1.0627
P68433_K28	H3c1	K*SAPATGGVK	H31_MOUSE Histone H3.1 OS=Mus musculus OX=10090 GN=H3c1 PE=1 SV=2	0	1	3	2	2	2	0.96681
P68433_K57	H3c1	YQK*STELLIR	H31_MOUSE Histone H3.1 OS=Mus musculus OX=10090 GN=H3c1 PE=1 SV=2	0	0	4	1	0	2	1.0469
P68433_K65	H3c1	K*LPFQR	H31_MOUSE Histone H3.1 OS=Mus musculus OX=10090 GN=H3c1 PE=1 SV=2	0	0	0	1	0	2	1.031
P68433_K80	H3c1	EIAQDFK*TDLR	H31_MOUSE Histone H3.1 OS=Mus musculus OX=10090 GN=H3c1 PE=1 SV=2	0	1	3	5	5	4	1.09478
P68510_K142	Ywhah	YLAEVASGEK*K	1433F_MOUSE 14-3-3 protein eta OS=Mus musculus OX=10090 GN=Ywhah PE=1 SV=2	0	0	0	2	0	1	1.23739
P70168_K73	Kpnb1	DPDIK*AQYQQR	IMB1_MOUSE Importin subunit beta-1 OS=Mus musculus OX=10090 GN=Kpnb1 PE=1 SV=2	0	0	0	0	1	0	1.02476
P70268_K287	Pkn1	LGELPADHPK*GR	PKN1_MOUSE Serine/threonine-protein kinase N1 OS=Mus musculus OX=10090 GN=Pkn1 PE=1 SV=3	0	0	0	0	0	1	0.86957
P70268_K611	Pkn1	K*SPLTLEDFK	PKN1_MOUSE Serine/threonine-protein kinase N1 OS=Mus musculus OX=10090 GN=Pkn1 PE=1 SV=3	0	0	0	0	0	3	0.845653
P70290_K281	Mpp1	LPAFK*R	EM55_MOUSE 55 kDa erythrocyte membrane protein OS=Mus musculus OX=10090 GN=Mpp1 PE=1 SV=1	0	0	0	0	0	1	0.88496
P70333_K349	Hnrnph2	DK*ANMQHR	HNRH2_MOUSE Heterogeneous nuclear ribonucleoprotein H2 OS=Mus musculus OX=10090 GN=Hnrnph2 PE=1 SV=1	0	0	1	0	0	0	0.88496
P70444_K129	Bid	NCLAK*ALDEVK	BID_MOUSE BH3-interacting domain death agonist OS=Mus musculus OX=10090 GN=Bid PE=1 SV=2	0	0	0	0	3	4	0.980664
P70460_K307	Vasp	RPWEK*NSTTLPR	VASP_MOUSE Vasodilator-stimulated phosphoprotein OS=Mus musculus OX=10090 GN=Vasp PE=1 SV=4	0	0	0	0	2	0	1.21324
P70460_K343	Vasp	VK*QELLEEVRK	VASP_MOUSE Vasodilator-stimulated phosphoprotein OS=Mus musculus OX=10090 GN=Vasp PE=1 SV=4	0	0	2	1	0	3	1.12716
P70670_K2114	Naca	IEDLSQQAQLAAAEK*FK	NACAM_MOUSE Nascent polypeptide-associated complex subunit alpha, muscle-specific form OS=Mus musculus OX=10090 GN=Naca PE=1 SV=2	0	0	0	3	2	1	1.12489
P70698_K557	Ctps1	LPHYLQK*GCR	PYRG1_MOUSE CTP synthase 1 OS=Mus musculus OX=10090 GN=Ctps1 PE=1 SV=2	0	0	0	0	3	0	0.8394
P80313_K135	Cct7	TATQLAVNK*IK	TCPH_MOUSE T-complex protein 1 subunit eta OS=Mus musculus OX=10090 GN=Cct7 PE=1 SV=1	0	0	0	0	0	1	1.04167
P80313_K145	Cct7	K*QDKVEQR	TCPH_MOUSE T-complex protein 1 subunit eta OS=Mus musculus OX=10090 GN=Cct7 PE=1 SV=1	0	0	1	0	0	0	0.9434
P80313_K250	Cct7	AEK*DNAEIR	TCPH_MOUSE T-complex protein 1 subunit eta OS=Mus musculus OX=10090 GN=Cct7 PE=1 SV=1	0	0	0	0	0	1	1.31579
P80313_K55	Cct7	GK*ATISNDGATILK	TCPH_MOUSE T-complex protein 1 subunit eta OS=Mus musculus OX=10090 GN=Cct7 PE=1 SV=1	0	0	0	0	0	5	0.961378
P80314_K248	Cct2	ILIANTGMDTDK*IK	TCPB_MOUSE T-complex protein 1 subunit beta OS=Mus musculus OX=10090 GN=Cct2 PE=1 SV=4	0	0	0	0	3	4	0.907491
P80314_K272	Cct2	VAEIEHAEK*EK	TCPB_MOUSE T-complex protein 1 subunit beta OS=Mus musculus OX=10090 GN=Cct2 PE=1 SV=4	0	0	0	0	2	3	0.996716
P80314_K522	Cct2	VDNIIK*AAPR	TCPB_MOUSE T-complex protein 1 subunit beta OS=Mus musculus OX=10090 GN=Cct2 PE=1 SV=4	0	0	0	0	0	4	1.02095
P80315_K21	Cct4	GK*SAYQDR	TCPD_MOUSE T-complex protein 1 subunit delta OS=Mus musculus OX=10090 GN=Cct4 PE=1 SV=3	0	0	1	3	0	0	1.05711
P80315_K395	Cct4	GSNK*LVIEEAER	TCPD_MOUSE T-complex protein 1 subunit delta OS=Mus musculus OX=10090 GN=Cct4 PE=1 SV=3	0	0	0	0	3	0	0.919563
P80315_K55	Cct4	TSLGPK*GMDK	TCPD_MOUSE T-complex protein 1 subunit delta OS=Mus musculus OX=10090 GN=Cct4 PE=1 SV=3	0	0	0	0	0	1	1.20482
P80316_K214	Cct5	VEGK*VGGR	TCPE_MOUSE T-complex protein 1 subunit epsilon OS=Mus musculus OX=10090 GN=Cct5 PE=1 SV=1	0	0	0	1	0	3	0.81479
P80316_K223	Cct5	LEDTK*LIK	TCPE_MOUSE T-complex protein 1 subunit epsilon OS=Mus musculus OX=10090 GN=Cct5 PE=1 SV=1	0	0	0	6	6	6	1.03081
P80316_K259	Cct5	IAILTCPFEPPK*PK	TCPE_MOUSE T-complex protein 1 subunit epsilon OS=Mus musculus OX=10090 GN=Cct5 PE=1 SV=1	0	0	0	0	0	1	1.38889
P80316_K279	Cct5	ALQK*YEK	TCPE_MOUSE T-complex protein 1 subunit epsilon OS=Mus musculus OX=10090 GN=Cct5 PE=1 SV=1	0	0	0	0	1	0	0.81301
P80316_K392	Cct5	GGNK*MIIEEAK	TCPE_MOUSE T-complex protein 1 subunit epsilon OS=Mus musculus OX=10090 GN=Cct5 PE=1 SV=1	0	0	0	0	2	0	1.41068
P80317_K10	Cct6a	TLNPK*AEVAR	TCPZ_MOUSE T-complex protein 1 subunit zeta OS=Mus musculus OX=10090 GN=Cct6a PE=1 SV=3	0	0	0	2	0	4	0.90874
P80317_K127	Cct6a	IITEGFEAAK*EK	TCPZ_MOUSE T-complex protein 1 subunit zeta OS=Mus musculus OX=10090 GN=Cct6a PE=1 SV=3	0	0	0	6	6	5	1.01616
P80317_K129	Cct6a	IITEGFEAAKEK*	TCPZ_MOUSE T-complex protein 1 subunit zeta OS=Mus musculus OX=10090 GN=Cct6a PE=1 SV=3	0	0	0	1	0	2	1.12298
P80317_K138	Cct6a	ALQFLEQVK*VSK	TCPZ_MOUSE T-complex protein 1 subunit zeta OS=Mus musculus OX=10090 GN=Cct6a PE=1 SV=3	0	0	0	1	2	0	1.14072
P80317_K199	Cct6a	HK*SETDTSLIR	TCPZ_MOUSE T-complex protein 1 subunit zeta OS=Mus musculus OX=10090 GN=Cct6a PE=1 SV=3	0	0	2	2	6	3	1.14841
P80317_K261	Cct6a	LVK*AER	TCPZ_MOUSE T-complex protein 1 subunit zeta OS=Mus musculus OX=10090 GN=Cct6a PE=1 SV=3	0	0	0	1	0	2	1.23651
P80317_K287	Cct6a	VCGDSDK*GFVVINQK	TCPZ_MOUSE T-complex protein 1 subunit zeta OS=Mus musculus OX=10090 GN=Cct6a PE=1 SV=3	0	0	2	0	0	4	1.0351
P80317_K377	Cct6a	SVTLLVK*GPNK	TCPZ_MOUSE T-complex protein 1 subunit zeta OS=Mus musculus OX=10090 GN=Cct6a PE=1 SV=3	0	0	1	4	6	5	0.998135
P80318_K21	Cct3	K*VQSGNINAAK	TCPG_MOUSE T-complex protein 1 subunit gamma OS=Mus musculus OX=10090 GN=Cct3 PE=1 SV=1	0	0	0	0	0	3	1.14931
P80318_K249	Cct3	K*GESQTDIEITR	TCPG_MOUSE T-complex protein 1 subunit gamma OS=Mus musculus OX=10090 GN=Cct3 PE=1 SV=1	0	0	2	0	0	3	0.917348
P80318_K353	Cct3	IVSRPEELREDDVGTGAGLLEIK*K	TCPG_MOUSE T-complex protein 1 subunit gamma OS=Mus musculus OX=10090 GN=Cct3 PE=1 SV=1	0	0	1	5	4	3	1.00209
P80318_K527	Cct3	IDDIVSGHK*K	TCPG_MOUSE T-complex protein 1 subunit gamma OS=Mus musculus OX=10090 GN=Cct3 PE=1 SV=1	0	0	0	0	6	0	1.10665
P83741_K1652	Wnk1	TLEEK*LR	WNK1_MOUSE Serine/threonine-protein kinase WNK1 OS=Mus musculus OX=10090 GN=Wnk1 PE=1 SV=2	0	0	0	0	3	0	1.09161
P83882_K27	Rpl36a	VTQYK*K	RL36A_MOUSE 60S ribosomal protein L36a OS=Mus musculus OX=10090 GN=Rpl36a PE=3 SV=2	0	0	0	0	1	0	1.16279
P84099_K153	Rpl19	K*LLADQAEAR	RL19_MOUSE 60S ribosomal protein L19 OS=Mus musculus OX=10090 GN=Rpl19 PE=1 SV=1	0	0	1	0	0	2	1.06356
P84099_K186	Rpl19	KEEIIK*TLSK	RL19_MOUSE 60S ribosomal protein L19 OS=Mus musculus OX=10090 GN=Rpl19 PE=1 SV=1	0	0	0	0	0	3	0.98252
P84099_K190	Rpl19	TLSK*EEETKK	RL19_MOUSE 60S ribosomal protein L19 OS=Mus musculus OX=10090 GN=Rpl19 PE=1 SV=1	0	0	1	1	1	2	1.10801
P84099_K65	Rpl19	K*NTLAR	RL19_MOUSE 60S ribosomal protein L19 OS=Mus musculus OX=10090 GN=Rpl19 PE=1 SV=1	0	0	1	3	0	0	0.963075
P84104_K85	Srsf3	VELSNGEK*R	SRSF3_MOUSE Serine/arginine-rich splicing factor 3 OS=Mus musculus OX=10090 GN=Srsf3 PE=1 SV=1	0	1	1	6	4	6	1.01607
P97310_K742	Mcm2	LNQMDQDK*VAR	MCM2_MOUSE DNA replication licensing factor MCM2 OS=Mus musculus OX=10090 GN=Mcm2 PE=1 SV=3	0	0	0	0	0	3	0.982597
P97311_K205	Mcm6	FVDFQK*VR	MCM6_MOUSE DNA replication licensing factor MCM6 OS=Mus musculus OX=10090 GN=Mcm6 PE=1 SV=1	0	0	0	0	0	2	1.13607
P97329_K748	Kif20a	TELQK*LGQSLQSAER	KI20A_MOUSE Kinesin-like protein KIF20A OS=Mus musculus OX=10090 GN=Kif20a PE=1 SV=1	0	0	0	0	2	0	1.24389
P97351_K182	Rps3a	EVQTNDLK*EVVNK	RS3A_MOUSE 40S ribosomal protein S3a OS=Mus musculus OX=10090 GN=Rps3a PE=1 SV=3	0	0	0	0	3	5	1.08256
P97351_K20	Rps3a	K*VVDPFSK	RS3A_MOUSE 40S ribosomal protein S3a OS=Mus musculus OX=10090 GN=Rps3a PE=1 SV=3	0	0	0	0	0	1	1.07527
P97351_K46	Rps3a	NIGK*TLVTR	RS3A_MOUSE 40S ribosomal protein S3a OS=Mus musculus OX=10090 GN=Rps3a PE=1 SV=3	0	0	0	0	0	5	0.908922
P97351_K56	Rps3a	TQGTK*IASDGLK	RS3A_MOUSE 40S ribosomal protein S3a OS=Mus musculus OX=10090 GN=Rps3a PE=1 SV=3	0	0	0	0	3	0	1.03348
P97351_K63	Rps3a	IASDGLK*GR	RS3A_MOUSE 40S ribosomal protein S3a OS=Mus musculus OX=10090 GN=Rps3a PE=1 SV=3	0	0	0	0	0	6	1.11222
P97351_K94	Rps3a	LITEDVQGK*NCLTNFHGMDLTR	RS3A_MOUSE 40S ribosomal protein S3a OS=Mus musculus OX=10090 GN=Rps3a PE=1 SV=3	0	0	0	0	0	1	0.86957
P97352_K85	S100a13	LIGELAK*EVR	S10AD_MOUSE Protein S100-A13 OS=Mus musculus OX=10090 GN=S100a13 PE=1 SV=1	0	0	0	1	0	4	1.12454
P97355_K16	Sms	LGAK*ADGEAILK	SPSY_MOUSE Spermine synthase OS=Mus musculus OX=10090 GN=Sms PE=1 SV=1	0	0	0	0	1	0	1.2987
P97369_K317	Ncf4	GLPSQK*R	NCF4_MOUSE Neutrophil cytosol factor 4 OS=Mus musculus OX=10090 GN=Ncf4 PE=1 SV=2	0	0	0	0	4	0	1.16164
P97371_K13	Psme1	VHPEAQAK*VDVFR	PSME1_MOUSE Proteasome activator complex subunit 1 OS=Mus musculus OX=10090 GN=Psme1 PE=1 SV=2	0	0	0	0	2	2	1.00076
P97371_K187	Psme1	GDAVAK*AAK	PSME1_MOUSE Proteasome activator complex subunit 1 OS=Mus musculus OX=10090 GN=Psme1 PE=1 SV=2	0	0	0	0	1	0	1.14943
P97376_K236	Frg1	K*DGFLHETLLDR	FRG1_MOUSE Protein FRG1 OS=Mus musculus OX=10090 GN=Frg1 PE=1 SV=2	0	0	0	0	0	1	1.03093
P97384_K406	Anxa11	DIEK*SICR	ANX11_MOUSE Annexin A11 OS=Mus musculus OX=10090 GN=Anxa11 PE=1 SV=2	0	0	0	0	0	2	0.873015
P97390_K418	Vps45	GVAEK*YR	VPS45_MOUSE Vacuolar protein sorting-associated protein 45 OS=Mus musculus OX=10090 GN=Vps45 PE=1 SV=1	0	0	0	0	0	2	1.31313
P97452_K174	Bop1	TVQDK*MTGR	BOP1_MOUSE Ribosome biogenesis protein BOP1 OS=Mus musculus OX=10090 GN=Bop1 PE=1 SV=1	0	0	0	0	4	0	1.12643
P97461_K201	Rps5	VAK*SNR	RS5_MOUSE 40S ribosomal protein S5 OS=Mus musculus OX=10090 GN=Rps5 PE=1 SV=3	0	0	0	0	0	4	1.0296
P97461_K63	Rps5	K*AQCPIVER	RS5_MOUSE 40S ribosomal protein S5 OS=Mus musculus OX=10090 GN=Rps5 PE=1 SV=3	0	0	1	0	0	4	0.8972
P97490_K1162	Adcy8	GISEQEGK*IK	ADCY8_MOUSE Adenylate cyclase type 8 OS=Mus musculus OX=10090 GN=Adcy8 PE=1 SV=2	0	1	0	0	0	0	1.02041
P97496_K739	Smarcc1	K*VQEAAR	SMRC1_MOUSE SWI/SNF complex subunit SMARCC1 OS=Mus musculus OX=10090 GN=Smarcc1 PE=1 SV=2	0	0	0	1	0	0	0.86207
P97770_K239	Thumpd3	AGEK*HCFTSNEAAR	THUM3_MOUSE THUMP domain-containing protein 3 OS=Mus musculus OX=10090 GN=Thumpd3 PE=1 SV=1	0	0	0	0	5	0	1.12518
P97770_K450	Thumpd3	AVLLTQDK*K	THUM3_MOUSE THUMP domain-containing protein 3 OS=Mus musculus OX=10090 GN=Thumpd3 PE=1 SV=1	0	0	0	0	0	1	1.38889
P97807_K289	Fh	IGFAEK*VAAK	FUMH_MOUSE Fumarate hydratase, mitochondrial OS=Mus musculus OX=10090 GN=Fh PE=1 SV=3	0	0	0	0	0	1	0.79365
P97807_K470	Fh	IAK*TAHK	FUMH_MOUSE Fumarate hydratase, mitochondrial OS=Mus musculus OX=10090 GN=Fh PE=1 SV=3	0	0	0	0	2	2	0.971988
P97807_K63	Fh	VPTDK*YYGAQTVR	FUMH_MOUSE Fumarate hydratase, mitochondrial OS=Mus musculus OX=10090 GN=Fh PE=1 SV=3	0	0	0	0	2	0	0.976005
P97822_K101	Anp32e	IK*DLSTVEALQNLK	AN32E_MOUSE Acidic leucine-rich nuclear phosphoprotein 32 family member E OS=Mus musculus OX=10090 GN=Anp32e PE=1 SV=2	0	0	0	0	0	1	0.86207
P97822_K6	Anp32e	K*INMELK	AN32E_MOUSE Acidic leucine-rich nuclear phosphoprotein 32 family member E OS=Mus musculus OX=10090 GN=Anp32e PE=1 SV=2	0	0	0	0	0	2	0.806165
P97822_K65	Anp32e	LPSLNK*LR	AN32E_MOUSE Acidic leucine-rich nuclear phosphoprotein 32 family member E OS=Mus musculus OX=10090 GN=Anp32e PE=1 SV=2	0	0	0	0	0	2	1.00206
P97855_K411	G3bp1	LNVEEK*K	G3BP1_MOUSE Ras GTPase-activating protein-binding protein 1 OS=Mus musculus OX=10090 GN=G3bp1 PE=1 SV=1	0	0	0	0	0	1	0.82645
P97855_K59	G3bp1	PADAVYGQK*EIHR	G3BP1_MOUSE Ras GTPase-activating protein-binding protein 1 OS=Mus musculus OX=10090 GN=G3bp1 PE=1 SV=1	0	0	0	0	3	2	1.19925
P99027_K41	Rplp2	ILDSVGIEADDDRLNK*VISELNGK	RLA2_MOUSE 60S acidic ribosomal protein P2 OS=Mus musculus OX=10090 GN=Rplp2 PE=1 SV=3	0	0	0	0	0	1	1.28205
P99027_K94	Rplp2	LASVPAGGAVAVSAAPGSAAPAAGSAPAAAEEK*KDEK	RLA2_MOUSE 60S acidic ribosomal protein P2 OS=Mus musculus OX=10090 GN=Rplp2 PE=1 SV=3	0	0	1	0	0	0	1.1236
P99027_K95	Rplp2	LASVPAGGAVAVSAAPGSAAPAAGSAPAAAEEKK*DEK	RLA2_MOUSE 60S acidic ribosomal protein P2 OS=Mus musculus OX=10090 GN=Rplp2 PE=1 SV=3	0	0	1	0	0	0	0.84034
Q00612_K432	G6pdx	NVK*LPDAYER	G6PD1_MOUSE Glucose-6-phosphate 1-dehydrogenase X OS=Mus musculus OX=10090 GN=G6pdx PE=1 SV=3	0	0	0	0	0	5	0.989692
Q00612_K89	G6pdx	QSEPFFK*ATPEERPK	G6PD1_MOUSE Glucose-6-phosphate 1-dehydrogenase X OS=Mus musculus OX=10090 GN=G6pdx PE=1 SV=3	0	0	1	0	0	0	1.08696
Q00612_K97	G6pdx	PK*LEEFFAR	G6PD1_MOUSE Glucose-6-phosphate 1-dehydrogenase X OS=Mus musculus OX=10090 GN=G6pdx PE=1 SV=3	0	0	0	0	0	2	0.91647
Q00731_K148	Vegfa	GKGK*GQK	VEGFA_MOUSE Vascular endothelial growth factor A OS=Mus musculus OX=10090 GN=Vegfa PE=1 SV=2	0	0	0	2	0	0	1.06217
Q01320_K341	Top2a	LVDVVK*K	TOP2A_MOUSE DNA topoisomerase 2-alpha OS=Mus musculus OX=10090 GN=Top2a PE=1 SV=2	0	0	0	0	0	1	0.7874
Q01853_K148	Vcp	K*GDIFLVR	TERA_MOUSE Transitional endoplasmic reticulum ATPase OS=Mus musculus OX=10090 GN=Vcp PE=1 SV=4	0	0	0	0	0	1	1.11111
Q01853_K288	Vcp	K*AFEEAEK	TERA_MOUSE Transitional endoplasmic reticulum ATPase OS=Mus musculus OX=10090 GN=Vcp PE=1 SV=4	0	0	0	0	0	1	0.77519
Q02053_K830	Uba1	LEELK*ATLPSPDKLPGFK	UBA1_MOUSE Ubiquitin-like modifier-activating enzyme 1 OS=Mus musculus OX=10090 GN=Uba1 PE=1 SV=1	0	0	0	0	1	0	1.44928
Q03265_K132	Atp5f1a	EGDVVK*R	ATPA_MOUSE ATP synthase subunit alpha, mitochondrial OS=Mus musculus OX=10090 GN=Atp5f1a PE=1 SV=1	0	0	0	1	0	2	1.1243
Q03265_K161	Atp5f1a	VVDALGNAIDGK*GPIGSK	ATPA_MOUSE ATP synthase subunit alpha, mitochondrial OS=Mus musculus OX=10090 GN=Atp5f1a PE=1 SV=1	0	0	0	0	0	3	1.1796
Q03265_K167	Atp5f1a	GPIGSK*TR	ATPA_MOUSE ATP synthase subunit alpha, mitochondrial OS=Mus musculus OX=10090 GN=Atp5f1a PE=1 SV=1	0	0	0	6	6	6	1.10955
Q03265_K175	Atp5f1a	VGLK*APGIIPR	ATPA_MOUSE ATP synthase subunit alpha, mitochondrial OS=Mus musculus OX=10090 GN=Atp5f1a PE=1 SV=1	0	0	0	0	3	2	0.992132
Q03265_K305	Atp5f1a	DNGK*HALIIYDDLSK	ATPA_MOUSE ATP synthase subunit alpha, mitochondrial OS=Mus musculus OX=10090 GN=Atp5f1a PE=1 SV=1	0	0	0	0	4	0	0.837305
Q03265_K503	Atp5f1a	LEPSK*ITK	ATPA_MOUSE ATP synthase subunit alpha, mitochondrial OS=Mus musculus OX=10090 GN=Atp5f1a PE=1 SV=1	0	0	0	0	1	0	1.0989
Q03265_K531	Atp5f1a	SDGK*ISEQSDAK	ATPA_MOUSE ATP synthase subunit alpha, mitochondrial OS=Mus musculus OX=10090 GN=Atp5f1a PE=1 SV=1	0	0	3	0	1	4	1.04912
Q03265_K539	Atp5f1a	ISEQSDAK*LK	ATPA_MOUSE ATP synthase subunit alpha, mitochondrial OS=Mus musculus OX=10090 GN=Atp5f1a PE=1 SV=1	0	0	0	6	5	4	1.03819
Q03267_K219	Ikzf1	SSLEEHK*ER	IKZF1_MOUSE DNA-binding protein Ikaros OS=Mus musculus OX=10090 GN=Ikzf1 PE=1 SV=2	0	0	0	0	5	1	1.15556
Q03267_K271	Ikzf1	LASNVAK*R	IKZF1_MOUSE DNA-binding protein Ikaros OS=Mus musculus OX=10090 GN=Ikzf1 PE=1 SV=2	0	0	0	2	0	3	0.93628
Q03267_K424	Ikzf1	NGLALK*EEQR	IKZF1_MOUSE DNA-binding protein Ikaros OS=Mus musculus OX=10090 GN=Ikzf1 PE=1 SV=2	0	0	0	0	0	2	0.886145
Q03958_K122	Pfdn6	AQAAK*APGK	PFD6_MOUSE Prefoldin subunit 6 OS=Mus musculus OX=10090 GN=Pfdn6 PE=1 SV=1	0	0	0	0	0	1	0.83333
Q03963_K154	Eif2ak2	QLAAK*EAYQK	E2AK2_MOUSE Interferon-induced, double-stranded RNA-activated protein kinase OS=Mus musculus OX=10090 GN=Eif2ak2 PE=1 SV=2	0	0	0	0	3	4	1.00102
Q04207_K195	Rela	APNTAELK*ICR	TF65_MOUSE Transcription factor p65 OS=Mus musculus OX=10090 GN=Rela PE=1 SV=1	0	0	0	0	0	1	0.86207
Q04447_K11	Ckb	PFSNSHNTQK*LR	KCRB_MOUSE Creatine kinase B-type OS=Mus musculus OX=10090 GN=Ckb PE=1 SV=1	0	0	1	0	6	6	1.01338
Q04447_K313	Ckb	FSEVLK*R	KCRB_MOUSE Creatine kinase B-type OS=Mus musculus OX=10090 GN=Ckb PE=1 SV=1	0	0	0	0	0	1	0.90909
Q05144_K128	Rac2	DDKDTIEK*LK	RAC2_MOUSE Ras-related C3 botulinum toxin substrate 2 OS=Mus musculus OX=10090 GN=Rac2 PE=1 SV=1	0	0	0	0	2	4	1.03248
Q05144_K147	Rac2	LAPITYPQGLALAK*DIDSVK	RAC2_MOUSE Ras-related C3 botulinum toxin substrate 2 OS=Mus musculus OX=10090 GN=Rac2 PE=1 SV=1	0	0	0	1	0	0	0.86957
Q05144_K166	Rac2	GLK*TVFDEAIR	RAC2_MOUSE Ras-related C3 botulinum toxin substrate 2 OS=Mus musculus OX=10090 GN=Rac2 PE=1 SV=1	0	0	1	0	5	1	1.03103
Q05816_K10	Fabp5	DLEGK*WR	FABP5_MOUSE Fatty acid-binding protein 5 OS=Mus musculus OX=10090 GN=Fabp5 PE=1 SV=3	0	0	0	0	1	4	1.06626
Q05816_K103	Fabp5	TETVCTFQDGALVQHQQWDGK*ESTITR	FABP5_MOUSE Fatty acid-binding protein 5 OS=Mus musculus OX=10090 GN=Fabp5 PE=1 SV=3	0	0	0	0	1	0	0.93458
Q05860_K425	Fmn1	K*VIESEK	FMN1_MOUSE Formin-1 OS=Mus musculus OX=10090 GN=Fmn1 PE=1 SV=2	0	0	0	0	0	1	1.19048
Q05920_K988	Pc	PGASLPPLNLK*ELEK	PYC_MOUSE Pyruvate carboxylase, mitochondrial OS=Mus musculus OX=10090 GN=Pc PE=1 SV=1	0	0	0	1	0	0	1.0989
Q05D44_K917	Eif5b	NQYEK*HK	IF2P_MOUSE Eukaryotic translation initiation factor 5B OS=Mus musculus OX=10090 GN=Eif5b PE=1 SV=2	0	0	0	0	2	0	1.00566
Q07832_K589	Plk1	TMVDK*LLSSR	PLK1_MOUSE Serine/threonine-protein kinase PLK1 OS=Mus musculus OX=10090 GN=Plk1 PE=1 SV=2	0	0	0	0	1	0	0.99165
Q08943_K580	Ssrp1	K*AGEIWK	SSRP1_MOUSE FACT complex subunit SSRP1 OS=Mus musculus OX=10090 GN=Ssrp1 PE=1 SV=2	0	0	0	0	2	0	1.03746
Q08943_K650	Ssrp1	GSSSK*SSSR	SSRP1_MOUSE FACT complex subunit SSRP1 OS=Mus musculus OX=10090 GN=Ssrp1 PE=1 SV=2	0	0	0	1	0	0	1.36986
Q1HFZ0_K138	Nsun2	K*SPLLAK	NSUN2_MOUSE RNA cytosine C(5)-methyltransferase NSUN2 OS=Mus musculus OX=10090 GN=Nsun2 PE=1 SV=2	0	0	0	0	0	1	0.70423
Q1HFZ0_K445	Nsun2	VQNK*SAEAR	NSUN2_MOUSE RNA cytosine C(5)-methyltransferase NSUN2 OS=Mus musculus OX=10090 GN=Nsun2 PE=1 SV=2	0	0	0	0	0	3	1.09563
Q1HFZ0_K639	Nsun2	K*LSSEAYSQVK	NSUN2_MOUSE RNA cytosine C(5)-methyltransferase NSUN2 OS=Mus musculus OX=10090 GN=Nsun2 PE=1 SV=2	0	0	2	0	3	1	1.1209
Q1HFZ0_K653	Nsun2	DLAK*GSVVLK	NSUN2_MOUSE RNA cytosine C(5)-methyltransferase NSUN2 OS=Mus musculus OX=10090 GN=Nsun2 PE=1 SV=2	0	0	0	0	0	1	1.26582
Q3TBT3_K235	Sting1	AGIK*NR	STING_MOUSE Stimulator of interferon genes protein OS=Mus musculus OX=10090 GN=Sting1 PE=1 SV=2	0	0	0	0	1	0	1.03137
Q3TDX8_K449	Cyb5r4	CQLEK*LALR	NB5R4_MOUSE Cytochrome b5 reductase 4 OS=Mus musculus OX=10090 GN=Cyb5r4 PE=2 SV=3	0	0	0	0	1	0	1.49254
Q3THK7_K412	Gmps	VIEPLK*DFHKDEVR	GUAA_MOUSE GMP synthase [glutamine-hydrolyzing] OS=Mus musculus OX=10090 GN=Gmps PE=1 SV=2	0	0	0	0	2	5	0.996051
Q3THS6_K350	Mat2a	ELLEIVK*K	METK2_MOUSE S-adenosylmethionine synthase isoform type-2 OS=Mus musculus OX=10090 GN=Mat2a PE=1 SV=2	0	0	0	0	0	1	0.95238
Q3THW5_K8	H2az2	AGK*DSGK	H2AV_MOUSE Histone H2A.V OS=Mus musculus OX=10090 GN=H2az2 PE=1 SV=3	0	0	0	3	0	0	0.89479
Q3TKT4_K496	Smarca4	SVTGK*LQK	SMCA4_MOUSE Transcription activator BRG1 OS=Mus musculus OX=10090 GN=Smarca4 PE=1 SV=1	0	0	0	0	1	0	1.03093
Q3TL44_K301	Nlrx1	IPSK*YVGR	NLRX1_MOUSE NLR family member X1 OS=Mus musculus OX=10090 GN=Nlrx1 PE=1 SV=1	0	0	0	0	1	0	0.91743
Q3TLH4_K485	Prrc2c	AACAEK*LK	PRC2C_MOUSE Protein PRRC2C OS=Mus musculus OX=10090 GN=Prrc2c PE=1 SV=3	0	0	0	4	2	5	0.976886
Q3TLH4_K638	Prrc2c	PGYFK*QFQK	PRC2C_MOUSE Protein PRRC2C OS=Mus musculus OX=10090 GN=Prrc2c PE=1 SV=3	0	0	0	0	1	0	0.84034
Q3TRM8_K39	Hk3	PSGSLELECLQQFK*VTR	HXK3_MOUSE Hexokinase-3 OS=Mus musculus OX=10090 GN=Hk3 PE=1 SV=2	0	0	0	0	1	0	1.04167
Q3TTP0_K631	Shcbp1l	IK*GDLR	SHP1L_MOUSE Testicular spindle-associated protein SHCBP1L OS=Mus musculus OX=10090 GN=Shcbp1l PE=1 SV=1	0	0	0	0	1	0	0.86207
Q3TUU5_K173	Tex30	NLLEK*VAQK	TEX30_MOUSE Testis-expressed protein 30 OS=Mus musculus OX=10090 GN=Tex30 PE=1 SV=1	0	0	0	0	2	0	0.9488
Q3TWW8_K143	Srsf6	QAGEVTYADAHK*ER	SRSF6_MOUSE Serine/arginine-rich splicing factor 6 OS=Mus musculus OX=10090 GN=Srsf6 PE=1 SV=1	0	0	0	0	2	0	0.95025
Q3TWW8_K165	Srsf6	ALDK*LDGTEINGR	SRSF6_MOUSE Serine/arginine-rich splicing factor 6 OS=Mus musculus OX=10090 GN=Srsf6 PE=1 SV=1	0	0	0	0	0	2	0.87619
Q3TWW8_K182	Srsf6	LIEDK*PR	SRSF6_MOUSE Serine/arginine-rich splicing factor 6 OS=Mus musculus OX=10090 GN=Srsf6 PE=1 SV=1	0	0	0	0	0	2	0.89543
Q3TX08_K360	Trmt1	LGK*ASGDPGGR	TRM1_MOUSE tRNA (guanine(26)-N(2))-dimethyltransferase OS=Mus musculus OX=10090 GN=Trmt1 PE=1 SV=2	0	0	0	2	0	2	1.03921
Q3TXS7_K720	Psmd1	VINDK*HDDVMAK	PSMD1_MOUSE 26S proteasome non-ATPase regulatory subunit 1 OS=Mus musculus OX=10090 GN=Psmd1 PE=1 SV=1	0	0	0	0	1	0	1.0989
Q3U0V1_K489	Khsrp	GSPQQIDHAK*QLIEEK	FUBP2_MOUSE Far upstream element-binding protein 2 OS=Mus musculus OX=10090 GN=Khsrp PE=1 SV=2	0	0	0	0	4	4	1.17166
Q3U0V1_K72	Khsrp	K*DAFADAVQR	FUBP2_MOUSE Far upstream element-binding protein 2 OS=Mus musculus OX=10090 GN=Khsrp PE=1 SV=2	0	0	1	0	0	0	0.72464
Q3U1G5_K37	Isg20l2	FLEQK*GFLNK	I20L2_MOUSE Interferon-stimulated 20 kDa exonuclease-like 2 OS=Mus musculus OX=10090 GN=Isg20l2 PE=1 SV=2	0	0	0	0	2	0	1.185
Q3U319_K517	Rnf40	EVQAEIGK*LR	BRE1B_MOUSE E3 ubiquitin-protein ligase BRE1B OS=Mus musculus OX=10090 GN=Rnf40 PE=1 SV=2	0	0	0	0	0	1	0.93458
Q3U821_K675	Wdr75	SPEEK*LTPTSK	WDR75_MOUSE WD repeat-containing protein 75 OS=Mus musculus OX=10090 GN=Wdr75 PE=1 SV=1	0	0	0	0	3	0	1.29815
Q3U9G9_K111	Lbr	SVSASHEGDVK*EK	LBR_MOUSE Delta(14)-sterol reductase LBR OS=Mus musculus OX=10090 GN=Lbr PE=1 SV=2	0	0	0	0	1	0	1.04167
Q3U9G9_K64	Lbr	K*SGSISSSPSR	LBR_MOUSE Delta(14)-sterol reductase LBR OS=Mus musculus OX=10090 GN=Lbr PE=1 SV=2	0	0	0	0	0	1	1.13636
Q3UBX0_K215	Tmem109	SSGSHLEAK*VR	TM109_MOUSE Transmembrane protein 109 OS=Mus musculus OX=10090 GN=Tmem109 PE=1 SV=2	0	0	0	0	6	5	1.02713
Q3UCV8_K34	Otulin	DGGK*VTAGAQPR	OTUL_MOUSE Ubiquitin thioesterase otulin OS=Mus musculus OX=10090 GN=Otulin PE=1 SV=1	0	0	0	0	0	1	1.19048
Q3UCV8_K66	Otulin	EK*ELLIHER	OTUL_MOUSE Ubiquitin thioesterase otulin OS=Mus musculus OX=10090 GN=Otulin PE=1 SV=1	0	0	0	0	1	0	0.70922
Q3UEB3_K206	Puf60	NIK*VGR	PUF60_MOUSE Poly(U)-binding-splicing factor PUF60 OS=Mus musculus OX=10090 GN=Puf60 PE=1 SV=2	0	0	0	0	0	1	1.38889
Q3UGR5_K50	Hdhd2	FVTNTTK*ESK	HDHD2_MOUSE Haloacid dehalogenase-like hydrolase domain-containing protein 2 OS=Mus musculus OX=10090 GN=Hdhd2 PE=1 SV=2	0	0	0	0	0	1	1.06383
Q3UHX2_K132	Pdap1	MHLAGK*TEQAK	HAP28_MOUSE 28 kDa heat- and acid-stable phosphoprotein OS=Mus musculus OX=10090 GN=Pdap1 PE=1 SV=1	0	0	0	1	0	1	1.22469
Q3UHX2_K137	Pdap1	TEQAK*ADLAR	HAP28_MOUSE 28 kDa heat- and acid-stable phosphoprotein OS=Mus musculus OX=10090 GN=Pdap1 PE=1 SV=1	0	0	0	0	5	0	0.928442
Q3UIR3_K416	Dtx3l	VQEK*GQK	DTX3L_MOUSE E3 ubiquitin-protein ligase DTX3L OS=Mus musculus OX=10090 GN=Dtx3l PE=1 SV=1	0	0	0	1	0	0	1.05263
Q3UJD6_K777	Usp19	AEVLK*NR	UBP19_MOUSE Ubiquitin carboxyl-terminal hydrolase 19 OS=Mus musculus OX=10090 GN=Usp19 PE=1 SV=1	0	0	0	0	0	1	1.23457
Q3UM45_K336	Ppp1r7	NPLQK*DPQYR	PP1R7_MOUSE Protein phosphatase 1 regulatory subunit 7 OS=Mus musculus OX=10090 GN=Ppp1r7 PE=1 SV=2	0	0	0	0	1	0	1
Q3UMY5_K63	Eml4	LAISEDHVASVK*K	EMAL4_MOUSE Echinoderm microtubule-associated protein-like 4 OS=Mus musculus OX=10090 GN=Eml4 PE=1 SV=1	0	0	0	0	1	1	1.12325
Q3UND0_K125	Skap2	AGYLEK*R	SKAP2_MOUSE Src kinase-associated phosphoprotein 2 OS=Mus musculus OX=10090 GN=Skap2 PE=1 SV=2	0	0	0	1	1	3	0.998504
Q3UPL0_K791	Sec31a	AQGK*PVSGQESSQSPYER	SC31A_MOUSE Protein transport protein Sec31A OS=Mus musculus OX=10090 GN=Sec31a PE=1 SV=2	0	0	1	1	0	1	1.07789
Q3UW53_K474	Niban1	IPVAIEK*VK	NIBA1_MOUSE Protein Niban 1 OS=Mus musculus OX=10090 GN=Niban1 PE=1 SV=2	0	0	0	1	1	2	1.20744
Q3UWM4_K389	Kdm7a	LK*TPDLFK	KDM7A_MOUSE Lysine-specific demethylase 7A OS=Mus musculus OX=10090 GN=Kdm7a PE=2 SV=2	0	0	1	0	0	0	1.04167
Q3V188_K242	Endou	TAVMK*ELYSFLHHQNR	ENDOU_MOUSE Poly(U)-specific endoribonuclease OS=Mus musculus OX=10090 GN=Endou PE=2 SV=1	0	0	0	0	1	0	0.95238
Q3V1V3_K787	Esf1	ILEEK*AR	ESF1_MOUSE ESF1 homolog OS=Mus musculus OX=10090 GN=Esf1 PE=1 SV=1	0	0	0	0	4	1	1.03302
Q4QRL3_K347	Ccdc88b	EK*LQAAEVFK	CC88B_MOUSE Coiled-coil domain-containing protein 88B OS=Mus musculus OX=10090 GN=Ccdc88b PE=1 SV=2	0	0	2	0	0	1	0.872073
Q4VA36_K31	Cenatac	QLK*GALER	CATAC_MOUSE Centrosomal AT-AC splicing factor OS=Mus musculus OX=10090 GN=Cenatac PE=2 SV=1	0	0	1	0	0	0	1.20482
Q4VA53_K507	Pds5b	K*DLLDIIK	PDS5B_MOUSE Sister chromatid cohesion protein PDS5 homolog B OS=Mus musculus OX=10090 GN=Pds5b PE=1 SV=1	0	0	0	0	0	1	0.98039
Q501J6_K389	Ddx17	SGK*APILIATDVASR	DDX17_MOUSE Probable ATP-dependent RNA helicase DDX17 OS=Mus musculus OX=10090 GN=Ddx17 PE=1 SV=1	0	0	0	0	0	2	1.0205
Q501J6_K513	Ddx17	GVK*DGGR	DDX17_MOUSE Probable ATP-dependent RNA helicase DDX17 OS=Mus musculus OX=10090 GN=Ddx17 PE=1 SV=1	0	0	0	2	2	5	0.870497
Q52KR3_K2503	Prune2	VIPTK*GPK	PRUN2_MOUSE Protein prune homolog 2 OS=Mus musculus OX=10090 GN=Prune2 PE=1 SV=2	0	0	0	3	0	6	1.34217
Q569L8_K1113	Cenpj	IK*SAPPR	CENPJ_MOUSE Centromere protein J OS=Mus musculus OX=10090 GN=Cenpj PE=2 SV=2	0	0	0	0	1	0	1.0101
Q569Z6_K252	Thrap3	SPALK*SPLQSVVVR	TR150_MOUSE Thyroid hormone receptor-associated protein 3 OS=Mus musculus OX=10090 GN=Thrap3 PE=1 SV=1	0	0	0	0	2	0	1.06576
Q569Z6_K548	Thrap3	LGSK*GDFSSGK	TR150_MOUSE Thyroid hormone receptor-associated protein 3 OS=Mus musculus OX=10090 GN=Thrap3 PE=1 SV=1	0	0	1	0	3	0	1.15512
Q569Z6_K694	Thrap3	HGLTHEELK*SPR	TR150_MOUSE Thyroid hormone receptor-associated protein 3 OS=Mus musculus OX=10090 GN=Thrap3 PE=1 SV=1	0	0	0	0	1	1	0.826025
Q58A65_K134	Spag9	QLELK*AK	JIP4_MOUSE C-Jun-amino-terminal kinase-interacting protein 4 OS=Mus musculus OX=10090 GN=Spag9 PE=1 SV=2	0	0	0	0	1	0	0.79365
Q5DTM8_K806	Rnf20	KLEEK*EHLLQSNIGTGEK	BRE1A_MOUSE E3 ubiquitin-protein ligase BRE1A OS=Mus musculus OX=10090 GN=Rnf20 PE=1 SV=2	0	0	0	0	3	0	1.24008
Q5SSL4_K388	Abr	ISALK*SEIQK	ABR_MOUSE Active breakpoint cluster region-related protein OS=Mus musculus OX=10090 GN=Abr PE=1 SV=1	0	0	0	0	1	1	1.23035
Q5SUF2_K166	Luc7l3	LVEQLK*EER	LC7L3_MOUSE Luc7-like protein 3 OS=Mus musculus OX=10090 GN=Luc7l3 PE=1 SV=1	0	0	0	0	0	2	1.31387
Q5SW19_K1188	Cluh	TQLGEDHEK*TK	CLU_MOUSE Clustered mitochondria protein homolog OS=Mus musculus OX=10090 GN=Cluh PE=1 SV=2	0	0	0	0	2	3	1.01878
Q5SWD9_K38	Tsr1	VGPK*ILCK	TSR1_MOUSE Pre-rRNA-processing protein TSR1 homolog OS=Mus musculus OX=10090 GN=Tsr1 PE=1 SV=1	0	0	0	2	0	4	1.00089
Q5SXY1_K231	Specc1	TLEEK*NK	CYTSB_MOUSE Cytospin-B OS=Mus musculus OX=10090 GN=Specc1 PE=1 SV=2	0	0	0	0	2	0	0.877745
Q60605_K50	Myl6	ALGQNPTNAEVLK*VLGNPK	MYL6_MOUSE Myosin light polypeptide 6 OS=Mus musculus OX=10090 GN=Myl6 PE=1 SV=3	0	0	0	6	1	5	1.11841
Q60605_K79	Myl6	VLDFEHFLPMLQTVAK*NK	MYL6_MOUSE Myosin light polypeptide 6 OS=Mus musculus OX=10090 GN=Myl6 PE=1 SV=3	0	0	0	1	0	0	0.84746
Q60631_K69	Grb2	AK*AEEMLSK	GRB2_MOUSE Growth factor receptor-bound protein 2 OS=Mus musculus OX=10090 GN=Grb2 PE=1 SV=1	0	0	0	0	0	2	1.10461
Q60668_K197	Hnrnpd	IFVGGLSPDTPEEK*IR	HNRPD_MOUSE Heterogeneous nuclear ribonucleoprotein D0 OS=Mus musculus OX=10090 GN=Hnrnpd PE=1 SV=2	0	0	1	2	1	4	1.08953
Q60710_K576	Samhd1	INK*EQVSQLLPEK	SAMH1_MOUSE Deoxynucleoside triphosphate triphosphohydrolase SAMHD1 OS=Mus musculus OX=10090 GN=Samhd1 PE=1 SV=3	0	0	0	0	0	1	1.49254
Q60737_K102	Csnk2a1	GGPNIITLADIVK*DPVSR	CSK21_MOUSE Casein kinase II subunit alpha OS=Mus musculus OX=10090 GN=Csnk2a1 PE=1 SV=2	0	0	1	1	0	0	0.99123
Q60749_K194	Khdrbs1	LQEETGAK*ISVLGK	KHDR1_MOUSE KH domain-containing, RNA-binding, signal transduction-associated protein 1 OS=Mus musculus OX=10090 GN=Khdrbs1 PE=1 SV=2	0	0	0	0	0	3	1.30021
Q60749_K21	Khdrbs1	SCSK*DPSGAHPSVR	KHDR1_MOUSE KH domain-containing, RNA-binding, signal transduction-associated protein 1 OS=Mus musculus OX=10090 GN=Khdrbs1 PE=1 SV=2	0	0	6	6	6	5	1.05668
Q60749_K214	Khdrbs1	K*GGDPK	KHDR1_MOUSE KH domain-containing, RNA-binding, signal transduction-associated protein 1 OS=Mus musculus OX=10090 GN=Khdrbs1 PE=1 SV=2	0	0	0	2	0	0	1.01427
Q60749_K424	Khdrbs1	PSLK*APPAR	KHDR1_MOUSE KH domain-containing, RNA-binding, signal transduction-associated protein 1 OS=Mus musculus OX=10090 GN=Khdrbs1 PE=1 SV=2	0	0	0	0	3	5	0.938281
Q60749_K432	Khdrbs1	PVK*GAYR	KHDR1_MOUSE KH domain-containing, RNA-binding, signal transduction-associated protein 1 OS=Mus musculus OX=10090 GN=Khdrbs1 PE=1 SV=2	0	0	0	1	2	5	1.03278
Q60787_K38	Lcp2	K*YHIDGAR	LCP2_MOUSE Lymphocyte cytosolic protein 2 OS=Mus musculus OX=10090 GN=Lcp2 PE=1 SV=2	0	0	0	0	1	0	0.9009
Q60787_K438	Lcp2	K*INQDGTFLVR	LCP2_MOUSE Lymphocyte cytosolic protein 2 OS=Mus musculus OX=10090 GN=Lcp2 PE=1 SV=2	0	0	0	0	0	5	1.04777
Q60817_K142	Naca	IEDLSQQAQLAAAEK*FK	NACA_MOUSE Nascent polypeptide-associated complex subunit alpha OS=Mus musculus OX=10090 GN=Naca PE=1 SV=1	0	0	0	2	2	0	1.23705
Q60823_K390	Akt2	KDPK*QR	AKT2_MOUSE RAC-beta serine/threonine-protein kinase OS=Mus musculus OX=10090 GN=Akt2 PE=1 SV=1	0	0	0	1	0	0	0.75758
Q60864_K100	Stip1	TYEEGLK*HEANNLQLK	STIP1_MOUSE Stress-induced-phosphoprotein 1 OS=Mus musculus OX=10090 GN=Stip1 PE=1 SV=1	0	0	0	0	2	0	1.42845
Q60864_K243	Stip1	DFDK*ALK	STIP1_MOUSE Stress-induced-phosphoprotein 1 OS=Mus musculus OX=10090 GN=Stip1 PE=1 SV=1	0	0	0	0	1	1	0.881075
Q60864_K325	Stip1	DAIHFYNK*SLAEHR	STIP1_MOUSE Stress-induced-phosphoprotein 1 OS=Mus musculus OX=10090 GN=Stip1 PE=1 SV=1	0	0	0	0	6	5	1.01276
Q60864_K434	Stip1	K*AAALEAMK	STIP1_MOUSE Stress-induced-phosphoprotein 1 OS=Mus musculus OX=10090 GN=Stip1 PE=1 SV=1	0	0	0	0	0	2	1.0125
Q60864_K442	Stip1	AAALEAMK*DYTK	STIP1_MOUSE Stress-induced-phosphoprotein 1 OS=Mus musculus OX=10090 GN=Stip1 PE=1 SV=1	0	0	0	0	1	0	0.89286
Q60864_K486	Stip1	HDSPEDVK*R	STIP1_MOUSE Stress-induced-phosphoprotein 1 OS=Mus musculus OX=10090 GN=Stip1 PE=1 SV=1	0	0	0	1	4	5	1.00957
Q60864_K50	Stip1	SAAYAK*K	STIP1_MOUSE Stress-induced-phosphoprotein 1 OS=Mus musculus OX=10090 GN=Stip1 PE=1 SV=1	0	0	0	1	0	0	0.81967
Q60864_K523	Stip1	DPQALSEHLK*NPVIAQK	STIP1_MOUSE Stress-induced-phosphoprotein 1 OS=Mus musculus OX=10090 GN=Stip1 PE=1 SV=1	0	0	0	0	0	3	0.9728
Q60864_K530	Stip1	NPVIAQK*IQK	STIP1_MOUSE Stress-induced-phosphoprotein 1 OS=Mus musculus OX=10090 GN=Stip1 PE=1 SV=1	0	0	0	6	6	4	1.0238
Q60864_K68	Stip1	TVDLK*PDWGK	STIP1_MOUSE Stress-induced-phosphoprotein 1 OS=Mus musculus OX=10090 GN=Stip1 PE=1 SV=1	0	0	0	0	4	0	0.839335
Q60864_K78	Stip1	K*AAALEFLNR	STIP1_MOUSE Stress-induced-phosphoprotein 1 OS=Mus musculus OX=10090 GN=Stip1 PE=1 SV=1	0	5	6	6	3	6	1.03514
Q60865_K232	Caprin1	ALK*EIVER	CAPR1_MOUSE Caprin-1 OS=Mus musculus OX=10090 GN=Caprin1 PE=1 SV=2	0	0	1	2	1	6	1.13597
Q60875_K657	Arhgef2	LLK*DALR	ARHG2_MOUSE Rho guanine nucleotide exchange factor 2 OS=Mus musculus OX=10090 GN=Arhgef2 PE=1 SV=4	0	0	0	0	0	1	0.88496
Q60875_K798	Arhgef2	AAVASVTPEK*QATELALLQR	ARHG2_MOUSE Rho guanine nucleotide exchange factor 2 OS=Mus musculus OX=10090 GN=Arhgef2 PE=1 SV=4	0	0	0	0	0	2	0.928095
Q60930_K44	Vdac2	LDVK*TK	VDAC2_MOUSE Voltage-dependent anion-selective channel protein 2 OS=Mus musculus OX=10090 GN=Vdac2 PE=1 SV=2	0	0	0	1	0	4	0.99524
Q60932_K237	Vdac1	FGIAAK*YQVDPDACFSAK	VDAC1_MOUSE Voltage-dependent anion-selective channel protein 1 OS=Mus musculus OX=10090 GN=Vdac1 PE=1 SV=3	0	0	0	1	0	2	1.02508
Q60973_K101	Rbbp7	VHIPNDDAQFDASHCDSDK*GEFGGFGSVTGK	RBBP7_MOUSE Histone-binding protein RBBP7 OS=Mus musculus OX=10090 GN=Rbbp7 PE=1 SV=1	0	0	0	0	5	1	1.06581
Q60973_K119	Rbbp7	IECEIK*INHEGEVNR	RBBP7_MOUSE Histone-binding protein RBBP7 OS=Mus musculus OX=10090 GN=Rbbp7 PE=1 SV=1	0	0	0	0	5	3	0.96151
Q61029_K212	Tmpo	TPVTLK*QR	LAP2B_MOUSE Lamina-associated polypeptide 2, isoforms beta/delta/epsilon/gamma OS=Mus musculus OX=10090 GN=Tmpo PE=1 SV=4	0	0	0	0	0	1	1.42857
Q61029_K392	Tmpo	YVPK*YAPLADVK	LAP2B_MOUSE Lamina-associated polypeptide 2, isoforms beta/delta/epsilon/gamma OS=Mus musculus OX=10090 GN=Tmpo PE=1 SV=4	0	0	0	0	0	2	1.06683
Q61029_K400	Tmpo	YAPLADVK*SEK	LAP2B_MOUSE Lamina-associated polypeptide 2, isoforms beta/delta/epsilon/gamma OS=Mus musculus OX=10090 GN=Tmpo PE=1 SV=4	0	0	0	0	2	1	1.23459
Q61033_K433	Tmpo	LSEK*PAR	LAP2A_MOUSE Lamina-associated polypeptide 2, isoforms alpha/zeta OS=Mus musculus OX=10090 GN=Tmpo PE=1 SV=4	0	0	0	3	0	3	1.07448
Q61033_K562	Tmpo	AATQASSTESCDK*HLDLALCR	LAP2A_MOUSE Lamina-associated polypeptide 2, isoforms alpha/zeta OS=Mus musculus OX=10090 GN=Tmpo PE=1 SV=4	0	0	0	0	4	0	0.903112
Q61035_K42	Hars1	LK*AQLGQDEGK	HARS1_MOUSE Histidine--tRNA ligase, cytoplasmic OS=Mus musculus OX=10090 GN=Hars1 PE=1 SV=2	0	0	2	0	1	4	1.12904
Q61035_K75	Hars1	EK*VFDVIIR	HARS1_MOUSE Histidine--tRNA ligase, cytoplasmic OS=Mus musculus OX=10090 GN=Hars1 PE=1 SV=2	0	0	2	0	0	0	1.08595
Q61039_K183	Hand2	K*ELNEILK	HAND2_MOUSE Heart- and neural crest derivatives-expressed protein 2 OS=Mus musculus OX=10090 GN=Hand2 PE=1 SV=3	0	0	0	0	0	3	0.912803
Q61081_K102	Cdc37	SWEQK*LEDMR SWEQK*LEDMRK	CDC37_MOUSE Hsp90 co-chaperone Cdc37 OS=Mus musculus OX=10090 GN=Cdc37 PE=1 SV=1	0	0	0	0	2	2	1.08096
Q61081_K155	Cdc37	TFVEK*YEK	CDC37_MOUSE Hsp90 co-chaperone Cdc37 OS=Mus musculus OX=10090 GN=Cdc37 PE=1 SV=1	0	0	0	0	1	0	1.25
Q61081_K241	Cdc37	QFFTK*IK	CDC37_MOUSE Hsp90 co-chaperone Cdc37 OS=Mus musculus OX=10090 GN=Cdc37 PE=1 SV=1	0	0	0	1	2	5	1.18584
Q61081_K331	Cdc37	MDPTDAK*YHMQR	CDC37_MOUSE Hsp90 co-chaperone Cdc37 OS=Mus musculus OX=10090 GN=Cdc37 PE=1 SV=1	0	0	0	0	2	0	1.03093
Q61081_K60	Cdc37	K*VAECQR	CDC37_MOUSE Hsp90 co-chaperone Cdc37 OS=Mus musculus OX=10090 GN=Cdc37 PE=1 SV=1	0	0	1	5	0	4	0.925276
Q61093_K506	Cybb	DVITGLK*QK	CY24B_MOUSE Cytochrome b-245 heavy chain OS=Mus musculus OX=10090 GN=Cybb PE=1 SV=1	0	0	0	1	1	2	0.996913
Q61161_K228	Map4k2	ALMLMSK*SSFQPPK	M4K2_MOUSE Mitogen-activated protein kinase kinase kinase kinase 2 OS=Mus musculus OX=10090 GN=Map4k2 PE=1 SV=1	0	0	1	0	0	0	1.31579
Q61191_K288	Hcfc1	VATHEK*EWK	HCFC1_MOUSE Host cell factor 1 OS=Mus musculus OX=10090 GN=Hcfc1 PE=1 SV=2	0	0	0	0	0	1	0.98039
Q61233_K294	Lcp1	ITNFSTDIK*DSK	PLSL_MOUSE Plastin-2 OS=Mus musculus OX=10090 GN=Lcp1 PE=1 SV=4	0	0	0	1	2	5	1.02577
Q61233_K297	Lcp1	DSK*AYYHLLEQVAPK	PLSL_MOUSE Plastin-2 OS=Mus musculus OX=10090 GN=Lcp1 PE=1 SV=4	0	0	0	0	4	4	0.976195
Q61233_K328	Lcp1	EK*DDIQR	PLSL_MOUSE Plastin-2 OS=Mus musculus OX=10090 GN=Lcp1 PE=1 SV=4	0	0	0	1	1	3	1.00839
Q61233_K444	Lcp1	VNK*PPYPK	PLSL_MOUSE Plastin-2 OS=Mus musculus OX=10090 GN=Lcp1 PE=1 SV=4	0	0	5	6	6	6	0.997265
Q61233_K455	Lcp1	LGGNMK*K	PLSL_MOUSE Plastin-2 OS=Mus musculus OX=10090 GN=Lcp1 PE=1 SV=4	0	0	0	4	0	1	0.945958
Q61233_K542	Lcp1	SSSIASFK*DPK	PLSL_MOUSE Plastin-2 OS=Mus musculus OX=10090 GN=Lcp1 PE=1 SV=4	0	0	0	0	4	4	0.919608
Q61233_K82	Lcp1	VFHGLK*STEVAK	PLSL_MOUSE Plastin-2 OS=Mus musculus OX=10090 GN=Lcp1 PE=1 SV=4	2	0	5	6	6	6	1.03146
Q61233_K88	Lcp1	STEVAK*TFR	PLSL_MOUSE Plastin-2 OS=Mus musculus OX=10090 GN=Lcp1 PE=1 SV=4	0	0	1	4	0	5	0.996406
Q61316_K477	Hspa4	VTPQSDGSSSK*VK	HSP74_MOUSE Heat shock 70 kDa protein 4 OS=Mus musculus OX=10090 GN=Hspa4 PE=1 SV=1	0	0	0	2	3	2	1.10075
Q61316_K61	Hspa4	SQVISNAK*NTVQGFK	HSP74_MOUSE Heat shock 70 kDa protein 4 OS=Mus musculus OX=10090 GN=Hspa4 PE=1 SV=1	0	0	0	1	0	0	0.88496
Q61316_K675	Hspa4	QVYVDK*LAELK	HSP74_MOUSE Heat shock 70 kDa protein 4 OS=Mus musculus OX=10090 GN=Hspa4 PE=1 SV=1	0	0	0	0	5	1	1.10769
Q61316_K680	Hspa4	LAELK*SLGQPIK	HSP74_MOUSE Heat shock 70 kDa protein 4 OS=Mus musculus OX=10090 GN=Hspa4 PE=1 SV=1	0	0	0	0	6	1	1.00896
Q61316_K687	Hspa4	SLGQPIK*TR	HSP74_MOUSE Heat shock 70 kDa protein 4 OS=Mus musculus OX=10090 GN=Hspa4 PE=1 SV=1	0	0	0	0	1	6	1.02316
Q61316_K718	Hspa4	VISSFK*NK	HSP74_MOUSE Heat shock 70 kDa protein 4 OS=Mus musculus OX=10090 GN=Hspa4 PE=1 SV=1	0	0	0	3	0	5	0.733897
Q61316_K767	Hspa4	TK*EIEAK	HSP74_MOUSE Heat shock 70 kDa protein 4 OS=Mus musculus OX=10090 GN=Hspa4 PE=1 SV=1	0	0	0	0	0	2	1.08187
Q61316_K772	Hspa4	EIEAK*IK	HSP74_MOUSE Heat shock 70 kDa protein 4 OS=Mus musculus OX=10090 GN=Hspa4 PE=1 SV=1	0	0	0	4	5	5	1.01085
Q61335_K181	Bcap31	LEENK*SLK	BAP31_MOUSE B-cell receptor-associated protein 31 OS=Mus musculus OX=10090 GN=Bcap31 PE=1 SV=4	0	0	0	0	0	1	1.06383
Q61335_K184	Bcap31	SLK*NDLR	BAP31_MOUSE B-cell receptor-associated protein 31 OS=Mus musculus OX=10090 GN=Bcap31 PE=1 SV=4	0	0	0	0	0	2	0.95247
Q61335_K189	Bcap31	K*LKDELASTK	BAP31_MOUSE B-cell receptor-associated protein 31 OS=Mus musculus OX=10090 GN=Bcap31 PE=1 SV=4	0	0	1	0	0	0	0.98039
Q61335_K191	Bcap31	LK*DELASTK	BAP31_MOUSE B-cell receptor-associated protein 31 OS=Mus musculus OX=10090 GN=Bcap31 PE=1 SV=4	0	0	4	1	1	5	1.03569
Q61335_K203	Bcap31	KLEK*AENEALAMQK	BAP31_MOUSE B-cell receptor-associated protein 31 OS=Mus musculus OX=10090 GN=Bcap31 PE=1 SV=4	0	0	0	0	1	0	0.7874
Q61510_K225	Trim25	SK*QQCVQDSMK	TRI25_MOUSE E3 ubiquitin/ISG15 ligase TRIM25 OS=Mus musculus OX=10090 GN=Trim25 PE=1 SV=2	0	0	1	2	0	3	0.963625
Q61584_K295	Fxr1	NLVGK*VIGK	FXR1_MOUSE Fragile X mental retardation syndrome-related protein 1 OS=Mus musculus OX=10090 GN=Fxr1 PE=1 SV=2	0	0	0	0	1	0	1.1236
Q61595_K1092	Ktn1	ACVAGTSDAEAVK*VLEHR	KTN1_MOUSE Kinectin OS=Mus musculus OX=10090 GN=Ktn1 PE=1 SV=1	0	0	0	0	2	2	0.953995
Q61595_K319	Ktn1	SGVIK*EALK	KTN1_MOUSE Kinectin OS=Mus musculus OX=10090 GN=Ktn1 PE=1 SV=1	0	0	0	0	0	2	1.11481
Q61595_K809	Ktn1	VIHEK*DGQIK	KTN1_MOUSE Kinectin OS=Mus musculus OX=10090 GN=Ktn1 PE=1 SV=1	0	0	0	0	4	3	1.08692
Q61598_K112	Gdi2	VIEGSFVYK*GGK	GDIB_MOUSE Rab GDP dissociation inhibitor beta OS=Mus musculus OX=10090 GN=Gdi2 PE=1 SV=1	0	0	0	0	3	1	1.06855
Q61598_K164	Gdi2	TFEGVDPK*K	GDIB_MOUSE Rab GDP dissociation inhibitor beta OS=Mus musculus OX=10090 GN=Gdi2 PE=1 SV=1	0	0	0	6	6	6	1.0067
Q61598_K269	Gdi2	VVGVK*SEGEIAR	GDIB_MOUSE Rab GDP dissociation inhibitor beta OS=Mus musculus OX=10090 GN=Gdi2 PE=1 SV=1	0	0	0	0	0	4	0.870753
Q61599_K49	Arhgdib	K*TLLGDVPVVADPTVPNVTVTR	GDIR2_MOUSE Rho GDP-dissociation inhibitor 2 OS=Mus musculus OX=10090 GN=Arhgdib PE=1 SV=3	0	0	0	0	0	1	1.25
Q61599_K95	Arhgdib	K*DTFVLK	GDIR2_MOUSE Rho GDP-dissociation inhibitor 2 OS=Mus musculus OX=10090 GN=Arhgdib PE=1 SV=3	0	0	0	0	0	1	1.04167
Q61656_K236	Ddx5	LIDFLECGK*TNLR	DDX5_MOUSE Probable ATP-dependent RNA helicase DDX5 OS=Mus musculus OX=10090 GN=Ddx5 PE=1 SV=2	0	2	3	3	3	2	0.991379
Q61656_K32	Ddx5	TGPLSGK*K	DDX5_MOUSE Probable ATP-dependent RNA helicase DDX5 OS=Mus musculus OX=10090 GN=Ddx5 PE=1 SV=2	0	0	0	4	4	6	1.11825
Q61656_K33	Ddx5	K*FGNPGEK	DDX5_MOUSE Probable ATP-dependent RNA helicase DDX5 OS=Mus musculus OX=10090 GN=Ddx5 PE=1 SV=2	0	0	0	0	0	3	1.00755
Q61656_K388	Ddx5	DWVLNEFK*HGK	DDX5_MOUSE Probable ATP-dependent RNA helicase DDX5 OS=Mus musculus OX=10090 GN=Ddx5 PE=1 SV=2	0	0	0	0	2	0	1.32735
Q61656_K391	Ddx5	HGK*APILIATDVASR	DDX5_MOUSE Probable ATP-dependent RNA helicase DDX5 OS=Mus musculus OX=10090 GN=Ddx5 PE=1 SV=2	0	0	1	6	0	4	1.1006
Q61656_K40	Ddx5	FGNPGEK*LVK	DDX5_MOUSE Probable ATP-dependent RNA helicase DDX5 OS=Mus musculus OX=10090 GN=Ddx5 PE=1 SV=2	0	0	0	0	2	1	1.03505
Q61656_K470	Ddx5	EANQAINPK*LLQLVEDR	DDX5_MOUSE Probable ATP-dependent RNA helicase DDX5 OS=Mus musculus OX=10090 GN=Ddx5 PE=1 SV=2	0	0	1	2	0	0	0.996767
Q61656_K501	Ddx5	YSAGK*R	DDX5_MOUSE Probable ATP-dependent RNA helicase DDX5 OS=Mus musculus OX=10090 GN=Ddx5 PE=1 SV=2	0	0	0	0	0	1	0.90909
Q61656_K523	Ddx5	GYSNLLK*R	DDX5_MOUSE Probable ATP-dependent RNA helicase DDX5 OS=Mus musculus OX=10090 GN=Ddx5 PE=1 SV=2	0	0	0	2	1	3	1.0763
Q61656_K80	Ddx5	SK*EITVR	DDX5_MOUSE Probable ATP-dependent RNA helicase DDX5 OS=Mus musculus OX=10090 GN=Ddx5 PE=1 SV=2	0	0	0	0	0	1	0.81967
Q61686_K102	Cbx5	SSFSNSADDIK*SK	CBX5_MOUSE Chromobox protein homolog 5 OS=Mus musculus OX=10090 GN=Cbx5 PE=1 SV=1	0	0	0	0	2	2	0.992533
Q61699_K257	Hsph1	LDAK*SK	HS105_MOUSE Heat shock protein 105 kDa OS=Mus musculus OX=10090 GN=Hsph1 PE=1 SV=2	0	0	0	3	0	5	1.05717
Q61699_K272	Hsph1	LHQECEK*LK	HS105_MOUSE Heat shock protein 105 kDa OS=Mus musculus OX=10090 GN=Hsph1 PE=1 SV=2	0	0	0	0	3	1	0.9141
Q61699_K351	Hsph1	IPAVK*ER	HS105_MOUSE Heat shock protein 105 kDa OS=Mus musculus OX=10090 GN=Hsph1 PE=1 SV=2	0	0	0	0	4	2	1.07353
Q61699_K649	Hsph1	DK*LCGPYEK	HS105_MOUSE Heat shock protein 105 kDa OS=Mus musculus OX=10090 GN=Hsph1 PE=1 SV=2	0	0	1	2	3	4	0.909548
Q61699_K665	Hsph1	FICEQEHEK*FLR	HS105_MOUSE Heat shock protein 105 kDa OS=Mus musculus OX=10090 GN=Hsph1 PE=1 SV=2	0	0	0	0	0	2	1.35965
Q61699_K704	Hsph1	MGTPVK*VR	HS105_MOUSE Heat shock protein 105 kDa OS=Mus musculus OX=10090 GN=Hsph1 PE=1 SV=2	0	0	0	6	3	6	1.11749
Q61699_K82	Hsph1	AFNDPFIQK*EK	HS105_MOUSE Heat shock protein 105 kDa OS=Mus musculus OX=10090 GN=Hsph1 PE=1 SV=2	0	0	0	0	0	2	1.03022
Q61753_K21	Phgdh	K*ILQDGGLQVVEK	SERA_MOUSE D-3-phosphoglycerate dehydrogenase OS=Mus musculus OX=10090 GN=Phgdh PE=1 SV=3	0	0	2	0	4	3	1.0551
Q61753_K394	Phgdh	QADVNLVNAK*LLVK	SERA_MOUSE D-3-phosphoglycerate dehydrogenase OS=Mus musculus OX=10090 GN=Phgdh PE=1 SV=3	0	0	0	0	0	1	1
Q61768_K791	Kif5b	GLEETVAK*ELQTLHNLR	KINH_MOUSE Kinesin-1 heavy chain OS=Mus musculus OX=10090 GN=Kif5b PE=1 SV=3	0	0	0	0	0	1	1.44928
Q61768_K875	Kif5b	VK*ALESALK	KINH_MOUSE Kinesin-1 heavy chain OS=Mus musculus OX=10090 GN=Kif5b PE=1 SV=3	0	0	0	0	0	1	1.05263
Q61792_K75	Lasp1	LK*QQSELQSQVR	LASP1_MOUSE LIM and SH3 domain protein 1 OS=Mus musculus OX=10090 GN=Lasp1 PE=1 SV=1	0	0	0	0	0	1	0.81301
Q61937_K141	Npm1	LLGMSGK*R	NPM_MOUSE Nucleophosmin OS=Mus musculus OX=10090 GN=Npm1 PE=1 SV=1	0	0	0	6	4	6	1.03358
Q61937_K150	Npm1	SAPGGGNK*VPQK	NPM_MOUSE Nucleophosmin OS=Mus musculus OX=10090 GN=Npm1 PE=1 SV=1	0	2	0	5	4	6	1.04142
Q61937_K201	Npm1	DTPAK*NAQK	NPM_MOUSE Nucleophosmin OS=Mus musculus OX=10090 GN=Npm1 PE=1 SV=1	0	2	0	5	4	6	1.01004
Q61937_K205	Npm1	NAQK*SNQNGK	NPM_MOUSE Nucleophosmin OS=Mus musculus OX=10090 GN=Npm1 PE=1 SV=1	0	0	4	3	3	4	1.05262
Q61937_K211	Npm1	SNQNGK*DLKPSTPR	NPM_MOUSE Nucleophosmin OS=Mus musculus OX=10090 GN=Npm1 PE=1 SV=1	0	0	6	4	6	6	1.09093
Q61937_K214	Npm1	DLK*PSTPR	NPM_MOUSE Nucleophosmin OS=Mus musculus OX=10090 GN=Npm1 PE=1 SV=1	0	0	0	5	3	6	1.06926
Q61937_K221	Npm1	SK*GQESFK	NPM_MOUSE Nucleophosmin OS=Mus musculus OX=10090 GN=Npm1 PE=1 SV=1	0	0	3	6	6	4	0.973795
Q61937_K227	Npm1	SKGQESFK*K	NPM_MOUSE Nucleophosmin OS=Mus musculus OX=10090 GN=Npm1 PE=1 SV=1	0	0	0	0	1	0	1.40845
Q61937_K234	Npm1	TPK*TPK	NPM_MOUSE Nucleophosmin OS=Mus musculus OX=10090 GN=Npm1 PE=1 SV=1	0	5	1	6	6	5	0.987994
Q61937_K237	Npm1	TPK*GPSSVEDIK	NPM_MOUSE Nucleophosmin OS=Mus musculus OX=10090 GN=Npm1 PE=1 SV=1	0	3	6	6	6	6	1.03665
Q61937_K246	Npm1	GPSSVEDIK*AK	NPM_MOUSE Nucleophosmin OS=Mus musculus OX=10090 GN=Npm1 PE=1 SV=1	0	2	3	6	6	6	1.00724
Q61937_K248	Npm1	AK*MQASIEK	NPM_MOUSE Nucleophosmin OS=Mus musculus OX=10090 GN=Npm1 PE=1 SV=1	0	0	6	6	5	6	0.979727
Q61937_K255	Npm1	MQASIEK*GGSLPK	NPM_MOUSE Nucleophosmin OS=Mus musculus OX=10090 GN=Npm1 PE=1 SV=1	0	0	4	3	3	6	1.1027
Q61937_K261	Npm1	GGSLPK*VEAK	NPM_MOUSE Nucleophosmin OS=Mus musculus OX=10090 GN=Npm1 PE=1 SV=1	0	0	0	3	5	5	1.10521
Q61937_K265	Npm1	VEAK*FINYVK	NPM_MOUSE Nucleophosmin OS=Mus musculus OX=10090 GN=Npm1 PE=1 SV=1	0	0	2	4	0	4	1.0622
Q61937_K27	Npm1	ADK*DYHFK	NPM_MOUSE Nucleophosmin OS=Mus musculus OX=10090 GN=Npm1 PE=1 SV=1	0	0	2	1	6	3	1.09609
Q61937_K32	Npm1	ADKDYHFK*VDNDENEHQLSLR	NPM_MOUSE Nucleophosmin OS=Mus musculus OX=10090 GN=Npm1 PE=1 SV=1	0	0	5	5	6	6	1.07387
Q61937_K54	Npm1	TVSLGAGAK*DELHIVEAEAMNYEGSPIK	NPM_MOUSE Nucleophosmin OS=Mus musculus OX=10090 GN=Npm1 PE=1 SV=1	0	0	0	0	0	1	1.44928
Q61990_K115	Pcbp2	LVVPASQCGSLIGK*GGCK	PCBP2_MOUSE Poly(rC)-binding protein 2 OS=Mus musculus OX=10090 GN=Pcbp2 PE=1 SV=1	0	0	0	3	1	3	0.935739
Q61990_K306	Pcbp2	QGAK*INEIR	PCBP2_MOUSE Poly(rC)-binding protein 2 OS=Mus musculus OX=10090 GN=Pcbp2 PE=1 SV=1	0	0	6	6	6	6	1.01755
Q62018_K770	Ctr9	LATSVLK*DEK	CTR9_MOUSE RNA polymerase-associated protein CTR9 homolog OS=Mus musculus OX=10090 GN=Ctr9 PE=1 SV=2	0	0	0	1	0	1	0.94028
Q62093_K36	Srsf2	VFEK*YGR	SRSF2_MOUSE Serine/arginine-rich splicing factor 2 OS=Mus musculus OX=10090 GN=Srsf2 PE=1 SV=4	0	0	0	4	0	4	1.10006
Q62167_K118	Ddx3x	SGFGK*FER	DDX3X_MOUSE ATP-dependent RNA helicase DDX3X OS=Mus musculus OX=10090 GN=Ddx3x PE=1 SV=3	0	0	0	3	4	1	1.03123
Q62167_K215	Ddx3x	HAIPIIK*EK	DDX3X_MOUSE ATP-dependent RNA helicase DDX3X OS=Mus musculus OX=10090 GN=Ddx3x PE=1 SV=3	0	0	0	0	0	1	0.96154
Q62167_K255	Ddx3x	AMK*ENGR	DDX3X_MOUSE ATP-dependent RNA helicase DDX3X OS=Mus musculus OX=10090 GN=Ddx3x PE=1 SV=3	0	0	0	6	4	5	0.95472
Q62167_K491	Ddx3x	SGK*SPILVATAVAAR	DDX3X_MOUSE ATP-dependent RNA helicase DDX3X OS=Mus musculus OX=10090 GN=Ddx3x PE=1 SV=3	0	0	0	0	0	2	0.887505
Q62167_K50	Ddx3x	EATK*GFYDK	DDX3X_MOUSE ATP-dependent RNA helicase DDX3X OS=Mus musculus OX=10090 GN=Ddx3x PE=1 SV=3	0	0	0	0	0	3	1.4968
Q62203_K10	Sf3a2	PGGK*TGSGGVASSSESNR	SF3A2_MOUSE Splicing factor 3A subunit 2 OS=Mus musculus OX=10090 GN=Sf3a2 PE=1 SV=2	0	0	0	0	1	0	1
Q62203_K118	Sf3a2	PGYK*VTK	SF3A2_MOUSE Splicing factor 3A subunit 2 OS=Mus musculus OX=10090 GN=Sf3a2 PE=1 SV=2	0	0	0	0	2	0	1.0363
Q62318_K189	Trim28	YTK*DHTVR	TIF1B_MOUSE Transcription intermediary factor 1-beta OS=Mus musculus OX=10090 GN=Trim28 PE=1 SV=3	0	0	0	0	3	0	1.16163
Q62318_K200	Trim28	STGPAK*TR	TIF1B_MOUSE Transcription intermediary factor 1-beta OS=Mus musculus OX=10090 GN=Trim28 PE=1 SV=3	0	0	0	2	0	1	0.827147
Q62318_K267	Trim28	LGDK*HATLQK	TIF1B_MOUSE Transcription intermediary factor 1-beta OS=Mus musculus OX=10090 GN=Trim28 PE=1 SV=3	0	0	1	0	6	4	1.04721
Q62318_K290	Trim28	QVSDVQK*R	TIF1B_MOUSE Transcription intermediary factor 1-beta OS=Mus musculus OX=10090 GN=Trim28 PE=1 SV=3	0	0	0	0	0	3	0.84702
Q62318_K320	Trim28	VLVNDAQK*VTEGQQER	TIF1B_MOUSE Transcription intermediary factor 1-beta OS=Mus musculus OX=10090 GN=Trim28 PE=1 SV=3	0	0	0	0	0	1	1.35135
Q62348_K187	Tsn	LLNLK*NDSLR	TSN_MOUSE Translin OS=Mus musculus OX=10090 GN=Tsn PE=1 SV=1	0	0	0	0	2	0	1.06394
Q62348_K219	Tsn	GFNK*ETAAACGEK	TSN_MOUSE Translin OS=Mus musculus OX=10090 GN=Tsn PE=1 SV=1	0	0	0	0	4	2	0.956263
Q62376_K162	Snrnp70	DMHSAYK*HADGK	RU17_MOUSE U1 small nuclear ribonucleoprotein 70 kDa OS=Mus musculus OX=10090 GN=Snrnp70 PE=1 SV=2	0	0	0	0	5	0	1.03485
Q62376_K27	Snrnp70	DPIPYLPPLEK*LPHEK	RU17_MOUSE U1 small nuclear ribonucleoprotein 70 kDa OS=Mus musculus OX=10090 GN=Snrnp70 PE=1 SV=2	0	0	0	0	2	0	1.10058
Q62393_K179	Tpd52	SFEEK*VENLK	TPD52_MOUSE Tumor protein D52 OS=Mus musculus OX=10090 GN=Tpd52 PE=1 SV=2	0	0	0	0	1	0	1.07527
Q62393_K184	Tpd52	VENLK*SK	TPD52_MOUSE Tumor protein D52 OS=Mus musculus OX=10090 GN=Tpd52 PE=1 SV=2	0	0	0	1	0	0	1.07527
Q62422_K82	Ostf1	TGLIPSNYVAEQAESIDNPLHEAAK*R	OSTF1_MOUSE Osteoclast-stimulating factor 1 OS=Mus musculus OX=10090 GN=Ostf1 PE=1 SV=2	0	0	0	0	1	0	0.9901
Q62426_K30	Cstb	SQLESK*ENQK	CYTB_MOUSE Cystatin-B OS=Mus musculus OX=10090 GN=Cstb PE=1 SV=1	0	0	0	1	1	2	0.864223
Q62426_K44	Cstb	AISFK*R	CYTB_MOUSE Cystatin-B OS=Mus musculus OX=10090 GN=Cstb PE=1 SV=1	0	0	0	0	0	1	1.16279
Q62446_K121	Fkbp3	KGDK*TNFPK	FKBP3_MOUSE Peptidyl-prolyl cis-trans isomerase FKBP3 OS=Mus musculus OX=10090 GN=Fkbp3 PE=1 SV=2	0	0	0	0	2	0	1.42712
Q62448_K31	Eif4g2	GAPQHYPK*TAGNSEFLGK	IF4G2_MOUSE Eukaryotic translation initiation factor 4 gamma 2 OS=Mus musculus OX=10090 GN=Eif4g2 PE=1 SV=2	0	0	0	0	0	2	1.33103
Q62448_K313	Eif4g2	K*AFLDNGPK	IF4G2_MOUSE Eukaryotic translation initiation factor 4 gamma 2 OS=Mus musculus OX=10090 GN=Eif4g2 PE=1 SV=2	0	0	2	3	4	4	0.945396
Q62448_K734	Eif4g2	LEK*ELLK	IF4G2_MOUSE Eukaryotic translation initiation factor 4 gamma 2 OS=Mus musculus OX=10090 GN=Eif4g2 PE=1 SV=2	0	0	0	3	0	0	0.9552
Q62448_K87	Eif4g2	GILNK*LTPEK	IF4G2_MOUSE Eukaryotic translation initiation factor 4 gamma 2 OS=Mus musculus OX=10090 GN=Eif4g2 PE=1 SV=2	0	0	0	0	0	2	1.32191
Q63844_K221	Mapk3	APEIMLNSK*GYTK	MK03_MOUSE Mitogen-activated protein kinase 3 OS=Mus musculus OX=10090 GN=Mapk3 PE=1 SV=5	0	0	0	0	1	1	1.24673
Q63850_K375	Nup62	TLIENGEK*ITSLHR	NUP62_MOUSE Nuclear pore glycoprotein p62 OS=Mus musculus OX=10090 GN=Nup62 PE=1 SV=2	0	0	0	0	0	1	0.68966
Q64127_K198	Trim24	FTK*DHTVR	TIF1A_MOUSE Transcription intermediary factor 1-alpha OS=Mus musculus OX=10090 GN=Trim24 PE=1 SV=1	0	0	0	0	0	1	0.95238
Q64152_K169	Btf3	LAEALPK*QSVDGK	BTF3_MOUSE Transcription factor BTF3 OS=Mus musculus OX=10090 GN=Btf3 PE=1 SV=3	0	0	0	0	0	1	1.14943
Q64291_K459	Krt12	DPNK*TR	K1C12_MOUSE Keratin, type I cytoskeletal 12 OS=Mus musculus OX=10090 GN=Krt12 PE=1 SV=2	0	0	0	0	0	2	0.939835
Q64324_K320	Stxbp2	LTTDK*ANIK	STXB2_MOUSE Syntaxin-binding protein 2 OS=Mus musculus OX=10090 GN=Stxbp2 PE=1 SV=1	0	0	0	0	0	4	0.990997
Q64337_K13	Sqstm1	AYLLGK*EEATR	SQSTM_MOUSE Sequestosome-1 OS=Mus musculus OX=10090 GN=Sqstm1 PE=1 SV=1	0	0	0	4	4	4	1.14717
Q64433_K36	Hspe1	GGIMLPEK*SQGK	CH10_MOUSE 10 kDa heat shock protein, mitochondrial OS=Mus musculus OX=10090 GN=Hspe1 PE=1 SV=2	0	0	0	0	0	3	0.76781
Q64433_K56	Hspe1	GK*SGEIEPVSVK	CH10_MOUSE 10 kDa heat shock protein, mitochondrial OS=Mus musculus OX=10090 GN=Hspe1 PE=1 SV=2	0	0	4	3	5	6	1.04784
Q64433_K70	Hspe1	VGDK*VLLPEYGGTK	CH10_MOUSE 10 kDa heat shock protein, mitochondrial OS=Mus musculus OX=10090 GN=Hspe1 PE=1 SV=2	0	0	3	1	3	3	0.971189
Q64475_K21	H2bc3	AISK*AQK	H2B1B_MOUSE Histone H2B type 1-B OS=Mus musculus OX=10090 GN=H2bc3 PE=1 SV=3	0	0	0	4	1	2	1.13916
Q64475_K6	H2bc3	PEPSK*SAPAPK	H2B1B_MOUSE Histone H2B type 1-B OS=Mus musculus OX=10090 GN=H2bc3 PE=1 SV=3	1	1	6	2	3	6	1.06482
Q64478_K21	H2bc9	AITK*AQK	H2B1H_MOUSE Histone H2B type 1-H OS=Mus musculus OX=10090 GN=H2bc9 PE=1 SV=3	0	0	0	3	0	0	1.15499
Q64511_K1146	Top2b	EK*VEELIK	TOP2B_MOUSE DNA topoisomerase 2-beta OS=Mus musculus OX=10090 GN=Top2b PE=1 SV=2	0	0	0	0	1	0	1.14943
Q64514_K1213	Tpp2	GLK*FATK	TPP2_MOUSE Tripeptidyl-peptidase 2 OS=Mus musculus OX=10090 GN=Tpp2 PE=1 SV=3	0	0	0	0	0	2	0.90977
Q64523_K125	H2ac20	TESHK*AK	H2A2C_MOUSE Histone H2A type 2-C OS=Mus musculus OX=10090 GN=H2ac20 PE=1 SV=3	0	0	0	0	4	1	1.08659
Q64525_K21	Hist2h2bb	AVTK*VQK	H2B2B_MOUSE Histone H2B type 2-B OS=Mus musculus OX=10090 GN=Hist2h2bb PE=1 SV=3	0	0	0	5	0	4	1.13196
Q64525_K6	Hist2h2bb	PDPAK*SAPAPK	H2B2B_MOUSE Histone H2B type 2-B OS=Mus musculus OX=10090 GN=Hist2h2bb PE=1 SV=3	0	0	6	6	5	6	1.06975
Q64727_K581	Vcl	ALASQLQDSLK*DLK	VINC_MOUSE Vinculin OS=Mus musculus OX=10090 GN=Vcl PE=1 SV=4	0	0	0	0	0	1	1.05263
Q64737_K419	Gart	K*DIGFR	PUR2_MOUSE Trifunctional purine biosynthetic protein adenosine-3 OS=Mus musculus OX=10090 GN=Gart PE=1 SV=3	0	0	0	0	0	1	0.96154
Q68FD5_K1529	Cltc	QSVELCK*K	CLH1_MOUSE Clathrin heavy chain 1 OS=Mus musculus OX=10090 GN=Cltc PE=1 SV=3	0	0	0	1	0	1	0.997485
Q68FD5_K637	Cltc	ALEHFTDLYDIK*R	CLH1_MOUSE Clathrin heavy chain 1 OS=Mus musculus OX=10090 GN=Cltc PE=1 SV=3	0	0	0	1	1	0	0.988125
Q68FD5_K742	Cltc	TGQIK*EVER	CLH1_MOUSE Clathrin heavy chain 1 OS=Mus musculus OX=10090 GN=Cltc PE=1 SV=3	0	0	1	1	2	2	1.14913
Q68FD5_K760	Cltc	VK*NFLK	CLH1_MOUSE Clathrin heavy chain 1 OS=Mus musculus OX=10090 GN=Cltc PE=1 SV=3	0	0	0	0	1	1	0.911805
Q68FD5_K764	Cltc	NFLK*EAK	CLH1_MOUSE Clathrin heavy chain 1 OS=Mus musculus OX=10090 GN=Cltc PE=1 SV=3	0	0	0	0	2	6	0.887871
Q68FL6_K109	Mars1	K*GEDILGPLR	SYMC_MOUSE Methionine--tRNA ligase, cytoplasmic OS=Mus musculus OX=10090 GN=Mars1 PE=1 SV=1	0	0	1	0	0	0	1.1131
Q69Z38_K1278	Peak1	EEVVGK*LR	PEAK1_MOUSE Inactive tyrosine-protein kinase PEAK1 OS=Mus musculus OX=10090 GN=Peak1 PE=1 SV=4	0	0	0	0	0	2	0.917875
Q69ZR2_K467	Hectd1	TPLDK*AR	HECD1_MOUSE E3 ubiquitin-protein ligase HECTD1 OS=Mus musculus OX=10090 GN=Hectd1 PE=1 SV=2	0	0	0	0	6	0	1.00931
Q6A026_K124	Pds5a	QLK*GLEDTK	PDS5A_MOUSE Sister chromatid cohesion protein PDS5 homolog A OS=Mus musculus OX=10090 GN=Pds5a PE=1 SV=3	0	0	0	0	0	1	1.08696
Q6A026_K29	Pds5a	VK*EITDK	PDS5A_MOUSE Sister chromatid cohesion protein PDS5 homolog A OS=Mus musculus OX=10090 GN=Pds5a PE=1 SV=3	0	0	0	0	2	0	1.25313
Q6A026_K365	Pds5a	DLTEYLK*VR	PDS5A_MOUSE Sister chromatid cohesion protein PDS5 homolog A OS=Mus musculus OX=10090 GN=Pds5a PE=1 SV=3	0	0	0	1	0	0	1.11111
Q6A028_K5	Swap70	GLK*DELLK	SWP70_MOUSE Switch-associated protein 70 OS=Mus musculus OX=10090 GN=Swap70 PE=1 SV=2	0	0	0	0	0	1	0.96154
Q6A0D4_K147	Rftn1	K*VQEAASQGLK	RFTN1_MOUSE Raftlin OS=Mus musculus OX=10090 GN=Rftn1 PE=1 SV=4	0	0	3	3	2	0	1.00389
Q6DFW4_K415	Nop58	ALAK*AEK	NOP58_MOUSE Nucleolar protein 58 OS=Mus musculus OX=10090 GN=Nop58 PE=1 SV=1	0	0	0	0	0	2	0.913925
Q6DFW4_K422	Nop58	YEHK*SEVK	NOP58_MOUSE Nucleolar protein 58 OS=Mus musculus OX=10090 GN=Nop58 PE=1 SV=1	0	0	0	0	3	0	1.23301
Q6DFW4_K45	Nop58	LK*HFEK	NOP58_MOUSE Nucleolar protein 58 OS=Mus musculus OX=10090 GN=Nop58 PE=1 SV=1	0	0	0	0	4	0	0.971872
Q6DFW4_K99	Nop58	LGGVIK*EK	NOP58_MOUSE Nucleolar protein 58 OS=Mus musculus OX=10090 GN=Nop58 PE=1 SV=1	0	0	0	0	0	2	0.914945
Q6DVA0_K194	Lemd2	PGLK*GSR	LEMD2_MOUSE LEM domain-containing protein 2 OS=Mus musculus OX=10090 GN=Lemd2 PE=1 SV=1	0	0	0	0	2	0	1.05468
Q6GQT9_K627	Nomo1	PGVYK*VTPR	NOMO1_MOUSE Nodal modulator 1 OS=Mus musculus OX=10090 GN=Nomo1 PE=1 SV=1	0	0	0	0	1	0	1
Q6GSS7_K96	Hist2h2aa1	NDEELNK*LLGK	H2A2A_MOUSE Histone H2A type 2-A OS=Mus musculus OX=10090 GN=Hist2h2aa1 PE=1 SV=3	0	0	0	1	1	0	1.11607
Q6IRU2_K141	Tpm4	LVILEGELK*R	TPM4_MOUSE Tropomyosin alpha-4 chain OS=Mus musculus OX=10090 GN=Tpm4 PE=1 SV=3	0	0	0	0	0	2	0.881535
Q6IRU2_K169	Tpm4	NVTNNLK*SLEAASEK	TPM4_MOUSE Tropomyosin alpha-4 chain OS=Mus musculus OX=10090 GN=Tpm4 PE=1 SV=3	0	0	1	1	1	6	1.01307
Q6IRU2_K212	Tpm4	TVSK*LEK	TPM4_MOUSE Tropomyosin alpha-4 chain OS=Mus musculus OX=10090 GN=Tpm4 PE=1 SV=3	0	0	0	0	0	1	0.81301
Q6IRU2_K223	Tpm4	TIDDLEEK*LAQAK	TPM4_MOUSE Tropomyosin alpha-4 chain OS=Mus musculus OX=10090 GN=Tpm4 PE=1 SV=3	0	0	0	0	0	1	0.97087
Q6IRU5_K204	Cltb	VAQLCDFNPK*SSK	CLCB_MOUSE Clathrin light chain B OS=Mus musculus OX=10090 GN=Cltb PE=1 SV=1	0	0	0	0	2	3	0.819066
Q6IRU5_K207	Cltb	SSK*QCK	CLCB_MOUSE Clathrin light chain B OS=Mus musculus OX=10090 GN=Cltb PE=1 SV=1	0	0	0	1	0	0	1.06491
Q6NV83_K80	U2surp	PLLENK*LK	SR140_MOUSE U2 snRNP-associated SURP motif-containing protein OS=Mus musculus OX=10090 GN=U2surp PE=1 SV=3	0	0	0	1	5	4	1.05296
Q6NV83_K972	U2surp	SSHK*DSPR	SR140_MOUSE U2 snRNP-associated SURP motif-containing protein OS=Mus musculus OX=10090 GN=U2surp PE=1 SV=3	0	0	0	0	1	0	0.92593
Q6NZF1_K355	Zc3h11a	GELQTK*LK	ZC11A_MOUSE Zinc finger CCCH domain-containing protein 11A OS=Mus musculus OX=10090 GN=Zc3h11a PE=1 SV=1	0	0	0	0	1	0	1.14943
Q6NZJ6_K1185	Eif4g1	TPATK*R	IF4G1_MOUSE Eukaryotic translation initiation factor 4 gamma 1 OS=Mus musculus OX=10090 GN=Eif4g1 PE=1 SV=1	0	0	0	0	1	0	0.90917
Q6NZJ6_K885	Eif4g1	LK*EELEEAR	IF4G1_MOUSE Eukaryotic translation initiation factor 4 gamma 1 OS=Mus musculus OX=10090 GN=Eif4g1 PE=1 SV=1	0	0	0	0	0	2	1.08753
Q6NZJ6_K954	Eif4g1	DLDFAK*AK	IF4G1_MOUSE Eukaryotic translation initiation factor 4 gamma 1 OS=Mus musculus OX=10090 GN=Eif4g1 PE=1 SV=1	0	0	0	3	3	3	1.04738
Q6P1D7_K275	Slx4	LENAFSEK*IR	SLX4_MOUSE Structure-specific endonuclease subunit SLX4 OS=Mus musculus OX=10090 GN=Slx4 PE=1 SV=1	0	0	0	0	0	1	0.95238
Q6P4T2_K285	Snrnp200	K*ADEVLEILK	U520_MOUSE U5 small nuclear ribonucleoprotein 200 kDa helicase OS=Mus musculus OX=10090 GN=Snrnp200 PE=1 SV=1	0	0	2	4	4	1	0.914149
Q6P4T2_K944	Snrnp200	SPTLYGISHDDLK*GDPLLDQR	U520_MOUSE U5 small nuclear ribonucleoprotein 200 kDa helicase OS=Mus musculus OX=10090 GN=Snrnp200 PE=1 SV=1	0	0	0	0	1	0	1.04167
Q6P542_K535	Abcf1	MYQQK*QK	ABCF1_MOUSE ATP-binding cassette sub-family F member 1 OS=Mus musculus OX=10090 GN=Abcf1 PE=1 SV=1	0	0	0	0	3	0	1.31536
Q6P5B0_K48	Rrp12	PSGK*SDLTVDAVK	RRP12_MOUSE RRP12-like protein OS=Mus musculus OX=10090 GN=Rrp12 PE=1 SV=1	0	0	0	0	0	2	1.16263
Q6P5B0_K819	Rrp12	FVQSHLDDLK*K	RRP12_MOUSE RRP12-like protein OS=Mus musculus OX=10090 GN=Rrp12 PE=1 SV=1	0	0	0	0	2	0	0.94414
Q6P5D8_K1704	Smchd1	ITEQNELK*K	SMHD1_MOUSE Structural maintenance of chromosomes flexible hinge domain-containing protein 1 OS=Mus musculus OX=10090 GN=Smchd1 PE=1 SV=2	0	0	0	0	0	2	1.30385
Q6P5D8_K1959	Smchd1	IEQK*LGMTPVR	SMHD1_MOUSE Structural maintenance of chromosomes flexible hinge domain-containing protein 1 OS=Mus musculus OX=10090 GN=Smchd1 PE=1 SV=2	0	0	0	0	0	2	1.33486
Q6P5F9_K1049	Xpo1	QAQEEK*HK	XPO1_MOUSE Exportin-1 OS=Mus musculus OX=10090 GN=Xpo1 PE=1 SV=1	0	0	0	0	1	0	1.0101
Q6P5F9_K594	Xpo1	IAQK*CR	XPO1_MOUSE Exportin-1 OS=Mus musculus OX=10090 GN=Xpo1 PE=1 SV=1	0	0	0	2	0	2	0.79202
Q6P5F9_K693	Xpo1	QLGSILK*TNVR	XPO1_MOUSE Exportin-1 OS=Mus musculus OX=10090 GN=Xpo1 PE=1 SV=1	0	0	0	0	0	2	0.97124
Q6P6L0_K147	Filip1l	VVEK*HK	FIL1L_MOUSE Filamin A-interacting protein 1-like OS=Mus musculus OX=10090 GN=Filip1l PE=1 SV=2	0	1	0	0	0	0	1.14943
Q6P9L6_K1280	Kif15	TNLEEVQSALHSK*EK	KIF15_MOUSE Kinesin-like protein KIF15 OS=Mus musculus OX=10090 GN=Kif15 PE=1 SV=1	0	0	0	0	0	1	1.05263
Q6P9Z1_K189	Smarcd3	VEGK*LLDDPSK	SMRD3_MOUSE SWI/SNF-related matrix-associated actin-dependent regulator of chromatin subfamily D member 3 OS=Mus musculus OX=10090 GN=Smarcd3 PE=1 SV=2	0	0	0	0	0	2	0.838905
Q6PAK3_K168	Prmt8	GK*VEEVELPVEK	ANM8_MOUSE Protein arginine N-methyltransferase 8 OS=Mus musculus OX=10090 GN=Prmt8 PE=1 SV=2	0	0	1	1	2	4	0.979916
Q6PAM1_K233	Txlna	GEHSK*AVLAR	TXLNA_MOUSE Alpha-taxilin OS=Mus musculus OX=10090 GN=Txlna PE=1 SV=1	0	0	0	0	1	0	1
Q6PAM1_K256	Txlna	SLK*EEGVQR	TXLNA_MOUSE Alpha-taxilin OS=Mus musculus OX=10090 GN=Txlna PE=1 SV=1	0	0	2	0	0	5	0.984321
Q6PB66_K291	Lrpprc	QILEK*VEK	LPPRC_MOUSE Leucine-rich PPR motif-containing protein, mitochondrial OS=Mus musculus OX=10090 GN=Lrpprc PE=1 SV=2	0	0	0	0	0	2	0.960655
Q6PDL0_K50	Dync1li2	SK*LPSGK	DC1L2_MOUSE Cytoplasmic dynein 1 light intermediate chain 2 OS=Mus musculus OX=10090 GN=Dync1li2 PE=1 SV=2	0	0	0	1	0	0	0.9901
Q6PDM2_K174	Srsf1	K*LDNTK	SRSF1_MOUSE Serine/arginine-rich splicing factor 1 OS=Mus musculus OX=10090 GN=Srsf1 PE=1 SV=3	0	0	3	5	4	3	1.0217
Q6PDM2_K179	Srsf1	LDNTK*FR	SRSF1_MOUSE Serine/arginine-rich splicing factor 1 OS=Mus musculus OX=10090 GN=Srsf1 PE=1 SV=3	0	0	0	3	0	2	0.89327
Q6PDM2_K193	Srsf1	VK*VDGPR	SRSF1_MOUSE Serine/arginine-rich splicing factor 1 OS=Mus musculus OX=10090 GN=Srsf1 PE=1 SV=3	0	0	3	2	0	5	0.966681
Q6PDM2_K30	Srsf1	TK*DIEDVFYK	SRSF1_MOUSE Serine/arginine-rich splicing factor 1 OS=Mus musculus OX=10090 GN=Srsf1 PE=1 SV=3	0	0	0	0	2	0	1.23109
Q6PDM2_K48	Srsf1	DIDLK*NR	SRSF1_MOUSE Serine/arginine-rich splicing factor 1 OS=Mus musculus OX=10090 GN=Srsf1 PE=1 SV=3	0	0	0	0	0	1	0.95238
Q6PDQ2_K288	Chd4	VAPLK*IK	CHD4_MOUSE Chromodomain-helicase-DNA-binding protein 4 OS=Mus musculus OX=10090 GN=Chd4 PE=1 SV=1	0	0	0	0	1	1	0.98086
Q6PDQ2_K952	Chd4	LK*ADVFK	CHD4_MOUSE Chromodomain-helicase-DNA-binding protein 4 OS=Mus musculus OX=10090 GN=Chd4 PE=1 SV=1	0	0	0	0	0	4	1.15999
Q6PFD9_K1039	Nup98	LPISASHSSK*SR	NUP98_MOUSE Nuclear pore complex protein Nup98-Nup96 OS=Mus musculus OX=10090 GN=Nup98 PE=1 SV=2	0	0	0	0	1	0	0.9009
Q6PGC1_K273	Dhx29	LLDAK*EQAAAFK	DHX29_MOUSE ATP-dependent RNA helicase DHX29 OS=Mus musculus OX=10090 GN=Dhx29 PE=1 SV=1	0	0	0	0	2	1	1.05765
Q6PGG2_K503	Gmip	GPAK*CR	GMIP_MOUSE GEM-interacting protein OS=Mus musculus OX=10090 GN=Gmip PE=1 SV=1	0	0	0	3	1	3	1.07965
Q6PGG2_K933	Gmip	NPLPK*HFEITQETAR	GMIP_MOUSE GEM-interacting protein OS=Mus musculus OX=10090 GN=Gmip PE=1 SV=1	0	0	0	0	2	0	0.8256
Q6PGH1_K40	Bud31	EAETEPHEGK*R	BUD31_MOUSE Protein BUD31 homolog OS=Mus musculus OX=10090 GN=Bud31 PE=1 SV=2	0	0	0	0	1	0	1.0101
Q6Q899_K459	Ddx58	DNVAELEQVVYKPQK*ISR	DDX58_MOUSE Antiviral innate immune response receptor RIG-I OS=Mus musculus OX=10090 GN=Ddx58 PE=1 SV=2	0	0	0	0	2	0	0.900975
Q6Q899_K594	Ddx58	RFEEK*LEELEK	DDX58_MOUSE Antiviral innate immune response receptor RIG-I OS=Mus musculus OX=10090 GN=Ddx58 PE=1 SV=2	0	0	0	0	1	0	0.8
Q6Q899_K808	Ddx58	K*LLCGK	DDX58_MOUSE Antiviral innate immune response receptor RIG-I OS=Mus musculus OX=10090 GN=Ddx58 PE=1 SV=2	0	0	0	0	0	2	0.98553
Q6Y7W8_K516	Gigyf2	LTSK*LQEHR	GGYF2_MOUSE GRB10-interacting GYF protein 2 OS=Mus musculus OX=10090 GN=Gigyf2 PE=1 SV=2	0	0	0	0	0	1	1.17647
Q6ZQ06_K968	Cep162	K*LEADLEGK	CE162_MOUSE Centrosomal protein of 162 kDa OS=Mus musculus OX=10090 GN=Cep162 PE=1 SV=2	0	0	0	3	6	0	1.09183
Q6ZQ38_K577	Cand1	LK*AADIDQEVK	CAND1_MOUSE Cullin-associated NEDD8-dissociated protein 1 OS=Mus musculus OX=10090 GN=Cand1 PE=1 SV=2	0	0	0	0	0	2	1.06537
Q6ZQ58_K769	Larp1	TPQLK*DSSQTPR	LARP1_MOUSE La-related protein 1 OS=Mus musculus OX=10090 GN=Larp1 PE=1 SV=3	0	0	0	0	1	0	1.36265
Q6ZQL4_K366	Wdr43	VALNSK*DTHICLER	WDR43_MOUSE WD repeat-containing protein 43 OS=Mus musculus OX=10090 GN=Wdr43 PE=1 SV=2	0	0	0	0	0	4	0.955673
Q6ZQL4_K489	Wdr43	NVNLIK*R	WDR43_MOUSE WD repeat-containing protein 43 OS=Mus musculus OX=10090 GN=Wdr43 PE=1 SV=2	0	0	0	0	0	4	0.82032
Q6ZWN5_K11	Rps9	K*TYVTPR	RS9_MOUSE 40S ribosomal protein S9 OS=Mus musculus OX=10090 GN=Rps9 PE=1 SV=3	0	0	1	3	0	5	0.902797
Q6ZWN5_K155	Rps9	LDSQK*HIDFSLR	RS9_MOUSE 40S ribosomal protein S9 OS=Mus musculus OX=10090 GN=Rps9 PE=1 SV=3	0	0	0	0	5	0	1.0174
Q6ZWN5_K30	Rps9	LDQELK*LIGEYGLR	RS9_MOUSE 40S ribosomal protein S9 OS=Mus musculus OX=10090 GN=Rps9 PE=1 SV=3	0	0	0	0	2	0	0.890605
Q6ZWN5_K91	Rps9	IGVLDEGK*MK	RS9_MOUSE 40S ribosomal protein S9 OS=Mus musculus OX=10090 GN=Rps9 PE=1 SV=3	0	0	1	6	6	6	1.04654
Q6ZWN5_K93	Rps9	MK*LDYILGLK	RS9_MOUSE 40S ribosomal protein S9 OS=Mus musculus OX=10090 GN=Rps9 PE=1 SV=3	0	0	2	0	1	0	1.04642
Q6ZWV3_K101	Rpl10	INK*MLSCAGADR	RL10_MOUSE 60S ribosomal protein L10 OS=Mus musculus OX=10090 GN=Rpl10 PE=1 SV=3	0	1	6	6	6	6	1.08151
Q6ZWV3_K121	Rpl10	GAFGK*PQGTVAR	RL10_MOUSE 60S ribosomal protein L10 OS=Mus musculus OX=10090 GN=Rpl10 PE=1 SV=3	0	0	4	5	6	6	1.04372
Q6ZWV3_K145	Rpl10	LQNK*EHVIEALR	RL10_MOUSE 60S ribosomal protein L10 OS=Mus musculus OX=10090 GN=Rpl10 PE=1 SV=3	0	0	0	0	0	2	0.76373
Q6ZWV3_K208	Rpl10	GPLDK*WR	RL10_MOUSE 60S ribosomal protein L10 OS=Mus musculus OX=10090 GN=Rpl10 PE=1 SV=3	0	0	0	0	2	0	1.05399
Q6ZWV3_K30	Rpl10	GVPDAK*IR	RL10_MOUSE 60S ribosomal protein L10 OS=Mus musculus OX=10090 GN=Rpl10 PE=1 SV=3	0	0	0	0	1	5	1.08078
Q6ZWV3_K82	Rpl10	SCGK*DGFHIR	RL10_MOUSE 60S ribosomal protein L10 OS=Mus musculus OX=10090 GN=Rpl10 PE=1 SV=3	0	0	0	0	1	0	0.86957
Q6ZWV7_K43	Rpl35	VTGGAASK*LSK	RL35_MOUSE 60S ribosomal protein L35 OS=Mus musculus OX=10090 GN=Rpl35 PE=1 SV=1	0	0	0	3	1	2	1.11298
Q6ZWX6_K190	Eif2s1	LTPQAVK*IR	IF2A_MOUSE Eukaryotic translation initiation factor 2 subunit 1 OS=Mus musculus OX=10090 GN=Eif2s1 PE=1 SV=3	0	0	0	0	0	1	1.36986
Q6ZWY9_K6	H2bc4	PEPAK*SAPAPK	H2B1C_MOUSE Histone H2B type 1-C/E/G OS=Mus musculus OX=10090 GN=H2bc4 PE=1 SV=3	0	2	3	3	3	3	1.05503
Q71LX4_K148	Tln2	KEEGTGTLK*K	TLN2_MOUSE Talin-2 OS=Mus musculus OX=10090 GN=Tln2 PE=1 SV=3	0	0	0	1	0	0	1
Q76MZ3_K188	Ppp2r1a	AAASK*LGEFAK	2AAA_MOUSE Serine/threonine-protein phosphatase 2A 65 kDa regulatory subunit A alpha isoform OS=Mus musculus OX=10090 GN=Ppp2r1a PE=1 SV=3	0	0	0	0	0	1	1.0101
Q76MZ3_K280	Ppp2r1a	AVGPEITK*TDLVPAFQNLMK	2AAA_MOUSE Serine/threonine-protein phosphatase 2A 65 kDa regulatory subunit A alpha isoform OS=Mus musculus OX=10090 GN=Ppp2r1a PE=1 SV=3	0	0	0	1	0	0	0.9901
Q78PG9_K125	Ccdc25	K*VNEILNR	CCD25_MOUSE Coiled-coil domain-containing protein 25 OS=Mus musculus OX=10090 GN=Ccdc25 PE=1 SV=1	0	0	1	0	0	4	0.962308
Q78PY7_K513	Snd1	VADISGDTQK*AK	SND1_MOUSE Staphylococcal nuclease domain-containing protein 1 OS=Mus musculus OX=10090 GN=Snd1 PE=1 SV=1	0	0	0	1	3	2	1.06316
Q78PY7_K752	Snd1	VEK*VESPAK	SND1_MOUSE Staphylococcal nuclease domain-containing protein 1 OS=Mus musculus OX=10090 GN=Snd1 PE=1 SV=1	0	0	0	0	0	2	0.96475
Q78ZA7_K258	Nap1l4	GK*NVTVK	NP1L4_MOUSE Nucleosome assembly protein 1-like 4 OS=Mus musculus OX=10090 GN=Nap1l4 PE=1 SV=1	0	0	0	0	1	0	1.11111
Q7JJ13_K659	Brd2	LPGEK*LGR	BRD2_MOUSE Bromodomain-containing protein 2 OS=Mus musculus OX=10090 GN=Brd2 PE=1 SV=1	0	0	0	1	6	6	0.994473
Q7TMB8_K1038	Cyfip1	IHVK*EGER	CYFP1_MOUSE Cytoplasmic FMR1-interacting protein 1 OS=Mus musculus OX=10090 GN=Cyfip1 PE=1 SV=1	0	0	0	0	2	0	0.91834
Q7TMF2_K83	Eri1	AK*LSEFK	ERI1_MOUSE 3'-5' exoribonuclease 1 OS=Mus musculus OX=10090 GN=Eri1 PE=1 SV=2	0	0	0	0	1	2	0.857623
Q7TMK9_K111	Syncrip	QGTK*VADSSK	HNRPQ_MOUSE Heterogeneous nuclear ribonucleoprotein Q OS=Mus musculus OX=10090 GN=Syncrip PE=1 SV=2	0	0	0	0	3	0	1.17576
Q7TMK9_K125	Syncrip	IK*ALLER	HNRPQ_MOUSE Heterogeneous nuclear ribonucleoprotein Q OS=Mus musculus OX=10090 GN=Syncrip PE=1 SV=2	0	0	0	0	0	4	0.964415
Q7TMK9_K221	Syncrip	EAAQEAVK*LYNNHEIR	HNRPQ_MOUSE Heterogeneous nuclear ribonucleoprotein Q OS=Mus musculus OX=10090 GN=Syncrip PE=1 SV=2	0	0	0	0	1	0	0.92593
Q7TMY4_K110	Thoc7	QILQAK*R	THOC7_MOUSE THO complex subunit 7 homolog OS=Mus musculus OX=10090 GN=Thoc7 PE=1 SV=2	0	0	0	0	0	2	1.18056
Q7TNV0_K106	Dek	KK*PDELR	DEK_MOUSE Protein DEK OS=Mus musculus OX=10090 GN=Dek PE=1 SV=1	0	0	0	0	0	1	0.71942
Q7TNV0_K181	Dek	SGVNSELVK*R	DEK_MOUSE Protein DEK OS=Mus musculus OX=10090 GN=Dek PE=1 SV=1	0	0	0	0	0	4	1.14758
Q7TNV0_K195	Dek	PSGK*PLPK	DEK_MOUSE Protein DEK OS=Mus musculus OX=10090 GN=Dek PE=1 SV=1	0	0	0	0	2	1	0.945767
Q7TNV0_K372	Dek	IK*TTVK	DEK_MOUSE Protein DEK OS=Mus musculus OX=10090 GN=Dek PE=1 SV=1	0	0	0	0	0	1	1.07527
Q7TPV4_K1073	Mybbp1a	ATQTLQTLGEAQSK*GEHQK	MBB1A_MOUSE Myb-binding protein 1A OS=Mus musculus OX=10090 GN=Mybbp1a PE=1 SV=2	0	0	0	0	2	1	1.09406
Q7TPV4_K1288	Mybbp1a	K*HHQEALSTK	MBB1A_MOUSE Myb-binding protein 1A OS=Mus musculus OX=10090 GN=Mybbp1a PE=1 SV=2	0	0	1	0	2	0	1.05652
Q7TPV4_K1302	Mybbp1a	K*SPHPQSALPK	MBB1A_MOUSE Myb-binding protein 1A OS=Mus musculus OX=10090 GN=Mybbp1a PE=1 SV=2	0	0	0	0	1	0	0.82645
Q7TPV4_K200	Mybbp1a	VLK*GNMK	MBB1A_MOUSE Myb-binding protein 1A OS=Mus musculus OX=10090 GN=Mybbp1a PE=1 SV=2	0	0	0	1	0	0	1.28205
Q7TPV4_K257	Mybbp1a	VAANSVK*K	MBB1A_MOUSE Myb-binding protein 1A OS=Mus musculus OX=10090 GN=Mybbp1a PE=1 SV=2	0	0	0	1	0	0	0.84746
Q7TPV4_K275	Mybbp1a	LALK*ESR	MBB1A_MOUSE Myb-binding protein 1A OS=Mus musculus OX=10090 GN=Mybbp1a PE=1 SV=2	0	0	0	0	0	3	1.06365
Q7TPV4_K285	Mybbp1a	K*VLEEGLLK	MBB1A_MOUSE Myb-binding protein 1A OS=Mus musculus OX=10090 GN=Mybbp1a PE=1 SV=2	0	0	0	0	1	1	0.95316
Q7TPV4_K496	Mybbp1a	ATPQIPETK*QHFSFPLDDR	MBB1A_MOUSE Myb-binding protein 1A OS=Mus musculus OX=10090 GN=Mybbp1a PE=1 SV=2	0	0	0	0	0	1	1.14943
Q7TPV4_K54	Mybbp1a	ATEK*LLEYLR	MBB1A_MOUSE Myb-binding protein 1A OS=Mus musculus OX=10090 GN=Mybbp1a PE=1 SV=2	0	0	0	0	2	2	0.978575
Q7TPV4_K624	Mybbp1a	K*SMEQNPR	MBB1A_MOUSE Myb-binding protein 1A OS=Mus musculus OX=10090 GN=Mybbp1a PE=1 SV=2	0	0	4	4	1	5	1.08195
Q7TPV4_K874	Mybbp1a	QEQDLLHK*TAR	MBB1A_MOUSE Myb-binding protein 1A OS=Mus musculus OX=10090 GN=Mybbp1a PE=1 SV=2	0	0	0	0	5	2	0.935999
Q7TPV4_K935	Mybbp1a	VLK*GNTNK	MBB1A_MOUSE Myb-binding protein 1A OS=Mus musculus OX=10090 GN=Mybbp1a PE=1 SV=2	0	0	0	2	0	2	1.0477
Q7TPV4_K940	Mybbp1a	GNTNK*R	MBB1A_MOUSE Myb-binding protein 1A OS=Mus musculus OX=10090 GN=Mybbp1a PE=1 SV=2	0	0	0	3	0	0	0.97887
Q7TQE6_K461	Maco1	LK*AEQEAR	MACOI_MOUSE Macoilin OS=Mus musculus OX=10090 GN=Maco1 PE=1 SV=1	0	0	0	0	0	2	1.14297
Q7TQH0_K324	Atxn2l	TEEEK*HSAVQR	ATX2L_MOUSE Ataxin-2-like protein OS=Mus musculus OX=10090 GN=Atxn2l PE=1 SV=1	0	0	0	0	1	0	1.04167
Q7TT37_K1056	Elp1	TLAGK*LVEQR	ELP1_MOUSE Elongator complex protein 1 OS=Mus musculus OX=10090 GN=Elp1 PE=1 SV=2	0	0	0	0	1	0	1.38889
Q80SY5_K106	Prpf38b	K*TAGQTGMCGGVR	PR38B_MOUSE Pre-mRNA-splicing factor 38B OS=Mus musculus OX=10090 GN=Prpf38b PE=1 SV=1	0	0	1	0	0	0	0.88496
Q80TF3_K783	Pcdh19	ISK*NDIR	PCD19_MOUSE Protocadherin-19 OS=Mus musculus OX=10090 GN=Pcdh19 PE=1 SV=3	0	0	0	2	0	1	0.97249
Q80TM9_K942	Nisch	NSFK*LSR	NISCH_MOUSE Nischarin OS=Mus musculus OX=10090 GN=Nisch PE=1 SV=2	0	0	0	0	0	1	1.0101
Q80TS8_K666	Sel1l3	LK*DDEILK	SE1L3_MOUSE Protein sel-1 homolog 3 OS=Mus musculus OX=10090 GN=Sel1l3 PE=2 SV=3	0	0	0	0	1	0	1.0989
Q80TV8_K870	Clasp1	K*EGLLGLQNLLK	CLAP1_MOUSE CLIP-associating protein 1 OS=Mus musculus OX=10090 GN=Clasp1 PE=1 SV=2	0	0	1	0	0	0	0.78125
Q80UG5_K488	Septin9	LVNEK*FR	SEPT9_MOUSE Septin-9 OS=Mus musculus OX=10090 GN=Septin9 PE=1 SV=1	0	0	0	0	3	2	1.10389
Q80UU9_K187	Pgrmc2	EK*YDYVGR	PGRC2_MOUSE Membrane-associated progesterone receptor component 2 OS=Mus musculus OX=10090 GN=Pgrmc2 PE=1 SV=2	0	0	0	0	0	1	1.06119
Q80V91_K83	Dtx3	ALK*GLLK	DTX3_MOUSE Probable E3 ubiquitin-protein ligase DTX3 OS=Mus musculus OX=10090 GN=Dtx3 PE=1 SV=2	0	0	0	0	1	0	0.98039
Q80VD1_K179	Fam98b	VK*DILCR	FA98B_MOUSE Protein FAM98B OS=Mus musculus OX=10090 GN=Fam98b PE=1 SV=1	0	0	0	0	0	1	0.97087
Q80W47_K205	Wipi2	LATASEK*GTVIR	WIPI2_MOUSE WD repeat domain phosphoinositide-interacting protein 2 OS=Mus musculus OX=10090 GN=Wipi2 PE=1 SV=1	0	0	0	0	0	1	0.95801
Q80W54_K470	Zmpste24	LQALK*NAK	FACE1_MOUSE CAAX prenyl protease 1 homolog OS=Mus musculus OX=10090 GN=Zmpste24 PE=1 SV=2	0	0	0	1	6	4	0.994555
Q80WQ2_K27	Vac14	K*VAALEIEK	VAC14_MOUSE Protein VAC14 homolog OS=Mus musculus OX=10090 GN=Vac14 PE=1 SV=1	0	0	0	0	2	1	0.827013
Q80XC2_K57	Trmt61a	PFGSK*VICSR	TRM61_MOUSE tRNA (adenine(58)-N(1))-methyltransferase catalytic subunit TRMT61A OS=Mus musculus OX=10090 GN=Trmt61a PE=1 SV=1	0	0	0	0	0	1	0.90909
Q80XU3_K102	Nucks1	AASK*QR	NUCKS_MOUSE Nuclear ubiquitous casein and cyclin-dependent kinase substrate 1 OS=Mus musculus OX=10090 GN=Nucks1 PE=1 SV=1	0	0	0	3	0	0	0.993427
Q80XU3_K175	Nucks1	LK*ATVTPSPVK	NUCKS_MOUSE Nuclear ubiquitous casein and cyclin-dependent kinase substrate 1 OS=Mus musculus OX=10090 GN=Nucks1 PE=1 SV=1	0	0	1	0	0	0	0.86207
Q80XU3_K184	Nucks1	ATVTPSPVK*GK	NUCKS_MOUSE Nuclear ubiquitous casein and cyclin-dependent kinase substrate 1 OS=Mus musculus OX=10090 GN=Nucks1 PE=1 SV=1	0	0	0	0	0	1	1.08696
Q80YN3_K612	Bcas1	GLGPK*R	BCAS1_MOUSE Breast carcinoma-amplified sequence 1 homolog OS=Mus musculus OX=10090 GN=Bcas1 PE=1 SV=3	0	0	0	1	0	2	0.90604
Q80YW0_K23	Cyth4	ELQQIK*WHR	CYH4_MOUSE Cytohesin-4 OS=Mus musculus OX=10090 GN=Cyth4 PE=1 SV=1	0	0	0	0	1	0	1.14943
Q80YW0_K349	Cyth4	VVEGK*HESYR	CYH4_MOUSE Cytohesin-4 OS=Mus musculus OX=10090 GN=Cyth4 PE=1 SV=1	0	0	0	0	5	0	1.08131
Q810B6_K937	Ankfy1	VNELTK*HR	ANFY1_MOUSE Rabankyrin-5 OS=Mus musculus OX=10090 GN=Ankfy1 PE=1 SV=2	0	0	0	0	2	0	0.9021
Q8BFR5_K88	Tufm	ILAEGGGAK*FK	EFTU_MOUSE Elongation factor Tu, mitochondrial OS=Mus musculus OX=10090 GN=Tufm PE=1 SV=1	0	0	0	0	0	4	1.0418
Q8BG05_K118	Hnrnpa3	EDSVK*PGAHLTVK	ROA3_MOUSE Heterogeneous nuclear ribonucleoprotein A3 OS=Mus musculus OX=10090 GN=Hnrnpa3 PE=1 SV=1	0	0	1	0	6	6	1.01431
Q8BG05_K126	Hnrnpa3	EDSVKPGAHLTVK*K	ROA3_MOUSE Heterogeneous nuclear ribonucleoprotein A3 OS=Mus musculus OX=10090 GN=Hnrnpa3 PE=1 SV=1	0	0	0	0	2	0	1.17592
Q8BG05_K134	Hnrnpa3	IFVGGIK*EDTEEYNLR	ROA3_MOUSE Heterogeneous nuclear ribonucleoprotein A3 OS=Mus musculus OX=10090 GN=Hnrnpa3 PE=1 SV=1	0	0	0	0	4	0	1.14701
Q8BG05_K148	Hnrnpa3	DYFEK*YGK	ROA3_MOUSE Heterogeneous nuclear ribonucleoprotein A3 OS=Mus musculus OX=10090 GN=Hnrnpa3 PE=1 SV=1	0	0	0	0	2	0	0.859295
Q8BG05_K199	Hnrnpa3	YHTINGHNCEVK*K	ROA3_MOUSE Heterogeneous nuclear ribonucleoprotein A3 OS=Mus musculus OX=10090 GN=Hnrnpa3 PE=1 SV=1	0	0	0	0	5	0	1.01408
Q8BG32_K32	Psmd11	EASIDILHSIVK*R	PSD11_MOUSE 26S proteasome non-ATPase regulatory subunit 11 OS=Mus musculus OX=10090 GN=Psmd11 PE=1 SV=3	0	0	0	0	1	5	0.929532
Q8BG79_K493	Cwf19l2	LGAK*IIK	C19L2_MOUSE CWF19-like protein 2 OS=Mus musculus OX=10090 GN=Cwf19l2 PE=1 SV=1	0	0	0	0	1	0	1.11111
Q8BG81_K72	Poldip3	LGVK*DAR	PDIP3_MOUSE Polymerase delta-interacting protein 3 OS=Mus musculus OX=10090 GN=Poldip3 PE=1 SV=1	0	0	0	0	0	1	1.2987
Q8BGD9_K337	Eif4b	LNIK*PR	IF4B_MOUSE Eukaryotic translation initiation factor 4B OS=Mus musculus OX=10090 GN=Eif4b PE=1 SV=1	0	0	0	0	0	1	1.11111
Q8BGD9_K453	Eif4b	SLENETLNK*EEDCHSPTSKPPKPDQPLK	IF4B_MOUSE Eukaryotic translation initiation factor 4B OS=Mus musculus OX=10090 GN=Eif4b PE=1 SV=1	0	0	0	0	1	2	1.12719
Q8BGD9_K557	Eif4b	DHWK*DLDR	IF4B_MOUSE Eukaryotic translation initiation factor 4B OS=Mus musculus OX=10090 GN=Eif4b PE=1 SV=1	0	0	0	0	1	0	0.88496
Q8BGQ7_K780	Aars1	SLSAMEAK*VK	SYAC_MOUSE Alanine--tRNA ligase, cytoplasmic OS=Mus musculus OX=10090 GN=Aars1 PE=1 SV=1	0	0	0	0	0	4	1.07558
Q8BH04_K489	Pck2	SESTAAAEHK*GK	PCKGM_MOUSE Phosphoenolpyruvate carboxykinase [GTP], mitochondrial OS=Mus musculus OX=10090 GN=Pck2 PE=1 SV=1	0	0	0	0	1	0	1.19048
Q8BH59_K406	Slc25a12	AIK*LTVNDFVR	CMC1_MOUSE Calcium-binding mitochondrial carrier protein Aralar1 OS=Mus musculus OX=10090 GN=Slc25a12 PE=1 SV=1	0	0	0	1	0	0	0.81967
Q8BH69_K27	Sephs1	FTELK*GTGCK	SPS1_MOUSE Selenide, water dikinase 1 OS=Mus musculus OX=10090 GN=Sephs1 PE=1 SV=1	0	0	0	0	4	2	0.942287
Q8BH79_K58	Ano10	PLLNK*YEK	ANO10_MOUSE Anoctamin-10 OS=Mus musculus OX=10090 GN=Ano10 PE=1 SV=1	0	0	0	0	0	1	0.96154
Q8BHC4_K166	Dcakd	INAQLPLK*DK	DCAKD_MOUSE Dephospho-CoA kinase domain-containing protein OS=Mus musculus OX=10090 GN=Dcakd PE=1 SV=1	0	0	0	0	3	3	0.968865
Q8BHK1_K111	Nipa1	EK*LNILGK	NIPA1_MOUSE Magnesium transporter NIPA1 OS=Mus musculus OX=10090 GN=Nipa1 PE=1 SV=1	0	0	0	0	0	1	1.49254
Q8BHK9_K240	Ercc6l	SASTK*SAVCAR	ERC6L_MOUSE DNA excision repair protein ERCC-6-like OS=Mus musculus OX=10090 GN=Ercc6l PE=1 SV=1	0	0	0	0	1	0	0.74074
Q8BI84_K1267	Mia3	LSSYEQK*IK	TGO1_MOUSE Transport and Golgi organization protein 1 homolog OS=Mus musculus OX=10090 GN=Mia3 PE=1 SV=2	0	0	0	0	2	0	1.14943
Q8BI84_K1512	Mia3	ASMSTK*CNLEDQIK	TGO1_MOUSE Transport and Golgi organization protein 1 homolog OS=Mus musculus OX=10090 GN=Mia3 PE=1 SV=2	0	0	0	0	0	1	1.38889
Q8BIG7_K227	Comtd1	NK*TVECVR	CMTD1_MOUSE Catechol O-methyltransferase domain-containing protein 1 OS=Mus musculus OX=10090 GN=Comtd1 PE=1 SV=1	0	0	1	0	0	2	1.22161
Q8BIS8_K99	Ccdc126	LVK*LESK	CC126_MOUSE Coiled-coil domain-containing protein 126 OS=Mus musculus OX=10090 GN=Ccdc126 PE=2 SV=1	0	0	1	0	4	0	1.03631
Q8BJS4_K358	Sun2	EATLK*EDLR	SUN2_MOUSE SUN domain-containing protein 2 OS=Mus musculus OX=10090 GN=Sun2 PE=1 SV=3	0	0	0	2	0	0	1.12907
Q8BJU0_K201	Sgta	SNLK*IAELK	SGTA_MOUSE Small glutamine-rich tetratricopeptide repeat-containing protein alpha OS=Mus musculus OX=10090 GN=Sgta PE=1 SV=2	0	0	0	0	0	1	0.97087
Q8BJU0_K206	Sgta	IAELK*LR	SGTA_MOUSE Small glutamine-rich tetratricopeptide repeat-containing protein alpha OS=Mus musculus OX=10090 GN=Sgta PE=1 SV=2	0	0	0	0	6	1	1.05158
Q8BJU9_K311	Mtrf1l	IQVGTK*GR	RF1ML_MOUSE Peptide chain release factor 1-like, mitochondrial OS=Mus musculus OX=10090 GN=Mtrf1l PE=2 SV=1	0	0	0	0	1	0	1.26582
Q8BJW6_K563	Eif2a	NQLEK*IQK	EIF2A_MOUSE Eukaryotic translation initiation factor 2A OS=Mus musculus OX=10090 GN=Eif2a PE=1 SV=2	0	0	0	0	1	0	0.69444
Q8BK64_K189	Ahsa1	AK*SAPSK	AHSA1_MOUSE Activator of 90 kDa heat shock protein ATPase homolog 1 OS=Mus musculus OX=10090 GN=Ahsa1 PE=1 SV=2	0	0	6	6	1	1	0.895786
Q8BK64_K198	Ahsa1	SQAK*PVGVK	AHSA1_MOUSE Activator of 90 kDa heat shock protein ATPase homolog 1 OS=Mus musculus OX=10090 GN=Ahsa1 PE=1 SV=2	0	0	0	0	1	0	1
Q8BK64_K203	Ahsa1	PVGVK*IPTCK	AHSA1_MOUSE Activator of 90 kDa heat shock protein ATPase homolog 1 OS=Mus musculus OX=10090 GN=Ahsa1 PE=1 SV=2	0	0	0	0	0	4	0.891415
Q8BK67_K186	Rcc2	GQLGHGDTK*R	RCC2_MOUSE Protein RCC2 OS=Mus musculus OX=10090 GN=Rcc2 PE=1 SV=1	0	0	0	0	3	1	1.00608
Q8BK67_K366	Rcc2	LGHAEQK*DEMVPR	RCC2_MOUSE Protein RCC2 OS=Mus musculus OX=10090 GN=Rcc2 PE=1 SV=1	0	0	0	0	2	0	0.721095
Q8BK67_K75	Rcc2	PATAGK*AAGAAAIITEPEHTK	RCC2_MOUSE Protein RCC2 OS=Mus musculus OX=10090 GN=Rcc2 PE=1 SV=1	0	0	0	0	1	5	0.91007
Q8BK67_K90	Rcc2	AAGAAAIITEPEHTK*ER	RCC2_MOUSE Protein RCC2 OS=Mus musculus OX=10090 GN=Rcc2 PE=1 SV=1	0	0	0	0	0	3	1.09935
Q8BK67_K94	Rcc2	VK*LEGSK	RCC2_MOUSE Protein RCC2 OS=Mus musculus OX=10090 GN=Rcc2 PE=1 SV=1	0	0	0	0	0	1	0.75758
Q8BKS9_K622	Pum3	GGLK*PLIPTLEK	PUM3_MOUSE Pumilio homolog 3 OS=Mus musculus OX=10090 GN=Pum3 PE=1 SV=2	0	0	0	0	4	0	1.16504
Q8BL97_K53	Srsf7	VYVGNLGTGAGK*GELER	SRSF7_MOUSE Serine/arginine-rich splicing factor 7 OS=Mus musculus OX=10090 GN=Srsf7 PE=1 SV=1	0	0	0	0	0	1	1.38889
Q8BL97_K99	Srsf7	GLDGK*VICGSR	SRSF7_MOUSE Serine/arginine-rich splicing factor 7 OS=Mus musculus OX=10090 GN=Srsf7 PE=1 SV=1	0	0	0	0	3	1	1.04866
Q8BLH7_K526	Hirip3	ALK*LQR	HIRP3_MOUSE HIRA-interacting protein 3 OS=Mus musculus OX=10090 GN=Hirip3 PE=1 SV=1	0	0	0	0	0	1	1.14943
Q8BM39_K25	Prpf18	NLLVENK*K	PRP18_MOUSE Pre-mRNA-splicing factor 18 OS=Mus musculus OX=10090 GN=Prpf18 PE=1 SV=1	0	0	0	0	0	1	0.74627
Q8BMF4_K363	Dlat	LAAEK*GIDLTQVK	ODP2_MOUSE Dihydrolipoyllysine-residue acetyltransferase component of pyruvate dehydrogenase complex, mitochondrial OS=Mus musculus OX=10090 GN=Dlat PE=1 SV=2	0	0	0	0	0	3	1.16833
Q8BMJ2_K9	Lars1	GTAK*VDFLK	SYLC_MOUSE Leucine--tRNA ligase, cytoplasmic OS=Mus musculus OX=10090 GN=Lars1 PE=1 SV=2	0	0	0	0	3	2	0.885704
Q8BMK0_K728	Cep85	K*LEEVQQLR	CEP85_MOUSE Centrosomal protein of 85 kDa OS=Mus musculus OX=10090 GN=Cep85 PE=1 SV=2	0	0	0	0	0	1	0.96163
Q8BML9_K366	Qars1	VEELK*GHNPLPSPWR	SYQ_MOUSE Glutamine--tRNA ligase OS=Mus musculus OX=10090 GN=Qars1 PE=1 SV=1	0	0	0	0	2	0	1.02272
Q8BMS1_K411	Hadha	GLNDK*VK	ECHA_MOUSE Trifunctional enzyme subunit alpha, mitochondrial OS=Mus musculus OX=10090 GN=Hadha PE=1 SV=1	0	0	0	0	0	1	0.91743
Q8BMS1_K415	Hadha	K*ALTSFER	ECHA_MOUSE Trifunctional enzyme subunit alpha, mitochondrial OS=Mus musculus OX=10090 GN=Hadha PE=1 SV=1	0	0	0	0	0	1	1.23457
Q8BNV1_K137	Trmt2a	PK*ADPMAR	TRM2A_MOUSE tRNA (uracil-5-)-methyltransferase homolog A OS=Mus musculus OX=10090 GN=Trmt2a PE=1 SV=1	0	0	0	1	0	0	1.16279
Q8BP67_K124	Rpl24	K*TAMAAAK	RL24_MOUSE 60S ribosomal protein L24 OS=Mus musculus OX=10090 GN=Rpl24 PE=1 SV=2	0	0	0	1	0	0	0.9434
Q8BP67_K135	Rpl24	APTK*AAPK	RL24_MOUSE 60S ribosomal protein L24 OS=Mus musculus OX=10090 GN=Rpl24 PE=1 SV=2	0	0	0	6	0	5	0.977695
Q8BP67_K147	Rpl24	IVKPVK*VSAPR	RL24_MOUSE 60S ribosomal protein L24 OS=Mus musculus OX=10090 GN=Rpl24 PE=1 SV=2	0	0	0	2	5	3	0.999201
Q8BP67_K2	Rpl24	MK*VELCSFSGYK	RL24_MOUSE 60S ribosomal protein L24 OS=Mus musculus OX=10090 GN=Rpl24 PE=1 SV=2	2	0	0	0	0	0	0.89875
Q8BP67_K93	Rpl24	AITGASLADIMAK*R	RL24_MOUSE 60S ribosomal protein L24 OS=Mus musculus OX=10090 GN=Rpl24 PE=1 SV=2	0	0	0	1	0	0	1.11111
Q8BPU7_K100	Elmo1	IQSSSMDAK*LEALK	ELMO1_MOUSE Engulfment and cell motility protein 1 OS=Mus musculus OX=10090 GN=Elmo1 PE=1 SV=2	0	0	0	0	2	3	1.17037
Q8BPU7_K503	Elmo1	PSSLDQFK*SK	ELMO1_MOUSE Engulfment and cell motility protein 1 OS=Mus musculus OX=10090 GN=Elmo1 PE=1 SV=2	0	0	0	0	0	2	1.22975
Q8BPU7_K537	Elmo1	PILELK*EK	ELMO1_MOUSE Engulfment and cell motility protein 1 OS=Mus musculus OX=10090 GN=Elmo1 PE=1 SV=2	0	0	0	0	1	1	1.13948
Q8BRF7_K538	Scfd1	NLVLK*QQNLPVTR	SCFD1_MOUSE Sec1 family domain-containing protein 1 OS=Mus musculus OX=10090 GN=Scfd1 PE=1 SV=1	0	0	0	0	2	0	0.85552
Q8BT07_K114	Cep55	K*QQLLESLSK	CEP55_MOUSE Centrosomal protein of 55 kDa OS=Mus musculus OX=10090 GN=Cep55 PE=1 SV=2	0	0	0	0	0	3	0.832673
Q8BT07_K340	Cep55	ILYDSLLK*HQEEQAR	CEP55_MOUSE Centrosomal protein of 55 kDa OS=Mus musculus OX=10090 GN=Cep55 PE=1 SV=2	0	0	0	0	4	0	1.07615
Q8BT07_K7	Cep55	SPK*DLIK	CEP55_MOUSE Centrosomal protein of 55 kDa OS=Mus musculus OX=10090 GN=Cep55 PE=1 SV=2	0	0	0	0	0	1	1.19048
Q8BTI8_K784	Srrm2	QK*SQTPTR	SRRM2_MOUSE Serine/arginine repetitive matrix protein 2 OS=Mus musculus OX=10090 GN=Srrm2 PE=1 SV=3	0	0	1	2	0	0	1.09534
Q8BTM8_K578	Flna	VGTECGNQK*VR	FLNA_MOUSE Filamin-A OS=Mus musculus OX=10090 GN=Flna PE=1 SV=5	0	0	0	0	0	2	0.94415
Q8BTM8_K700	Flna	TGVAVNKPAEFTVDAK*HAGK	FLNA_MOUSE Filamin-A OS=Mus musculus OX=10090 GN=Flna PE=1 SV=5	0	0	0	0	2	0	1.16421
Q8BTM8_K771	Flna	VNVGAGSHPNK*VK	FLNA_MOUSE Filamin-A OS=Mus musculus OX=10090 GN=Flna PE=1 SV=5	0	0	0	0	1	0	1.0101
Q8BVU5_K186	Nudt9	DESGNK*ITHPVSGK	NUDT9_MOUSE ADP-ribose pyrophosphatase, mitochondrial OS=Mus musculus OX=10090 GN=Nudt9 PE=1 SV=1	0	0	0	0	0	1	1.03093
Q8BVU5_K228	Nudt9	ISATLK*R	NUDT9_MOUSE ADP-ribose pyrophosphatase, mitochondrial OS=Mus musculus OX=10090 GN=Nudt9 PE=1 SV=1	0	0	0	0	0	3	0.889163
Q8BVY0_K144	Rsl1d1	AYEAK*LR	RL1D1_MOUSE Ribosomal L1 domain-containing protein 1 OS=Mus musculus OX=10090 GN=Rsl1d1 PE=1 SV=1	0	0	0	1	2	1	1.22583
Q8BWW4_K504	Larp4	MSDVVK*GVCR	LARP4_MOUSE La-related protein 4 OS=Mus musculus OX=10090 GN=Larp4 PE=1 SV=2	0	0	0	0	0	1	0.75758
Q8BWY3_K22	Etf1	LIK*SLEAAR	ERF1_MOUSE Eukaryotic peptide chain release factor subunit 1 OS=Mus musculus OX=10090 GN=Etf1 PE=1 SV=4	0	0	0	0	0	1	1.42857
Q8BWY3_K342	Etf1	YVLHCQGTEEEK*ILYLTPEQEK	ERF1_MOUSE Eukaryotic peptide chain release factor subunit 1 OS=Mus musculus OX=10090 GN=Etf1 PE=1 SV=4	0	0	0	0	1	0	0.96154
Q8BXV2_K225	Bri3bp	GSPGGLCSPSVEEK*LEHLENQVR	BRI3B_MOUSE BRI3-binding protein OS=Mus musculus OX=10090 GN=Bri3bp PE=1 SV=1	0	0	0	0	2	1	1.17427
Q8BY71_K12	Hat1	FLVEYK*SAVEK	HAT1_MOUSE Histone acetyltransferase type B catalytic subunit OS=Mus musculus OX=10090 GN=Hat1 PE=1 SV=1	0	0	0	0	1	0	1.03093
Q8BYC6_K398	Taok3	K*DHVFVR	TAOK3_MOUSE Serine/threonine-protein kinase TAO3 OS=Mus musculus OX=10090 GN=Taok3 PE=1 SV=2	0	0	0	0	1	0	1.04167
Q8BYY4_K201	Ttc39b	GGLK*IR	TT39B_MOUSE Tetratricopeptide repeat protein 39B OS=Mus musculus OX=10090 GN=Ttc39b PE=1 SV=1	0	0	0	1	1	1	1.0527
Q8BYY4_K44	Ttc39b	SPSDMATSGFHFVPCETK*R	TT39B_MOUSE Tetratricopeptide repeat protein 39B OS=Mus musculus OX=10090 GN=Ttc39b PE=1 SV=1	0	0	0	0	0	1	1.0101
Q8BYY4_K443	Ttc39b	IAGK*SLPTEK	TT39B_MOUSE Tetratricopeptide repeat protein 39B OS=Mus musculus OX=10090 GN=Ttc39b PE=1 SV=1	0	0	0	1	0	4	1.14316
Q8BZ32_K44	Asxl2	EGLK*EIR	ASXL2_MOUSE Putative Polycomb group protein ASXL2 OS=Mus musculus OX=10090 GN=Asxl2 PE=1 SV=1	4	0	0	0	0	0	1.04994
Q8BZP8_K267	Npsr1	GLISK*AK	NPSR1_MOUSE Neuropeptide S receptor OS=Mus musculus OX=10090 GN=Npsr1 PE=2 SV=1	0	0	0	0	0	2	0.90609
Q8C0L8_K688	Cog5	PLGEGGK*LR	COG5_MOUSE Conserved oligomeric Golgi complex subunit 5 OS=Mus musculus OX=10090 GN=Cog5 PE=1 SV=3	0	0	0	0	1	0	1.13636
Q8C1B7_K190	Septin11	ADTIAK*NELHK	SEP11_MOUSE Septin-11 OS=Mus musculus OX=10090 GN=Septin11 PE=1 SV=4	0	0	0	0	1	0	1.17647
Q8C1B7_K366	Septin11	ELHEK*FDLLK	SEP11_MOUSE Septin-11 OS=Mus musculus OX=10090 GN=Septin11 PE=1 SV=4	0	0	0	0	3	2	0.942726
Q8C2Q3_K135	Rbm14	AAIAQLNGK*EVK	RBM14_MOUSE RNA-binding protein 14 OS=Mus musculus OX=10090 GN=Rbm14 PE=1 SV=1	0	0	0	0	0	1	1.14943
Q8C2Q3_K149	Rbm14	INVELSTK*GQK	RBM14_MOUSE RNA-binding protein 14 OS=Mus musculus OX=10090 GN=Rbm14 PE=1 SV=1	0	0	0	0	1	1	0.9812
Q8C3Q9_K182	Casp9	PVDIGSGGAHDVCVPGK*IR	CASP9_MOUSE Caspase-9 OS=Mus musculus OX=10090 GN=Casp9 PE=1 SV=1	0	0	0	0	0	2	1.21217
Q8C854_K512	Myef2	LGSK*GNQIFVR	MYEF2_MOUSE Myelin expression factor 2 OS=Mus musculus OX=10090 GN=Myef2 PE=1 SV=1	0	0	0	0	5	4	1.00699
Q8C9W3_K1209	Adamts2	KEK*PGK	ATS2_MOUSE A disintegrin and metalloproteinase with thrombospondin motifs 2 OS=Mus musculus OX=10090 GN=Adamts2 PE=1 SV=2	0	0	0	0	0	1	1.07527
Q8CAQ8_K450	Immt	TFDSAVAK*ALEHHR	MIC60_MOUSE MICOS complex subunit Mic60 OS=Mus musculus OX=10090 GN=Immt PE=1 SV=1	0	0	0	0	0	1	0.95238
Q8CCP0_K1002	Nemf	VK*LTPGVQK	NEMF_MOUSE Nuclear export mediator factor Nemf OS=Mus musculus OX=10090 GN=Nemf PE=1 SV=2	0	0	1	1	2	3	1.20911
Q8CDM1_K625	Atad2	PLTAEEVK*R	ATAD2_MOUSE ATPase family AAA domain-containing protein 2 OS=Mus musculus OX=10090 GN=Atad2 PE=1 SV=1	0	0	0	0	1	1	1.03927
Q8CEC0_K598	Nup88	VK*LLCDQK	NUP88_MOUSE Nuclear pore complex protein Nup88 OS=Mus musculus OX=10090 GN=Nup88 PE=1 SV=1	0	0	0	0	1	0	0.6993
Q8CFE2_K191	Hpf1	NIDEK*LTEAAR	HPF1_MOUSE Histone PARylation factor 1 OS=Mus musculus OX=10090 GN=Hpf1 PE=1 SV=1	0	0	0	0	2	0	1.04257
Q8CG47_K1007	Smc4	VIQENEHALQK*DALSIK	SMC4_MOUSE Structural maintenance of chromosomes protein 4 OS=Mus musculus OX=10090 GN=Smc4 PE=1 SV=1	0	0	0	0	1	0	1
Q8CG47_K266	Smc4	LNEPIK*VLCR	SMC4_MOUSE Structural maintenance of chromosomes protein 4 OS=Mus musculus OX=10090 GN=Smc4 PE=1 SV=1	0	0	0	0	0	1	0.97675
Q8CG47_K282	Smc4	GEK*LNR	SMC4_MOUSE Structural maintenance of chromosomes protein 4 OS=Mus musculus OX=10090 GN=Smc4 PE=1 SV=1	0	0	0	0	1	0	1.31579
Q8CG48_K804	Smc2	TK*ADASSK	SMC2_MOUSE Structural maintenance of chromosomes protein 2 OS=Mus musculus OX=10090 GN=Smc2 PE=1 SV=2	0	0	2	2	1	2	0.761661
Q8CG48_K963	Smc2	TNNPK*EAGQR	SMC2_MOUSE Structural maintenance of chromosomes protein 2 OS=Mus musculus OX=10090 GN=Smc2 PE=1 SV=2	0	0	0	2	0	1	1.09102
Q8CG48_K971	Smc2	LQK*LQEVK	SMC2_MOUSE Structural maintenance of chromosomes protein 2 OS=Mus musculus OX=10090 GN=Smc2 PE=1 SV=2	0	0	0	0	0	3	0.873247
Q8CGC7_K794	Eprs1	EK*TGQEYKPGNPSAAAVQTVSTK	SYEP_MOUSE Bifunctional glutamate/proline--tRNA ligase OS=Mus musculus OX=10090 GN=Eprs1 PE=1 SV=4	0	0	1	0	0	0	1.14943
Q8CGF7_K848	Tcerg1	QYIEK*IAK	TCRG1_MOUSE Transcription elongation regulator 1 OS=Mus musculus OX=10090 GN=Tcerg1 PE=1 SV=2	0	0	0	0	1	0	1.1236
Q8CGK3_K357	Lonp1	K*EFELSK	LONM_MOUSE Lon protease homolog, mitochondrial OS=Mus musculus OX=10090 GN=Lonp1 PE=1 SV=2	0	0	0	3	4	3	0.878911
Q8CGK3_K375	Lonp1	EVEEK*IK	LONM_MOUSE Lon protease homolog, mitochondrial OS=Mus musculus OX=10090 GN=Lonp1 PE=1 SV=2	0	0	0	0	2	0	1.04868
Q8CGP0_K6	H2bu1	PDPSK*SAPAPK	H2B3B_MOUSE Histone H2B type 3-B OS=Mus musculus OX=10090 GN=H2bu1 PE=1 SV=3	0	2	0	0	2	0	1.11791
Q8CGP6_K37	H2ac12	K*GNYSER	H2A1H_MOUSE Histone H2A type 1-H OS=Mus musculus OX=10090 GN=H2ac12 PE=1 SV=3	0	1	6	6	1	3	1.04581
Q8CH02_K190	Sugp1	VIEK*LAR	SUGP1_MOUSE SURP and G-patch domain-containing protein 1 OS=Mus musculus OX=10090 GN=Sugp1 PE=1 SV=1	0	0	0	0	0	1	1
Q8CH02_K265	Sugp1	NLAEK*LAR	SUGP1_MOUSE SURP and G-patch domain-containing protein 1 OS=Mus musculus OX=10090 GN=Sugp1 PE=1 SV=1	0	0	0	0	1	2	0.95082
Q8CH18_K143	Ccar1	SSQQQTQPQK*QR	CCAR1_MOUSE Cell division cycle and apoptosis regulator protein 1 OS=Mus musculus OX=10090 GN=Ccar1 PE=1 SV=1	0	0	2	0	0	0	0.81189
Q8CH25_K625	Sltm	LK*QAVEFR	SLTM_MOUSE SAFB-like transcription modulator OS=Mus musculus OX=10090 GN=Sltm PE=1 SV=1	0	0	0	0	0	1	1.23457
Q8CH77_K555	Nav1	LK*VAGK	NAV1_MOUSE Neuron navigator 1 OS=Mus musculus OX=10090 GN=Nav1 PE=1 SV=2	0	0	0	0	0	1	1.31579
Q8CHK3_K24	Mboat7	K*AGPGLK	MBOA7_MOUSE Lysophospholipid acyltransferase 7 OS=Mus musculus OX=10090 GN=Mboat7 PE=1 SV=1	0	0	1	0	0	0	1.02041
Q8CI11_K232	Gnl3	ICCGK*EALWK	GNL3_MOUSE Guanine nucleotide-binding protein-like 3 OS=Mus musculus OX=10090 GN=Gnl3 PE=1 SV=2	0	0	0	0	1	0	1.25
Q8CIE6_K446	Copa	NEITK*K	COPA_MOUSE Coatomer subunit alpha OS=Mus musculus OX=10090 GN=Copa PE=1 SV=2	0	0	0	1	1	0	1.02222
Q8CIN4_K246	Pak2	TIVSIGDPK*K	PAK2_MOUSE Serine/threonine-protein kinase PAK 2 OS=Mus musculus OX=10090 GN=Pak2 PE=1 SV=1	0	0	0	4	4	5	1.10368
Q8CIN4_K247	Pak2	TIVSIGDPKK*K	PAK2_MOUSE Serine/threonine-protein kinase PAK 2 OS=Mus musculus OX=10090 GN=Pak2 PE=1 SV=1	0	0	0	0	1	2	1.0652
Q8JZM7_K161	Cdc73	LEGHK*EGIVQTEQIR	CDC73_MOUSE Parafibromin OS=Mus musculus OX=10090 GN=Cdc73 PE=1 SV=1	0	0	0	0	1	0	0.96154
Q8JZQ9_K202	Eif3b	IFSK*FGK	EIF3B_MOUSE Eukaryotic translation initiation factor 3 subunit B OS=Mus musculus OX=10090 GN=Eif3b PE=1 SV=1	0	0	0	0	2	0	1.01175
Q8JZQ9_K246	Eif3b	LDK*QHTFR	EIF3B_MOUSE Eukaryotic translation initiation factor 3 subunit B OS=Mus musculus OX=10090 GN=Eif3b PE=1 SV=1	0	0	0	0	2	1	1.01091
Q8JZQ9_K682	Eif3b	LLQK*NNK	EIF3B_MOUSE Eukaryotic translation initiation factor 3 subunit B OS=Mus musculus OX=10090 GN=Eif3b PE=1 SV=1	0	0	0	1	0	2	1.13562
Q8JZQ9_K723	Eif3b	IFEQK*DR	EIF3B_MOUSE Eukaryotic translation initiation factor 3 subunit B OS=Mus musculus OX=10090 GN=Eif3b PE=1 SV=1	0	0	0	0	2	2	0.886852
Q8JZQ9_K730	Eif3b	LSQSK*ASK	EIF3B_MOUSE Eukaryotic translation initiation factor 3 subunit B OS=Mus musculus OX=10090 GN=Eif3b PE=1 SV=1	0	0	0	5	4	1	1.19022
Q8JZQ9_K733	Eif3b	ASK*ELVER	EIF3B_MOUSE Eukaryotic translation initiation factor 3 subunit B OS=Mus musculus OX=10090 GN=Eif3b PE=1 SV=1	0	0	0	2	0	4	1.31985
Q8JZR0_K361	Acsl5	VYDK*VQNEAK	ACSL5_MOUSE Long-chain-fatty-acid--CoA ligase 5 OS=Mus musculus OX=10090 GN=Acsl5 PE=1 SV=1	0	0	3	3	4	4	1.08652
Q8JZU2_K268	Slc25a1	ILK*NEGPK	TXTP_MOUSE Tricarboxylate transport protein, mitochondrial OS=Mus musculus OX=10090 GN=Slc25a1 PE=1 SV=1	0	0	0	0	0	1	1.28017
Q8K019_K710	Bclaf1	GDSK*GSR	BCLF1_MOUSE Bcl-2-associated transcription factor 1 OS=Mus musculus OX=10090 GN=Bclaf1 PE=1 SV=2	0	0	0	1	0	0	1.19048
Q8K0D5_K468	Gfm1	FSK*GIGR	EFGM_MOUSE Elongation factor G, mitochondrial OS=Mus musculus OX=10090 GN=Gfm1 PE=1 SV=1	0	0	0	0	0	3	1.01359
Q8K124_K318	Plekho2	ILSEK*MK	PKHO2_MOUSE Pleckstrin homology domain-containing family O member 2 OS=Mus musculus OX=10090 GN=Plekho2 PE=1 SV=1	0	0	0	0	4	0	1.04235
Q8K1B8_K222	Fermt3	PSSLPDK*TQLHSR	URP2_MOUSE Fermitin family homolog 3 OS=Mus musculus OX=10090 GN=Fermt3 PE=1 SV=1	0	0	0	0	0	2	1.08848
Q8K1N4_K336	Spats2	ADIK*HFVSER	SPAS2_MOUSE Spermatogenesis-associated serine-rich protein 2 OS=Mus musculus OX=10090 GN=Spats2 PE=1 SV=1	0	0	0	0	1	0	0.83333
Q8K1R3_K456	Pnpt1	ELGHGALAEK*ALCPVIPK	PNPT1_MOUSE Polyribonucleotide nucleotidyltransferase 1, mitochondrial OS=Mus musculus OX=10090 GN=Pnpt1 PE=1 SV=1	0	0	0	0	1	3	1.08919
Q8K1R3_K616	Pnpt1	VPLSK*R	PNPT1_MOUSE Polyribonucleotide nucleotidyltransferase 1, mitochondrial OS=Mus musculus OX=10090 GN=Pnpt1 PE=1 SV=1	0	0	0	1	0	2	0.989353
Q8K221_K284	Arfip2	LK*FLEENK	ARFP2_MOUSE Arfaptin-2 OS=Mus musculus OX=10090 GN=Arfip2 PE=1 SV=2	0	0	0	0	0	2	0.915555
Q8K298_K366	Anln	GIK*PFLER	ANLN_MOUSE Anillin OS=Mus musculus OX=10090 GN=Anln PE=1 SV=2	0	0	0	0	0	1	0.71942
Q8K2B3_K250	Sdha	AK*NTVIATGGYGR	SDHA_MOUSE Succinate dehydrogenase [ubiquinone] flavoprotein subunit, mitochondrial OS=Mus musculus OX=10090 GN=Sdha PE=1 SV=1	0	0	1	0	0	2	1.06063
Q8K2B3_K547	Sdha	ISQLYGDLK*HLK	SDHA_MOUSE Succinate dehydrogenase [ubiquinone] flavoprotein subunit, mitochondrial OS=Mus musculus OX=10090 GN=Sdha PE=1 SV=1	0	0	0	0	5	0	1.01092
Q8K2P7_K60	Slc38a1	SLTNSHLEK*R	S38A1_MOUSE Sodium-coupled neutral amino acid transporter 1 OS=Mus musculus OX=10090 GN=Slc38a1 PE=1 SV=1	0	0	0	0	2	3	0.91006
Q8K2Z4_K215	Ncapd2	LLENPTISHQK*NR	CND1_MOUSE Condensin complex subunit 1 OS=Mus musculus OX=10090 GN=Ncapd2 PE=1 SV=2	0	0	0	0	0	1	0.89286
Q8K310_K268	Matr3	SLFEK*K	MATR3_MOUSE Matrin-3 OS=Mus musculus OX=10090 GN=Matr3 PE=1 SV=1	0	0	0	0	5	0	0.882306
Q8K310_K491	Matr3	FDQK*QELGR	MATR3_MOUSE Matrin-3 OS=Mus musculus OX=10090 GN=Matr3 PE=1 SV=1	0	0	1	0	0	5	1.08299
Q8K310_K565	Matr3	CVK*VDLSEK	MATR3_MOUSE Matrin-3 OS=Mus musculus OX=10090 GN=Matr3 PE=1 SV=1	0	0	0	0	0	1	0.97087
Q8K310_K588	Matr3	GIDLLK*K	MATR3_MOUSE Matrin-3 OS=Mus musculus OX=10090 GN=Matr3 PE=1 SV=1	0	0	0	3	4	3	0.956679
Q8K310_K835	Matr3	FLNK*LAEER	MATR3_MOUSE Matrin-3 OS=Mus musculus OX=10090 GN=Matr3 PE=1 SV=1	0	0	0	0	0	1	0.71942
Q8K363_K532	Ddx18	YLK*QSK	DDX18_MOUSE ATP-dependent RNA helicase DDX18 OS=Mus musculus OX=10090 GN=Ddx18 PE=1 SV=1	0	0	0	0	1	0	0.84034
Q8K3X4_K373	Irf2bpl	K*DHSLLGR	I2BPL_MOUSE Probable E3 ubiquitin-protein ligase IRF2BPL OS=Mus musculus OX=10090 GN=Irf2bpl PE=1 SV=1	0	0	0	0	4	3	1.063
Q8K4B2_K392	Irak3	VVLDDPK*HVQLR	IRAK3_MOUSE Interleukin-1 receptor-associated kinase 3 OS=Mus musculus OX=10090 GN=Irak3 PE=1 SV=2	0	0	0	0	3	0	1.0367
Q8K4I3_K753	Arhgef6	LLK*QTDECIR	ARHG6_MOUSE Rho guanine nucleotide exchange factor 6 OS=Mus musculus OX=10090 GN=Arhgef6 PE=1 SV=1	0	0	0	0	0	1	1.07527
Q8K4L0_K124	Ddx54	K*TIPVILDGK	DDX54_MOUSE ATP-dependent RNA helicase DDX54 OS=Mus musculus OX=10090 GN=Ddx54 PE=1 SV=1	0	0	0	0	0	1	0.88496
Q8K4L3_K1573	Svil	K*IAFQLAK	SVIL_MOUSE Supervillin OS=Mus musculus OX=10090 GN=Svil PE=1 SV=1	0	0	0	0	0	2	1.05847
Q8K4Z5_K55	Sf3a1	NIVDK*TASFVAR	SF3A1_MOUSE Splicing factor 3A subunit 1 OS=Mus musculus OX=10090 GN=Sf3a1 PE=1 SV=1	0	0	0	0	2	0	1.11166
Q8QZT1_K171	Acat1	GATPYGGVK*LEDLIVK	THIL_MOUSE Acetyl-CoA acetyltransferase, mitochondrial OS=Mus musculus OX=10090 GN=Acat1 PE=1 SV=1	0	0	0	0	2	1	0.958363
Q8QZT1_K260	Acat1	VDFSK*VPK	THIL_MOUSE Acetyl-CoA acetyltransferase, mitochondrial OS=Mus musculus OX=10090 GN=Acat1 PE=1 SV=1	0	0	0	0	0	4	0.978007
Q8QZY1_K301	Eif3l	VLENIELNK*K	EIF3L_MOUSE Eukaryotic translation initiation factor 3 subunit L OS=Mus musculus OX=10090 GN=Eif3l PE=1 SV=1	0	0	0	0	0	3	1.034
Q8QZY1_K397	Eif3l	YGDK*MLR	EIF3L_MOUSE Eukaryotic translation initiation factor 3 subunit L OS=Mus musculus OX=10090 GN=Eif3l PE=1 SV=1	0	0	0	3	6	4	0.990081
Q8QZY1_K549	Eif3l	QIHK*FEELNR	EIF3L_MOUSE Eukaryotic translation initiation factor 3 subunit L OS=Mus musculus OX=10090 GN=Eif3l PE=1 SV=1	0	0	0	0	1	1	1.03941
Q8R001_K193	Mapre2	K*SHHANSPTAGAAK	MARE2_MOUSE Microtubule-associated protein RP/EB family member 2 OS=Mus musculus OX=10090 GN=Mapre2 PE=1 SV=1	0	0	1	0	0	0	0.90909
Q8R010_K70	Aimp2	LYELK*AAVDGLSK	AIMP2_MOUSE Aminoacyl tRNA synthase complex-interacting multifunctional protein 2 OS=Mus musculus OX=10090 GN=Aimp2 PE=1 SV=2	0	0	3	4	5	4	1.15204
Q8R016_K68	Blmh	PVTNQK*SSGR	BLMH_MOUSE Bleomycin hydrolase OS=Mus musculus OX=10090 GN=Blmh PE=1 SV=1	0	0	0	0	0	1	1.06383
Q8R035_K66	Mrpl58	VPEHAK*QASSYIPLDR	ICT1_MOUSE Peptidyl-tRNA hydrolase ICT1, mitochondrial OS=Mus musculus OX=10090 GN=Mrpl58 PE=1 SV=1	0	0	0	0	2	1	1.09942
Q8R035_K98	Mrpl58	VNSK*AEVR	ICT1_MOUSE Peptidyl-tRNA hydrolase ICT1, mitochondrial OS=Mus musculus OX=10090 GN=Mrpl58 PE=1 SV=1	0	0	0	0	0	1	1.47059
Q8R050_K275	Gspt1	GK*TVEVGR	ERF3A_MOUSE Eukaryotic peptide chain release factor GTP-binding subunit ERF3A OS=Mus musculus OX=10090 GN=Gspt1 PE=1 SV=2	0	0	1	1	0	0	1.0545
Q8R050_K384	Gspt1	K*VGFNPK	ERF3A_MOUSE Eukaryotic peptide chain release factor GTP-binding subunit ERF3A OS=Mus musculus OX=10090 GN=Gspt1 PE=1 SV=2	0	0	0	1	2	1	1.29059
Q8R081_K266	Hnrnpl	IEYAK*PTR	HNRPL_MOUSE Heterogeneous nuclear ribonucleoprotein L OS=Mus musculus OX=10090 GN=Hnrnpl PE=1 SV=2	0	0	0	0	0	2	1.12716
Q8R081_K490	Hnrnpl	FSTPEQAAK*NR	HNRPL_MOUSE Heterogeneous nuclear ribonucleoprotein L OS=Mus musculus OX=10090 GN=Hnrnpl PE=1 SV=2	0	0	0	0	0	6	1.04964
Q8R081_K94	Hnrnpl	TENAGDQHGGGGGGGSGAAGGGGGENYDDPHK*TPASPVVHIR	HNRPL_MOUSE Heterogeneous nuclear ribonucleoprotein L OS=Mus musculus OX=10090 GN=Hnrnpl PE=1 SV=2	0	0	0	0	1	0	1.16279
Q8R1B4_K330	Eif3c	K*LNEILQVR	EIF3C_MOUSE Eukaryotic translation initiation factor 3 subunit C OS=Mus musculus OX=10090 GN=Eif3c PE=1 SV=1	0	0	2	0	0	2	0.982082
Q8R1B4_K556	Eif3c	YIYAK*DR	EIF3C_MOUSE Eukaryotic translation initiation factor 3 subunit C OS=Mus musculus OX=10090 GN=Eif3c PE=1 SV=1	0	0	0	0	2	1	0.956487
Q8R1B4_K99	Eif3c	SIVDK*EGVPR	EIF3C_MOUSE Eukaryotic translation initiation factor 3 subunit C OS=Mus musculus OX=10090 GN=Eif3c PE=1 SV=1	0	0	0	0	3	0	1.09233
Q8R1F1_K20	Niban2	QHIAEK*TEK	NIBA2_MOUSE Protein Niban 2 OS=Mus musculus OX=10090 GN=Niban2 PE=1 SV=2	0	0	0	0	2	2	1.21073
Q8R1F1_K23	Niban2	QHIAEKTEK*	NIBA2_MOUSE Protein Niban 2 OS=Mus musculus OX=10090 GN=Niban2 PE=1 SV=2	0	0	0	0	1	1	0.733235
Q8R1F1_K330	Niban2	AFILPK*AEVCVR	NIBA2_MOUSE Protein Niban 2 OS=Mus musculus OX=10090 GN=Niban2 PE=1 SV=2	0	0	0	0	0	1	0.9901
Q8R1F1_K462	Niban2	GPTK*EELCK	NIBA2_MOUSE Protein Niban 2 OS=Mus musculus OX=10090 GN=Niban2 PE=1 SV=2	0	0	0	0	1	2	0.975773
Q8R1F1_K507	Niban2	K*LAPTCK	NIBA2_MOUSE Protein Niban 2 OS=Mus musculus OX=10090 GN=Niban2 PE=1 SV=2	0	0	0	0	1	1	0.98086
Q8R1K4_K8	Phykpl	K*AVTLDLR	AT2L2_MOUSE 5-phosphohydroxy-L-lysine phospho-lyase OS=Mus musculus OX=10090 GN=Phykpl PE=1 SV=1	0	0	0	1	0	0	0.95238
Q8R2M2_K617	Dnttip2	AVITPDFEK*K	TDIF2_MOUSE Deoxynucleotidyltransferase terminal-interacting protein 2 OS=Mus musculus OX=10090 GN=Dnttip2 PE=1 SV=1	0	0	0	0	0	2	0.913595
Q8R2R6_K171	Mtg1	TGK*AAR	MTG1_MOUSE Mitochondrial ribosome-associated GTPase 1 OS=Mus musculus OX=10090 GN=Mtg1 PE=1 SV=2	0	0	0	1	0	0	0.81967
Q8R2U2_K323	Nepro	LGNK*ATQETNR	NEPRO_MOUSE Nucleolus and neural progenitor protein OS=Mus musculus OX=10090 GN=Nepro PE=2 SV=1	0	0	1	0	3	0	1.00619
Q8R326_K256	Pspc1	TQQYHK*ER	PSPC1_MOUSE Paraspeckle component 1 OS=Mus musculus OX=10090 GN=Pspc1 PE=1 SV=1	0	0	0	0	3	0	1.03325
Q8R3C0_K204	Mcmbp	QAGGLGGLHWCGEPK*R	MCMBP_MOUSE Mini-chromosome maintenance complex-binding protein OS=Mus musculus OX=10090 GN=Mcmbp PE=1 SV=1	0	0	0	0	3	0	0.93666
Q8R3C0_K328	Mcmbp	LQHINPLLPTCLNK*EESR	MCMBP_MOUSE Mini-chromosome maintenance complex-binding protein OS=Mus musculus OX=10090 GN=Mcmbp PE=1 SV=1	0	0	0	0	1	3	1.21372
Q8R3C0_K621	Mcmbp	AK*QLELSR	MCMBP_MOUSE Mini-chromosome maintenance complex-binding protein OS=Mus musculus OX=10090 GN=Mcmbp PE=1 SV=1	0	0	0	0	0	3	0.966763
Q8R3Y8_K248	Irf2bp1	K*DHGLVGR	I2BP1_MOUSE Interferon regulatory factor 2-binding protein 1 OS=Mus musculus OX=10090 GN=Irf2bp1 PE=1 SV=2	0	0	0	0	1	2	0.953003
Q8R422_K808	Cd109	K*TVQVPR	CD109_MOUSE CD109 antigen OS=Mus musculus OX=10090 GN=Cd109 PE=1 SV=1	0	0	0	0	1	0	0.92593
Q8R5A0_K127	Smyd2	TPSEK*LLAVR	SMYD2_MOUSE N-lysine methyltransferase SMYD2 OS=Mus musculus OX=10090 GN=Smyd2 PE=1 SV=1	0	0	0	0	1	0	1.02041
Q8R5A3_K172	Apbb1ip	LALEK*LK	AB1IP_MOUSE Amyloid beta A4 precursor protein-binding family B member 1-interacting protein OS=Mus musculus OX=10090 GN=Apbb1ip PE=1 SV=2	0	0	0	0	0	1	0.68966
Q8R5H1_K363	Usp15	AFK*TQVGR	UBP15_MOUSE Ubiquitin carboxyl-terminal hydrolase 15 OS=Mus musculus OX=10090 GN=Usp15 PE=1 SV=1	0	0	0	0	0	2	1.05556
Q8UN02_K119	gag	IAHNQSVDVK*K	GGAG_MLVMN Glyco-Gag protein OS=Moloney murine leukemia virus (strain neuropathogenic variant ts1-92b) OX=882209 GN=gag PE=3 SV=2	0	0	0	0	0	1	0.91743
Q8UN02_K504	gag	LEDLK*NK	GGAG_MLVMN Glyco-Gag protein OS=Moloney murine leukemia virus (strain neuropathogenic variant ts1-92b) OX=882209 GN=gag PE=3 SV=2	0	0	0	0	0	1	1.07527
Q8VBT9_K356	Aspscr1	LAQLK*SER	ASPC1_MOUSE Tether containing UBX domain for GLUT4 OS=Mus musculus OX=10090 GN=Aspscr1 PE=1 SV=1	0	0	0	0	1	0	0.9434
Q8VCD5_K621	Med17	GPFK*EVQWNK	MED17_MOUSE Mediator of RNA polymerase II transcription subunit 17 OS=Mus musculus OX=10090 GN=Med17 PE=1 SV=1	0	0	1	0	2	0	1.45599
Q8VCH8_K268	Ubxn4	IK*QQIALDR	UBXN4_MOUSE UBX domain-containing protein 4 OS=Mus musculus OX=10090 GN=Ubxn4 PE=1 SV=1	0	0	0	0	0	3	1.05399
Q8VDD5_K102	Myh9	VEDMAELTCLNEASVLHNLK*ER	MYH9_MOUSE Myosin-9 OS=Mus musculus OX=10090 GN=Myh9 PE=1 SV=4	0	0	0	0	1	0	1.42857
Q8VDD5_K1024	Myh9	NK*HEAMITDLEER	MYH9_MOUSE Myosin-9 OS=Mus musculus OX=10090 GN=Myh9 PE=1 SV=4	0	0	0	0	2	0	1.06349
Q8VDD5_K1048	Myh9	QELEK*TR	MYH9_MOUSE Myosin-9 OS=Mus musculus OX=10090 GN=Myh9 PE=1 SV=4	0	0	0	0	1	0	0.97087
Q8VDD5_K1104	Myh9	NMALK*K	MYH9_MOUSE Myosin-9 OS=Mus musculus OX=10090 GN=Myh9 PE=1 SV=4	0	0	0	0	3	0	0.88548
Q8VDD5_K1212	Myh9	VK*ATLEK	MYH9_MOUSE Myosin-9 OS=Mus musculus OX=10090 GN=Myh9 PE=1 SV=4	0	0	2	6	3	6	0.9952
Q8VDD5_K1217	Myh9	ATLEK*AK	MYH9_MOUSE Myosin-9 OS=Mus musculus OX=10090 GN=Myh9 PE=1 SV=4	0	0	0	3	0	0	1.08578
Q8VDD5_K1219	Myh9	AK*QTLENER	MYH9_MOUSE Myosin-9 OS=Mus musculus OX=10090 GN=Myh9 PE=1 SV=4	0	0	2	6	3	3	0.952787
Q8VDD5_K1234	Myh9	GELANEVK*ALLQGK	MYH9_MOUSE Myosin-9 OS=Mus musculus OX=10090 GN=Myh9 PE=1 SV=4	0	0	0	1	0	0	1.05263
Q8VDD5_K1240	Myh9	ALLQGK*GDSEHK	MYH9_MOUSE Myosin-9 OS=Mus musculus OX=10090 GN=Myh9 PE=1 SV=4	0	0	0	0	3	2	1.01042
Q8VDD5_K1246	Myh9	GDSEHK*R	MYH9_MOUSE Myosin-9 OS=Mus musculus OX=10090 GN=Myh9 PE=1 SV=4	0	0	0	0	2	0	1.07539
Q8VDD5_K1249	Myh9	K*VEAQLQELQVK	MYH9_MOUSE Myosin-9 OS=Mus musculus OX=10090 GN=Myh9 PE=1 SV=4	0	0	4	4	3	6	1.00821
Q8VDD5_K1274	Myh9	TELADK*VTK	MYH9_MOUSE Myosin-9 OS=Mus musculus OX=10090 GN=Myh9 PE=1 SV=4	0	0	0	0	0	3	0.98664
Q8VDD5_K1392	Myh9	LQK*DLEGLSQR	MYH9_MOUSE Myosin-9 OS=Mus musculus OX=10090 GN=Myh9 PE=1 SV=4	0	0	1	1	0	5	0.98829
Q8VDD5_K1404	Myh9	LEEK*VAAYDK	MYH9_MOUSE Myosin-9 OS=Mus musculus OX=10090 GN=Myh9 PE=1 SV=4	0	0	6	3	4	4	1.01818
Q8VDD5_K1410	Myh9	VAAYDK*LEK	MYH9_MOUSE Myosin-9 OS=Mus musculus OX=10090 GN=Myh9 PE=1 SV=4	0	0	0	0	1	0	1.02041
Q8VDD5_K1445	Myh9	K*FDQLLAEEK	MYH9_MOUSE Myosin-9 OS=Mus musculus OX=10090 GN=Myh9 PE=1 SV=4	0	0	2	0	0	1	0.908017
Q8VDD5_K1459	Myh9	TISAK*YAEER	MYH9_MOUSE Myosin-9 OS=Mus musculus OX=10090 GN=Myh9 PE=1 SV=4	0	0	0	0	2	0	0.699975
Q8VDD5_K1477	Myh9	EKETK*ALSLAR	MYH9_MOUSE Myosin-9 OS=Mus musculus OX=10090 GN=Myh9 PE=1 SV=4	0	0	2	1	2	1	1.08197
Q8VDD5_K1525	Myh9	SVHELEK*SK	MYH9_MOUSE Myosin-9 OS=Mus musculus OX=10090 GN=Myh9 PE=1 SV=4	0	0	6	5	6	6	1.10203
Q8VDD5_K1614	Myh9	K*LEMDLK	MYH9_MOUSE Myosin-9 OS=Mus musculus OX=10090 GN=Myh9 PE=1 SV=4	0	0	0	0	2	2	1.06953
Q8VDD5_K1620	Myh9	LEMDLK*DLEAHIDTANK	MYH9_MOUSE Myosin-9 OS=Mus musculus OX=10090 GN=Myh9 PE=1 SV=4	0	0	0	0	3	2	0.985696
Q8VDD5_K1638	Myh9	EEAIK*QLR	MYH9_MOUSE Myosin-9 OS=Mus musculus OX=10090 GN=Myh9 PE=1 SV=4	0	0	0	0	2	4	1.15691
Q8VDD5_K1669	Myh9	EEILAQAK*ENEK	MYH9_MOUSE Myosin-9 OS=Mus musculus OX=10090 GN=Myh9 PE=1 SV=4	0	0	1	1	0	3	1.07133
Q8VDD5_K1724	Myh9	GALALEEK*R	MYH9_MOUSE Myosin-9 OS=Mus musculus OX=10090 GN=Myh9 PE=1 SV=4	0	0	0	1	3	3	1.03956
Q8VDD5_K1775	Myh9	SHAQK*NENAR	MYH9_MOUSE Myosin-9 OS=Mus musculus OX=10090 GN=Myh9 PE=1 SV=4	0	0	5	4	6	1	1.04266
Q8VDD5_K1793	Myh9	AK*LQEMESAVK	MYH9_MOUSE Myosin-9 OS=Mus musculus OX=10090 GN=Myh9 PE=1 SV=4	0	0	2	0	2	3	1.15984
Q8VDD5_K1802	Myh9	LQEMESAVK*SK	MYH9_MOUSE Myosin-9 OS=Mus musculus OX=10090 GN=Myh9 PE=1 SV=4	0	0	0	2	3	4	1.04645
Q8VDD5_K1806	Myh9	YK*ASIAALEAK	MYH9_MOUSE Myosin-9 OS=Mus musculus OX=10090 GN=Myh9 PE=1 SV=4	0	0	5	0	1	3	1.03222
Q8VDD5_K1835	Myh9	QAASK*QVR	MYH9_MOUSE Myosin-9 OS=Mus musculus OX=10090 GN=Myh9 PE=1 SV=4	0	0	0	5	4	4	0.995343
Q8VDD5_K1918	Myh9	EVSSLK*NK	MYH9_MOUSE Myosin-9 OS=Mus musculus OX=10090 GN=Myh9 PE=1 SV=4	0	0	0	5	3	5	1.02104
Q8VDD5_K403	Myh9	DYVQK*AQTK	MYH9_MOUSE Myosin-9 OS=Mus musculus OX=10090 GN=Myh9 PE=1 SV=4	0	0	0	0	2	0	1.08333
Q8VDD5_K435	Myh9	INK*ALDK	MYH9_MOUSE Myosin-9 OS=Mus musculus OX=10090 GN=Myh9 PE=1 SV=4	1	0	0	0	0	0	1.02041
Q8VDD5_K545	Myh9	SFVEK*VVQEQGTHPK	MYH9_MOUSE Myosin-9 OS=Mus musculus OX=10090 GN=Myh9 PE=1 SV=4	0	0	0	0	3	0	1.06779
Q8VDD5_K637	Myh9	IIGLDQVAGMSETALPGAFK*TR	MYH9_MOUSE Myosin-9 OS=Mus musculus OX=10090 GN=Myh9 PE=1 SV=4	0	0	0	3	0	0	1.01429
Q8VDD5_K74	Myh9	VNKDDIQK*MNPPK	MYH9_MOUSE Myosin-9 OS=Mus musculus OX=10090 GN=Myh9 PE=1 SV=4	0	0	3	2	3	3	1.02767
Q8VDD5_K835	Myh9	VK*PLLNSIR	MYH9_MOUSE Myosin-9 OS=Mus musculus OX=10090 GN=Myh9 PE=1 SV=4	0	0	0	0	0	1	0.88496
Q8VDD5_K856	Myh9	EAELTK*VR	MYH9_MOUSE Myosin-9 OS=Mus musculus OX=10090 GN=Myh9 PE=1 SV=4	0	0	0	1	0	6	0.985291
Q8VDD5_K860	Myh9	EK*HLAAENR	MYH9_MOUSE Myosin-9 OS=Mus musculus OX=10090 GN=Myh9 PE=1 SV=4	0	0	1	0	4	0	1.14975
Q8VDD5_K961	Myh9	QK*LQLEK	MYH9_MOUSE Myosin-9 OS=Mus musculus OX=10090 GN=Myh9 PE=1 SV=4	0	0	0	0	0	1	0.74074
Q8VDD5_K972	Myh9	VTTEAK*LK	MYH9_MOUSE Myosin-9 OS=Mus musculus OX=10090 GN=Myh9 PE=1 SV=4	0	0	0	1	0	2	1.1517
Q8VDG3_K161	Parn	SQANGAGALAK*CPVTIPEDQKK	PARN_MOUSE Poly(A)-specific ribonuclease PARN OS=Mus musculus OX=10090 GN=Parn PE=1 SV=1	0	0	1	0	0	0	1.2987
Q8VDJ3_K599	Hdlbp	NIIGK*GGANIK	VIGLN_MOUSE Vigilin OS=Mus musculus OX=10090 GN=Hdlbp PE=1 SV=1	0	0	0	0	3	1	1.06295
Q8VDJ3_K745	Hdlbp	FLIGK*GGGK	VIGLN_MOUSE Vigilin OS=Mus musculus OX=10090 GN=Hdlbp PE=1 SV=1	0	0	0	0	0	1	1.31579
Q8VDJ3_K846	Hdlbp	SGTQSDK*VTLK	VIGLN_MOUSE Vigilin OS=Mus musculus OX=10090 GN=Hdlbp PE=1 SV=1	0	0	0	0	0	1	0.84034
Q8VDJ3_K850	Hdlbp	VTLK*GAK	VIGLN_MOUSE Vigilin OS=Mus musculus OX=10090 GN=Hdlbp PE=1 SV=1	0	0	0	0	6	0	1.18798
Q8VDM4_K350	Psmd2	VPDDIYK*THLENNR	PSMD2_MOUSE 26S proteasome non-ATPase regulatory subunit 2 OS=Mus musculus OX=10090 GN=Psmd2 PE=1 SV=1	0	0	0	0	1	0	1.23457
Q8VDM4_K66	Psmd2	LGEK*DTSLYRPALEELR	PSMD2_MOUSE 26S proteasome non-ATPase regulatory subunit 2 OS=Mus musculus OX=10090 GN=Psmd2 PE=1 SV=1	0	0	0	0	3	0	0.938487
Q8VDP4_K54	Ccar2	HLQSGEK*QR	CCAR2_MOUSE Cell cycle and apoptosis regulator protein 2 OS=Mus musculus OX=10090 GN=Ccar2 PE=1 SV=2	0	0	0	0	0	4	0.996255
Q8VEE4_K597	Rpa1	IK*ATVMDVKPVDFR	RFA1_MOUSE Replication protein A 70 kDa DNA-binding subunit OS=Mus musculus OX=10090 GN=Rpa1 PE=1 SV=1	0	0	0	0	0	2	0.905145
Q8VEK3_K17	Hnrnpu	VSELK*EELKK	HNRPU_MOUSE Heterogeneous nuclear ribonucleoprotein U OS=Mus musculus OX=10090 GN=Hnrnpu PE=1 SV=1	0	0	0	0	1	0	1.21382
Q8VEK3_K176	Hnrnpu	GAGK*EAAGK	HNRPU_MOUSE Heterogeneous nuclear ribonucleoprotein U OS=Mus musculus OX=10090 GN=Hnrnpu PE=1 SV=1	0	0	3	6	4	3	1.0328
Q8VEK3_K210	Hnrnpu	QGQQQAGGDGK*TEQK	HNRPU_MOUSE Heterogeneous nuclear ribonucleoprotein U OS=Mus musculus OX=10090 GN=Hnrnpu PE=1 SV=1	0	0	0	1	0	0	0.91743
Q8VEK3_K28	Hnrnpu	LSDK*GLK	HNRPU_MOUSE Heterogeneous nuclear ribonucleoprotein U OS=Mus musculus OX=10090 GN=Hnrnpu PE=1 SV=1	0	0	0	2	2	0	1.01155
Q8VEK3_K465	Hnrnpu	GPK*GPEEK	HNRPU_MOUSE Heterogeneous nuclear ribonucleoprotein U OS=Mus musculus OX=10090 GN=Hnrnpu PE=1 SV=1	0	0	0	0	0	1	1.36986
Q8VEK3_K527	Hnrnpu	QMADTGK*LNTLLQR	HNRPU_MOUSE Heterogeneous nuclear ribonucleoprotein U OS=Mus musculus OX=10090 GN=Hnrnpu PE=1 SV=1	0	0	2	1	0	5	1.04573
Q8VEK3_K578	Hnrnpu	K*AVVVCPK	HNRPU_MOUSE Heterogeneous nuclear ribonucleoprotein U OS=Mus musculus OX=10090 GN=Hnrnpu PE=1 SV=1	0	0	3	2	0	5	1.01078
Q8VEK3_K602	Hnrnpu	KAEVEGK*DLPEHAVLK	HNRPU_MOUSE Heterogeneous nuclear ribonucleoprotein U OS=Mus musculus OX=10090 GN=Hnrnpu PE=1 SV=1	0	0	0	0	1	2	1.31323
Q8VEK3_K611	Hnrnpu	DLPEHAVLK*MK	HNRPU_MOUSE Heterogeneous nuclear ribonucleoprotein U OS=Mus musculus OX=10090 GN=Hnrnpu PE=1 SV=1	0	0	4	4	6	6	1.03149
Q8VEK3_K640	Hnrnpu	EEAQK*LLEQYKEESK	HNRPU_MOUSE Heterogeneous nuclear ribonucleoprotein U OS=Mus musculus OX=10090 GN=Hnrnpu PE=1 SV=1	0	0	0	0	2	0	1.05309
Q8VEK3_K650	Hnrnpu	LLEQYKEESK*K	HNRPU_MOUSE Heterogeneous nuclear ribonucleoprotein U OS=Mus musculus OX=10090 GN=Hnrnpu PE=1 SV=1	0	0	0	0	2	0	0.99488
Q8VEK3_K658	Hnrnpu	K*QNTGSK	HNRPU_MOUSE Heterogeneous nuclear ribonucleoprotein U OS=Mus musculus OX=10090 GN=Hnrnpu PE=1 SV=1	0	0	0	4	0	2	0.935903
Q8VEM8_K247	Slc25a3	FVVPK*PR	MPCP_MOUSE Phosphate carrier protein, mitochondrial OS=Mus musculus OX=10090 GN=Slc25a3 PE=1 SV=1	0	0	0	0	0	6	1.04787
Q8VH51_K322	Rbm39	PMK*VGHVTER	RBM39_MOUSE RNA-binding protein 39 OS=Mus musculus OX=10090 GN=Rbm39 PE=1 SV=2	0	0	0	0	0	2	0.92664
Q8VHR5_K354	Gatad2b	QAAAK*LALR	P66B_MOUSE Transcriptional repressor p66-beta OS=Mus musculus OX=10090 GN=Gatad2b PE=1 SV=1	0	0	0	0	3	0	0.95946
Q8VI93_K367	Oas3	AGILDLGHPIYQGPNQALEDNK*GHLAVQSK	OAS3_MOUSE 2'-5'-oligoadenylate synthase 3 OS=Mus musculus OX=10090 GN=Oas3 PE=1 SV=1	0	0	0	0	1	0	0.83333
Q8VIJ6_K200	Sfpq	PGPGPGGPK*GGK	SFPQ_MOUSE Splicing factor, proline- and glutamine-rich OS=Mus musculus OX=10090 GN=Sfpq PE=1 SV=1	0	0	0	1	4	5	1.11889
Q8VIJ6_K224	Sfpq	PGGGPGMGAPGGHPK*PPHR	SFPQ_MOUSE Splicing factor, proline- and glutamine-rich OS=Mus musculus OX=10090 GN=Sfpq PE=1 SV=1	0	0	0	0	2	0	0.97318
Q8VIJ6_K311	Sfpq	LFAK*YGEPGEVFINK	SFPQ_MOUSE Splicing factor, proline- and glutamine-rich OS=Mus musculus OX=10090 GN=Sfpq PE=1 SV=1	0	0	0	0	1	1	1.23512
Q8VIJ6_K413	Sfpq	GIVEFASK*PAAR	SFPQ_MOUSE Splicing factor, proline- and glutamine-rich OS=Mus musculus OX=10090 GN=Sfpq PE=1 SV=1	0	0	0	3	0	5	0.995067
Q8VIJ6_K458	Sfpq	LAQK*NPMYQK	SFPQ_MOUSE Splicing factor, proline- and glutamine-rich OS=Mus musculus OX=10090 GN=Sfpq PE=1 SV=1	0	0	1	0	0	0	1.03093
Q8VIJ6_K464	Sfpq	NPMYQK*ER	SFPQ_MOUSE Splicing factor, proline- and glutamine-rich OS=Mus musculus OX=10090 GN=Sfpq PE=1 SV=1	0	0	0	0	0	1	1
Q8VIJ6_K553	Sfpq	K*EMQLR	SFPQ_MOUSE Splicing factor, proline- and glutamine-rich OS=Mus musculus OX=10090 GN=Sfpq PE=1 SV=1	0	0	0	0	0	1	1.49254
Q8WTY4_K261	Ciapin1	EQSK*AQSSQPK	CPIN1_MOUSE Anamorsin OS=Mus musculus OX=10090 GN=Ciapin1 PE=1 SV=1	0	0	1	0	0	0	1
Q91V12_K370	Acot7	YLQMK*AK	BACH_MOUSE Cytosolic acyl coenzyme A thioester hydrolase OS=Mus musculus OX=10090 GN=Acot7 PE=1 SV=2	0	0	0	0	3	0	0.8757
Q91V41_K193	Rab14	IYQNIQDGSLDLNAAESGVQHK*PSAPQGGR	RAB14_MOUSE Ras-related protein Rab-14 OS=Mus musculus OX=10090 GN=Rab14 PE=1 SV=3	0	0	0	0	3	0	1.12614
Q91V41_K59	Rab14	IIEVSGQK*IK	RAB14_MOUSE Ras-related protein Rab-14 OS=Mus musculus OX=10090 GN=Rab14 PE=1 SV=3	0	0	0	0	0	1	1.33333
Q91V92_K770	Acly	NQALK*EAGVFVPR	ACLY_MOUSE ATP-citrate synthase OS=Mus musculus OX=10090 GN=Acly PE=1 SV=1	0	0	0	0	1	0	1.0101
Q91VC3_K198	Eif4a3	GFK*EQIYDVYR	IF4A3_MOUSE Eukaryotic initiation factor 4A-III OS=Mus musculus OX=10090 GN=Eif4a3 PE=1 SV=3	0	0	0	0	1	0	0.90909
Q91VE6_K149	Nifk	PSFPAVK*R	MK67I_MOUSE MKI67 FHA domain-interacting nucleolar phosphoprotein OS=Mus musculus OX=10090 GN=Nifk PE=1 SV=1	0	0	0	0	0	1	0.86207
Q91VH2_K516	Snx9	GAIEK*VK	SNX9_MOUSE Sorting nexin-9 OS=Mus musculus OX=10090 GN=Snx9 PE=1 SV=1	0	0	0	2	3	2	1.15576
Q91VI7_K190	Rnh1	ILCQGLK*DSACQLESLK	RINI_MOUSE Ribonuclease inhibitor OS=Mus musculus OX=10090 GN=Rnh1 PE=1 SV=1	0	0	0	0	0	1	1.17647
Q91VM5_K147	Rbmxl1	GPLPVK*R	RMXL1_MOUSE RNA binding motif protein, X-linked-like-1 OS=Mus musculus OX=10090 GN=Rbmxl1 PE=2 SV=1	0	0	0	1	6	6	0.981744
Q91VM5_K86	Rbmxl1	VEQATK*PSFESGR	RMXL1_MOUSE RNA binding motif protein, X-linked-like-1 OS=Mus musculus OX=10090 GN=Rbmxl1 PE=2 SV=1	0	0	0	0	0	1	0.7874
Q91VR5_K281	Ddx1	SQHTGNAQVSQTK*FLPNAPK	DDX1_MOUSE ATP-dependent RNA helicase DDX1 OS=Mus musculus OX=10090 GN=Ddx1 PE=1 SV=1	0	0	1	0	0	1	0.98794
Q91VW3_K18	Sh3bgrl3	EIK*SQQSEVTR	SH3L3_MOUSE SH3 domain-binding glutamic acid-rich-like protein 3 OS=Mus musculus OX=10090 GN=Sh3bgrl3 PE=1 SV=1	0	0	2	0	0	1	0.984527
Q91VW5_K1792	Golga4	ALSGK*LDCTR	GOGA4_MOUSE Golgin subfamily A member 4 OS=Mus musculus OX=10090 GN=Golga4 PE=1 SV=2	0	0	0	0	0	1	1.20482
Q91VY5_K47	Kdm4b	AGLAK*IIPPK	KDM4B_MOUSE Lysine-specific demethylase 4B OS=Mus musculus OX=10090 GN=Kdm4b PE=2 SV=1	0	3	0	0	0	0	1.04942
Q91W50_K239	Csde1	NGK*EVATDVR	CSDE1_MOUSE Cold shock domain-containing protein E1 OS=Mus musculus OX=10090 GN=Csde1 PE=1 SV=1	0	0	1	0	1	0	1.04278
Q91W50_K573	Csde1	GNK*VSAEK	CSDE1_MOUSE Cold shock domain-containing protein E1 OS=Mus musculus OX=10090 GN=Csde1 PE=1 SV=1	0	0	0	0	1	0	1.06383
Q91W50_K743	Csde1	VCEGPK*AVAAPRPDR	CSDE1_MOUSE Cold shock domain-containing protein E1 OS=Mus musculus OX=10090 GN=Csde1 PE=1 SV=1	0	0	0	0	0	4	0.98047
Q91W50_K758	Csde1	LK*NITLDDASAPR	CSDE1_MOUSE Cold shock domain-containing protein E1 OS=Mus musculus OX=10090 GN=Csde1 PE=1 SV=1	0	0	0	0	0	4	1.0815
Q91W50_K81	Csde1	TGK*PIAIK	CSDE1_MOUSE Cold shock domain-containing protein E1 OS=Mus musculus OX=10090 GN=Csde1 PE=1 SV=1	0	0	0	2	1	5	1.13106
Q91WJ8_K166	Fubp1	LLDQIVEK*GR	FUBP1_MOUSE Far upstream element-binding protein 1 OS=Mus musculus OX=10090 GN=Fubp1 PE=1 SV=1	0	0	0	0	0	1	1.33333
Q91WK2_K178	Eif3h	LMEVCK*EK	EIF3H_MOUSE Eukaryotic translation initiation factor 3 subunit H OS=Mus musculus OX=10090 GN=Eif3h PE=1 SV=1	0	0	0	0	3	2	1.06659
Q91WK2_K269	Eif3h	NTSK*QQQQK	EIF3H_MOUSE Eukaryotic translation initiation factor 3 subunit H OS=Mus musculus OX=10090 GN=Eif3h PE=1 SV=1	0	0	1	2	2	2	0.98086
Q91WK2_K274	Eif3h	QQQQK*HQYQQR	EIF3H_MOUSE Eukaryotic translation initiation factor 3 subunit H OS=Mus musculus OX=10090 GN=Eif3h PE=1 SV=1	0	0	0	0	1	0	1.26582
Q91WN1_K165	Dnajc9	NIIQK*AIESK	DNJC9_MOUSE DnaJ homolog subfamily C member 9 OS=Mus musculus OX=10090 GN=Dnajc9 PE=1 SV=2	0	0	0	0	2	0	1.39803
Q91WQ3_K147	Yars1	K*AGAEVVK	SYYC_MOUSE Tyrosine--tRNA ligase, cytoplasmic OS=Mus musculus OX=10090 GN=Yars1 PE=1 SV=3	0	0	0	5	4	2	1.01274
Q91X78_K269	Erlin1	ADAEYYAAHK*YATSNK	ERLN1_MOUSE Erlin-1 OS=Mus musculus OX=10090 GN=Erlin1 PE=1 SV=2	0	0	0	0	3	0	1.00936
Q91YI4_K296	Arrb2	GLALDGQLK*HEDTNLASSTIVK	ARRB2_MOUSE Beta-arrestin-2 OS=Mus musculus OX=10090 GN=Arrb2 PE=1 SV=1	0	0	0	0	4	4	1.03535
Q91YM4_K617	Tbrg4	SAYLK*DK	FAKD4_MOUSE FAST kinase domain-containing protein 4 OS=Mus musculus OX=10090 GN=Tbrg4 PE=1 SV=1	0	0	0	0	2	0	1.17054
Q91YN9_K9	Bag2	ISAK*AHEGR	BAG2_MOUSE BAG family molecular chaperone regulator 2 OS=Mus musculus OX=10090 GN=Bag2 PE=1 SV=1	0	0	0	0	4	3	1.07054
Q91YQ5_K517	Rpn1	DISTLNSGK*K	RPN1_MOUSE Dolichyl-diphosphooligosaccharide--protein glycosyltransferase subunit 1 OS=Mus musculus OX=10090 GN=Rpn1 PE=1 SV=1	0	0	0	3	1	4	0.997144
Q91YQ5_K539	Rpn1	LK*TEGSDLCDR	RPN1_MOUSE Dolichyl-diphosphooligosaccharide--protein glycosyltransferase subunit 1 OS=Mus musculus OX=10090 GN=Rpn1 PE=1 SV=1	0	0	3	0	1	4	0.992954
Q91YQ5_K560	Rpn1	LDAQVK*ELVLK	RPN1_MOUSE Dolichyl-diphosphooligosaccharide--protein glycosyltransferase subunit 1 OS=Mus musculus OX=10090 GN=Rpn1 PE=1 SV=1	0	0	0	0	1	2	0.974957
Q91YQ5_K565	Rpn1	ELVLK*SAVEAER	RPN1_MOUSE Dolichyl-diphosphooligosaccharide--protein glycosyltransferase subunit 1 OS=Mus musculus OX=10090 GN=Rpn1 PE=1 SV=1	0	0	0	0	1	0	1.38889
Q91YQ5_K580	Rpn1	K*DTYLENEK	RPN1_MOUSE Dolichyl-diphosphooligosaccharide--protein glycosyltransferase subunit 1 OS=Mus musculus OX=10090 GN=Rpn1 PE=1 SV=1	0	0	1	0	0	0	1.33333
Q91YR7_K768	Prpf6	AILEK*SR	PRP6_MOUSE Pre-mRNA-processing factor 6 OS=Mus musculus OX=10090 GN=Prpf6 PE=1 SV=1	0	0	0	0	1	0	1.05263
Q91ZX7_K2144	Lrp1	TGIGVQLK*DIK	LRP1_MOUSE Prolow-density lipoprotein receptor-related protein 1 OS=Mus musculus OX=10090 GN=Lrp1 PE=1 SV=1	0	0	0	0	1	1	0.956395
Q920B9_K115	Supt16h	EKNESNK*SSFDK	SP16H_MOUSE FACT complex subunit SPT16 OS=Mus musculus OX=10090 GN=Supt16h PE=1 SV=2	0	0	0	0	1	1	1.13636
Q920B9_K497	Supt16h	LTEQK*GEQQIQK	SP16H_MOUSE FACT complex subunit SPT16 OS=Mus musculus OX=10090 GN=Supt16h PE=1 SV=2	0	0	0	0	1	0	0.76336
Q920B9_K504	Supt16h	GEQQIQK*AR	SP16H_MOUSE FACT complex subunit SPT16 OS=Mus musculus OX=10090 GN=Supt16h PE=1 SV=2	0	0	0	0	0	1	0.91755
Q920E5_K31	Fdps	VLTEK*ELGHPEIGDAIAR	FPPS_MOUSE Farnesyl pyrophosphate synthase OS=Mus musculus OX=10090 GN=Fdps PE=1 SV=1	0	0	1	0	6	4	1.05276
Q920E5_K46	Fdps	LK*EVLEYNALGGK	FPPS_MOUSE Farnesyl pyrophosphate synthase OS=Mus musculus OX=10090 GN=Fdps PE=1 SV=1	0	0	1	0	0	1	1.00608
Q921F2_K181	Tardbp	LPNSK*QSPDEPLR	TADBP_MOUSE TAR DNA-binding protein 43 OS=Mus musculus OX=10090 GN=Tardbp PE=1 SV=1	0	0	1	0	0	0	0.98039
Q921H8_K261	Acaa1a	LK*PAFK	THIKA_MOUSE 3-ketoacyl-CoA thiolase A, peroxisomal OS=Mus musculus OX=10090 GN=Acaa1a PE=1 SV=1	0	0	0	0	1	0	0.91743
Q921T2_K470	Tor1aip1	AAQDSDLVK*HEVDQELTDGFK	TOIP1_MOUSE Torsin-1A-interacting protein 1 OS=Mus musculus OX=10090 GN=Tor1aip1 PE=1 SV=3	0	0	0	0	1	0	1.14943
Q922B2_K9	Dars1	K*GQEKPR	SYDC_MOUSE Aspartate--tRNA ligase, cytoplasmic OS=Mus musculus OX=10090 GN=Dars1 PE=1 SV=2	0	0	2	1	0	0	1.02365
Q922D8_K553	Mthfd1	ITIGQSPTEK*GHTR	C1TC_MOUSE C-1-tetrahydrofolate synthase, cytoplasmic OS=Mus musculus OX=10090 GN=Mthfd1 PE=1 SV=4	0	0	0	0	5	2	0.947173
Q922D8_K58	Mthfd1	LK*AAEEIGIK	C1TC_MOUSE C-1-tetrahydrofolate synthase, cytoplasmic OS=Mus musculus OX=10090 GN=Mthfd1 PE=1 SV=4	0	0	1	0	2	3	1.04036
Q922K7_K456	Nop2	VLLDAPCSGTGVISK*DPAVK	NOP2_MOUSE Probable 28S rRNA (cytosine-C(5))-methyltransferase OS=Mus musculus OX=10090 GN=Nop2 PE=1 SV=1	0	0	0	1	0	0	1.19048
Q922K7_K722	Nop2	PK*DCAPSLGK	NOP2_MOUSE Probable 28S rRNA (cytosine-C(5))-methyltransferase OS=Mus musculus OX=10090 GN=Nop2 PE=1 SV=1	0	0	2	0	1	4	0.942116
Q922Q1_K156	Mtarc2	LFGLDIK*GR	MARC2_MOUSE Mitochondrial amidoxime reducing component 2 OS=Mus musculus OX=10090 GN=Mtarc2 PE=1 SV=1	0	0	0	1	0	0	0.84746
Q922Q8_K219	Lrrc59	K*EANQAPK	LRC59_MOUSE Leucine-rich repeat-containing protein 59 OS=Mus musculus OX=10090 GN=Lrrc59 PE=1 SV=1	0	0	1	1	0	0	1.0618
Q922Q8_K226	Lrrc59	KEANQAPK*SK	LRC59_MOUSE Leucine-rich repeat-containing protein 59 OS=Mus musculus OX=10090 GN=Lrrc59 PE=1 SV=1	0	0	0	1	0	0	0.9901
Q922Q8_K7	Lrrc59	AGSK*GGNLR	LRC59_MOUSE Leucine-rich repeat-containing protein 59 OS=Mus musculus OX=10090 GN=Lrrc59 PE=1 SV=1	0	0	0	0	3	0	0.8242
Q922Q8_K71	Lrrc59	LDLSK*NK	LRC59_MOUSE Leucine-rich repeat-containing protein 59 OS=Mus musculus OX=10090 GN=Lrrc59 PE=1 SV=1	0	0	0	6	4	6	1.05098
Q922R8_K150	Pdia6	SGGYSSGK*QGR	PDIA6_MOUSE Protein disulfide-isomerase A6 OS=Mus musculus OX=10090 GN=Pdia6 PE=1 SV=3	0	0	1	2	0	2	1.07528
Q922R8_K235	Pdia6	YGIK*GFPTIK	PDIA6_MOUSE Protein disulfide-isomerase A6 OS=Mus musculus OX=10090 GN=Pdia6 PE=1 SV=3	0	0	5	0	5	2	1.2367
Q922R8_K85	Pdia6	VGAVNADK*HQSLGGQYGVQGFPTIK	PDIA6_MOUSE Protein disulfide-isomerase A6 OS=Mus musculus OX=10090 GN=Pdia6 PE=1 SV=3	0	0	0	0	5	1	1.16128
Q922S8_K101	Kif2c	IPALK*EGLR	KIF2C_MOUSE Kinesin-like protein KIF2C OS=Mus musculus OX=10090 GN=Kif2c PE=1 SV=1	0	0	0	0	5	0	1.00135
Q922S8_K293	Kif2c	LK*VDLTK	KIF2C_MOUSE Kinesin-like protein KIF2C OS=Mus musculus OX=10090 GN=Kif2c PE=1 SV=1	0	0	0	0	0	1	0.8547
Q922V4_K62	Plrg1	NEYGPVLHMPTSK*ENLK	PLRG1_MOUSE Pleiotropic regulator 1 OS=Mus musculus OX=10090 GN=Plrg1 PE=1 SV=1	0	0	0	0	0	1	1
Q925E0_K238	Sntg2	AGTEK*LR	SNTG2_MOUSE Gamma-2-syntrophin OS=Mus musculus OX=10090 GN=Sntg2 PE=1 SV=1	0	0	0	0	1	0	0.9434
Q925I1_K213	Atad3	LK*AAEHR	ATAD3_MOUSE ATPase family AAA domain-containing protein 3 OS=Mus musculus OX=10090 GN=Atad3 PE=1 SV=1	0	0	0	0	1	0	0.93458
Q925I1_K423	Atad3	ATEK*ISEDLR	ATAD3_MOUSE ATPase family AAA domain-containing protein 3 OS=Mus musculus OX=10090 GN=Atad3 PE=1 SV=1	0	0	0	0	0	1	1.28205
Q93092_K265	Taldo1	LLGELLK*DNSK	TALDO_MOUSE Transaldolase OS=Mus musculus OX=10090 GN=Taldo1 PE=1 SV=2	0	0	0	0	0	2	1.07367
Q93092_K286	Taldo1	AAQTSDSEK*IHLDEK	TALDO_MOUSE Transaldolase OS=Mus musculus OX=10090 GN=Taldo1 PE=1 SV=2	0	0	0	0	6	3	1.11007
Q93092_K321	Taldo1	FAADAIK*LER	TALDO_MOUSE Transaldolase OS=Mus musculus OX=10090 GN=Taldo1 PE=1 SV=2	0	0	0	0	0	2	0.80666
Q99020_K136	Hnrnpab	VLDQK*EHR	ROAA_MOUSE Heterogeneous nuclear ribonucleoprotein A/B OS=Mus musculus OX=10090 GN=Hnrnpab PE=1 SV=1	0	0	0	0	4	2	1.00735
Q99020_K160	Hnrnpab	K*IFVGGLNPEATEEK	ROAA_MOUSE Heterogeneous nuclear ribonucleoprotein A/B OS=Mus musculus OX=10090 GN=Hnrnpab PE=1 SV=1	0	0	2	0	0	2	0.970477
Q99020_K174	Hnrnpab	IFVGGLNPEATEEK*IR	ROAA_MOUSE Heterogeneous nuclear ribonucleoprotein A/B OS=Mus musculus OX=10090 GN=Hnrnpab PE=1 SV=1	0	0	0	5	3	4	1.07906
Q99020_K271	Hnrnpab	GSGGGQGSTNYGK*SQR	ROAA_MOUSE Heterogeneous nuclear ribonucleoprotein A/B OS=Mus musculus OX=10090 GN=Hnrnpab PE=1 SV=1	0	0	0	2	0	1	1.23843
Q99J19_K41	Smim11a	SLEGK*LQAEK	SI11A_MOUSE Small integral membrane protein 11A OS=Mus musculus OX=10090 GN=Smim11a PE=1 SV=1	0	0	0	0	1	0	1.0001
Q99J77_K290	Nans	QLLPCEMACNEK*LGK	SIAS_MOUSE Sialic acid synthase OS=Mus musculus OX=10090 GN=Nans PE=1 SV=1	0	0	0	0	0	1	1.25
Q99J77_K61	Nans	SELEFK*FNR	SIAS_MOUSE Sialic acid synthase OS=Mus musculus OX=10090 GN=Nans PE=1 SV=1	0	0	0	0	0	1	0.86207
Q99J95_K21	Cdk9	YEK*LAK	CDK9_MOUSE Cyclin-dependent kinase 9 OS=Mus musculus OX=10090 GN=Cdk9 PE=1 SV=1	0	0	0	0	2	0	1.02211
Q99JI4_K163	Psmd6	NTEK*AK	PSMD6_MOUSE 26S proteasome non-ATPase regulatory subunit 6 OS=Mus musculus OX=10090 GN=Psmd6 PE=1 SV=1	0	0	0	4	5	5	1.03296
Q99JI4_K372	Psmd6	K*GDLLLNR	PSMD6_MOUSE 26S proteasome non-ATPase regulatory subunit 6 OS=Mus musculus OX=10090 GN=Psmd6 PE=1 SV=1	0	0	0	0	0	1	1.04079
Q99JP4_K68	Cdc26	IGYK*PQLK	CDC26_MOUSE Anaphase-promoting complex subunit CDC26 OS=Mus musculus OX=10090 GN=Cdc26 PE=1 SV=1	0	0	0	0	1	0	0.82645
Q99JY9_K348	Actr3	LK*LSEELSGGR	ARP3_MOUSE Actin-related protein 3 OS=Mus musculus OX=10090 GN=Actr3 PE=1 SV=3	0	0	2	0	1	4	1.04658
Q99K48_K11	Nono	AFNLEK*QNHTPR	NONO_MOUSE Non-POU domain-containing octamer-binding protein OS=Mus musculus OX=10090 GN=Nono PE=1 SV=3	0	0	0	0	2	5	1.0218
Q99K48_K200	Nono	GIVEFSGK*PAAR	NONO_MOUSE Non-POU domain-containing octamer-binding protein OS=Mus musculus OX=10090 GN=Nono PE=1 SV=3	0	0	0	0	0	5	1.14936
Q99K48_K251	Nono	NQQFHK*ER	NONO_MOUSE Non-POU domain-containing octamer-binding protein OS=Mus musculus OX=10090 GN=Nono PE=1 SV=3	0	0	3	0	5	3	1.04535
Q99K48_K338	Nono	MEELHNQEVQK*R	NONO_MOUSE Non-POU domain-containing octamer-binding protein OS=Mus musculus OX=10090 GN=Nono PE=1 SV=3	0	0	0	0	0	1	0.9434
Q99K48_K469	Nono	PAPGAEFAPNK*R	NONO_MOUSE Non-POU domain-containing octamer-binding protein OS=Mus musculus OX=10090 GN=Nono PE=1 SV=3	0	0	0	0	1	0	1.49254
Q99K48_K5	Nono	K*AFNLEK	NONO_MOUSE Non-POU domain-containing octamer-binding protein OS=Mus musculus OX=10090 GN=Nono PE=1 SV=3	0	0	0	0	1	0	1.25
Q99K48_K98	Nono	LFEK*YGK	NONO_MOUSE Non-POU domain-containing octamer-binding protein OS=Mus musculus OX=10090 GN=Nono PE=1 SV=3	0	0	0	0	1	1	1.04978
Q99K85_K116	Psat1	AAEEAK*K	SERC_MOUSE Phosphoserine aminotransferase OS=Mus musculus OX=10090 GN=Psat1 PE=1 SV=1	0	0	0	3	2	0	1.30236
Q99KB8_K117	Hagh	LVK*LEPGLK	GLO2_MOUSE Hydroxyacylglutathione hydrolase, mitochondrial OS=Mus musculus OX=10090 GN=Hagh PE=1 SV=2	0	0	0	0	0	2	1.18588
Q99KC8_K12	Vwa5a	CGLITSNK*ETVPLK	VMA5A_MOUSE von Willebrand factor A domain-containing protein 5A OS=Mus musculus OX=10090 GN=Vwa5a PE=1 SV=2	0	0	0	0	0	1	0.68493
Q99KC8_K223	Vwa5a	TSAQVSLTEGHK*FDR	VMA5A_MOUSE von Willebrand factor A domain-containing protein 5A OS=Mus musculus OX=10090 GN=Vwa5a PE=1 SV=2	0	0	0	0	1	0	1.02041
Q99KC8_K666	Vwa5a	K*TNSSTNK	VMA5A_MOUSE von Willebrand factor A domain-containing protein 5A OS=Mus musculus OX=10090 GN=Vwa5a PE=1 SV=2	0	0	0	1	0	0	1.03093
Q99KD5_K116	Unc45a	LDQAVLDLK*R	UN45A_MOUSE Protein unc-45 homolog A OS=Mus musculus OX=10090 GN=Unc45a PE=1 SV=2	0	0	0	1	0	1	1.34408
Q99KJ8_K175	Dctn2	LLGPDAAINLADPDGALAK*R	DCTN2_MOUSE Dynactin subunit 2 OS=Mus musculus OX=10090 GN=Dctn2 PE=1 SV=3	0	0	0	2	0	0	0.927915
Q99KJ8_K65	Dctn2	VGTK*GLDFSDR	DCTN2_MOUSE Dynactin subunit 2 OS=Mus musculus OX=10090 GN=Dctn2 PE=1 SV=3	0	0	0	0	0	1	0.95238
Q99KK7_K209	Dpp3	VVGQEGK*SHYEVR	DPP3_MOUSE Dipeptidyl peptidase 3 OS=Mus musculus OX=10090 GN=Dpp3 PE=1 SV=2	0	0	0	0	1	0	1.17567
Q99KP6_K192	Prpf19	GK*TVPEELVKPEELSK	PRP19_MOUSE Pre-mRNA-processing factor 19 OS=Mus musculus OX=10090 GN=Prpf19 PE=1 SV=1	0	0	0	1	0	3	0.846857
Q99L45_K291	Eif2s2	SPDTILQK*DTR	IF2B_MOUSE Eukaryotic translation initiation factor 2 subunit 2 OS=Mus musculus OX=10090 GN=Eif2s2 PE=1 SV=1	0	0	0	0	0	1	1.36986
Q99L47_K117	St13	K*GAAIEALNDGELQK	F10A1_MOUSE Hsc70-interacting protein OS=Mus musculus OX=10090 GN=St13 PE=1 SV=1	0	0	1	0	0	1	0.7941
Q99LC3_K191	Ndufa10	QCVDHYNEIK*R	NDUAA_MOUSE NADH dehydrogenase [ubiquinone] 1 alpha subcomplex subunit 10, mitochondrial OS=Mus musculus OX=10090 GN=Ndufa10 PE=1 SV=1	0	0	0	0	5	0	0.979516
Q99LD4_K138	Gps1	GNSIK*ESIR	CSN1_MOUSE COP9 signalosome complex subunit 1 OS=Mus musculus OX=10090 GN=Gps1 PE=1 SV=1	0	0	0	0	0	2	1.17573
Q99LD9_K7	Eif2b2	PGAAAK*GSELSER	EI2BB_MOUSE Translation initiation factor eIF-2B subunit beta OS=Mus musculus OX=10090 GN=Eif2b2 PE=1 SV=1	0	0	0	0	1	2	1.10625
Q99LE6_K356	Abcf2	FGHGSAK*LAR	ABCF2_MOUSE ATP-binding cassette sub-family F member 2 OS=Mus musculus OX=10090 GN=Abcf2 PE=1 SV=1	0	0	0	0	3	0	0.938097
Q99LE6_K364	Abcf2	QAQSK*EK	ABCF2_MOUSE ATP-binding cassette sub-family F member 2 OS=Mus musculus OX=10090 GN=Abcf2 PE=1 SV=1	0	0	0	2	1	3	1.15603
Q99LE6_K513	Abcf2	YGLTGK*QQVSPIR	ABCF2_MOUSE ATP-binding cassette sub-family F member 2 OS=Mus musculus OX=10090 GN=Abcf2 PE=1 SV=1	0	0	0	0	0	1	0.97087
Q99LE6_K613	Abcf2	SK*LVDEEPQLTK	ABCF2_MOUSE ATP-binding cassette sub-family F member 2 OS=Mus musculus OX=10090 GN=Abcf2 PE=1 SV=1	0	0	1	0	0	4	1.05035
Q99LH1_K603	Gnl2	ALDEK*IAK	NOG2_MOUSE Nucleolar GTP-binding protein 2 OS=Mus musculus OX=10090 GN=Gnl2 PE=1 SV=2	0	0	0	0	1	1	0.77147
Q99LP6_K64	Grpel1	TLLEEK*AK	GRPE1_MOUSE GrpE protein homolog 1, mitochondrial OS=Mus musculus OX=10090 GN=Grpel1 PE=1 SV=1	0	0	0	1	0	4	1.06857
Q99LX0_K130	Park7	VTTHPLAK*DK	PARK7_MOUSE Parkinson disease protein 7 homolog OS=Mus musculus OX=10090 GN=Park7 PE=1 SV=1	0	0	0	0	2	1	1.36492
Q99M87_K299	Dnaja3	GAGQAK*QK	DNJA3_MOUSE DnaJ homolog subfamily A member 3, mitochondrial OS=Mus musculus OX=10090 GN=Dnaja3 PE=1 SV=1	0	0	0	2	0	0	0.706215
Q99MD9_K684	Nasp	K*PTDGASSSNCVTDISHLVR	NASP_MOUSE Nuclear autoantigenic sperm protein OS=Mus musculus OX=10090 GN=Nasp PE=1 SV=2	0	0	0	0	0	4	1.07841
Q99ME9_K619	Gtpbp4	PK*HLLSGK	NOG1_MOUSE Nucleolar GTP-binding protein 1 OS=Mus musculus OX=10090 GN=Gtpbp4 PE=1 SV=3	0	0	0	0	1	0	0.96154
Q99MN1_K173	Kars1	SEEEFVHINNK*LR	SYK_MOUSE Lysine--tRNA ligase OS=Mus musculus OX=10090 GN=Kars1 PE=1 SV=1	0	0	0	0	4	4	0.98209
Q99MN1_K19	Kars1	LSK*NELK	SYK_MOUSE Lysine--tRNA ligase OS=Mus musculus OX=10090 GN=Kars1 PE=1 SV=1	0	0	0	0	1	0	1.1236
Q99N85_K45	Mrps18a	IQEGK*TTVIEGR	RT18A_MOUSE 28S ribosomal protein S18a, mitochondrial OS=Mus musculus OX=10090 GN=Mrps18a PE=2 SV=1	0	0	0	0	0	1	1
Q99NB8_K18	Ubqln4	VTVK*TPK	UBQL4_MOUSE Ubiquilin-4 OS=Mus musculus OX=10090 GN=Ubqln4 PE=1 SV=1	0	0	0	3	2	2	1.02925
Q99P72_K1153	Rtn4	IQAK*IPGLK	RTN4_MOUSE Reticulon-4 OS=Mus musculus OX=10090 GN=Rtn4 PE=1 SV=2	0	0	1	0	3	3	1.04774
Q99P88_K766	Nup155	K*FQEAQLSEK	NU155_MOUSE Nuclear pore complex protein Nup155 OS=Mus musculus OX=10090 GN=Nup155 PE=1 SV=1	0	0	4	0	3	3	0.93893
Q99PG2_K142	Ogfr	PLTLK*EVEAFK	OGFR_MOUSE Opioid growth factor receptor OS=Mus musculus OX=10090 GN=Ogfr PE=1 SV=1	0	0	0	0	0	1	0.79365
Q99PL5_K1061	Rrbp1	ALEAK*AATFEK	RRBP1_MOUSE Ribosome-binding protein 1 OS=Mus musculus OX=10090 GN=Rrbp1 PE=1 SV=2	0	0	0	0	2	0	0.882445
Q99PL5_K1135	Rrbp1	SK*CEELSSLHGQLK	RRBP1_MOUSE Ribosome-binding protein 1 OS=Mus musculus OX=10090 GN=Rrbp1 PE=1 SV=2	0	0	1	2	0	3	0.790573
Q99PL5_K1241	Rrbp1	ACEEK*LR	RRBP1_MOUSE Ribosome-binding protein 1 OS=Mus musculus OX=10090 GN=Rrbp1 PE=1 SV=2	0	0	0	2	1	1	0.921042
Q99PL5_K1368	Rrbp1	VGAAEEELHK*SR	RRBP1_MOUSE Ribosome-binding protein 1 OS=Mus musculus OX=10090 GN=Rrbp1 PE=1 SV=2	0	0	0	0	1	0	1.07989
Q99PL5_K1564	Rrbp1	AAIK*LQELLK	RRBP1_MOUSE Ribosome-binding protein 1 OS=Mus musculus OX=10090 GN=Rrbp1 PE=1 SV=2	0	0	0	2	2	2	0.938643
Q99PT1_K138	Arhgdia	KGVK*IDK	GDIR1_MOUSE Rho GDP-dissociation inhibitor 1 OS=Mus musculus OX=10090 GN=Arhgdia PE=1 SV=3	0	0	0	0	2	0	0.933585
Q99PT1_K178	Arhgdia	GSYNIK*SR	GDIR1_MOUSE Rho GDP-dissociation inhibitor 1 OS=Mus musculus OX=10090 GN=Arhgdia PE=1 SV=3	0	0	0	6	6	6	1.00746
Q99PT1_K52	Arhgdia	YK*EALLGR	GDIR1_MOUSE Rho GDP-dissociation inhibitor 1 OS=Mus musculus OX=10090 GN=Arhgdia PE=1 SV=3	0	0	3	0	0	1	1.07655
Q99PV0_K769	Prpf8	GATVDK*TVCK	PRP8_MOUSE Pre-mRNA-processing-splicing factor 8 OS=Mus musculus OX=10090 GN=Prpf8 PE=1 SV=2	0	0	0	1	4	3	1.06473
Q9CPP0_K169	Npm3	LCGILPAK*K	NPM3_MOUSE Nucleoplasmin-3 OS=Mus musculus OX=10090 GN=Npm3 PE=1 SV=3	0	0	0	0	0	2	0.783745
Q9CPQ8_K61	Atp5mg	IIQSAK*TGSFK	ATP5L_MOUSE ATP synthase subunit g, mitochondrial OS=Mus musculus OX=10090 GN=Atp5mg PE=1 SV=1	0	0	0	1	0	1	1.2887
Q9CPR4_K13	Rpl17	YSLDPENPTK*SCK	RL17_MOUSE 60S ribosomal protein L17 OS=Mus musculus OX=10090 GN=Rpl17 PE=1 SV=3	0	0	0	0	3	1	1.23663
Q9CPR4_K49	Rpl17	YLK*DVTLK	RL17_MOUSE 60S ribosomal protein L17 OS=Mus musculus OX=10090 GN=Rpl17 PE=1 SV=3	0	0	0	1	4	1	1.12437
Q9CPR5_K283	Mrpl15	ILK*PTDENLLK	RM15_MOUSE 39S ribosomal protein L15, mitochondrial OS=Mus musculus OX=10090 GN=Mrpl15 PE=1 SV=1	1	0	0	0	0	0	1.20482
Q9CPT5_K151	Nop16	NK*INVYK	NOP16_MOUSE Nucleolar protein 16 OS=Mus musculus OX=10090 GN=Nop16 PE=1 SV=1	0	0	0	0	4	0	0.946268
Q9CPX6_K185	Atg3	AK*ADAGGEDAILQTR	ATG3_MOUSE Ubiquitin-like-conjugating enzyme ATG3 OS=Mus musculus OX=10090 GN=Atg3 PE=1 SV=1	0	0	0	0	0	2	0.91743
Q9CQ06_K32	Mrpl24	PGSIADK*R	RM24_MOUSE 39S ribosomal protein L24, mitochondrial OS=Mus musculus OX=10090 GN=Mrpl24 PE=1 SV=1	0	0	0	0	1	0	1.19868
Q9CQ21_K51	Mcts2	KDPVK*IVR	MCTS2_MOUSE Malignant T-cell-amplified sequence 2 OS=Mus musculus OX=10090 GN=Mcts2 PE=1 SV=1	0	0	0	3	3	5	1.01718
Q9CQ60_K253	Pgls	LLSVPFEK*HSTL	6PGL_MOUSE 6-phosphogluconolactonase OS=Mus musculus OX=10090 GN=Pgls PE=1 SV=1	0	0	0	0	2	0	1.20423
Q9CQ71_K33	Rpa3	LEK*IHPTGK	RFA3_MOUSE Replication protein A 14 kDa subunit OS=Mus musculus OX=10090 GN=Rpa3 PE=1 SV=1	0	0	0	0	0	1	1.38889
Q9CQC6_K239	Bzw1	YFTEAGLK*ELSEYVR	BZW1_MOUSE Basic leucine zipper and W2 domain-containing protein 1 OS=Mus musculus OX=10090 GN=Bzw1 PE=1 SV=1	0	0	0	0	1	0	1.02041
Q9CQC6_K388	Bzw1	DAHVAK*GK	BZW1_MOUSE Basic leucine zipper and W2 domain-containing protein 1 OS=Mus musculus OX=10090 GN=Bzw1 PE=1 SV=1	0	0	0	0	1	0	1.25
Q9CQC6_K60	Bzw1	FLDASGAK*LDYR	BZW1_MOUSE Basic leucine zipper and W2 domain-containing protein 1 OS=Mus musculus OX=10090 GN=Bzw1 PE=1 SV=1	0	0	4	4	3	1	1.0069
Q9CQE8_K108	RTRAF	K*NTDNAAK	RTRAF_MOUSE RNA transcription, translation and transport factor protein OS=Mus musculus OX=10090 GN=RTRAF PE=1 SV=1	0	0	0	1	0	0	0.88496
Q9CQE8_K20	RTRAF	LTALDYHNPSGFNCK*DETEFR	RTRAF_MOUSE RNA transcription, translation and transport factor protein OS=Mus musculus OX=10090 GN=RTRAF PE=1 SV=1	0	0	0	0	1	1	1.22549
Q9CQE8_K241	RTRAF	LGK*VGR	RTRAF_MOUSE RNA transcription, translation and transport factor protein OS=Mus musculus OX=10090 GN=RTRAF PE=1 SV=1	0	0	0	1	0	4	1.06869
Q9CQI3_K110	Gmfb	NK*LVQTAELTK	GMFB_MOUSE Glia maturation factor beta OS=Mus musculus OX=10090 GN=Gmfb PE=1 SV=3	0	0	0	0	0	1	0.93458
Q9CQI6_K7	Cotl1	IDK*EACR	COTL1_MOUSE Coactosin-like protein OS=Mus musculus OX=10090 GN=Cotl1 PE=1 SV=3	0	0	0	0	0	1	0.88496
Q9CQI7_K101	Snrpb2	GTFADK*EK	RU2B_MOUSE U2 small nuclear ribonucleoprotein B'' OS=Mus musculus OX=10090 GN=Snrpb2 PE=1 SV=1	0	0	0	0	1	0	1.08696
Q9CQJ6_K18	Denr	GDTK*NSAK	DENR_MOUSE Density-regulated protein OS=Mus musculus OX=10090 GN=Denr PE=1 SV=1	0	0	0	4	1	0	0.948676
Q9CQM9_K236	Glrx3	APK*LEER	GLRX3_MOUSE Glutaredoxin-3 OS=Mus musculus OX=10090 GN=Glrx3 PE=1 SV=1	0	0	0	0	1	3	0.952527
Q9CQM9_K324	Glrx3	ELK*DNGELLPILK	GLRX3_MOUSE Glutaredoxin-3 OS=Mus musculus OX=10090 GN=Glrx3 PE=1 SV=1	0	0	0	0	0	2	0.935315
Q9CQM9_K98	Glrx3	NSQK*VDR	GLRX3_MOUSE Glutaredoxin-3 OS=Mus musculus OX=10090 GN=Glrx3 PE=1 SV=1	0	0	0	1	0	3	1.09705
Q9CQQ7_K162	Atp5pb	AQQALVQK*R	AT5F1_MOUSE ATP synthase F(0) complex subunit B1, mitochondrial OS=Mus musculus OX=10090 GN=Atp5pb PE=1 SV=1	0	0	0	5	0	5	1.2387
Q9CQQ8_K26	Lsm7	VK*FQGGR	LSM7_MOUSE U6 snRNA-associated Sm-like protein LSm7 OS=Mus musculus OX=10090 GN=Lsm7 PE=1 SV=1	0	0	0	0	0	1	0.6993
Q9CQR2_K74	Rps21	LAK*ADGIVSK	RS21_MOUSE 40S ribosomal protein S21 OS=Mus musculus OX=10090 GN=Rps21 PE=1 SV=1	0	0	0	0	0	3	1.03737
Q9CQS8_K20	Sec61b	SPSK*AVAAR	SC61B_MOUSE Protein transport protein Sec61 subunit beta OS=Mus musculus OX=10090 GN=Sec61b PE=1 SV=3	0	0	1	3	0	5	0.925877
Q9CQS8_K35	Sec61b	K*NASCGTR	SC61B_MOUSE Protein transport protein Sec61 subunit beta OS=Mus musculus OX=10090 GN=Sec61b PE=1 SV=3	0	0	5	6	0	3	0.919593
Q9CQU5_K180	Zwint	ISAEVK*R	ZWINT_MOUSE ZW10 interactor OS=Mus musculus OX=10090 GN=Zwint PE=1 SV=1	0	0	0	0	0	1	1.28205
Q9CQV8_K11	Ywhab	SELVQK*AK	1433B_MOUSE 14-3-3 protein beta/alpha OS=Mus musculus OX=10090 GN=Ywhab PE=1 SV=3	0	0	1	6	6	6	1.05413
Q9CQV8_K70	Ywhab	VISSIEQK*TER	1433B_MOUSE 14-3-3 protein beta/alpha OS=Mus musculus OX=10090 GN=Ywhab PE=1 SV=3	0	0	0	4	0	6	0.995036
Q9CQV8_K77	Ywhab	K*QQMGK	1433B_MOUSE 14-3-3 protein beta/alpha OS=Mus musculus OX=10090 GN=Ywhab PE=1 SV=3	0	0	1	0	0	0	0.89286
Q9CQW9_K24	Ifitm3	IK*EEYEVAEMGAPHGSASVR	IFM3_MOUSE Interferon-induced transmembrane protein 3 OS=Mus musculus OX=10090 GN=Ifitm3 PE=1 SV=1	0	0	0	0	0	1	0.88496
Q9CR09_K162	Ufc1	GVIQHK*EK	UFC1_MOUSE Ubiquitin-fold modifier-conjugating enzyme 1 OS=Mus musculus OX=10090 GN=Ufc1 PE=1 SV=1	0	0	0	0	3	0	0.93462
Q9CR16_K14	Ppid	PSNSK*NPR	PPID_MOUSE Peptidyl-prolyl cis-trans isomerase D OS=Mus musculus OX=10090 GN=Ppid PE=1 SV=3	0	0	0	0	0	2	0.75572
Q9CR16_K257	Ppid	YVDSSK*AVIEK	PPID_MOUSE Peptidyl-prolyl cis-trans isomerase D OS=Mus musculus OX=10090 GN=Ppid PE=1 SV=3	0	0	0	0	2	4	1.05252
Q9CR16_K262	Ppid	AVIEK*ADR	PPID_MOUSE Peptidyl-prolyl cis-trans isomerase D OS=Mus musculus OX=10090 GN=Ppid PE=1 SV=3	0	0	0	0	0	1	1.08696
Q9CR16_K313	Ppid	K*AQGWQGLK	PPID_MOUSE Peptidyl-prolyl cis-trans isomerase D OS=Mus musculus OX=10090 GN=Ppid PE=1 SV=3	0	0	0	0	1	0	1.03093
Q9CR16_K332	Ppid	K*AQEIAPGDK	PPID_MOUSE Peptidyl-prolyl cis-trans isomerase D OS=Mus musculus OX=10090 GN=Ppid PE=1 SV=3	0	0	0	1	0	1	1.13336
Q9CR16_K351	Ppid	VK*QMIK	PPID_MOUSE Peptidyl-prolyl cis-trans isomerase D OS=Mus musculus OX=10090 GN=Ppid PE=1 SV=3	0	0	0	0	3	0	0.954193
Q9CR57_K137	Rpl14	AAILK*ASPK	RL14_MOUSE 60S ribosomal protein L14 OS=Mus musculus OX=10090 GN=Rpl14 PE=1 SV=3	0	0	0	0	0	1	1.28205
Q9CR57_K160	Rpl14	AAIAAAAAAAAAK*AK	RL14_MOUSE 60S ribosomal protein L14 OS=Mus musculus OX=10090 GN=Rpl14 PE=1 SV=3	0	0	0	2	0	0	0.91647
Q9CR57_K167	Rpl14	K*ATGPGK	RL14_MOUSE 60S ribosomal protein L14 OS=Mus musculus OX=10090 GN=Rpl14 PE=1 SV=3	0	0	2	5	0	2	0.996034
Q9CR57_K173	Rpl14	ATGPGK*K	RL14_MOUSE 60S ribosomal protein L14 OS=Mus musculus OX=10090 GN=Rpl14 PE=1 SV=3	0	0	0	2	0	0	0.99488
Q9CR57_K179	Rpl14	AAGQK*APAQK	RL14_MOUSE 60S ribosomal protein L14 OS=Mus musculus OX=10090 GN=Rpl14 PE=1 SV=3	0	0	2	5	0	4	1.25155
Q9CR57_K184	Rpl14	APAQK*AAGQK	RL14_MOUSE 60S ribosomal protein L14 OS=Mus musculus OX=10090 GN=Rpl14 PE=1 SV=3	0	2	6	6	4	5	1.08731
Q9CR57_K189	Rpl14	AAGQK*AAPPAK	RL14_MOUSE 60S ribosomal protein L14 OS=Mus musculus OX=10090 GN=Rpl14 PE=1 SV=3	0	0	2	2	1	2	1.01519
Q9CR57_K201	Rpl14	GQK*TPAQK	RL14_MOUSE 60S ribosomal protein L14 OS=Mus musculus OX=10090 GN=Rpl14 PE=1 SV=3	0	0	0	3	0	2	1.19326
Q9CR57_K206	Rpl14	TPAQK*APAPK	RL14_MOUSE 60S ribosomal protein L14 OS=Mus musculus OX=10090 GN=Rpl14 PE=1 SV=3	0	0	3	2	6	4	1.0248
Q9CR57_K211	Rpl14	APAPK*AAGK	RL14_MOUSE 60S ribosomal protein L14 OS=Mus musculus OX=10090 GN=Rpl14 PE=1 SV=3	0	0	0	5	3	4	1.10462
Q9CSN1_K339	Snw1	AGIK*THVEK	SNW1_MOUSE SNW domain-containing protein 1 OS=Mus musculus OX=10090 GN=Snw1 PE=1 SV=3	0	0	0	0	1	0	1.23457
Q9CSU0_K73	Rprd1b	K*GPEFTR	RPR1B_MOUSE Regulation of nuclear pre-mRNA domain-containing protein 1B OS=Mus musculus OX=10090 GN=Rprd1b PE=1 SV=2	0	0	0	0	0	1	1.42857
Q9CU65_K739	Zmym2	GATK*ELDGVVR	ZMYM2_MOUSE Zinc finger MYM-type protein 2 OS=Mus musculus OX=10090 GN=Zmym2 PE=1 SV=3	0	0	0	0	0	1	1.0101
Q9CW46_K196	Raver1	SDLLGK*PLGPR	RAVR1_MOUSE Ribonucleoprotein PTB-binding 1 OS=Mus musculus OX=10090 GN=Raver1 PE=1 SV=2	0	0	0	0	0	4	1.00365
Q9CW46_K707	Raver1	TPLGGQK*R	RAVR1_MOUSE Ribonucleoprotein PTB-binding 1 OS=Mus musculus OX=10090 GN=Raver1 PE=1 SV=2	0	0	0	0	0	1	1.08989
Q9CWK8_K447	Snx2	IQQAK*NEIR	SNX2_MOUSE Sorting nexin-2 OS=Mus musculus OX=10090 GN=Snx2 PE=1 SV=2	0	0	0	0	3	3	0.974875
Q9CWL8_K463	Ctnnbl1	IEGEK*HDIVR	CTBL1_MOUSE Beta-catenin-like protein 1 OS=Mus musculus OX=10090 GN=Ctnnbl1 PE=1 SV=1	0	0	0	0	2	0	1.20861
Q9CWM4_K26	Pfdn1	VIDTQQK*VK	PFD1_MOUSE Prefoldin subunit 1 OS=Mus musculus OX=10090 GN=Pfdn1 PE=1 SV=1	0	0	0	0	0	1	1.0101
Q9CWM4_K28	Pfdn1	VK*LADIQIEQLNR	PFD1_MOUSE Prefoldin subunit 1 OS=Mus musculus OX=10090 GN=Pfdn1 PE=1 SV=1	0	0	3	0	0	0	0.988967
Q9CWS0_K100	Ddah1	K*EVDMMK	DDAH1_MOUSE N(G),N(G)-dimethylarginine dimethylaminohydrolase 1 OS=Mus musculus OX=10090 GN=Ddah1 PE=1 SV=3	0	0	0	0	2	0	1.01907
Q9CX48_K13	Zcchc10	K*AEANK	ZCH10_MOUSE Zinc finger CCHC domain-containing protein 10 OS=Mus musculus OX=10090 GN=Zcchc10 PE=2 SV=1	0	0	0	1	1	0	0.934785
Q9CX86_K133	Hnrnpa0	AEIIADK*QSGK	ROA0_MOUSE Heterogeneous nuclear ribonucleoprotein A0 OS=Mus musculus OX=10090 GN=Hnrnpa0 PE=1 SV=1	0	0	0	0	2	1	1.01224
Q9CX86_K176	Hnrnpa0	AVPK*EDIHAGGGGAR	ROA0_MOUSE Heterogeneous nuclear ribonucleoprotein A0 OS=Mus musculus OX=10090 GN=Hnrnpa0 PE=1 SV=1	0	0	0	0	3	6	1.04601
Q9CX86_K96	Hnrnpa0	PGAHAK*VK	ROA0_MOUSE Heterogeneous nuclear ribonucleoprotein A0 OS=Mus musculus OX=10090 GN=Hnrnpa0 PE=1 SV=1	0	0	0	0	1	3	0.974448
Q9CXW3_K21	Cacybp	VLLEK*STR	CYBP_MOUSE Calcyclin-binding protein OS=Mus musculus OX=10090 GN=Cacybp PE=1 SV=1	0	0	0	0	4	5	1.0342
Q9CXW3_K35	Cacybp	DTLTSEK*SK	CYBP_MOUSE Calcyclin-binding protein OS=Mus musculus OX=10090 GN=Cacybp PE=1 SV=1	0	0	0	1	0	4	1.05135
Q9CXW3_K43	Cacybp	IETELK*NK	CYBP_MOUSE Calcyclin-binding protein OS=Mus musculus OX=10090 GN=Cacybp PE=1 SV=1	0	0	0	0	0	3	1.09749
Q9CXW3_K49	Cacybp	MQQK*SQK	CYBP_MOUSE Calcyclin-binding protein OS=Mus musculus OX=10090 GN=Cacybp PE=1 SV=1	0	0	0	3	0	0	1.00532
Q9CXW4_K154	Rpl11	TGCIGAK*HR	RL11_MOUSE 60S ribosomal protein L11 OS=Mus musculus OX=10090 GN=Rpl11 PE=1 SV=4	0	0	0	0	3	0	1.0237
Q9CXW4_K38	Rpl11	AAK*VLEQLTGQTPVFSK	RL11_MOUSE 60S ribosomal protein L11 OS=Mus musculus OX=10090 GN=Rpl11 PE=1 SV=4	0	0	4	3	2	2	1.03305
Q9CXW4_K78	Rpl11	GAK*AEEILEK	RL11_MOUSE 60S ribosomal protein L11 OS=Mus musculus OX=10090 GN=Rpl11 PE=1 SV=4	0	0	0	0	2	1	0.97702
Q9CXW4_K85	Rpl11	AEEILEK*GLK	RL11_MOUSE 60S ribosomal protein L11 OS=Mus musculus OX=10090 GN=Rpl11 PE=1 SV=4	0	0	1	5	6	5	1.05914
Q9CY27_K16	Tecr	EK*LCFLDK	TECR_MOUSE Very-long-chain enoyl-CoA reductase OS=Mus musculus OX=10090 GN=Tecr PE=1 SV=1	0	0	0	0	0	4	0.93607
Q9CY27_K2	Tecr	MK*HYEVEIR	TECR_MOUSE Very-long-chain enoyl-CoA reductase OS=Mus musculus OX=10090 GN=Tecr PE=1 SV=1	0	0	0	0	1	0	0.86207
Q9CY58_K122	Serbp1	RPDQQLQGDGK*LIDR	PAIRB_MOUSE Plasminogen activator inhibitor 1 RNA-binding protein OS=Mus musculus OX=10090 GN=Serbp1 PE=1 SV=2	0	0	0	0	0	1	1.07527
Q9CY58_K298	Serbp1	AIQNK*DR	PAIRB_MOUSE Plasminogen activator inhibitor 1 RNA-binding protein OS=Mus musculus OX=10090 GN=Serbp1 PE=1 SV=2	0	0	0	4	2	5	1.10459
Q9CY58_K319	Serbp1	KPNEGADGQWK*K	PAIRB_MOUSE Plasminogen activator inhibitor 1 RNA-binding protein OS=Mus musculus OX=10090 GN=Serbp1 PE=1 SV=2	0	0	1	0	1	0	0.89775
Q9CY58_K320	Serbp1	K*GFVLHK	PAIRB_MOUSE Plasminogen activator inhibitor 1 RNA-binding protein OS=Mus musculus OX=10090 GN=Serbp1 PE=1 SV=2	0	0	0	4	1	1	0.956657
Q9CY58_K37	Serbp1	AAENK*K	PAIRB_MOUSE Plasminogen activator inhibitor 1 RNA-binding protein OS=Mus musculus OX=10090 GN=Serbp1 PE=1 SV=2	0	0	0	1	0	0	0.97087
Q9CY58_K39	Serbp1	K*EAGGGGVGGPGAK	PAIRB_MOUSE Plasminogen activator inhibitor 1 RNA-binding protein OS=Mus musculus OX=10090 GN=Serbp1 PE=1 SV=2	0	0	1	0	0	1	1.18593
Q9CY58_K68	Serbp1	SAAQAAAQTNSNAAGK*QLR	PAIRB_MOUSE Plasminogen activator inhibitor 1 RNA-binding protein OS=Mus musculus OX=10090 GN=Serbp1 PE=1 SV=2	0	0	1	1	0	0	1.10648
Q9CY64_K142	Blvra	EVAGK*ELLK	BIEA_MOUSE Biliverdin reductase A OS=Mus musculus OX=10090 GN=Blvra PE=1 SV=1	0	0	0	0	1	0	0.75758
Q9CY64_K146	Blvra	ELLK*GSLR	BIEA_MOUSE Biliverdin reductase A OS=Mus musculus OX=10090 GN=Blvra PE=1 SV=1	0	0	0	0	0	3	1.11261
Q9CYH6_K20	Rrs1	AEQEEAEK*LQR	RRS1_MOUSE Ribosome biogenesis regulatory protein homolog OS=Mus musculus OX=10090 GN=Rrs1 PE=1 SV=1	0	0	0	0	0	1	1.25
Q9CYN2_K71	Spcs2	VLLEK*YK	SPCS2_MOUSE Signal peptidase complex subunit 2 OS=Mus musculus OX=10090 GN=Spcs2 PE=1 SV=1	0	0	0	0	2	0	1.21172
Q9CYX7_K149	Rrp15	VK*PDVVK	RRP15_MOUSE RRP15-like protein OS=Mus musculus OX=10090 GN=Rrp15 PE=1 SV=2	0	0	0	0	2	0	1.02489
Q9CYZ2_K70	Tpd52l2	QVLAAK*ER	TPD54_MOUSE Tumor protein D54 OS=Mus musculus OX=10090 GN=Tpd52l2 PE=1 SV=1	0	0	0	0	0	1	1.05263
Q9CZD3_K194	Gars1	FADFMVK*DVK	GARS_MOUSE Glycine--tRNA ligase OS=Mus musculus OX=10090 GN=Gars1 PE=1 SV=1	0	0	0	1	4	2	1.19261
Q9CZD3_K225	Gars1	CSAEK*K	GARS_MOUSE Glycine--tRNA ligase OS=Mus musculus OX=10090 GN=Gars1 PE=1 SV=1	0	0	0	0	4	0	0.96581
Q9CZD3_K636	Gars1	NGVSHK*VDDSSGSIGR	GARS_MOUSE Glycine--tRNA ligase OS=Mus musculus OX=10090 GN=Gars1 PE=1 SV=1	0	0	0	0	4	2	1.07348
Q9CZD3_K89	Gars1	AVAELK*AR	GARS_MOUSE Glycine--tRNA ligase OS=Mus musculus OX=10090 GN=Gars1 PE=1 SV=1	0	0	0	3	1	6	1.01017
Q9CZD3_K98	Gars1	VLEAK*ELALQPK	GARS_MOUSE Glycine--tRNA ligase OS=Mus musculus OX=10090 GN=Gars1 PE=1 SV=1	0	0	4	6	4	5	1.13516
Q9CZN7_K103	Shmt2	YSEGYPGK*R	GLYM_MOUSE Serine hydroxymethyltransferase, mitochondrial OS=Mus musculus OX=10090 GN=Shmt2 PE=1 SV=1	0	0	0	0	0	3	0.95059
Q9CZN7_K269	Shmt2	VIPSPFK*YADVVTTTTHK	GLYM_MOUSE Serine hydroxymethyltransferase, mitochondrial OS=Mus musculus OX=10090 GN=Shmt2 PE=1 SV=1	0	0	3	0	0	2	0.99879
Q9CZN7_K302	Shmt2	TVDPK*TGK	GLYM_MOUSE Serine hydroxymethyltransferase, mitochondrial OS=Mus musculus OX=10090 GN=Shmt2 PE=1 SV=1	0	0	0	2	1	6	1.10871
[truncated: 306 more rows]
