# Supplementary material for: A Paal–Knorr agent for chemoproteomic profiling of targets of isoketals in cells
Source: Chem Sci. 2021 Oct 15;12(43):14557–63. doi: 10.1039/d1sc02230j (PMC8580055; doi:10.1039/d1sc02230j)
Supplement: SC-012-D1SC02230J-s004 [file SC-012-D1SC02230J-s004.xlsx]

## Sheet: ONAyne_200μM_200μM_Lysates
Identifier	Genename	Modified sequences	Description	△273	△289	△305	△287	△285	△301	ONAyne_200μM_200μM (in vitro)
P13639_K598	EEF2	SPNK*HNR	EF2_HUMAN Elongation factor 2 OS=Homo sapiens OX=9606 GN=EEF2 PE=1 SV=4	2	0	0	2	2	2	0.77982
P62269_K137	RPS18	GQHTK*TTGR	RS18_HUMAN 40S ribosomal protein S18 OS=Homo sapiens OX=9606 GN=RPS18 PE=1 SV=3	2	0	2	2	1	1	1.01128
P09429_K165	HMGB1	AK*GKPDAAK	HMGB1_HUMAN High mobility group protein B1 OS=Homo sapiens OX=9606 GN=HMGB1 PE=1 SV=3	2	0	0	2	0	0	0.870032
O00541_K570	PES1	K*AHDEAVR	PESC_HUMAN Pescadillo homolog OS=Homo sapiens OX=9606 GN=PES1 PE=1 SV=1	2	0	0	0	0	0	0.761145
P16104_K37	H2AX	K*GHYAER	H2AX_HUMAN Histone H2AX OS=Homo sapiens OX=9606 GN=H2AX PE=1 SV=2	2	0	2	2	0	1	0.94167
P07910_K184	HNRNPC	GSSK*SGK	HNRPC_HUMAN Heterogeneous nuclear ribonucleoproteins C1/C2 OS=Homo sapiens OX=9606 GN=HNRNPC PE=1 SV=4	2	0	0	2	0	1	0.842512
P14618_K247	PKM	K*ASDVHEVR	KPYM_HUMAN Pyruvate kinase PKM OS=Homo sapiens OX=9606 GN=PKM PE=1 SV=4	2	0	1	2	0	0	0.906212
P62258_K125	YWHAE	MK*GDYHR	1433E_HUMAN 14-3-3 protein epsilon OS=Homo sapiens OX=9606 GN=YWHAE PE=1 SV=1	2	0	0	0	0	0	0.98391
Q13813_K296	SPTAN1	K*HEGLER	SPTN1_HUMAN Spectrin alpha chain, non-erythrocytic 1 OS=Homo sapiens OX=9606 GN=SPTAN1 PE=1 SV=3	2	0	0	1	0	0	1.02557
P11142_K251	HSPA8	K*DISENKR	HSP7C_HUMAN Heat shock cognate 71 kDa protein OS=Homo sapiens OX=9606 GN=HSPA8 PE=1 SV=1	2	0	1	0	0	0	1.01675
P0C0S5_K8	H2AZ1	AGK*DSGK	H2AZ_HUMAN Histone H2A.Z OS=Homo sapiens OX=9606 GN=H2AZ1 PE=1 SV=2	2	0	0	2	0	0	0.802915
Q12931_K324	TRAP1	YVAQAHDK*PR	TRAP1_HUMAN Heat shock protein 75 kDa, mitochondrial OS=Homo sapiens OX=9606 GN=TRAP1 PE=1 SV=3	2	0	0	0	2	0	1.05649
P37802_K40	TAGLN2	K*DVGRPQPGR	TAGL2_HUMAN Transgelin-2 OS=Homo sapiens OX=9606 GN=TAGLN2 PE=1 SV=3	2	0	0	0	0	0	0.90977
P46782_K201	RPS5	VAK*SNR	RS5_HUMAN 40S ribosomal protein S5 OS=Homo sapiens OX=9606 GN=RPS5 PE=1 SV=4	2	2	0	2	0	2	3.28321
P36578_K120	RPL4	VNTTQK*R	RL4_HUMAN 60S ribosomal protein L4 OS=Homo sapiens OX=9606 GN=RPL4 PE=1 SV=5	2	0	0	2	0	1	0.83376
P62913_K154	RPL11	TGCIGAK*HR	RL11_HUMAN 60S ribosomal protein L11 OS=Homo sapiens OX=9606 GN=RPL11 PE=1 SV=2	2	0	0	0	2	0	0.99742
Q00839_K181	HNRNPU	GAAK*EAAGK	HNRPU_HUMAN Heterogeneous nuclear ribonucleoprotein U OS=Homo sapiens OX=9606 GN=HNRNPU PE=1 SV=6	2	0	2	1	2	2	0.91608
P78371_K135	CCT2	EATK*AAR	TCPB_HUMAN T-complex protein 1 subunit beta OS=Homo sapiens OX=9606 GN=CCT2 PE=1 SV=4	2	0	0	1	0	0	0.958237
P38646_K654	HSPA9	K*MASER	GRP75_HUMAN Stress-70 protein, mitochondrial OS=Homo sapiens OX=9606 GN=HSPA9 PE=1 SV=2	2	0	0	0	0	0	0.97835
P14314_K180	PRKCSH	TVK*EEAEKPER	GLU2B_HUMAN Glucosidase 2 subunit beta OS=Homo sapiens OX=9606 GN=PRKCSH PE=1 SV=2	2	0	0	0	0	0	0.860285
Q13263_K199	TRIM28	STGPAK*SR	TIF1B_HUMAN Transcription intermediary factor 1-beta OS=Homo sapiens OX=9606 GN=TRIM28 PE=1 SV=5	2	0	0	2	0	0	1.27691
P06748_K236	NPM1	TPK*TPK	NPM_HUMAN Nucleophosmin OS=Homo sapiens OX=9606 GN=NPM1 PE=1 SV=2	2	0	0	2	0	2	0.987408
P63104_K75	YWHAZ	K*QQMAR	1433Z_HUMAN 14-3-3 protein zeta/delta OS=Homo sapiens OX=9606 GN=YWHAZ PE=1 SV=1	2	0	1	2	0	0	0.871116
P22626_K17	HNRNPA2B1	EK*EQFRK	ROA2_HUMAN Heterogeneous nuclear ribonucleoproteins A2/B1 OS=Homo sapiens OX=9606 GN=HNRNPA2B1 PE=1 SV=2	2	0	0	2	0	0	0.840882
P09874_K87	PARP1	K*TAEAGGVTGK	PARP1_HUMAN Poly [ADP-ribose] polymerase 1 OS=Homo sapiens OX=9606 GN=PARP1 PE=1 SV=4	2	0	2	2	0	0	1.02012
P06748_K202	NPM1	DTPAK*NAQK	NPM_HUMAN Nucleophosmin OS=Homo sapiens OX=9606 GN=NPM1 PE=1 SV=2	2	0	0	2	1	0	0.917558
P30101_K466	PDIA3	K*YEGGR	PDIA3_HUMAN Protein disulfide-isomerase A3 OS=Homo sapiens OX=9606 GN=PDIA3 PE=1 SV=4	2	0	0	0	0	0	1.16289
P19338_K95	NCL	AAATPAK*K	NUCL_HUMAN Nucleolin OS=Homo sapiens OX=9606 GN=NCL PE=1 SV=3	2	0	0	0	0	0	0.889
P09651_K105	HNRNPA1	EDSQRPGAHLTVK*K	ROA1_HUMAN Heterogeneous nuclear ribonucleoprotein A1 OS=Homo sapiens OX=9606 GN=HNRNPA1 PE=1 SV=5	2	0	1	0	0	0	1.01108
Q15233_K249	NONO	NQQFHK*ER	NONO_HUMAN Non-POU domain-containing octamer-binding protein OS=Homo sapiens OX=9606 GN=NONO PE=1 SV=4	2	1	2	2	2	2	0.788887
P06748_K215	NPM1	DSK*PSSTPR	NPM_HUMAN Nucleophosmin OS=Homo sapiens OX=9606 GN=NPM1 PE=1 SV=2	2	0	1	0	0	0	1.04054
P39019_K97	RPS19	GSK*SVAR	RS19_HUMAN 40S ribosomal protein S19 OS=Homo sapiens OX=9606 GN=RPS19 PE=1 SV=2	2	0	0	2	0	0	0.744528
P08670_K313	VIM	QAK*QESTEYR	VIME_HUMAN Vimentin OS=Homo sapiens OX=9606 GN=VIM PE=1 SV=4	2	0	2	2	0	1	1.12259
P22626_K104	HNRNPA2B1	EESGK*PGAHVTVK	ROA2_HUMAN Heterogeneous nuclear ribonucleoproteins A2/B1 OS=Homo sapiens OX=9606 GN=HNRNPA2B1 PE=1 SV=2	2	0	2	0	2	2	0.911681
P62701_K37	RPS4X	PSTGPHK*LR	RS4X_HUMAN 40S ribosomal protein S4, X isoform OS=Homo sapiens OX=9606 GN=RPS4X PE=1 SV=2	2	0	0	0	0	1	0.862867
P38646_K625	HSPA9	K*DSETGENIR	GRP75_HUMAN Stress-70 protein, mitochondrial OS=Homo sapiens OX=9606 GN=HSPA9 PE=1 SV=2	2	0	2	1	0	1	1.04427
Q9H9B4_K49	SFXN1	K*IVHDYR	SFXN1_HUMAN Sideroflexin-1 OS=Homo sapiens OX=9606 GN=SFXN1 PE=1 SV=4	2	0	0	0	0	0	1.21331
P49588_K338	AARS1	YAHEK*LNASR	SYAC_HUMAN Alanine--tRNA ligase, cytoplasmic OS=Homo sapiens OX=9606 GN=AARS1 PE=1 SV=2	2	0	1	1	0	0	1.06367
P18669_K251	PGAM1	AMEAVAAQGK*AK	PGAM1_HUMAN Phosphoglycerate mutase 1 OS=Homo sapiens OX=9606 GN=PGAM1 PE=1 SV=2	2	0	1	2	0	2	0.897269
P22626_K59	HNRNPA2B1	DPASK*R	ROA2_HUMAN Heterogeneous nuclear ribonucleoproteins A2/B1 OS=Homo sapiens OX=9606 GN=HNRNPA2B1 PE=1 SV=2	2	0	0	1	0	0	1.42817
P04406_K251	GAPDH	LEK*PAKYDDIKK LEK*PAKYDDIK	G3P_HUMAN Glyceraldehyde-3-phosphate dehydrogenase OS=Homo sapiens OX=9606 GN=GAPDH PE=1 SV=3	2	0	2	0	0	0	0.87785
P22234_K304	PAICS	VTSAHK*GPDETLR	PUR6_HUMAN Multifunctional protein ADE2 OS=Homo sapiens OX=9606 GN=PAICS PE=1 SV=3	2	0	2	1	2	2	0.925211
Q07955_K174	SRSF1	K*LDNTK	SRSF1_HUMAN Serine/arginine-rich splicing factor 1 OS=Homo sapiens OX=9606 GN=SRSF1 PE=1 SV=2	2	0	0	0	0	0	0.98596
O75683_K124	SURF6	LHEK*IQEAR	SURF6_HUMAN Surfeit locus protein 6 OS=Homo sapiens OX=9606 GN=SURF6 PE=1 SV=3	2	0	1	2	0	0	0.926428
Q8NC51_K299	SERBP1	AIQNK*DR	PAIRB_HUMAN Plasminogen activator inhibitor 1 RNA-binding protein OS=Homo sapiens OX=9606 GN=SERBP1 PE=1 SV=2	2	0	0	2	0	0	0.968385
Q15233_K336	NONO	MEELHNQEVQK*R	NONO_HUMAN Non-POU domain-containing octamer-binding protein OS=Homo sapiens OX=9606 GN=NONO PE=1 SV=4	2	0	2	2	1	1	0.835087
P06748_K150	NPM1	SAPGGGSK*VPQK	NPM_HUMAN Nucleophosmin OS=Homo sapiens OX=9606 GN=NPM1 PE=1 SV=2	2	0	0	2	1	1	0.84163
P09651_K8	HNRNPA1	SESPK*EPEQLRK	ROA1_HUMAN Heterogeneous nuclear ribonucleoprotein A1 OS=Homo sapiens OX=9606 GN=HNRNPA1 PE=1 SV=5	2	0	2	0	0	0	0.979448
P11142_K535	HSPA8	DK*VSSK	HSP7C_HUMAN Heat shock cognate 71 kDa protein OS=Homo sapiens OX=9606 GN=HSPA8 PE=1 SV=1	2	0	0	0	0	0	1.1982
P50991_K21	CCT4	GK*GAYQDR	TCPD_HUMAN T-complex protein 1 subunit delta OS=Homo sapiens OX=9606 GN=CCT4 PE=1 SV=4	2	0	2	2	0	0	0.931567
Q14978_K246	NOLC1	K*QVVAK	NOLC1_HUMAN Nucleolar and coiled-body phosphoprotein 1 OS=Homo sapiens OX=9606 GN=NOLC1 PE=1 SV=2	2	0	0	0	0	0	1.03964
P62753_K175	RPS6	APK*IQR	RS6_HUMAN 40S ribosomal protein S6 OS=Homo sapiens OX=9606 GN=RPS6 PE=1 SV=1	2	0	0	1	0	0	0.862973
P58876_K6	H2BC5	PEPTK*SAPAPK	H2B1D_HUMAN Histone H2B type 1-D OS=Homo sapiens OX=9606 GN=H2BC5 PE=1 SV=2	2	0	2	2	2	2	0.833034
P31948_K50	STIP1	SAAYAK*K	STIP1_HUMAN Stress-induced-phosphoprotein 1 OS=Homo sapiens OX=9606 GN=STIP1 PE=1 SV=1	2	0	0	2	0	0	0.966943
P39019_K143	RPS19	IAGQVAAANK*K	RS19_HUMAN 40S ribosomal protein S19 OS=Homo sapiens OX=9606 GN=RPS19 PE=1 SV=2	2	0	0	2	0	0	0.830963
Q14978_K62	NOLC1	SAK*VPER	NOLC1_HUMAN Nucleolar and coiled-body phosphoprotein 1 OS=Homo sapiens OX=9606 GN=NOLC1 PE=1 SV=2	2	0	0	2	0	0	1.04991
P39019_K122	RPS19	K*LTPQGQR	RS19_HUMAN 40S ribosomal protein S19 OS=Homo sapiens OX=9606 GN=RPS19 PE=1 SV=2	2	0	0	1	0	1	0.81811
Q07955_K193	SRSF1	VK*VDGPR	SRSF1_HUMAN Serine/arginine-rich splicing factor 1 OS=Homo sapiens OX=9606 GN=SRSF1 PE=1 SV=2	2	0	2	2	0	1	0.963751
Q5VTE0_K386	EEF1A1P5	K*LEDGPK	EF1A3_HUMAN Putative elongation factor 1-alpha-like 3 OS=Homo sapiens OX=9606 GN=EEF1A1P5 PE=5 SV=1	2	0	2	2	2	2	0.902226
P84103_K85	SRSF3	VRVELSNGEK*R VELSNGEK*R	SRSF3_HUMAN Serine/arginine-rich splicing factor 3 OS=Homo sapiens OX=9606 GN=SRSF3 PE=1 SV=1	2	0	0	2	1	1	0.935755
P42766_K35	RPL35	VAK*VTGGAASK	RL35_HUMAN 60S ribosomal protein L35 OS=Homo sapiens OX=9606 GN=RPL35 PE=1 SV=2	2	0	0	0	0	0	0.87097
P60468_K20	SEC61B	SPSK*AVAAR	SC61B_HUMAN Protein transport protein Sec61 subunit beta OS=Homo sapiens OX=9606 GN=SEC61B PE=1 SV=2	2	0	0	0	0	0	0.96439
P06733_K60	ENO1	YMGK*GVSK	ENOA_HUMAN Alpha-enolase OS=Homo sapiens OX=9606 GN=ENO1 PE=1 SV=2	2	0	0	2	0	0	0.806255
P19338_K125	NCL	K*GAAIPAK	NUCL_HUMAN Nucleolin OS=Homo sapiens OX=9606 GN=NCL PE=1 SV=3	2	0	0	1	0	0	1.15228
Q8NE71_K430	ABCF1	ATGAAAAEAK*AR	ABCF1_HUMAN ATP-binding cassette sub-family F member 1 OS=Homo sapiens OX=9606 GN=ABCF1 PE=1 SV=2	2	0	0	2	0	1	0.9652
P83731_K97	RPL24	NQK*PEVR	RL24_HUMAN 60S ribosomal protein L24 OS=Homo sapiens OX=9606 GN=RPL24 PE=1 SV=1	2	0	0	0	0	0	0.83673
P19338_K71	NCL	K*VAVATPAK	NUCL_HUMAN Nucleolin OS=Homo sapiens OX=9606 GN=NCL PE=1 SV=3	2	0	0	0	0	0	0.955715
P62753_K230	RPS6	QEQIAK*R	RS6_HUMAN 40S ribosomal protein S6 OS=Homo sapiens OX=9606 GN=RPS6 PE=1 SV=1	2	0	0	2	0	0	1.02535
P62917_K144	RPL8	ASGNYATVISHNPETK*K	RL8_HUMAN 60S ribosomal protein L8 OS=Homo sapiens OX=9606 GN=RPL8 PE=1 SV=2	2	0	0	0	0	1	0.874477
Q92841_K592	DDX17	GVK*DGGR	DDX17_HUMAN Probable ATP-dependent RNA helicase DDX17 OS=Homo sapiens OX=9606 GN=DDX17 PE=1 SV=2	2	0	0	0	1	2	0.783856
P16949_K53	STMN1	K*LEAAEER	STMN1_HUMAN Stathmin OS=Homo sapiens OX=9606 GN=STMN1 PE=1 SV=3	2	0	2	1	0	1	0.993383
P06733_K199	ENO1	NVIKEK*YGK	ENOA_HUMAN Alpha-enolase OS=Homo sapiens OX=9606 GN=ENO1 PE=1 SV=2	2	0	0	0	0	0	0.902975
Q9UHD9_K38	UBQLN2	VTVK*TPK	UBQL2_HUMAN Ubiquilin-2 OS=Homo sapiens OX=9606 GN=UBQLN2 PE=1 SV=2	2	0	0	2	0	0	0.962725
P00558_K323	PGK1	K*YAEAVTR	PGK1_HUMAN Phosphoglycerate kinase 1 OS=Homo sapiens OX=9606 GN=PGK1 PE=1 SV=3	2	0	1	1	0	0	0.892922
P62266_K108	RPS23	K*GHAVGDIPGVR	RS23_HUMAN 40S ribosomal protein S23 OS=Homo sapiens OX=9606 GN=RPS23 PE=1 SV=3	2	0	0	2	0	0	0.965243
P06733_K197	ENO1	NVIK*EK	ENOA_HUMAN Alpha-enolase OS=Homo sapiens OX=9606 GN=ENO1 PE=1 SV=2	2	0	0	2	0	0	0.934767
P37802_K17	TAGLN2	EVQQK*IEK	TAGL2_HUMAN Transgelin-2 OS=Homo sapiens OX=9606 GN=TAGLN2 PE=1 SV=3	2	0	0	1	0	0	0.97763
P35579_K1212	MYH9	VK*ANLEK	MYH9_HUMAN Myosin-9 OS=Homo sapiens OX=9606 GN=MYH9 PE=1 SV=4	2	0	0	0	0	0	0.976765
P06748_K223	NPM1	SK*GQESFK	NPM_HUMAN Nucleophosmin OS=Homo sapiens OX=9606 GN=NPM1 PE=1 SV=2	2	0	2	2	1	1	0.859274
P46782_K63	RPS5	K*AQCPIVER	RS5_HUMAN 40S ribosomal protein S5 OS=Homo sapiens OX=9606 GN=RPS5 PE=1 SV=4	2	0	2	2	0	0	0.923627
P40926_K105	MDH2	K*PGMTR	MDHM_HUMAN Malate dehydrogenase, mitochondrial OS=Homo sapiens OX=9606 GN=MDH2 PE=1 SV=3	2	0	0	0	0	0	0.925325
P62263_K106	RPS14	TK*TPGPGAQSALR	RS14_HUMAN 40S ribosomal protein S14 OS=Homo sapiens OX=9606 GN=RPS14 PE=1 SV=3	2	0	2	1	1	1	0.883074
P06733_K330	ENO1	IAK*AVNEK	ENOA_HUMAN Alpha-enolase OS=Homo sapiens OX=9606 GN=ENO1 PE=1 SV=2	2	0	2	2	2	2	0.868976
P38646_K106	HSPA9	LVGMPAK*R	GRP75_HUMAN Stress-70 protein, mitochondrial OS=Homo sapiens OX=9606 GN=HSPA9 PE=1 SV=2	2	0	0	2	0	2	1.00851
P62805_K78	H4C1	DAVTYTEHAK*R	H4_HUMAN Histone H4 OS=Homo sapiens OX=9606 GN=H4C1 PE=1 SV=2	2	2	2	2	2	2	0.933662
P13639_K252	EEF2	AKK*VEDMMK K*VEDMMK	EF2_HUMAN Elongation factor 2 OS=Homo sapiens OX=9606 GN=EEF2 PE=1 SV=4	2	0	0	0	0	0	1.26721
P62829_K75	RPL23	K*VHPAVVIR	RL23_HUMAN 60S ribosomal protein L23 OS=Homo sapiens OX=9606 GN=RPL23 PE=1 SV=1	2	0	0	0	0	0	1.05604
Q16629_K185	SRSF7	SGSIK*GSR	SRSF7_HUMAN Serine/arginine-rich splicing factor 7 OS=Homo sapiens OX=9606 GN=SRSF7 PE=1 SV=1	2	0	0	1	0	0	1.14468
P09874_K447	PARP1	KMEEVK*EANIR	PARP1_HUMAN Poly [ADP-ribose] polymerase 1 OS=Homo sapiens OX=9606 GN=PARP1 PE=1 SV=4	2	0	1	1	2	0	0.923695
P12956_K189	XRCC6	TK*AGDLR	XRCC6_HUMAN X-ray repair cross-complementing protein 6 OS=Homo sapiens OX=9606 GN=XRCC6 PE=1 SV=2	2	0	1	2	0	0	0.803388
P38919_K152	EIF4A3	K*LDYGQHVVAGTPGR	IF4A3_HUMAN Eukaryotic initiation factor 4A-III OS=Homo sapiens OX=9606 GN=EIF4A3 PE=1 SV=4	2	0	0	0	0	0	0.702395
P11021_K340	HSPA5	STMK*PVQK	BIP_HUMAN Endoplasmic reticulum chaperone BiP OS=Homo sapiens OX=9606 GN=HSPA5 PE=1 SV=2	2	0	0	2	0	0	1.04564
P0DMV9_K524	HSPA1B	MVQEAEK*YKAEDEVQR	HS71B_HUMAN Heat shock 70 kDa protein 1B OS=Homo sapiens OX=9606 GN=HSPA1B PE=1 SV=1	2	0	0	1	0	1	1.06677
P11142_K257	HSPA8	DISENK*R	HSP7C_HUMAN Heat shock cognate 71 kDa protein OS=Homo sapiens OX=9606 GN=HSPA8 PE=1 SV=1	2	0	0	2	0	0	0.623683
P09429_K90	HMGB1	FK*DPNAPK	HMGB1_HUMAN High mobility group protein B1 OS=Homo sapiens OX=9606 GN=HMGB1 PE=1 SV=3	2	0	0	0	0	0	0.99123
P46781_K11	RPS9	K*TYVTPR	RS9_HUMAN 40S ribosomal protein S9 OS=Homo sapiens OX=9606 GN=RPS9 PE=1 SV=3	2	0	2	2	0	0	0.70403
Q15233_K290	NONO	NIK*EAR	NONO_HUMAN Non-POU domain-containing octamer-binding protein OS=Homo sapiens OX=9606 GN=NONO PE=1 SV=4	2	0	0	2	0	0	0.808063
P61927_K3	RPL37	TK*GTSSFGK	RL37_HUMAN 60S ribosomal protein L37 OS=Homo sapiens OX=9606 GN=RPL37 PE=1 SV=2	2	0	0	0	0	0	0.88384
P62857_K47	RPS28	NVK*GPVR NVK*GPVREGDVLTLLESER	RS28_HUMAN 40S ribosomal protein S28 OS=Homo sapiens OX=9606 GN=RPS28 PE=1 SV=1	2	0	2	2	1	2	0.916223
P61088_K10	UBE2N	IIK*ETQR	UBE2N_HUMAN Ubiquitin-conjugating enzyme E2 N OS=Homo sapiens OX=9606 GN=UBE2N PE=1 SV=1	2	0	0	2	0	0	0.935318
P06748_K27	NPM1	ADK*DYHFK	NPM_HUMAN Nucleophosmin OS=Homo sapiens OX=9606 GN=NPM1 PE=1 SV=2	2	0	0	1	1	0	0.899452
P62424_K259	RPL7A	AK*ELATK	RL7A_HUMAN 60S ribosomal protein L7a OS=Homo sapiens OX=9606 GN=RPL7A PE=1 SV=2	2	0	0	1	0	0	0.925533
O43175_K289	PHGDH	ALVDHENVISCPHLGASTK*EAQSR	SERA_HUMAN D-3-phosphoglycerate dehydrogenase OS=Homo sapiens OX=9606 GN=PHGDH PE=1 SV=4	2	0	0	1	0	0	1.03223
P06748_K32	NPM1	ADKDYHFK*VDNDENEHQLSLR	NPM_HUMAN Nucleophosmin OS=Homo sapiens OX=9606 GN=NPM1 PE=1 SV=2	2	0	2	2	2	2	0.903944
P19338_K477	NCL	GGK*NSTWSGESK	NUCL_HUMAN Nucleolin OS=Homo sapiens OX=9606 GN=NCL PE=1 SV=3	2	0	2	2	1	0	0.889269
P10809_K31	HSPD1	AKDVK*FGADAR	CH60_HUMAN 60 kDa heat shock protein, mitochondrial OS=Homo sapiens OX=9606 GN=HSPD1 PE=1 SV=2	2	0	2	1	0	0	1.01714
P07237_K71	P4HB	LK*AEGSEIR	PDIA1_HUMAN Protein disulfide-isomerase OS=Homo sapiens OX=9606 GN=P4HB PE=1 SV=3	2	0	1	1	0	1	1.00567
P49368_K234	CCT3	YIK*NPR	TCPG_HUMAN T-complex protein 1 subunit gamma OS=Homo sapiens OX=9606 GN=CCT3 PE=1 SV=4	2	0	0	2	0	0	0.769355
P16949_K119	STMN1	EAQMAAK*LER	STMN1_HUMAN Stathmin OS=Homo sapiens OX=9606 GN=STMN1 PE=1 SV=3	2	1	0	2	1	2	0.946797
O15371_K215	EIF3D	SEK*PLR	EIF3D_HUMAN Eukaryotic translation initiation factor 3 subunit D OS=Homo sapiens OX=9606 GN=EIF3D PE=1 SV=1	2	0	0	2	0	0	1.01856
P14625_K630	HSP90B1	AIKDK*IEK ALKDK*IEK	ENPL_HUMAN Endoplasmin OS=Homo sapiens OX=9606 GN=HSP90B1 PE=1 SV=1	2	0	0	0	0	0	1.23261
P19338_K424	NCL	LVSK*DGK	NUCL_HUMAN Nucleolin OS=Homo sapiens OX=9606 GN=NCL PE=1 SV=3	2	0	0	2	0	0	0.966763
P07195_K310	LDHB	LK*DDEVAQLKK	LDHB_HUMAN L-lactate dehydrogenase B chain OS=Homo sapiens OX=9606 GN=LDHB PE=1 SV=2	2	0	0	0	0	1	0.865843
P00338_K76	LDHA	TPK*IVSGK	LDHA_HUMAN L-lactate dehydrogenase A chain OS=Homo sapiens OX=9606 GN=LDHA PE=1 SV=2	2	0	2	2	0	0	0.949885
P04075_K330	ALDOA	AAQEEYVK*R	ALDOA_HUMAN Fructose-bisphosphate aldolase A OS=Homo sapiens OX=9606 GN=ALDOA PE=1 SV=2	2	0	0	2	0	0	0.966848
Q01105_K177	SET	SGK*DLTK	SET_HUMAN Protein SET OS=Homo sapiens OX=9606 GN=SET PE=1 SV=3	2	0	0	2	1	0	0.773054
P19338_K228	NCL	VVPVK*AK	NUCL_HUMAN Nucleolin OS=Homo sapiens OX=9606 GN=NCL PE=1 SV=3	2	0	0	1	0	0	0.91623
P35232_K202	PHB	FVVEK*AEQQKK FVVEK*AEQQK	PHB_HUMAN Prohibitin OS=Homo sapiens OX=9606 GN=PHB PE=1 SV=1	2	0	0	1	0	0	0.91555
P22314_K528	UBA1	LK*SDTAAAAVR	UBA1_HUMAN Ubiquitin-like modifier-activating enzyme 1 OS=Homo sapiens OX=9606 GN=UBA1 PE=1 SV=3	2	0	1	1	0	0	1.25289
P18669_K241	PGAM1	K*AMEAVAAQGK	PGAM1_HUMAN Phosphoglycerate mutase 1 OS=Homo sapiens OX=9606 GN=PGAM1 PE=1 SV=2	2	0	0	0	0	0	0.98553
P06748_K250	NPM1	AK*MQASIEK	NPM_HUMAN Nucleophosmin OS=Homo sapiens OX=9606 GN=NPM1 PE=1 SV=2	2	0	2	2	0	0	0.982693
P62841_K77	RPS15	EAPPMEKPEVVK*THLR	RS15_HUMAN 40S ribosomal protein S15 OS=Homo sapiens OX=9606 GN=RPS15 PE=1 SV=2	2	0	0	0	0	0	1.0618
Q15691_K174	MAPRE1	TAAAPK*AGPGVVR	MARE1_HUMAN Microtubule-associated protein RP/EB family member 1 OS=Homo sapiens OX=9606 GN=MAPRE1 PE=1 SV=3	2	0	0	0	0	0	0.767645
P18077_K95	RPL35A	SNLPAK*AIGHR	RL35A_HUMAN 60S ribosomal protein L35a OS=Homo sapiens OX=9606 GN=RPL35A PE=1 SV=2	2	0	1	1	0	0	1.8286
P13667_K211	PDIA4	K*LAPEYEK	PDIA4_HUMAN Protein disulfide-isomerase A4 OS=Homo sapiens OX=9606 GN=PDIA4 PE=1 SV=2	2	0	0	0	0	0	0.96036
P39023_K5	RPL3	K*FSAPR	RL3_HUMAN 60S ribosomal protein L3 OS=Homo sapiens OX=9606 GN=RPL3 PE=1 SV=2	2	0	0	2	0	0	0.96412
P62917_K181	RPL8	IDKPILK*AGR	RL8_HUMAN 60S ribosomal protein L8 OS=Homo sapiens OX=9606 GN=RPL8 PE=1 SV=2	2	0	0	2	0	0	0.945855
P13639_K275	EEF2	FSK*SATSPEGK	EF2_HUMAN Elongation factor 2 OS=Homo sapiens OX=9606 GN=EEF2 PE=1 SV=4	2	0	2	2	0	1	0.93026
P06748_K229	NPM1	GQESFK*K	NPM_HUMAN Nucleophosmin OS=Homo sapiens OX=9606 GN=NPM1 PE=1 SV=2	2	0	0	2	2	2	0.818794
P38646_K467	HSPA9	NTTIPTK*K	GRP75_HUMAN Stress-70 protein, mitochondrial OS=Homo sapiens OX=9606 GN=HSPA9 PE=1 SV=2	2	0	0	2	0	0	1.16356
P46779_K47	RPL28	K*TVGVEPAADGK	RL28_HUMAN 60S ribosomal protein L28 OS=Homo sapiens OX=9606 GN=RPL28 PE=1 SV=3	2	0	0	0	0	0	0.98644
P05141_K147	SLC25A5	LAADVGK*AGAER	ADT2_HUMAN ADP/ATP translocase 2 OS=Homo sapiens OX=9606 GN=SLC25A5 PE=1 SV=7	2	1	2	2	2	2	0.941052
P61221_K431	ABCE1	QLLHEK*IR	ABCE1_HUMAN ATP-binding cassette sub-family E member 1 OS=Homo sapiens OX=9606 GN=ABCE1 PE=1 SV=1	2	0	0	0	0	0	1.48687
P26038_K538	MSN	K*TANDMIHAENMR	MOES_HUMAN Moesin OS=Homo sapiens OX=9606 GN=MSN PE=1 SV=3	2	0	0	0	0	0	0.82093
P62273_K13	RPS29	K*FGQGSR	RS29_HUMAN 40S ribosomal protein S29 OS=Homo sapiens OX=9606 GN=RPS29 PE=1 SV=2	2	0	1	2	0	0	0.81696
Q15185_K79	PTGES3	K*GESGQSWPR	TEBP_HUMAN Prostaglandin E synthase 3 OS=Homo sapiens OX=9606 GN=PTGES3 PE=1 SV=1	2	0	2	0	0	0	0.934515
P05023_K54	ATP1A1	K*YGTDLSR	AT1A1_HUMAN Sodium/potassium-transporting ATPase subunit alpha-1 OS=Homo sapiens OX=9606 GN=ATP1A1 PE=1 SV=1	2	0	0	0	0	0	0.966385
P0DMV9_K108	HSPA1B	VQVSYK*GETK	HS71B_HUMAN Heat shock 70 kDa protein 1B OS=Homo sapiens OX=9606 GN=HSPA1B PE=1 SV=1	2	0	0	2	0	0	0.891777
P11021_K446	HSPA5	NTVVPTK*K	BIP_HUMAN Endoplasmic reticulum chaperone BiP OS=Homo sapiens OX=9606 GN=HSPA5 PE=1 SV=2	2	0	0	0	0	0	1.28703
P62241_K37	RPS8	YELGRPAANTK*IGPR	RS8_HUMAN 40S ribosomal protein S8 OS=Homo sapiens OX=9606 GN=RPS8 PE=1 SV=2	2	0	2	1	0	2	0.937621
P29401_K497	TKT	VVLK*SK	TKT_HUMAN Transketolase OS=Homo sapiens OX=9606 GN=TKT PE=1 SV=3	2	0	0	1	0	0	1.01565
P04406_K263	GAPDH	VVK*QASEGPLK	G3P_HUMAN Glyceraldehyde-3-phosphate dehydrogenase OS=Homo sapiens OX=9606 GN=GAPDH PE=1 SV=3	2	0	2	2	2	1	0.943641
Q06830_K67	PRDX1	AEEFK*K	PRDX1_HUMAN Peroxiredoxin-1 OS=Homo sapiens OX=9606 GN=PRDX1 PE=1 SV=1	2	0	0	2	2	1	0.930199
P07910_K189	HNRNPC	LK*GDDLQAIKK LK*GDDLQAIK	HNRPC_HUMAN Heterogeneous nuclear ribonucleoproteins C1/C2 OS=Homo sapiens OX=9606 GN=HNRNPC PE=1 SV=4	2	0	1	1	0	0	0.92458
P23246_K472	SFPQ	NPMYQK*ER	SFPQ_HUMAN Splicing factor, proline- and glutamine-rich OS=Homo sapiens OX=9606 GN=SFPQ PE=1 SV=2	2	0	2	2	1	2	0.972134
P61978_K34	HNRNPK	RPAEDMEEEQAFK*R	HNRPK_HUMAN Heterogeneous nuclear ribonucleoprotein K OS=Homo sapiens OX=9606 GN=HNRNPK PE=1 SV=1	2	0	0	1	0	0	0.893223
Q92598_K351	HSPH1	IPAVK*ER	HS105_HUMAN Heat shock protein 105 kDa OS=Homo sapiens OX=9606 GN=HSPH1 PE=1 SV=1	2	0	0	0	0	0	1.23583
P09429_K128	HMGB1	K*LGEMWNNTAADDKQPYEK	HMGB1_HUMAN High mobility group protein B1 OS=Homo sapiens OX=9606 GN=HMGB1 PE=1 SV=3	2	0	1	0	0	0	1.13507
P19338_K102	NCL	TVTPAK*AVTTPGK	NUCL_HUMAN Nucleolin OS=Homo sapiens OX=9606 GN=NCL PE=1 SV=3	2	0	1	2	0	0	0.892758
O60888_K82	CUTA	VAK*EIAR	CUTA_HUMAN Protein CutA OS=Homo sapiens OX=9606 GN=CUTA PE=1 SV=2	2	0	0	0	0	0	0.83805
P62424_K20	RPL7A	VAPAPAVVK*K	RL7A_HUMAN 60S ribosomal protein L7a OS=Homo sapiens OX=9606 GN=RPL7A PE=1 SV=2	2	0	0	1	0	0	0.948277
P24539_K162	ATP5PB	SQQALVQK*R	AT5F1_HUMAN ATP synthase F(0) complex subunit B1, mitochondrial OS=Homo sapiens OX=9606 GN=ATP5PB PE=1 SV=2	2	0	0	2	0	0	1.0011
P11021_K287	HSPA5	AVQK*LR	BIP_HUMAN Endoplasmic reticulum chaperone BiP OS=Homo sapiens OX=9606 GN=HSPA5 PE=1 SV=2	2	0	0	2	1	0	0.858516
P19338_K124	NCL	ALVATPGK*K	NUCL_HUMAN Nucleolin OS=Homo sapiens OX=9606 GN=NCL PE=1 SV=3	2	0	0	2	0	0	0.9963
Q8WUM4_K374	PDCD6IP	K*ADLVNR	PDC6I_HUMAN Programmed cell death 6-interacting protein OS=Homo sapiens OX=9606 GN=PDCD6IP PE=1 SV=1	2	0	1	0	0	0	0.838947
P63096_K17	GNAI1	SK*MIDR	GNAI1_HUMAN Guanine nucleotide-binding protein G(i) subunit alpha-1 OS=Homo sapiens OX=9606 GN=GNAI1 PE=1 SV=2	2	0	0	1	0	0	1.0498
P07900_K446	HSP90AA1	NIK*LGIHEDSQNR	HS90A_HUMAN Heat shock protein HSP 90-alpha OS=Homo sapiens OX=9606 GN=HSP90AA1 PE=1 SV=5	2	0	2	0	0	0	0.90614
O43768_K80	ENSA	NK*QLPSAGPDK	ENSA_HUMAN Alpha-endosulfine OS=Homo sapiens OX=9606 GN=ENSA PE=1 SV=1	2	0	0	0	0	0	1.10272
P62263_K125	RPS14	SGMK*IGR	RS14_HUMAN 40S ribosomal protein S14 OS=Homo sapiens OX=9606 GN=RPS14 PE=1 SV=3	2	0	0	2	2	2	0.84856
P04075_K14	ALDOA	K*ELSDIAHR	ALDOA_HUMAN Fructose-bisphosphate aldolase A OS=Homo sapiens OX=9606 GN=ALDOA PE=1 SV=2	2	0	2	2	2	1	0.866403
P60866_K30	RPS20	NVK*SLEK	RS20_HUMAN 40S ribosomal protein S20 OS=Homo sapiens OX=9606 GN=RPS20 PE=1 SV=1	2	0	0	0	0	0	1.19471
Q15388_K35	TOMM20	SDPNFK*NR	TOM20_HUMAN Mitochondrial import receptor subunit TOM20 homolog OS=Homo sapiens OX=9606 GN=TOMM20 PE=1 SV=1	2	0	0	0	0	0	0.71613
P06733_K420	ENO1	IEEELGSK*AK	ENOA_HUMAN Alpha-enolase OS=Homo sapiens OX=9606 GN=ENO1 PE=1 SV=2	2	2	0	2	1	2	0.891917
P19338_K223	NCL	AAK*VVPVK	NUCL_HUMAN Nucleolin OS=Homo sapiens OX=9606 GN=NCL PE=1 SV=3	2	0	0	2	0	0	0.783625
P06733_K422	ENO1	AK*FAGR	ENOA_HUMAN Alpha-enolase OS=Homo sapiens OX=9606 GN=ENO1 PE=1 SV=2	2	0	0	2	0	2	0.782423
P06733_K233	ENO1	TAIGK*AGYTDK	ENOA_HUMAN Alpha-enolase OS=Homo sapiens OX=9606 GN=ENO1 PE=1 SV=2	2	0	2	2	2	2	0.810867
P23528_K19	CFL1	VFNDMK*VR	COF1_HUMAN Cofilin-1 OS=Homo sapiens OX=9606 GN=CFL1 PE=1 SV=3	2	0	0	2	2	2	0.950386
Q9UMS4_K122	PRPF19	LTK*EVTAAR	PRP19_HUMAN Pre-mRNA-processing factor 19 OS=Homo sapiens OX=9606 GN=PRPF19 PE=1 SV=1	2	0	2	1	0	0	0.803036
P13639_K572	EEF2	K*SDPVVSYR	EF2_HUMAN Elongation factor 2 OS=Homo sapiens OX=9606 GN=EEF2 PE=1 SV=4	2	0	2	2	0	1	0.920653
P06748_K239	NPM1	TPK*GPSSVEDIK	NPM_HUMAN Nucleophosmin OS=Homo sapiens OX=9606 GN=NPM1 PE=1 SV=2	2	0	2	1	0	2	1.08359
P15880_K114	RPS2	IMPVQK*QTR	RS2_HUMAN 40S ribosomal protein S2 OS=Homo sapiens OX=9606 GN=RPS2 PE=1 SV=2	2	0	0	0	0	0	0.970385
P46777_K27	RPL5	EGK*TDYYAR	RL5_HUMAN 60S ribosomal protein L5 OS=Homo sapiens OX=9606 GN=RPL5 PE=1 SV=3	2	0	2	2	0	0	0.722222
O43399_K154	TPD52L2	K*LGDMR	TPD54_HUMAN Tumor protein D54 OS=Homo sapiens OX=9606 GN=TPD52L2 PE=1 SV=2	2	0	0	0	0	0	0.909165
Q99832_K320	CCT7	VPEEDLK*R	TCPH_HUMAN T-complex protein 1 subunit eta OS=Homo sapiens OX=9606 GN=CCT7 PE=1 SV=2	2	0	0	1	0	2	0.81653
P46777_K41	RPL5	LVIQDK*NK	RL5_HUMAN 60S ribosomal protein L5 OS=Homo sapiens OX=9606 GN=RPL5 PE=1 SV=3	2	0	0	2	0	0	0.919605
P09429_K59	HMGB1	EKGK*FEDMAK GK*FEDMAK	HMGB1_HUMAN High mobility group protein B1 OS=Homo sapiens OX=9606 GN=HMGB1 PE=1 SV=3	2	0	2	2	0	2	0.94163
Q02543_K11	RPL18A	EYK*VVGR	RL18A_HUMAN 60S ribosomal protein L18a OS=Homo sapiens OX=9606 GN=RPL18A PE=1 SV=2	2	0	0	2	1	1	1.04944
P26583_K59	HMGB2	SK*FEDMAK	HMGB2_HUMAN High mobility group protein B2 OS=Homo sapiens OX=9606 GN=HMGB2 PE=1 SV=2	2	0	1	2	0	0	0.996488
P62847_K11	RPS24	K*FMTNR	RS24_HUMAN 40S ribosomal protein S24 OS=Homo sapiens OX=9606 GN=RPS24 PE=1 SV=1	2	0	0	0	0	0	0.785
P83731_K77	RPL24	AVK*FQR	RL24_HUMAN 60S ribosomal protein L24 OS=Homo sapiens OX=9606 GN=RPL24 PE=1 SV=1	2	0	0	2	0	0	1.11357
P02545_K270	LMNA	TYSAK*LDNAR	LMNA_HUMAN Prelamin-A/C OS=Homo sapiens OX=9606 GN=LMNA PE=1 SV=1	2	0	0	2	2	0	1.19707
P62847_K37	RPS24	ATVPK*TEIR	RS24_HUMAN 40S ribosomal protein S24 OS=Homo sapiens OX=9606 GN=RPS24 PE=1 SV=1	2	0	0	2	0	0	1.12508
P40926_K329	MDH2	K*GEDFVK	MDHM_HUMAN Malate dehydrogenase, mitochondrial OS=Homo sapiens OX=9606 GN=MDH2 PE=1 SV=3	2	0	1	2	0	0	0.96102
P08238_K438	HSP90AB1	NLK*LGIHEDSTNR	HS90B_HUMAN Heat shock protein HSP 90-beta OS=Homo sapiens OX=9606 GN=HSP90AB1 PE=1 SV=4	2	0	1	1	0	0	1.15163
P52272_K69	HNRNPM	FEPYANPTK*R	HNRPM_HUMAN Heterogeneous nuclear ribonucleoprotein M OS=Homo sapiens OX=9606 GN=HNRNPM PE=1 SV=3	2	0	0	2	0	1	0.892596
P27635_K30	RPL10	GVPDAK*IR	RL10_HUMAN 60S ribosomal protein L10 OS=Homo sapiens OX=9606 GN=RPL10 PE=1 SV=4	2	0	0	2	2	0	0.927852
P07195_K318	LDHB	LKDDEVAQLK*K	LDHB_HUMAN L-lactate dehydrogenase B chain OS=Homo sapiens OX=9606 GN=LDHB PE=1 SV=2	2	0	2	0	0	0	0.927165
P62826_K28	RAN	TTFVK*R	RAN_HUMAN GTP-binding nuclear protein Ran OS=Homo sapiens OX=9606 GN=RAN PE=1 SV=3	2	0	0	1	0	0	0.99646
P23246_K561	SFPQ	K*EMQLR	SFPQ_HUMAN Splicing factor, proline- and glutamine-rich OS=Homo sapiens OX=9606 GN=SFPQ PE=1 SV=2	2	0	1	2	0	0	0.97365
P46783_K53	RPS10	AMQSLK*SR	RS10_HUMAN 40S ribosomal protein S10 OS=Homo sapiens OX=9606 GN=RPS10 PE=1 SV=1	2	0	0	1	0	0	0.770593
P07910_K197	HNRNPC	LKGDDLQAIK*K	HNRPC_HUMAN Heterogeneous nuclear ribonucleoproteins C1/C2 OS=Homo sapiens OX=9606 GN=HNRNPC PE=1 SV=4	2	0	1	1	0	0	1.18088
Q5VTE0_K179	EEF1A1P5	EVSTYIK*K	EF1A3_HUMAN Putative elongation factor 1-alpha-like 3 OS=Homo sapiens OX=9606 GN=EEF1A1P5 PE=5 SV=1	2	0	0	2	0	0	0.958102
P61353_K117	RPL27	VK*FEER	RL27_HUMAN 60S ribosomal protein L27 OS=Homo sapiens OX=9606 GN=RPL27 PE=1 SV=2	2	0	0	1	0	0	0.980993
P26583_K30	HMGB2	K*HPDSSVNFAEFSK	HMGB2_HUMAN High mobility group protein B2 OS=Homo sapiens OX=9606 GN=HMGB2 PE=1 SV=2	2	0	1	1	0	0	0.997137
Q14978_K647	NOLC1	VADNSFDAK*R	NOLC1_HUMAN Nucleolar and coiled-body phosphoprotein 1 OS=Homo sapiens OX=9606 GN=NOLC1 PE=1 SV=2	2	0	0	1	0	0	1.06289
Q9UII2_K49	ATP5IF1	EAGGAFGK*R	ATIF1_HUMAN ATPase inhibitor, mitochondrial OS=Homo sapiens OX=9606 GN=ATP5IF1 PE=1 SV=1	2	0	0	2	2	2	0.905209
P32969_K28	RPL9	TVIVK*GPR	RL9_HUMAN 60S ribosomal protein L9 OS=Homo sapiens OX=9606 GN=RPL9 PE=1 SV=1	2	0	0	1	0	0	0.98997
P62277_K9	RPS13	MHAPGK*GLSQSALPYR	RS13_HUMAN 40S ribosomal protein S13 OS=Homo sapiens OX=9606 GN=RPS13 PE=1 SV=2	2	0	2	2	0	0	0.962018
Q15233_K467	NONO	AAPGAEFAPNK*R	NONO_HUMAN Non-POU domain-containing octamer-binding protein OS=Homo sapiens OX=9606 GN=NONO PE=1 SV=4	2	0	2	2	0	0	0.975597
Q92688_K68	ANP32B	K*LELSENR	AN32B_HUMAN Acidic leucine-rich nuclear phosphoprotein 32 family member B OS=Homo sapiens OX=9606 GN=ANP32B PE=1 SV=1	2	0	0	0	0	0	0.758155
P09429_K30	HMGB1	K*HPDASVNFSEFSK	HMGB1_HUMAN High mobility group protein B1 OS=Homo sapiens OX=9606 GN=HMGB1 PE=1 SV=3	2	0	2	2	0	2	0.939313
P11021_K523	HSPA5	NK*ITITNDQNR	BIP_HUMAN Endoplasmic reticulum chaperone BiP OS=Homo sapiens OX=9606 GN=HSPA5 PE=1 SV=2	2	0	1	0	0	0	0.854253
Q9NX63_K173	CHCHD3	AAEEVEAK*FKR AAEEVEAK*FK	MIC19_HUMAN MICOS complex subunit MIC19 OS=Homo sapiens OX=9606 GN=CHCHD3 PE=1 SV=1	2	0	0	2	0	1	1.10338
Q9BVC6_K215	TMEM109	ASGAQLEAK*VR	TM109_HUMAN Transmembrane protein 109 OS=Homo sapiens OX=9606 GN=TMEM109 PE=1 SV=1	2	0	0	2	0	0	1.05167
P07910_K198	HNRNPC	K*ELTQIK	HNRPC_HUMAN Heterogeneous nuclear ribonucleoproteins C1/C2 OS=Homo sapiens OX=9606 GN=HNRNPC PE=1 SV=4	2	0	0	2	0	0	0.878038
P62081_K103	RPS7	ILPK*PTR	RS7_HUMAN 40S ribosomal protein S7 OS=Homo sapiens OX=9606 GN=RPS7 PE=1 SV=1	2	0	0	0	0	1	0.86809
P39687_K68	ANP32A	K*LELSDNR	AN32A_HUMAN Acidic leucine-rich nuclear phosphoprotein 32 family member A OS=Homo sapiens OX=9606 GN=ANP32A PE=1 SV=1	2	0	1	1	0	0	0.922933
P13639_K439	EEF2	K*EDLYLKPIQR	EF2_HUMAN Elongation factor 2 OS=Homo sapiens OX=9606 GN=EEF2 PE=1 SV=4	2	0	0	2	0	0	1.02578
P62753_K30	RPS6	TFYEK*R	RS6_HUMAN 40S ribosomal protein S6 OS=Homo sapiens OX=9606 GN=RPS6 PE=1 SV=1	2	0	0	2	2	2	0.939664
P29692_K117	EEF1D	LNVLEK*SSPGHR	EF1D_HUMAN Elongation factor 1-delta OS=Homo sapiens OX=9606 GN=EEF1D PE=1 SV=5	2	0	2	0	2	1	0.911286
P50991_K55	CCT4	TSLGPK*GMDK	TCPD_HUMAN T-complex protein 1 subunit delta OS=Homo sapiens OX=9606 GN=CCT4 PE=1 SV=4	2	0	0	2	0	0	0.833565
O15173_K193	PGRMC2	EK*YDYVGR	PGRC2_HUMAN Membrane-associated progesterone receptor component 2 OS=Homo sapiens OX=9606 GN=PGRMC2 PE=1 SV=1	2	0	2	0	0	0	0.96901
P62888_K9	RPL30	K*SLESINSR	RL30_HUMAN 60S ribosomal protein L30 OS=Homo sapiens OX=9606 GN=RPL30 PE=1 SV=2	2	0	1	2	0	0	1.15781
P30101_K129	PDIA3	TADGIVSHLK*K	PDIA3_HUMAN Protein disulfide-isomerase A3 OS=Homo sapiens OX=9606 GN=PDIA3 PE=1 SV=4	2	0	0	1	2	2	1.0533
Q8N1F7_K370	NUP93	LSPATENK*LR	NUP93_HUMAN Nuclear pore complex protein Nup93 OS=Homo sapiens OX=9606 GN=NUP93 PE=1 SV=2	2	0	0	2	0	0	0.93667
P08670_K188	VIM	LREK*LQEEMLQR	VIME_HUMAN Vimentin OS=Homo sapiens OX=9606 GN=VIM PE=1 SV=4	2	0	2	0	0	1	1.06174
P62913_K159	RPL11	ISK*EEAMR	RL11_HUMAN 60S ribosomal protein L11 OS=Homo sapiens OX=9606 GN=RPL11 PE=1 SV=2	2	0	0	2	0	0	0.804723
P60842_K369	EIF4A1	K*GVAINMVTEEDKR	IF4A1_HUMAN Eukaryotic initiation factor 4A-I OS=Homo sapiens OX=9606 GN=EIF4A1 PE=1 SV=1	2	0	0	0	0	0	0.915685
P12268_K134	IMPDH2	VRDVFEAK*AR DVFEAK*AR	IMDH2_HUMAN Inosine-5'-monophosphate dehydrogenase 2 OS=Homo sapiens OX=9606 GN=IMPDH2 PE=1 SV=2	2	0	0	2	0	2	0.830058
P22087_K102	FBL	GK*EDALVTK	FBRL_HUMAN rRNA 2'-O-methyltransferase fibrillarin OS=Homo sapiens OX=9606 GN=FBL PE=1 SV=2	2	0	0	1	0	0	0.838743
P23396_K202	RPS3	K*PLPDHVSIVEPK	RS3_HUMAN 40S ribosomal protein S3 OS=Homo sapiens OX=9606 GN=RPS3 PE=1 SV=2	2	0	0	0	0	0	1.01225
Q96K17_K115	BTF3L4	K*LAEQFPR	BT3L4_HUMAN Transcription factor BTF3 homolog 4 OS=Homo sapiens OX=9606 GN=BTF3L4 PE=1 SV=1	2	0	0	0	0	0	0.837265
P06748_K248	NPM1	GPSSVEDIK*AK	NPM_HUMAN Nucleophosmin OS=Homo sapiens OX=9606 GN=NPM1 PE=1 SV=2	2	2	1	2	2	2	0.946597
P24534_K66	EEF1B2	EK*ASLPGVK	EF1B_HUMAN Elongation factor 1-beta OS=Homo sapiens OX=9606 GN=EEF1B2 PE=1 SV=3	2	0	2	2	0	0	0.941085
P42167_K368	TMPO	RPIK*GAAGRPLELSDFR	LAP2B_HUMAN Lamina-associated polypeptide 2, isoforms beta/gamma OS=Homo sapiens OX=9606 GN=TMPO PE=1 SV=2	2	0	0	0	0	0	1.205
P27635_K121	RPL10	GAFGK*PQGTVAR	RL10_HUMAN 60S ribosomal protein L10 OS=Homo sapiens OX=9606 GN=RPL10 PE=1 SV=4	2	0	1	2	2	1	0.892381
P62857_K16	RPS28	VTK*VLGR	RS28_HUMAN 40S ribosomal protein S28 OS=Homo sapiens OX=9606 GN=RPS28 PE=1 SV=1	2	0	0	1	0	0	0.89723
A6NDG6_K80	PGP	AAYAEK*LR	PGP_HUMAN Glycerol-3-phosphate phosphatase OS=Homo sapiens OX=9606 GN=PGP PE=1 SV=1	2	0	0	0	0	0	1.04126
P63220_K74	RPS21	LAK*ADGIVSK	RS21_HUMAN 40S ribosomal protein S21 OS=Homo sapiens OX=9606 GN=RPS21 PE=1 SV=1	2	0	0	2	0	1	0.976294
P35268_K107	RPL22	VVANSK*ESYELR	RL22_HUMAN 60S ribosomal protein L22 OS=Homo sapiens OX=9606 GN=RPL22 PE=1 SV=2	2	0	1	2	0	0	0.945522
Q08211_K16	DHX9	K*MTPSYEIR	DHX9_HUMAN ATP-dependent RNA helicase A OS=Homo sapiens OX=9606 GN=DHX9 PE=1 SV=4	2	0	0	0	0	0	0.698155
P10809_K202	HSPD1	GVITVK*DGK	CH60_HUMAN 60 kDa heat shock protein, mitochondrial OS=Homo sapiens OX=9606 GN=HSPD1 PE=1 SV=2	2	0	0	1	1	1	0.913752
Q14204_K2286	DYNC1H1	K*IIDSVR	DYHC1_HUMAN Cytoplasmic dynein 1 heavy chain 1 OS=Homo sapiens OX=9606 GN=DYNC1H1 PE=1 SV=5	2	0	1	0	0	0	0.994127
Q9Y383_K29	LUC7L2	IK*FSDDR	LC7L2_HUMAN Putative RNA-binding protein Luc7-like 2 OS=Homo sapiens OX=9606 GN=LUC7L2 PE=1 SV=2	2	0	0	0	0	0	0.69129
Q12874_K496	SF3A3	TYEDLK*R	SF3A3_HUMAN Splicing factor 3A subunit 3 OS=Homo sapiens OX=9606 GN=SF3A3 PE=1 SV=1	2	0	0	0	0	0	1.07159
P30153_K163	PPP2R1A	VSSAVK*AELR	2AAA_HUMAN Serine/threonine-protein phosphatase 2A 65 kDa regulatory subunit A alpha isoform OS=Homo sapiens OX=9606 GN=PPP2R1A PE=1 SV=4	2	0	0	2	0	0	0.963365
P37837_K292	TALDO1	IHLDEK*SFR	TALDO_HUMAN Transaldolase OS=Homo sapiens OX=9606 GN=TALDO1 PE=1 SV=2	2	0	0	2	0	0	1.0162
P23526_K322	AHCY	VNIK*PQVDR	SAHH_HUMAN Adenosylhomocysteinase OS=Homo sapiens OX=9606 GN=AHCY PE=1 SV=4	2	0	0	0	0	0	0.895745
P40429_K191	RPL13A	KIDK*YTEVLK	RL13A_HUMAN 60S ribosomal protein L13a OS=Homo sapiens OX=9606 GN=RPL13A PE=1 SV=2	2	0	0	0	0	0	0.84133
Q5VTE0_K392	EEF1A1P5	KLEDGPK*FLK LEDGPK*FLK	EF1A3_HUMAN Putative elongation factor 1-alpha-like 3 OS=Homo sapiens OX=9606 GN=EEF1A1P5 PE=5 SV=1	2	0	1	2	1	2	0.963797
P31942_K97	HNRNPH3	SEIK*GFYDPPRR	HNRH3_HUMAN Heterogeneous nuclear ribonucleoprotein H3 OS=Homo sapiens OX=9606 GN=HNRNPH3 PE=1 SV=2	2	0	0	0	0	0	0.985435
P36578_K294	RPL4	ILK*SPEIQR	RL4_HUMAN 60S ribosomal protein L4 OS=Homo sapiens OX=9606 GN=RPL4 PE=1 SV=5	2	0	0	2	0	0	0.865075
P60866_K59	RPS20	MPTK*TLR	RS20_HUMAN 40S ribosomal protein S20 OS=Homo sapiens OX=9606 GN=RPS20 PE=1 SV=1	2	0	0	0	0	1	0.912387
P62191_K98	PSMC1	SK*VDDLR	PRS4_HUMAN 26S proteasome regulatory subunit 4 OS=Homo sapiens OX=9606 GN=PSMC1 PE=1 SV=1	2	0	0	0	0	0	0.90238
P06748_K257	NPM1	MQASIEK*GGSLPK	NPM_HUMAN Nucleophosmin OS=Homo sapiens OX=9606 GN=NPM1 PE=1 SV=2	2	0	2	1	0	0	0.853848
Q92945_K71	KHSRP	K*DAFADAVQR	FUBP2_HUMAN Far upstream element-binding protein 2 OS=Homo sapiens OX=9606 GN=KHSRP PE=1 SV=4	2	0	2	1	0	0	0.925944
P55265_K715	ADAR	K*IGELVR	DSRAD_HUMAN Double-stranded RNA-specific adenosine deaminase OS=Homo sapiens OX=9606 GN=ADAR PE=1 SV=4	2	0	0	0	0	0	1.19401
P62701_K106	RPS4X	LIYDTK*GR	RS4X_HUMAN 40S ribosomal protein S4, X isoform OS=Homo sapiens OX=9606 GN=RPS4X PE=1 SV=2	2	0	0	1	0	1	1.13367
P10809_K125	HSPD1	SIAK*EGFEK	CH60_HUMAN 60 kDa heat shock protein, mitochondrial OS=Homo sapiens OX=9606 GN=HSPD1 PE=1 SV=2	2	0	0	2	0	0	0.91258
P0DMV9_K77	HSPA1B	K*FGDPVVQSDMK	HS71B_HUMAN Heat shock 70 kDa protein 1B OS=Homo sapiens OX=9606 GN=HSPA1B PE=1 SV=1	2	0	2	0	0	0	0.968385
Q9Y262_K549	EIF3L	QIHK*FEELNR	EIF3L_HUMAN Eukaryotic translation initiation factor 3 subunit L OS=Homo sapiens OX=9606 GN=EIF3L PE=1 SV=1	2	0	2	0	0	0	1.23286
Q9Y3U8_K62	RPL36	AMELLK*VSK	RL36_HUMAN 60S ribosomal protein L36 OS=Homo sapiens OX=9606 GN=RPL36 PE=1 SV=3	2	0	1	2	2	2	1.0525
P10809_K133	HSPD1	ISK*GANPVEIR	CH60_HUMAN 60 kDa heat shock protein, mitochondrial OS=Homo sapiens OX=9606 GN=HSPD1 PE=1 SV=2	2	0	2	2	0	1	1.01064
Q08945_K580	SSRP1	K*AGEIWK	SSRP1_HUMAN FACT complex subunit SSRP1 OS=Homo sapiens OX=9606 GN=SSRP1 PE=1 SV=1	2	0	0	0	0	0	1.33229
P61254_K28	RPL26	K*IMSSPLSK	RL26_HUMAN 60S ribosomal protein L26 OS=Homo sapiens OX=9606 GN=RPL26 PE=1 SV=1	2	0	0	0	0	0	1.02211
P14314_K376	PRKCSH	NK*FEEAER	GLU2B_HUMAN Glucosidase 2 subunit beta OS=Homo sapiens OX=9606 GN=PRKCSH PE=1 SV=2	2	0	0	0	0	0	0.89775
P62241_K140	RPS8	LTPEEEEILNKK*R	RS8_HUMAN 40S ribosomal protein S8 OS=Homo sapiens OX=9606 GN=RPS8 PE=1 SV=2	2	0	0	1	0	0	0.92547
P18124_K77	RPL7	K*AGNFYVPAEPK	RL7_HUMAN 60S ribosomal protein L7 OS=Homo sapiens OX=9606 GN=RPL7 PE=1 SV=1	2	0	1	0	0	0	0.902353
P11940_K512	PABPC1	TVPQYK*YAAGVR	PABP1_HUMAN Polyadenylate-binding protein 1 OS=Homo sapiens OX=9606 GN=PABPC1 PE=1 SV=2	2	0	0	0	0	0	1.0049
P30153_K133	PPP2R1A	AISHEHSPSDLEAHFVPLVK*R	2AAA_HUMAN Serine/threonine-protein phosphatase 2A 65 kDa regulatory subunit A alpha isoform OS=Homo sapiens OX=9606 GN=PPP2R1A PE=1 SV=4	2	0	0	0	0	0	0.75791
P13639_K512	EEF2	VAVEAK*NPADLPK	EF2_HUMAN Elongation factor 2 OS=Homo sapiens OX=9606 GN=EEF2 PE=1 SV=4	2	0	2	2	0	2	0.874071
P78371_K522	CCT2	VDNIIK*AAPR	TCPB_HUMAN T-complex protein 1 subunit beta OS=Homo sapiens OX=9606 GN=CCT2 PE=1 SV=4	2	0	0	2	0	0	0.993888
P40227_K10	CCT6A	TLNPK*AEVAR	TCPZ_HUMAN T-complex protein 1 subunit zeta OS=Homo sapiens OX=9606 GN=CCT6A PE=1 SV=3	2	0	0	0	0	0	1.11801
P52272_K388	HNRNPM	GEIIAK*QGGGGGGGSVPGIER	HNRPM_HUMAN Heterogeneous nuclear ribonucleoprotein M OS=Homo sapiens OX=9606 GN=HNRNPM PE=1 SV=3	2	0	2	2	1	0	0.959586
Q01130_K36	SRSF2	VFEK*YGR	SRSF2_HUMAN Serine/arginine-rich splicing factor 2 OS=Homo sapiens OX=9606 GN=SRSF2 PE=1 SV=4	2	0	0	2	0	0	0.89081
Q5VTE0_K215	EEF1A1P5	GWK*VTR	EF1A3_HUMAN Putative elongation factor 1-alpha-like 3 OS=Homo sapiens OX=9606 GN=EEF1A1P5 PE=5 SV=1	2	0	0	2	0	0	0.96084
P61313_K153	RPL15	NPDTQWITK*PVHK	RL15_HUMAN 60S ribosomal protein L15 OS=Homo sapiens OX=9606 GN=RPL15 PE=1 SV=2	2	0	0	0	0	0	0.872605
P47914_K33	RPL29	YESLK*GVDPK	RL29_HUMAN 60S ribosomal protein L29 OS=Homo sapiens OX=9606 GN=RPL29 PE=1 SV=2	2	0	0	1	2	0	0.817816
P09874_K331	PARP1	K*EWVTPK	PARP1_HUMAN Poly [ADP-ribose] polymerase 1 OS=Homo sapiens OX=9606 GN=PARP1 PE=1 SV=4	2	0	0	0	0	0	1.14518
P24311_K75	COX7B	VTPK*EWR	COX7B_HUMAN Cytochrome c oxidase subunit 7B, mitochondrial OS=Homo sapiens OX=9606 GN=COX7B PE=1 SV=2	2	0	0	0	0	0	1.05001
P11142_K512	HSPA8	LSK*EDIER	HSP7C_HUMAN Heat shock cognate 71 kDa protein OS=Homo sapiens OX=9606 GN=HSPA8 PE=1 SV=1	2	1	2	2	0	1	0.897698
P13639_K445	EEF2	KEDLYLK*PIQR EDLYLK*PIQR	EF2_HUMAN Elongation factor 2 OS=Homo sapiens OX=9606 GN=EEF2 PE=1 SV=4	2	0	1	2	0	0	0.97112
P39023_K373	RPL3	FIDTTSK*FGHGR	RL3_HUMAN 60S ribosomal protein L3 OS=Homo sapiens OX=9606 GN=RPL3 PE=1 SV=2	2	0	2	1	1	0	0.964953
P06733_K71	ENO1	AVEHINK*TIAPALVSK	ENOA_HUMAN Alpha-enolase OS=Homo sapiens OX=9606 GN=ENO1 PE=1 SV=2	2	0	1	2	0	0	0.954504
P13667_K163	PDIA4	TQEEIVAK*VR	PDIA4_HUMAN Protein disulfide-isomerase A4 OS=Homo sapiens OX=9606 GN=PDIA4 PE=1 SV=2	2	0	0	0	0	0	0.837055
Q9UMS4_K192	PRPF19	GK*TVPEELVKPEELSK	PRP19_HUMAN Pre-mRNA-processing factor 19 OS=Homo sapiens OX=9606 GN=PRPF19 PE=1 SV=1	2	0	1	2	0	0	0.787264
Q9UII2_K71	ATP5IF1	EQLAALK*K	ATIF1_HUMAN ATPase inhibitor, mitochondrial OS=Homo sapiens OX=9606 GN=ATP5IF1 PE=1 SV=1	2	0	0	2	0	0	0.940005
P49368_K78	CCT3	EIQVQHPAAK*SMIEISR	TCPG_HUMAN T-complex protein 1 subunit gamma OS=Homo sapiens OX=9606 GN=CCT3 PE=1 SV=4	2	0	0	0	0	0	0.908275
P26641_K277	EEF1G	AK*DPFAHLPK	EF1G_HUMAN Elongation factor 1-gamma OS=Homo sapiens OX=9606 GN=EEF1G PE=1 SV=3	2	0	2	0	0	1	0.968038
P27635_K101	RPL10	INK*MLSCAGADR	RL10_HUMAN 60S ribosomal protein L10 OS=Homo sapiens OX=9606 GN=RPL10 PE=1 SV=4	2	0	2	0	0	0	0.785967
P78371_K431	CCT2	TPGK*EAVAMESYAK	TCPB_HUMAN T-complex protein 1 subunit beta OS=Homo sapiens OX=9606 GN=CCT2 PE=1 SV=4	2	0	2	0	0	0	1.08319
P30101_K366	PDIA3	YLK*SEPIPESNDGPVK	PDIA3_HUMAN Protein disulfide-isomerase A3 OS=Homo sapiens OX=9606 GN=PDIA3 PE=1 SV=4	2	0	0	0	0	0	0.915895
P62937_K44	PPIA	ALSTGEK*GFGYK	PPIA_HUMAN Peptidyl-prolyl cis-trans isomerase A OS=Homo sapiens OX=9606 GN=PPIA PE=1 SV=2	2	0	2	2	2	2	0.90671
P10809_K130	HSPD1	EGFEK*ISK	CH60_HUMAN 60 kDa heat shock protein, mitochondrial OS=Homo sapiens OX=9606 GN=HSPD1 PE=1 SV=2	2	0	0	2	2	2	0.821007
P07355_K227	ANXA2	SVPHLQK*VFDR	ANXA2_HUMAN Annexin A2 OS=Homo sapiens OX=9606 GN=ANXA2 PE=1 SV=2	2	0	0	1	0	0	0.840333
P60842_K146	EIF4A1	AEVQK*LQMEAPHIIVGTPGR	IF4A1_HUMAN Eukaryotic initiation factor 4A-I OS=Homo sapiens OX=9606 GN=EIF4A1 PE=1 SV=1	2	0	2	2	1	2	0.927618
P54819_K14	AK2	APSVPAAEPEYPK*GIR	KAD2_HUMAN Adenylate kinase 2, mitochondrial OS=Homo sapiens OX=9606 GN=AK2 PE=1 SV=2	2	0	2	2	0	1	0.917291
P06733_K256	ENO1	SGK*YDLDFKSPDDPSR SGK*YDLDFK	ENOA_HUMAN Alpha-enolase OS=Homo sapiens OX=9606 GN=ENO1 PE=1 SV=2	2	0	2	2	0	1	0.874936
P25787_K53	PSMA2	QK*SILYDER	PSA2_HUMAN Proteasome subunit alpha type-2 OS=Homo sapiens OX=9606 GN=PSMA2 PE=1 SV=2	2	0	1	0	0	0	1.35903
O00264_K102	PGRMC1	VFDVTK*GR	PGRC1_HUMAN Membrane-associated progesterone receptor component 1 OS=Homo sapiens OX=9606 GN=PGRMC1 PE=1 SV=3	2	0	0	2	0	2	1.01508
Q9HB71_K19	CACYBP	VLLEK*ATR	CYBP_HUMAN Calcyclin-binding protein OS=Homo sapiens OX=9606 GN=CACYBP PE=1 SV=2	2	0	0	2	0	0	0.922295
P61289_K14	PSME3	LK*VDSFR	PSME3_HUMAN Proteasome activator complex subunit 3 OS=Homo sapiens OX=9606 GN=PSME3 PE=1 SV=1	2	0	0	1	0	0	1.04855
P32119_K10	PRDX2	IGK*PAPDFK	PRDX2_HUMAN Peroxiredoxin-2 OS=Homo sapiens OX=9606 GN=PRDX2 PE=1 SV=5	2	0	0	1	0	1	0.973548
P06733_K80	ENO1	TIAPALVSK*K	ENOA_HUMAN Alpha-enolase OS=Homo sapiens OX=9606 GN=ENO1 PE=1 SV=2	2	2	0	2	1	2	1.01293
Q08211_K146	DHX9	GANLK*DYYSR	DHX9_HUMAN ATP-dependent RNA helicase A OS=Homo sapiens OX=9606 GN=DHX9 PE=1 SV=4	2	0	1	2	1	0	0.91127
P09651_K350	HNRNPA1	SSGPYGGGGQYFAK*PR	ROA1_HUMAN Heterogeneous nuclear ribonucleoprotein A1 OS=Homo sapiens OX=9606 GN=HNRNPA1 PE=1 SV=5	2	2	2	2	1	2	0.86327
P13639_K259	EEF2	K*LWGDR	EF2_HUMAN Elongation factor 2 OS=Homo sapiens OX=9606 GN=EEF2 PE=1 SV=4	2	0	0	1	0	0	1.02263
P14625_K683	HSP90B1	K*TFEINPR	ENPL_HUMAN Endoplasmin OS=Homo sapiens OX=9606 GN=HSP90B1 PE=1 SV=1	2	0	0	0	0	0	1.0545
P20700_K134	LMNB1	ESDLNGAQIK*LR	LMNB1_HUMAN Lamin-B1 OS=Homo sapiens OX=9606 GN=LMNB1 PE=1 SV=2	2	0	0	2	0	2	1.06361
P08670_K439	VIM	ETNLDSLPLVDTHSK*R	VIME_HUMAN Vimentin OS=Homo sapiens OX=9606 GN=VIM PE=1 SV=4	2	0	2	1	2	2	0.948656
P05387_K25	RPLP2	K*ILDSVGIEADDDRLNK	RLA2_HUMAN 60S acidic ribosomal protein P2 OS=Homo sapiens OX=9606 GN=RPLP2 PE=1 SV=1	2	0	0	0	0	0	1.0187
Q15126_K48	PMVK	LSGPLK*EQYAQEHGLNFQR	PMVK_HUMAN Phosphomevalonate kinase OS=Homo sapiens OX=9606 GN=PMVK PE=1 SV=3	2	0	0	0	0	0	0.90406
Q9Y265_K2	RUVBL1	MK*IEEVK	RUVB1_HUMAN RuvB-like 1 OS=Homo sapiens OX=9606 GN=RUVBL1 PE=1 SV=1	2	0	0	0	0	0	0.831035
Q13347_K264	EIF3I	IGK*FEAR	EIF3I_HUMAN Eukaryotic translation initiation factor 3 subunit I OS=Homo sapiens OX=9606 GN=EIF3I PE=1 SV=1	2	0	0	2	0	1	0.952892
P12956_K468	XRCC6	AIVEK*LR	XRCC6_HUMAN X-ray repair cross-complementing protein 6 OS=Homo sapiens OX=9606 GN=XRCC6 PE=1 SV=2	2	0	0	2	0	0	0.843822
P42766_K66	RPL35	VLTVINQTQK*ENLR	RL35_HUMAN 60S ribosomal protein L35 OS=Homo sapiens OX=9606 GN=RPL35 PE=1 SV=2	2	0	0	1	0	0	1.07735
P78527_K3753	PRKDC	EHPFLVK*GGEDLR	PRKDC_HUMAN DNA-dependent protein kinase catalytic subunit OS=Homo sapiens OX=9606 GN=PRKDC PE=1 SV=3	2	0	1	0	2	0	1.06747
P62750_K115	RPL23A	K*LYDIDVAK	RL23A_HUMAN 60S ribosomal protein L23a OS=Homo sapiens OX=9606 GN=RPL23A PE=1 SV=1	2	0	0	0	0	0	0.990975
Q14444_K234	CAPRIN1	VLK*EIVER	CAPR1_HUMAN Caprin-1 OS=Homo sapiens OX=9606 GN=CAPRIN1 PE=1 SV=2	2	0	0	1	0	0	0.958957
P07437_K58	TUBB	ISVYYNEATGGK*YVPR	TBB5_HUMAN Tubulin beta chain OS=Homo sapiens OX=9606 GN=TUBB PE=1 SV=2	2	0	2	2	0	2	0.833493
P68371_K58	TUBB4B	INVYYNEATGGK*YVPR	TBB4B_HUMAN Tubulin beta-4B chain OS=Homo sapiens OX=9606 GN=TUBB4B PE=1 SV=1	2	0	1	2	0	0	0.90023
P10606_K56	COX5B	EIMLAAK*K	COX5B_HUMAN Cytochrome c oxidase subunit 5B, mitochondrial OS=Homo sapiens OX=9606 GN=COX5B PE=1 SV=2	2	0	0	1	0	0	2.21583
P06576_K426	ATP5F1B	GVQK*ILQDYK	ATPB_HUMAN ATP synthase subunit beta, mitochondrial OS=Homo sapiens OX=9606 GN=ATP5F1B PE=1 SV=3	2	0	0	1	0	0	0.957987
P26583_K128	HMGB2	K*LGEMWSEQSAK	HMGB2_HUMAN High mobility group protein B2 OS=Homo sapiens OX=9606 GN=HMGB2 PE=1 SV=2	2	0	1	0	0	0	0.96521
P09874_K700	PARP1	MPLGK*LSK	PARP1_HUMAN Poly [ADP-ribose] polymerase 1 OS=Homo sapiens OX=9606 GN=PARP1 PE=1 SV=4	2	0	0	0	0	0	0.904915
P22234_K36	PAICS	VLLQSK*DQITAGNAAR	PUR6_HUMAN Multifunctional protein ADE2 OS=Homo sapiens OX=9606 GN=PAICS PE=1 SV=3	2	0	0	0	0	0	1.11331
Q15233_K198	NONO	GIVEFSGK*PAAR	NONO_HUMAN Non-POU domain-containing octamer-binding protein OS=Homo sapiens OX=9606 GN=NONO PE=1 SV=4	2	0	1	2	0	1	0.93785
P26641_K434	EEF1G	AFNQGK*IFK	EF1G_HUMAN Elongation factor 1-gamma OS=Homo sapiens OX=9606 GN=EEF1G PE=1 SV=3	2	0	0	2	0	2	0.745035
P00558_K267	PGK1	IVK*DLMSK	PGK1_HUMAN Phosphoglycerate kinase 1 OS=Homo sapiens OX=9606 GN=PGK1 PE=1 SV=3	2	0	0	0	0	0	0.92215
P04181_K405	OAT	DNGLLAK*PTHGDIIR	OAT_HUMAN Ornithine aminotransferase, mitochondrial OS=Homo sapiens OX=9606 GN=OAT PE=1 SV=1	2	0	2	0	2	1	0.933364
P61604_K36	HSPE1	GGIMLPEK*SQGK	CH10_HUMAN 10 kDa heat shock protein, mitochondrial OS=Homo sapiens OX=9606 GN=HSPE1 PE=1 SV=2	2	0	0	0	0	0	0.98596
P49411_K418	TUFM	QPMILEK*GQR	EFTU_HUMAN Elongation factor Tu, mitochondrial OS=Homo sapiens OX=9606 GN=TUFM PE=1 SV=2	2	0	0	0	0	0	0.811965
P49368_K353	CCT3	IVSRPEELREDDVGTGAGLLEIK*K EDDVGTGAGLLEIK*K	TCPG_HUMAN T-complex protein 1 subunit gamma OS=Homo sapiens OX=9606 GN=CCT3 PE=1 SV=4	2	0	0	2	0	2	1.08011
P10606_K86	COX5B	EDPNLVPSISNK*R	COX5B_HUMAN Cytochrome c oxidase subunit 5B, mitochondrial OS=Homo sapiens OX=9606 GN=COX5B PE=1 SV=2	2	0	0	0	0	0	1.02603
Q99623_K216	PHB2	AQFLVEK*AK	PHB2_HUMAN Prohibitin-2 OS=Homo sapiens OX=9606 GN=PHB2 PE=1 SV=2	2	0	0	1	0	0	0.92168
P49327_K673	FASN	EGVFAK*EVR	FAS_HUMAN Fatty acid synthase OS=Homo sapiens OX=9606 GN=FASN PE=1 SV=3	2	0	0	1	0	0	0.985793
O75534_K758	CSDE1	LK*NITLDDASAPR	CSDE1_HUMAN Cold shock domain-containing protein E1 OS=Homo sapiens OX=9606 GN=CSDE1 PE=1 SV=2	2	0	1	0	0	0	0.812617
P13073_K87	COX4I1	FK*ESFAEMNR	COX41_HUMAN Cytochrome c oxidase subunit 4 isoform 1, mitochondrial OS=Homo sapiens OX=9606 GN=COX4I1 PE=1 SV=1	2	0	0	0	0	0	0.92254
Q9UMS4_K179	PRPF19	LQDK*ATVLTTER	PRP19_HUMAN Pre-mRNA-processing factor 19 OS=Homo sapiens OX=9606 GN=PRPF19 PE=1 SV=1	2	0	2	0	0	0	1.12177
P78527_K2694	PRKDC	APLK*SVGPDFGK	PRKDC_HUMAN DNA-dependent protein kinase catalytic subunit OS=Homo sapiens OX=9606 GN=PRKDC PE=1 SV=3	2	0	0	0	0	0	0.8265
P61077_K8	UBE2D3	INK*ELSDLAR	UB2D3_HUMAN Ubiquitin-conjugating enzyme E2 D3 OS=Homo sapiens OX=9606 GN=UBE2D3 PE=1 SV=1	2	0	2	2	0	1	0.956609
P10809_K359	HSPD1	VGEVIVTKDDAMLLK*GK	CH60_HUMAN 60 kDa heat shock protein, mitochondrial OS=Homo sapiens OX=9606 GN=HSPD1 PE=1 SV=2	2	0	0	2	0	0	0.91423
P23246_K413	SFPQ	STGK*GIVEFASK	SFPQ_HUMAN Splicing factor, proline- and glutamine-rich OS=Homo sapiens OX=9606 GN=SFPQ PE=1 SV=2	2	0	1	0	0	0	1.21212
O15347_K59	HMGB3	SK*FDEMAK	HMGB3_HUMAN High mobility group protein B3 OS=Homo sapiens OX=9606 GN=HMGB3 PE=1 SV=4	2	0	0	0	0	0	0.9796
Q01105_K83	SET	QPFFQK*R	SET_HUMAN Protein SET OS=Homo sapiens OX=9606 GN=SET PE=1 SV=3	2	0	0	2	0	0	0.94423
Q15233_K295	NONO	EK*LEMEMEAAR	NONO_HUMAN Non-POU domain-containing octamer-binding protein OS=Homo sapiens OX=9606 GN=NONO PE=1 SV=4	2	0	2	1	0	0	0.943692
P30086_K47	PEBP1	VLTPTQVK*NRPTSISWDGLDSGK	PEBP1_HUMAN Phosphatidylethanolamine-binding protein 1 OS=Homo sapiens OX=9606 GN=PEBP1 PE=1 SV=3	2	0	0	0	0	0	1.05588
P23246_K421	SFPQ	GIVEFASK*PAAR	SFPQ_HUMAN Splicing factor, proline- and glutamine-rich OS=Homo sapiens OX=9606 GN=SFPQ PE=1 SV=2	2	0	0	2	0	2	0.87009
P60763_K96	RAC3	AK*WYPEVR	RAC3_HUMAN Ras-related C3 botulinum toxin substrate 3 OS=Homo sapiens OX=9606 GN=RAC3 PE=1 SV=1	2	0	0	1	0	0	1.09558
P07900_K458	HSP90AA1	K*LSELLR	HS90A_HUMAN Heat shock protein HSP 90-alpha OS=Homo sapiens OX=9606 GN=HSP90AA1 PE=1 SV=5	2	0	2	2	0	1	0.859796
P62805_K32	H4C1	DNIQGITK*PAIR	H4_HUMAN Histone H4 OS=Homo sapiens OX=9606 GN=H4C1 PE=1 SV=2	2	0	1	2	0	2	0.88321
P08670_K120	VIM	FANYIDK*VR	VIME_HUMAN Vimentin OS=Homo sapiens OX=9606 GN=VIM PE=1 SV=4	2	2	2	2	2	2	0.959094
P10809_K72	HSPD1	TVIIEQSWGSPK*VTK	CH60_HUMAN 60 kDa heat shock protein, mitochondrial OS=Homo sapiens OX=9606 GN=HSPD1 PE=1 SV=2	2	0	1	0	0	0	1.12619
P62424_K26	RPL7A	K*VVNPLFEK	RL7A_HUMAN 60S ribosomal protein L7a OS=Homo sapiens OX=9606 GN=RPL7A PE=1 SV=2	2	0	0	0	0	0	1.00669
P00558_K146	PGK1	AEPAK*IEAFR	PGK1_HUMAN Phosphoglycerate kinase 1 OS=Homo sapiens OX=9606 GN=PGK1 PE=1 SV=3	2	0	2	2	0	1	0.993041
P11021_K96	HSPA5	NQLTSNPENTVFDAK*R	BIP_HUMAN Endoplasmic reticulum chaperone BiP OS=Homo sapiens OX=9606 GN=HSPA5 PE=1 SV=2	2	0	0	2	0	1	0.905766
P06733_K406	ENO1	LAK*YNQLLR	ENOA_HUMAN Alpha-enolase OS=Homo sapiens OX=9606 GN=ENO1 PE=1 SV=2	2	0	1	0	0	0	0.83948
P07237_K81	P4HB	LAK*VDATEESDLAQQYGVR	PDIA1_HUMAN Protein disulfide-isomerase OS=Homo sapiens OX=9606 GN=P4HB PE=1 SV=3	2	0	2	0	0	1	0.93421
P11021_K185	HSPA5	QATK*DAGTIAGLNVMR	BIP_HUMAN Endoplasmic reticulum chaperone BiP OS=Homo sapiens OX=9606 GN=HSPA5 PE=1 SV=2	2	0	2	0	0	0	0.900285
P61604_K28	HSPE1	SAAETVTK*GGIMLPEK	CH10_HUMAN 10 kDa heat shock protein, mitochondrial OS=Homo sapiens OX=9606 GN=HSPE1 PE=1 SV=2	2	0	2	0	0	0	1.09237
P00338_K318	LDHA	K*SADTLWGIQK	LDHA_HUMAN L-lactate dehydrogenase A chain OS=Homo sapiens OX=9606 GN=LDHA PE=1 SV=2	2	0	1	0	0	0	1.01686
P30041_K209	PRDX6	GVFTK*ELPSGK	PRDX6_HUMAN Peroxiredoxin-6 OS=Homo sapiens OX=9606 GN=PRDX6 PE=1 SV=3	2	0	2	2	2	2	0.874475
P00558_K353	PGK1	GTK*ALMDEVVK	PGK1_HUMAN Phosphoglycerate kinase 1 OS=Homo sapiens OX=9606 GN=PGK1 PE=1 SV=3	2	0	2	2	2	0	0.999782
Q14204_K3471	DYNC1H1	ADLAAVEAK*VNR	DYHC1_HUMAN Cytoplasmic dynein 1 heavy chain 1 OS=Homo sapiens OX=9606 GN=DYNC1H1 PE=1 SV=5	2	0	0	0	0	0	0.83185
P04406_K215	GAPDH	GALQNIIPASTGAAK*AVGK	G3P_HUMAN Glyceraldehyde-3-phosphate dehydrogenase OS=Homo sapiens OX=9606 GN=GAPDH PE=1 SV=3	2	0	2	2	0	0	0.958115
Q00839_K31	HNRNPU	LSDKGLK*AELMER	HNRPU_HUMAN Heterogeneous nuclear ribonucleoprotein U OS=Homo sapiens OX=9606 GN=HNRNPU PE=1 SV=6	2	0	0	2	1	1	1.09992
P13639_K272	EEF2	YFDPANGK*FSK	EF2_HUMAN Elongation factor 2 OS=Homo sapiens OX=9606 GN=EEF2 PE=1 SV=4	2	0	0	0	0	0	0.886025
P04406_K219	GAPDH	AVGK*VIPELNGK	G3P_HUMAN Glyceraldehyde-3-phosphate dehydrogenase OS=Homo sapiens OX=9606 GN=GAPDH PE=1 SV=3	2	0	2	2	0	0	0.963918
P13667_K234	PDIA4	RSPPIPLAK*VDATAETDLAK SPPIPLAK*VDATAETDLAKR SPPIPLAK*VDATAETDLAK	PDIA4_HUMAN Protein disulfide-isomerase A4 OS=Homo sapiens OX=9606 GN=PDIA4 PE=1 SV=2	2	0	2	0	0	0	1.00522
P05388_K77	RPLP0	GHLENNPALEK*LLPHIR	RLA0_HUMAN 60S acidic ribosomal protein P0 OS=Homo sapiens OX=9606 GN=RPLP0 PE=1 SV=1	2	0	2	1	0	0	0.87786
P0DMV9_K71	HSPA1B	NQVALNPQNTVFDAK*R	HS71B_HUMAN Heat shock 70 kDa protein 1B OS=Homo sapiens OX=9606 GN=HSPA1B PE=1 SV=1	2	2	2	2	0	1	0.917301
P11142_K71	HSPA8	NQVAMNPTNTVFDAK*R	HSP7C_HUMAN Heat shock cognate 71 kDa protein OS=Homo sapiens OX=9606 GN=HSPA8 PE=1 SV=1	2	0	2	2	0	2	0.91865
P52272_K381	HNRNPM	INEILSNALK*R	HNRPM_HUMAN Heterogeneous nuclear ribonucleoprotein M OS=Homo sapiens OX=9606 GN=HNRNPM PE=1 SV=3	2	0	0	2	0	1	0.888106
P08670_K294	VIM	SK*FADLSEAANR	VIME_HUMAN Vimentin OS=Homo sapiens OX=9606 GN=VIM PE=1 SV=4	2	2	2	2	2	2	0.930989
Q9BTT0_K65	ANP32E	#VALUE!	AN32E_HUMAN Acidic leucine-rich nuclear phosphoprotein 32 family member E OS=Homo sapiens OX=9606 GN=ANP32E PE=1 SV=1	2	0	0	0	0	0	1.15796
P18124_K29	RPL7	NFAELK*IK	RL7_HUMAN 60S ribosomal protein L7 OS=Homo sapiens OX=9606 GN=RPL7 PE=1 SV=1	2	0	0	2	0	0	0.87944
Q14103_K183	HNRNPD	K*IFVGGLSPDTPEEK	HNRPD_HUMAN Heterogeneous nuclear ribonucleoprotein D0 OS=Homo sapiens OX=9606 GN=HNRNPD PE=1 SV=1	2	0	1	0	0	0	0.927577
P56182_K205	RRP1	TK*DSLVLNNITR	RRP1_HUMAN Ribosomal RNA processing protein 1 homolog A OS=Homo sapiens OX=9606 GN=RRP1 PE=1 SV=1	2	0	0	0	0	0	1.04437
P62888_K57	RPL30	K*SEIEYYAMLAK	RL30_HUMAN 60S ribosomal protein L30 OS=Homo sapiens OX=9606 GN=RPL30 PE=1 SV=2	2	0	0	0	0	0	0.854545
P26373_K177	RPL13	VITEEEKNFK*AFASLR	RL13_HUMAN 60S ribosomal protein L13 OS=Homo sapiens OX=9606 GN=RPL13 PE=1 SV=4	2	0	2	2	0	0	0.989545
P23246_K516	SFPQ	DAK*DKLESEMEDAYHEHQANLLR	SFPQ_HUMAN Splicing factor, proline- and glutamine-rich OS=Homo sapiens OX=9606 GN=SFPQ PE=1 SV=2	2	0	0	0	0	0	0.865945
P11142_K319	HSPA8	GTLDPVEK*ALR	HSP7C_HUMAN Heat shock cognate 71 kDa protein OS=Homo sapiens OX=9606 GN=HSPA8 PE=1 SV=1	2	0	0	2	1	1	0.973677
P32119_K16	PRDX2	IGKPAPDFK*ATAVVDGAFK	PRDX2_HUMAN Peroxiredoxin-2 OS=Homo sapiens OX=9606 GN=PRDX2 PE=1 SV=5	2	0	0	0	0	0	0.981335
Q9Y383_K122	LUC7L2	LAETQEEISAEVAAK*AER	LC7L2_HUMAN Putative RNA-binding protein Luc7-like 2 OS=Homo sapiens OX=9606 GN=LUC7L2 PE=1 SV=2	2	0	0	2	0	0	0.870073
P11142_K328	HSPA8	LDK*SQIHDIVLVGGSTR	HSP7C_HUMAN Heat shock cognate 71 kDa protein OS=Homo sapiens OX=9606 GN=HSPA8 PE=1 SV=1	2	0	2	2	1	1	1.01431
P07900_K58	HSP90AA1	ELISNSSDALDK*IR	HS90A_HUMAN Heat shock protein HSP 90-alpha OS=Homo sapiens OX=9606 GN=HSP90AA1 PE=1 SV=5	2	0	0	1	1	2	1.10825
P06748_K267	NPM1	VEAK*FINYVK	NPM_HUMAN Nucleophosmin OS=Homo sapiens OX=9606 GN=NPM1 PE=1 SV=2	2	0	2	2	0	0	0.989725
P62805_K80	H4C1	K*TVTAMDVVYALK	H4_HUMAN Histone H4 OS=Homo sapiens OX=9606 GN=H4C1 PE=1 SV=2	2	0	1	0	0	0	1.13525
P11142_K128	HSPA8	MK*EIAEAYLGK	HSP7C_HUMAN Heat shock cognate 71 kDa protein OS=Homo sapiens OX=9606 GN=HSPA8 PE=1 SV=1	2	0	1	0	0	0	1.03756
Q13263_K750	TRIM28	LQEK*LSPPYSSPQEFAQDVGR	TIF1B_HUMAN Transcription intermediary factor 1-beta OS=Homo sapiens OX=9606 GN=TRIM28 PE=1 SV=5	2	0	0	0	0	0	1.11666
P60660_K50	MYL6	ALGQNPTNAEVLK*VLGNPK	MYL6_HUMAN Myosin light polypeptide 6 OS=Homo sapiens OX=9606 GN=MYL6 PE=1 SV=2	2	0	0	0	0	0	1.36986
P36578_K353	RPL4	VDK*AAAAAAALQAK	RL4_HUMAN 60S ribosomal protein L4 OS=Homo sapiens OX=9606 GN=RPL4 PE=1 SV=5	2	0	0	0	0	0	1.28949
P0DMV9_K328	HSPA1B	LDK*AQIHDLVLVGGSTR	HS71B_HUMAN Heat shock 70 kDa protein 1B OS=Homo sapiens OX=9606 GN=HSPA1B PE=1 SV=1	2	0	2	2	2	2	0.969983
P11142_K159	HSPA8	QATK*DAGTIAGLNVLR	HSP7C_HUMAN Heat shock cognate 71 kDa protein OS=Homo sapiens OX=9606 GN=HSPA8 PE=1 SV=1	2	0	2	2	0	1	0.895621
P10809_K396	HSPD1	LAK*LSDGVAVLK	CH60_HUMAN 60 kDa heat shock protein, mitochondrial OS=Homo sapiens OX=9606 GN=HSPD1 PE=1 SV=2	2	0	1	2	0	2	0.773993
P41250_K108	GARS1	VLEAK*ELALQPK	GARS_HUMAN Glycine--tRNA ligase OS=Homo sapiens OX=9606 GN=GARS1 PE=1 SV=3	2	0	0	0	0	0	0.848985
P61353_K93	RPL27	YSVDIPLDK*TVVNKDVFRDPALK YSVDIPLDK*TVVNK	RL27_HUMAN 60S ribosomal protein L27 OS=Homo sapiens OX=9606 GN=RPL27 PE=1 SV=2	2	0	0	0	0	0	1.05293
P61978_K405	HNRNPK	DLAGSIIGK*GGQR	HNRPK_HUMAN Heterogeneous nuclear ribonucleoprotein K OS=Homo sapiens OX=9606 GN=HNRNPK PE=1 SV=1	2	0	2	2	0	2	0.972526
P31948_K78	STIP1	K*AAALEFLNR	STIP1_HUMAN Stress-induced-phosphoprotein 1 OS=Homo sapiens OX=9606 GN=STIP1 PE=1 SV=1	2	0	0	0	0	0	1.21252
P62244_K84	RPS15A	FDVQLK*DLEK	RS15A_HUMAN 40S ribosomal protein S15a OS=Homo sapiens OX=9606 GN=RPS15A PE=1 SV=2	2	0	0	0	0	0	0.868365
O95347_K493	SMC2	LK*ETYEALLAR	SMC2_HUMAN Structural maintenance of chromosomes protein 2 OS=Homo sapiens OX=9606 GN=SMC2 PE=1 SV=2	2	0	0	0	0	0	0.956635
P11142_K88	HSPA8	FDDAVVQSDMK*HWPFMVVNDAGRPK	HSP7C_HUMAN Heat shock cognate 71 kDa protein OS=Homo sapiens OX=9606 GN=HSPA8 PE=1 SV=1	2	0	0	0	2	0	0.91737
P09874_K108	PARP1	AEK*TLGDFAAEYAK	PARP1_HUMAN Poly [ADP-ribose] polymerase 1 OS=Homo sapiens OX=9606 GN=PARP1 PE=1 SV=4	2	0	1	2	0	0	0.941902
P62937_K125	PPIA	TEWLDGK*HVVFGK	PPIA_HUMAN Peptidyl-prolyl cis-trans isomerase A OS=Homo sapiens OX=9606 GN=PPIA PE=1 SV=2	2	0	2	0	1	0	0.98535
Q9H223_K35	EHD4	K*VLPLEEAYR	EHD4_HUMAN EH domain-containing protein 4 OS=Homo sapiens OX=9606 GN=EHD4 PE=1 SV=1	2	0	0	0	0	0	1.1544
P62937_K31	PPIA	VSFELFADKVPK*TAENFR	PPIA_HUMAN Peptidyl-prolyl cis-trans isomerase A OS=Homo sapiens OX=9606 GN=PPIA PE=1 SV=2	2	0	2	2	2	0	0.944506
P62937_K155	PPIA	K*ITIADCGQLE	PPIA_HUMAN Peptidyl-prolyl cis-trans isomerase A OS=Homo sapiens OX=9606 GN=PPIA PE=1 SV=2	2	0	0	1	0	0	0.537453
P49755_K145	TMED10	LK*PLEVELR	TMEDA_HUMAN Transmembrane emp24 domain-containing protein 10 OS=Homo sapiens OX=9606 GN=TMED10 PE=1 SV=2	2	0	0	0	0	0	0.824435
P13639_K318	EEF2	LIEK*LDIK	EF2_HUMAN Elongation factor 2 OS=Homo sapiens OX=9606 GN=EEF2 PE=1 SV=4	2	0	0	2	0	2	0.954577
Q9Y383_K61	LUC7L2	MDLGECLK*VHDLALR	LC7L2_HUMAN Putative RNA-binding protein Luc7-like 2 OS=Homo sapiens OX=9606 GN=LUC7L2 PE=1 SV=2	2	0	1	0	2	2	1.03801
O00264_K105	PGRMC1	K*FYGPEGPYGVFAGR	PGRC1_HUMAN Membrane-associated progesterone receptor component 1 OS=Homo sapiens OX=9606 GN=PGRMC1 PE=1 SV=3	2	0	2	0	0	0	0.77295
P50990_K440	CCT8	K*FAEAFEAIPR	TCPQ_HUMAN T-complex protein 1 subunit theta OS=Homo sapiens OX=9606 GN=CCT8 PE=1 SV=4	2	0	2	1	0	0	1.02169
Q00839_K186	HNRNPU	EAAGK*SSGPTSLFAVTVAPPGAR	HNRPU_HUMAN Heterogeneous nuclear ribonucleoprotein U OS=Homo sapiens OX=9606 GN=HNRNPU PE=1 SV=6	2	0	2	0	0	0	1.05784
P55072_K148	VCP	K*GDIFLVR	TERA_HUMAN Transitional endoplasmic reticulum ATPase OS=Homo sapiens OX=9606 GN=VCP PE=1 SV=4	2	0	0	1	0	0	0.98156
P40429_K103	RPL13A	LK*VFDGIPPPYDK	RL13A_HUMAN 60S ribosomal protein L13a OS=Homo sapiens OX=9606 GN=RPL13A PE=1 SV=2	2	0	1	0	0	0	1.07206
P14618_K206	PKM	GADFLVTEVENGGSLGSK*K	KPYM_HUMAN Pyruvate kinase PKM OS=Homo sapiens OX=9606 GN=PKM PE=1 SV=4	2	0	1	2	0	0	0.965414
P27635_K208	RPL10	GPLDK*WR	RL10_HUMAN 60S ribosomal protein L10 OS=Homo sapiens OX=9606 GN=RPL10 PE=1 SV=4	2	2	2	2	2	1	0.926014
P00558_K11	PGK1	LTLDK*LDVK	PGK1_HUMAN Phosphoglycerate kinase 1 OS=Homo sapiens OX=9606 GN=PGK1 PE=1 SV=3	2	0	0	0	0	0	0.92734
Q9BZZ5_K84	API5	QAIK*ELPQFATGENLPR	API5_HUMAN Apoptosis inhibitor 5 OS=Homo sapiens OX=9606 GN=API5 PE=1 SV=3	2	0	1	1	0	0	0.9309
P50991_K531	CCT4	SILK*IDDVVNTR	TCPD_HUMAN T-complex protein 1 subunit delta OS=Homo sapiens OX=9606 GN=CCT4 PE=1 SV=4	2	0	0	0	0	0	1.13867
P50990_K400	CCT8	AVDDGVNTFK*VLTR	TCPQ_HUMAN T-complex protein 1 subunit theta OS=Homo sapiens OX=9606 GN=CCT8 PE=1 SV=4	2	0	2	2	0	0	1.10058
P50991_K42	CCT4	FSNISAAK*AVADAIR	TCPD_HUMAN T-complex protein 1 subunit delta OS=Homo sapiens OX=9606 GN=CCT4 PE=1 SV=4	2	0	0	0	0	0	1.10459
P26639_K549	TARS1	IDIQIK*DAIGR	SYTC_HUMAN Threonine--tRNA ligase 1, cytoplasmic OS=Homo sapiens OX=9606 GN=TARS1 PE=1 SV=3	2	0	0	0	0	0	0.834955
Q9NZI8_K280	IGF2BP1	TADEVPLK*ILAHNNFVGR	IF2B1_HUMAN Insulin-like growth factor 2 mRNA-binding protein 1 OS=Homo sapiens OX=9606 GN=IGF2BP1 PE=1 SV=2	2	0	0	0	0	0	0.85787
Q6NUK1_K437	SLC25A24	IISK*EGIPGLYR	SCMC1_HUMAN Calcium-binding mitochondrial carrier protein SCaMC-1 OS=Homo sapiens OX=9606 GN=SLC25A24 PE=1 SV=2	2	0	0	0	0	0	0.852415
P62851_K66	RPS25	EVPNYK*LITPAVVSER	RS25_HUMAN 40S ribosomal protein S25 OS=Homo sapiens OX=9606 GN=RPS25 PE=1 SV=1	2	0	2	0	0	0	0.892823
Q92841_K547	DDX17	VLEEANQAINPK*LMQLVDHR	DDX17_HUMAN Probable ATP-dependent RNA helicase DDX17 OS=Homo sapiens OX=9606 GN=DDX17 PE=1 SV=2	2	0	1	0	0	0	1.00994
P08559_K313	PDHA1	SK*SDPIMLLK	ODPA_HUMAN Pyruvate dehydrogenase E1 component subunit alpha, somatic form, mitochondrial OS=Homo sapiens OX=9606 GN=PDHA1 PE=1 SV=3	2	0	0	0	0	0	0.7526
P09960_K573	LTA4H	FTRPLFK*DLAAFDK	LKHA4_HUMAN Leukotriene A-4 hydrolase OS=Homo sapiens OX=9606 GN=LTA4H PE=1 SV=2	2	0	0	0	0	0	1.27092
P06576_K133	ATP5F1B	VLDSGAPIK*IPVGPETLGR	ATPB_HUMAN ATP synthase subunit beta, mitochondrial OS=Homo sapiens OX=9606 GN=ATP5F1B PE=1 SV=3	2	0	2	2	0	2	1.01537
P62491_K61	RAB11A	TIK*AQIWDTAGQER	RB11A_HUMAN Ras-related protein Rab-11A OS=Homo sapiens OX=9606 GN=RAB11A PE=1 SV=3	2	0	0	0	0	0	0.972745
P84098_K46	RPL19	LIK*DGLIIR	RL19_HUMAN 60S ribosomal protein L19 OS=Homo sapiens OX=9606 GN=RPL19 PE=1 SV=1	2	0	0	0	0	0	1.00601
Q15459_K55	SF3A1	NIVDK*TASFVAR	SF3A1_HUMAN Splicing factor 3A subunit 1 OS=Homo sapiens OX=9606 GN=SF3A1 PE=1 SV=1	2	0	0	2	2	0	0.91609
Q92945_K205	KHSRP	AK*MMLDDIVSR	FUBP2_HUMAN Far upstream element-binding protein 2 OS=Homo sapiens OX=9606 GN=KHSRP PE=1 SV=4	2	0	0	0	0	0	0.97538
P23246_K319	SFPQ	LFAK*YGEPGEVFINK	SFPQ_HUMAN Splicing factor, proline- and glutamine-rich OS=Homo sapiens OX=9606 GN=SFPQ PE=1 SV=2	2	0	1	0	0	1	1.06546
P49591_K28	SARS1	FK*DPGLVDQLVK	SYSC_HUMAN Serine--tRNA ligase, cytoplasmic OS=Homo sapiens OX=9606 GN=SARS1 PE=1 SV=3	2	0	0	0	0	0	1.16186
P25705_K230	ATP5F1A	TSIAIDTIINQK*R	ATPA_HUMAN ATP synthase subunit alpha, mitochondrial OS=Homo sapiens OX=9606 GN=ATP5F1A PE=1 SV=1	2	0	0	0	0	0	1.09449
P62937_K133	PPIA	VK*EGMNIVEAMER	PPIA_HUMAN Peptidyl-prolyl cis-trans isomerase A OS=Homo sapiens OX=9606 GN=PPIA PE=1 SV=2	2	0	0	1	0	1	1.0872
P23526_K20	AHCY	K*ALDIAENEMPGLMR	SAHH_HUMAN Adenosylhomocysteinase OS=Homo sapiens OX=9606 GN=AHCY PE=1 SV=4	2	0	0	0	0	0	0.969995
Q5TC12_K83	ATPAF1	DK*IQLLR	ATPF1_HUMAN ATP synthase mitochondrial F1 complex assembly factor 1 OS=Homo sapiens OX=9606 GN=ATPAF1 PE=1 SV=1	2	0	0	0	0	0	0.73834
P39019_K111	RPS19	VLQALEGLK*MVEK	RS19_HUMAN 40S ribosomal protein S19 OS=Homo sapiens OX=9606 GN=RPS19 PE=1 SV=2	2	0	0	1	0	0	1.05408
O60488_K670	ACSL4	FEIPIK*VR	ACSL4_HUMAN Long-chain-fatty-acid--CoA ligase 4 OS=Homo sapiens OX=9606 GN=ACSL4 PE=1 SV=2	2	0	0	0	0	0	0.805135
P25705_K194	ATP5F1A	EPMQTGIK*AVDSLVPIGR	ATPA_HUMAN ATP synthase subunit alpha, mitochondrial OS=Homo sapiens OX=9606 GN=ATP5F1A PE=1 SV=1	2	0	2	0	0	1	0.914766
P05387_K41	RPLP2	ILDSVGIEADDDRLNK*VISELNGK	RLA2_HUMAN 60S acidic ribosomal protein P2 OS=Homo sapiens OX=9606 GN=RPLP2 PE=1 SV=1	2	0	0	0	0	0	1.00645
Q15233_K272	NONO	WK*ALIEMEK	NONO_HUMAN Non-POU domain-containing octamer-binding protein OS=Homo sapiens OX=9606 GN=NONO PE=1 SV=4	2	0	0	0	0	0	1.18698
P48643_K529	CCT5	MILK*IDDIR	TCPE_HUMAN T-complex protein 1 subunit epsilon OS=Homo sapiens OX=9606 GN=CCT5 PE=1 SV=1	2	0	0	0	0	0	0.96295
P07195_K308	LDHB	GLTSVINQK*LKDDEVAQLK GLTSVINQK*LK	LDHB_HUMAN L-lactate dehydrogenase B chain OS=Homo sapiens OX=9606 GN=LDHB PE=1 SV=2	2	0	1	2	1	1	0.894904
P27824_K118	CANX	LPGDK*GLVLMSR	CALX_HUMAN Calnexin OS=Homo sapiens OX=9606 GN=CANX PE=1 SV=2	2	0	0	0	0	0	0.961625
Q01105_K132	SET	VEVTEFEDIK*SGYR	SET_HUMAN Protein SET OS=Homo sapiens OX=9606 GN=SET PE=1 SV=3	2	0	1	2	1	2	1.05551
P05388_K106	RPLP0	DMLLANK*VPAAAR	RLA0_HUMAN 60S acidic ribosomal protein P0 OS=Homo sapiens OX=9606 GN=RPLP0 PE=1 SV=1	2	0	0	2	0	0	1.34362
P49327_K436	FASN	TPEAVQK*LLEQGLR	FAS_HUMAN Fatty acid synthase OS=Homo sapiens OX=9606 GN=FASN PE=1 SV=3	2	0	0	0	0	0	0.871875
P08670_K235	VIM	KVESLQEEIAFLK*K	VIME_HUMAN Vimentin OS=Homo sapiens OX=9606 GN=VIM PE=1 SV=4	2	0	0	2	0	0	1.2727
P30101_K362	PDIA3	FLQDYFDGNLK*R	PDIA3_HUMAN Protein disulfide-isomerase A3 OS=Homo sapiens OX=9606 GN=PDIA3 PE=1 SV=4	2	0	0	1	0	1	1.05428
P39023_K366	RPL3	IDLK*FIDTTSK	RL3_HUMAN 60S ribosomal protein L3 OS=Homo sapiens OX=9606 GN=RPL3 PE=1 SV=2	2	0	0	0	0	0	0.96206
P20700_K145	LMNB1	EYEAALNSK*DAALATALGDKK	LMNB1_HUMAN Lamin-B1 OS=Homo sapiens OX=9606 GN=LMNB1 PE=1 SV=2	2	0	0	0	0	1	0.92814
P11021_K573	HSPA5	NELESYAYSLK*NQIGDKEK	BIP_HUMAN Endoplasmic reticulum chaperone BiP OS=Homo sapiens OX=9606 GN=HSPA5 PE=1 SV=2	2	0	0	2	0	0	1.09166
P07437_K297	TUBB	ALTVPELTQQVFDAK*NMMAACDPR	TBB5_HUMAN Tubulin beta chain OS=Homo sapiens OX=9606 GN=TUBB PE=1 SV=2	2	2	0	2	0	0	0.98418
P54727_K45	RAD23B	DAFPVAGQK*LIYAGK	RD23B_HUMAN UV excision repair protein RAD23 homolog B OS=Homo sapiens OX=9606 GN=RAD23B PE=1 SV=1	2	0	0	0	0	0	1.08422
P38919_K198	EIF4A3	GFK*EQIYDVYR	IF4A3_HUMAN Eukaryotic initiation factor 4A-III OS=Homo sapiens OX=9606 GN=EIF4A3 PE=1 SV=4	2	0	2	0	0	0	1.00716
P08195_K166	SLC3A2	FTGLSK*EELLK	4F2_HUMAN 4F2 cell-surface antigen heavy chain OS=Homo sapiens OX=9606 GN=SLC3A2 PE=1 SV=3	2	0	0	0	0	0	0.94753
P62244_K88	RPS15A	DLEK*WQNNLLPSR	RS15A_HUMAN 40S ribosomal protein S15a OS=Homo sapiens OX=9606 GN=RPS15A PE=1 SV=2	2	0	0	0	0	0	1.10581
A0A0B4J2D5_K116	GATD3B	GK*ITDLANLSAANHDAAIFPGGFGAAK	GAL3B_HUMAN Glutamine amidotransferase-like class 1 domain-containing protein 3B, mitochondrial OS=Homo sapiens OX=9606 GN=GATD3B PE=1 SV=1	2	0	0	0	0	0	1.1681
P83731_K93	RPL24	AITGASLADIMAK*R	RL24_HUMAN 60S ribosomal protein L24 OS=Homo sapiens OX=9606 GN=RPL24 PE=1 SV=1	2	0	0	2	0	2	0.858357
P11142_K112	HSPA8	GETK*SFYPEEVSSMVLTK	HSP7C_HUMAN Heat shock cognate 71 kDa protein OS=Homo sapiens OX=9606 GN=HSPA8 PE=1 SV=1	2	0	0	0	2	0	1.03955
Q14978_K33	NOLC1	DNQLSEVANK*FAK	NOLC1_HUMAN Nucleolar and coiled-body phosphoprotein 1 OS=Homo sapiens OX=9606 GN=NOLC1 PE=1 SV=2	2	0	0	1	0	0	1.16662
P30405_K67	PPIF	VVLELK*ADVVPK	PPIF_HUMAN Peptidyl-prolyl cis-trans isomerase F, mitochondrial OS=Homo sapiens OX=9606 GN=PPIF PE=1 SV=1	2	0	0	0	0	0	1.31583
E9PAV3_K2005	NACA	IEDLSQQAQLAAAEK*FK	NACAM_HUMAN Nascent polypeptide-associated complex subunit alpha, muscle-specific form OS=Homo sapiens OX=9606 GN=NACA PE=1 SV=1	2	0	0	2	0	0	0.873622
P14618_K62	PKM	SVETLK*EMIK	KPYM_HUMAN Pyruvate kinase PKM OS=Homo sapiens OX=9606 GN=PKM PE=1 SV=4	2	0	0	2	2	1	0.895227
P62829_K66	RPL23	LPAAGVGDMVMATVK*K	RL23_HUMAN 60S ribosomal protein L23 OS=Homo sapiens OX=9606 GN=RPL23 PE=1 SV=1	2	0	0	0	0	0	0.84048
P30153_K266	PPP2R1A	YMVADK*FTELQK	2AAA_HUMAN Serine/threonine-protein phosphatase 2A 65 kDa regulatory subunit A alpha isoform OS=Homo sapiens OX=9606 GN=PPP2R1A PE=1 SV=4	2	0	0	0	0	0	1.17826
P07910_K206	HNRNPC	QK*VDSLLENLEK	HNRPC_HUMAN Heterogeneous nuclear ribonucleoproteins C1/C2 OS=Homo sapiens OX=9606 GN=HNRNPC PE=1 SV=4	2	0	2	0	0	2	0.959367
P49720_K77	PSMB3	LNLYELK*EGR	PSB3_HUMAN Proteasome subunit beta type-3 OS=Homo sapiens OX=9606 GN=PSMB3 PE=1 SV=2	2	0	0	2	0	0	1.01529
P35232_K240	PHB	K*LEAAEDIAYQLSR	PHB_HUMAN Prohibitin OS=Homo sapiens OX=9606 GN=PHB PE=1 SV=1	2	0	0	0	0	1	0.925447
P09874_K683	PARP1	MIFDVESMK*K	PARP1_HUMAN Poly [ADP-ribose] polymerase 1 OS=Homo sapiens OX=9606 GN=PARP1 PE=1 SV=4	2	0	0	2	0	0	1.01588
P11142_K188	HSPA8	IINEPTAAAIAYGLDKK*VGAER	HSP7C_HUMAN Heat shock cognate 71 kDa protein OS=Homo sapiens OX=9606 GN=HSPA8 PE=1 SV=1	2	0	1	1	0	0	0.768973
Q15029_K684	EFTUD2	NK*ITMIAEPLEK	U5S1_HUMAN 116 kDa U5 small nuclear ribonucleoprotein component OS=Homo sapiens OX=9606 GN=EFTUD2 PE=1 SV=1	2	0	0	0	0	0	1.08543
Q92973_K889	TNPO1	FSDQFPLPLK*ER	TNPO1_HUMAN Transportin-1 OS=Homo sapiens OX=9606 GN=TNPO1 PE=1 SV=2	2	0	0	0	0	0	1.07471
P08670_K373	VIM	LQDEIQNMK*EEMAR	VIME_HUMAN Vimentin OS=Homo sapiens OX=9606 GN=VIM PE=1 SV=4	2	1	2	1	0	0	0.790285
P08238_K347	HSP90AB1	APFDLFENK*K	HS90B_HUMAN Heat shock protein HSP 90-beta OS=Homo sapiens OX=9606 GN=HSP90AB1 PE=1 SV=4	2	0	0	1	0	2	0.903758
Q3ZCQ8_K312	TIMM50	TVLEHYALEDDPLAAFK*QR	TIM50_HUMAN Mitochondrial import inner membrane translocase subunit TIM50 OS=Homo sapiens OX=9606 GN=TIMM50 PE=1 SV=2	2	0	0	0	0	0	0.91951
P37837_K277	TALDO1	LVPVLSAK*AAQASDLEK	TALDO_HUMAN Transaldolase OS=Homo sapiens OX=9606 GN=TALDO1 PE=1 SV=2	2	0	0	0	0	0	1.069
P52888_K538	THOP1	ELLEK*LIESR	THOP1_HUMAN Thimet oligopeptidase OS=Homo sapiens OX=9606 GN=THOP1 PE=1 SV=2	2	0	0	0	0	0	1.03104
Q14152_K351	EIF3A	LLDMDGIIVEK*QR	EIF3A_HUMAN Eukaryotic translation initiation factor 3 subunit A OS=Homo sapiens OX=9606 GN=EIF3A PE=1 SV=1	2	0	0	0	0	0	1.06112
P30101_K433	PDIA3	LSKDPNIVIAK*MDATANDVPSPYEVR	PDIA3_HUMAN Protein disulfide-isomerase A3 OS=Homo sapiens OX=9606 GN=PDIA3 PE=1 SV=4	2	0	0	0	0	0	1.26441
P06748_K212	NPM1	SNQNGK*DSKPSSTPR	NPM_HUMAN Nucleophosmin OS=Homo sapiens OX=9606 GN=NPM1 PE=1 SV=2	1	0	1	2	0	0	0.919385
Q00839_K682	HNRNPU	K*QNTGSK	HNRPU_HUMAN Heterogeneous nuclear ribonucleoprotein U OS=Homo sapiens OX=9606 GN=HNRNPU PE=1 SV=6	1	0	0	0	0	0	0.95238
Q13813_K2251	SPTAN1	K*HQEIR	SPTN1_HUMAN Spectrin alpha chain, non-erythrocytic 1 OS=Homo sapiens OX=9606 GN=SPTAN1 PE=1 SV=3	1	0	1	2	0	0	1.01084
Q15424_K399	SAFB	LSKEEK*GR	SAFB1_HUMAN Scaffold attachment factor B1 OS=Homo sapiens OX=9606 GN=SAFB PE=1 SV=4	1	0	0	0	0	0	1.11111
P78527_K4085	PRKDC	GSK*DHNIR	PRKDC_HUMAN DNA-dependent protein kinase catalytic subunit OS=Homo sapiens OX=9606 GN=PRKDC PE=1 SV=3	1	0	1	1	2	0	1.03086
Q9NVI7_K262	ATAD3A	LK*AAEHR	ATD3A_HUMAN ATPase family AAA domain-containing protein 3A OS=Homo sapiens OX=9606 GN=ATAD3A PE=1 SV=2	1	0	0	1	0	1	0.922963
Q07021_K123	C1QBP	K*VAGEK	C1QBP_HUMAN Complement component 1 Q subcomponent-binding protein, mitochondrial OS=Homo sapiens OX=9606 GN=C1QBP PE=1 SV=1	1	0	0	0	0	0	0.91743
P04406_K117	GAPDH	AGAHLQGGAK*R	G3P_HUMAN Glyceraldehyde-3-phosphate dehydrogenase OS=Homo sapiens OX=9606 GN=GAPDH PE=1 SV=3	1	0	1	2	2	0	0.798667
P40926_K157	MDH2	K*HGVYNPNK	MDHM_HUMAN Malate dehydrogenase, mitochondrial OS=Homo sapiens OX=9606 GN=MDH2 PE=1 SV=3	1	0	2	2	0	0	0.921
P36915_K492	GNL1	TAK*AAR	GNL1_HUMAN Guanine nucleotide-binding protein-like 1 OS=Homo sapiens OX=9606 GN=GNL1 PE=1 SV=2	1	0	0	2	0	0	0.997567
Q02878_K20	RPL6	K*VDAGGK	RL6_HUMAN 60S ribosomal protein L6 OS=Homo sapiens OX=9606 GN=RPL6 PE=1 SV=3	1	0	0	0	0	0	1.42857
P50502_K230	ST13	AQK*IAEHR	F10A1_HUMAN Hsc70-interacting protein OS=Homo sapiens OX=9606 GN=ST13 PE=1 SV=2	1	0	0	0	0	0	1.13636
P10412_K160	H1-4	K*PAAAAGAK	H14_HUMAN Histone H1.4 OS=Homo sapiens OX=9606 GN=H1-4 PE=1 SV=2	1	0	0	0	0	0	1.21951
P10412_K32	H1-4	SAGAAK*R	H14_HUMAN Histone H1.4 OS=Homo sapiens OX=9606 GN=H1-4 PE=1 SV=2	1	0	0	1	0	0	0.81277
P61927_K14	RPL37	NK*THTLCR	RL37_HUMAN 60S ribosomal protein L37 OS=Homo sapiens OX=9606 GN=RPL37 PE=1 SV=2	1	0	1	0	0	0	0.695795
P37802_K156	TAGLN2	SK*ENPR	TAGL2_HUMAN Transgelin-2 OS=Homo sapiens OX=9606 GN=TAGLN2 PE=1 SV=3	1	0	0	1	0	0	0.87777
P16949_K62	STMN1	K*SHEAEVLK	STMN1_HUMAN Stathmin OS=Homo sapiens OX=9606 GN=STMN1 PE=1 SV=3	1	0	1	1	0	0	0.913013
P07814_K360	EPRS1	CK*IQPHPR	SYEP_HUMAN Bifunctional glutamate/proline--tRNA ligase OS=Homo sapiens OX=9606 GN=EPRS1 PE=1 SV=5	1	0	0	0	0	0	1.02782
P31946_K77	YWHAB	K*QQMGK	1433B_HUMAN 14-3-3 protein beta/alpha OS=Homo sapiens OX=9606 GN=YWHAB PE=1 SV=3	1	0	0	1	0	0	0.767155
P19338_K294	NCL	AAPEAK*K	NUCL_HUMAN Nucleolin OS=Homo sapiens OX=9606 GN=NCL PE=1 SV=3	1	0	0	1	0	0	1.0363
Q99729_K215	HNRNPAB	K*FHTVSGSK	ROAA_HUMAN Heterogeneous nuclear ribonucleoprotein A/B OS=Homo sapiens OX=9606 GN=HNRNPAB PE=1 SV=2	1	0	0	0	0	0	1.17647
Q15637_K104	SF1	KK*LEEER	SF01_HUMAN Splicing factor 1 OS=Homo sapiens OX=9606 GN=SF1 PE=1 SV=4	1	0	0	0	0	0	0.42194
Q14103_K243	HNRNPD	K*YHNVGLSK	HNRPD_HUMAN Heterogeneous nuclear ribonucleoprotein D0 OS=Homo sapiens OX=9606 GN=HNRNPD PE=1 SV=1	1	0	0	0	0	0	0.52632
P50914_K204	RPL14	APAQK*APAPK	RL14_HUMAN 60S ribosomal protein L14 OS=Homo sapiens OX=9606 GN=RPL14 PE=1 SV=4	1	0	2	0	0	0	1.08426
Q99623_K89	PHB2	K*ISSPTGSK	PHB2_HUMAN Prohibitin-2 OS=Homo sapiens OX=9606 GN=PHB2 PE=1 SV=2	1	0	0	0	0	0	1.5873
P38646_K537	HSPA9	DK*GTGR	GRP75_HUMAN Stress-70 protein, mitochondrial OS=Homo sapiens OX=9606 GN=HSPA9 PE=1 SV=2	1	0	0	0	0	0	0.8
P62891_K5	RPL39	SSHK*TFR	RL39_HUMAN 60S ribosomal protein L39 OS=Homo sapiens OX=9606 GN=RPL39 PE=1 SV=2	1	0	0	0	0	0	0.68493
Q5VTE0_K450	EEF1A1P5	AAGAGK*VTK	EF1A3_HUMAN Putative elongation factor 1-alpha-like 3 OS=Homo sapiens OX=9606 GN=EEF1A1P5 PE=5 SV=1	1	0	0	1	0	0	0.949595
P42766_K97	RPL35	LNK*HEENLK	RL35_HUMAN 60S ribosomal protein L35 OS=Homo sapiens OX=9606 GN=RPL35 PE=1 SV=2	1	0	0	0	0	0	1.16279
O76021_K33	RSL1D1	KQLDK*EQVR	RL1D1_HUMAN Ribosomal L1 domain-containing protein 1 OS=Homo sapiens OX=9606 GN=RSL1D1 PE=1 SV=3	1	0	0	2	0	0	1.04143
O00571_K255	DDX3X	AMK*ENGR	DDX3X_HUMAN ATP-dependent RNA helicase DDX3X OS=Homo sapiens OX=9606 GN=DDX3X PE=1 SV=3	1	0	0	2	0	0	0.68728
O14818_K166	PSMA7	GAK*SVR	PSA7_HUMAN Proteasome subunit alpha type-7 OS=Homo sapiens OX=9606 GN=PSMA7 PE=1 SV=1	1	0	0	0	0	0	1.0101
P19338_K87	NCL	AAVTPGK*K	NUCL_HUMAN Nucleolin OS=Homo sapiens OX=9606 GN=NCL PE=1 SV=3	1	0	0	1	0	0	0.672305
P99999_K40	CYCS	K*TGQAPGYSYTAANK	CYC_HUMAN Cytochrome c OS=Homo sapiens OX=9606 GN=CYCS PE=1 SV=2	1	0	0	0	0	0	0.77594
P36578_K269	RPL4	K*AASLK	RL4_HUMAN 60S ribosomal protein L4 OS=Homo sapiens OX=9606 GN=RPL4 PE=1 SV=5	1	0	0	0	0	0	1.25
P06733_K64	ENO1	GVSK*AVEHINK	ENOA_HUMAN Alpha-enolase OS=Homo sapiens OX=9606 GN=ENO1 PE=1 SV=2	1	0	1	0	1	0	0.825637
P62424_K125	RPL7A	AAGK*GDVPTK	RL7A_HUMAN 60S ribosomal protein L7a OS=Homo sapiens OX=9606 GN=RPL7A PE=1 SV=2	1	0	1	1	0	0	1.02627
Q9Y3U8_K23	RPL36	NVSK*PR	RL36_HUMAN 60S ribosomal protein L36 OS=Homo sapiens OX=9606 GN=RPL36 PE=1 SV=3	1	0	0	0	0	0	1.6129
P61026_K136	RAB10	GK*GEQIAR	RAB10_HUMAN Ras-related protein Rab-10 OS=Homo sapiens OX=9606 GN=RAB10 PE=1 SV=1	1	0	0	0	0	0	1.20482
P46779_K84	RPL28	TTINK*NAR	RL28_HUMAN 60S ribosomal protein L28 OS=Homo sapiens OX=9606 GN=RPL28 PE=1 SV=3	1	0	0	2	2	1	0.930485
P52362_K703	U31	QK*LATK	LTP_HHV7J Large tegument protein deneddylase OS=Human herpesvirus 7 (strain JI) OX=57278 GN=U31 PE=3 SV=1	1	0	0	0	1	0	0.63943
O15371_K412	EIF3D	QK*LDSQR	EIF3D_HUMAN Eukaryotic translation initiation factor 3 subunit D OS=Homo sapiens OX=9606 GN=EIF3D PE=1 SV=1	1	0	0	0	0	0	1.05263
Q8WXF1_K14	PSPC1	IEK*NPAR	PSPC1_HUMAN Paraspeckle component 1 OS=Homo sapiens OX=9606 GN=PSPC1 PE=1 SV=1	1	0	0	0	0	0	1.02041
P62917_K149	RPL8	VK*LPSGSK	RL8_HUMAN 60S ribosomal protein L8 OS=Homo sapiens OX=9606 GN=RPL8 PE=1 SV=2	1	0	0	0	0	0	1.07539
P10599_K3	TXN	VK*QIESK	THIO_HUMAN Thioredoxin OS=Homo sapiens OX=9606 GN=TXN PE=1 SV=3	1	0	0	2	0	0	1.09078
P26599_K137	PTBP1	ELK*TDSSPNQAR	PTBP1_HUMAN Polypyrimidine tract-binding protein 1 OS=Homo sapiens OX=9606 GN=PTBP1 PE=1 SV=1	1	0	2	1	0	0	0.71509
P49207_K19	RPL34	LSYNTASNK*TR	RL34_HUMAN 60S ribosomal protein L34 OS=Homo sapiens OX=9606 GN=RPL34 PE=1 SV=3	1	0	0	1	0	2	1.21694
P46779_K72	RPL28	K*PATSYVR	RL28_HUMAN 60S ribosomal protein L28 OS=Homo sapiens OX=9606 GN=RPL28 PE=1 SV=3	1	0	0	0	0	0	0.97955
P62249_K143	RPS16	YQK*SYR	RS16_HUMAN 40S ribosomal protein S16 OS=Homo sapiens OX=9606 GN=RPS16 PE=1 SV=2	1	0	0	2	0	0	0.829583
P63151_K248	PPP2R2A	SK*GTLR	2ABA_HUMAN Serine/threonine-protein phosphatase 2A 55 kDa regulatory subunit B alpha isoform OS=Homo sapiens OX=9606 GN=PPP2R2A PE=1 SV=1	1	0	0	0	0	0	1.0989
P35244_K33	RPA3	LEK*IHPTGK	RFA3_HUMAN Replication protein A 14 kDa subunit OS=Homo sapiens OX=9606 GN=RPA3 PE=1 SV=1	1	0	0	0	0	0	0.68493
Q8NC51_K52	SERBP1	EAGGGGVGGPGAK*SAAQAAAQTNSNAAGK	PAIRB_HUMAN Plasminogen activator inhibitor 1 RNA-binding protein OS=Homo sapiens OX=9606 GN=SERBP1 PE=1 SV=2	1	0	0	0	0	0	0.86207
P62805_K13	H4C1	GLGK*GGAK	H4_HUMAN Histone H4 OS=Homo sapiens OX=9606 GN=H4C1 PE=1 SV=2	1	0	0	1	1	1	0.69362
P31948_K162	STIP1	NK*PSDLGTK	STIP1_HUMAN Stress-induced-phosphoprotein 1 OS=Homo sapiens OX=9606 GN=STIP1 PE=1 SV=1	1	0	0	0	0	0	0.88443
Q9NR30_K577	DDX21	ASSK*DAIR	DDX21_HUMAN Nucleolar RNA helicase 2 OS=Homo sapiens OX=9606 GN=DDX21 PE=1 SV=5	1	0	0	1	0	0	0.97955
P52272_K127	HNRNPM	K*AAEVLNK	HNRPM_HUMAN Heterogeneous nuclear ribonucleoprotein M OS=Homo sapiens OX=9606 GN=HNRNPM PE=1 SV=3	1	0	0	0	0	0	0.90909
P12277_K304	CKB	LPNLGK*HEK	KCRB_HUMAN Creatine kinase B-type OS=Homo sapiens OX=9606 GN=CKB PE=1 SV=1	1	0	0	0	1	0	0.911405
Q8TDS5_K400	OXER1	K*AEAIGK	OXER1_HUMAN Oxoeicosanoid receptor 1 OS=Homo sapiens OX=9606 GN=OXER1 PE=1 SV=1	1	0	0	1	0	0	1.15375
P13073_K53	COX4I1	DHPLPEVAHVK*HLSASQK	COX41_HUMAN Cytochrome c oxidase subunit 4 isoform 1, mitochondrial OS=Homo sapiens OX=9606 GN=COX4I1 PE=1 SV=1	1	0	0	0	0	0	0.83333
P62269_K47	RPS18	K*ADIDLTKR K*ADIDLTK	RS18_HUMAN 40S ribosomal protein S18 OS=Homo sapiens OX=9606 GN=RPS18 PE=1 SV=3	1	0	0	0	0	0	0.73529
Q99729_K143	HNRNPAB	K*AMAMK	ROAA_HUMAN Heterogeneous nuclear ribonucleoprotein A/B OS=Homo sapiens OX=9606 GN=HNRNPAB PE=1 SV=2	1	0	0	0	0	0	1.31579
P51991_K118	HNRNPA3	EDSVK*PGAHLTVK	ROA3_HUMAN Heterogeneous nuclear ribonucleoprotein A3 OS=Homo sapiens OX=9606 GN=HNRNPA3 PE=1 SV=2	1	0	1	0	0	0	0.87459
P10599_K94	TXN	VGEFSGANK*EK	THIO_HUMAN Thioredoxin OS=Homo sapiens OX=9606 GN=TXN PE=1 SV=3	1	0	0	2	0	1	1.28099
P13667_K637	PDIA4	FIEEHATK*LSR	PDIA4_HUMAN Protein disulfide-isomerase A4 OS=Homo sapiens OX=9606 GN=PDIA4 PE=1 SV=2	1	0	0	0	1	0	1.12156
P62424_K11	RPL7A	K*VAPAPAVVK	RL7A_HUMAN 60S ribosomal protein L7a OS=Homo sapiens OX=9606 GN=RPL7A PE=1 SV=2	1	0	0	0	0	0	1.12646
P05455_K287	SSB	AK*DANNGNLQLR	LA_HUMAN Lupus La protein OS=Homo sapiens OX=9606 GN=SSB PE=1 SV=2	1	0	1	0	0	0	0.82437
P20700_K474	LMNB1	K*IGDTSVSYK	LMNB1_HUMAN Lamin-B1 OS=Homo sapiens OX=9606 GN=LMNB1 PE=1 SV=2	1	0	0	0	0	0	1.11111
P50991_K29	CCT4	DK*PAQIR	TCPD_HUMAN T-complex protein 1 subunit delta OS=Homo sapiens OX=9606 GN=CCT4 PE=1 SV=4	1	0	0	0	0	0	1.20482
O75475_K360	PSIP1	IHAEIK*NSLK	PSIP1_HUMAN PC4 and SFRS1-interacting protein OS=Homo sapiens OX=9606 GN=PSIP1 PE=1 SV=1	1	0	0	0	0	0	0.58824
P49327_K2186	FASN	K*LQELSSK	FAS_HUMAN Fatty acid synthase OS=Homo sapiens OX=9606 GN=FASN PE=1 SV=3	1	0	0	0	0	0	1.44928
Q14257_K24	RCN2	GK*AEELHYPLGER	RCN2_HUMAN Reticulocalbin-2 OS=Homo sapiens OX=9606 GN=RCN2 PE=1 SV=1	1	0	0	0	0	0	0.89286
P25705_K132	ATP5F1A	EGDIVK*R	ATPA_HUMAN ATP synthase subunit alpha, mitochondrial OS=Homo sapiens OX=9606 GN=ATP5F1A PE=1 SV=1	1	0	0	1	0	0	0.96534
P50914_K124	RPL14	IIK*NEVK	RL14_HUMAN 60S ribosomal protein L14 OS=Homo sapiens OX=9606 GN=RPL14 PE=1 SV=4	1	0	0	0	0	0	1.0101
P49368_K249	CCT3	K*GESQTDIEITR	TCPG_HUMAN T-complex protein 1 subunit gamma OS=Homo sapiens OX=9606 GN=CCT3 PE=1 SV=4	1	0	2	0	0	0	0.825543
O00232_K98	PSMD12	SQLK*QAVAK	PSD12_HUMAN 26S proteasome non-ATPase regulatory subunit 12 OS=Homo sapiens OX=9606 GN=PSMD12 PE=1 SV=3	1	0	0	0	0	0	0.9434
Q92841_K109	DDX17	K*FGNPGER	DDX17_HUMAN Probable ATP-dependent RNA helicase DDX17 OS=Homo sapiens OX=9606 GN=DDX17 PE=1 SV=2	1	0	0	0	0	0	0.76923
P46777_K178	RPL5	GAVDGGLSIPHSTK*R	RL5_HUMAN 60S ribosomal protein L5 OS=Homo sapiens OX=9606 GN=RPL5 PE=1 SV=3	1	0	1	0	2	2	0.910377
Q9NPG3_K449	UBN1	LK*EAIGR	UBN1_HUMAN Ubinuclein-1 OS=Homo sapiens OX=9606 GN=UBN1 PE=1 SV=2	1	0	0	0	0	0	0.64103
P62829_K13	RPL23	GGSSGAK*FR	RL23_HUMAN 60S ribosomal protein L23 OS=Homo sapiens OX=9606 GN=RPL23 PE=1 SV=1	1	0	0	2	0	2	0.967038
Q93XM6_K294	TGA9	LK*AVAAK	TGA9_ARATH Transcription factor TGA9 OS=Arabidopsis thaliana OX=3702 GN=TGA9 PE=1 SV=1	1	0	0	0	0	0	1.06383
P67870_K212	CSNK2B	SPVK*TIR	CSK2B_HUMAN Casein kinase II subunit beta OS=Homo sapiens OX=9606 GN=CSNK2B PE=1 SV=1	1	0	0	0	0	0	1.26582
Q00839_K28	HNRNPU	LSDK*GLK	HNRPU_HUMAN Heterogeneous nuclear ribonucleoprotein U OS=Homo sapiens OX=9606 GN=HNRNPU PE=1 SV=6	1	0	0	2	0	0	0.98058
P11940_K620	PABPC1	SKVDEAVAVLQAHQAK*EAAQK	PABP1_HUMAN Polyadenylate-binding protein 1 OS=Homo sapiens OX=9606 GN=PABPC1 PE=1 SV=2	1	0	1	0	0	0	1.05642
Q13247_K182	SRSF6	LIEDK*PR	SRSF6_HUMAN Serine/arginine-rich splicing factor 6 OS=Homo sapiens OX=9606 GN=SRSF6 PE=1 SV=2	1	0	0	0	0	0	1.14943
P23193_K199	TCEA1	ISNLK*DAK	TCEA1_HUMAN Transcription elongation factor A protein 1 OS=Homo sapiens OX=9606 GN=TCEA1 PE=1 SV=2	1	0	0	0	0	0	0.56698
O14602_K104	EIF1AY	SLK*AYGELPEHAK	IF1AY_HUMAN Eukaryotic translation initiation factor 1A, Y-chromosomal OS=Homo sapiens OX=9606 GN=EIF1AY PE=1 SV=4	1	0	1	0	0	0	1.00387
Q15233_K107	NONO	AGEVFIHK*DK	NONO_HUMAN Non-POU domain-containing octamer-binding protein OS=Homo sapiens OX=9606 GN=NONO PE=1 SV=4	1	0	0	0	0	0	1.19048
P53396_K978	ACLY	VK*SINNPDMR	ACLY_HUMAN ATP-citrate synthase OS=Homo sapiens OX=9606 GN=ACLY PE=1 SV=3	1	0	0	0	0	0	1.96078
P46779_K122	RPL28	SQK*PVMVK	RL28_HUMAN 60S ribosomal protein L28 OS=Homo sapiens OX=9606 GN=RPL28 PE=1 SV=3	1	0	0	2	0	0	0.898347
P62424_K131	RPL7A	GDVPTK*RPPVLR	RL7A_HUMAN 60S ribosomal protein L7a OS=Homo sapiens OX=9606 GN=RPL7A PE=1 SV=2	1	0	0	0	0	0	0.84746
Q14152_K603	EIF3A	EAELQK*VR	EIF3A_HUMAN Eukaryotic translation initiation factor 3 subunit A OS=Homo sapiens OX=9606 GN=EIF3A PE=1 SV=1	1	0	0	0	0	0	1.08696
P62241_K26	RPS8	K*YELGR	RS8_HUMAN 40S ribosomal protein S8 OS=Homo sapiens OX=9606 GN=RPS8 PE=1 SV=2	1	0	0	0	0	0	0.75758
Q13242_K169	SRSF9	KLDDTK*FR	SRSF9_HUMAN Serine/arginine-rich splicing factor 9 OS=Homo sapiens OX=9606 GN=SRSF9 PE=1 SV=1	1	0	0	0	0	0	1.17647
P49327_K1704	FASN	VFTTVGSAEK*R	FAS_HUMAN Fatty acid synthase OS=Homo sapiens OX=9606 GN=FASN PE=1 SV=3	1	0	0	0	0	0	0.81967
P12956_K463	XRCC6	MK*AIVEK	XRCC6_HUMAN X-ray repair cross-complementing protein 6 OS=Homo sapiens OX=9606 GN=XRCC6 PE=1 SV=2	1	0	0	0	0	0	1.03093
Q07955_K165	SRSF1	K*EDMTYAVR	SRSF1_HUMAN Serine/arginine-rich splicing factor 1 OS=Homo sapiens OX=9606 GN=SRSF1 PE=1 SV=2	1	0	2	1	0	0	0.787118
P33991_K455	MCM4	K*PDIYER	MCM4_HUMAN DNA replication licensing factor MCM4 OS=Homo sapiens OX=9606 GN=MCM4 PE=1 SV=5	1	0	0	0	0	0	0.6993
P62424_K37	RPL7A	RPK*NFGIGQDIQPK	RL7A_HUMAN 60S ribosomal protein L7a OS=Homo sapiens OX=9606 GN=RPL7A PE=1 SV=2	1	0	0	0	0	0	0.9901
P10809_K196	HSPD1	K*GVITVK	CH60_HUMAN 60 kDa heat shock protein, mitochondrial OS=Homo sapiens OX=9606 GN=HSPD1 PE=1 SV=2	1	0	0	2	0	0	0.869603
P43243_K491	MATR3	FDQK*QELGR	MATR3_HUMAN Matrin-3 OS=Homo sapiens OX=9606 GN=MATR3 PE=1 SV=2	1	0	1	1	0	0	0.912573
Q9BWD1_K170	ACAT2	K*WQVSR	THIC_HUMAN Acetyl-CoA acetyltransferase, cytosolic OS=Homo sapiens OX=9606 GN=ACAT2 PE=1 SV=2	1	0	0	0	0	0	0.83333
P38159_K86	RBMX	VEQATK*PSFESGR	RBMX_HUMAN RNA-binding motif protein, X chromosome OS=Homo sapiens OX=9606 GN=RBMX PE=1 SV=3	1	0	2	0	0	0	0.962707
P23396_K62	RPS3	TQNVLGEK*GR	RS3_HUMAN 40S ribosomal protein S3 OS=Homo sapiens OX=9606 GN=RPS3 PE=1 SV=2	1	0	1	2	0	1	0.833406
Q5BKZ1_K140	ZNF326	SK*LRPGFMEDR	ZN326_HUMAN DBIRD complex subunit ZNF326 OS=Homo sapiens OX=9606 GN=ZNF326 PE=1 SV=2	1	0	0	0	0	0	0.9901
P56192_K491	MARS1	DGLK*PR	SYMC_HUMAN Methionine--tRNA ligase, cytoplasmic OS=Homo sapiens OX=9606 GN=MARS1 PE=1 SV=2	1	0	0	0	2	2	0.920122
Q9BSD7_K73	NTPCR	VGLEPPPGK*R	NTPCR_HUMAN Cancer-related nucleoside-triphosphatase OS=Homo sapiens OX=9606 GN=NTPCR PE=1 SV=1	1	0	0	0	0	0	0.95238
P13639_K605	EEF2	LYMK*AR	EF2_HUMAN Elongation factor 2 OS=Homo sapiens OX=9606 GN=EEF2 PE=1 SV=4	1	0	0	1	0	0	0.77845
P07355_K148	ANXA2	VYK*EMYK	ANXA2_HUMAN Annexin A2 OS=Homo sapiens OX=9606 GN=ANXA2 PE=1 SV=2	1	0	0	0	0	0	0.58824
P0DMV9_K512	HSPA1B	LSK*EEIER	HS71B_HUMAN Heat shock 70 kDa protein 1B OS=Homo sapiens OX=9606 GN=HSPA1B PE=1 SV=1	1	0	1	1	0	1	0.957425
P09661_K172	SNRPA1	GAQLAK*DIAR	RU2A_HUMAN U2 small nuclear ribonucleoprotein A' OS=Homo sapiens OX=9606 GN=SNRPA1 PE=1 SV=2	1	0	0	2	0	1	1.0019
P30153_K107	PPP2R1A	DK*AVESLR	2AAA_HUMAN Serine/threonine-protein phosphatase 2A 65 kDa regulatory subunit A alpha isoform OS=Homo sapiens OX=9606 GN=PPP2R1A PE=1 SV=4	1	0	1	1	0	0	0.80154
P13667_K437	PDIA4	SK*VLEVAK	PDIA4_HUMAN Protein disulfide-isomerase A4 OS=Homo sapiens OX=9606 GN=PDIA4 PE=1 SV=2	1	0	0	0	0	0	1.02041
P31946_K70	YWHAB	VISSIEQK*TER	1433B_HUMAN 14-3-3 protein beta/alpha OS=Homo sapiens OX=9606 GN=YWHAB PE=1 SV=3	1	0	0	2	0	0	0.708517
Q96C36_K284	PYCR2	ISPAALKK*	P5CR2_HUMAN Pyrroline-5-carboxylate reductase 2 OS=Homo sapiens OX=9606 GN=PYCR2 PE=1 SV=1	1	0	0	0	0	0	0.70922
O60749_K248	SNX2	TVK*HPTLLQDPDLR	SNX2_HUMAN Sorting nexin-2 OS=Homo sapiens OX=9606 GN=SNX2 PE=1 SV=2	1	0	0	0	0	0	1.19048
P39023_K300	RPL3	LIK*NNASTDYDLSDK	RL3_HUMAN 60S ribosomal protein L3 OS=Homo sapiens OX=9606 GN=RPL3 PE=1 SV=2	1	0	1	0	0	0	1.34282
Q02878_K94	RPL6	VLATVTK*PVGGDK	RL6_HUMAN 60S ribosomal protein L6 OS=Homo sapiens OX=9606 GN=RPL6 PE=1 SV=3	1	0	0	0	0	0	1.26582
P19338_K513	NCL	ATFIK*VPQNQNGK	NUCL_HUMAN Nucleolin OS=Homo sapiens OX=9606 GN=NCL PE=1 SV=3	1	0	0	0	0	0	0.73529
P78371_K119	CCT2	EAESLIAK*K	TCPB_HUMAN T-complex protein 1 subunit beta OS=Homo sapiens OX=9606 GN=CCT2 PE=1 SV=4	1	0	0	0	0	0	1.19048
Q01105_K172	SET	STEIK*WK	SET_HUMAN Protein SET OS=Homo sapiens OX=9606 GN=SET PE=1 SV=3	1	0	0	0	2	0	0.912877
P43243_K181	MATR3	DDWEEK*R	MATR3_HUMAN Matrin-3 OS=Homo sapiens OX=9606 GN=MATR3 PE=1 SV=2	1	0	0	2	0	1	1.08773
P12277_K313	CKB	FSEVLK*R	KCRB_HUMAN Creatine kinase B-type OS=Homo sapiens OX=9606 GN=CKB PE=1 SV=1	1	0	0	0	0	1	0.576605
P36578_K333	RPL4	LNPYAK*TMR	RL4_HUMAN 60S ribosomal protein L4 OS=Homo sapiens OX=9606 GN=RPL4 PE=1 SV=5	1	0	0	0	0	0	0.81967
Q15181_K22	PPA1	VFLK*NEK	IPYR_HUMAN Inorganic pyrophosphatase OS=Homo sapiens OX=9606 GN=PPA1 PE=1 SV=2	1	0	0	0	0	0	0.96154
P39023_K356	RPL3	SLLVQTK*R	RL3_HUMAN 60S ribosomal protein L3 OS=Homo sapiens OX=9606 GN=RPL3 PE=1 SV=2	1	0	0	0	0	0	1.13636
Q9NR31_K146	SAR1A	TDAISEEK*LR	SAR1A_HUMAN GTP-binding protein SAR1a OS=Homo sapiens OX=9606 GN=SAR1A PE=1 SV=1	1	0	0	0	0	0	0.86957
Q16629_K70	SRSF7	GLDGK*VICGSR	SRSF7_HUMAN Serine/arginine-rich splicing factor 7 OS=Homo sapiens OX=9606 GN=SRSF7 PE=1 SV=1	1	0	0	0	0	0	0.96154
P20700_K271	LMNB1	LYKEELEQTYHAK*LENAR	LMNB1_HUMAN Lamin-B1 OS=Homo sapiens OX=9606 GN=LMNB1 PE=1 SV=2	1	0	0	0	1	0	1.03768
P62917_K234	RPL8	K*VGLIAAR	RL8_HUMAN 60S ribosomal protein L8 OS=Homo sapiens OX=9606 GN=RPL8 PE=1 SV=2	1	0	0	0	0	0	1.16279
Q93050_K70	ATP6V0A1	FVEK*EIR	VPP1_HUMAN V-type proton ATPase 116 kDa subunit a1 OS=Homo sapiens OX=9606 GN=ATP6V0A1 PE=1 SV=3	1	0	0	0	0	0	1.40845
Q92499_K317	DDX1	YIDNPK*LR	DDX1_HUMAN ATP-dependent RNA helicase DDX1 OS=Homo sapiens OX=9606 GN=DDX1 PE=1 SV=2	1	0	0	0	0	0	0.88496
P49959_K384	MRE11	FSQK*FVDR	MRE11_HUMAN Double-strand break repair protein MRE11 OS=Homo sapiens OX=9606 GN=MRE11 PE=1 SV=3	1	0	0	0	0	0	1.13636
O75533_K1025	SF3B1	LTPILK*NR	SF3B1_HUMAN Splicing factor 3B subunit 1 OS=Homo sapiens OX=9606 GN=SF3B1 PE=1 SV=3	1	0	0	1	0	0	0.917885
P62750_K70	RPL23A	NK*LDHYAIIK	RL23A_HUMAN 60S ribosomal protein L23a OS=Homo sapiens OX=9606 GN=RPL23A PE=1 SV=1	1	0	0	0	0	0	0.8
Q15019_K190	SEPTIN2	ADTLTLK*ER	SEPT2_HUMAN Septin-2 OS=Homo sapiens OX=9606 GN=SEPTIN2 PE=1 SV=1	1	0	0	0	0	0	0.89286
P05023_K508	ATP1A1	NPNTSEPQHLLVMK*GAPER	AT1A1_HUMAN Sodium/potassium-transporting ATPase subunit alpha-1 OS=Homo sapiens OX=9606 GN=ATP1A1 PE=1 SV=1	1	0	0	0	0	0	0.72993
Q15084_K66	PDIA6	LTPEWK*K	PDIA6_HUMAN Protein disulfide-isomerase A6 OS=Homo sapiens OX=9606 GN=PDIA6 PE=1 SV=1	1	0	0	1	0	0	0.823935
P63279_K18	UBE2I	K*DHPFGFVAVPTK	UBC9_HUMAN SUMO-conjugating enzyme UBC9 OS=Homo sapiens OX=9606 GN=UBE2I PE=1 SV=1	1	0	0	0	0	0	0.97087
Q12931_K332	TRAP1	YTLHYK*TDAPLNIR	TRAP1_HUMAN Heat shock protein 75 kDa, mitochondrial OS=Homo sapiens OX=9606 GN=TRAP1 PE=1 SV=3	1	0	0	0	0	0	1.23457
P61247_K182	RPS3A	EVQTNDLK*EVVNK	RS3A_HUMAN 40S ribosomal protein S3a OS=Homo sapiens OX=9606 GN=RPS3A PE=1 SV=2	1	0	0	1	0	0	1.02628
P09874_K524	PARP1	MK*LTLK	PARP1_HUMAN Poly [ADP-ribose] polymerase 1 OS=Homo sapiens OX=9606 GN=PARP1 PE=1 SV=4	1	0	0	0	0	0	1.28205
Q14692_K674	BMS1	K*AAEAFLR	BMS1_HUMAN Ribosome biogenesis protein BMS1 homolog OS=Homo sapiens OX=9606 GN=BMS1 PE=1 SV=1	1	0	0	0	0	0	1.04167
Q12905_K186	ILF2	K*LDPELHLDIK	ILF2_HUMAN Interleukin enhancer-binding factor 2 OS=Homo sapiens OX=9606 GN=ILF2 PE=1 SV=2	1	0	0	0	0	0	1.2987
P08670_K104	VIM	TNEK*VELQELNDR	VIME_HUMAN Vimentin OS=Homo sapiens OX=9606 GN=VIM PE=1 SV=4	1	0	1	1	0	1	1.03814
P31948_K239	STIP1	K*DFDTALK	STIP1_HUMAN Stress-induced-phosphoprotein 1 OS=Homo sapiens OX=9606 GN=STIP1 PE=1 SV=1	1	0	0	0	0	0	1
P07814_K666	EPRS1	K*GDIIQLQR	SYEP_HUMAN Bifunctional glutamate/proline--tRNA ligase OS=Homo sapiens OX=9606 GN=EPRS1 PE=1 SV=5	1	0	0	0	0	0	0.68493
P51991_K127	HNRNPA3	K*IFVGGIKEDTEEYNLR	ROA3_HUMAN Heterogeneous nuclear ribonucleoprotein A3 OS=Homo sapiens OX=9606 GN=HNRNPA3 PE=1 SV=2	1	0	0	0	0	0	1.1236
Q13838_K334	DDX39B	YQQFK*DFQR	DX39B_HUMAN Spliceosome RNA helicase DDX39B OS=Homo sapiens OX=9606 GN=DDX39B PE=1 SV=1	1	0	1	1	1	0	0.89071
P17812_K466	CTPS1	K*LYGDADYLEER	PYRG1_HUMAN CTP synthase 1 OS=Homo sapiens OX=9606 GN=CTPS1 PE=1 SV=2	1	0	0	0	0	0	1.25
P29401_K543	TKT	K*LILDSAR	TKT_HUMAN Transketolase OS=Homo sapiens OX=9606 GN=TKT PE=1 SV=3	1	0	0	0	0	0	1.03185
Q15233_K96	NONO	LFEK*YGK	NONO_HUMAN Non-POU domain-containing octamer-binding protein OS=Homo sapiens OX=9606 GN=NONO PE=1 SV=4	1	0	0	2	0	0	0.86202
P14314_K158	PRKCSH	K*LIELQAGK	GLU2B_HUMAN Glucosidase 2 subunit beta OS=Homo sapiens OX=9606 GN=PRKCSH PE=1 SV=2	1	0	0	0	0	0	1.06383
P25685_K3	DNAJB1	GK*DYYQTLGLAR	DNJB1_HUMAN DnaJ homolog subfamily B member 1 OS=Homo sapiens OX=9606 GN=DNAJB1 PE=1 SV=4	1	0	0	0	0	0	0.84746
P40926_K301	MDH2	GIEK*NLGIGK	MDHM_HUMAN Malate dehydrogenase, mitochondrial OS=Homo sapiens OX=9606 GN=MDH2 PE=1 SV=3	1	0	0	1	0	0	1.17512
P06733_K126	ENO1	AGAVEK*GVPLYR	ENOA_HUMAN Alpha-enolase OS=Homo sapiens OX=9606 GN=ENO1 PE=1 SV=2	1	0	1	2	0	0	0.99263
P61353_K98	RPL27	TVVNK*DVFRDPALK	RL27_HUMAN 60S ribosomal protein L27 OS=Homo sapiens OX=9606 GN=RPL27 PE=1 SV=2	1	0	0	0	0	0	1.13636
P61158_K348	ACTR3	LK*LSEELSGGR	ARP3_HUMAN Actin-related protein 3 OS=Homo sapiens OX=9606 GN=ACTR3 PE=1 SV=3	1	0	0	0	0	0	0.77519
Q5JTV8_K578	TOR1AIP1	ISHLVLPVQPENALK*R	TOIP1_HUMAN Torsin-1A-interacting protein 1 OS=Homo sapiens OX=9606 GN=TOR1AIP1 PE=1 SV=2	1	0	0	0	0	0	1.05263
Q9BTT0_K6	ANP32E	K*INLELR	AN32E_HUMAN Acidic leucine-rich nuclear phosphoprotein 32 family member E OS=Homo sapiens OX=9606 GN=ANP32E PE=1 SV=1	1	0	0	0	0	0	0.90909
P61247_K20	RPS3A	K*VVDPFSK	RS3A_HUMAN 40S ribosomal protein S3a OS=Homo sapiens OX=9606 GN=RPS3A PE=1 SV=2	1	0	0	0	0	0	0.79365
P10809_K523	HSPD1	GIIDPTK*VVR	CH60_HUMAN 60 kDa heat shock protein, mitochondrial OS=Homo sapiens OX=9606 GN=HSPD1 PE=1 SV=2	1	0	0	2	0	2	0.98349
P61247_K167	RPS3A	K*MMEIMTR	RS3A_HUMAN 40S ribosomal protein S3a OS=Homo sapiens OX=9606 GN=RPS3A PE=1 SV=2	1	0	0	0	0	0	0.93458
P09104_K256	ENO2	DGK*YDLDFK	ENOG_HUMAN Gamma-enolase OS=Homo sapiens OX=9606 GN=ENO2 PE=1 SV=3	1	0	0	0	0	0	0.72993
P52565_K52	ARHGDIA	YK*EALLGR	GDIR1_HUMAN Rho GDP-dissociation inhibitor 1 OS=Homo sapiens OX=9606 GN=ARHGDIA PE=1 SV=3	1	0	2	0	0	0	0.904193
P08670_K143	VIM	ILLAELEQLKGQGK*SR	VIME_HUMAN Vimentin OS=Homo sapiens OX=9606 GN=VIM PE=1 SV=4	1	0	0	0	0	0	0.98039
P47756_K223	CAPZB	LVEDMENK*IR	CAPZB_HUMAN F-actin-capping protein subunit beta OS=Homo sapiens OX=9606 GN=CAPZB PE=1 SV=4	1	0	0	1	0	0	0.898795
Q9Y3C8_K33	UFC1	LK*EEYQSLIR	UFC1_HUMAN Ubiquitin-fold modifier-conjugating enzyme 1 OS=Homo sapiens OX=9606 GN=UFC1 PE=1 SV=3	1	0	0	0	0	0	1.0101
P15311_K344	EZR	EK*EELMLR	EZRI_HUMAN Ezrin OS=Homo sapiens OX=9606 GN=EZR PE=1 SV=4	1	0	2	0	0	0	1.27834
P07900_K443	HSP90AA1	FYEQFSK*NIK	HS90A_HUMAN Heat shock protein HSP 90-alpha OS=Homo sapiens OX=9606 GN=HSP90AA1 PE=1 SV=5	1	0	0	2	0	1	1.40427
P46060_K279	RANGAP1	SK*GAVAIADAIR	RAGP1_HUMAN Ran GTPase-activating protein 1 OS=Homo sapiens OX=9606 GN=RANGAP1 PE=1 SV=1	1	0	0	1	0	0	0.749085
P39023_K362	RPL3	ALEK*IDLK	RL3_HUMAN 60S ribosomal protein L3 OS=Homo sapiens OX=9606 GN=RPL3 PE=1 SV=2	1	0	0	0	0	0	1.21951
P25787_K171	PSMA2	NYVNGK*TFLEK	PSA2_HUMAN Proteasome subunit alpha type-2 OS=Homo sapiens OX=9606 GN=PSMA2 PE=1 SV=2	1	0	0	0	0	0	1.25
P78527_K2908	PRKDC	LLPAELPAK*R	PRKDC_HUMAN DNA-dependent protein kinase catalytic subunit OS=Homo sapiens OX=9606 GN=PRKDC PE=1 SV=3	1	0	0	2	0	0	0.91667
Q14566_K205	MCM6	FVDFQK*VR	MCM6_HUMAN DNA replication licensing factor MCM6 OS=Homo sapiens OX=9606 GN=MCM6 PE=1 SV=1	1	0	0	2	0	1	0.82013
P47914_K38	RPL29	GVDPK*FLR	RL29_HUMAN 60S ribosomal protein L29 OS=Homo sapiens OX=9606 GN=RPL29 PE=1 SV=2	1	0	0	1	0	1	0.94384
P00558_K361	PGK1	ALMDEVVK*ATSR	PGK1_HUMAN Phosphoglycerate kinase 1 OS=Homo sapiens OX=9606 GN=PGK1 PE=1 SV=3	1	0	0	0	0	0	2.32558
Q02878_K207	RPL6	#VALUE!	RL6_HUMAN 60S ribosomal protein L6 OS=Homo sapiens OX=9606 GN=RPL6 PE=1 SV=3	1	0	0	0	0	0	0.56818
P14314_K385	PRKCSH	SLK*DMEESIR	GLU2B_HUMAN Glucosidase 2 subunit beta OS=Homo sapiens OX=9606 GN=PRKCSH PE=1 SV=2	1	0	0	0	0	0	0.84746
P15880_K65	RPS2	AEDKEWMPVTK*LGR	RS2_HUMAN 40S ribosomal protein S2 OS=Homo sapiens OX=9606 GN=RPS2 PE=1 SV=2	1	0	0	1	0	0	1.17009
P27797_K159	CALR	NVLINK*DIR	CALR_HUMAN Calreticulin OS=Homo sapiens OX=9606 GN=CALR PE=1 SV=1	1	0	0	0	0	0	1.17712
P12277_K247	CKB	GGNMK*EVFTR	KCRB_HUMAN Creatine kinase B-type OS=Homo sapiens OX=9606 GN=CKB PE=1 SV=1	1	0	0	0	0	0	1
O00571_K118	DDX3X	SGFGK*FER	DDX3X_HUMAN ATP-dependent RNA helicase DDX3X OS=Homo sapiens OX=9606 GN=DDX3X PE=1 SV=3	1	0	0	2	2	0	0.91547
P84243_K123	H3-3A	VTIMPK*DIQLAR	H33_HUMAN Histone H3.3 OS=Homo sapiens OX=9606 GN=H3-3A PE=1 SV=2	1	1	1	1	0	1	0.897876
P61254_K36	RPL26	IMSSPLSK*ELR	RL26_HUMAN 60S ribosomal protein L26 OS=Homo sapiens OX=9606 GN=RPL26 PE=1 SV=1	1	0	0	0	0	0	0.65359
Q9Y3C8_K17	UFC1	VVSEIPVLK*TNAGPR	UFC1_HUMAN Ubiquitin-fold modifier-conjugating enzyme 1 OS=Homo sapiens OX=9606 GN=UFC1 PE=1 SV=3	1	0	0	0	0	0	0.76336
P52292_K108	KPNA2	EK*QPPIDNIIR	IMA1_HUMAN Importin subunit alpha-1 OS=Homo sapiens OX=9606 GN=KPNA2 PE=1 SV=1	1	0	0	0	0	0	0.98039
Q14980_K1475	NUMA1	EK*YVQELAAVR	NUMA1_HUMAN Nuclear mitotic apparatus protein 1 OS=Homo sapiens OX=9606 GN=NUMA1 PE=1 SV=2	1	0	0	0	0	0	0.92593
O00422_K24	SAP18	EK*TCPLLLR	SAP18_HUMAN Histone deacetylase complex subunit SAP18 OS=Homo sapiens OX=9606 GN=SAP18 PE=1 SV=1	1	0	0	0	0	0	1.07527
P38646_K143	HSPA9	NVPFK*IVR	GRP75_HUMAN Stress-70 protein, mitochondrial OS=Homo sapiens OX=9606 GN=HSPA9 PE=1 SV=2	1	0	0	0	0	0	0.74074
P25705_K175	ATP5F1A	VGLK*APGIIPR	ATPA_HUMAN ATP synthase subunit alpha, mitochondrial OS=Homo sapiens OX=9606 GN=ATP5F1A PE=1 SV=1	1	0	0	0	2	2	0.911792
P04080_K91	CSTB	AK*HDELTYF	CYTB_HUMAN Cystatin-B OS=Homo sapiens OX=9606 GN=CSTB PE=1 SV=2	1	0	0	1	2	0	0.924403
P11021_K370	HSPA5	IPK*IQQLVK	BIP_HUMAN Endoplasmic reticulum chaperone BiP OS=Homo sapiens OX=9606 GN=HSPA5 PE=1 SV=2	1	0	0	0	0	0	1.2987
P43487_K68	RANBP1	FASENDLPEWK*ER	RANG_HUMAN Ran-specific GTPase-activating protein OS=Homo sapiens OX=9606 GN=RANBP1 PE=1 SV=1	1	0	0	0	0	0	1.17647
P53396_K97	ACLY	LGQEATVGK*ATGFLK	ACLY_HUMAN ATP-citrate synthase OS=Homo sapiens OX=9606 GN=ACLY PE=1 SV=3	1	0	0	0	0	0	0.9901
Q99832_K47	CCT7	GMDK*LIVDGR	TCPH_HUMAN T-complex protein 1 subunit eta OS=Homo sapiens OX=9606 GN=CCT7 PE=1 SV=2	1	0	0	0	0	0	1.20482
P19338_K398	NCL	TLLAK*NLPYK	NUCL_HUMAN Nucleolin OS=Homo sapiens OX=9606 GN=NCL PE=1 SV=3	1	0	2	2	2	0	0.883964
P06744_K524	GPI	K*IEPELDGSAQVTSHDASTNGLINFIK	G6PI_HUMAN Glucose-6-phosphate isomerase OS=Homo sapiens OX=9606 GN=GPI PE=1 SV=4	1	0	0	0	0	0	1.88679
Q7L014_K577	DDX46	ILSK*PIEVQVGGR	DDX46_HUMAN Probable ATP-dependent RNA helicase DDX46 OS=Homo sapiens OX=9606 GN=DDX46 PE=1 SV=2	1	0	0	0	0	0	1.08696
P07814_K1421	EPRS1	ASEDLK*THMVVANTMEDFQK	SYEP_HUMAN Bifunctional glutamate/proline--tRNA ligase OS=Homo sapiens OX=9606 GN=EPRS1 PE=1 SV=5	1	0	0	0	0	0	1.25
P62753_K149	RPS6	LFNLSK*EDDVR	RS6_HUMAN 40S ribosomal protein S6 OS=Homo sapiens OX=9606 GN=RPS6 PE=1 SV=1	1	0	0	0	0	0	0.93458
P32969_K174	RPL9	K*FLDGIYVSEK	RL9_HUMAN 60S ribosomal protein L9 OS=Homo sapiens OX=9606 GN=RPL9 PE=1 SV=1	1	0	1	0	0	0	0.934705
P84243_K80	H3-3A	EIAQDFK*TDLR	H33_HUMAN Histone H3.3 OS=Homo sapiens OX=9606 GN=H3-3A PE=1 SV=2	1	1	1	1	1	1	0.84358
Q86UP2_K487	KTN1	NAEQAATQLK*VQLQEAERR	KTN1_HUMAN Kinectin OS=Homo sapiens OX=9606 GN=KTN1 PE=1 SV=1	1	0	0	0	0	0	0.96154
Q9BXP5_K176	SRRT	YNDYK*LDFR	SRRT_HUMAN Serrate RNA effector molecule homolog OS=Homo sapiens OX=9606 GN=SRRT PE=1 SV=1	1	0	0	0	0	0	0.92593
Q14683_K437	SMC1A	IEK*LEEYITTSK	SMC1A_HUMAN Structural maintenance of chromosomes protein 1A OS=Homo sapiens OX=9606 GN=SMC1A PE=1 SV=2	1	0	0	0	0	0	0.84034
P00558_K156	PGK1	ASLSK*LGDVYVNDAFGTAHR	PGK1_HUMAN Phosphoglycerate kinase 1 OS=Homo sapiens OX=9606 GN=PGK1 PE=1 SV=3	1	0	0	0	0	0	1.1236
O15067_K639	PFAS	K*EFFLQR	PUR4_HUMAN Phosphoribosylformylglycinamidine synthase OS=Homo sapiens OX=9606 GN=PFAS PE=1 SV=4	1	0	0	0	0	0	0.80645
Q00610_K367	CLTC	K*FNALFAQGNYSEAAK	CLH1_HUMAN Clathrin heavy chain 1 OS=Homo sapiens OX=9606 GN=CLTC PE=1 SV=5	1	0	0	0	0	0	1.5873
P31153_K350	MAT2A	ELLEIVK*K	METK2_HUMAN S-adenosylmethionine synthase isoform type-2 OS=Homo sapiens OX=9606 GN=MAT2A PE=1 SV=1	1	0	0	1	0	0	1.22449
P11413_K171	G6PD	IIVEK*PFGR	G6PD_HUMAN Glucose-6-phosphate 1-dehydrogenase OS=Homo sapiens OX=9606 GN=G6PD PE=1 SV=4	1	0	0	0	0	0	1.08696
P62424_K34	RPL7A	VVNPLFEK*R	RL7A_HUMAN 60S ribosomal protein L7a OS=Homo sapiens OX=9606 GN=RPL7A PE=1 SV=2	1	0	0	2	0	1	1.02288
P10606_K57	COX5B	K*GLDPYNVLAPK	COX5B_HUMAN Cytochrome c oxidase subunit 5B, mitochondrial OS=Homo sapiens OX=9606 GN=COX5B PE=1 SV=2	1	0	0	0	0	0	0.64935
P36578_K259	RPL4	K*LDELYGTWR	RL4_HUMAN 60S ribosomal protein L4 OS=Homo sapiens OX=9606 GN=RPL4 PE=1 SV=5	1	0	2	0	0	0	1.14005
P52209_K59	PGD	VVGAQSLK*EMVSK	6PGD_HUMAN 6-phosphogluconate dehydrogenase, decarboxylating OS=Homo sapiens OX=9606 GN=PGD PE=1 SV=3	1	0	0	0	0	0	0.88496
P13639_K498	EEF2	VMK*FSVSPVVR	EF2_HUMAN Elongation factor 2 OS=Homo sapiens OX=9606 GN=EEF2 PE=1 SV=4	1	0	0	0	0	0	1.25
Q9UKV3_K81	ACIN1	VTDLK*AALEQR	ACINU_HUMAN Apoptotic chromatin condensation inducer in the nucleus OS=Homo sapiens OX=9606 GN=ACIN1 PE=1 SV=2	1	0	0	1	0	1	1.03744
P35579_K1492	MYH9	ALEEAMEQK*AELER	MYH9_HUMAN Myosin-9 OS=Homo sapiens OX=9606 GN=MYH9 PE=1 SV=4	1	0	0	1	0	0	0.90875
P54136_K557	RARS1	LANIDEEMLQK*AAR	SYRC_HUMAN Arginine--tRNA ligase, cytoplasmic OS=Homo sapiens OX=9606 GN=RARS1 PE=1 SV=2	1	0	0	0	0	0	0.6993
Q2TAY7_K107	SMU1	QTDPMIMLK*QTQPER	SMU1_HUMAN WD40 repeat-containing protein SMU1 OS=Homo sapiens OX=9606 GN=SMU1 PE=1 SV=2	1	0	0	0	0	0	1.20482
Q12931_K96	TRAP1	K*LLDIVAR	TRAP1_HUMAN Heat shock protein 75 kDa, mitochondrial OS=Homo sapiens OX=9606 GN=TRAP1 PE=1 SV=3	1	0	0	0	0	0	1.0101
O00571_K491	DDX3X	SGK*SPILVATAVAAR	DDX3X_HUMAN ATP-dependent RNA helicase DDX3X OS=Homo sapiens OX=9606 GN=DDX3X PE=1 SV=3	1	0	0	0	0	0	0.88496
O00487_K152	PSMD14	AVAVVVDPIQSVK*GK	PSDE_HUMAN 26S proteasome non-ATPase regulatory subunit 14 OS=Homo sapiens OX=9606 GN=PSMD14 PE=1 SV=1	1	0	0	0	0	0	1.1236
P22234_K19	PAICS	TK*EVYELLDSPGK	PUR6_HUMAN Multifunctional protein ADE2 OS=Homo sapiens OX=9606 GN=PAICS PE=1 SV=3	1	0	0	0	0	0	0.84034
P11940_K312	PABPC1	K*EFSPFGTITSAK	PABP1_HUMAN Polyadenylate-binding protein 1 OS=Homo sapiens OX=9606 GN=PABPC1 PE=1 SV=2	1	0	2	0	0	0	1.0495
P04406_K139	GAPDH	VIISAPSADAPMFVMGVNHEK*YDNSLK	G3P_HUMAN Glyceraldehyde-3-phosphate dehydrogenase OS=Homo sapiens OX=9606 GN=GAPDH PE=1 SV=3	1	0	0	0	0	0	1.03093
Q92922_K716	SMARCC1	VASAAAK*AALEEFSR	SMRC1_HUMAN SWI/SNF complex subunit SMARCC1 OS=Homo sapiens OX=9606 GN=SMARCC1 PE=1 SV=3	1	0	0	0	0	0	1.17647
P05141_K245	SLC25A5	K*GTDIMYTGTLDCWR	ADT2_HUMAN ADP/ATP translocase 2 OS=Homo sapiens OX=9606 GN=SLC25A5 PE=1 SV=7	1	0	1	0	0	0	1.10461
P31948_K364	STIP1	LAYINPDLALEEK*NK	STIP1_HUMAN Stress-induced-phosphoprotein 1 OS=Homo sapiens OX=9606 GN=STIP1 PE=1 SV=1	1	0	0	0	0	0	0.83333
P62913_K38	RPL11	AAK*VLEQLTGQTPVFSK	RL11_HUMAN 60S ribosomal protein L11 OS=Homo sapiens OX=9606 GN=RPL11 PE=1 SV=2	1	0	0	0	0	0	0.89286
P35637_K365	FUS	EFSGNPIK*VSFATR	FUS_HUMAN RNA-binding protein FUS OS=Homo sapiens OX=9606 GN=FUS PE=1 SV=1	1	0	0	0	0	0	1.5873
Q9UBB4_K371	ATXN10	AEGDISNVANGFK*SHLIR	ATX10_HUMAN Ataxin-10 OS=Homo sapiens OX=9606 GN=ATXN10 PE=1 SV=1	1	0	0	0	0	0	0.97087
Q9BRA2_K89	TXNDC17	NLK*VTAVPTLLK	TXD17_HUMAN Thioredoxin domain-containing protein 17 OS=Homo sapiens OX=9606 GN=TXNDC17 PE=1 SV=1	1	0	0	0	0	0	1.11111
O75396_K38	SEC22B	DLQQYQSQAK*QLFR	SC22B_HUMAN Vesicle-trafficking protein SEC22b OS=Homo sapiens OX=9606 GN=SEC22B PE=1 SV=4	1	0	0	0	0	0	0.8547
P05023_K773	ATP1A1	LIFDNLK*K	AT1A1_HUMAN Sodium/potassium-transporting ATPase subunit alpha-1 OS=Homo sapiens OX=9606 GN=ATP1A1 PE=1 SV=1	1	0	0	0	0	0	1.40845
Q00839_K551	HNRNPU	QMADTGK*LNTLLQR	HNRPU_HUMAN Heterogeneous nuclear ribonucleoprotein U OS=Homo sapiens OX=9606 GN=HNRNPU PE=1 SV=6	1	0	0	0	0	0	1.03093
P42167_K303	TMPO	VTGNFK*HASPILPITEFSDIPR	LAP2B_HUMAN Lamina-associated polypeptide 2, isoforms beta/gamma OS=Homo sapiens OX=9606 GN=TMPO PE=1 SV=2	1	0	0	0	1	0	0.919575
O75934_K85	BCAS2	QPIELLSMK*R	SPF27_HUMAN Pre-mRNA-splicing factor SPF27 OS=Homo sapiens OX=9606 GN=BCAS2 PE=1 SV=1	1	0	0	0	0	0	0.87719
P06493_K56	CDK1	EISLLK*ELR	CDK1_HUMAN Cyclin-dependent kinase 1 OS=Homo sapiens OX=9606 GN=CDK1 PE=1 SV=3	1	0	0	0	0	0	0.9901
P33991_K858	MCM4	ALADDDFLTVTGK*TVR	MCM4_HUMAN DNA replication licensing factor MCM4 OS=Homo sapiens OX=9606 GN=MCM4 PE=1 SV=5	1	0	0	0	0	0	0.47847
P40926_K74	MDH2	LTLYDIAHTPGVAADLSHIETK*AAVK	MDHM_HUMAN Malate dehydrogenase, mitochondrial OS=Homo sapiens OX=9606 GN=MDH2 PE=1 SV=3	1	0	0	0	1	0	1.08844
Q9BVK6_K160	TMED9	DK*LSELQLR	TMED9_HUMAN Transmembrane emp24 domain-containing protein 9 OS=Homo sapiens OX=9606 GN=TMED9 PE=1 SV=2	1	0	0	0	0	1	1.04884
Q06830_K120	PRDX1	TIAQDYGVLK*ADEGISFR	PRDX1_HUMAN Peroxiredoxin-1 OS=Homo sapiens OX=9606 GN=PRDX1 PE=1 SV=1	1	0	0	0	0	2	0.716923
P13667_K119	PDIA4	DKDPPIPVAK*IDATSASVLASR	PDIA4_HUMAN Protein disulfide-isomerase A4 OS=Homo sapiens OX=9606 GN=PDIA4 PE=1 SV=2	1	0	0	0	0	0	1.38889
P49368_K425	CCT3	NVLLDPQLVPGGGASEMAVAHALTEK*SK	TCPG_HUMAN T-complex protein 1 subunit gamma OS=Homo sapiens OX=9606 GN=CCT3 PE=1 SV=4	1	0	0	0	0	0	0.88496
P51991_K151	HNRNPA3	YGK*IETIEVMEDR	ROA3_HUMAN Heterogeneous nuclear ribonucleoprotein A3 OS=Homo sapiens OX=9606 GN=HNRNPA3 PE=1 SV=2	1	0	0	0	0	0	1.20482
P08621_K27	SNRNP70	DPIPYLPPLEK*LPHEK	RU17_HUMAN U1 small nuclear ribonucleoprotein 70 kDa OS=Homo sapiens OX=9606 GN=SNRNP70 PE=1 SV=2	1	0	0	0	0	0	0.92826
Q14691_K63	GINS1	SDLIPTIK*FR	PSF1_HUMAN DNA replication complex GINS protein PSF1 OS=Homo sapiens OX=9606 GN=GINS1 PE=1 SV=1	1	0	0	0	0	0	1.02041
P10809_K352	HSPD1	VGEVIVTK*DDAMLLK	CH60_HUMAN 60 kDa heat shock protein, mitochondrial OS=Homo sapiens OX=9606 GN=HSPD1 PE=1 SV=2	1	0	1	0	0	0	0.85503
P26641_K294	EEF1G	STFVLDEFK*R	EF1G_HUMAN Elongation factor 1-gamma OS=Homo sapiens OX=9606 GN=EEF1G PE=1 SV=3	1	0	0	0	0	1	1.40555
P23284_K98	PPIB	VIK*DFMIQGGDFTR	PPIB_HUMAN Peptidyl-prolyl cis-trans isomerase B OS=Homo sapiens OX=9606 GN=PPIB PE=1 SV=2	1	0	0	0	0	0	1.40845
Q8N1F7_K106	NUP93	NEK*DNALLSAIEESR	NUP93_HUMAN Nuclear pore complex protein Nup93 OS=Homo sapiens OX=9606 GN=NUP93 PE=1 SV=2	1	0	0	0	0	0	1.53846
P07108_K55	DBI	AK*WDAWNELK	ACBP_HUMAN Acyl-CoA-binding protein OS=Homo sapiens OX=9606 GN=DBI PE=1 SV=2	1	0	0	0	0	0	0.9434
P0DMV9_K539	HSPA1B	VSAK*NALESYAFNMK	HS71B_HUMAN Heat shock 70 kDa protein 1B OS=Homo sapiens OX=9606 GN=HSPA1B PE=1 SV=1	1	0	0	0	0	0	1.21951
P04843_K281	RPN1	SFK*TILPAAAQDVYYR	RPN1_HUMAN Dolichyl-diphosphooligosaccharide--protein glycosyltransferase subunit 1 OS=Homo sapiens OX=9606 GN=RPN1 PE=1 SV=1	1	0	0	0	0	0	0.72464
P61978_K456	HNRNPK	IITITGTQDQIQNAQYLLQNSVK*QYSGK	HNRPK_HUMAN Heterogeneous nuclear ribonucleoprotein K OS=Homo sapiens OX=9606 GN=HNRNPK PE=1 SV=1	1	0	0	1	0	0	1.15657
A0A1B0GUW6_K1168	SPEM3	DK*CEALSPR	SPEM3_HUMAN Uncharacterized protein SPEM3 OS=Homo sapiens OX=9606 GN=SPEM3 PE=3 SV=1	1	0	0	0	0	0	1.49254
P63220_K16	RPS21	K*CSASNR	RS21_HUMAN 40S ribosomal protein S21 OS=Homo sapiens OX=9606 GN=RPS21 PE=1 SV=1	1	0	1	1	0	1	0.805505
P22234_K47	PAICS	K*NHLEGK	PUR6_HUMAN Multifunctional protein ADE2 OS=Homo sapiens OX=9606 GN=PAICS PE=1 SV=3	1	0	0	1	0	0	1.04167
Q5VTE0_K444	EEF1A1P5	K*AAGAGK	EF1A3_HUMAN Putative elongation factor 1-alpha-like 3 OS=Homo sapiens OX=9606 GN=EEF1A1P5 PE=5 SV=1	1	0	0	0	0	0	1.11244
P22626_K112	HNRNPA2B1	EESGKPGAHVTVK*K	ROA2_HUMAN Heterogeneous nuclear ribonucleoproteins A2/B1 OS=Homo sapiens OX=9606 GN=HNRNPA2B1 PE=1 SV=2	1	0	0	0	0	0	0.8547
Q01105_K189	SET	SSQTQNK*ASR	SET_HUMAN Protein SET OS=Homo sapiens OX=9606 GN=SET PE=1 SV=3	1	0	0	1	1	0	0.985563
P52272_K145	HNRNPM	VK*EDPDGEHAR	HNRPM_HUMAN Heterogeneous nuclear ribonucleoprotein M OS=Homo sapiens OX=9606 GN=HNRNPM PE=1 SV=3	1	0	0	0	0	0	5
P84098_K82	RPL19	K*GTANAR	RL19_HUMAN 60S ribosomal protein L19 OS=Homo sapiens OX=9606 GN=RPL19 PE=1 SV=1	1	0	0	2	0	0	1.08506
P07900_K485	HSP90AA1	MK*ENQK	HS90A_HUMAN Heat shock protein HSP 90-alpha OS=Homo sapiens OX=9606 GN=HSP90AA1 PE=1 SV=5	1	0	0	1	0	0	1.26517
P19338_K62	NCL	AAATSAK*K	NUCL_HUMAN Nucleolin OS=Homo sapiens OX=9606 GN=NCL PE=1 SV=3	1	0	0	2	0	0	0.78133
P26373_K69	RPL13	YHTK*VR	RL13_HUMAN 60S ribosomal protein L13 OS=Homo sapiens OX=9606 GN=RPL13 PE=1 SV=4	1	0	0	2	0	0	0.92277
P62829_K67	RPL23	K*GKPELR	RL23_HUMAN 60S ribosomal protein L23 OS=Homo sapiens OX=9606 GN=RPL23 PE=1 SV=1	1	0	0	0	0	0	0.67568
P78316_K416	NOP14	AGK*ATR	NOP14_HUMAN Nucleolar protein 14 OS=Homo sapiens OX=9606 GN=NOP14 PE=1 SV=3	1	0	0	0	0	0	0.96154
P33991_K746	MCM4	LAEAHAK*VR	MCM4_HUMAN DNA replication licensing factor MCM4 OS=Homo sapiens OX=9606 GN=MCM4 PE=1 SV=5	1	0	0	0	0	0	1.03093
P49368_K21	CCT3	K*VQSGNINAAK	TCPG_HUMAN T-complex protein 1 subunit gamma OS=Homo sapiens OX=9606 GN=CCT3 PE=1 SV=4	1	0	0	0	0	0	0.625
Q13813_K1274	SPTAN1	K*HEGFER	SPTN1_HUMAN Spectrin alpha chain, non-erythrocytic 1 OS=Homo sapiens OX=9606 GN=SPTAN1 PE=1 SV=3	1	0	1	0	0	0	0.87259
Q15084_K150	PDIA6	SGGYSSGK*QGR	PDIA6_HUMAN Protein disulfide-isomerase A6 OS=Homo sapiens OX=9606 GN=PDIA6 PE=1 SV=1	1	0	1	1	0	0	0.906163
P09429_K167	HMGB1	GK*PDAAK	HMGB1_HUMAN High mobility group protein B1 OS=Homo sapiens OX=9606 GN=HMGB1 PE=1 SV=3	1	0	0	0	0	0	1.11111
Q9Y490_K1522	TLN1	TTNPTAK*R	TLN1_HUMAN Talin-1 OS=Homo sapiens OX=9606 GN=TLN1 PE=1 SV=3	1	0	0	0	0	0	1.02041
P38159_K163	RBMX	SGGPPPK*R	RBMX_HUMAN RNA-binding motif protein, X chromosome OS=Homo sapiens OX=9606 GN=RBMX PE=1 SV=3	1	0	0	0	0	0	0.37879
O95376_K392	ARIH2	IHEK*IQER	ARI2_HUMAN E3 ubiquitin-protein ligase ARIH2 OS=Homo sapiens OX=9606 GN=ARIH2 PE=1 SV=1	1	0	0	0	0	0	1.02041
Q9BXP5_K200	SRRT	SK*YHPDEVGK	SRRT_HUMAN Serrate RNA effector molecule homolog OS=Homo sapiens OX=9606 GN=SRRT PE=1 SV=1	1	0	0	0	0	0	0.78125
P36578_K374	RPL4	AAVAGK*K	RL4_HUMAN 60S ribosomal protein L4 OS=Homo sapiens OX=9606 GN=RPL4 PE=1 SV=5	1	0	0	0	0	0	1.04167
P83731_K135	RPL24	APTK*AAPK	RL24_HUMAN 60S ribosomal protein L24 OS=Homo sapiens OX=9606 GN=RPL24 PE=1 SV=1	1	0	0	1	0	0	0.76216
P07355_K206	ANXA2	K*GTDVPK	ANXA2_HUMAN Annexin A2 OS=Homo sapiens OX=9606 GN=ANXA2 PE=1 SV=2	1	0	0	0	0	0	1
P19338_K80	NCL	K*AAVTPGK	NUCL_HUMAN Nucleolin OS=Homo sapiens OX=9606 GN=NCL PE=1 SV=3	1	0	0	0	0	0	0.9901
P19338_K96	NCL	K*TVTPAK	NUCL_HUMAN Nucleolin OS=Homo sapiens OX=9606 GN=NCL PE=1 SV=3	1	0	0	2	0	0	0.978223
P26373_K200	RPL13	AK*EAAEQDVEK	RL13_HUMAN 60S ribosomal protein L13 OS=Homo sapiens OX=9606 GN=RPL13 PE=1 SV=4	1	0	2	1	0	0	0.97169
P46783_K107	RPS10	PK*GLEGERPAR	RS10_HUMAN 40S ribosomal protein S10 OS=Homo sapiens OX=9606 GN=RPS10 PE=1 SV=1	1	0	0	0	0	0	1.0101
O75396_K43	SEC22B	K*LNEQSPTR	SC22B_HUMAN Vesicle-trafficking protein SEC22b OS=Homo sapiens OX=9606 GN=SEC22B PE=1 SV=4	1	0	1	2	0	0	0.822015
Q5QNW6_K21	H2BC18	AVTK*VQK	H2B2F_HUMAN Histone H2B type 2-F OS=Homo sapiens OX=9606 GN=H2BC18 PE=1 SV=3	1	0	0	2	0	0	0.997817
A8MWD9_K10	SNRPGP15	AHPPELK*K	RUXGL_HUMAN Putative small nuclear ribonucleoprotein G-like protein 15 OS=Homo sapiens OX=9606 GN=SNRPGP15 PE=5 SV=2	1	0	0	0	0	0	0.86957
P46781_K22	RPS9	RPFEK*SR	RS9_HUMAN 40S ribosomal protein S9 OS=Homo sapiens OX=9606 GN=RPS9 PE=1 SV=3	1	0	0	2	0	0	0.810627
P26599_K402	PTBP1	LHGK*PIR	PTBP1_HUMAN Polypyrimidine tract-binding protein 1 OS=Homo sapiens OX=9606 GN=PTBP1 PE=1 SV=1	1	0	0	0	0	0	1.11111
Q15233_K68	NONO	KPGEK*TFTQR	NONO_HUMAN Non-POU domain-containing octamer-binding protein OS=Homo sapiens OX=9606 GN=NONO PE=1 SV=4	1	0	0	0	0	0	0.83103
P06576_K159	ATP5F1B	GPIK*TK	ATPB_HUMAN ATP synthase subunit beta, mitochondrial OS=Homo sapiens OX=9606 GN=ATP5F1B PE=1 SV=3	1	0	0	1	0	0	0.953765
P23246_K559	SFPQ	MEELHNQEMQK*R	SFPQ_HUMAN Splicing factor, proline- and glutamine-rich OS=Homo sapiens OX=9606 GN=SFPQ PE=1 SV=2	1	0	0	2	1	0	0.9396
P18621_K27	RPL17	VHFK*NTR	RL17_HUMAN 60S ribosomal protein L17 OS=Homo sapiens OX=9606 GN=RPL17 PE=1 SV=3	1	0	2	2	0	1	0.947408
P14866_K34	HNRNPL	VK*MAAAGGGGGGGR	HNRPL_HUMAN Heterogeneous nuclear ribonucleoprotein L OS=Homo sapiens OX=9606 GN=HNRNPL PE=1 SV=2	1	0	0	0	0	0	0.98039
Q13185_K113	CBX3	DAADK*PR	CBX3_HUMAN Chromobox protein homolog 3 OS=Homo sapiens OX=9606 GN=CBX3 PE=1 SV=4	1	0	0	1	0	0	1.31669
O75607_K125	NPM3	LK*SGSGPVR	NPM3_HUMAN Nucleoplasmin-3 OS=Homo sapiens OX=9606 GN=NPM3 PE=1 SV=3	1	0	0	0	0	0	0.68966
Q99525_K9	H4C7	AGK*GLGK	H4G_HUMAN Histone H4-like protein type G OS=Homo sapiens OX=9606 GN=H4C7 PE=1 SV=1	1	0	0	0	0	0	1.72414
Q9ULC4_K51	MCTS1	KDPVK*IVR	MCTS1_HUMAN Malignant T-cell-amplified sequence 1 OS=Homo sapiens OX=9606 GN=MCTS1 PE=1 SV=1	1	0	0	0	0	0	0.88496
P61353_K52	RPL27	K*VTAAMGK	RL27_HUMAN 60S ribosomal protein L27 OS=Homo sapiens OX=9606 GN=RPL27 PE=1 SV=2	1	0	0	0	0	0	2.5641
P24534_K129	EEF1B2	LAQYESK*K	EF1B_HUMAN Elongation factor 1-beta OS=Homo sapiens OX=9606 GN=EEF1B2 PE=1 SV=3	1	0	0	2	0	0	1.04074
P10809_K364	HSPD1	GDK*AQIEK	CH60_HUMAN 60 kDa heat shock protein, mitochondrial OS=Homo sapiens OX=9606 GN=HSPD1 PE=1 SV=2	1	0	0	1	0	0	1.31665
P61254_K41	RPL26	QK*YNVR	RL26_HUMAN 60S ribosomal protein L26 OS=Homo sapiens OX=9606 GN=RPL26 PE=1 SV=1	1	0	0	0	0	0	0.8
P09874_K15	PARP1	VEYAK*SGR	PARP1_HUMAN Poly [ADP-ribose] polymerase 1 OS=Homo sapiens OX=9606 GN=PARP1 PE=1 SV=4	1	0	0	1	0	0	0.9812
P17987_K272	TCP1	ESDITK*ER	TCPA_HUMAN T-complex protein 1 subunit alpha OS=Homo sapiens OX=9606 GN=TCP1 PE=1 SV=1	1	0	0	1	0	0	0.63426
O75694_K1087	NUP155	YYEK*NR	NU155_HUMAN Nuclear pore complex protein Nup155 OS=Homo sapiens OX=9606 GN=NUP155 PE=1 SV=1	1	0	0	0	0	0	0.97087
P06744_K447	GPI	K*ELQAAGK	G6PI_HUMAN Glucose-6-phosphate isomerase OS=Homo sapiens OX=9606 GN=GPI PE=1 SV=4	1	0	0	0	0	0	0.76336
P46779_K22	RPL28	NK*QTYSTEPNNLK	RL28_HUMAN 60S ribosomal protein L28 OS=Homo sapiens OX=9606 GN=RPL28 PE=1 SV=3	1	0	1	0	0	0	0.85526
P41252_K382	IARS1	TLK*EQGR	SYIC_HUMAN Isoleucine--tRNA ligase, cytoplasmic OS=Homo sapiens OX=9606 GN=IARS1 PE=1 SV=2	1	0	0	0	0	0	1
P07910_K176	HNRNPC	SGFNSK*SGQR	HNRPC_HUMAN Heterogeneous nuclear ribonucleoproteins C1/C2 OS=Homo sapiens OX=9606 GN=HNRNPC PE=1 SV=4	1	0	0	2	0	0	0.935017
Q6Y7W6_K193	GIGYF2	K*HEFIR	GGYF2_HUMAN GRB10-interacting GYF protein 2 OS=Homo sapiens OX=9606 GN=GIGYF2 PE=1 SV=1	1	0	0	0	0	0	1.2987
P83881_K6	RPL36A	VNVPK*TR	RL36A_HUMAN 60S ribosomal protein L36a OS=Homo sapiens OX=9606 GN=RPL36A PE=1 SV=2	1	0	0	1	0	0	0.856955
P07910_K170	HNRNPC	GK*SGFNSK	HNRPC_HUMAN Heterogeneous nuclear ribonucleoproteins C1/C2 OS=Homo sapiens OX=9606 GN=HNRNPC PE=1 SV=4	1	0	0	1	0	0	0.80981
Q86Z23_K65	C1QL4	GK*AGLR	C1QL4_HUMAN Complement C1q-like protein 4 OS=Homo sapiens OX=9606 GN=C1QL4 PE=1 SV=1	1	0	0	0	0	0	0.95316
P54136_K60	RARS1	K*SLQAER	SYRC_HUMAN Arginine--tRNA ligase, cytoplasmic OS=Homo sapiens OX=9606 GN=RARS1 PE=1 SV=2	1	0	0	0	0	0	0.83333
P40227_K261	CCT6A	LVK*AER	TCPZ_HUMAN T-complex protein 1 subunit zeta OS=Homo sapiens OX=9606 GN=CCT6A PE=1 SV=3	1	0	0	0	0	0	1.21753
P50502_K5	ST13	K*VNELR	F10A1_HUMAN Hsc70-interacting protein OS=Homo sapiens OX=9606 GN=ST13 PE=1 SV=2	1	0	0	0	0	0	0.9434
Q9Y230_K67	RUVBL2	EGK*IAGR	RUVB2_HUMAN RuvB-like 2 OS=Homo sapiens OX=9606 GN=RUVBL2 PE=1 SV=3	1	0	0	0	0	0	1.23485
P25705_K167	ATP5F1A	GPIGSK*TR	ATPA_HUMAN ATP synthase subunit alpha, mitochondrial OS=Homo sapiens OX=9606 GN=ATP5F1A PE=1 SV=1	1	0	0	1	2	1	0.988548
P26641_K220	EEF1G	K*FAETQPK	EF1G_HUMAN Elongation factor 1-gamma OS=Homo sapiens OX=9606 GN=EEF1G PE=1 SV=3	1	0	1	1	0	0	0.737167
P12236_K147	SLC25A6	LAADVGK*SGTER	ADT3_HUMAN ADP/ATP translocase 3 OS=Homo sapiens OX=9606 GN=SLC25A6 PE=1 SV=4	1	0	2	2	0	1	0.974997
P06733_K81	ENO1	K*LNVTEQEK	ENOA_HUMAN Alpha-enolase OS=Homo sapiens OX=9606 GN=ENO1 PE=1 SV=2	1	0	0	0	0	0	0.81301
P09874_K654	PARP1	K*LTVNPGTK	PARP1_HUMAN Poly [ADP-ribose] polymerase 1 OS=Homo sapiens OX=9606 GN=PARP1 PE=1 SV=4	1	0	0	0	0	0	1.01634
Q9H7D7_K162	WDR26	LEHPSATK*FR	WDR26_HUMAN WD repeat-containing protein 26 OS=Homo sapiens OX=9606 GN=WDR26 PE=1 SV=3	1	0	0	0	0	0	0.86957
P04075_K140	ALDOA	K*DGADFAK	ALDOA_HUMAN Fructose-bisphosphate aldolase A OS=Homo sapiens OX=9606 GN=ALDOA PE=1 SV=2	1	0	0	0	0	0	1.36986
P19338_K132	NCL	GAAIPAK*GAK	NUCL_HUMAN Nucleolin OS=Homo sapiens OX=9606 GN=NCL PE=1 SV=3	1	0	0	1	0	0	1.02992
P04406_K84	GAPDH	DPSK*IK	G3P_HUMAN Glyceraldehyde-3-phosphate dehydrogenase OS=Homo sapiens OX=9606 GN=GAPDH PE=1 SV=3	1	0	0	0	0	0	1.85185
P07197_K314	NEFM	SAK*EEIAEYRR	NFM_HUMAN Neurofilament medium polypeptide OS=Homo sapiens OX=9606 GN=NEFM PE=1 SV=3	1	0	0	0	0	0	0.58824
Q15233_K11	NONO	TFNLEK*QNHTPR	NONO_HUMAN Non-POU domain-containing octamer-binding protein OS=Homo sapiens OX=9606 GN=NONO PE=1 SV=4	1	0	0	0	0	0	0.82645
P40222_K256	TXLNA	SLK*EEGVQR	TXLNA_HUMAN Alpha-taxilin OS=Homo sapiens OX=9606 GN=TXLNA PE=1 SV=3	1	0	0	0	0	0	0.81301
P11142_K108	HSPA8	VQVEYK*GETK	HSP7C_HUMAN Heat shock cognate 71 kDa protein OS=Homo sapiens OX=9606 GN=HSPA8 PE=1 SV=1	1	0	0	1	0	0	1.08902
P55072_K288	VCP	K*AFEEAEK	TERA_HUMAN Transitional endoplasmic reticulum ATPase OS=Homo sapiens OX=9606 GN=VCP PE=1 SV=4	1	0	0	0	0	0	0.87719
P61978_K60	HNRNPK	NAGAVIGK*GGK	HNRPK_HUMAN Heterogeneous nuclear ribonucleoprotein K OS=Homo sapiens OX=9606 GN=HNRNPK PE=1 SV=1	1	0	0	2	0	0	0.918567
Q99729_K142	HNRNPAB	VIDPK*K	ROAA_HUMAN Heterogeneous nuclear ribonucleoprotein A/B OS=Homo sapiens OX=9606 GN=HNRNPAB PE=1 SV=2	1	0	0	1	0	0	1.07367
Q12874_K420	SF3A3	GPK*AFQR	SF3A3_HUMAN Splicing factor 3A subunit 3 OS=Homo sapiens OX=9606 GN=SF3A3 PE=1 SV=1	1	0	0	2	0	0	0.977783
P31946_K11	YWHAB	SELVQK*AK	1433B_HUMAN 14-3-3 protein beta/alpha OS=Homo sapiens OX=9606 GN=YWHAB PE=1 SV=3	1	0	0	2	0	0	1.38137
P35268_K10	RPL22	LVVK*GGK	RL22_HUMAN 60S ribosomal protein L22 OS=Homo sapiens OX=9606 GN=RPL22 PE=1 SV=2	1	0	0	0	0	0	1.25
P78527_K3710	PRKDC	GK*PLPEYHVR	PRKDC_HUMAN DNA-dependent protein kinase catalytic subunit OS=Homo sapiens OX=9606 GN=PRKDC PE=1 SV=3	1	0	0	0	0	0	1.2987
Q92598_K703	HSPH1	IGTPVK*VR	HS105_HUMAN Heat shock protein 105 kDa OS=Homo sapiens OX=9606 GN=HSPH1 PE=1 SV=1	1	0	0	1	0	0	0.967655
P22392_K49	NME2	ASEEHLK*QHYIDLK	NDKB_HUMAN Nucleoside diphosphate kinase B OS=Homo sapiens OX=9606 GN=NME2 PE=1 SV=1	1	0	0	0	0	1	1.26683
P61604_K56	HSPE1	GK*GGEIQPVSVK	CH10_HUMAN 10 kDa heat shock protein, mitochondrial OS=Homo sapiens OX=9606 GN=HSPE1 PE=1 SV=2	1	0	2	2	0	0	0.83369
P30101_K347	PDIA3	DGK*ALER	PDIA3_HUMAN Protein disulfide-isomerase A3 OS=Homo sapiens OX=9606 GN=PDIA3 PE=1 SV=4	1	0	0	2	0	0	0.92089
P61981_K10	YWHAG	EQLVQK*AR	1433G_HUMAN 14-3-3 protein gamma OS=Homo sapiens OX=9606 GN=YWHAG PE=1 SV=2	1	0	0	1	0	0	1.01066
P10809_K75	HSPD1	VTK*DGVTVAK	CH60_HUMAN 60 kDa heat shock protein, mitochondrial OS=Homo sapiens OX=9606 GN=HSPD1 PE=1 SV=2	1	0	1	1	0	0	0.8208
P06748_K263	NPM1	GGSLPK*VEAK	NPM_HUMAN Nucleophosmin OS=Homo sapiens OX=9606 GN=NPM1 PE=1 SV=2	1	0	0	0	0	1	0.935315
Q9UNE7_K125	STUB1	AYSLAK*EQR	CHIP_HUMAN E3 ubiquitin-protein ligase CHIP OS=Homo sapiens OX=9606 GN=STUB1 PE=1 SV=2	1	0	0	0	0	0	0.81301
Q14980_K939	NUMA1	ELVK*EPAR	NUMA1_HUMAN Nuclear mitotic apparatus protein 1 OS=Homo sapiens OX=9606 GN=NUMA1 PE=1 SV=2	1	0	0	0	0	0	1.53846
P47813_K104	EIF1AX	SLK*AYGELPEHAK	IF1AX_HUMAN Eukaryotic translation initiation factor 1A, X-chromosomal OS=Homo sapiens OX=9606 GN=EIF1AX PE=1 SV=2	1	0	1	0	0	0	0.987565
P62195_K55	PSMC5	NELNAK*VR	PRS8_HUMAN 26S proteasome regulatory subunit 8 OS=Homo sapiens OX=9606 GN=PSMC5 PE=1 SV=1	1	0	0	2	0	0	0.924883
Q9BQG0_K874	MYBBP1A	QEQDLLHK*TAR	MBB1A_HUMAN Myb-binding protein 1A OS=Homo sapiens OX=9606 GN=MYBBP1A PE=1 SV=2	1	0	0	0	0	0	0.77519
P35580_K442	MYH10	INK*ALDR	MYH10_HUMAN Myosin-10 OS=Homo sapiens OX=9606 GN=MYH10 PE=1 SV=3	1	0	0	0	0	0	0.95238
O75534_K81	CSDE1	TGK*PIAVK	CSDE1_HUMAN Cold shock domain-containing protein E1 OS=Homo sapiens OX=9606 GN=CSDE1 PE=1 SV=2	1	0	0	0	0	0	0.86207
O75251_K136	NDUFS7	K*VYDQMPEPR	NDUS7_HUMAN NADH dehydrogenase [ubiquinone] iron-sulfur protein 7, mitochondrial OS=Homo sapiens OX=9606 GN=NDUFS7 PE=1 SV=3	1	0	0	0	0	0	1.85185
P52272_K134	HNRNPM	AAEVLNK*HSLSGR	HNRPM_HUMAN Heterogeneous nuclear ribonucleoprotein M OS=Homo sapiens OX=9606 GN=HNRNPM PE=1 SV=3	1	0	0	0	0	0	1.03093
P13667_K366	PDIA4	FQSK*YEPR	PDIA4_HUMAN Protein disulfide-isomerase A4 OS=Homo sapiens OX=9606 GN=PDIA4 PE=1 SV=2	1	0	0	0	0	0	1.14943
P62081_K155	RPS7	LIK*VHLDK	RS7_HUMAN 40S ribosomal protein S7 OS=Homo sapiens OX=9606 GN=RPS7 PE=1 SV=1	1	0	0	0	0	0	0.9434
P62837_K8	UBE2D2	IHK*ELNDLAR	UB2D2_HUMAN Ubiquitin-conjugating enzyme E2 D2 OS=Homo sapiens OX=9606 GN=UBE2D2 PE=1 SV=1	1	0	1	2	0	1	1.06762
P31948_K434	STIP1	K*AAALEAMK	STIP1_HUMAN Stress-induced-phosphoprotein 1 OS=Homo sapiens OX=9606 GN=STIP1 PE=1 SV=1	1	0	0	0	0	0	0.7874
P62241_K139	RPS8	LTPEEEEILNK*KR	RS8_HUMAN 40S ribosomal protein S8 OS=Homo sapiens OX=9606 GN=RPS8 PE=1 SV=2	1	0	0	0	0	0	1.14589
P41223_K125	BUD31	SK*LEVGR	BUD31_HUMAN Protein BUD31 homolog OS=Homo sapiens OX=9606 GN=BUD31 PE=1 SV=2	1	0	0	0	0	0	1.23457
P42025_K324	ACTR1B	LAPK*DIK	ACTY_HUMAN Beta-centractin OS=Homo sapiens OX=9606 GN=ACTR1B PE=1 SV=1	1	0	0	0	0	0	0.62893
P11586_K251	MTHFD1	K*VVGDVAYDEAK	C1TC_HUMAN C-1-tetrahydrofolate synthase, cytoplasmic OS=Homo sapiens OX=9606 GN=MTHFD1 PE=1 SV=3	1	0	0	0	0	0	1.72414
Q9BXW7_K177	HDHD5	LK*TTPLPR	HDHD5_HUMAN Haloacid dehalogenase-like hydrolase domain-containing 5 OS=Homo sapiens OX=9606 GN=HDHD5 PE=1 SV=1	1	0	0	0	0	0	1.04436
P39023_K30	RPL3	VK*SFPK	RL3_HUMAN 60S ribosomal protein L3 OS=Homo sapiens OX=9606 GN=RPL3 PE=1 SV=2	1	0	0	0	0	0	0.93458
Q92575_K269	UBXN4	IK*QQIALDR	UBXN4_HUMAN UBX domain-containing protein 4 OS=Homo sapiens OX=9606 GN=UBXN4 PE=1 SV=2	1	0	0	0	0	0	1.0101
Q00839_K12	HNRNPU	LK*VSELKEELK	HNRPU_HUMAN Heterogeneous nuclear ribonucleoprotein U OS=Homo sapiens OX=9606 GN=HNRNPU PE=1 SV=6	1	0	0	0	0	0	0.81301
Q00839_K343	HNRNPU	VTEK*IPVR	HNRPU_HUMAN Heterogeneous nuclear ribonucleoprotein U OS=Homo sapiens OX=9606 GN=HNRNPU PE=1 SV=6	1	0	0	1	0	0	1.14785
P19338_K116	NCL	GATPGK*ALVATPGK	NUCL_HUMAN Nucleolin OS=Homo sapiens OX=9606 GN=NCL PE=1 SV=3	1	0	1	0	0	0	0.767835
O95400_K321	CD2BP2	K*LDPPGGQFYNSK	CD2B2_HUMAN CD2 antigen cytoplasmic tail-binding protein 2 OS=Homo sapiens OX=9606 GN=CD2BP2 PE=1 SV=1	1	0	0	0	0	0	1.17647
P49321_K698	NASP	K*PTDGASSSNCVTDISHLVR	NASP_HUMAN Nuclear autoantigenic sperm protein OS=Homo sapiens OX=9606 GN=NASP PE=1 SV=2	1	0	0	0	0	0	1.28205
P62857_K10	RPS28	VQPIK*LAR	RS28_HUMAN 40S ribosomal protein S28 OS=Homo sapiens OX=9606 GN=RPS28 PE=1 SV=1	1	0	0	1	0	0	0.94156
Q13242_K46	SRSF9	EIELK*NR	SRSF9_HUMAN Serine/arginine-rich splicing factor 9 OS=Homo sapiens OX=9606 GN=SRSF9 PE=1 SV=1	1	0	0	0	0	0	0.87719
P06744_K454	GPI	ELQAAGK*SPEDLER	G6PI_HUMAN Glucose-6-phosphate isomerase OS=Homo sapiens OX=9606 GN=GPI PE=1 SV=4	1	0	2	0	0	0	1.04542
A6NDG6_K235	PGP	QADIIGK*PSR	PGP_HUMAN Glycerol-3-phosphate phosphatase OS=Homo sapiens OX=9606 GN=PGP PE=1 SV=1	1	0	0	0	0	0	1.6129
Q15293_K86	RCN1	LGK*IVDR	RCN1_HUMAN Reticulocalbin-1 OS=Homo sapiens OX=9606 GN=RCN1 PE=1 SV=1	1	0	0	0	0	0	0.9009
P35580_K1411	MYH10	LEEK*ALAYDKLEK	MYH10_HUMAN Myosin-10 OS=Homo sapiens OX=9606 GN=MYH10 PE=1 SV=3	1	0	0	0	0	0	1.11111
P36578_K364	RPL4	AAAAAAALQAK*SDEK	RL4_HUMAN 60S ribosomal protein L4 OS=Homo sapiens OX=9606 GN=RPL4 PE=1 SV=5	1	0	0	1	0	0	1.45416
P56385_K34	ATP5ME	YNYLK*PR	ATP5I_HUMAN ATP synthase subunit e, mitochondrial OS=Homo sapiens OX=9606 GN=ATP5ME PE=1 SV=2	1	0	0	0	0	0	1.06383
Q1KMD3_K7	HNRNPUL2	LK*VTELR	HNRL2_HUMAN Heterogeneous nuclear ribonucleoprotein U-like protein 2 OS=Homo sapiens OX=9606 GN=HNRNPUL2 PE=1 SV=1	1	0	0	0	0	0	0.83333
P26639_K243	TARS1	ILNEK*VNTPTTTVYR	SYTC_HUMAN Threonine--tRNA ligase 1, cytoplasmic OS=Homo sapiens OX=9606 GN=TARS1 PE=1 SV=3	1	0	1	0	0	0	0.822765
Q01105_K154	SET	VLSK*EFHLNESGDPSSK	SET_HUMAN Protein SET OS=Homo sapiens OX=9606 GN=SET PE=1 SV=3	1	0	0	0	0	0	0.68966
O75821_K172	EIF3G	CPYK*DTLGPMQK	EIF3G_HUMAN Eukaryotic translation initiation factor 3 subunit G OS=Homo sapiens OX=9606 GN=EIF3G PE=1 SV=2	1	0	0	0	0	0	1
P13010_K665	XRCC5	ALQEK*VEIK	XRCC5_HUMAN X-ray repair cross-complementing protein 5 OS=Homo sapiens OX=9606 GN=XRCC5 PE=1 SV=3	1	0	0	0	0	0	1.0989
Q99832_K55	CCT7	GK*ATISNDGATILK	TCPH_HUMAN T-complex protein 1 subunit eta OS=Homo sapiens OX=9606 GN=CCT7 PE=1 SV=2	1	0	1	0	0	0	0.88746
P50454_K39	SERPINH1	LSPK*AATLAER	SERPH_HUMAN Serpin H1 OS=Homo sapiens OX=9606 GN=SERPINH1 PE=1 SV=2	1	0	0	0	0	0	0.91718
O43264_K597	ZW10	AQK*GELLER	ZW10_HUMAN Centromere/kinetochore protein zw10 homolog OS=Homo sapiens OX=9606 GN=ZW10 PE=1 SV=3	1	0	0	0	0	0	1.02041
P46777_K197	RPL5	K*HIMGQNVADYMR	RL5_HUMAN 60S ribosomal protein L5 OS=Homo sapiens OX=9606 GN=RPL5 PE=1 SV=3	1	0	0	0	0	0	0.90909
Q9H3U1_K104	UNC45A	SQALEK*LGR	UN45A_HUMAN Protein unc-45 homolog A OS=Homo sapiens OX=9606 GN=UNC45A PE=1 SV=1	1	0	0	0	0	0	0.68966
P30041_K63	PRDX6	LAPEFAK*R	PRDX6_HUMAN Peroxiredoxin-6 OS=Homo sapiens OX=9606 GN=PRDX6 PE=1 SV=3	1	0	0	2	0	1	1.137
Q14566_K102	MCM6	K*EIPLAK	MCM6_HUMAN DNA replication licensing factor MCM6 OS=Homo sapiens OX=9606 GN=MCM6 PE=1 SV=1	1	0	0	0	0	0	1.23457
P55060_K17	CSE1L	K*TLDPDPAIR	XPO2_HUMAN Exportin-2 OS=Homo sapiens OX=9606 GN=CSE1L PE=1 SV=3	1	0	1	0	0	0	1.97917
Q8IUR0_K9	TRAPPC5	GK*SALLER	TPPC5_HUMAN Trafficking protein particle complex subunit 5 OS=Homo sapiens OX=9606 GN=TRAPPC5 PE=1 SV=1	1	0	0	1	0	0	1.21629
Q96CX2_K229	KCTD12	DAQADAK*FR	KCD12_HUMAN BTB/POZ domain-containing protein KCTD12 OS=Homo sapiens OX=9606 GN=KCTD12 PE=1 SV=1	1	0	0	0	0	0	0.83333
P52272_K716	HNRNPM	MMNGMK*LSGR	HNRPM_HUMAN Heterogeneous nuclear ribonucleoprotein M OS=Homo sapiens OX=9606 GN=HNRNPM PE=1 SV=3	1	0	0	0	0	0	1.06976
Q15084_K73	PDIA6	AATALK*DVVK	PDIA6_HUMAN Protein disulfide-isomerase A6 OS=Homo sapiens OX=9606 GN=PDIA6 PE=1 SV=1	1	0	0	0	0	0	1.2987
P20674_K113	COX5A	ILEVVK*DK	COX5A_HUMAN Cytochrome c oxidase subunit 5A, mitochondrial OS=Homo sapiens OX=9606 GN=COX5A PE=1 SV=2	1	0	0	2	0	0	0.92733
P55072_K60	VCP	GDTVLLK*GK	TERA_HUMAN Transitional endoplasmic reticulum ATPase OS=Homo sapiens OX=9606 GN=VCP PE=1 SV=4	1	0	0	0	0	0	1.43845
P36542_K29	ATP5F1C	ATLK*DITR	ATPG_HUMAN ATP synthase subunit gamma, mitochondrial OS=Homo sapiens OX=9606 GN=ATP5F1C PE=1 SV=1	1	0	0	0	0	0	1.0101
Q9UQE7_K238	SMC3	AK*LDELSAK	SMC3_HUMAN Structural maintenance of chromosomes protein 3 OS=Homo sapiens OX=9606 GN=SMC3 PE=1 SV=2	1	0	0	0	0	0	1.03093
P06748_K141	NPM1	LLSISGK*R	NPM_HUMAN Nucleophosmin OS=Homo sapiens OX=9606 GN=NPM1 PE=1 SV=2	1	0	0	2	0	0	0.78094
Q08170_K159	SRSF4	ALEK*LDGTEVNGR	SRSF4_HUMAN Serine/arginine-rich splicing factor 4 OS=Homo sapiens OX=9606 GN=SRSF4 PE=1 SV=2	1	0	0	0	0	0	0.59172
P07355_K204	ANXA2	DLYDAGVK*R	ANXA2_HUMAN Annexin A2 OS=Homo sapiens OX=9606 GN=ANXA2 PE=1 SV=2	1	0	0	1	0	0	0.890605
P14854_K13	COX6B1	NYK*TAPFDSR	CX6B1_HUMAN Cytochrome c oxidase subunit 6B1 OS=Homo sapiens OX=9606 GN=COX6B1 PE=1 SV=2	1	0	0	0	0	0	1.14943
O43505_K60	B4GAT1	SVDQVK*AQLR	B4GA1_HUMAN Beta-1,4-glucuronyltransferase 1 OS=Homo sapiens OX=9606 GN=B4GAT1 PE=1 SV=1	1	0	0	0	0	0	1.25078
Q99729_K83	HNRNPAB	K*DLKDYFTK	ROAA_HUMAN Heterogeneous nuclear ribonucleoprotein A/B OS=Homo sapiens OX=9606 GN=HNRNPAB PE=1 SV=2	1	0	0	0	0	0	0.87719
P82979_K31	SARNP	GIK*QDLIHR	SARNP_HUMAN SAP domain-containing ribonucleoprotein OS=Homo sapiens OX=9606 GN=SARNP PE=1 SV=3	1	0	0	0	0	0	1.21951
Q9NTZ6_K336	RBM12	VDAVHLLK*DHVGR	RBM12_HUMAN RNA-binding protein 12 OS=Homo sapiens OX=9606 GN=RBM12 PE=1 SV=1	1	0	0	0	0	0	1.36986
Q16850_K412	CYP51A1	LK*DSWVER	CP51A_HUMAN Lanosterol 14-alpha demethylase OS=Homo sapiens OX=9606 GN=CYP51A1 PE=1 SV=3	1	0	0	0	0	0	1.33333
P78371_K154	CCT2	EALLSSAVDHGSDEVK*FR	TCPB_HUMAN T-complex protein 1 subunit beta OS=Homo sapiens OX=9606 GN=CCT2 PE=1 SV=4	1	0	0	0	2	2	1.00378
P40227_K127	CCT6A	IITEGFEAAK*EK	TCPZ_HUMAN T-complex protein 1 subunit zeta OS=Homo sapiens OX=9606 GN=CCT6A PE=1 SV=3	1	0	0	1	0	1	0.765263
P55072_K565	VCP	EIFDK*AR	TERA_HUMAN Transitional endoplasmic reticulum ATPase OS=Homo sapiens OX=9606 GN=VCP PE=1 SV=4	1	0	0	1	0	0	1.36712
P08195_K615	SLC3A2	LK*LEPHEGLLLR	4F2_HUMAN 4F2 cell-surface antigen heavy chain OS=Homo sapiens OX=9606 GN=SLC3A2 PE=1 SV=3	1	0	0	0	0	0	0.98039
Q06830_K16	PRDX1	IGHPAPNFK*ATAVMPDGQFK	PRDX1_HUMAN Peroxiredoxin-1 OS=Homo sapiens OX=9606 GN=PRDX1 PE=1 SV=1	1	0	2	1	0	0	1.11989
Q12906_K413	ILF3	LNQLK*PGLQYK	ILF3_HUMAN Interleukin enhancer-binding factor 3 OS=Homo sapiens OX=9606 GN=ILF3 PE=1 SV=3	1	0	0	0	0	0	0.98039
P28070_K201	PSMB4	EVLEK*QPVLSQTEAR	PSB4_HUMAN Proteasome subunit beta type-4 OS=Homo sapiens OX=9606 GN=PSMB4 PE=1 SV=4	1	0	1	0	0	0	1.25946
Q12905_K59	ILF2	VKPAPDETSFSEALLK*R	ILF2_HUMAN Interleukin enhancer-binding factor 2 OS=Homo sapiens OX=9606 GN=ILF2 PE=1 SV=2	1	0	0	0	0	0	0.60241
P24539_K53	ATP5PB	PVPPLPEYGGK*VR	AT5F1_HUMAN ATP synthase F(0) complex subunit B1, mitochondrial OS=Homo sapiens OX=9606 GN=ATP5PB PE=1 SV=2	1	0	0	2	0	0	1.22613
P09874_K414	PARP1	AMIEK*LGGK	PARP1_HUMAN Poly [ADP-ribose] polymerase 1 OS=Homo sapiens OX=9606 GN=PARP1 PE=1 SV=4	1	0	0	1	1	0	0.942497
P60709_K113	ACTB	VAPEEHPVLLTEAPLNPK*ANR	ACTB_HUMAN Actin, cytoplasmic 1 OS=Homo sapiens OX=9606 GN=ACTB PE=1 SV=1	1	1	1	1	1	1	0.854393
P62249_K33	RPS16	GNGLIK*VNGRPLEMIEPR	RS16_HUMAN 40S ribosomal protein S16 OS=Homo sapiens OX=9606 GN=RPS16 PE=1 SV=2	1	0	0	0	0	0	1.20576
O14980_K54	XPO1	MAQEVLTHLK*EHPDAWTR	XPO1_HUMAN Exportin-1 OS=Homo sapiens OX=9606 GN=XPO1 PE=1 SV=1	1	0	0	0	0	0	1.26582
P07195_K7	LDHB	EK*LIAPVAEEEATVPNNK	LDHB_HUMAN L-lactate dehydrogenase B chain OS=Homo sapiens OX=9606 GN=LDHB PE=1 SV=2	1	0	2	0	0	0	1.00252
P07900_K84	HSP90AA1	ELHINLIPNK*QDR	HS90A_HUMAN Heat shock protein HSP 90-alpha OS=Homo sapiens OX=9606 GN=HSP90AA1 PE=1 SV=5	1	0	0	2	0	0	1.47553
P62913_K85	RPL11	AEEILEK*GLK	RL11_HUMAN 60S ribosomal protein L11 OS=Homo sapiens OX=9606 GN=RPL11 PE=1 SV=2	1	0	0	0	0	0	1.66667
P46776_K94	RPL27A	NK*TGAAPIIDVVR	RL27A_HUMAN 60S ribosomal protein L27a OS=Homo sapiens OX=9606 GN=RPL27A PE=1 SV=2	1	0	0	0	0	0	0.70548
P13797_K437	PLS3	IK*VPVDWSK	PLST_HUMAN Plastin-3 OS=Homo sapiens OX=9606 GN=PLS3 PE=1 SV=4	1	0	0	0	0	0	0.97087
O14908_K199	GIPC1	LLK*ELPR	GIPC1_HUMAN PDZ domain-containing protein GIPC1 OS=Homo sapiens OX=9606 GN=GIPC1 PE=1 SV=2	1	0	0	0	0	0	0.8
Q71DI3_K123	H3C15	VTIMPK*DIQLAR	H32_HUMAN Histone H3.2 OS=Homo sapiens OX=9606 GN=H3C15 PE=1 SV=3	1	1	1	1	1	1	0.937395
O75643_K1049	SNRNP200	VPIPVK*ESIEEPSAK	U520_HUMAN U5 small nuclear ribonucleoprotein 200 kDa helicase OS=Homo sapiens OX=9606 GN=SNRNP200 PE=1 SV=2	1	0	0	0	0	0	1.11111
P07900_K539	HSP90AA1	EFEGK*TLVSVTK	HS90A_HUMAN Heat shock protein HSP 90-alpha OS=Homo sapiens OX=9606 GN=HSP90AA1 PE=1 SV=5	1	0	1	0	0	0	1.16263
P08238_K531	HSP90AB1	EFDGK*SLVSVTK	HS90B_HUMAN Heat shock protein HSP 90-beta OS=Homo sapiens OX=9606 GN=HSP90AB1 PE=1 SV=4	1	0	1	0	0	0	0.974225
P22102_K111	GART	FAK*EFMDR	PUR2_HUMAN Trifunctional purine biosynthetic protein adenosine-3 OS=Homo sapiens OX=9606 GN=GART PE=1 SV=1	1	0	0	0	0	0	1.08696
Q8N1F7_K718	NUP93	LK*LVPLNQESVEER	NUP93_HUMAN Nuclear pore complex protein Nup93 OS=Homo sapiens OX=9606 GN=NUP93 PE=1 SV=2	1	0	0	0	0	0	1.0101
P41240_K393	CSK	IPLK*DVVPR	CSK_HUMAN Tyrosine-protein kinase CSK OS=Homo sapiens OX=9606 GN=CSK PE=1 SV=1	1	0	0	0	0	0	1.0101
P06576_K485	ATP5F1B	LVPLK*ETIK	ATPB_HUMAN ATP synthase subunit beta, mitochondrial OS=Homo sapiens OX=9606 GN=ATP5F1B PE=1 SV=3	1	0	0	0	0	0	0.96154
P61604_K70	HSPE1	VGDK*VLLPEYGGTK	CH10_HUMAN 10 kDa heat shock protein, mitochondrial OS=Homo sapiens OX=9606 GN=HSPE1 PE=1 SV=2	1	0	2	0	2	2	0.983249
P22234_K247	PAICS	K*NFEWVAER	PUR6_HUMAN Multifunctional protein ADE2 OS=Homo sapiens OX=9606 GN=PAICS PE=1 SV=3	1	0	1	0	0	0	1.0977
P11142_K56	HSPA8	LIGDAAK*NQVAMNPTNTVFDAK	HSP7C_HUMAN Heat shock cognate 71 kDa protein OS=Homo sapiens OX=9606 GN=HSPA8 PE=1 SV=1	1	0	2	2	2	1	1.01487
Q6PI48_K224	DARS2	TPGGAK*EFLVPSR	SYDM_HUMAN Aspartate--tRNA ligase, mitochondrial OS=Homo sapiens OX=9606 GN=DARS2 PE=1 SV=1	1	0	0	0	0	0	0.76955
P26885_K103	FKBP2	K*LVIPSELGYGER	FKBP2_HUMAN Peptidyl-prolyl cis-trans isomerase FKBP2 OS=Homo sapiens OX=9606 GN=FKBP2 PE=1 SV=2	1	0	0	0	0	0	1.17647
P60709_K291	ACTB	K*DLYANTVLSGGTTMYPGIADR	ACTB_HUMAN Actin, cytoplasmic 1 OS=Homo sapiens OX=9606 GN=ACTB PE=1 SV=1	1	0	1	0	0	0	1.02513
P11021_K81	HSPA5	LIGDAAK*NQLTSNPENTVFDAK	BIP_HUMAN Endoplasmic reticulum chaperone BiP OS=Homo sapiens OX=9606 GN=HSPA5 PE=1 SV=2	1	0	1	2	1	2	1.05275
Q15287_K188	RNPS1	IK*MIDMPVER	RNPS1_HUMAN RNA-binding protein with serine-rich domain 1 OS=Homo sapiens OX=9606 GN=RNPS1 PE=1 SV=1	1	0	0	0	0	0	0.9434
P50990_K318	CCT8	LNSK*WDLR	TCPQ_HUMAN T-complex protein 1 subunit theta OS=Homo sapiens OX=9606 GN=CCT8 PE=1 SV=4	1	0	0	0	0	0	1.06383
P41250_K99	GARS1	APQVDVDKAVAELK*AR	GARS_HUMAN Glycine--tRNA ligase OS=Homo sapiens OX=9606 GN=GARS1 PE=1 SV=3	1	0	0	1	0	0	1.12812
Q71DI3_K80	H3C15	EIAQDFK*TDLR	H32_HUMAN Histone H3.2 OS=Homo sapiens OX=9606 GN=H3C15 PE=1 SV=3	1	1	1	1	1	1	0.875552
P23284_K215	PPIB	IEVEKPFAIAK*E	PPIB_HUMAN Peptidyl-prolyl cis-trans isomerase B OS=Homo sapiens OX=9606 GN=PPIB PE=1 SV=2	1	0	0	0	0	0	1.14943
Q8TCS8_K456	PNPT1	ELGHGALAEK*ALYPVIPR	PNPT1_HUMAN Polyribonucleotide nucleotidyltransferase 1, mitochondrial OS=Homo sapiens OX=9606 GN=PNPT1 PE=1 SV=2	1	0	0	0	0	0	1.03093
P10809_K473	HSPD1	TLK*IPAMTIAK	CH60_HUMAN 60 kDa heat shock protein, mitochondrial OS=Homo sapiens OX=9606 GN=HSPD1 PE=1 SV=2	1	0	0	0	0	0	0.89286
Q00059_K118	TFAM	FK*EQLTPSQIMSLEK	TFAM_HUMAN Transcription factor A, mitochondrial OS=Homo sapiens OX=9606 GN=TFAM PE=1 SV=1	1	0	0	0	0	0	0.82645
P60174_K175	TPI1	VVLAYEPVWAIGTGK*TATPQQAQEVHEK	TPIS_HUMAN Triosephosphate isomerase OS=Homo sapiens OX=9606 GN=TPI1 PE=1 SV=4	1	0	0	2	0	0	1.06456
P33176_K801	KIF5B	K*LFVQDLATR	KINH_HUMAN Kinesin-1 heavy chain OS=Homo sapiens OX=9606 GN=KIF5B PE=1 SV=1	1	0	0	0	0	0	0.97087
Q06830_K93	PRDX1	K*QGGLGPMNIPLVSDPK	PRDX1_HUMAN Peroxiredoxin-1 OS=Homo sapiens OX=9606 GN=PRDX1 PE=1 SV=1	1	0	0	0	0	0	0.92593
P22087_K205	FBL	DLINLAK*K	FBRL_HUMAN rRNA 2'-O-methyltransferase fibrillarin OS=Homo sapiens OX=9606 GN=FBL PE=1 SV=2	1	0	0	1	0	0	1.02631
P05023_K444	ATP1A1	AVFQANQENLPILK*R	AT1A1_HUMAN Sodium/potassium-transporting ATPase subunit alpha-1 OS=Homo sapiens OX=9606 GN=ATP1A1 PE=1 SV=1	1	0	1	2	0	0	0.913798
P62906_K91	RPL10A	AVDIPHMDIEALK*K	RL10A_HUMAN 60S ribosomal protein L10a OS=Homo sapiens OX=9606 GN=RPL10A PE=1 SV=2	1	0	0	0	0	0	0.96154
P10809_K96	HSPD1	NIGAK*LVQDVANNTNEEAGDGTTTATVLAR	CH60_HUMAN 60 kDa heat shock protein, mitochondrial OS=Homo sapiens OX=9606 GN=HSPD1 PE=1 SV=2	1	0	0	0	1	1	1.27264
P04406_K334	GAPDH	VVDLMAHMASK*E	G3P_HUMAN Glyceraldehyde-3-phosphate dehydrogenase OS=Homo sapiens OX=9606 GN=GAPDH PE=1 SV=3	1	0	0	2	1	1	0.914674
P50502_K364	ST13	LSAK*FGGQA	F10A1_HUMAN Hsc70-interacting protein OS=Homo sapiens OX=9606 GN=ST13 PE=1 SV=2	1	0	0	0	0	0	0.86957
P37837_K115	TALDO1	LSFDK*DAMVAR	TALDO_HUMAN Transaldolase OS=Homo sapiens OX=9606 GN=TALDO1 PE=1 SV=2	1	0	0	0	0	0	0.80645
P84098_K92	RPL19	MPEK*VTWMR	RL19_HUMAN 60S ribosomal protein L19 OS=Homo sapiens OX=9606 GN=RPL19 PE=1 SV=1	1	0	0	0	0	0	1.10037
P61160_K388	ACTR2	VLEK*LGVTVR	ARP2_HUMAN Actin-related protein 2 OS=Homo sapiens OX=9606 GN=ACTR2 PE=1 SV=1	1	0	0	0	0	0	0.95238
P62269_K106	RPS18	YSQVLANGLDNK*LR	RS18_HUMAN 40S ribosomal protein S18 OS=Homo sapiens OX=9606 GN=RPS18 PE=1 SV=3	1	0	0	0	0	0	1.26582
P28288_K535	ABCD3	K*GISDLVLK	ABCD3_HUMAN ATP-binding cassette sub-family D member 3 OS=Homo sapiens OX=9606 GN=ABCD3 PE=1 SV=1	1	0	0	0	0	0	0.90909
P11142_K187	HSPA8	IINEPTAAAIAYGLDK*K	HSP7C_HUMAN Heat shock cognate 71 kDa protein OS=Homo sapiens OX=9606 GN=HSPA8 PE=1 SV=1	1	0	0	1	0	1	0.91871
Q92841_K468	DDX17	SGK*APILIATDVASR	DDX17_HUMAN Probable ATP-dependent RNA helicase DDX17 OS=Homo sapiens OX=9606 GN=DDX17 PE=1 SV=2	1	0	2	2	0	0	0.881686
Q07955_K30	SRSF1	TK*DIEDVFYK	SRSF1_HUMAN Serine/arginine-rich splicing factor 1 OS=Homo sapiens OX=9606 GN=SRSF1 PE=1 SV=2	1	0	0	0	0	0	0.77519
P10809_K250	HSPD1	K*ISSIQSIVPALEIANAHR	CH60_HUMAN 60 kDa heat shock protein, mitochondrial OS=Homo sapiens OX=9606 GN=HSPD1 PE=1 SV=2	1	0	0	0	0	0	0.9901
P33240_K189	CSTF2	IVDPEIALK*ILHR	CSTF2_HUMAN Cleavage stimulation factor subunit 2 OS=Homo sapiens OX=9606 GN=CSTF2 PE=1 SV=1	1	0	0	0	0	0	0.5848
P17844_K388	DDX5	DWVLNEFK*HGK	DDX5_HUMAN Probable ATP-dependent RNA helicase DDX5 OS=Homo sapiens OX=9606 GN=DDX5 PE=1 SV=1	1	0	0	0	0	0	0.78125
P49368_K248	CCT3	IVLLDSSLEYK*K	TCPG_HUMAN T-complex protein 1 subunit gamma OS=Homo sapiens OX=9606 GN=CCT3 PE=1 SV=4	1	0	0	0	0	0	0.72464
P20674_K72	COX5A	K*GINTLVTYDMVPEPK	COX5A_HUMAN Cytochrome c oxidase subunit 5A, mitochondrial OS=Homo sapiens OX=9606 GN=COX5A PE=1 SV=2	1	0	0	0	0	0	0.88496
P37802_K171	TAGLN2	#VALUE!	TAGL2_HUMAN Transgelin-2 OS=Homo sapiens OX=9606 GN=TAGLN2 PE=1 SV=3	1	0	0	0	0	0	0.93306
P11021_K213	HSPA5	IINEPTAAAIAYGLDK*R	BIP_HUMAN Endoplasmic reticulum chaperone BiP OS=Homo sapiens OX=9606 GN=HSPA5 PE=1 SV=2	1	0	0	2	0	1	1.00408
Q15758_K522	SLC1A5	SELPLDPLPVPTEEGNPLLK*HYR	AAAT_HUMAN Neutral amino acid transporter B(0) OS=Homo sapiens OX=9606 GN=SLC1A5 PE=1 SV=2	1	0	0	0	0	0	1.11111
Q13564_K187	NAE1	LDK*PFPELR	ULA1_HUMAN NEDD8-activating enzyme E1 regulatory subunit OS=Homo sapiens OX=9606 GN=NAE1 PE=1 SV=1	1	0	0	0	0	0	0.93458
Q99797_K126	MIPEP	VADLADFVK*IAHPEPAFR	MIPEP_HUMAN Mitochondrial intermediate peptidase OS=Homo sapiens OX=9606 GN=MIPEP PE=1 SV=2	1	0	0	0	0	0	1.47059
P43686_K238	PSMC4	VVGSEFVQK*YLGEGPR	PRS6B_HUMAN 26S proteasome regulatory subunit 6B OS=Homo sapiens OX=9606 GN=PSMC4 PE=1 SV=2	1	0	0	0	0	0	0.96295
P62316_K118	SNRPD2	NPLIAGK*	SMD2_HUMAN Small nuclear ribonucleoprotein Sm D2 OS=Homo sapiens OX=9606 GN=SNRPD2 PE=1 SV=1	1	0	0	2	0	0	1.00471
P62826_K60	RAN	GPIK*FNVWDTAGQEK	RAN_HUMAN GTP-binding nuclear protein Ran OS=Homo sapiens OX=9606 GN=RAN PE=1 SV=3	1	0	2	1	2	2	0.878799
Q14204_K1610	DYNC1H1	LADLLGK*IQK	DYHC1_HUMAN Cytoplasmic dynein 1 heavy chain 1 OS=Homo sapiens OX=9606 GN=DYNC1H1 PE=1 SV=5	1	0	0	0	0	0	0.70922
P26641_K285	EEF1G	DPFAHLPK*STFVLDEFKR	EF1G_HUMAN Elongation factor 1-gamma OS=Homo sapiens OX=9606 GN=EEF1G PE=1 SV=3	1	0	0	0	0	0	0.51282
P13693_K19	TPT1	DLISHDEMFSDIYK*IR	TCTP_HUMAN Translationally-controlled tumor protein OS=Homo sapiens OX=9606 GN=TPT1 PE=1 SV=1	1	0	0	0	1	0	0.741655
Q8N1F7_K59	NUP93	TSQETADVK*ASVLLGSR	NUP93_HUMAN Nuclear pore complex protein Nup93 OS=Homo sapiens OX=9606 GN=NUP93 PE=1 SV=2	1	0	0	0	0	0	0.75758
Q14103_K114	HNRNPD	DLK*DYFSK	HNRPD_HUMAN Heterogeneous nuclear ribonucleoprotein D0 OS=Homo sapiens OX=9606 GN=HNRNPD PE=1 SV=1	1	0	0	0	0	0	0.76336
P61254_K2	RPL26	MK*FNPFVTSDR	RL26_HUMAN 60S ribosomal protein L26 OS=Homo sapiens OX=9606 GN=RPL26 PE=1 SV=1	1	0	0	0	0	0	1.07527
P19338_K324	NCL	SAPELK*TGISDVFAK	NUCL_HUMAN Nucleolin OS=Homo sapiens OX=9606 GN=NCL PE=1 SV=3	1	0	0	0	0	0	0.6993
P83881_K100	RPL36A	K*GQVIQF	RL36A_HUMAN 60S ribosomal protein L36a OS=Homo sapiens OX=9606 GN=RPL36A PE=1 SV=2	1	0	0	0	0	0	0.70922
Q5BKZ1_K459	ZNF326	ESVLTATSILNNPIVK*AR	ZN326_HUMAN DBIRD complex subunit ZNF326 OS=Homo sapiens OX=9606 GN=ZNF326 PE=1 SV=2	1	0	0	0	0	0	1.44928
Q12931_K699	TRAP1	LNELLVK*ALER	TRAP1_HUMAN Heat shock protein 75 kDa, mitochondrial OS=Homo sapiens OX=9606 GN=TRAP1 PE=1 SV=3	1	0	0	2	0	0	1.08419
P20700_K241	LMNB1	QIEYEYK*LAQALHEMR	LMNB1_HUMAN Lamin-B1 OS=Homo sapiens OX=9606 GN=LMNB1 PE=1 SV=2	1	0	0	0	0	0	0.89688
P46781_K30	RPS9	LDQELK*LIGEYGLR	RS9_HUMAN 40S ribosomal protein S9 OS=Homo sapiens OX=9606 GN=RPS9 PE=1 SV=3	1	0	0	0	0	0	0.86207
O43175_K69	PHGDH	VTADVINAAEK*LQVVGR	SERA_HUMAN D-3-phosphoglycerate dehydrogenase OS=Homo sapiens OX=9606 GN=PHGDH PE=1 SV=4	1	0	0	0	0	0	1.32596
P39687_K20	ANP32A	TPSDVK*ELVLDNSR	AN32A_HUMAN Acidic leucine-rich nuclear phosphoprotein 32 family member A OS=Homo sapiens OX=9606 GN=ANP32A PE=1 SV=1	1	0	0	0	0	0	0.86207
Q14807_K591	KIF22	QK*ILDLLNEGSAR	KIF22_HUMAN Kinesin-like protein KIF22 OS=Homo sapiens OX=9606 GN=KIF22 PE=1 SV=5	1	0	0	0	0	0	1.49254
P09874_K607	PARP1	LEQMPSK*EDAIEHFMK	PARP1_HUMAN Poly [ADP-ribose] polymerase 1 OS=Homo sapiens OX=9606 GN=PARP1 PE=1 SV=4	1	0	0	0	0	0	0.9434
Q8N257_K6	H2BU1	PDPSK*SAPAPK	H2B3B_HUMAN Histone H2B type 3-B OS=Homo sapiens OX=9606 GN=H2BU1 PE=1 SV=3	0	1	1	0	0	2	1.0404
A6NKP2_K352	SDR42E2	QLAK*AR	D42E2_HUMAN Putative short-chain dehydrogenase/reductase family 42E member 2 OS=Homo sapiens OX=9606 GN=SDR42E2 PE=3 SV=3	0	1	0	0	0	0	1.5625
P62805_K92	H4C1	TVTAMDVVYALK*R	H4_HUMAN Histone H4 OS=Homo sapiens OX=9606 GN=H4C1 PE=1 SV=2	0	2	2	2	0	1	0.826049
P62917_K21	RPL8	AHVK*HR	RL8_HUMAN 60S ribosomal protein L8 OS=Homo sapiens OX=9606 GN=RPL8 PE=1 SV=2	0	1	1	1	2	0	0.923016
P62937_K28	PPIA	VSFELFADK*VPK	PPIA_HUMAN Peptidyl-prolyl cis-trans isomerase A OS=Homo sapiens OX=9606 GN=PPIA PE=1 SV=2	0	2	2	2	2	1	0.888321
P38646_K394	HSPA9	MPK*VQQTVQDLFGR	GRP75_HUMAN Stress-70 protein, mitochondrial OS=Homo sapiens OX=9606 GN=HSPA9 PE=1 SV=2	0	2	2	0	0	0	1.09692
Q4L180_K149	FILIP1L	VVEK*HK	FIL1L_HUMAN Filamin A-interacting protein 1-like OS=Homo sapiens OX=9606 GN=FILIP1L PE=1 SV=2	0	1	0	0	0	0	0.78125
O90368_K1427		AK*EVSR	POLN_ONNVS Polyprotein P1234 OS=O'nyong-nyong virus (strain SG650) OX=374989 PE=3 SV=1	0	1	0	0	0	0	0.92593
P00558_K279	PGK1	NGVK*ITLPVDFVTADKFDENAK	PGK1_HUMAN Phosphoglycerate kinase 1 OS=Homo sapiens OX=9606 GN=PGK1 PE=1 SV=3	0	1	0	0	0	1	0.991015
P10809_K218	HSPD1	TLNDELEIIEGMK*FDR	CH60_HUMAN 60 kDa heat shock protein, mitochondrial OS=Homo sapiens OX=9606 GN=HSPD1 PE=1 SV=2	0	1	0	2	0	0	0.987837
Q9UII2_K82	ATP5IF1	HHEEEIVHHK*K	ATIF1_HUMAN ATPase inhibitor, mitochondrial OS=Homo sapiens OX=9606 GN=ATP5IF1 PE=1 SV=1	0	0	2	0	0	0	0.859855
Q9NZI8_K566	IGF2BP1	QQHQK*GQSNQAQAR	IF2B1_HUMAN Insulin-like growth factor 2 mRNA-binding protein 1 OS=Homo sapiens OX=9606 GN=IGF2BP1 PE=1 SV=2	0	0	1	0	0	0	1.33333
P16949_K104	STMN1	LTHK*MEANKENR	STMN1_HUMAN Stathmin OS=Homo sapiens OX=9606 GN=STMN1 PE=1 SV=3	0	0	1	0	0	0	0.82645
P35579_K1775	MYH9	SHAQK*NENAR	MYH9_HUMAN Myosin-9 OS=Homo sapiens OX=9606 GN=MYH9 PE=1 SV=4	0	0	2	2	0	1	0.859708
P09874_K945	PARP1	GK*HSVK	PARP1_HUMAN Poly [ADP-ribose] polymerase 1 OS=Homo sapiens OX=9606 GN=PARP1 PE=1 SV=4	0	0	2	2	0	0	0.781053
P31942_K255	HNRNPH3	DK*NNMQHR	HNRH3_HUMAN Heterogeneous nuclear ribonucleoprotein H3 OS=Homo sapiens OX=9606 GN=HNRNPH3 PE=1 SV=2	0	0	2	0	0	0	0.7937
Q04760_K157	GLO1	KPDDGK*MK	LGUL_HUMAN Lactoylglutathione lyase OS=Homo sapiens OX=9606 GN=GLO1 PE=1 SV=4	0	0	1	0	0	0	0.97087
P06748_K206	NPM1	NAQK*SNQNGK	NPM_HUMAN Nucleophosmin OS=Homo sapiens OX=9606 GN=NPM1 PE=1 SV=2	0	0	2	2	0	0	0.87401
Q14739_K64	LBR	K*GGSTSSSPSR	LBR_HUMAN Delta(14)-sterol reductase LBR OS=Homo sapiens OX=9606 GN=LBR PE=1 SV=2	0	0	1	0	0	0	0.97087
P49368_K529	CCT3	K*GDDQSR	TCPG_HUMAN T-complex protein 1 subunit gamma OS=Homo sapiens OX=9606 GN=CCT3 PE=1 SV=4	0	0	1	0	0	0	1.40845
P11388_K798	TOP2A	LHGGK*DSASPR	TOP2A_HUMAN DNA topoisomerase 2-alpha OS=Homo sapiens OX=9606 GN=TOP2A PE=1 SV=3	0	0	1	1	0	0	1.08501
P46777_K242	RPL5	K*AHAAIR	RL5_HUMAN 60S ribosomal protein L5 OS=Homo sapiens OX=9606 GN=RPL5 PE=1 SV=3	0	0	1	2	0	1	0.971545
P07910_K232	HNRNPC	NDK*SEEEQSSSSVK	HNRPC_HUMAN Heterogeneous nuclear ribonucleoproteins C1/C2 OS=Homo sapiens OX=9606 GN=HNRNPC PE=1 SV=4	0	0	1	0	0	0	1.07527
P07910_K223	HNRNPC	EQSK*QAVEMK	HNRPC_HUMAN Heterogeneous nuclear ribonucleoproteins C1/C2 OS=Homo sapiens OX=9606 GN=HNRNPC PE=1 SV=4	0	0	2	0	0	0	0.532455
Q5VTE0_K385	EEF1A1P5	SGK*KLEDGPK	EF1A3_HUMAN Putative elongation factor 1-alpha-like 3 OS=Homo sapiens OX=9606 GN=EEF1A1P5 PE=5 SV=1	0	0	2	0	0	0	0.89293
P50914_K177	RPL14	APAQK*VPAQK	RL14_HUMAN 60S ribosomal protein L14 OS=Homo sapiens OX=9606 GN=RPL14 PE=1 SV=4	0	0	1	0	0	0	0.92593
P54819_K147	AK2	LIHPK*SGR	KAD2_HUMAN Adenylate kinase 2, mitochondrial OS=Homo sapiens OX=9606 GN=AK2 PE=1 SV=2	0	0	1	1	0	0	0.95562
P61313_K83	RPL15	GATYGK*PVHHGVNQLK	RL15_HUMAN 60S ribosomal protein L15 OS=Homo sapiens OX=9606 GN=RPL15 PE=1 SV=2	0	0	1	0	0	0	1.14943
P02545_K260	LMNA	AQHEDQVEQYK*K	LMNA_HUMAN Prelamin-A/C OS=Homo sapiens OX=9606 GN=LMNA PE=1 SV=1	0	0	1	0	0	0	1.11111
P16949_K80	STMN1	EHEK*EVLQK	STMN1_HUMAN Stathmin OS=Homo sapiens OX=9606 GN=STMN1 PE=1 SV=3	0	0	1	0	0	0	1.19048
P47914_K149	RPL29	AQAAAPASVPAQAPK*R	RL29_HUMAN 60S ribosomal protein L29 OS=Homo sapiens OX=9606 GN=RPL29 PE=1 SV=2	0	0	1	0	0	0	1.03093
P08670_K168	VIM	QVDQLTNDK*AR	VIME_HUMAN Vimentin OS=Homo sapiens OX=9606 GN=VIM PE=1 SV=4	0	0	1	0	0	2	0.87913
P51610_K1989	HCFC1	NEK*GYGPATQVR	HCFC1_HUMAN Host cell factor 1 OS=Homo sapiens OX=9606 GN=HCFC1 PE=1 SV=2	0	0	1	0	0	0	1.07527
P17844_K80	DDX5	SK*EITVR	DDX5_HUMAN Probable ATP-dependent RNA helicase DDX5 OS=Homo sapiens OX=9606 GN=DDX5 PE=1 SV=1	0	0	1	2	0	0	0.687903
P00338_K81	LDHA	IVSGK*DYNVTANSK	LDHA_HUMAN L-lactate dehydrogenase A chain OS=Homo sapiens OX=9606 GN=LDHA PE=1 SV=2	0	0	1	0	0	0	1.6129
P23284_K116	PPIB	GDGTGGK*SIYGER	PPIB_HUMAN Peptidyl-prolyl cis-trans isomerase B OS=Homo sapiens OX=9606 GN=PPIB PE=1 SV=2	0	0	2	0	2	0	0.808997
P38646_K76	HSPA9	QAK*VLENAEGAR	GRP75_HUMAN Stress-70 protein, mitochondrial OS=Homo sapiens OX=9606 GN=HSPA9 PE=1 SV=2	0	0	2	0	0	0	0.940755
Q15366_K309	PCBP2	QGAK*INEIR	PCBP2_HUMAN Poly(rC)-binding protein 2 OS=Homo sapiens OX=9606 GN=PCBP2 PE=1 SV=1	0	0	2	1	2	2	0.864053
P30101_K130	PDIA3	K*QAGPASVPLR	PDIA3_HUMAN Protein disulfide-isomerase A3 OS=Homo sapiens OX=9606 GN=PDIA3 PE=1 SV=4	0	0	1	0	0	0	1.07527
O75347_K52	TBCA	K*QAEILQESR	TBCA_HUMAN Tubulin-specific chaperone A OS=Homo sapiens OX=9606 GN=TBCA PE=1 SV=3	0	0	2	0	0	0	0.85754
Q92945_K359	KHSRP	IQFK*QDDGTGPEK	FUBP2_HUMAN Far upstream element-binding protein 2 OS=Homo sapiens OX=9606 GN=KHSRP PE=1 SV=4	0	0	1	0	0	0	1.21951
P14625_K547	HSP90B1	K*EAESSPFVER	ENPL_HUMAN Endoplasmin OS=Homo sapiens OX=9606 GN=HSP90B1 PE=1 SV=1	0	0	1	0	0	0	0.68027
P38646_K121	HSPA9	QAVTNPNNTFYATK*R	GRP75_HUMAN Stress-70 protein, mitochondrial OS=Homo sapiens OX=9606 GN=HSPA9 PE=1 SV=2	0	0	1	1	0	0	1.04569
P62258_K142	YWHAE	K*EAAENSLVAYK	1433E_HUMAN 14-3-3 protein epsilon OS=Homo sapiens OX=9606 GN=YWHAE PE=1 SV=1	0	0	2	0	0	2	0.938438
P27635_K145	RPL10	LQNK*EHVIEALR	RL10_HUMAN 60S ribosomal protein L10 OS=Homo sapiens OX=9606 GN=RPL10 PE=1 SV=4	0	0	1	0	0	0	1.5873
P30153_K188	PPP2R1A	AAASK*LGEFAK	2AAA_HUMAN Serine/threonine-protein phosphatase 2A 65 kDa regulatory subunit A alpha isoform OS=Homo sapiens OX=9606 GN=PPP2R1A PE=1 SV=4	0	0	1	1	0	1	0.922133
P55072_K754	VCP	K*YEMFAQTLQQSR	TERA_HUMAN Transitional endoplasmic reticulum ATPase OS=Homo sapiens OX=9606 GN=VCP PE=1 SV=4	0	0	2	0	0	0	0.848145
O00571_K81	DDX3X	GK*SSFFSDR	DDX3X_HUMAN ATP-dependent RNA helicase DDX3X OS=Homo sapiens OX=9606 GN=DDX3X PE=1 SV=3	0	0	2	0	0	0	0.84133
Q8NC51_K303	SERBP1	AK*VEFNIR	PAIRB_HUMAN Plasminogen activator inhibitor 1 RNA-binding protein OS=Homo sapiens OX=9606 GN=SERBP1 PE=1 SV=2	0	0	2	0	0	0	1.00163
P46781_K155	RPS9	LDSQK*HIDFSLR	RS9_HUMAN 40S ribosomal protein S9 OS=Homo sapiens OX=9606 GN=RPS9 PE=1 SV=3	0	0	1	0	1	0	0.92588
P09874_K196	PARP1	GFSLLATEDKEALK*K	PARP1_HUMAN Poly [ADP-ribose] polymerase 1 OS=Homo sapiens OX=9606 GN=PARP1 PE=1 SV=4	0	0	1	1	0	0	1.34408
Q00610_K1501	CLTC	LEK*HELIEFR	CLH1_HUMAN Clathrin heavy chain 1 OS=Homo sapiens OX=9606 GN=CLTC PE=1 SV=5	0	0	1	0	0	0	1.51515
P49368_K381	CCT3	GASK*EILSEVER	TCPG_HUMAN T-complex protein 1 subunit gamma OS=Homo sapiens OX=9606 GN=CCT3 PE=1 SV=4	0	0	1	1	1	0	1.26545
P60660_K98	MYL6	VFDK*EGNGTVMGAEIR	MYL6_HUMAN Myosin light polypeptide 6 OS=Homo sapiens OX=9606 GN=MYL6 PE=1 SV=2	0	0	1	0	0	0	0.89286
P0DP23_K95	CALM1	VFDK*DGNGYISAAELR	CALM1_HUMAN Calmodulin-1 OS=Homo sapiens OX=9606 GN=CALM1 PE=1 SV=1	0	0	2	0	0	0	0.784835
P06733_K202	ENO1	YGK*DATNVGDEGGFAPNILENK	ENOA_HUMAN Alpha-enolase OS=Homo sapiens OX=9606 GN=ENO1 PE=1 SV=2	0	0	1	0	0	0	0.88496
Q03252_K150	LMNB2	VK*DLESLFHR	LMNB2_HUMAN Lamin-B2 OS=Homo sapiens OX=9606 GN=LMNB2 PE=1 SV=4	0	0	1	1	0	0	0.980485
P10809_K160	HSPD1	QSK*PVTTPEEIAQVATISANGDK	CH60_HUMAN 60 kDa heat shock protein, mitochondrial OS=Homo sapiens OX=9606 GN=HSPD1 PE=1 SV=2	0	0	1	0	0	0	0.82645
P0DMV9_K159	HSPA1B	QATK*DAGVIAGLNVLR	HS71B_HUMAN Heat shock 70 kDa protein 1B OS=Homo sapiens OX=9606 GN=HSPA1B PE=1 SV=1	0	0	1	1	0	1	0.900897
P60763_K166	RAC3	GLK*TVFDEAIR	RAC3_HUMAN Ras-related C3 botulinum toxin substrate 3 OS=Homo sapiens OX=9606 GN=RAC3 PE=1 SV=1	0	0	2	2	0	0	1.14503
P11021_K326	HSPA5	AK*FEELNMDLFR	BIP_HUMAN Endoplasmic reticulum chaperone BiP OS=Homo sapiens OX=9606 GN=HSPA5 PE=1 SV=2	0	0	2	1	0	0	0.991533
P27824_K61	CANX	VTYK*APVPTGEVYFADSFDR	CALX_HUMAN Calnexin OS=Homo sapiens OX=9606 GN=CANX PE=1 SV=2	0	0	1	0	0	0	0.87719
P08670_K139	VIM	ILLAELEQLK*GQGK	VIME_HUMAN Vimentin OS=Homo sapiens OX=9606 GN=VIM PE=1 SV=4	0	0	1	2	2	0	1.00287
P17844_K470	DDX5	EANQAINPK*LLQLVEDR	DDX5_HUMAN Probable ATP-dependent RNA helicase DDX5 OS=Homo sapiens OX=9606 GN=DDX5 PE=1 SV=1	0	0	2	1	0	1	1.02809
P61604_K8	HSPE1	K*FLPLFDR	CH10_HUMAN 10 kDa heat shock protein, mitochondrial OS=Homo sapiens OX=9606 GN=HSPE1 PE=1 SV=2	0	0	2	2	0	0	0.918822
P14618_K115	PKM	TATESFASDPILYRPVAVALDTK*GPEIR	KPYM_HUMAN Pyruvate kinase PKM OS=Homo sapiens OX=9606 GN=PKM PE=1 SV=4	0	0	1	1	0	1	0.953147
Q9BQG0_K179	MYBBP1A	K*ALVDILSEVSK	MBB1A_HUMAN Myb-binding protein 1A OS=Homo sapiens OX=9606 GN=MYBBP1A PE=1 SV=2	0	0	1	0	0	0	0.88647
P20700_K79	LMNB1	ELTGLK*ALYETELADAR	LMNB1_HUMAN Lamin-B1 OS=Homo sapiens OX=9606 GN=LMNB1 PE=1 SV=2	0	0	1	0	0	0	1
P07737_K54	PFN1	TFVNITPAEVGVLVGK*DR	PROF1_HUMAN Profilin-1 OS=Homo sapiens OX=9606 GN=PFN1 PE=1 SV=2	0	0	1	0	0	0	1.03093
Q13838_K53	DDX39B	DFLLK*PELLR	DX39B_HUMAN Spliceosome RNA helicase DDX39B OS=Homo sapiens OX=9606 GN=DDX39B PE=1 SV=1	0	0	1	1	0	0	0.923315
P0DMV9_K550	HSPA1B	NALESYAFNMK*SAVEDEGLK	HS71B_HUMAN Heat shock 70 kDa protein 1B OS=Homo sapiens OX=9606 GN=HSPA1B PE=1 SV=1	0	0	1	1	0	0	1.11111
P62244_K119	RPS15A	K*HTGGK	RS15A_HUMAN 40S ribosomal protein S15a OS=Homo sapiens OX=9606 GN=RPS15A PE=1 SV=2	0	0	1	1	0	0	1.00709
P62753_K243	RPS6	ASTSK*SESSQK	RS6_HUMAN 40S ribosomal protein S6 OS=Homo sapiens OX=9606 GN=RPS6 PE=1 SV=1	0	0	1	2	0	0	1.10357
Q9UNH7_K239	SNX6	SHK*SAADDYNR	SNX6_HUMAN Sorting nexin-6 OS=Homo sapiens OX=9606 GN=SNX6 PE=1 SV=1	0	0	1	0	0	0	1.05263
Q9Y2W1_K688	THRAP3	K*HGLAHDEMK	TR150_HUMAN Thyroid hormone receptor-associated protein 3 OS=Homo sapiens OX=9606 GN=THRAP3 PE=1 SV=2	0	0	1	0	0	0	1.25
P19338_K288	NCL	QK*AAPEAK	NUCL_HUMAN Nucleolin OS=Homo sapiens OX=9606 GN=NCL PE=1 SV=3	0	0	1	1	0	0	1.01863
P10809_K417	HSPD1	VGGTSDVEVNEK*KDR	CH60_HUMAN 60 kDa heat shock protein, mitochondrial OS=Homo sapiens OX=9606 GN=HSPD1 PE=1 SV=2	0	0	1	0	0	0	0.9056
P12270_K117	TPR	TK*EELEAEKR	TPR_HUMAN Nucleoprotein TPR OS=Homo sapiens OX=9606 GN=TPR PE=1 SV=3	0	0	1	0	0	0	1.20482
P25705_K531	ATP5F1A	ADGK*ISEQSDAK	ATPA_HUMAN ATP synthase subunit alpha, mitochondrial OS=Homo sapiens OX=9606 GN=ATP5F1A PE=1 SV=1	0	0	1	0	0	0	0.98039
P62841_K52	RPS15	K*QHSLLK	RS15_HUMAN 40S ribosomal protein S15 OS=Homo sapiens OX=9606 GN=RPS15 PE=1 SV=2	0	0	1	1	0	0	0.92022
P55769_K86	SNU13	SK*QALGR	NH2L1_HUMAN NHP2-like protein 1 OS=Homo sapiens OX=9606 GN=SNU13 PE=1 SV=3	0	0	1	2	0	0	0.719583
P35579_K1219	MYH9	AK*QTLENER	MYH9_HUMAN Myosin-9 OS=Homo sapiens OX=9606 GN=MYH9 PE=1 SV=4	0	0	1	0	0	0	0.66667
P49736_K384	MCM2	IQESPGK*VAAGR	MCM2_HUMAN DNA replication licensing factor MCM2 OS=Homo sapiens OX=9606 GN=MCM2 PE=1 SV=4	0	0	1	0	0	0	1.1236
P42166_K356	TMPO	SHISDQSPLSSK*R	LAP2A_HUMAN Lamina-associated polypeptide 2, isoform alpha OS=Homo sapiens OX=9606 GN=TMPO PE=1 SV=2	0	0	1	2	0	0	0.998543
P26373_K105	RPL13	NK*STESLQANVQR	RL13_HUMAN 60S ribosomal protein L13 OS=Homo sapiens OX=9606 GN=RPL13 PE=1 SV=4	0	0	1	0	0	0	0.92593
Q00839_K670	HNRNPU	LLEQYK*EESKK	HNRPU_HUMAN Heterogeneous nuclear ribonucleoprotein U OS=Homo sapiens OX=9606 GN=HNRNPU PE=1 SV=6	0	0	1	0	0	0	0.90909
Q8TCT9_K61	HM13	GK*NASDMPETITSR	HM13_HUMAN Minor histocompatibility antigen H13 OS=Homo sapiens OX=9606 GN=HM13 PE=1 SV=1	0	0	1	0	0	0	0.63291
Q00839_K352	HNRNPU	HLYTK*DIDIHEVR	HNRPU_HUMAN Heterogeneous nuclear ribonucleoprotein U OS=Homo sapiens OX=9606 GN=HNRNPU PE=1 SV=6	0	0	1	0	2	0	1.01527
P07197_K102	NEFM	SNEK*EQLQGLNDR	NFM_HUMAN Neurofilament medium polypeptide OS=Homo sapiens OX=9606 GN=NEFM PE=1 SV=3	0	0	1	0	0	0	0.91743
P07737_K91	PFN1	TK*STGGAPTFNVTVTK	PROF1_HUMAN Profilin-1 OS=Homo sapiens OX=9606 GN=PFN1 PE=1 SV=2	0	0	1	0	0	0	0.9009
Q13247_K165	SRSF6	ALDK*LDGTEINGR	SRSF6_HUMAN Serine/arginine-rich splicing factor 6 OS=Homo sapiens OX=9606 GN=SRSF6 PE=1 SV=2	0	0	1	0	0	1	0.87016
Q15084_K245	PDIA6	IFQK*GESPVDYDGGR	PDIA6_HUMAN Protein disulfide-isomerase A6 OS=Homo sapiens OX=9606 GN=PDIA6 PE=1 SV=1	0	0	1	0	0	0	0.84481
Q15233_K371	NONO	QQEGFK*GTFPDAR	NONO_HUMAN Non-POU domain-containing octamer-binding protein OS=Homo sapiens OX=9606 GN=NONO PE=1 SV=4	0	0	1	0	0	0	1.17647
O43324_K57	EEF1E1	QANK*EYLLGSTAEEK	MCA3_HUMAN Eukaryotic translation elongation factor 1 epsilon-1 OS=Homo sapiens OX=9606 GN=EEF1E1 PE=1 SV=1	0	0	1	0	0	0	0.81967
P06733_K193	ENO1	IGAEVYHNLK*NVIK	ENOA_HUMAN Alpha-enolase OS=Homo sapiens OX=9606 GN=ENO1 PE=1 SV=2	0	0	1	0	1	0	0.9759
P38646_K206	HSPA9	QATK*DAGQISGLNVLR	GRP75_HUMAN Stress-70 protein, mitochondrial OS=Homo sapiens OX=9606 GN=HSPA9 PE=1 SV=2	0	0	1	0	0	0	0.95238
P53396_K836	ACLY	K*PASFMTSICDER	ACLY_HUMAN ATP-citrate synthase OS=Homo sapiens OX=9606 GN=ACLY PE=1 SV=3	0	0	1	0	0	0	0.84034
F5HGJ4_K119	UL25	SPK*VSR	PP85_HCMVM Phosphoprotein 85 OS=Human cytomegalovirus (strain Merlin) OX=295027 GN=UL25 PE=3 SV=1	0	0	1	0	0	0	0.98039
Q14103_K197	HNRNPD	IFVGGLSPDTPEEK*IR	HNRPD_HUMAN Heterogeneous nuclear ribonucleoprotein D0 OS=Homo sapiens OX=9606 GN=HNRNPD PE=1 SV=1	0	0	1	0	1	1	0.733987
P59998_K44	ARPC4	SSK*ELLLQPVTISR	ARPC4_HUMAN Actin-related protein 2/3 complex subunit 4 OS=Homo sapiens OX=9606 GN=ARPC4 PE=1 SV=3	0	0	1	0	0	0	0.70423
P12268_K124	IMPDH2	YEQGFITDPVVLSPK*DR	IMDH2_HUMAN Inosine-5'-monophosphate dehydrogenase 2 OS=Homo sapiens OX=9606 GN=IMPDH2 PE=1 SV=2	0	0	1	0	0	0	0.91751
O00755_K173	WNT7A	EIK*QNAR	WNT7A_HUMAN Protein Wnt-7a OS=Homo sapiens OX=9606 GN=WNT7A PE=1 SV=2	0	0	1	0	0	0	0.9434
P62937_K82	PPIA	SIYGEK*FEDENFILK	PPIA_HUMAN Peptidyl-prolyl cis-trans isomerase A OS=Homo sapiens OX=9606 GN=PPIA PE=1 SV=2	0	0	1	0	0	0	0.71429
Q07020_K119	RPL18	AGGK*ILTFDQLALDSPK	RL18_HUMAN 60S ribosomal protein L18 OS=Homo sapiens OX=9606 GN=RPL18 PE=1 SV=2	0	0	1	0	2	0	1.13786
P68133_K70	ACTA1	GILTLK*YPIEHGIITNWDDMEK	ACTS_HUMAN Actin, alpha skeletal muscle OS=Homo sapiens OX=9606 GN=ACTA1 PE=1 SV=1	0	0	1	0	1	0	0.85114
P42766_K25	RPL35	QLDDLK*VELSQLR	RL35_HUMAN 60S ribosomal protein L35 OS=Homo sapiens OX=9606 GN=RPL35 PE=1 SV=2	0	0	1	0	0	1	1.20647
P14618_K305	PKM	GDLGIEIPAEK*VFLAQK	KPYM_HUMAN Pyruvate kinase PKM OS=Homo sapiens OX=9606 GN=PKM PE=1 SV=4	0	0	1	0	0	0	0.98582
P60842_K193	EIF4A1	GFK*DQIYDIFQK	IF4A1_HUMAN Eukaryotic initiation factor 4A-I OS=Homo sapiens OX=9606 GN=EIF4A1 PE=1 SV=1	0	0	1	0	0	0	1.08696
P00387_K228	CYB5R3	NK*HSAR	NB5R3_HUMAN NADH-cytochrome b5 reductase 3 OS=Homo sapiens OX=9606 GN=CYB5R3 PE=1 SV=3	0	0	0	1	0	0	1.03093
Q00839_K688	HNRNPU	QNTGSK*K	HNRPU_HUMAN Heterogeneous nuclear ribonucleoprotein U OS=Homo sapiens OX=9606 GN=HNRNPU PE=1 SV=6	0	0	0	2	0	0	0.80993
O14776_K520	TCERG1	AAQK*AK	TCRG1_HUMAN Transcription elongation regulator 1 OS=Homo sapiens OX=9606 GN=TCERG1 PE=1 SV=2	0	0	0	1	0	0	0.67568
P19338_K9	NCL	AGK*NQGDPK	NUCL_HUMAN Nucleolin OS=Homo sapiens OX=9606 GN=NCL PE=1 SV=3	0	0	0	1	0	0	0.02244
Q15738_K38	NSDHL	VNQNQAK*R	NSDHL_HUMAN Sterol-4-alpha-carboxylate 3-dehydrogenase, decarboxylating OS=Homo sapiens OX=9606 GN=NSDHL PE=1 SV=2	0	0	0	1	0	0	0.81645
Q9NX63_K45	CHCHD3	ESSPSGSK*SQR	MIC19_HUMAN MICOS complex subunit MIC19 OS=Homo sapiens OX=9606 GN=CHCHD3 PE=1 SV=1	0	0	0	2	0	0	0.60087
P16403_K148	H1-2	AAGGATPK*K	H12_HUMAN Histone H1.2 OS=Homo sapiens OX=9606 GN=H1-2 PE=1 SV=2	0	0	0	1	0	0	0.63694
P06744_K440	GPI	GK*STEEAR	G6PI_HUMAN Glucose-6-phosphate isomerase OS=Homo sapiens OX=9606 GN=GPI PE=1 SV=4	0	0	0	2	0	0	1.04995
P10412_K148	H1-4	ATGAATPK*K	H14_HUMAN Histone H1.4 OS=Homo sapiens OX=9606 GN=H1-4 PE=1 SV=2	0	0	0	2	0	0	6.06617
P62244_K19	RPS15A	SINNAEK*R	RS15A_HUMAN 40S ribosomal protein S15a OS=Homo sapiens OX=9606 GN=RPS15A PE=1 SV=2	0	0	0	2	0	0	0.937235
Q92598_K786	HSPH1	AQEIK*TK	HS105_HUMAN Heat shock protein 105 kDa OS=Homo sapiens OX=9606 GN=HSPH1 PE=1 SV=1	0	0	0	2	0	0	0.693975
P23246_K704	SFPQ	EEYEGPNKK*PR	SFPQ_HUMAN Splicing factor, proline- and glutamine-rich OS=Homo sapiens OX=9606 GN=SFPQ PE=1 SV=2	0	0	0	1	0	0	1.2987
P19338_K109	NCL	AVTTPGK*K	NUCL_HUMAN Nucleolin OS=Homo sapiens OX=9606 GN=NCL PE=1 SV=3	0	0	0	2	0	0	1.11309
P0DMV9_K257	HSPA1B	DISQNK*R	HS71B_HUMAN Heat shock 70 kDa protein 1B OS=Homo sapiens OX=9606 GN=HSPA1B PE=1 SV=1	0	0	0	1	0	0	1.03093
Q9Y5B9_K504	SUPT16H	GEQQIQK*AR	SP16H_HUMAN FACT complex subunit SPT16 OS=Homo sapiens OX=9606 GN=SUPT16H PE=1 SV=1	0	0	0	1	0	0	1.21951
P36578_K390	RPL4	AAVGVK*K	RL4_HUMAN 60S ribosomal protein L4 OS=Homo sapiens OX=9606 GN=RPL4 PE=1 SV=5	0	0	0	1	0	0	0.9434
P15692_K149	VEGFA	GKGK*GQK	VEGFA_HUMAN Vascular endothelial growth factor A OS=Homo sapiens OX=9606 GN=VEGFA PE=1 SV=2	0	0	0	1	0	0	0.76923
P42167_K334	TMPO	AEVGEK*TEER	LAP2B_HUMAN Lamina-associated polypeptide 2, isoforms beta/gamma OS=Homo sapiens OX=9606 GN=TMPO PE=1 SV=2	0	0	0	1	0	0	0.81967
P62269_K150	RPS18	TVGVSK*K	RS18_HUMAN 40S ribosomal protein S18 OS=Homo sapiens OX=9606 GN=RPS18 PE=1 SV=3	0	0	0	1	0	0	0.76923
P27824_K516	CANX	K*TDAPQPDVK	CALX_HUMAN Calnexin OS=Homo sapiens OX=9606 GN=CANX PE=1 SV=2	0	0	0	1	0	0	1.21951
P49588_K74	AARS1	AANTQK*CIR	SYAC_HUMAN Alanine--tRNA ligase, cytoplasmic OS=Homo sapiens OX=9606 GN=AARS1 PE=1 SV=2	0	0	0	1	0	0	0.8547
P25788_K65	PSMA3	LYEEGSNK*R	PSA3_HUMAN Proteasome subunit alpha type-3 OS=Homo sapiens OX=9606 GN=PSMA3 PE=1 SV=2	0	0	0	1	0	0	1
P63279_K146	UBE2I	VEYEK*R	UBC9_HUMAN SUMO-conjugating enzyme UBC9 OS=Homo sapiens OX=9606 GN=UBE2I PE=1 SV=1	0	0	0	2	0	0	0.831395
P05455_K280	SSB	AK*EALGK	LA_HUMAN Lupus La protein OS=Homo sapiens OX=9606 GN=SSB PE=1 SV=2	0	0	0	1	0	0	1.20482
Q9UNF1_K494	MAGED2	AAAEAAAEAK*AR	MAGD2_HUMAN Melanoma-associated antigen D2 OS=Homo sapiens OX=9606 GN=MAGED2 PE=1 SV=2	0	0	0	1	0	0	0.81301
P19338_K79	NCL	VAVATPAK*K	NUCL_HUMAN Nucleolin OS=Homo sapiens OX=9606 GN=NCL PE=1 SV=3	0	0	0	2	0	0	0.9731
Q587J7_K539	TDRD12	NTK*LPR	TDR12_HUMAN Putative ATP-dependent RNA helicase TDRD12 OS=Homo sapiens OX=9606 GN=TDRD12 PE=2 SV=2	0	0	0	1	0	0	0.93458
P06744_K366	GPI	YITK*SGTR	G6PI_HUMAN Glucose-6-phosphate isomerase OS=Homo sapiens OX=9606 GN=GPI PE=1 SV=4	0	0	0	2	0	0	1.15796
P19338_K70	NCL	VVVSPTK*K	NUCL_HUMAN Nucleolin OS=Homo sapiens OX=9606 GN=NCL PE=1 SV=3	0	0	0	1	0	0	0.93458
Q7KZF4_K513	SND1	VADISGDTQK*AK	SND1_HUMAN Staphylococcal nuclease domain-containing protein 1 OS=Homo sapiens OX=9606 GN=SND1 PE=1 SV=1	0	0	0	2	0	1	1.03908
Q99848_K127	EBNA1BP2	LHQLK*VPTK	EBP2_HUMAN Probable rRNA-processing protein EBP2 OS=Homo sapiens OX=9606 GN=EBNA1BP2 PE=1 SV=2	0	0	0	2	0	0	1.26191
P62851_K114	RPS25	NTK*GGDAPAAGEDA	RS25_HUMAN 40S ribosomal protein S25 OS=Homo sapiens OX=9606 GN=RPS25 PE=1 SV=1	0	0	0	1	0	0	0.86207
P17844_K32	DDX5	AGPLSGK*K	DDX5_HUMAN Probable ATP-dependent RNA helicase DDX5 OS=Homo sapiens OX=9606 GN=DDX5 PE=1 SV=1	0	0	0	2	0	0	1.01413
P61927_K10	RPL37	GTSSFGK*R	RL37_HUMAN 60S ribosomal protein L37 OS=Homo sapiens OX=9606 GN=RPL37 PE=1 SV=2	0	0	0	2	0	0	1.07755
Q14684_K21	RRP1B	LASSEK*GIR	RRP1B_HUMAN Ribosomal RNA processing protein 1 homolog B OS=Homo sapiens OX=9606 GN=RRP1B PE=1 SV=3	0	0	0	1	0	0	0.98039
P46777_K48	RPL5	YNTPK*YR	RL5_HUMAN 60S ribosomal protein L5 OS=Homo sapiens OX=9606 GN=RPL5 PE=1 SV=3	0	0	0	1	0	0	0.64935
P15311_K357	EZR	LQDYEEK*TK	EZRI_HUMAN Ezrin OS=Homo sapiens OX=9606 GN=EZR PE=1 SV=4	0	0	0	1	0	0	0.95238
P31948_K301	STIP1	QIAK*AYAR	STIP1_HUMAN Stress-induced-phosphoprotein 1 OS=Homo sapiens OX=9606 GN=STIP1 PE=1 SV=1	0	0	0	1	0	0	0.62112
Q99613_K72	EIF3C	NAMK*IR	EIF3C_HUMAN Eukaryotic translation initiation factor 3 subunit C OS=Homo sapiens OX=9606 GN=EIF3C PE=1 SV=1	0	0	0	1	0	0	0.81301
Q00341_K1066	HDLBP	YHPK*IIGR	VIGLN_HUMAN Vigilin OS=Homo sapiens OX=9606 GN=HDLBP PE=1 SV=2	0	0	0	1	0	0	0.51282
P52565_K178	ARHGDIA	GSYSIK*SR	GDIR1_HUMAN Rho GDP-dissociation inhibitor 1 OS=Homo sapiens OX=9606 GN=ARHGDIA PE=1 SV=3	0	0	0	2	2	0	1.13916
P42704_K1332	LRPPRC	SYVSEK*DVTSAK	LPPRC_HUMAN Leucine-rich PPR motif-containing protein, mitochondrial OS=Homo sapiens OX=9606 GN=LRPPRC PE=1 SV=3	0	0	0	1	0	0	1.21951
Q14980_K891	NUMA1	ALQQVQEK*EVR	NUMA1_HUMAN Nuclear mitotic apparatus protein 1 OS=Homo sapiens OX=9606 GN=NUMA1 PE=1 SV=2	0	0	0	1	0	0	1.21951
P61254_K51	RPL26	K*DDEVQVVR	RL26_HUMAN 60S ribosomal protein L26 OS=Homo sapiens OX=9606 GN=RPL26 PE=1 SV=1	0	0	0	1	0	0	1.28205
P02545_K233	LMNA	LVEIDNGK*QR	LMNA_HUMAN Prelamin-A/C OS=Homo sapiens OX=9606 GN=LMNA PE=1 SV=1	0	0	0	2	0	0	1.04011
Q16891_K282	IMMT	TVEGALK*ER	MIC60_HUMAN MICOS complex subunit MIC60 OS=Homo sapiens OX=9606 GN=IMMT PE=1 SV=1	0	0	0	1	0	1	1.02778
P50213_K343	IDH3A	SLTK*DLGGNAK	IDH3A_HUMAN Isocitrate dehydrogenase [NAD] subunit alpha, mitochondrial OS=Homo sapiens OX=9606 GN=IDH3A PE=1 SV=1	0	0	0	1	0	0	1.07527
P55265_K1115	ADAR	VSIYDSK*R	DSRAD_HUMAN Double-stranded RNA-specific adenosine deaminase OS=Homo sapiens OX=9606 GN=ADAR PE=1 SV=4	0	0	0	1	0	0	0.76336
P27348_K9	YWHAQ	TELIQK*AK	1433T_HUMAN 14-3-3 protein theta OS=Homo sapiens OX=9606 GN=YWHAQ PE=1 SV=1	0	0	0	1	0	0	0.62112
P51570_K252	GALK1	ALGK*ESLR	GALK1_HUMAN Galactokinase OS=Homo sapiens OX=9606 GN=GALK1 PE=1 SV=1	0	0	0	1	0	0	1.06383
Q15233_K190	NONO	GRPSGK*GIVEFSGK	NONO_HUMAN Non-POU domain-containing octamer-binding protein OS=Homo sapiens OX=9606 GN=NONO PE=1 SV=4	0	0	0	1	0	0	1.15186
P63104_K68	YWHAZ	VVSSIEQK*TEGAEK	1433Z_HUMAN 14-3-3 protein zeta/delta OS=Homo sapiens OX=9606 GN=YWHAZ PE=1 SV=1	0	0	0	1	0	0	1.44928
P62280_K32	RPS11	VLLGETGKEK*	RS11_HUMAN 40S ribosomal protein S11 OS=Homo sapiens OX=9606 GN=RPS11 PE=1 SV=3	0	0	0	1	0	0	1.05263
Q07955_K179	SRSF1	LDNTK*FR	SRSF1_HUMAN Serine/arginine-rich splicing factor 1 OS=Homo sapiens OX=9606 GN=SRSF1 PE=1 SV=2	0	0	0	2	0	0	1.11228
P62280_K30	RPS11	VLLGETGK*EK	RS11_HUMAN 40S ribosomal protein S11 OS=Homo sapiens OX=9606 GN=RPS11 PE=1 SV=3	0	0	0	2	0	1	0.842427
P61981_K142	YWHAG	YLAEVATGEK*R	1433G_HUMAN 14-3-3 protein gamma OS=Homo sapiens OX=9606 GN=YWHAG PE=1 SV=2	0	0	0	2	0	0	1.20053
P17066_K514	HSPA6	LSK*EEVER	HSP76_HUMAN Heat shock 70 kDa protein 6 OS=Homo sapiens OX=9606 GN=HSPA6 PE=1 SV=2	0	0	0	2	0	0	0.62093
P23396_K75	RPS3	ELTAVVQK*R	RS3_HUMAN 40S ribosomal protein S3 OS=Homo sapiens OX=9606 GN=RPS3 PE=1 SV=2	0	0	0	1	0	0	1.03799
P18669_K113	PGAM1	HGEAQVK*IWR	PGAM1_HUMAN Phosphoglycerate mutase 1 OS=Homo sapiens OX=9606 GN=PGAM1 PE=1 SV=2	0	0	0	1	0	0	0.6993
P35579_K1724	MYH9	GALALEEK*R	MYH9_HUMAN Myosin-9 OS=Homo sapiens OX=9606 GN=MYH9 PE=1 SV=4	0	0	0	1	0	0	0.70423
Q8WUM4_K48	PDCD6IP	AAEELSK*LR	PDC6I_HUMAN Programmed cell death 6-interacting protein OS=Homo sapiens OX=9606 GN=PDCD6IP PE=1 SV=1	0	0	0	2	0	0	1.00399
P61247_K46	RPS3A	NIGK*TLVTR	RS3A_HUMAN 40S ribosomal protein S3a OS=Homo sapiens OX=9606 GN=RPS3A PE=1 SV=2	0	0	0	2	0	0	0.904995
P16949_K43	STMN1	KK*DLSLEEIQK	STMN1_HUMAN Stathmin OS=Homo sapiens OX=9606 GN=STMN1 PE=1 SV=3	0	0	0	1	0	0	1.31579
P62280_K58	RPS11	EAIEGTYIDK*K	RS11_HUMAN 40S ribosomal protein S11 OS=Homo sapiens OX=9606 GN=RPS11 PE=1 SV=3	0	0	0	1	0	0	0.89286
Q99623_K250	PHB2	NPGYIK*LR	PHB2_HUMAN Prohibitin-2 OS=Homo sapiens OX=9606 GN=PHB2 PE=1 SV=2	0	0	0	1	0	0	1.33333
Q53HL2_K158	CDCA8	TQSIQGK*GK	BOREA_HUMAN Borealin OS=Homo sapiens OX=9606 GN=CDCA8 PE=1 SV=2	0	0	0	1	0	0	5.26316
P11021_K382	HSPA5	EFFNGK*EPSR	BIP_HUMAN Endoplasmic reticulum chaperone BiP OS=Homo sapiens OX=9606 GN=HSPA5 PE=1 SV=2	0	0	0	1	0	0	1.20482
P08238_K69	HSP90AB1	YESLTDPSKLDSGK*ELK	HS90B_HUMAN Heat shock protein HSP 90-beta OS=Homo sapiens OX=9606 GN=HSP90AB1 PE=1 SV=4	0	0	0	2	0	0	1.03988
Q9BVS4_K8	RIOK2	VNVAK*LR	RIOK2_HUMAN Serine/threonine-protein kinase RIO2 OS=Homo sapiens OX=9606 GN=RIOK2 PE=1 SV=2	0	0	0	2	0	0	0.79657
Q9NZ01_K291	TECR	SYLK*EFR	TECR_HUMAN Very-long-chain enoyl-CoA reductase OS=Homo sapiens OX=9606 GN=TECR PE=1 SV=1	0	0	0	2	0	0	0.79671
P20700_K156	LMNB1	DAALATALGDK*K	LMNB1_HUMAN Lamin-B1 OS=Homo sapiens OX=9606 GN=LMNB1 PE=1 SV=2	0	0	0	1	0	0	0.4717
P04406_K194	GAPDH	TVDGPSGK*LWR	G3P_HUMAN Glyceraldehyde-3-phosphate dehydrogenase OS=Homo sapiens OX=9606 GN=GAPDH PE=1 SV=3	0	0	0	1	0	2	1.05224
P0DMV9_K246	HSPA1B	LVNHFVEEFK*R	HS71B_HUMAN Heat shock 70 kDa protein 1B OS=Homo sapiens OX=9606 GN=HSPA1B PE=1 SV=1	0	0	0	2	0	0	0.880165
P43243_K588	MATR3	GIDLLK*K	MATR3_HUMAN Matrin-3 OS=Homo sapiens OX=9606 GN=MATR3 PE=1 SV=2	0	0	0	2	0	0	1.00428
Q9UMN6_K541	KMT2B	VIK*TPR	KMT2B_HUMAN Histone-lysine N-methyltransferase 2B OS=Homo sapiens OX=9606 GN=KMT2B PE=1 SV=1	0	0	0	1	0	0	1.08696
Q00610_K637	CLTC	ALEHFTDLYDIK*R	CLH1_HUMAN Clathrin heavy chain 1 OS=Homo sapiens OX=9606 GN=CLTC PE=1 SV=5	0	0	0	2	0	0	0.92555
P06733_K326	ENO1	FTASAGIQVVGDDLTVTNPK*R	ENOA_HUMAN Alpha-enolase OS=Homo sapiens OX=9606 GN=ENO1 PE=1 SV=2	0	0	0	2	0	0	1.08899
Q99729_K86	HNRNPAB	DLK*DYFTK	ROAA_HUMAN Heterogeneous nuclear ribonucleoprotein A/B OS=Homo sapiens OX=9606 GN=HNRNPAB PE=1 SV=2	0	0	0	1	0	0	1.03093
P63104_K157	YWHAZ	GIVDQSQQAYQEAFEISK*K	1433Z_HUMAN 14-3-3 protein zeta/delta OS=Homo sapiens OX=9606 GN=YWHAZ PE=1 SV=1	0	0	0	2	0	0	0.94017
Q02790_K76	FKBP4	DK*FSFDLGK	FKBP4_HUMAN Peptidyl-prolyl cis-trans isomerase FKBP4 OS=Homo sapiens OX=9606 GN=FKBP4 PE=1 SV=3	0	0	0	2	0	0	1.23577
P49368_K138	CCT3	ALDDMISTLK*K	TCPG_HUMAN T-complex protein 1 subunit gamma OS=Homo sapiens OX=9606 GN=CCT3 PE=1 SV=4	0	0	0	2	0	0	0.557315
P78527_K3355	PRKDC	IIANALSSEPACLAEIEEDK*AR	PRKDC_HUMAN DNA-dependent protein kinase catalytic subunit OS=Homo sapiens OX=9606 GN=PRKDC PE=1 SV=3	0	0	0	1	0	0	0.96154
Q5VTE0_K273	EEF1A1P5	VETGVLK*PGMVVTFAPVNVTTEVK	EF1A3_HUMAN Putative elongation factor 1-alpha-like 3 OS=Homo sapiens OX=9606 GN=EEF1A1P5 PE=5 SV=1	0	0	0	2	0	1	0.85476
P61604_K86	HSPE1	#VALUE!	CH10_HUMAN 10 kDa heat shock protein, mitochondrial OS=Homo sapiens OX=9606 GN=HSPE1 PE=1 SV=2	0	0	0	1	0	0	1.33333
P40926_K185	MDH2	ANTFVAELK*GLDPAR	MDHM_HUMAN Malate dehydrogenase, mitochondrial OS=Homo sapiens OX=9606 GN=MDH2 PE=1 SV=3	0	0	0	1	0	0	0.8
P78371_K402	CCT2	SLHDALCVLAQTVK*DSR	TCPB_HUMAN T-complex protein 1 subunit beta OS=Homo sapiens OX=9606 GN=CCT2 PE=1 SV=4	0	0	0	1	0	0	1.1236
Q8IY81_K678	FTSJ3	ILDPEGLALGAVIASSK*K	SPB1_HUMAN pre-rRNA 2'-O-ribose RNA methyltransferase FTSJ3 OS=Homo sapiens OX=9606 GN=FTSJ3 PE=1 SV=2	0	0	0	1	0	0	0.7937
P62081_K142	RPS7	TLTAVHDAILEDLVFPSEIVGK*R	RS7_HUMAN 40S ribosomal protein S7 OS=Homo sapiens OX=9606 GN=RPS7 PE=1 SV=1	0	0	0	2	0	0	0.89091
P13804_K139	ETFA	LEVAPISDIIAIK*SPDTFVR	ETFA_HUMAN Electron transfer flavoprotein subunit alpha, mitochondrial OS=Homo sapiens OX=9606 GN=ETFA PE=1 SV=1	0	0	0	1	0	0	1.20482
P09234_K22	SNRPC	K*THCSGR	RU1C_HUMAN U1 small nuclear ribonucleoprotein C OS=Homo sapiens OX=9606 GN=SNRPC PE=1 SV=1	0	0	0	1	0	0	0.89286
P37802_K154	TAGLN2	K*SKENPR	TAGL2_HUMAN Transgelin-2 OS=Homo sapiens OX=9606 GN=TAGLN2 PE=1 SV=3	0	0	0	1	0	0	1.48848
P46776_K92	RPL27A	VNAAK*NK	RL27A_HUMAN 60S ribosomal protein L27a OS=Homo sapiens OX=9606 GN=RPL27A PE=1 SV=2	0	0	0	1	0	0	0.89286
P19338_K110	NCL	K*GATPGK	NUCL_HUMAN Nucleolin OS=Homo sapiens OX=9606 GN=NCL PE=1 SV=3	0	0	0	1	0	0	0.82645
Q9BR39_K647	JPH2	GLTK*AGAK	JPH2_HUMAN Junctophilin-2 OS=Homo sapiens OX=9606 GN=JPH2 PE=1 SV=2	0	0	0	1	0	0	1.35135
P09651_K52	HNRNPA1	DPNTK*R	ROA1_HUMAN Heterogeneous nuclear ribonucleoprotein A1 OS=Homo sapiens OX=9606 GN=HNRNPA1 PE=1 SV=5	0	0	0	1	0	0	0.54348
P10412_K140	H1-4	K*ATGAATPK	H14_HUMAN Histone H1.4 OS=Homo sapiens OX=9606 GN=H1-4 PE=1 SV=2	0	0	0	1	0	0	1.05263
Q9H0C8_K356	ILKAP	EGK*SAADAR	ILKAP_HUMAN Integrin-linked kinase-associated serine/threonine phosphatase 2C OS=Homo sapiens OX=9606 GN=ILKAP PE=1 SV=1	0	0	0	1	0	0	1.35135
Q00839_K489	HNRNPU	GPK*GPEEK	HNRPU_HUMAN Heterogeneous nuclear ribonucleoprotein U OS=Homo sapiens OX=9606 GN=HNRNPU PE=1 SV=6	0	0	0	1	0	0	1.04167
P26583_K147	HMGB2	DKQPYEQK*AAK	HMGB2_HUMAN High mobility group protein B2 OS=Homo sapiens OX=9606 GN=HMGB2 PE=1 SV=2	0	0	0	1	0	0	0.74627
P47914_K156	RPL29	RTQAPTK*ASE	RL29_HUMAN 60S ribosomal protein L29 OS=Homo sapiens OX=9606 GN=RPL29 PE=1 SV=2	0	0	0	1	0	0	1.49254
P56385_K48	ATP5ME	IAAEEK*K	ATP5I_HUMAN ATP synthase subunit e, mitochondrial OS=Homo sapiens OX=9606 GN=ATP5ME PE=1 SV=2	0	0	0	1	0	0	0.59172
Q01105_K72	SET	VEQK*YNK	SET_HUMAN Protein SET OS=Homo sapiens OX=9606 GN=SET PE=1 SV=3	0	0	0	1	0	0	0.99042
P84090_K104	ERH	QAQQAGK*	ERH_HUMAN Enhancer of rudimentary homolog OS=Homo sapiens OX=9606 GN=ERH PE=1 SV=1	0	0	0	1	0	0	0.70423
P53396_K468	ACLY	ADEVAPAK*K	ACLY_HUMAN ATP-citrate synthase OS=Homo sapiens OX=9606 GN=ACLY PE=1 SV=3	0	0	0	1	0	0	1.16279
Q12796_K260	PNRC1	PFKNTENIK*	PNRC1_HUMAN Proline-rich nuclear receptor coactivator 1 OS=Homo sapiens OX=9606 GN=PNRC1 PE=1 SV=1	0	0	0	1	0	0	0.81967
P13639_K407	EEF2	MVPTSDK*GR	EF2_HUMAN Elongation factor 2 OS=Homo sapiens OX=9606 GN=EEF2 PE=1 SV=4	0	0	0	1	0	0	1
O14979_K302	HNRNPDL	YHQIGSGK*CEIK	HNRDL_HUMAN Heterogeneous nuclear ribonucleoprotein D-like OS=Homo sapiens OX=9606 GN=HNRNPDL PE=1 SV=3	0	0	0	1	0	0	1.25
P09622_K430	DLD	AK*TNADTDGMVK	DLDH_HUMAN Dihydrolipoyl dehydrogenase, mitochondrial OS=Homo sapiens OX=9606 GN=DLD PE=1 SV=2	0	0	0	1	0	0	1.05263
P08327_K262	NA	LK*EESLK	NRAM_I74A1 Neuraminidase OS=Influenza A virus (strain A/Equine/Cor/16/1974 H7N7) OX=11397 GN=NA PE=3 SV=1	0	0	0	1	0	0	0.86957
P25705_K539	ATP5F1A	ISEQSDAK*LK	ATPA_HUMAN ATP synthase subunit alpha, mitochondrial OS=Homo sapiens OX=9606 GN=ATP5F1A PE=1 SV=1	0	0	0	1	0	2	0.85782
Q8WWZ7_K860	ABCA5	ESK*SVR	ABCA5_HUMAN ATP-binding cassette sub-family A member 5 OS=Homo sapiens OX=9606 GN=ABCA5 PE=2 SV=2	0	0	0	1	0	0	0.53191
Q9HB71_K33	CACYBP	DALTAEK*SK	CYBP_HUMAN Calcyclin-binding protein OS=Homo sapiens OX=9606 GN=CACYBP PE=1 SV=2	0	0	0	1	0	0	1.49254
Q8N201_K100	INTS1	LAEAAVAEK*R	INT1_HUMAN Integrator complex subunit 1 OS=Homo sapiens OX=9606 GN=INTS1 PE=1 SV=2	0	0	0	1	0	0	1.16279
P62701_K120	RPS4X	ITPEEAK*YK	RS4X_HUMAN 40S ribosomal protein S4, X isoform OS=Homo sapiens OX=9606 GN=RPS4X PE=1 SV=2	0	0	0	1	0	0	1.31579
P02545_K341	LMNA	LLAEK*ER	LMNA_HUMAN Prelamin-A/C OS=Homo sapiens OX=9606 GN=LMNA PE=1 SV=1	0	0	0	1	0	0	1.07527
P52790_K510	HK3	AMAK*GLR	HXK3_HUMAN Hexokinase-3 OS=Homo sapiens OX=9606 GN=HK3 PE=1 SV=2	0	0	0	1	0	0	1.40845
P55072_K236	VCP	AIGVK*PPR	TERA_HUMAN Transitional endoplasmic reticulum ATPase OS=Homo sapiens OX=9606 GN=VCP PE=1 SV=4	0	0	0	1	0	0	1.08696
Q99623_K296	PHB2	GSDSLIK*GK	PHB2_HUMAN Prohibitin-2 OS=Homo sapiens OX=9606 GN=PHB2 PE=1 SV=2	0	0	0	1	0	0	1.63934
O94906_K768	PRPF6	AILEK*SR	PRP6_HUMAN Pre-mRNA-processing factor 6 OS=Homo sapiens OX=9606 GN=PRPF6 PE=1 SV=1	0	0	0	1	0	0	1.01175
O15355_K406	PPM1G	AIGDHFYK*R	PPM1G_HUMAN Protein phosphatase 1G OS=Homo sapiens OX=9606 GN=PPM1G PE=1 SV=1	0	0	0	1	1	0	1.1608
Q8NC51_K122	SERBP1	RPDQQLQGEGK*IIDR	PAIRB_HUMAN Plasminogen activator inhibitor 1 RNA-binding protein OS=Homo sapiens OX=9606 GN=SERBP1 PE=1 SV=2	0	0	0	1	0	0	0.60976
P26373_K174	RPL13	VITEEEK*NFK	RL13_HUMAN 60S ribosomal protein L13 OS=Homo sapiens OX=9606 GN=RPL13 PE=1 SV=4	0	0	0	1	0	0	1.23457
Q13769_K142	THOC5	QK*EITK	THOC5_HUMAN THO complex subunit 5 homolog OS=Homo sapiens OX=9606 GN=THOC5 PE=1 SV=2	0	0	0	1	0	0	1.17647
P62258_K69	YWHAE	IISSIEQK*EENK	1433E_HUMAN 14-3-3 protein epsilon OS=Homo sapiens OX=9606 GN=YWHAE PE=1 SV=1	0	0	0	1	0	0	0.61728
P12268_K238	IMPDH2	DYPLASK*DAK	IMDH2_HUMAN Inosine-5'-monophosphate dehydrogenase 2 OS=Homo sapiens OX=9606 GN=IMPDH2 PE=1 SV=2	0	0	0	1	0	0	1.0101
O14654_K202	IRS4	LILESK*R	IRS4_HUMAN Insulin receptor substrate 4 OS=Homo sapiens OX=9606 GN=IRS4 PE=1 SV=1	0	0	0	1	0	0	0.66667
O00222_K682	GRM8	K*SVTAPK	GRM8_HUMAN Metabotropic glutamate receptor 8 OS=Homo sapiens OX=9606 GN=GRM8 PE=1 SV=2	0	0	0	1	0	0	0.83333
P11142_K451	HSPA8	AMTK*DNNLLGK	HSP7C_HUMAN Heat shock cognate 71 kDa protein OS=Homo sapiens OX=9606 GN=HSPA8 PE=1 SV=1	0	0	0	1	0	0	1.05847
Q99880_K6	H2BC13	PELAK*SAPAPK	H2B1L_HUMAN Histone H2B type 1-L OS=Homo sapiens OX=9606 GN=H2BC13 PE=1 SV=3	0	0	0	1	0	0	0.98039
P04075_K42	ALDOA	GILAADESTGSIAK*R	ALDOA_HUMAN Fructose-bisphosphate aldolase A OS=Homo sapiens OX=9606 GN=ALDOA PE=1 SV=2	0	0	0	1	0	0	1.44101
P24666_K156	ACP1	AFLEK*AH	PPAC_HUMAN Low molecular weight phosphotyrosine protein phosphatase OS=Homo sapiens OX=9606 GN=ACP1 PE=1 SV=3	0	0	0	1	0	0	1.38889
Q9P0L0_K125	VAPA	EAKPDELMDSK*LR	VAPA_HUMAN Vesicle-associated membrane protein-associated protein A OS=Homo sapiens OX=9606 GN=VAPA PE=1 SV=3	0	0	0	1	0	0	0.9901
P00918_K24	CA2	DFPIAK*GER	CAH2_HUMAN Carbonic anhydrase 2 OS=Homo sapiens OX=9606 GN=CA2 PE=1 SV=2	0	0	0	1	0	0	0.93458
P30086_K187	PEBP1	LYEQLSGK*	PEBP1_HUMAN Phosphatidylethanolamine-binding protein 1 OS=Homo sapiens OX=9606 GN=PEBP1 PE=1 SV=3	0	0	0	1	0	0	0.9434
P36578_K106	RPL4	MFAPTK*TWR	RL4_HUMAN 60S ribosomal protein L4 OS=Homo sapiens OX=9606 GN=RPL4 PE=1 SV=5	0	0	0	1	0	0	1.04167
P08238_K435	HSP90AB1	FYEAFSK*NLK	HS90B_HUMAN Heat shock protein HSP 90-beta OS=Homo sapiens OX=9606 GN=HSP90AB1 PE=1 SV=4	0	0	0	1	0	0	1.15649
P11940_K606	PABPC1	SK*VDEAVAVLQAHQAK	PABP1_HUMAN Polyadenylate-binding protein 1 OS=Homo sapiens OX=9606 GN=PABPC1 PE=1 SV=2	0	0	0	1	0	0	0.50251
P07910_K39	HNRNPC	SDVEAIFSK*YGK	HNRPC_HUMAN Heterogeneous nuclear ribonucleoproteins C1/C2 OS=Homo sapiens OX=9606 GN=HNRNPC PE=1 SV=4	0	0	0	1	0	0	0.84034
Q9H9B4_K320	SFXN1	VYFNK*GL	SFXN1_HUMAN Sideroflexin-1 OS=Homo sapiens OX=9606 GN=SFXN1 PE=1 SV=4	0	0	0	1	0	0	0.68493
P27824_K458	CANX	IVDDWANDGWGLK*K	CALX_HUMAN Calnexin OS=Homo sapiens OX=9606 GN=CANX PE=1 SV=2	0	0	0	1	0	0	1.0101
Q9Y490_K2099	TLN1	ALGDLISATK*AAAGK	TLN1_HUMAN Talin-1 OS=Homo sapiens OX=9606 GN=TLN1 PE=1 SV=3	0	0	0	1	0	0	0.9901
P16401_K49	H1-5	ATGPPVSELITK*AVAASK	H15_HUMAN Histone H1.5 OS=Homo sapiens OX=9606 GN=H1-5 PE=1 SV=3	0	0	0	1	0	0	0.63694
P49327_K1752	FASN	GVDLVLNSLAEEK*LQASVR	FAS_HUMAN Fatty acid synthase OS=Homo sapiens OX=9606 GN=FASN PE=1 SV=3	0	0	0	1	0	0	0.86957
Q9UNH7_K291	SNX6	VSADEDLK*LSDLLK	SNX6_HUMAN Sorting nexin-6 OS=Homo sapiens OX=9606 GN=SNX6 PE=1 SV=1	0	0	0	1	0	0	1.08696
Q99832_K292	CCT7	VVLSK*LPIGDVATQYFADR	TCPH_HUMAN T-complex protein 1 subunit eta OS=Homo sapiens OX=9606 GN=CCT7 PE=1 SV=2	0	0	0	1	0	0	0.9434
P08670_K97	VIM	LLQDSVDFSLADAINTEFK*NTR	VIME_HUMAN Vimentin OS=Homo sapiens OX=9606 GN=VIM PE=1 SV=4	0	0	0	1	0	0	0.97124
O00193_K13	SMAP	ESHPHGVK*R	SMAP_HUMAN Small acidic protein OS=Homo sapiens OX=9606 GN=SMAP PE=1 SV=1	0	0	0	0	1	0	0.9434
P35613_K375	BSG	SSGQHQNDK*GK	BASI_HUMAN Basigin OS=Homo sapiens OX=9606 GN=BSG PE=1 SV=2	0	0	0	0	2	0	0.918275
P18669_K106	PGAM1	AETAAK*HGEAQVK	PGAM1_HUMAN Phosphoglycerate mutase 1 OS=Homo sapiens OX=9606 GN=PGAM1 PE=1 SV=2	0	0	0	0	1	0	0.83333
P49736_K216	MCM2	THVDSHGHNVFK*ER	MCM2_HUMAN DNA replication licensing factor MCM2 OS=Homo sapiens OX=9606 GN=MCM2 PE=1 SV=4	0	0	0	0	1	0	0.72993
Q99729_K130	HNRNPAB	VLDQK*EHR	ROAA_HUMAN Heterogeneous nuclear ribonucleoprotein A/B OS=Homo sapiens OX=9606 GN=HNRNPAB PE=1 SV=2	0	0	0	0	1	0	0.52632
P84090_K41	ERH	MYEEHLK*R	ERH_HUMAN Enhancer of rudimentary homolog OS=Homo sapiens OX=9606 GN=ERH PE=1 SV=1	0	0	0	0	2	0	0.753355
P08621_K162	SNRNP70	DMHSAYK*HADGK	RU17_HUMAN U1 small nuclear ribonucleoprotein 70 kDa OS=Homo sapiens OX=9606 GN=SNRNP70 PE=1 SV=2	0	0	0	0	2	0	0.60271
P04406_K254	GAPDH	LEKPAK*YDDIKK	G3P_HUMAN Glyceraldehyde-3-phosphate dehydrogenase OS=Homo sapiens OX=9606 GN=GAPDH PE=1 SV=3	0	0	0	0	1	0	1.0989
P41250_K646	GARS1	HGVSHK*VDDSSGSIGR	GARS_HUMAN Glycine--tRNA ligase OS=Homo sapiens OX=9606 GN=GARS1 PE=1 SV=3	0	0	0	0	2	0	0.975545
P62937_K76	PPIA	HNGTGGK*SIYGEK HNGTGGK*SIYGEKFEDENFILK	PPIA_HUMAN Peptidyl-prolyl cis-trans isomerase A OS=Homo sapiens OX=9606 GN=PPIA PE=1 SV=2	0	0	0	0	2	2	0.88066
Q13247_K143	SRSF6	QAGEVTYADAHK*ER	SRSF6_HUMAN Serine/arginine-rich splicing factor 6 OS=Homo sapiens OX=9606 GN=SRSF6 PE=1 SV=2	0	0	0	0	1	0	0.96154
P08708_K32	RPS17	LGNDFHTNK*R	RS17_HUMAN 40S ribosomal protein S17 OS=Homo sapiens OX=9606 GN=RPS17 PE=1 SV=2	0	0	0	0	2	0	0.69901
P27797_K41	CALR	WIESK*HK	CALR_HUMAN Calreticulin OS=Homo sapiens OX=9606 GN=CALR PE=1 SV=1	0	0	0	0	1	0	0.89286
P29401_K314	TKT	VGDK*IATR	TKT_HUMAN Transketolase OS=Homo sapiens OX=9606 GN=TKT PE=1 SV=3	0	0	0	0	2	0	1.08181
P61247_K56	RPS3A	TQGTK*IASDGLK	RS3A_HUMAN 40S ribosomal protein S3a OS=Homo sapiens OX=9606 GN=RPS3A PE=1 SV=2	0	0	0	0	2	0	0.8778
P62847_K99	RPS24	HGLYEK*K	RS24_HUMAN 40S ribosomal protein S24 OS=Homo sapiens OX=9606 GN=RPS24 PE=1 SV=1	0	0	0	0	1	0	0.64458
O00193_K62	SMAP	LVIGDHK*STSHFR	SMAP_HUMAN Small acidic protein OS=Homo sapiens OX=9606 GN=SMAP PE=1 SV=1	0	0	0	0	1	0	1.07527
P53007_K255	SLC25A1	MQGLEAHK*YR	TXTP_HUMAN Tricarboxylate transport protein, mitochondrial OS=Homo sapiens OX=9606 GN=SLC25A1 PE=1 SV=2	0	0	0	0	1	0	0.73529
P62701_K211	RPS4X	ERHPGSFDVVHVK*DANGNSFATR	RS4X_HUMAN 40S ribosomal protein S4, X isoform OS=Homo sapiens OX=9606 GN=RPS4X PE=1 SV=2	0	0	0	0	2	0	1.37938
P10809_K87	HSPD1	SIDLK*DKYK	CH60_HUMAN 60 kDa heat shock protein, mitochondrial OS=Homo sapiens OX=9606 GN=HSPD1 PE=1 SV=2	0	0	0	0	1	0	0.81301
P29401_K16	TKT	LQALK*DTANR	TKT_HUMAN Transketolase OS=Homo sapiens OX=9606 GN=TKT PE=1 SV=3	0	0	0	0	1	0	1.04167
Q9NR30_K559	DDX21	AGIK*FK	DDX21_HUMAN Nucleolar RNA helicase 2 OS=Homo sapiens OX=9606 GN=DDX21 PE=1 SV=5	0	0	0	0	1	0	0.8
P27797_K276	CALR	GEWK*PR	CALR_HUMAN Calreticulin OS=Homo sapiens OX=9606 GN=CALR PE=1 SV=1	0	0	0	0	2	0	0.855485
O14579_K278	COPE	YLSQLK*DAHR	COPE_HUMAN Coatomer subunit epsilon OS=Homo sapiens OX=9606 GN=COPE PE=1 SV=3	0	0	0	0	2	0	1.12179
Q13442_K137	PDAP1	TEQAK*ADLAR	HAP28_HUMAN 28 kDa heat- and acid-stable phosphoprotein OS=Homo sapiens OX=9606 GN=PDAP1 PE=1 SV=1	0	0	0	0	1	0	0.77519
P39023_K115	RPL3	TVFAEHISDECK*R	RL3_HUMAN 60S ribosomal protein L3 OS=Homo sapiens OX=9606 GN=RPL3 PE=1 SV=2	0	0	0	0	1	1	0.438615
P50914_K79	RPL14	QAWQK*ADINTK	RL14_HUMAN 60S ribosomal protein L14 OS=Homo sapiens OX=9606 GN=RPL14 PE=1 SV=4	0	0	0	0	1	0	1.04167
P18669_K100	PGAM1	HYGGLTGLNK*AETAAK	PGAM1_HUMAN Phosphoglycerate mutase 1 OS=Homo sapiens OX=9606 GN=PGAM1 PE=1 SV=2	0	0	0	0	2	1	0.913487
Q15061_K451	WDR43	LGAMDIDTHK*K	WDR43_HUMAN WD repeat-containing protein 43 OS=Homo sapiens OX=9606 GN=WDR43 PE=1 SV=3	0	0	0	0	2	0	1.0299
P12277_K11	CKB	PFSNSHNALK*LR	KCRB_HUMAN Creatine kinase B-type OS=Homo sapiens OX=9606 GN=CKB PE=1 SV=1	0	0	0	0	2	0	0.80128
P61978_K422	HNRNPK	HESGASIK*IDEPLEGSEDR	HNRPK_HUMAN Heterogeneous nuclear ribonucleoprotein K OS=Homo sapiens OX=9606 GN=HNRNPK PE=1 SV=1	0	0	0	0	1	0	0.60241
O76021_K145	RSL1D1	SYEAK*LR	RL1D1_HUMAN Ribosomal L1 domain-containing protein 1 OS=Homo sapiens OX=9606 GN=RSL1D1 PE=1 SV=3	0	0	0	0	2	0	0.96724
P62424_K217	RPL7A	GALAK*LVEAIR	RL7A_HUMAN 60S ribosomal protein L7a OS=Homo sapiens OX=9606 GN=RPL7A PE=1 SV=2	0	0	0	0	1	0	0.96154
Q9BZE4_K534	GTPBP4	SLGVDMDDK*DDAHYAVQAR	NOG1_HUMAN Nucleolar GTP-binding protein 1 OS=Homo sapiens OX=9606 GN=GTPBP4 PE=1 SV=3	0	0	0	0	1	0	1.09555
P60842_K309	EIF4A1	DFTVSAMHGDMDQK*ER	IF4A1_HUMAN Eukaryotic initiation factor 4A-I OS=Homo sapiens OX=9606 GN=EIF4A1 PE=1 SV=1	0	0	0	0	2	0	1.45815
P22314_K68	UBA1	QLYVLGHEAMK*R	UBA1_HUMAN Ubiquitin-like modifier-activating enzyme 1 OS=Homo sapiens OX=9606 GN=UBA1 PE=1 SV=3	0	0	0	0	2	0	1.12899
P07900_K74	HSP90AA1	YESLTDPSKLDSGK*ELHINLIPNKQDR	HS90A_HUMAN Heat shock protein HSP 90-alpha OS=Homo sapiens OX=9606 GN=HSP90AA1 PE=1 SV=5	0	0	0	0	2	0	1.01331
P05023_K45	ATP1A1	EVSMDDHK*LSLDELHR	AT1A1_HUMAN Sodium/potassium-transporting ATPase subunit alpha-1 OS=Homo sapiens OX=9606 GN=ATP1A1 PE=1 SV=1	0	0	0	0	1	0	0.75758
P43243_K245	MATR3	CRDDSFFGETSHNYHK*FDSEYER	MATR3_HUMAN Matrin-3 OS=Homo sapiens OX=9606 GN=MATR3 PE=1 SV=2	0	0	0	0	2	0	0.92621
P18669_K39	PGAM1	FSGWYDADLSPAGHEEAK*R	PGAM1_HUMAN Phosphoglycerate mutase 1 OS=Homo sapiens OX=9606 GN=PGAM1 PE=1 SV=2	0	0	0	0	2	2	0.892575
P51153_K172	RAB13	DILLK*SGGR	RAB13_HUMAN Ras-related protein Rab-13 OS=Homo sapiens OX=9606 GN=RAB13 PE=1 SV=1	0	0	0	0	1	0	1.08696
Q15008_K117	PSMD6	IGDK*EGALTAFR	PSMD6_HUMAN 26S proteasome non-ATPase regulatory subunit 6 OS=Homo sapiens OX=9606 GN=PSMD6 PE=1 SV=1	0	0	0	0	2	0	0.917465
Q96HS1_K88	PGAM5	NVESGEEELASK*LDHYK	PGAM5_HUMAN Serine/threonine-protein phosphatase PGAM5, mitochondrial OS=Homo sapiens OX=9606 GN=PGAM5 PE=1 SV=2	0	0	0	0	1	0	0.75797
P08758_K97	ANXA5	LYDAYELK*HALK	ANXA5_HUMAN Annexin A5 OS=Homo sapiens OX=9606 GN=ANXA5 PE=1 SV=2	0	0	0	0	1	0	0.70922
P31943_K98	HNRNPH1	SNNVEMDWVLK*HTGPNSPDTANDGFVR	HNRH1_HUMAN Heterogeneous nuclear ribonucleoprotein H OS=Homo sapiens OX=9606 GN=HNRNPH1 PE=1 SV=4	0	0	0	0	2	0	0.895595
P0DMV9_K88	HSPA1B	FGDPVVQSDMK*HWPFQVINDGDKPK	HS71B_HUMAN Heat shock 70 kDa protein 1B OS=Homo sapiens OX=9606 GN=HSPA1B PE=1 SV=1	0	0	0	0	1	0	1.04101
Q13155_K70	AIMP2	LYELK*AAVDGLSK	AIMP2_HUMAN Aminoacyl tRNA synthase complex-interacting multifunctional protein 2 OS=Homo sapiens OX=9606 GN=AIMP2 PE=1 SV=2	0	0	0	0	1	0	0.88496
P17066_K330	HSPA6	LDK*AQIHDVVLVGGSTR	HSP76_HUMAN Heat shock 70 kDa protein 6 OS=Homo sapiens OX=9606 GN=HSPA6 PE=1 SV=2	0	0	0	0	2	0	0.91653
P07900_K478	HSP90AA1	YYTSASGDEMVSLK*DYCTR	HS90A_HUMAN Heat shock protein HSP 90-alpha OS=Homo sapiens OX=9606 GN=HSP90AA1 PE=1 SV=5	0	0	0	0	2	0	0.743805
P61204_K142	ARF3	QDLPNAMNAAEITDK*LGLHSLR	ARF3_HUMAN ADP-ribosylation factor 3 OS=Homo sapiens OX=9606 GN=ARF3 PE=1 SV=2	0	0	0	0	1	0	0.9009
P78527_K2683	PRKDC	SSFDWLTGSSTDPLVDHTSPSSDSLLFAHK*R	PRKDC_HUMAN DNA-dependent protein kinase catalytic subunit OS=Homo sapiens OX=9606 GN=PRKDC PE=1 SV=3	0	0	0	0	1	0	0.85764
P53621_K198	COPA	GITGVDLFGTTDAVVK*HVLEGHDR	COPA_HUMAN Coatomer subunit alpha OS=Homo sapiens OX=9606 GN=COPA PE=1 SV=2	0	0	0	0	1	0	0.84746
Q16543_K101	CDC37	SWEQK*LEEMR	CDC37_HUMAN Hsp90 co-chaperone Cdc37 OS=Homo sapiens OX=9606 GN=CDC37 PE=1 SV=1	0	0	0	0	2	0	0.80046
P0DP23_K14	CALM1	K*EAFSLFDKDGDGTITTK	CALM1_HUMAN Calmodulin-1 OS=Homo sapiens OX=9606 GN=CALM1 PE=1 SV=1	0	0	0	0	1	0	0.70423
P22626_K168	HNRNPA2B1	GFGFVTFDDHDPVDK*IVLQK	ROA2_HUMAN Heterogeneous nuclear ribonucleoproteins A2/B1 OS=Homo sapiens OX=9606 GN=HNRNPA2B1 PE=1 SV=2	0	0	0	0	2	2	0.974688
O14737_K33	PDCD5	HGDPGDAAQQEAK*HR	PDCD5_HUMAN Programmed cell death protein 5 OS=Homo sapiens OX=9606 GN=PDCD5 PE=1 SV=3	0	0	0	0	1	0	0.76336
Q9NR45_K85	NANS	TYGEHK*R	SIAS_HUMAN Sialic acid synthase OS=Homo sapiens OX=9606 GN=NANS PE=1 SV=2	0	0	0	0	1	0	0.91743
Q14739_K107	LBR	SASASHQADIK*EAR	LBR_HUMAN Delta(14)-sterol reductase LBR OS=Homo sapiens OX=9606 GN=LBR PE=1 SV=2	0	0	0	0	1	0	0.90909
P04406_K61	GAPDH	FHGTVK*AENGK	G3P_HUMAN Glyceraldehyde-3-phosphate dehydrogenase OS=Homo sapiens OX=9606 GN=GAPDH PE=1 SV=3	0	0	0	0	1	0	0.52632
P31948_K486	STIP1	HDSPEDVK*R	STIP1_HUMAN Stress-induced-phosphoprotein 1 OS=Homo sapiens OX=9606 GN=STIP1 PE=1 SV=1	0	0	0	0	1	1	0.802985
P61981_K162	YWHAG	AYSEAHEISK*EHMQPTHPIR	1433G_HUMAN 14-3-3 protein gamma OS=Homo sapiens OX=9606 GN=YWHAG PE=1 SV=2	0	0	0	0	1	0	1.17647
Q96CW1_K167	AP2M1	EGIK*YR	AP2M1_HUMAN AP-2 complex subunit mu OS=Homo sapiens OX=9606 GN=AP2M1 PE=1 SV=2	0	0	0	0	1	0	0.95238
Q14980_K751	NUMA1	SLVEQHK*R	NUMA1_HUMAN Nuclear mitotic apparatus protein 1 OS=Homo sapiens OX=9606 GN=NUMA1 PE=1 SV=2	0	0	0	0	1	0	0.8
P62241_K10	RPS8	DNWHK*R	RS8_HUMAN 40S ribosomal protein S8 OS=Homo sapiens OX=9606 GN=RPS8 PE=1 SV=2	0	0	0	0	1	0	1.20482
P27824_K217	CANX	TGIYEEK*HAK	CALX_HUMAN Calnexin OS=Homo sapiens OX=9606 GN=CANX PE=1 SV=2	0	0	0	0	1	0	0.77519
P22392_K124	NME2	NIIHGSDSVK*SAEK	NDKB_HUMAN Nucleoside diphosphate kinase B OS=Homo sapiens OX=9606 GN=NME2 PE=1 SV=1	0	0	0	0	1	1	0.98124
P12268_K511	IMPDH2	TSSAQVEGGVHSLHSYEK*R	IMDH2_HUMAN Inosine-5'-monophosphate dehydrogenase 2 OS=Homo sapiens OX=9606 GN=IMPDH2 PE=1 SV=2	0	0	0	0	1	0	0.75188
Q01518_K287	CAP1	NPALK*AQSGPVR	CAP1_HUMAN Adenylyl cyclase-associated protein 1 OS=Homo sapiens OX=9606 GN=CAP1 PE=1 SV=5	0	0	0	0	1	0	0.65789
P19338_K545	NCL	EALNSCNK*R	NUCL_HUMAN Nucleolin OS=Homo sapiens OX=9606 GN=NCL PE=1 SV=3	0	0	0	0	1	0	0.5814
O00330_K194	PDHX	NILEK*HSLDASQGTATGPR	ODPX_HUMAN Pyruvate dehydrogenase protein X component, mitochondrial OS=Homo sapiens OX=9606 GN=PDHX PE=1 SV=3	0	0	0	0	1	0	0.73529
P04844_K31	RPN2	LTPTHYLTK*HDVER	RPN2_HUMAN Dolichyl-diphosphooligosaccharide--protein glycosyltransferase subunit 2 OS=Homo sapiens OX=9606 GN=RPN2 PE=1 SV=3	0	0	0	0	1	0	0.4878
P04075_K13	ALDOA	PYQYPALTPEQK*KELSDIAHR PYQYPALTPEQK*K	ALDOA_HUMAN Fructose-bisphosphate aldolase A OS=Homo sapiens OX=9606 GN=ALDOA PE=1 SV=2	0	0	0	0	1	0	1.07159
P50990_K20	CCT8	EGAK*HFSGLEEAVYR	TCPQ_HUMAN T-complex protein 1 subunit theta OS=Homo sapiens OX=9606 GN=CCT8 PE=1 SV=4	0	0	0	0	1	0	0.98039
Q99615_K306	DNAJC7	GTVNSK*LR	DNJC7_HUMAN DnaJ homolog subfamily C member 7 OS=Homo sapiens OX=9606 GN=DNAJC7 PE=1 SV=2	0	0	0	0	1	0	0.5618
Q02878_K237	RPL6	HQEGEIFDTEK*EKYEITEQR	RL6_HUMAN 60S ribosomal protein L6 OS=Homo sapiens OX=9606 GN=RPL6 PE=1 SV=3	0	0	0	0	1	0	0.83333
P12268_K422	IMPDH2	GMGSLDAMDK*HLSSQNR	IMDH2_HUMAN Inosine-5'-monophosphate dehydrogenase 2 OS=Homo sapiens OX=9606 GN=IMPDH2 PE=1 SV=2	0	0	0	0	1	0	0.56497
Q9UBB6_K283	NCDN	NPALK*LAAR	NCDN_HUMAN Neurochondrin OS=Homo sapiens OX=9606 GN=NCDN PE=1 SV=1	0	0	0	0	1	0	1.02696
Q13561_K65	DCTN2	VGTK*GLDFSDR	DCTN2_HUMAN Dynactin subunit 2 OS=Homo sapiens OX=9606 GN=DCTN2 PE=1 SV=4	0	0	0	0	1	0	1.75439
P34897_K474	SHMT2	SFLLK*DSETSQR	GLYM_HUMAN Serine hydroxymethyltransferase, mitochondrial OS=Homo sapiens OX=9606 GN=SHMT2 PE=1 SV=3	0	0	0	0	1	0	0.84746
Q9NVM9_K604	INTS13	LK*GILER	INT13_HUMAN Integrator complex subunit 13 OS=Homo sapiens OX=9606 GN=INTS13 PE=1 SV=2	0	0	0	0	1	0	1.2987
Q14683_K851	SMC1A	DENEIEK*LK	SMC1A_HUMAN Structural maintenance of chromosomes protein 1A OS=Homo sapiens OX=9606 GN=SMC1A PE=1 SV=2	0	0	0	0	1	0	5
P31948_K68	STIP1	TVDLK*PDWGK	STIP1_HUMAN Stress-induced-phosphoprotein 1 OS=Homo sapiens OX=9606 GN=STIP1 PE=1 SV=1	0	0	0	0	1	0	0.75758
P13667_K629	PDIA4	FEGGDRDLEHLSK*FIEEHATK	PDIA4_HUMAN Protein disulfide-isomerase A4 OS=Homo sapiens OX=9606 GN=PDIA4 PE=1 SV=2	0	0	0	0	1	0	0.96154
Q15046_K175	KARS1	SEEEFIHINNK*LR	SYK_HUMAN Lysine--tRNA ligase OS=Homo sapiens OX=9606 GN=KARS1 PE=1 SV=3	0	0	0	0	1	0	0.97087
P53396_K780	ACLY	NQALK*EAGVFVPR	ACLY_HUMAN ATP-citrate synthase OS=Homo sapiens OX=9606 GN=ACLY PE=1 SV=3	0	0	0	0	1	0	1.36986
P62081_K169	RPS7	AQQNNVEHK*VETFSGVYK	RS7_HUMAN 40S ribosomal protein S7 OS=Homo sapiens OX=9606 GN=RPS7 PE=1 SV=1	0	0	0	0	1	0	0.71942
P07900_K499	HSP90AA1	HIYYITGETK*DQVANSAFVER	HS90A_HUMAN Heat shock protein HSP 90-alpha OS=Homo sapiens OX=9606 GN=HSP90AA1 PE=1 SV=5	0	0	0	0	1	0	0.86712
P52597_K98	HNRNPF	TEMDWVLK*HSGPNSADSANDGFVR	HNRPF_HUMAN Heterogeneous nuclear ribonucleoprotein F OS=Homo sapiens OX=9606 GN=HNRNPF PE=1 SV=3	0	0	0	0	1	0	0.36765
O75694_K1386	NUP155	SLQAK*LER	NU155_HUMAN Nuclear pore complex protein Nup155 OS=Homo sapiens OX=9606 GN=NUP155 PE=1 SV=1	0	0	0	0	1	0	0.70423
Q9Y266_K289	NUDC	SMVEK*MMYDQR	NUDC_HUMAN Nuclear migration protein nudC OS=Homo sapiens OX=9606 GN=NUDC PE=1 SV=1	0	0	0	0	1	0	0.9901
P49411_K311	TUFM	TVVTGIEMFHK*SLER	EFTU_HUMAN Elongation factor Tu, mitochondrial OS=Homo sapiens OX=9606 GN=TUFM PE=1 SV=2	0	0	0	0	1	0	0.94789
P19338_K624	NCL	GFGFVDFNSEEDAK*AAK	NUCL_HUMAN Nucleolin OS=Homo sapiens OX=9606 GN=NCL PE=1 SV=3	0	0	0	0	1	1	1.00575
O75643_K944	SNRNP200	SPTLYGISHDDLK*GDPLLDQR	U520_HUMAN U5 small nuclear ribonucleoprotein 200 kDa helicase OS=Homo sapiens OX=9606 GN=SNRNP200 PE=1 SV=2	0	0	0	0	1	0	1.13636
P45880_K285	VDAC2	SINAGGHK*VGLALELEA	VDAC2_HUMAN Voltage-dependent anion-selective channel protein 2 OS=Homo sapiens OX=9606 GN=VDAC2 PE=1 SV=2	0	0	0	0	1	0	0.82645
P17844_K236	DDX5	LIDFLECGK*TNLR	DDX5_HUMAN Probable ATP-dependent RNA helicase DDX5 OS=Homo sapiens OX=9606 GN=DDX5 PE=1 SV=1	0	0	0	0	1	1	0.734065
Q9NY30_K188	BTG4	K*NVVDGR	BTG4_HUMAN Protein BTG4 OS=Homo sapiens OX=9606 GN=BTG4 PE=2 SV=1	0	0	0	0	0	1	1.11111
P14618_K261	PKM	VLGEK*GK	KPYM_HUMAN Pyruvate kinase PKM OS=Homo sapiens OX=9606 GN=PKM PE=1 SV=4	0	0	0	0	0	1	1.0989
P20700_K342	LMNB1	MLTDK*ER	LMNB1_HUMAN Lamin-B1 OS=Homo sapiens OX=9606 GN=LMNB1 PE=1 SV=2	0	0	0	0	0	1	0.86957
P30153_K255	PPP2R1A	QAAEDK*SWR	2AAA_HUMAN Serine/threonine-protein phosphatase 2A 65 kDa regulatory subunit A alpha isoform OS=Homo sapiens OX=9606 GN=PPP2R1A PE=1 SV=4	0	0	0	0	0	1	0.99657
P19338_K377	NCL	VFGNEIK*LEKPK	NUCL_HUMAN Nucleolin OS=Homo sapiens OX=9606 GN=NCL PE=1 SV=3	0	0	0	0	0	1	0.84746
P42677_K5	RPS27	PLAK*DLLHPSPEEEKR PLAK*DLLHPSPEEEK	RS27_HUMAN 40S ribosomal protein S27 OS=Homo sapiens OX=9606 GN=RPS27 PE=1 SV=3	0	0	0	0	0	1	0.71607
P62424_K48	RPL7A	NFGIGQDIQPK*R	RL7A_HUMAN 60S ribosomal protein L7a OS=Homo sapiens OX=9606 GN=RPL7A PE=1 SV=2	0	0	0	0	0	2	1.04099
Q99593_K90	TBX5	VK*VTGLNPK	TBX5_HUMAN T-box transcription factor TBX5 OS=Homo sapiens OX=9606 GN=TBX5 PE=1 SV=2	0	0	0	0	0	1	0.60241
P06733_K228	ENO1	EGLELLK*TAIGK	ENOA_HUMAN Alpha-enolase OS=Homo sapiens OX=9606 GN=ENO1 PE=1 SV=2	0	0	0	0	0	1	1.06383
Q8WWI1_K773	LMO7	QALEK*SK	LMO7_HUMAN LIM domain only protein 7 OS=Homo sapiens OX=9606 GN=LMO7 PE=1 SV=3	0	0	0	0	0	1	0.84034
P46776_K27	RPL27A	K*HPGGR	RL27A_HUMAN 60S ribosomal protein L27a OS=Homo sapiens OX=9606 GN=RPL27A PE=1 SV=2	0	0	0	0	0	1	0.71942
P11142_K524	HSPA8	MVQEAEK*YKAEDEKQR	HSP7C_HUMAN Heat shock cognate 71 kDa protein OS=Homo sapiens OX=9606 GN=HSPA8 PE=1 SV=1	0	0	0	0	0	1	1.03869
A5A3E0_K813	POTEF	VAPEEHPVLLTEATLNPK*ANR	POTEF_HUMAN POTE ankyrin domain family member F OS=Homo sapiens OX=9606 GN=POTEF PE=1 SV=2	0	0	0	0	0	1	0.60241
P00558_K131	PGK1	FHVEEEGK*GK	PGK1_HUMAN Phosphoglycerate kinase 1 OS=Homo sapiens OX=9606 GN=PGK1 PE=1 SV=3	0	0	0	0	0	1	0.66225
P08397_K27	HMBS	K*SQLAR	HEM3_HUMAN Porphobilinogen deaminase OS=Homo sapiens OX=9606 GN=HMBS PE=1 SV=2	0	0	0	0	0	1	0.70922
Q01105_K167	SET	EFHLNESGDPSSK*STEIK	SET_HUMAN Protein SET OS=Homo sapiens OX=9606 GN=SET PE=1 SV=3	0	0	0	0	0	1	1.19048
P61247_K63	RPS3A	IASDGLK*GR	RS3A_HUMAN 40S ribosomal protein S3a OS=Homo sapiens OX=9606 GN=RPS3A PE=1 SV=2	0	0	0	0	0	1	1.07527
P37837_K321	TALDO1	FAADAVK*LER	TALDO_HUMAN Transaldolase OS=Homo sapiens OX=9606 GN=TALDO1 PE=1 SV=2	0	0	0	0	0	1	0.89286
P22314_K671	UBA1	QPAENVNQYLTDPK*FVER	UBA1_HUMAN Ubiquitin-like modifier-activating enzyme 1 OS=Homo sapiens OX=9606 GN=UBA1 PE=1 SV=3	0	0	0	0	0	1	1.14943
P10809_K389	HSPD1	IQEIIEQLDVTTSEYEKEK*LNER	CH60_HUMAN 60 kDa heat shock protein, mitochondrial OS=Homo sapiens OX=9606 GN=HSPD1 PE=1 SV=2	0	0	0	0	0	1	0.71942
