# Supplementary material for: A Paal–Knorr agent for chemoproteomic profiling of targets of isoketals in cells
Source: Chem Sci. 2021 Oct 15;12(43):14557–63. doi: 10.1039/d1sc02230j (PMC8580055; doi:10.1039/d1sc02230j)
Supplement: SC-012-D1SC02230J-s006 [file SC-012-D1SC02230J-s006.xlsx]

## Sheet: ONAyne, 1 mM vs 0.1 mM
Identifier	Genename	Modified sequences	Description	ONAyne_1 vs 0.1 mM	Annotation	Modification
A0AVT1_K800	UBA6	IQEFKPSNK*VVQTDETAR	UBA6_HUMAN Ubiquitin-like modifier-activating enzyme 6 OS=Homo sapiens OX=9606 GN=UBA6 PE=1 SV=1	0.80645
A5A3E0_K813	POTEF	VAPEEHPVLLTEATLNPK*ANR	POTEF_HUMAN POTE ankyrin domain family member F OS=Homo sapiens OX=9606 GN=POTEF PE=1 SV=2	4.38421
A5D8V7_K77	CCDC151	K*IQLLEGDR	CC151_HUMAN Coiled-coil domain-containing protein 151 OS=Homo sapiens OX=9606 GN=CCDC151 PE=1 SV=1	10
A6NDG6_K80	PGP	AAYAEK*LR	PGP_HUMAN Glycerol-3-phosphate phosphatase OS=Homo sapiens OX=9606 GN=PGP PE=1 SV=1	1.26582
A6NIV6_K271	LRRIQ4	LEK*VPR	LRIQ4_HUMAN Leucine-rich repeat and IQ domain-containing protein 4 OS=Homo sapiens OX=9606 GN=LRRIQ4 PE=4 SV=2	2.94118
A6NIZ1_K174		TPVPGK*AR	RP1BL_HUMAN Ras-related protein Rap-1b-like protein OS=Homo sapiens OX=9606 PE=2 SV=1	1.49254
A8MU46_K381	SMTNL1	AAGAAIGGVK*	SMTL1_HUMAN Smoothelin-like protein 1 OS=Homo sapiens OX=9606 GN=SMTNL1 PE=1 SV=2	1.2987
B1NKR5_K2		MK*VLALR	VP3_ROTAD Protein VP3 OS=Rotavirus A (strain RVA/Human/United States/D/1974/G1P1A[8]) OX=578831 PE=3 SV=1	0.05989
B8XTP8_K1313		DLVDMIVK*R	POLG_COSAA Genome polyprotein OS=Cosavirus A (isolate Human/Pakistan/0553/-) OX=1554483 PE=3 SV=1	2.38095
E9PAV3_K2005	NACA	IEDLSQQAQLAAAEK*FK	NACAM_HUMAN Nascent polypeptide-associated complex subunit alpha, muscle-specific form OS=Homo sapiens OX=9606 GN=NACA PE=1 SV=1	9.09091	Modified residue$Cross-link	Note=N6-acetyllysine%3B alternate;Ontology_term=ECO:0007744;evidence=ECO:0007744|PubMed:19608861;Dbxref=PMID:19608861$Note=Glycyl lysine isopeptide (Lys-Gly) (interchain with G-Cter in SUMO2)%3B alternate;Ontology_term=ECO:0007744;evidence=ECO:0007744|PubMed:28112733;Dbxref=PMID:28112733
O00116_K347	AGPS	GIIEK*SCQGPR	ADAS_HUMAN Alkyldihydroxyacetonephosphate synthase, peroxisomal OS=Homo sapiens OX=9606 GN=AGPS PE=1 SV=1	1.01021	Modified residue	Note=N6-acetyllysine;Ontology_term=ECO:0007744;evidence=ECO:0007744|PubMed:19608861;Dbxref=PMID:19608861
O00148_K162	DDX39A	K*NCPHVVVGTPGR	DX39A_HUMAN ATP-dependent RNA helicase DDX39A OS=Homo sapiens OX=9606 GN=DDX39A PE=1 SV=2	0.95238	Cross-link	Note=Glycyl lysine isopeptide (Lys-Gly) (interchain with G-Cter in SUMO2);Ontology_term=ECO:0007744;evidence=ECO:0007744|PubMed:28112733;Dbxref=PMID:28112733
O00148_K269	DDX39A	LK*DSEKNR	DX39A_HUMAN ATP-dependent RNA helicase DDX39A OS=Homo sapiens OX=9606 GN=DDX39A PE=1 SV=2	0.63694
O00148_K333	DDX39A	YQQFK*DFQR	DX39A_HUMAN ATP-dependent RNA helicase DDX39A OS=Homo sapiens OX=9606 GN=DDX39A PE=1 SV=2	3.75902
O00154_K198	ACOT7	YEAQK*LER	BACH_HUMAN Cytosolic acyl coenzyme A thioester hydrolase OS=Homo sapiens OX=9606 GN=ACOT7 PE=1 SV=3	1.55421	Modified residue	Note=N6-acetyllysine;Ontology_term=ECO:0007744;evidence=ECO:0007744|PubMed:19608861;Dbxref=PMID:19608861
O00154_K369	ACOT7	YLQMK*AK	BACH_HUMAN Cytosolic acyl coenzyme A thioester hydrolase OS=Homo sapiens OX=9606 GN=ACOT7 PE=1 SV=3	0.73529
O00170_K112	AIP	NIAVGK*DPLEGQR	AIP_HUMAN AH receptor-interacting protein OS=Homo sapiens OX=9606 GN=AIP PE=1 SV=2	1.12417
O00170_K196	AIP	EGHVK*EAAAK	AIP_HUMAN AH receptor-interacting protein OS=Homo sapiens OX=9606 GN=AIP PE=1 SV=2	0.84034
O00178_K453	GTPBP1	MPVK*EVR	GTPB1_HUMAN GTP-binding protein 1 OS=Homo sapiens OX=9606 GN=GTPBP1 PE=1 SV=3	9.09091
O00193_K62	SMAP	LVIGDHK*STSHFR	SMAP_HUMAN Small acidic protein OS=Homo sapiens OX=9606 GN=SMAP PE=1 SV=1	6.91624	Cross-link	Note=Glycyl lysine isopeptide (Lys-Gly) (interchain with G-Cter in SUMO2);Ontology_term=ECO:0007744;evidence=ECO:0007744|PubMed:28112733;Dbxref=PMID:28112733
O00231_K32	PSMD11	EASIDILHSIVK*R	PSD11_HUMAN 26S proteasome non-ATPase regulatory subunit 11 OS=Homo sapiens OX=9606 GN=PSMD11 PE=1 SV=3	1.06962
O00232_K221	PSMD12	FFQEENTEK*LK	PSD12_HUMAN 26S proteasome non-ATPase regulatory subunit 12 OS=Homo sapiens OX=9606 GN=PSMD12 PE=1 SV=3	0.71942	Modified residue	Note=N6-acetyllysine;Ontology_term=ECO:0007744;evidence=ECO:0007744|PubMed:19608861;Dbxref=PMID:19608861
O00232_K98	PSMD12	SQLK*QAVAK	PSD12_HUMAN 26S proteasome non-ATPase regulatory subunit 12 OS=Homo sapiens OX=9606 GN=PSMD12 PE=1 SV=3	1.69492
O00244_K25	ATOX1	VLNK*LGGVK	ATOX1_HUMAN Copper transport protein ATOX1 OS=Homo sapiens OX=9606 GN=ATOX1 PE=1 SV=1	0.922255
O00264_K102	PGRMC1	VFDVTK*GR	PGRC1_HUMAN Membrane-associated progesterone receptor component 1 OS=Homo sapiens OX=9606 GN=PGRMC1 PE=1 SV=3	1.34282
O00267_K344	SUPT5H	LFDAEK*IR	SPT5H_HUMAN Transcription elongation factor SPT5 OS=Homo sapiens OX=9606 GN=SUPT5H PE=1 SV=1	5.26316
O00299_K119	CLIC1	FSAYIK*NSNPALNDNLEK	CLIC1_HUMAN Chloride intracellular channel protein 1 OS=Homo sapiens OX=9606 GN=CLIC1 PE=1 SV=4	6.66667	Modified residue	Note=N6-acetyllysine;Ontology_term=ECO:0007744;evidence=ECO:0007744|PubMed:19608861;Dbxref=PMID:19608861
O00299_K131	CLIC1	NSNPALNDNLEK*GLLK	CLIC1_HUMAN Chloride intracellular channel protein 1 OS=Homo sapiens OX=9606 GN=CLIC1 PE=1 SV=4	0.677753	Modified residue	Note=N6-acetyllysine;Ontology_term=ECO:0007744;evidence=ECO:0007744|PubMed:19608861;Dbxref=PMID:19608861
O00299_K135	CLIC1	GLIK*ALK	CLIC1_HUMAN Chloride intracellular channel protein 1 OS=Homo sapiens OX=9606 GN=CLIC1 PE=1 SV=4	0.824262
O00410_K108	IPO5	K*VCDIAAELAR	IPO5_HUMAN Importin-5 OS=Homo sapiens OX=9606 GN=IPO5 PE=1 SV=4	0.496827
O00410_K800	IPO5	AK*LEEHFK	IPO5_HUMAN Importin-5 OS=Homo sapiens OX=9606 GN=IPO5 PE=1 SV=4	0.2045
O00410_K961	IPO5	VIQSADSK*TK	IPO5_HUMAN Importin-5 OS=Homo sapiens OX=9606 GN=IPO5 PE=1 SV=4	0.585483
O00425_K450	IGF2BP3	PDAK*VR	IF2B3_HUMAN Insulin-like growth factor 2 mRNA-binding protein 3 OS=Homo sapiens OX=9606 GN=IGF2BP3 PE=1 SV=2	1.28425	Cross-link	Note=Glycyl lysine isopeptide (Lys-Gly) (interchain with G-Cter in SUMO2);Ontology_term=ECO:0007744;evidence=ECO:0007744|PubMed:28112733;Dbxref=PMID:28112733
O00571_K118	DDX3X	SGFGK*FER	DDX3X_HUMAN ATP-dependent RNA helicase DDX3X OS=Homo sapiens OX=9606 GN=DDX3X PE=1 SV=3	2.68199	Modified residue	Note=N6-acetyllysine;Ontology_term=ECO:0007744;evidence=ECO:0007744|PubMed:19608861;Dbxref=PMID:19608861
O00571_K255	DDX3X	AMK*ENGR	DDX3X_HUMAN ATP-dependent RNA helicase DDX3X OS=Homo sapiens OX=9606 GN=DDX3X PE=1 SV=3	0.975915
O00571_K81	DDX3X	GK*SSFFSDR	DDX3X_HUMAN ATP-dependent RNA helicase DDX3X OS=Homo sapiens OX=9606 GN=DDX3X PE=1 SV=3	10
O00592_K385	PODXL	AVK*ATFNPAQDK	PODXL_HUMAN Podocalyxin OS=Homo sapiens OX=9606 GN=PODXL PE=1 SV=2	0.621415
O00592_K431	PODXL	LKDK*WDELK	PODXL_HUMAN Podocalyxin OS=Homo sapiens OX=9606 GN=PODXL PE=1 SV=2	2.85115
O00622_K262	CCN1	LVK*ETR	CCN1_HUMAN CCN family member 1 OS=Homo sapiens OX=9606 GN=CCN1 PE=1 SV=1	0.870015
O00622_K378	CCN1	LFNDIHK*FR	CCN1_HUMAN CCN family member 1 OS=Homo sapiens OX=9606 GN=CCN1 PE=1 SV=1	2.53293
O14579_K278	COPE	YLSQLK*DAHR	COPE_HUMAN Coatomer subunit epsilon OS=Homo sapiens OX=9606 GN=COPE PE=1 SV=3	3.23659
O14602_K104	EIF1AY	SLK*AYGELPEHAK	IF1AY_HUMAN Eukaryotic translation initiation factor 1A, Y-chromosomal OS=Homo sapiens OX=9606 GN=EIF1AY PE=1 SV=4	5.26316
O14737_K20	PDCD5	LAELQAK*HGDPGDAAQQEAK	PDCD5_HUMAN Programmed cell death protein 5 OS=Homo sapiens OX=9606 GN=PDCD5 PE=1 SV=3	3.86979
O14737_K33	PDCD5	HGDPGDAAQQEAK*HR	PDCD5_HUMAN Programmed cell death protein 5 OS=Homo sapiens OX=9606 GN=PDCD5 PE=1 SV=3	1.25359
O14737_K98	PDCD5	K*VSQQTEK	PDCD5_HUMAN Programmed cell death protein 5 OS=Homo sapiens OX=9606 GN=PDCD5 PE=1 SV=3	0.95238
O14818_K166	PSMA7	GAK*SVR	PSA7_HUMAN Proteasome subunit alpha type-7 OS=Homo sapiens OX=9606 GN=PSMA7 PE=1 SV=1	0.79929
O14828_K102	SCAMP3	K*QEELNR	SCAM3_HUMAN Secretory carrier-associated membrane protein 3 OS=Homo sapiens OX=9606 GN=SCAMP3 PE=1 SV=3	0.70922
O14908_K199	GIPC1	LLK*ELPR	GIPC1_HUMAN PDZ domain-containing protein GIPC1 OS=Homo sapiens OX=9606 GN=GIPC1 PE=1 SV=2	8.88889
O14908_K210	GIPC1	TFTLK*LTEPR	GIPC1_HUMAN PDZ domain-containing protein GIPC1 OS=Homo sapiens OX=9606 GN=GIPC1 PE=1 SV=2	10
O14949_K73	UQCRQ	K*NPAAYENDK	QCR8_HUMAN Cytochrome b-c1 complex subunit 8 OS=Homo sapiens OX=9606 GN=UQCRQ PE=1 SV=4	9.09091
O14980_K446	XPO1	EFMK*DTDSINLYK	XPO1_HUMAN Exportin-1 OS=Homo sapiens OX=9606 GN=XPO1 PE=1 SV=1	5.26316	Modified residue	Note=N6-acetyllysine;Ontology_term=ECO:0007744;evidence=ECO:0007744|PubMed:19608861;Dbxref=PMID:19608861
O14980_K693	XPO1	QLGSILK*TNVR	XPO1_HUMAN Exportin-1 OS=Homo sapiens OX=9606 GN=XPO1 PE=1 SV=1	0.2331	Modified residue	Note=N6-acetyllysine;Ontology_term=ECO:0007744;evidence=ECO:0007744|PubMed:19608861;Dbxref=PMID:19608861
O15042_K80	U2SURP	PLLENK*LK	SR140_HUMAN U2 snRNP-associated SURP motif-containing protein OS=Homo sapiens OX=9606 GN=U2SURP PE=1 SV=2	0.2008	Cross-link	Note=Glycyl lysine isopeptide (Lys-Gly) (interchain with G-Cter in SUMO2);Ontology_term=ECO:0007744;evidence=ECO:0007744|PubMed:28112733;Dbxref=PMID:28112733
O15143_K367	ARPC1B	SLESALK*DLK	ARC1B_HUMAN Actin-related protein 2/3 complex subunit 1B OS=Homo sapiens OX=9606 GN=ARPC1B PE=1 SV=3	6.25
O15144_K77	ARPC2	ELQAHGADELLK*R	ARPC2_HUMAN Actin-related protein 2/3 complex subunit 2 OS=Homo sapiens OX=9606 GN=ARPC2 PE=1 SV=1	6.5625
O15145_K29	ARPC3	SQFK*GPAPR	ARPC3_HUMAN Actin-related protein 2/3 complex subunit 3 OS=Homo sapiens OX=9606 GN=ARPC3 PE=1 SV=3	7.31416
O15173_K193	PGRMC2	EK*YDYVGR	PGRC2_HUMAN Membrane-associated progesterone receptor component 2 OS=Homo sapiens OX=9606 GN=PGRMC2 PE=1 SV=1	0.764933
O15212_K122	PFDN6	AQAAK*AGAPGK	PFD6_HUMAN Prefoldin subunit 6 OS=Homo sapiens OX=9606 GN=PFDN6 PE=1 SV=1	6.78191
O15260_K139	SURF4	SEGK*SMFAGVPTMR	SURF4_HUMAN Surfeit locus protein 4 OS=Homo sapiens OX=9606 GN=SURF4 PE=1 SV=3	6.91964
O15260_K22	SURF4	VTK*QYLPHVAR	SURF4_HUMAN Surfeit locus protein 4 OS=Homo sapiens OX=9606 GN=SURF4 PE=1 SV=3	0.877167
O15294_K908	OGT	IIFSPVAPK*EEHVR	OGT1_HUMAN UDP-N-acetylglucosamine--peptide N-acetylglucosaminyltransferase 110 kDa subunit OS=Homo sapiens OX=9606 GN=OGT PE=1 SV=3	10
O15296_K175	ALOX15B	TVEDLELNIK*	LX15B_HUMAN Polyunsaturated fatty acid lipoxygenase ALOX15B OS=Homo sapiens OX=9606 GN=ALOX15B PE=1 SV=3	0.44444
O15355_K166	PPM1G	YGQNCHK*GPPHSK	PPM1G_HUMAN Protein phosphatase 1G OS=Homo sapiens OX=9606 GN=PPM1G PE=1 SV=1	1.28205
O15355_K406	PPM1G	AIGDHFYK*R	PPM1G_HUMAN Protein phosphatase 1G OS=Homo sapiens OX=9606 GN=PPM1G PE=1 SV=1	10
O15371_K215	EIF3D	SEK*PLR	EIF3D_HUMAN Eukaryotic translation initiation factor 3 subunit D OS=Homo sapiens OX=9606 GN=EIF3D PE=1 SV=1	2.50746
O15371_K275	EIF3D	VGSK*LFFDK	EIF3D_HUMAN Eukaryotic translation initiation factor 3 subunit D OS=Homo sapiens OX=9606 GN=EIF3D PE=1 SV=1	3.05474
O15371_K458	EIF3D	YHVK*DSSR	EIF3D_HUMAN Eukaryotic translation initiation factor 3 subunit D OS=Homo sapiens OX=9606 GN=EIF3D PE=1 SV=1	3.23938
O15372_K269	EIF3H	NTSK*QQQQK	EIF3H_HUMAN Eukaryotic translation initiation factor 3 subunit H OS=Homo sapiens OX=9606 GN=EIF3H PE=1 SV=1	0.70889
O15372_K274	EIF3H	QQQQK*HQYQQR	EIF3H_HUMAN Eukaryotic translation initiation factor 3 subunit H OS=Homo sapiens OX=9606 GN=EIF3H PE=1 SV=1	0.5
O15431_K96	SLC31A1	K*SQVSIR	COPT1_HUMAN High affinity copper uptake protein 1 OS=Homo sapiens OX=9606 GN=SLC31A1 PE=1 SV=1	1.25
O15439_K451	ABCC4	PGELLAVVGPVGAGK*SSLLSAVLGELAPSHGLVSVHGRIAYVSQQPWVFSGTLR	MRP4_HUMAN Multidrug resistance-associated protein 4 OS=Homo sapiens OX=9606 GN=ABCC4 PE=1 SV=3	8.33333
O43143_K143	DHX15	LQLPVWEYK*DR	DHX15_HUMAN Pre-mRNA-splicing factor ATP-dependent RNA helicase DHX15 OS=Homo sapiens OX=9606 GN=DHX15 PE=1 SV=2	0.63553
O43182_K267	ARHGAP6	LDSLGK*EK	RHG06_HUMAN Rho GTPase-activating protein 6 OS=Homo sapiens OX=9606 GN=ARHGAP6 PE=1 SV=3	6.25
O43242_K315	PSMD3	K*APQHTAVGFK	PSMD3_HUMAN 26S proteasome non-ATPase regulatory subunit 3 OS=Homo sapiens OX=9606 GN=PSMD3 PE=1 SV=2	0.2
O43264_K597	ZW10	AQK*GELLER	ZW10_HUMAN Centromere/kinetochore protein zw10 homolog OS=Homo sapiens OX=9606 GN=ZW10 PE=1 SV=3	0.76996
O43390_K300	HNRNPR	GFCFLEYEDHK*SAAQAR	HNRPR_HUMAN Heterogeneous nuclear ribonucleoprotein R OS=Homo sapiens OX=9606 GN=HNRNPR PE=1 SV=1	7.69231
O43395_K495	PRPF3	VLGTEAVQDPTK*VEAHVR	PRPF3_HUMAN U4/U6 small nuclear ribonucleoprotein Prp3 OS=Homo sapiens OX=9606 GN=PRPF3 PE=1 SV=2	5.88235
O43399_K128	TPD52L2	K*TQETLSQAGQK	TPD54_HUMAN Tumor protein D54 OS=Homo sapiens OX=9606 GN=TPD52L2 PE=1 SV=2	1.33547
O43399_K154	TPD52L2	K*LGDMR	TPD54_HUMAN Tumor protein D54 OS=Homo sapiens OX=9606 GN=TPD52L2 PE=1 SV=2	10
O43399_K175	TPD52L2	VGTIK*SK	TPD54_HUMAN Tumor protein D54 OS=Homo sapiens OX=9606 GN=TPD52L2 PE=1 SV=2	1.98442
O43399_K70	TPD52L2	QVLAAK*ER	TPD54_HUMAN Tumor protein D54 OS=Homo sapiens OX=9606 GN=TPD52L2 PE=1 SV=2	1.02039
O43399_K90	TPD52L2	LGLSTLGELK*QNLSR	TPD54_HUMAN Tumor protein D54 OS=Homo sapiens OX=9606 GN=TPD52L2 PE=1 SV=2	10
O43447_K53	PPIH	K*DGVPIGYK	PPIH_HUMAN Peptidyl-prolyl cis-trans isomerase H OS=Homo sapiens OX=9606 GN=PPIH PE=1 SV=1	7.69231
O43615_K237	TIMM44	VFEPNEEALGVVLHK*DSK	TIM44_HUMAN Mitochondrial import inner membrane translocase subunit TIM44 OS=Homo sapiens OX=9606 GN=TIMM44 PE=1 SV=2	0.36364
O43707_K108	ACTN4	VHK*INNVNK	ACTN4_HUMAN Alpha-actinin-4 OS=Homo sapiens OX=9606 GN=ACTN4 PE=1 SV=2	1.7927
O43707_K214	ACTN4	HRPELIEYDK*LR	ACTN4_HUMAN Alpha-actinin-4 OS=Homo sapiens OX=9606 GN=ACTN4 PE=1 SV=2	3.94606	Modified residue	Note=N6-acetyllysine;Ontology_term=ECO:0000250;evidence=ECO:0000250|UniProtKB:P12814
O43707_K323	ACTN4	VPQK*TIQEMQQK	ACTN4_HUMAN Alpha-actinin-4 OS=Homo sapiens OX=9606 GN=ACTN4 PE=1 SV=2	3.2989
O43707_K343	ACTN4	VHK*PPK	ACTN4_HUMAN Alpha-actinin-4 OS=Homo sapiens OX=9606 GN=ACTN4 PE=1 SV=2	0.84034
O43707_K346	ACTN4	VHKPPK*VQEK	ACTN4_HUMAN Alpha-actinin-4 OS=Homo sapiens OX=9606 GN=ACTN4 PE=1 SV=2	0.92593
O43707_K437	ACTN4	EAMLK*HR	ACTN4_HUMAN Alpha-actinin-4 OS=Homo sapiens OX=9606 GN=ACTN4 PE=1 SV=2	1.18331
O43707_K518	ACTN4	EALEK*TEK	ACTN4_HUMAN Alpha-actinin-4 OS=Homo sapiens OX=9606 GN=ACTN4 PE=1 SV=2	2.225
O43707_K535	ACTN4	QLEAIDQLHLEYAK*R	ACTN4_HUMAN Alpha-actinin-4 OS=Homo sapiens OX=9606 GN=ACTN4 PE=1 SV=2	10
O43707_K592	ACTN4	EAILAIHK*EAQR	ACTN4_HUMAN Alpha-actinin-4 OS=Homo sapiens OX=9606 GN=ACTN4 PE=1 SV=2	5.87781	Modified residue	Note=N6-acetyllysine;Ontology_term=ECO:0007744;evidence=ECO:0007744|PubMed:19608861;Dbxref=PMID:19608861
O43707_K632	ACTN4	VQQLVPK*R	ACTN4_HUMAN Alpha-actinin-4 OS=Homo sapiens OX=9606 GN=ACTN4 PE=1 SV=2	1.66457
O43707_K779	ACTN4	ASFNHFDK*DHGGALGPEEFK	ACTN4_HUMAN Alpha-actinin-4 OS=Homo sapiens OX=9606 GN=ACTN4 PE=1 SV=2	10	Modified residue	Note=N6-acetyllysine;Ontology_term=ECO:0000250;evidence=ECO:0000250|UniProtKB:P57780
O43707_K859	ACTN4	VLAGDK*NFITAEELR	ACTN4_HUMAN Alpha-actinin-4 OS=Homo sapiens OX=9606 GN=ACTN4 PE=1 SV=2	10	Modified residue	Note=N6-acetyllysine;Ontology_term=ECO:0000250;evidence=ECO:0000250|UniProtKB:P57780
O43707_K98	ACTN4	LPK*PER	ACTN4_HUMAN Alpha-actinin-4 OS=Homo sapiens OX=9606 GN=ACTN4 PE=1 SV=2	3.13065
O43852_K70	CALU	TFDQLTPEESK*ER	CALU_HUMAN Calumenin OS=Homo sapiens OX=9606 GN=CALU PE=1 SV=2	3.16358
O43852_K75	CALU	LGK*IVSK	CALU_HUMAN Calumenin OS=Homo sapiens OX=9606 GN=CALU PE=1 SV=2	0.88311
O43920_K8	NDUFS5	PFLDIQK*R	NDUS5_HUMAN NADH dehydrogenase [ubiquinone] iron-sulfur protein 5 OS=Homo sapiens OX=9606 GN=NDUFS5 PE=1 SV=3	0.96154
O60220_K86	TIMM8A	LEQTQK*SK	TIM8A_HUMAN Mitochondrial import inner membrane translocase subunit Tim8 A OS=Homo sapiens OX=9606 GN=TIMM8A PE=1 SV=1	0.5102
O60231_K93	DHX16	ALLEK*NR	DHX16_HUMAN Pre-mRNA-splicing factor ATP-dependent RNA helicase DHX16 OS=Homo sapiens OX=9606 GN=DHX16 PE=1 SV=2	5
O60313_K228	OPA1	IDQLQEELLHTQLK*YQR	OPA1_HUMAN Dynamin-like 120 kDa protein, mitochondrial OS=Homo sapiens OX=9606 GN=OPA1 PE=1 SV=3	0.61728	Modified residue	Note=N6-acetyllysine;Ontology_term=ECO:0007744;evidence=ECO:0007744|PubMed:19608861;Dbxref=PMID:19608861
O60488_K89	ACSL4	LFDHAVSK*FGK	ACSL4_HUMAN Long-chain-fatty-acid--CoA ligase 4 OS=Homo sapiens OX=9606 GN=ACSL4 PE=1 SV=2	0.39216
O60506_K221	SYNCRIP	EAAQEAVK*LYNNHEIR	HNRPQ_HUMAN Heterogeneous nuclear ribonucleoprotein Q OS=Homo sapiens OX=9606 GN=SYNCRIP PE=1 SV=2	10	Modified residue	Note=N6-acetyllysine;Ontology_term=ECO:0007744;evidence=ECO:0007744|PubMed:19608861;Dbxref=PMID:19608861
O60506_K297	SYNCRIP	GFCFLEYEDHK*TAAQAR	HNRPQ_HUMAN Heterogeneous nuclear ribonucleoprotein Q OS=Homo sapiens OX=9606 GN=SYNCRIP PE=1 SV=2	10
O60506_K363	SYNCRIP	AFSQFGK*LER	HNRPQ_HUMAN Heterogeneous nuclear ribonucleoprotein Q OS=Homo sapiens OX=9606 GN=SYNCRIP PE=1 SV=2	1.13636	Modified residue	Note=N6-acetyllysine;Ontology_term=ECO:0007744;evidence=ECO:0007744|PubMed:19608861;Dbxref=PMID:19608861
O60551_K116	NMT2	NIDEAAK*HR	NMT2_HUMAN Glycylpeptide N-tetradecanoyltransferase 2 OS=Homo sapiens OX=9606 GN=NMT2 PE=1 SV=1	1.25
O60568_K215	PLOD3	LSLNLDHK*SR	PLOD3_HUMAN Multifunctional procollagen lysine hydroxylase and glycosyltransferase LH3 OS=Homo sapiens OX=9606 GN=PLOD3 PE=1 SV=1	5.75658
O60610_K1046	DIAPH1	FPDELAHVEK*ASR	DIAP1_HUMAN Protein diaphanous homolog 1 OS=Homo sapiens OX=9606 GN=DIAPH1 PE=1 SV=2	2.27273
O60664_K164	PLIN3	GAVQSGVDK*TK	PLIN3_HUMAN Perilipin-3 OS=Homo sapiens OX=9606 GN=PLIN3 PE=1 SV=3	0.985245
O60664_K257	PLIN3	QHAYEHSLGK*LR	PLIN3_HUMAN Perilipin-3 OS=Homo sapiens OX=9606 GN=PLIN3 PE=1 SV=3	2.66559
O60664_K289	PLIN3	QGVDQK*LVEGQEK	PLIN3_HUMAN Perilipin-3 OS=Homo sapiens OX=9606 GN=PLIN3 PE=1 SV=3	1.02041
O60664_K57	PLIN3	IK*TVCDAAEK	PLIN3_HUMAN Perilipin-3 OS=Homo sapiens OX=9606 GN=PLIN3 PE=1 SV=3	0.79365
O60664_K65	PLIN3	TVCDAAEK*GVR	PLIN3_HUMAN Perilipin-3 OS=Homo sapiens OX=9606 GN=PLIN3 PE=1 SV=3	0.97087	Modified residue	Note=N6-acetyllysine;Ontology_term=ECO:0007744;evidence=ECO:0007744|PubMed:19608861;Dbxref=PMID:19608861
O60749_K248	SNX2	TVK*HPTLLQDPDLR	SNX2_HUMAN Sorting nexin-2 OS=Homo sapiens OX=9606 GN=SNX2 PE=1 SV=2	7.14286
O60869_K131	EDF1	AIGLK*LR	EDF1_HUMAN Endothelial differentiation-related factor 1 OS=Homo sapiens OX=9606 GN=EDF1 PE=1 SV=1	10
O60888_K82	CUTA	VAK*EIAR	CUTA_HUMAN Protein CutA OS=Homo sapiens OX=9606 GN=CUTA PE=1 SV=2	2.12781
O75083_K104	WDR1	YEYQPFAGK*IK	WDR1_HUMAN WD repeat-containing protein 1 OS=Homo sapiens OX=9606 GN=WDR1 PE=1 SV=4	1.66667
O75083_K115	WDR1	IKDIAWTEDSK*R	WDR1_HUMAN WD repeat-containing protein 1 OS=Homo sapiens OX=9606 GN=WDR1 PE=1 SV=4	7.14286	Modified residue	Note=N6-acetyllysine;Ontology_term=ECO:0007744;evidence=ECO:0007744|PubMed:19608861;Dbxref=PMID:19608861
O75083_K182	WDR1	FK*FTIGDHSR	WDR1_HUMAN WD repeat-containing protein 1 OS=Homo sapiens OX=9606 GN=WDR1 PE=1 SV=4	9.09091
O75083_K480	WDR1	LYSILGTTLK*DEGK	WDR1_HUMAN WD repeat-containing protein 1 OS=Homo sapiens OX=9606 GN=WDR1 PE=1 SV=4	1.28395	Modified residue	Note=N6-acetyllysine;Ontology_term=ECO:0007744;evidence=ECO:0007744|PubMed:19608861;Dbxref=PMID:19608861
O75083_K569	WDR1	VK*IQDAHR	WDR1_HUMAN WD repeat-containing protein 1 OS=Homo sapiens OX=9606 GN=WDR1 PE=1 SV=4	1.7557
O75083_K6	WDR1	PYEIK*K	WDR1_HUMAN WD repeat-containing protein 1 OS=Homo sapiens OX=9606 GN=WDR1 PE=1 SV=4	8.01282
O75083_K7	WDR1	K*VFASLPQVER	WDR1_HUMAN WD repeat-containing protein 1 OS=Homo sapiens OX=9606 GN=WDR1 PE=1 SV=4	5.27914
O75083_K90	WDR1	IWDTTQK*EHLLK	WDR1_HUMAN WD repeat-containing protein 1 OS=Homo sapiens OX=9606 GN=WDR1 PE=1 SV=4	2.17033
O75083_K95	WDR1	IWDTTQKEHLLK*YEYQPFAGK	WDR1_HUMAN WD repeat-containing protein 1 OS=Homo sapiens OX=9606 GN=WDR1 PE=1 SV=4	1.2218	Modified residue	Note=N6-acetyllysine;Ontology_term=ECO:0007744;evidence=ECO:0007744|PubMed:19608861;Dbxref=PMID:19608861
O75116_K29	ROCK2	K*LEALIR	ROCK2_HUMAN Rho-associated protein kinase 2 OS=Homo sapiens OX=9606 GN=ROCK2 PE=1 SV=4	6.94444
O75131_K533	CPNE3	NPATK*QQK	CPNE3_HUMAN Copine-3 OS=Homo sapiens OX=9606 GN=CPNE3 PE=1 SV=1	0.34014
O75145_K450	PPFIA3	LQLHLK*ER	LIPA3_HUMAN Liprin-alpha-3 OS=Homo sapiens OX=9606 GN=PPFIA3 PE=1 SV=3	5.88235
O75347_K52	TBCA	K*QAEILQESR	TBCA_HUMAN Tubulin-specific chaperone A OS=Homo sapiens OX=9606 GN=TBCA PE=1 SV=3	1.00549
O75347_K86	TBCA	ILENEK*DLEEAEEYKEAR	TBCA_HUMAN Tubulin-specific chaperone A OS=Homo sapiens OX=9606 GN=TBCA PE=1 SV=3	6.66667
O75348_K21	ATP6V1G1	AAEK*VSEAR	VATG1_HUMAN V-type proton ATPase subunit G 1 OS=Homo sapiens OX=9606 GN=ATP6V1G1 PE=1 SV=3	3.21256
O75369_K1005	FLNB	ENSTAK*FIPR	FLNB_HUMAN Filamin-B OS=Homo sapiens OX=9606 GN=FLNB PE=1 SV=2	3.68906
O75369_K1057	FLNB	AHGPGLEGGLVGK*PAEFTIDTK	FLNB_HUMAN Filamin-B OS=Homo sapiens OX=9606 GN=FLNB PE=1 SV=2	1.02041
O75369_K1221	FLNB	VK*VEPAVDTSR	FLNB_HUMAN Filamin-B OS=Homo sapiens OX=9606 GN=FLNB PE=1 SV=2	2.87529
O75369_K1241	FLNB	VFGPGIEGK*DVFR	FLNB_HUMAN Filamin-B OS=Homo sapiens OX=9606 GN=FLNB PE=1 SV=2	4.2389
O75369_K1345	FLNB	EAFTNK*PNVFTVVTR	FLNB_HUMAN Filamin-B OS=Homo sapiens OX=9606 GN=FLNB PE=1 SV=2	10
O75369_K1416	FLNB	VPVK*DVVDPSK	FLNB_HUMAN Filamin-B OS=Homo sapiens OX=9606 GN=FLNB PE=1 SV=2	4.51578
O75369_K1425	FLNB	VK*IAGPGLGSGVR	FLNB_HUMAN Filamin-B OS=Homo sapiens OX=9606 GN=FLNB PE=1 SV=2	5.38493
O75369_K1510	FLNB	VK*VLPTYDASK	FLNB_HUMAN Filamin-B OS=Homo sapiens OX=9606 GN=FLNB PE=1 SV=2	1.16389
O75369_K1757	FLNB	K*GEITGEVHMPSGK	FLNB_HUMAN Filamin-B OS=Homo sapiens OX=9606 GN=FLNB PE=1 SV=2	1.04651
O75369_K1979	FLNB	EVGEHLVSIK*K	FLNB_HUMAN Filamin-B OS=Homo sapiens OX=9606 GN=FLNB PE=1 SV=2	4.35064
O75369_K2088	FLNB	FADEHVPGSPFTVK*ISGEGR	FLNB_HUMAN Filamin-B OS=Homo sapiens OX=9606 GN=FLNB PE=1 SV=2	1.13963
O75369_K2170	FLNB	FVPQEMGVHTVSVK*YR	FLNB_HUMAN Filamin-B OS=Homo sapiens OX=9606 GN=FLNB PE=1 SV=2	5.05013
O75369_K2195	FLNB	GQHVTGSPFQFTVGPLGEGGAHK*VR	FLNB_HUMAN Filamin-B OS=Homo sapiens OX=9606 GN=FLNB PE=1 SV=2	3.73124
O75369_K2372	FLNB	FNGSHVVGSPFK*VR	FLNB_HUMAN Filamin-B OS=Homo sapiens OX=9606 GN=FLNB PE=1 SV=2	7.69231
O75369_K2426	FLNB	AGPGTLSVTIEGPSK*VK	FLNB_HUMAN Filamin-B OS=Homo sapiens OX=9606 GN=FLNB PE=1 SV=2	0.62112
O75369_K2507	FLNB	SSTETCYSAIPK*ASSDASK	FLNB_HUMAN Filamin-B OS=Homo sapiens OX=9606 GN=FLNB PE=1 SV=2	0.833616
O75369_K2514	FLNB	ASSDASK*VTSK	FLNB_HUMAN Filamin-B OS=Homo sapiens OX=9606 GN=FLNB PE=1 SV=2	0.64103
O75369_K2518	FLNB	VTSK*GAGLSK	FLNB_HUMAN Filamin-B OS=Homo sapiens OX=9606 GN=FLNB PE=1 SV=2	0.55386	Modified residue	Note=N6-succinyllysine;Ontology_term=ECO:0000250;evidence=ECO:0000250|UniProtKB:Q80X90
O75369_K409	FLNB	NTVELLVEDK*GNQVYR	FLNB_HUMAN Filamin-B OS=Homo sapiens OX=9606 GN=FLNB PE=1 SV=2	2.65294
O75369_K476	FLNB	ETTDFK*VDTK	FLNB_HUMAN Filamin-B OS=Homo sapiens OX=9606 GN=FLNB PE=1 SV=2	1.44088
O75369_K492	FLNB	AAGSGELGVTMK*GPK	FLNB_HUMAN Filamin-B OS=Homo sapiens OX=9606 GN=FLNB PE=1 SV=2	1.08998
O75369_K495	FLNB	GPK*GLEELVK	FLNB_HUMAN Filamin-B OS=Homo sapiens OX=9606 GN=FLNB PE=1 SV=2	0.76923
O75369_K502	FLNB	GLEELVK*QK	FLNB_HUMAN Filamin-B OS=Homo sapiens OX=9606 GN=FLNB PE=1 SV=2	1.1141
O75369_K551	FLNB	SPFEVQVGPEAGMQK*VR	FLNB_HUMAN Filamin-B OS=Homo sapiens OX=9606 GN=FLNB PE=1 SV=2	1.02043
O75369_K6	FLNB	PVTEK*DLAEDAPWK	FLNB_HUMAN Filamin-B OS=Homo sapiens OX=9606 GN=FLNB PE=1 SV=2	6.25
O75369_K677	FLNB	DAGK*APLK	FLNB_HUMAN Filamin-B OS=Homo sapiens OX=9606 GN=FLNB PE=1 SV=2	0.802255
O75369_K681	FLNB	APLK*IFAQDGEGQR	FLNB_HUMAN Filamin-B OS=Homo sapiens OX=9606 GN=FLNB PE=1 SV=2	0.79833	Modified residue	Note=N6-acetyllysine;Ontology_term=ECO:0007744;evidence=ECO:0007744|PubMed:19608861;Dbxref=PMID:19608861
O75369_K697	FLNB	IDIQMK*NR	FLNB_HUMAN Filamin-B OS=Homo sapiens OX=9606 GN=FLNB PE=1 SV=2	0.996337
O75369_K744	FLNB	VNIGQGSHPQK*VK	FLNB_HUMAN Filamin-B OS=Homo sapiens OX=9606 GN=FLNB PE=1 SV=2	0.788992
O75369_K746	FLNB	VK*VFGPGVER	FLNB_HUMAN Filamin-B OS=Homo sapiens OX=9606 GN=FLNB PE=1 SV=2	0.73529
O75369_K810	FLNB	VLSEDEEDVDFDIIHNANDTFTVK*YVPPAAGR	FLNB_HUMAN Filamin-B OS=Homo sapiens OX=9606 GN=FLNB PE=1 SV=2	6.21884
O75369_K838	FLNB	VK*VDPSHDASK	FLNB_HUMAN Filamin-B OS=Homo sapiens OX=9606 GN=FLNB PE=1 SV=2	1.33333
O75369_K849	FLNB	VK*AEGPGLSK	FLNB_HUMAN Filamin-B OS=Homo sapiens OX=9606 GN=FLNB PE=1 SV=2	1.65074
O75369_K960	FLNB	VEVGK*DQEFTVDTR	FLNB_HUMAN Filamin-B OS=Homo sapiens OX=9606 GN=FLNB PE=1 SV=2	1.04723
O75369_K976	FLNB	GAGGQGK*LDVTILSPSR	FLNB_HUMAN Filamin-B OS=Homo sapiens OX=9606 GN=FLNB PE=1 SV=2	8.33333
O75396_K38	SEC22B	DLQQYQSQAK*QLFR	SC22B_HUMAN Vesicle-trafficking protein SEC22b OS=Homo sapiens OX=9606 GN=SEC22B PE=1 SV=4	1.11763	Modified residue	Note=N6-acetyllysine;Ontology_term=ECO:0007744;evidence=ECO:0007744|PubMed:19608861;Dbxref=PMID:19608861
O75396_K43	SEC22B	K*LNEQSPTR	SC22B_HUMAN Vesicle-trafficking protein SEC22b OS=Homo sapiens OX=9606 GN=SEC22B PE=1 SV=4	0.838617
O75531_K32	BANF1	DFVAEPMGEKPVGSLAGIGEVLGK*K	BAF_HUMAN Barrier-to-autointegration factor OS=Homo sapiens OX=9606 GN=BANF1 PE=1 SV=1	5.55556
O75533_K1025	SF3B1	LTPILK*NR	SF3B1_HUMAN Splicing factor 3B subunit 1 OS=Homo sapiens OX=9606 GN=SF3B1 PE=1 SV=3	0.964757
O75533_K522	SF3B1	QITDK*AR	SF3B1_HUMAN Splicing factor 3B subunit 1 OS=Homo sapiens OX=9606 GN=SF3B1 PE=1 SV=3	7.14286
O75643_K487	SNRNP200	IQSK*LYR	U520_HUMAN U5 small nuclear ribonucleoprotein 200 kDa helicase OS=Homo sapiens OX=9606 GN=SNRNP200 PE=1 SV=2	0.66667
O75643_K944	SNRNP200	SPTLYGISHDDLK*GDPLLDQR	U520_HUMAN U5 small nuclear ribonucleoprotein 200 kDa helicase OS=Homo sapiens OX=9606 GN=SNRNP200 PE=1 SV=2	4.83078
O75694_K1386	NUP155	SLQAK*LER	NU155_HUMAN Nuclear pore complex protein Nup155 OS=Homo sapiens OX=9606 GN=NUP155 PE=1 SV=1	7.14286
O75694_K766	NUP155	K*FHEAQLSEK	NU155_HUMAN Nuclear pore complex protein Nup155 OS=Homo sapiens OX=9606 GN=NUP155 PE=1 SV=1	1.57086
O75822_K117	EIF3J	VLTPEEQLADK*LR	EIF3J_HUMAN Eukaryotic translation initiation factor 3 subunit J OS=Homo sapiens OX=9606 GN=EIF3J PE=1 SV=2	7.14286
O75830_K398	SERPINI2	VTNPDTQEIK*GR	SPI2_HUMAN Serpin I2 OS=Homo sapiens OX=9606 GN=SERPINI2 PE=1 SV=1	0.8
O75844_K470	ZMPSTE24	LQALK*TMK	FACE1_HUMAN CAAX prenyl protease 1 homolog OS=Homo sapiens OX=9606 GN=ZMPSTE24 PE=1 SV=2	0.68027
O75947_K73	ATP5PD	K*FNALK	ATP5H_HUMAN ATP synthase subunit d, mitochondrial OS=Homo sapiens OX=9606 GN=ATP5PD PE=1 SV=3	2.37176
O76003_K234	GLRX3	APK*LEER	GLRX3_HUMAN Glutaredoxin-3 OS=Homo sapiens OX=9606 GN=GLRX3 PE=1 SV=2	0.68027
O94760_K100	DDAH1	K*EVDMMK	DDAH1_HUMAN N(G),N(G)-dimethylarginine dimethylaminohydrolase 1 OS=Homo sapiens OX=9606 GN=DDAH1 PE=1 SV=3	0.70922
O94826_K78	TOMM70	GDASGLK*R	TOM70_HUMAN Mitochondrial import receptor subunit TOM70 OS=Homo sapiens OX=9606 GN=TOMM70 PE=1 SV=1	1.5873
O94880_K704	PHF14	APK*ERK	PHF14_HUMAN PHD finger protein 14 OS=Homo sapiens OX=9606 GN=PHF14 PE=1 SV=2	0.91743
O94925_K311	GLS	YVGK*EPSGLR	GLSK_HUMAN Glutaminase kidney isoform, mitochondrial OS=Homo sapiens OX=9606 GN=GLS PE=1 SV=1	1.57997	Modified residue	Note=N6-acetyllysine;Ontology_term=ECO:0007744;evidence=ECO:0007744|PubMed:19608861;Dbxref=PMID:19608861
O94972_K149	TRIM37	VNEEVAK*LR	TRI37_HUMAN E3 ubiquitin-protein ligase TRIM37 OS=Homo sapiens OX=9606 GN=TRIM37 PE=1 SV=2	0.90909
O95159_K234	ZFPL1	TPGLHGDCDDDK*YR	ZFPL1_HUMAN Zinc finger protein-like 1 OS=Homo sapiens OX=9606 GN=ZFPL1 PE=1 SV=2	1.0629
O95163_K1055	ELP1	TLAGK*LVEQR	ELP1_HUMAN Elongator complex protein 1 OS=Homo sapiens OX=9606 GN=ELP1 PE=1 SV=3	0.9901
O95197_K1022	RTN3	IQAK*LPGIAK	RTN3_HUMAN Reticulon-3 OS=Homo sapiens OX=9606 GN=RTN3 PE=1 SV=2	0.34359
O95197_K905	RTN3	SVIQAVQK*SEEGHPFK	RTN3_HUMAN Reticulon-3 OS=Homo sapiens OX=9606 GN=RTN3 PE=1 SV=2	0.837073
O95218_K59	ZRANB2	TLAEK*SR	ZRAB2_HUMAN Zinc finger Ran-binding domain-containing protein 2 OS=Homo sapiens OX=9606 GN=ZRANB2 PE=1 SV=2	2.46994
O95292_K118	VAPB	EAKPEDLMDSK*LR	VAPB_HUMAN Vesicle-associated membrane protein-associated protein B/C OS=Homo sapiens OX=9606 GN=VAPB PE=1 SV=3	1.0101
O95347_K330	SMC2	NLACEESK*R	SMC2_HUMAN Structural maintenance of chromosomes protein 2 OS=Homo sapiens OX=9606 GN=SMC2 PE=1 SV=2	0.76506
O95372_K190	LYPLA2	FGALTAEK*LR	LYPA2_HUMAN Acyl-protein thioesterase 2 OS=Homo sapiens OX=9606 GN=LYPLA2 PE=1 SV=1	9.25926
O95372_K94	LYPLA2	K*AAENIK	LYPA2_HUMAN Acyl-protein thioesterase 2 OS=Homo sapiens OX=9606 GN=LYPLA2 PE=1 SV=1	3.0303
O95373_K774	IPO7	EVK*TSELR	IPO7_HUMAN Importin-7 OS=Homo sapiens OX=9606 GN=IPO7 PE=1 SV=1	5.88235
O95466_K702	FMNL1	AAQK*APSK	FMNL1_HUMAN Formin-like protein 1 OS=Homo sapiens OX=9606 GN=FMNL1 PE=1 SV=3	0.88496
O95670_K16	ATP6V1G2	LQAEK*R	VATG2_HUMAN V-type proton ATPase subunit G 2 OS=Homo sapiens OX=9606 GN=ATP6V1G2 PE=1 SV=1	5.26316
O95816_K111	BAG2	NPQQQESLK*HATR	BAG2_HUMAN BAG family molecular chaperone regulator 2 OS=Homo sapiens OX=9606 GN=BAG2 PE=1 SV=1	2.18946
O95816_K9	BAG2	INAK*ANEGR	BAG2_HUMAN BAG family molecular chaperone regulator 2 OS=Homo sapiens OX=9606 GN=BAG2 PE=1 SV=1	0.45862
O95861_K49	BPNT1	TCATDLQTK*ADR	BPNT1_HUMAN 3'(2'),5'-bisphosphate nucleotidase 1 OS=Homo sapiens OX=9606 GN=BPNT1 PE=1 SV=1	1.32098
O95996_K1760	APC2	GAASVK*TSGSPR	APCL_HUMAN Adenomatous polyposis coli protein 2 OS=Homo sapiens OX=9606 GN=APC2 PE=1 SV=1	1.19048
O96013_K31	PAK4	VHTGFDQHEQK*FTGLPR	PAK4_HUMAN Serine/threonine-protein kinase PAK 4 OS=Homo sapiens OX=9606 GN=PAK4 PE=1 SV=1	4.25202
P00338_K155	LDHA	ISGFPK*NR	LDHA_HUMAN L-lactate dehydrogenase A chain OS=Homo sapiens OX=9606 GN=LDHA PE=1 SV=2	0.927355
P00338_K222	LDHA	TLHPDLGTDK*DKEQWK	LDHA_HUMAN L-lactate dehydrogenase A chain OS=Homo sapiens OX=9606 GN=LDHA PE=1 SV=2	1.4992
P00338_K224	LDHA	TLHPDLGTDKDK*EQWK	LDHA_HUMAN L-lactate dehydrogenase A chain OS=Homo sapiens OX=9606 GN=LDHA PE=1 SV=2	3.40966	Modified residue	Note=N6-acetyllysine;Ontology_term=ECO:0000250;evidence=ECO:0000250|UniProtKB:P06151
P00338_K228	LDHA	TLHPDLGTDKDKEQWK*EVHK	LDHA_HUMAN L-lactate dehydrogenase A chain OS=Homo sapiens OX=9606 GN=LDHA PE=1 SV=2	2.83592
P00338_K232	LDHA	EVHK*QVVESAYEVIK	LDHA_HUMAN L-lactate dehydrogenase A chain OS=Homo sapiens OX=9606 GN=LDHA PE=1 SV=2	3.49821	Modified residue	Note=N6-acetyllysine;Ontology_term=ECO:0000250;evidence=ECO:0000250|UniProtKB:P06151
P00338_K318	LDHA	K*SADTLWGIQK	LDHA_HUMAN L-lactate dehydrogenase A chain OS=Homo sapiens OX=9606 GN=LDHA PE=1 SV=2	3.64148	Modified residue	Note=N6-acetyllysine%3B alternate;Ontology_term=ECO:0007744;evidence=ECO:0007744|PubMed:19608861;Dbxref=PMID:19608861
P00338_K59	LDHA	LK*GEMMDLQHGSLFLR	LDHA_HUMAN L-lactate dehydrogenase A chain OS=Homo sapiens OX=9606 GN=LDHA PE=1 SV=2	2.92731
P00338_K76	LDHA	TPK*IVSGK	LDHA_HUMAN L-lactate dehydrogenase A chain OS=Homo sapiens OX=9606 GN=LDHA PE=1 SV=2	2.34885
P00338_K81	LDHA	IVSGK*DYNVTANSK	LDHA_HUMAN L-lactate dehydrogenase A chain OS=Homo sapiens OX=9606 GN=LDHA PE=1 SV=2	3.47012	Modified residue	Note=N6-acetyllysine;Ontology_term=ECO:0007744;evidence=ECO:0007744|PubMed:19608861;Dbxref=PMID:19608861
P00367_K503	GLUD1	ISGASEK*DIVHSGLAYTMER	DHE3_HUMAN Glutamate dehydrogenase 1, mitochondrial OS=Homo sapiens OX=9606 GN=GLUD1 PE=1 SV=2	9.09091	Modified residue	Note=N6-acetyllysine%3B alternate;Ontology_term=ECO:0007744;evidence=ECO:0007744|PubMed:19608861;Dbxref=PMID:19608861
P00558_K11	PGK1	LTLDK*LDVK	PGK1_HUMAN Phosphoglycerate kinase 1 OS=Homo sapiens OX=9606 GN=PGK1 PE=1 SV=3	5.73391	Modified residue	Note=N6-acetyllysine;Ontology_term=ECO:0007744;evidence=ECO:0007744|PubMed:19608861;Dbxref=PMID:19608861
P00558_K131	PGK1	FHVEEEGK*GK	PGK1_HUMAN Phosphoglycerate kinase 1 OS=Homo sapiens OX=9606 GN=PGK1 PE=1 SV=3	1.79685	Modified residue	Note=N6-acetyllysine%3B alternate;Ontology_term=ECO:0007744;evidence=ECO:0007744|PubMed:19608861;Dbxref=PMID:19608861
P00558_K133	PGK1	GK*DASGNK	PGK1_HUMAN Phosphoglycerate kinase 1 OS=Homo sapiens OX=9606 GN=PGK1 PE=1 SV=3	0.575228
P00558_K139	PGK1	DASGNK*VK	PGK1_HUMAN Phosphoglycerate kinase 1 OS=Homo sapiens OX=9606 GN=PGK1 PE=1 SV=3	0.785247
P00558_K141	PGK1	VK*AEPAK	PGK1_HUMAN Phosphoglycerate kinase 1 OS=Homo sapiens OX=9606 GN=PGK1 PE=1 SV=3	0.51818
P00558_K146	PGK1	AEPAK*IEAFR	PGK1_HUMAN Phosphoglycerate kinase 1 OS=Homo sapiens OX=9606 GN=PGK1 PE=1 SV=3	4.66567	Modified residue	Note=N6-acetyllysine;Ontology_term=ECO:0007744;evidence=ECO:0007744|PubMed:19608861;Dbxref=PMID:19608861
P00558_K191	PGK1	AGGFLMK*K	PGK1_HUMAN Phosphoglycerate kinase 1 OS=Homo sapiens OX=9606 GN=PGK1 PE=1 SV=3	1.00701	Modified residue	Note=N6-succinyllysine;Ontology_term=ECO:0000250;evidence=ECO:0000250|UniProtKB:P09411
P00558_K267	PGK1	IVK*DLMSK	PGK1_HUMAN Phosphoglycerate kinase 1 OS=Homo sapiens OX=9606 GN=PGK1 PE=1 SV=3	3.64589	Modified residue	Note=N6-acetyllysine;Ontology_term=ECO:0007744;evidence=ECO:0007744|PubMed:19608861;Dbxref=PMID:19608861
P00558_K272	PGK1	DLMSK*AEK	PGK1_HUMAN Phosphoglycerate kinase 1 OS=Homo sapiens OX=9606 GN=PGK1 PE=1 SV=3	6.66667
P00558_K279	PGK1	NGVK*ITLPVDFVTADKFDENAK	PGK1_HUMAN Phosphoglycerate kinase 1 OS=Homo sapiens OX=9606 GN=PGK1 PE=1 SV=3	7.14286
P00558_K323	PGK1	K*YAEAVTR	PGK1_HUMAN Phosphoglycerate kinase 1 OS=Homo sapiens OX=9606 GN=PGK1 PE=1 SV=3	2.69605	Modified residue	Note=N6-(2-hydroxyisobutyryl)lysine;Ontology_term=ECO:0000269;evidence=ECO:0000269|PubMed:29775581;Dbxref=PMID:29775581
P00558_K353	PGK1	GTK*ALMDEVVK	PGK1_HUMAN Phosphoglycerate kinase 1 OS=Homo sapiens OX=9606 GN=PGK1 PE=1 SV=3	3.41214
P00558_K41	PGK1	IK*AAVPSIK	PGK1_HUMAN Phosphoglycerate kinase 1 OS=Homo sapiens OX=9606 GN=PGK1 PE=1 SV=3	5.55556
P00750_K464	PLAT	LK*EAHVR	TPA_HUMAN Tissue-type plasminogen activator OS=Homo sapiens OX=9606 GN=PLAT PE=1 SV=1	1.85185	Site$Disulfide bond	Note=Important for single-chain activity$Ontology_term=ECO:0000250;evidence=ECO:0000250
P02545_K108	LMNA	LQLELSK*VR	LMNA_HUMAN Prelamin-A/C OS=Homo sapiens OX=9606 GN=LMNA PE=1 SV=1	5.79152	Modified residue	Note=N6-acetyllysine;Ontology_term=ECO:0007744;evidence=ECO:0007744|PubMed:19608861;Dbxref=PMID:19608861
P02545_K114	LMNA	VREEFK*ELK	LMNA_HUMAN Prelamin-A/C OS=Homo sapiens OX=9606 GN=LMNA PE=1 SV=1	1.19651
P02545_K123	LMNA	K*EGDLIAAQAR	LMNA_HUMAN Prelamin-A/C OS=Homo sapiens OX=9606 GN=LMNA PE=1 SV=1	1.37287	Modified residue	Note=N6-acetyllysine;Ontology_term=ECO:0000250;evidence=ECO:0000250|UniProtKB:P48678
P02545_K135	LMNA	LK*DLEALLNSK	LMNA_HUMAN Prelamin-A/C OS=Homo sapiens OX=9606 GN=LMNA PE=1 SV=1	5.56586	Modified residue	Note=N6-acetyllysine;Ontology_term=ECO:0000250;evidence=ECO:0000250|UniProtKB:P48678
P02545_K155	LMNA	EAALSTALSEK*R	LMNA_HUMAN Prelamin-A/C OS=Homo sapiens OX=9606 GN=LMNA PE=1 SV=1	7.69231	Modified residue	Note=N6-acetyllysine;Ontology_term=ECO:0000250;evidence=ECO:0000250|UniProtKB:P48678
P02545_K171	LMNA	GQVAK*LEAALGEAK	LMNA_HUMAN Prelamin-A/C OS=Homo sapiens OX=9606 GN=LMNA PE=1 SV=1	3.10364	Modified residue$Cross-link	Note=N6-acetyllysine%3B alternate;Ontology_term=ECO:0000250;evidence=ECO:0000250|UniProtKB:P48678$Note=Glycyl lysine isopeptide (Lys-Gly) (interchain with G-Cter in SUMO2)%3B alternate;Ontology_term=ECO:0007744;evidence=ECO:0007744|PubMed:28112733;Dbxref=PMID:28112733
P02545_K180	LMNA	LEAALGEAK*K	LMNA_HUMAN Prelamin-A/C OS=Homo sapiens OX=9606 GN=LMNA PE=1 SV=1	1.50014
P02545_K201	LMNA	LQTMK*EELDFQK	LMNA_HUMAN Prelamin-A/C OS=Homo sapiens OX=9606 GN=LMNA PE=1 SV=1	1.52621	Modified residue$Cross-link	Note=N6-acetyllysine%3B alternate;Ontology_term=ECO:0000250;evidence=ECO:0000250|UniProtKB:P48678$Note=Glycyl lysine isopeptide (Lys-Gly) (interchain with G-Cter in SUMO)%3B alternate
P02545_K208	LMNA	LQTMKEELDFQK*NIYSEELR	LMNA_HUMAN Prelamin-A/C OS=Homo sapiens OX=9606 GN=LMNA PE=1 SV=1	5.88235	Cross-link	Note=Glycyl lysine isopeptide (Lys-Gly) (interchain with G-Cter in SUMO2);Ontology_term=ECO:0007744,ECO:0007744;evidence=ECO:0007744|PubMed:25218447,ECO:0007744|PubMed:28112733;Dbxref=PMID:25218447,PMID:28112733
P02545_K233	LMNA	LVEIDNGK*QR	LMNA_HUMAN Prelamin-A/C OS=Homo sapiens OX=9606 GN=LMNA PE=1 SV=1	3.1098	Cross-link	Note=Glycyl lysine isopeptide (Lys-Gly) (interchain with G-Cter in SUMO2);Ontology_term=ECO:0007744,ECO:0007744,ECO:0007744,ECO:0007744;evidence=ECO:0007744|PubMed:25114211,ECO:0007744|PubMed:25218447,ECO:0007744|PubMed:25755297,ECO:0007744|PubMed:28112733;Dbxref=PMID:25114211,PMID:25218447,PMID:25755297,PMID:28112733
P02545_K260	LMNA	AQHEDQVEQYK*K	LMNA_HUMAN Prelamin-A/C OS=Homo sapiens OX=9606 GN=LMNA PE=1 SV=1	1.7902	Modified residue$Cross-link	Note=N6-acetyllysine%3B alternate;Ontology_term=ECO:0000250;evidence=ECO:0000250|UniProtKB:P48678$Note=Glycyl lysine isopeptide (Lys-Gly) (interchain with G-Cter in SUMO2)%3B alternate;Ontology_term=ECO:0007744,ECO:0007744;evidence=ECO:0007744|PubMed:25755297,ECO:0007744|PubMed:28112733;Dbxref=PMID:25755297,PMID:28112733
P02545_K270	LMNA	TYSAK*LDNAR	LMNA_HUMAN Prelamin-A/C OS=Homo sapiens OX=9606 GN=LMNA PE=1 SV=1	1.09377	Modified residue$Cross-link	Note=N6-acetyllysine%3B alternate;Ontology_term=ECO:0007744;evidence=ECO:0007744|PubMed:19608861;Dbxref=PMID:19608861$Note=Glycyl lysine isopeptide (Lys-Gly) (interchain with G-Cter in SUMO2)%3B alternate;Ontology_term=ECO:0007744,ECO:0007744;evidence=ECO:0007744|PubMed:25755297,ECO:0007744|PubMed:28112733;Dbxref=PMID:25755297,PMID:28112733
P02545_K316	LMNA	QLAAK*EAK	LMNA_HUMAN Prelamin-A/C OS=Homo sapiens OX=9606 GN=LMNA PE=1 SV=1	0.664936
P02545_K32	LMNA	LQEK*EDLQELNDR	LMNA_HUMAN Prelamin-A/C OS=Homo sapiens OX=9606 GN=LMNA PE=1 SV=1	10	Modified residue$Cross-link	Note=N6-acetyllysine%3B alternate;Ontology_term=ECO:0000250;evidence=ECO:0000250|UniProtKB:P48678$Note=Glycyl lysine isopeptide (Lys-Gly) (interchain with G-Cter in SUMO2)%3B alternate;Ontology_term=ECO:0007744;evidence=ECO:0007744|PubMed:28112733;Dbxref=PMID:28112733
P02545_K341	LMNA	LLAEK*ER	LMNA_HUMAN Prelamin-A/C OS=Homo sapiens OX=9606 GN=LMNA PE=1 SV=1	3.22198
P02545_K417	LMNA	ASSHSSQTQGGGSVTK*K	LMNA_HUMAN Prelamin-A/C OS=Homo sapiens OX=9606 GN=LMNA PE=1 SV=1	0.878348	Cross-link	Note=Glycyl lysine isopeptide (Lys-Gly) (interchain with G-Cter in SUMO2);Ontology_term=ECO:0007744,ECO:0007744,ECO:0007744;evidence=ECO:0007744|PubMed:25218447,ECO:0007744|PubMed:25755297,ECO:0007744|PubMed:28112733;Dbxref=PMID:25218447,PMID:25755297,PMID:28112733
P02545_K420	LMNA	K*LESTESR	LMNA_HUMAN Prelamin-A/C OS=Homo sapiens OX=9606 GN=LMNA PE=1 SV=1	1.8214	Cross-link	Note=Glycyl lysine isopeptide (Lys-Gly) (interchain with G-Cter in SUMO2);Ontology_term=ECO:0007744,ECO:0007744,ECO:0007744,ECO:0007744;evidence=ECO:0007744|PubMed:25218447,ECO:0007744|PubMed:25755297,ECO:0007744|PubMed:25772364,ECO:0007744|PubMed:28112733;Dbxref=PMID:25218447,PMID:25755297,PMID:25772364,PMID:28112733
P02545_K450	LMNA	VAVEEVDEEGK*FVR	LMNA_HUMAN Prelamin-A/C OS=Homo sapiens OX=9606 GN=LMNA PE=1 SV=1	4.27119	Modified residue$Cross-link	Note=N6-acetyllysine%3B alternate;Ontology_term=ECO:0007744;evidence=ECO:0007744|PubMed:19608861;Dbxref=PMID:19608861$Note=Glycyl lysine isopeptide (Lys-Gly) (interchain with G-Cter in SUMO2)%3B alternate;Ontology_term=ECO:0007744;evidence=ECO:0007744|PubMed:28112733;Dbxref=PMID:28112733
P02545_K470	LMNA	SNEDQSMGNWQIK*R	LMNA_HUMAN Prelamin-A/C OS=Homo sapiens OX=9606 GN=LMNA PE=1 SV=1	6.34921	Cross-link	Note=Glycyl lysine isopeptide (Lys-Gly) (interchain with G-Cter in SUMO2);Ontology_term=ECO:0007744;evidence=ECO:0007744|PubMed:28112733;Dbxref=PMID:28112733
P02545_K486	LMNA	FPPK*FTLK	LMNA_HUMAN Prelamin-A/C OS=Homo sapiens OX=9606 GN=LMNA PE=1 SV=1	10	Cross-link	Note=Glycyl lysine isopeptide (Lys-Gly) (interchain with G-Cter in SUMO2);Ontology_term=ECO:0007744;evidence=ECO:0007744|PubMed:28112733;Dbxref=PMID:28112733
P02545_K78	LMNA	EVSGIK*AAYEAELGDAR	LMNA_HUMAN Prelamin-A/C OS=Homo sapiens OX=9606 GN=LMNA PE=1 SV=1	2.68181
P02545_K90	LMNA	K*TLDSVAK	LMNA_HUMAN Prelamin-A/C OS=Homo sapiens OX=9606 GN=LMNA PE=1 SV=1	1.75247
P02545_K97	LMNA	TLDSVAK*ER	LMNA_HUMAN Prelamin-A/C OS=Homo sapiens OX=9606 GN=LMNA PE=1 SV=1	1.8711	Cross-link	Note=Glycyl lysine isopeptide (Lys-Gly) (interchain with G-Cter in SUMO2);Ontology_term=ECO:0007744,ECO:0007744,ECO:0007744;evidence=ECO:0007744|PubMed:25218447,ECO:0007744|PubMed:25772364,ECO:0007744|PubMed:28112733;Dbxref=PMID:25218447,PMID:25772364,PMID:28112733
P02753_K35	RBP4	ENFDK*AR	RET4_HUMAN Retinol-binding protein 4 OS=Homo sapiens OX=9606 GN=RBP4 PE=1 SV=3	0.91743	Disulfide bond	Ontology_term=ECO:0000269;evidence=ECO:0000269|PubMed:2444024;Dbxref=PMID:2444024
P03313_K1890		SIEK*VAK	POLG_CXB3N Genome polyprotein OS=Coxsackievirus B3 (strain Nancy) OX=103903 PE=1 SV=4	1.69492
P04075_K101	ALDOA	SK*GGVVGIK	ALDOA_HUMAN Fructose-bisphosphate aldolase A OS=Homo sapiens OX=9606 GN=ALDOA PE=1 SV=2	1.17647
P04075_K108	ALDOA	GGVVGIK*VDK	ALDOA_HUMAN Fructose-bisphosphate aldolase A OS=Homo sapiens OX=9606 GN=ALDOA PE=1 SV=2	3.51307	Modified residue	Note=N6-acetyllysine;Ontology_term=ECO:0007744;evidence=ECO:0007744|PubMed:19608861;Dbxref=PMID:19608861
P04075_K111	ALDOA	VDK*GVVPLAGTNGETTTQGLDGLSER	ALDOA_HUMAN Fructose-bisphosphate aldolase A OS=Homo sapiens OX=9606 GN=ALDOA PE=1 SV=2	6.11111	Modified residue	Note=N6-acetyllysine%3B alternate;Ontology_term=ECO:0000250;evidence=ECO:0000250|UniProtKB:P09972
P04075_K13	ALDOA	PYQYPALTPEQK*K	ALDOA_HUMAN Fructose-bisphosphate aldolase A OS=Homo sapiens OX=9606 GN=ALDOA PE=1 SV=2	5.88235
P04075_K14	ALDOA	K*ELSDIAHR	ALDOA_HUMAN Fructose-bisphosphate aldolase A OS=Homo sapiens OX=9606 GN=ALDOA PE=1 SV=2	3.03203
P04075_K28	ALDOA	IVAPGK*GILAADESTGSIAK	ALDOA_HUMAN Fructose-bisphosphate aldolase A OS=Homo sapiens OX=9606 GN=ALDOA PE=1 SV=2	7.15397
P04075_K312	ALDOA	ALQASALK*AWGGK	ALDOA_HUMAN Fructose-bisphosphate aldolase A OS=Homo sapiens OX=9606 GN=ALDOA PE=1 SV=2	0.98113	Modified residue	Note=N6-malonyllysine;Ontology_term=ECO:0000269;evidence=ECO:0000269|PubMed:21908771;Dbxref=PMID:21908771
P04075_K322	ALDOA	ENLK*AAQEEYVK	ALDOA_HUMAN Fructose-bisphosphate aldolase A OS=Homo sapiens OX=9606 GN=ALDOA PE=1 SV=2	5.58824
P04075_K330	ALDOA	AAQEEYVK*R	ALDOA_HUMAN Fructose-bisphosphate aldolase A OS=Homo sapiens OX=9606 GN=ALDOA PE=1 SV=2	4.92914	Modified residue	Note=N6-acetyllysine;Ontology_term=ECO:0007744;evidence=ECO:0007744|PubMed:19608861;Dbxref=PMID:19608861
P04075_K42	ALDOA	GILAADESTGSIAK*R	ALDOA_HUMAN Fructose-bisphosphate aldolase A OS=Homo sapiens OX=9606 GN=ALDOA PE=1 SV=2	3.21951	Modified residue$Cross-link	Note=N6-acetyllysine%3B alternate;Ontology_term=ECO:0007744;evidence=ECO:0007744|PubMed:19608861;Dbxref=PMID:19608861$Note=Glycyl lysine isopeptide (Lys-Gly) (interchain with G-Cter in SUMO1)%3B alternate;Ontology_term=ECO:0007744;evidence=ECO:0007744|PubMed:25114211;Dbxref=PMID:25114211
P04080_K30	CSTB	SQLEEK*ENK	CYTB_HUMAN Cystatin-B OS=Homo sapiens OX=9606 GN=CSTB PE=1 SV=2	1.15692
P04080_K91	CSTB	AK*HDELTYF	CYTB_HUMAN Cystatin-B OS=Homo sapiens OX=9606 GN=CSTB PE=1 SV=2	2.68153
P04083_K147	ANXA1	TNK*EIR	ANXA1_HUMAN Annexin A1 OS=Homo sapiens OX=9606 GN=ANXA1 PE=1 SV=2	8.05251
P04083_K166	ANXA1	DLAK*DITSDTSGDFR	ANXA1_HUMAN Annexin A1 OS=Homo sapiens OX=9606 GN=ANXA1 PE=1 SV=2	6.1891
P04083_K185	ANXA1	NALLSLAK*GDR	ANXA1_HUMAN Annexin A1 OS=Homo sapiens OX=9606 GN=ANXA1 PE=1 SV=2	8.10374
P04083_K214	ANXA1	K*GTDVNVFNTILTTR	ANXA1_HUMAN Annexin A1 OS=Homo sapiens OX=9606 GN=ANXA1 PE=1 SV=2	7.69231	Cross-link	Note=Glycyl lysine isopeptide (Lys-Gly) (interchain with G-Cter in SUMO1)%3B alternate;Ontology_term=ECO:0007744;evidence=ECO:0007744|PubMed:25114211;Dbxref=PMID:25114211
P04083_K242	ANXA1	YTK*YSK	ANXA1_HUMAN Annexin A1 OS=Homo sapiens OX=9606 GN=ANXA1 PE=1 SV=2	1.42857
P04083_K257	ANXA1	VLDLELK*GDIEK	ANXA1_HUMAN Annexin A1 OS=Homo sapiens OX=9606 GN=ANXA1 PE=1 SV=2	7.14286	Cross-link	Note=Glycyl lysine isopeptide (Lys-Gly) (interchain with G-Cter in SUMO1);Ontology_term=ECO:0000250;evidence=ECO:0000250|UniProtKB:P10107
P04083_K287	ANXA1	LHQAMK*GVGTR	ANXA1_HUMAN Annexin A1 OS=Homo sapiens OX=9606 GN=ANXA1 PE=1 SV=2	1.21951
P04083_K97	ANXA1	AAYLQETGKPLDETLK*K	ANXA1_HUMAN Annexin A1 OS=Homo sapiens OX=9606 GN=ANXA1 PE=1 SV=2	1.00874	Metal binding	Note=Calcium 2%3B via carbonyl oxygen;Ontology_term=ECO:0000250;evidence=ECO:0000250|UniProtKB:P19619
P04181_K405	OAT	DNGLLAK*PTHGDIIR	OAT_HUMAN Ornithine aminotransferase, mitochondrial OS=Homo sapiens OX=9606 GN=OAT PE=1 SV=1	2.94259	Modified residue	Note=N6-acetyllysine%3B alternate;Ontology_term=ECO:0000250;evidence=ECO:0000250|UniProtKB:P29758
P04406_K117	GAPDH	AGAHLQGGAK*R	G3P_HUMAN Glyceraldehyde-3-phosphate dehydrogenase OS=Homo sapiens OX=9606 GN=GAPDH PE=1 SV=3	1.71789
P04406_K139	GAPDH	VIISAPSADAPMFVMGVNHEK*YDNSLK	G3P_HUMAN Glyceraldehyde-3-phosphate dehydrogenase OS=Homo sapiens OX=9606 GN=GAPDH PE=1 SV=3	1.88679
P04406_K194	GAPDH	TVDGPSGK*LWR	G3P_HUMAN Glyceraldehyde-3-phosphate dehydrogenase OS=Homo sapiens OX=9606 GN=GAPDH PE=1 SV=3	5.80633	Modified residue	Note=N6%2CN6-dimethyllysine%3B alternate;Ontology_term=ECO:0000269;evidence=ECO:0000269|PubMed:18183946;Dbxref=PMID:18183946
P04406_K215	GAPDH	GALQNIIPASTGAAK*AVGK	G3P_HUMAN Glyceraldehyde-3-phosphate dehydrogenase OS=Homo sapiens OX=9606 GN=GAPDH PE=1 SV=3	2.43182	Modified residue	Note=N6%2CN6-dimethyllysine%3B alternate;Ontology_term=ECO:0000269;evidence=ECO:0000269|PubMed:18183946;Dbxref=PMID:18183946
P04406_K219	GAPDH	AVGK*VIPELNGK	G3P_HUMAN Glyceraldehyde-3-phosphate dehydrogenase OS=Homo sapiens OX=9606 GN=GAPDH PE=1 SV=3	2.79384	Modified residue	Note=N6-acetyllysine;Ontology_term=ECO:0007744;evidence=ECO:0007744|PubMed:19608861;Dbxref=PMID:19608861
P04406_K251	GAPDH	LEK*PAKYDDIK	G3P_HUMAN Glyceraldehyde-3-phosphate dehydrogenase OS=Homo sapiens OX=9606 GN=GAPDH PE=1 SV=3	6.83923
P04406_K254	GAPDH	LEKPAK*YDDIK	G3P_HUMAN Glyceraldehyde-3-phosphate dehydrogenase OS=Homo sapiens OX=9606 GN=GAPDH PE=1 SV=3	3.61197	Modified residue	Note=N6-acetyllysine;Ontology_term=ECO:0007744;evidence=ECO:0007744|PubMed:19608861;Dbxref=PMID:19608861
P04406_K260	GAPDH	K*VVKQASEGPLK	G3P_HUMAN Glyceraldehyde-3-phosphate dehydrogenase OS=Homo sapiens OX=9606 GN=GAPDH PE=1 SV=3	1	Modified residue	Note=N6%2CN6-dimethyllysine;Ontology_term=ECO:0000269;evidence=ECO:0000269|PubMed:18183946;Dbxref=PMID:18183946
P04406_K263	GAPDH	VVK*QASEGPLK KVVK*QASEGPLK	G3P_HUMAN Glyceraldehyde-3-phosphate dehydrogenase OS=Homo sapiens OX=9606 GN=GAPDH PE=1 SV=3	2.26676	Modified residue	Note=N6%2CN6-dimethyllysine;Ontology_term=ECO:0000269;evidence=ECO:0000269|PubMed:18183946;Dbxref=PMID:18183946
P04406_K334	GAPDH	VVDLMAHMASK*E	G3P_HUMAN Glyceraldehyde-3-phosphate dehydrogenase OS=Homo sapiens OX=9606 GN=GAPDH PE=1 SV=3	7.31825	Modified residue	Note=N6%2CN6-dimethyllysine;Ontology_term=ECO:0000269;evidence=ECO:0000269|PubMed:18183946;Dbxref=PMID:18183946
P04406_K5	GAPDH	VK*VGVNGFGR	G3P_HUMAN Glyceraldehyde-3-phosphate dehydrogenase OS=Homo sapiens OX=9606 GN=GAPDH PE=1 SV=3	8.33333	Modified residue	Note=N6%2CN6-dimethyllysine;Ontology_term=ECO:0000269;evidence=ECO:0000269|PubMed:18183946;Dbxref=PMID:18183946
P04406_K61	GAPDH	FHGTVK*AENGK	G3P_HUMAN Glyceraldehyde-3-phosphate dehydrogenase OS=Homo sapiens OX=9606 GN=GAPDH PE=1 SV=3	3.24937	Modified residue	Note=N6-acetyllysine;Ontology_term=ECO:0007744;evidence=ECO:0007744|PubMed:19608861;Dbxref=PMID:19608861
P04406_K84	GAPDH	DPSK*IK	G3P_HUMAN Glyceraldehyde-3-phosphate dehydrogenase OS=Homo sapiens OX=9606 GN=GAPDH PE=1 SV=3	2.55457
P04792_K112	HSPB1	VSLDVNHFAPDELTVK*TK	HSPB1_HUMAN Heat shock protein beta-1 OS=Homo sapiens OX=9606 GN=HSPB1 PE=1 SV=2	0.844228
P04792_K123	HSPB1	TKDGVVEITGK*HEER DGVVEITGK*HEER	HSPB1_HUMAN Heat shock protein beta-1 OS=Homo sapiens OX=9606 GN=HSPB1 PE=1 SV=2	0.217887	Modified residue	Note=N6-acetyllysine;Ontology_term=ECO:0007744;evidence=ECO:0007744|PubMed:19608861;Dbxref=PMID:19608861
P04792_K198	HSPB1	AQLGGPEAAK*SDETAAK	HSPB1_HUMAN Heat shock protein beta-1 OS=Homo sapiens OX=9606 GN=HSPB1 PE=1 SV=2	6.4394
P04818_K278	TYMS	PFPK*LR	TYSY_HUMAN Thymidylate synthase OS=Homo sapiens OX=9606 GN=TYMS PE=1 SV=3	10
P04843_K524	RPN1	SLETEHK*ALTSEIALLQSR	RPN1_HUMAN Dolichyl-diphosphooligosaccharide--protein glycosyltransferase subunit 1 OS=Homo sapiens OX=9606 GN=RPN1 PE=1 SV=1	4.17392
P04843_K538	RPN1	LK*TEGSDLCDR	RPN1_HUMAN Dolichyl-diphosphooligosaccharide--protein glycosyltransferase subunit 1 OS=Homo sapiens OX=9606 GN=RPN1 PE=1 SV=1	1.21487	Modified residue$Cross-link	Note=N6-acetyllysine%3B alternate;Ontology_term=ECO:0000250;evidence=ECO:0000250|UniProtKB:Q91YQ5$Note=Glycyl lysine isopeptide (Lys-Gly) (interchain with G-Cter in SUMO2)%3B alternate;Ontology_term=ECO:0007744;evidence=ECO:0007744|PubMed:25114211;Dbxref=PMID:25114211
P04844_K627	RPN2	MLAQQAVK*R	RPN2_HUMAN Dolichyl-diphosphooligosaccharide--protein glycosyltransferase subunit 2 OS=Homo sapiens OX=9606 GN=RPN2 PE=1 SV=3	0.95634
P05023_K212	ATP1A1	IISANGCK*VDNSSLTGESEPQTR	AT1A1_HUMAN Sodium/potassium-transporting ATPase subunit alpha-1 OS=Homo sapiens OX=9606 GN=ATP1A1 PE=1 SV=1	7.69231
P05023_K444	ATP1A1	AVFQANQENLPILK*R	AT1A1_HUMAN Sodium/potassium-transporting ATPase subunit alpha-1 OS=Homo sapiens OX=9606 GN=ATP1A1 PE=1 SV=1	1.56017
P05023_K45	ATP1A1	EVSMDDHK*LSLDELHR	AT1A1_HUMAN Sodium/potassium-transporting ATPase subunit alpha-1 OS=Homo sapiens OX=9606 GN=ATP1A1 PE=1 SV=1	9.11376
P05023_K54	ATP1A1	K*YGTDLSR	AT1A1_HUMAN Sodium/potassium-transporting ATPase subunit alpha-1 OS=Homo sapiens OX=9606 GN=ATP1A1 PE=1 SV=1	6.66667
P05023_K605	ATP1A1	AAVPDAVGK*CR	AT1A1_HUMAN Sodium/potassium-transporting ATPase subunit alpha-1 OS=Homo sapiens OX=9606 GN=ATP1A1 PE=1 SV=1	0.51848
P05023_K661	ATP1A1	DAK*ACVVHGSDLK	AT1A1_HUMAN Sodium/potassium-transporting ATPase subunit alpha-1 OS=Homo sapiens OX=9606 GN=ATP1A1 PE=1 SV=1	2.47276	Modified residue	Note=N6-succinyllysine;Ontology_term=ECO:0000250;evidence=ECO:0000250|UniProtKB:Q8VDN2
P05023_K773	ATP1A1	LIFDNLK*K	AT1A1_HUMAN Sodium/potassium-transporting ATPase subunit alpha-1 OS=Homo sapiens OX=9606 GN=ATP1A1 PE=1 SV=1	0.35275
P05141_K105	SLC25A5	QIFLGGVDK*R	ADT2_HUMAN ADP/ATP translocase 2 OS=Homo sapiens OX=9606 GN=SLC25A5 PE=1 SV=7	0.25707	Modified residue	Note=N6-acetyllysine%3B alternate;Ontology_term=ECO:0007744;evidence=ECO:0007744|PubMed:19608861;Dbxref=PMID:19608861
P05141_K147	SLC25A5	LAADVGK*AGAER	ADT2_HUMAN ADP/ATP translocase 2 OS=Homo sapiens OX=9606 GN=SLC25A5 PE=1 SV=7	0.747867	Modified residue	Note=N6-acetyllysine%3B alternate;Ontology_term=ECO:0000250;evidence=ECO:0000250|UniProtKB:P51881
P05141_K163	SLC25A5	GLGDCLVK*IYK	ADT2_HUMAN ADP/ATP translocase 2 OS=Homo sapiens OX=9606 GN=SLC25A5 PE=1 SV=7	0.36436	Modified residue	Note=N6-acetyllysine;Ontology_term=ECO:0007744;evidence=ECO:0007744|PubMed:19608861;Dbxref=PMID:19608861
P05141_K166	SLC25A5	IYK*SDGIK	ADT2_HUMAN ADP/ATP translocase 2 OS=Homo sapiens OX=9606 GN=SLC25A5 PE=1 SV=7	0.96154	Modified residue	Note=N6-acetyllysine;Ontology_term=ECO:0000250;evidence=ECO:0000250|UniProtKB:P51881
P05198_K141	EIF2S1	TAWVFDDK*YK	IF2A_HUMAN Eukaryotic translation initiation factor 2 subunit 1 OS=Homo sapiens OX=9606 GN=EIF2S1 PE=1 SV=3	3.62524	Modified residue	Note=N6-acetyllysine;Ontology_term=ECO:0007744;evidence=ECO:0007744|PubMed:19608861;Dbxref=PMID:19608861
P05198_K154	EIF2S1	RPGYGAYDAFK*HAVSDPSILDSLDLNEDER	IF2A_HUMAN Eukaryotic translation initiation factor 2 subunit 1 OS=Homo sapiens OX=9606 GN=EIF2S1 PE=1 SV=3	7.07442
P05198_K190	EIF2S1	LTPQAVK*IR	IF2A_HUMAN Eukaryotic translation initiation factor 2 subunit 1 OS=Homo sapiens OX=9606 GN=EIF2S1 PE=1 SV=3	3.05494
P05204_K31	HMGN2	LSAK*PAPPKPEPK	HMGN2_HUMAN Non-histone chromosomal protein HMG-17 OS=Homo sapiens OX=9606 GN=HMGN2 PE=1 SV=3	10
P05204_K36	HMGN2	PAPPK*PEPK	HMGN2_HUMAN Non-histone chromosomal protein HMG-17 OS=Homo sapiens OX=9606 GN=HMGN2 PE=1 SV=3	6.35976
P05204_K59	HMGN2	GK*ADAGK	HMGN2_HUMAN Non-histone chromosomal protein HMG-17 OS=Homo sapiens OX=9606 GN=HMGN2 PE=1 SV=3	0.99383
P05204_K76	HMGN2	EGNNPAENGDAK*TDQAQK	HMGN2_HUMAN Non-histone chromosomal protein HMG-17 OS=Homo sapiens OX=9606 GN=HMGN2 PE=1 SV=3	7.69231
P05204_K82	HMGN2	TDQAQK*AEGAGDAK	HMGN2_HUMAN Non-histone chromosomal protein HMG-17 OS=Homo sapiens OX=9606 GN=HMGN2 PE=1 SV=3	8.25423	Modified residue$Cross-link	Note=N6-acetyllysine%3B alternate;Ontology_term=ECO:0007744;evidence=ECO:0007744|PubMed:19608861;Dbxref=PMID:19608861$Note=Glycyl lysine isopeptide (Lys-Gly) (interchain with G-Cter in SUMO2)%3B alternate;Ontology_term=ECO:0007744;evidence=ECO:0007744|PubMed:25218447;Dbxref=PMID:25218447
P05783_K111	KRT18	RLESK*IR	K1C18_HUMAN Keratin, type I cytoskeletal 18 OS=Homo sapiens OX=9606 GN=KRT18 PE=1 SV=2	4.11583
P05783_K167	KRT18	VK*YETELAMR	K1C18_HUMAN Keratin, type I cytoskeletal 18 OS=Homo sapiens OX=9606 GN=KRT18 PE=1 SV=2	2.89662
P05783_K187	KRT18	K*VIDDTNITR	K1C18_HUMAN Keratin, type I cytoskeletal 18 OS=Homo sapiens OX=9606 GN=KRT18 PE=1 SV=2	1.90441
P05783_K215	KRT18	K*NHEEEVK	K1C18_HUMAN Keratin, type I cytoskeletal 18 OS=Homo sapiens OX=9606 GN=KRT18 PE=1 SV=2	3.7799
P05783_K247	KRT18	SQDLAK*IMADIR	K1C18_HUMAN Keratin, type I cytoskeletal 18 OS=Homo sapiens OX=9606 GN=KRT18 PE=1 SV=2	4.04047	Cross-link	Note=Glycyl lysine isopeptide (Lys-Gly) (interchain with G-Cter in SUMO2);Ontology_term=ECO:0007744;evidence=ECO:0007744|PubMed:28112733;Dbxref=PMID:28112733
P05783_K262	KRT18	K*NREELDK	K1C18_HUMAN Keratin, type I cytoskeletal 18 OS=Homo sapiens OX=9606 GN=KRT18 PE=1 SV=2	5.55556
P05783_K317	KRT18	NLK*ASLENSLR	K1C18_HUMAN Keratin, type I cytoskeletal 18 OS=Homo sapiens OX=9606 GN=KRT18 PE=1 SV=2	4.87177
P05783_K372	KRT18	VK*LEAEIATYR	K1C18_HUMAN Keratin, type I cytoskeletal 18 OS=Homo sapiens OX=9606 GN=KRT18 PE=1 SV=2	1.71293	Cross-link	Note=Glycyl lysine isopeptide (Lys-Gly) (interchain with G-Cter in SUMO2);Ontology_term=ECO:0007744;evidence=ECO:0007744|PubMed:28112733;Dbxref=PMID:28112733
P05783_K407	KRT18	LLEDGEDFNLGDALDSSNSMQTIQK*TTTR	K1C18_HUMAN Keratin, type I cytoskeletal 18 OS=Homo sapiens OX=9606 GN=KRT18 PE=1 SV=2	10
P05783_K417	KRT18	IVDGK*VVSETNDTK	K1C18_HUMAN Keratin, type I cytoskeletal 18 OS=Homo sapiens OX=9606 GN=KRT18 PE=1 SV=2	4.26794	Cross-link	Note=Glycyl lysine isopeptide (Lys-Gly) (interchain with G-Cter in SUMO2);Ontology_term=ECO:0007744;evidence=ECO:0007744|PubMed:28112733;Dbxref=PMID:28112733
P05783_K426	KRT18	VVSETNDTK*VLR	K1C18_HUMAN Keratin, type I cytoskeletal 18 OS=Homo sapiens OX=9606 GN=KRT18 PE=1 SV=2	1.6886	Modified residue$Cross-link	Note=N6-acetyllysine%3B alternate;Ontology_term=ECO:0007744;evidence=ECO:0007744|PubMed:19608861;Dbxref=PMID:19608861$Note=Glycyl lysine isopeptide (Lys-Gly) (interchain with G-Cter in SUMO1)%3B alternate;Ontology_term=ECO:0007744;evidence=ECO:0007744|PubMed:25114211;Dbxref=PMID:25114211
P05787_K11	KRT8	SYK*VSTSGPR	K2C8_HUMAN Keratin, type II cytoskeletal 8 OS=Homo sapiens OX=9606 GN=KRT8 PE=1 SV=7	0.704785	Cross-link	Note=Glycyl lysine isopeptide (Lys-Gly) (interchain with G-Cter in SUMO2);Ontology_term=ECO:0007744;evidence=ECO:0007744|PubMed:28112733;Dbxref=PMID:28112733
P05787_K117	KRT8	FLEQQNK*MLETK	K2C8_HUMAN Keratin, type II cytoskeletal 8 OS=Homo sapiens OX=9606 GN=KRT8 PE=1 SV=7	0.7874
P05787_K122	KRT8	MLETK*WSLLQQQK	K2C8_HUMAN Keratin, type II cytoskeletal 8 OS=Homo sapiens OX=9606 GN=KRT8 PE=1 SV=7	0.89286	Cross-link	Note=Glycyl lysine isopeptide (Lys-Gly) (interchain with G-Cter in SUMO2);Ontology_term=ECO:0007744;evidence=ECO:0007744|PubMed:28112733;Dbxref=PMID:28112733
P05787_K130	KRT8	WSLLQQQK*TAR	K2C8_HUMAN Keratin, type II cytoskeletal 8 OS=Homo sapiens OX=9606 GN=KRT8 PE=1 SV=7	0.57143	Cross-link	Note=Glycyl lysine isopeptide (Lys-Gly) (interchain with G-Cter in SUMO2);Ontology_term=ECO:0007744;evidence=ECO:0007744|PubMed:28112733;Dbxref=PMID:28112733
P05787_K158	KRT8	QLETLGQEK*LK	K2C8_HUMAN Keratin, type II cytoskeletal 8 OS=Homo sapiens OX=9606 GN=KRT8 PE=1 SV=7	1.47945
P05787_K207	KRT8	DVDEAYMNK*VELESR	K2C8_HUMAN Keratin, type II cytoskeletal 8 OS=Homo sapiens OX=9606 GN=KRT8 PE=1 SV=7	5.508	Modified residue	Note=N6-acetyllysine;Ontology_term=ECO:0007744;evidence=ECO:0007744|PubMed:19608861;Dbxref=PMID:19608861
P05787_K285	KRT8	AEAESMYQIK*YEELQSLAGK	K2C8_HUMAN Keratin, type II cytoskeletal 8 OS=Homo sapiens OX=9606 GN=KRT8 PE=1 SV=7	1.21395	Cross-link	Note=Glycyl lysine isopeptide (Lys-Gly) (interchain with G-Cter in SUMO2);Ontology_term=ECO:0007744,ECO:0007744,ECO:0007744;evidence=ECO:0007744|PubMed:25114211,ECO:0007744|PubMed:25218447,ECO:0007744|PubMed:28112733;Dbxref=PMID:25114211,PMID:25218447,PMID:28112733
P05787_K295	KRT8	YEELQSLAGK*HGDDLR	K2C8_HUMAN Keratin, type II cytoskeletal 8 OS=Homo sapiens OX=9606 GN=KRT8 PE=1 SV=7	1.11735	Modified residue$Cross-link	Note=N6-acetyllysine%3B alternate;Ontology_term=ECO:0007744;evidence=ECO:0007744|PubMed:19608861;Dbxref=PMID:19608861$Note=Glycyl lysine isopeptide (Lys-Gly) (interchain with G-Cter in SUMO2)%3B alternate;Ontology_term=ECO:0007744;evidence=ECO:0007744|PubMed:28112733;Dbxref=PMID:28112733
P05787_K304	KRT8	TK*TEISEMNR	K2C8_HUMAN Keratin, type II cytoskeletal 8 OS=Homo sapiens OX=9606 GN=KRT8 PE=1 SV=7	1.89031	Cross-link	Note=Glycyl lysine isopeptide (Lys-Gly) (interchain with G-Cter in SUMO2);Ontology_term=ECO:0007744,ECO:0007744;evidence=ECO:0007744|PubMed:25218447,ECO:0007744|PubMed:28112733;Dbxref=PMID:25218447,PMID:28112733
P05787_K325	KRT8	LQAEIEGLK*GQR	K2C8_HUMAN Keratin, type II cytoskeletal 8 OS=Homo sapiens OX=9606 GN=KRT8 PE=1 SV=7	3.16278	Modified residue$Cross-link	Note=N6-acetyllysine%3B alternate;Ontology_term=ECO:0007744;evidence=ECO:0007744|PubMed:19608861;Dbxref=PMID:19608861$Note=Glycyl lysine isopeptide (Lys-Gly) (interchain with G-Cter in SUMO2)%3B alternate;Ontology_term=ECO:0007744;evidence=ECO:0007744|PubMed:28112733;Dbxref=PMID:28112733
P05787_K347	KRT8	GELAIK*DANAK	K2C8_HUMAN Keratin, type II cytoskeletal 8 OS=Homo sapiens OX=9606 GN=KRT8 PE=1 SV=7	1.94564
P05787_K352	KRT8	DANAK*LSELEAALQR	K2C8_HUMAN Keratin, type II cytoskeletal 8 OS=Homo sapiens OX=9606 GN=KRT8 PE=1 SV=7	6.1641
P05787_K464	KRT8	AVVVK*K	K2C8_HUMAN Keratin, type II cytoskeletal 8 OS=Homo sapiens OX=9606 GN=KRT8 PE=1 SV=7	0.627167
P05787_K8	KRT8	VTQK*SYK	K2C8_HUMAN Keratin, type II cytoskeletal 8 OS=Homo sapiens OX=9606 GN=KRT8 PE=1 SV=7	0.587093
P05787_K92	KRT8	TQEK*EQIK	K2C8_HUMAN Keratin, type II cytoskeletal 8 OS=Homo sapiens OX=9606 GN=KRT8 PE=1 SV=7	0.830918
P06396_K193	GSN	LFQVK*GR	GELS_HUMAN Gelsolin OS=Homo sapiens OX=9606 GN=GSN PE=1 SV=1	8.33333
P06396_K239	GSN	LK*ATQVSK	GELS_HUMAN Gelsolin OS=Homo sapiens OX=9606 GN=GSN PE=1 SV=1	1.18781
P06396_K368	GSN	TASDFITK*MDYPK	GELS_HUMAN Gelsolin OS=Homo sapiens OX=9606 GN=GSN PE=1 SV=1	1.27662
P06493_K143	CDK1	GTIK*LADFGLAR	CDK1_HUMAN Cyclin-dependent kinase 1 OS=Homo sapiens OX=9606 GN=CDK1 PE=1 SV=3	0.86855
P06576_K124	ATP5F1B	GQK*VLDSGAPIK	ATPB_HUMAN ATP synthase subunit beta, mitochondrial OS=Homo sapiens OX=9606 GN=ATP5F1B PE=1 SV=3	7.69231	Modified residue	Note=N6-acetyllysine%3B alternate;Ontology_term=ECO:0000250;evidence=ECO:0000250|UniProtKB:P56480
P06576_K133	ATP5F1B	VLDSGAPIK*IPVGPETLGR	ATPB_HUMAN ATP synthase subunit beta, mitochondrial OS=Homo sapiens OX=9606 GN=ATP5F1B PE=1 SV=3	8.95062	Modified residue	Note=N6-acetyllysine%3B alternate;Ontology_term=ECO:0007744;evidence=ECO:0007744|PubMed:19608861;Dbxref=PMID:19608861
P06576_K159	ATP5F1B	GPIK*TK	ATPB_HUMAN ATP synthase subunit beta, mitochondrial OS=Homo sapiens OX=9606 GN=ATP5F1B PE=1 SV=3	1.52255
P06576_K198	ATP5F1B	VVDLLAPYAK*GGK	ATPB_HUMAN ATP synthase subunit beta, mitochondrial OS=Homo sapiens OX=9606 GN=ATP5F1B PE=1 SV=3	5.88235	Modified residue	Note=N6-acetyllysine;Ontology_term=ECO:0007744;evidence=ECO:0007744|PubMed:19608861;Dbxref=PMID:19608861
P06576_K485	ATP5F1B	LVPLK*ETIK	ATPB_HUMAN ATP synthase subunit beta, mitochondrial OS=Homo sapiens OX=9606 GN=ATP5F1B PE=1 SV=3	3.44818	Modified residue	Note=N6-acetyllysine;Ontology_term=ECO:0000250;evidence=ECO:0000250|UniProtKB:P56480
P06703_K26	S100A6	EGDK*HTLSK	S10A6_HUMAN Protein S100-A6 OS=Homo sapiens OX=9606 GN=S100A6 PE=1 SV=1	0.284983
P06703_K31	S100A6	EGDKHTLSK*K	S10A6_HUMAN Protein S100-A6 OS=Homo sapiens OX=9606 GN=S100A6 PE=1 SV=1	0.303758
P06703_K35	S100A6	KELK*ELIQK	S10A6_HUMAN Protein S100-A6 OS=Homo sapiens OX=9606 GN=S100A6 PE=1 SV=1	0.42237
P06703_K40	S100A6	ELIQK*ELTIGSK	S10A6_HUMAN Protein S100-A6 OS=Homo sapiens OX=9606 GN=S100A6 PE=1 SV=1	0.308495	Modified residue	Note=N6-acetyllysine;Ontology_term=ECO:0007744;evidence=ECO:0007744|PubMed:19608861;Dbxref=PMID:19608861
P06703_K47	S100A6	ELTIGSK*LQDAEIAR	S10A6_HUMAN Protein S100-A6 OS=Homo sapiens OX=9606 GN=S100A6 PE=1 SV=1	0.781225	Modified residue	Note=N6-acetyllysine%3B alternate;Ontology_term=ECO:0000250;evidence=ECO:0000250|UniProtKB:P14069
P06730_K212	EIF4E	SGSTTK*NR	IF4E_HUMAN Eukaryotic translation initiation factor 4E OS=Homo sapiens OX=9606 GN=EIF4E PE=1 SV=2	5
P06733_K193	ENO1	IGAEVYHNLK*NVIK	ENOA_HUMAN Alpha-enolase OS=Homo sapiens OX=9606 GN=ENO1 PE=1 SV=2	4.03528	Modified residue	Note=N6-acetyllysine;Ontology_term=ECO:0007744;evidence=ECO:0007744|PubMed:19608861;Dbxref=PMID:19608861
P06733_K197	ENO1	NVIK*EK	ENOA_HUMAN Alpha-enolase OS=Homo sapiens OX=9606 GN=ENO1 PE=1 SV=2	4.98036
P06733_K202	ENO1	YGK*DATNVGDEGGFAPNILENK	ENOA_HUMAN Alpha-enolase OS=Homo sapiens OX=9606 GN=ENO1 PE=1 SV=2	6.35756	Modified residue$Cross-link	Note=N6-acetyllysine%3B alternate;Ontology_term=ECO:0000250;evidence=ECO:0000250|UniProtKB:P17182$Note=Glycyl lysine isopeptide (Lys-Gly) (interchain with G-Cter in SUMO2)%3B alternate;Ontology_term=ECO:0007744;evidence=ECO:0007744|PubMed:28112733;Dbxref=PMID:28112733
P06733_K228	ENO1	EGLELLK*TAIGK	ENOA_HUMAN Alpha-enolase OS=Homo sapiens OX=9606 GN=ENO1 PE=1 SV=2	10	Modified residue	Note=N6-(2-hydroxyisobutyryl)lysine%3B alternate;Ontology_term=ECO:0000269;evidence=ECO:0000269|PubMed:29775581;Dbxref=PMID:29775581
P06733_K233	ENO1	TAIGK*AGYTDK	ENOA_HUMAN Alpha-enolase OS=Homo sapiens OX=9606 GN=ENO1 PE=1 SV=2	6.17446	Modified residue	Note=N6-acetyllysine%3B alternate;Ontology_term=ECO:0007744;evidence=ECO:0007744|PubMed:19608861;Dbxref=PMID:19608861
P06733_K256	ENO1	SGK*YDLDFK	ENOA_HUMAN Alpha-enolase OS=Homo sapiens OX=9606 GN=ENO1 PE=1 SV=2	9.4057	Modified residue	Note=N6-acetyllysine;Ontology_term=ECO:0007744;evidence=ECO:0007744|PubMed:19608861;Dbxref=PMID:19608861
P06733_K326	ENO1	FTASAGIQVVGDDLTVTNPK*R	ENOA_HUMAN Alpha-enolase OS=Homo sapiens OX=9606 GN=ENO1 PE=1 SV=2	5.71895
P06733_K330	ENO1	IAK*AVNEK	ENOA_HUMAN Alpha-enolase OS=Homo sapiens OX=9606 GN=ENO1 PE=1 SV=2	7.39117
P06733_K420	ENO1	IEEELGSK*AK	ENOA_HUMAN Alpha-enolase OS=Homo sapiens OX=9606 GN=ENO1 PE=1 SV=2	6.79199	Modified residue	Note=N6-acetyllysine%3B alternate;Ontology_term=ECO:0007744;evidence=ECO:0007744|PubMed:19608861;Dbxref=PMID:19608861
P06733_K422	ENO1	AK*FAGR	ENOA_HUMAN Alpha-enolase OS=Homo sapiens OX=9606 GN=ENO1 PE=1 SV=2	10
P06733_K60	ENO1	YMGK*GVSK	ENOA_HUMAN Alpha-enolase OS=Homo sapiens OX=9606 GN=ENO1 PE=1 SV=2	3.66444	Modified residue	Note=N6-acetyllysine%3B alternate;Ontology_term=ECO:0000250;evidence=ECO:0000250|UniProtKB:P17182
P06733_K64	ENO1	GVSK*AVEHINK	ENOA_HUMAN Alpha-enolase OS=Homo sapiens OX=9606 GN=ENO1 PE=1 SV=2	7.63152	Modified residue	Note=N6-acetyllysine;Ontology_term=ECO:0007744;evidence=ECO:0007744|PubMed:19608861;Dbxref=PMID:19608861
P06733_K71	ENO1	AVEHINK*TIAPALVSK	ENOA_HUMAN Alpha-enolase OS=Homo sapiens OX=9606 GN=ENO1 PE=1 SV=2	8.57905	Modified residue	Note=N6-acetyllysine;Ontology_term=ECO:0007744;evidence=ECO:0007744|PubMed:19608861;Dbxref=PMID:19608861
P06733_K80	ENO1	TIAPALVSK*K	ENOA_HUMAN Alpha-enolase OS=Homo sapiens OX=9606 GN=ENO1 PE=1 SV=2	9.13515
P06733_K81	ENO1	K*LNVTEQEK	ENOA_HUMAN Alpha-enolase OS=Homo sapiens OX=9606 GN=ENO1 PE=1 SV=2	1.02041
P06733_K89	ENO1	KLNVTEQEK*IDK	ENOA_HUMAN Alpha-enolase OS=Homo sapiens OX=9606 GN=ENO1 PE=1 SV=2	5.66208	Modified residue	Note=N6-acetyllysine%3B alternate;Ontology_term=ECO:0007744;evidence=ECO:0007744|PubMed:19608861;Dbxref=PMID:19608861
P06733_K92	ENO1	IDK*LMIEMDGTENK	ENOA_HUMAN Alpha-enolase OS=Homo sapiens OX=9606 GN=ENO1 PE=1 SV=2	10	Modified residue	Note=N6-acetyllysine;Ontology_term=ECO:0000250;evidence=ECO:0000250|UniProtKB:P17182
P06744_K34	GPI	LFDANK*DR	G6PI_HUMAN Glucose-6-phosphate isomerase OS=Homo sapiens OX=9606 GN=GPI PE=1 SV=4	1.36986	Modified residue	Note=N6-(2-hydroxyisobutyryl)lysine;Ontology_term=ECO:0000269;evidence=ECO:0000269|PubMed:29775581;Dbxref=PMID:29775581
P06744_K366	GPI	YITK*SGTR	G6PI_HUMAN Glucose-6-phosphate isomerase OS=Homo sapiens OX=9606 GN=GPI PE=1 SV=4	2.24461
P06744_K440	GPI	GK*STEEAR	G6PI_HUMAN Glucose-6-phosphate isomerase OS=Homo sapiens OX=9606 GN=GPI PE=1 SV=4	0.95238
P06744_K447	GPI	K*ELQAAGK	G6PI_HUMAN Glucose-6-phosphate isomerase OS=Homo sapiens OX=9606 GN=GPI PE=1 SV=4	0.910165
P06744_K454	GPI	ELQAAGK*SPEDLER	G6PI_HUMAN Glucose-6-phosphate isomerase OS=Homo sapiens OX=9606 GN=GPI PE=1 SV=4	3.30226	Modified residue	Note=N6-acetyllysine%3B alternate;Ontology_term=ECO:0000250;evidence=ECO:0000250|UniProtKB:P06745
P06748_K141	NPM1	LLSISGK*R	NPM_HUMAN Nucleophosmin OS=Homo sapiens OX=9606 GN=NPM1 PE=1 SV=2	1.65236	Cross-link	Note=Glycyl lysine isopeptide (Lys-Gly) (interchain with G-Cter in SUMO2);Ontology_term=ECO:0007744;evidence=ECO:0007744|PubMed:28112733;Dbxref=PMID:28112733
P06748_K150	NPM1	SAPGGGSK*VPQK	NPM_HUMAN Nucleophosmin OS=Homo sapiens OX=9606 GN=NPM1 PE=1 SV=2	1.16125	Modified residue$Cross-link	Note=N6-acetyllysine%3B alternate;Ontology_term=ECO:0007744,ECO:0007744;evidence=ECO:0007744|PubMed:16916647,ECO:0007744|PubMed:19608861;Dbxref=PMID:16916647,PMID:19608861$Note=Glycyl lysine isopeptide (Lys-Gly) (interchain with G-Cter in SUMO2)%3B alternate;Ontology_term=ECO:0007744;evidence=ECO:0007744|PubMed:28112733;Dbxref=PMID:28112733
P06748_K202	NPM1	DTPAK*NAQK	NPM_HUMAN Nucleophosmin OS=Homo sapiens OX=9606 GN=NPM1 PE=1 SV=2	3.47989
P06748_K206	NPM1	NAQK*SNQNGK	NPM_HUMAN Nucleophosmin OS=Homo sapiens OX=9606 GN=NPM1 PE=1 SV=2	1.26825
P06748_K212	NPM1	SNQNGK*DSKPSSTPR	NPM_HUMAN Nucleophosmin OS=Homo sapiens OX=9606 GN=NPM1 PE=1 SV=2	1.84451	Modified residue	Note=N6-acetyllysine;Ontology_term=ECO:0000269,ECO:0007744;evidence=ECO:0000269|PubMed:16107701,ECO:0007744|PubMed:16916647;Dbxref=PMID:16107701,PMID:16916647
P06748_K215	NPM1	DSK*PSSTPR	NPM_HUMAN Nucleophosmin OS=Homo sapiens OX=9606 GN=NPM1 PE=1 SV=2	7.41758	Cross-link	Note=Glycyl lysine isopeptide (Lys-Gly) (interchain with G-Cter in SUMO2);Ontology_term=ECO:0007744,ECO:0007744;evidence=ECO:0007744|PubMed:25772364,ECO:0007744|PubMed:28112733;Dbxref=PMID:25772364,PMID:28112733
P06748_K223	NPM1	SK*GQESFK	NPM_HUMAN Nucleophosmin OS=Homo sapiens OX=9606 GN=NPM1 PE=1 SV=2	1.51818
P06748_K229	NPM1	GQESFK*K	NPM_HUMAN Nucleophosmin OS=Homo sapiens OX=9606 GN=NPM1 PE=1 SV=2	1.42641	Modified residue	Note=N6-acetyllysine;Ontology_term=ECO:0000269;evidence=ECO:0000269|PubMed:16107701;Dbxref=PMID:16107701
P06748_K236	NPM1	TPK*TPK	NPM_HUMAN Nucleophosmin OS=Homo sapiens OX=9606 GN=NPM1 PE=1 SV=2	0.4043
P06748_K239	NPM1	TPK*GPSSVEDIK	NPM_HUMAN Nucleophosmin OS=Homo sapiens OX=9606 GN=NPM1 PE=1 SV=2	0.339543
P06748_K248	NPM1	GPSSVEDIK*AK	NPM_HUMAN Nucleophosmin OS=Homo sapiens OX=9606 GN=NPM1 PE=1 SV=2	0.800887	Cross-link	Note=Glycyl lysine isopeptide (Lys-Gly) (interchain with G-Cter in SUMO1)%3B alternate;Ontology_term=ECO:0007744;evidence=ECO:0007744|PubMed:25114211;Dbxref=PMID:25114211
P06748_K250	NPM1	AK*MQASIEK	NPM_HUMAN Nucleophosmin OS=Homo sapiens OX=9606 GN=NPM1 PE=1 SV=2	0.843688	Modified residue$Cross-link	Note=N6-acetyllysine%3B alternate;Ontology_term=ECO:0000269;evidence=ECO:0000269|PubMed:16107701;Dbxref=PMID:16107701$Note=Glycyl lysine isopeptide (Lys-Gly) (interchain with G-Cter in SUMO2)%3B alternate;Ontology_term=ECO:0007744,ECO:0007744;evidence=ECO:0007744|PubMed:25218447,ECO:0007744|PubMed:28112733;Dbxref=PMID:25218447,PMID:28112733
P06748_K257	NPM1	MQASIEK*GGSLPK	NPM_HUMAN Nucleophosmin OS=Homo sapiens OX=9606 GN=NPM1 PE=1 SV=2	0.86957	Modified residue$Cross-link	Note=N6-acetyllysine%3B alternate;Ontology_term=ECO:0000269,ECO:0007744;evidence=ECO:0000269|PubMed:16107701,ECO:0007744|PubMed:19608861;Dbxref=PMID:16107701,PMID:19608861$Note=Glycyl lysine isopeptide (Lys-Gly) (interchain with G-Cter in SUMO1)%3B alternate;Ontology_term=ECO:0007744;evidence=ECO:0007744|PubMed:25114211;Dbxref=PMID:25114211
P06748_K267	NPM1	VEAK*FINYVK	NPM_HUMAN Nucleophosmin OS=Homo sapiens OX=9606 GN=NPM1 PE=1 SV=2	1.3896	Modified residue$Cross-link	Note=N6-acetyllysine%3B alternate;Ontology_term=ECO:0007744;evidence=ECO:0007744|PubMed:19608861;Dbxref=PMID:19608861$Note=Glycyl lysine isopeptide (Lys-Gly) (interchain with G-Cter in SUMO1)%3B alternate;Ontology_term=ECO:0007744;evidence=ECO:0007744|PubMed:25114211;Dbxref=PMID:25114211
P06748_K27	NPM1	ADK*DYHFK	NPM_HUMAN Nucleophosmin OS=Homo sapiens OX=9606 GN=NPM1 PE=1 SV=2	0.827473	Cross-link	Note=Glycyl lysine isopeptide (Lys-Gly) (interchain with G-Cter in SUMO2);Ontology_term=ECO:0007744;evidence=ECO:0007744|PubMed:25218447;Dbxref=PMID:25218447
P06748_K32	NPM1	ADKDYHFK*VDNDENEHQLSLR	NPM_HUMAN Nucleophosmin OS=Homo sapiens OX=9606 GN=NPM1 PE=1 SV=2	2.74736	Modified residue$Cross-link	Note=N6-acetyllysine%3B alternate;Ontology_term=ECO:0007744;evidence=ECO:0007744|PubMed:19608861;Dbxref=PMID:19608861$Note=Glycyl lysine isopeptide (Lys-Gly) (interchain with G-Cter in SUMO1)%3B alternate;Ontology_term=ECO:0007744;evidence=ECO:0007744|PubMed:25114211;Dbxref=PMID:25114211
P06753_K137	TPM3	ALK*DEEK	TPM3_HUMAN Tropomyosin alpha-3 chain OS=Homo sapiens OX=9606 GN=TPM3 PE=1 SV=2	1.05821
P06753_K150	TPM3	MEIQEIQLK*EAK	TPM3_HUMAN Tropomyosin alpha-3 chain OS=Homo sapiens OX=9606 GN=TPM3 PE=1 SV=2	0.77519
P06753_K232	TPM3	ILTDK*LK	TPM3_HUMAN Tropomyosin alpha-3 chain OS=Homo sapiens OX=9606 GN=TPM3 PE=1 SV=2	3.08794
P07108_K55	DBI	AK*WDAWNELK	ACBP_HUMAN Acyl-CoA-binding protein OS=Homo sapiens OX=9606 GN=DBI PE=1 SV=2	1.33591	Modified residue	Note=N6-acetyllysine%3B alternate;Ontology_term=ECO:0007744;evidence=ECO:0007744|PubMed:19608861;Dbxref=PMID:19608861
P07195_K156	LDHB	LSGLPK*HR	LDHB_HUMAN L-lactate dehydrogenase B chain OS=Homo sapiens OX=9606 GN=LDHB PE=1 SV=2	1.93925
P07195_K308	LDHB	GLTSVINQK*LK	LDHB_HUMAN L-lactate dehydrogenase B chain OS=Homo sapiens OX=9606 GN=LDHB PE=1 SV=2	6.60536
P07195_K318	LDHB	LKDDEVAQLK*K	LDHB_HUMAN L-lactate dehydrogenase B chain OS=Homo sapiens OX=9606 GN=LDHB PE=1 SV=2	9.77444
P07195_K7	LDHB	EK*LIAPVAEEEATVPNNK	LDHB_HUMAN L-lactate dehydrogenase B chain OS=Homo sapiens OX=9606 GN=LDHB PE=1 SV=2	7.81499	Modified residue	Note=N6-acetyllysine;Ontology_term=ECO:0007744;evidence=ECO:0007744|PubMed:19608861;Dbxref=PMID:19608861
P07195_K82	LDHB	IVADK*DYSVTANSK	LDHB_HUMAN L-lactate dehydrogenase B chain OS=Homo sapiens OX=9606 GN=LDHB PE=1 SV=2	10
P07237_K208	P4HB	K*FDEGR	PDIA1_HUMAN Protein disulfide-isomerase OS=Homo sapiens OX=9606 GN=P4HB PE=1 SV=3	7.69231
P07237_K271	P4HB	SVSDYDGK*LSNFK	PDIA1_HUMAN Protein disulfide-isomerase OS=Homo sapiens OX=9606 GN=P4HB PE=1 SV=3	9.07961	Modified residue	Note=N6-succinyllysine;Ontology_term=ECO:0000250;evidence=ECO:0000250|UniProtKB:P09103
P07237_K276	P4HB	LSNFK*TAAESFK	PDIA1_HUMAN Protein disulfide-isomerase OS=Homo sapiens OX=9606 GN=P4HB PE=1 SV=3	1.36454
P07237_K467	P4HB	TLDGFK*K	PDIA1_HUMAN Protein disulfide-isomerase OS=Homo sapiens OX=9606 GN=P4HB PE=1 SV=3	3.76647
P07237_K71	P4HB	LK*AEGSEIR	PDIA1_HUMAN Protein disulfide-isomerase OS=Homo sapiens OX=9606 GN=P4HB PE=1 SV=3	1.36956
P07237_K81	P4HB	LAK*VDATEESDLAQQYGVR	PDIA1_HUMAN Protein disulfide-isomerase OS=Homo sapiens OX=9606 GN=P4HB PE=1 SV=3	1.97522
P07339_K345	CTSD	LGGK*GYK	CATD_HUMAN Cathepsin D OS=Homo sapiens OX=9606 GN=CTSD PE=1 SV=1	0.62744	Disulfide bond	.
P07339_K357	CTSD	LSPEDYTLK*VSQAGK	CATD_HUMAN Cathepsin D OS=Homo sapiens OX=9606 GN=CTSD PE=1 SV=1	0.69444	Disulfide bond	.
P07355_K10	ANXA2	MSTVHEILCK*LSLEGDHSTPPSAYGSVK	ANXA2_HUMAN Annexin A2 OS=Homo sapiens OX=9606 GN=ANXA2 PE=1 SV=2	4.91497
P07355_K115	ANXA2	TPAQYDASELK*ASMK	ANXA2_HUMAN Annexin A2 OS=Homo sapiens OX=9606 GN=ANXA2 PE=1 SV=2	5.63556
P07355_K148	ANXA2	VYK*EMYK	ANXA2_HUMAN Annexin A2 OS=Homo sapiens OX=9606 GN=ANXA2 PE=1 SV=2	3.69532
P07355_K152	ANXA2	EMYK*TDLEK	ANXA2_HUMAN Annexin A2 OS=Homo sapiens OX=9606 GN=ANXA2 PE=1 SV=2	1.08696	Modified residue	Note=N6-acetyllysine;Ontology_term=ECO:0000250;evidence=ECO:0000250|UniProtKB:P07356
P07355_K157	ANXA2	TDLEK*DIISDTSGDFR	ANXA2_HUMAN Annexin A2 OS=Homo sapiens OX=9606 GN=ANXA2 PE=1 SV=2	3.83219
P07355_K169	ANXA2	K*LMVALAK	ANXA2_HUMAN Annexin A2 OS=Homo sapiens OX=9606 GN=ANXA2 PE=1 SV=2	3.64583
P07355_K176	ANXA2	LMVALAK*GR	ANXA2_HUMAN Annexin A2 OS=Homo sapiens OX=9606 GN=ANXA2 PE=1 SV=2	6.66667
P07355_K204	ANXA2	DLYDAGVK*R	ANXA2_HUMAN Annexin A2 OS=Homo sapiens OX=9606 GN=ANXA2 PE=1 SV=2	5.02616
P07355_K206	ANXA2	K*GTDVPK	ANXA2_HUMAN Annexin A2 OS=Homo sapiens OX=9606 GN=ANXA2 PE=1 SV=2	3.79901
P07355_K227	ANXA2	SVPHLQK*VFDR	ANXA2_HUMAN Annexin A2 OS=Homo sapiens OX=9606 GN=ANXA2 PE=1 SV=2	1.55042	Modified residue	Note=N6-acetyllysine;Ontology_term=ECO:0000250;evidence=ECO:0000250|UniProtKB:P07356
P07355_K233	ANXA2	YK*SYSPYDMLESIR	ANXA2_HUMAN Annexin A2 OS=Homo sapiens OX=9606 GN=ANXA2 PE=1 SV=2	7.62907
P07355_K279	ANXA2	LYDSMK*GK	ANXA2_HUMAN Annexin A2 OS=Homo sapiens OX=9606 GN=ANXA2 PE=1 SV=2	0.906926
P07355_K302	ANXA2	SEVDMLK*IR	ANXA2_HUMAN Annexin A2 OS=Homo sapiens OX=9606 GN=ANXA2 PE=1 SV=2	0.606506
P07355_K47	ANXA2	DALNIETAIK*TK	ANXA2_HUMAN Annexin A2 OS=Homo sapiens OX=9606 GN=ANXA2 PE=1 SV=2	2.69777
P07355_K81	ANXA2	K*ELASALK	ANXA2_HUMAN Annexin A2 OS=Homo sapiens OX=9606 GN=ANXA2 PE=1 SV=2	0.613422
P07437_K297	TUBB	ALTVPELTQQVFDAK*NMMAACDPR	TBB5_HUMAN Tubulin beta chain OS=Homo sapiens OX=9606 GN=TUBB PE=1 SV=2	4.18336
P07437_K58	TUBB	ISVYYNEATGGK*YVPR	TBB5_HUMAN Tubulin beta chain OS=Homo sapiens OX=9606 GN=TUBB PE=1 SV=2	0.848547	Modified residue$Cross-link	Note=N6-acetyllysine%3B alternate;Ontology_term=ECO:0007744;evidence=ECO:0007744|PubMed:19608861;Dbxref=PMID:19608861$Note=Glycyl lysine isopeptide (Lys-Gly) (interchain with G-Cter in ubiquitin)%3B alternate
P07602_K414	PSAP	K*LVGYLDR	SAP_HUMAN Prosaposin OS=Homo sapiens OX=9606 GN=PSAP PE=1 SV=2	0.93103	Disulfide bond	Ontology_term=ECO:0000269;evidence=ECO:0000269|PubMed:10406958;Dbxref=PMID:10406958
P07737_K105	PFN1	STGGAPTFNVTVTK*TDK	PROF1_HUMAN Profilin-1 OS=Homo sapiens OX=9606 GN=PFN1 PE=1 SV=2	0.583618	Modified residue	Note=N6-acetyllysine;Ontology_term=ECO:0007744;evidence=ECO:0007744|PubMed:19608861;Dbxref=PMID:19608861
P07737_K108	PFN1	TDK*TLVLLMGK	PROF1_HUMAN Profilin-1 OS=Homo sapiens OX=9606 GN=PFN1 PE=1 SV=2	1.18714	Modified residue	Note=N6-acetyllysine;Ontology_term=ECO:0007744;evidence=ECO:0007744|PubMed:19608861;Dbxref=PMID:19608861
P07737_K126	PFN1	EGVHGGLINK*K	PROF1_HUMAN Profilin-1 OS=Homo sapiens OX=9606 GN=PFN1 PE=1 SV=2	3.09885
P07737_K127	PFN1	EGVHGGLINKK*	PROF1_HUMAN Profilin-1 OS=Homo sapiens OX=9606 GN=PFN1 PE=1 SV=2	1.63934
P07737_K54	PFN1	TFVNITPAEVGVLVGK*DR	PROF1_HUMAN Profilin-1 OS=Homo sapiens OX=9606 GN=PFN1 PE=1 SV=2	9.66117	Cross-link	Note=Glycyl lysine isopeptide (Lys-Gly) (interchain with G-Cter in SUMO2)%3B alternate;Ontology_term=ECO:0007744;evidence=ECO:0007744|PubMed:28112733;Dbxref=PMID:28112733
P07737_K91	PFN1	TK*STGGAPTFNVTVTK	PROF1_HUMAN Profilin-1 OS=Homo sapiens OX=9606 GN=PFN1 PE=1 SV=2	1.16347
P07814_K1361	EPRS1	FNHWELK*GVPIR	SYEP_HUMAN Bifunctional glutamate/proline--tRNA ligase OS=Homo sapiens OX=9606 GN=EPRS1 PE=1 SV=5	0.969958
P07858_K220	CTSB	ICEPGYSPTYK*QDK	CATB_HUMAN Cathepsin B OS=Homo sapiens OX=9606 GN=CTSB PE=1 SV=3	3.125	Modified residue	Note=N6-acetyllysine;Ontology_term=ECO:0000250;evidence=ECO:0000250|UniProtKB:P10605
P07900_K443	HSP90AA1	FYEQFSK*NIK	HS90A_HUMAN Heat shock protein HSP 90-alpha OS=Homo sapiens OX=9606 GN=HSP90AA1 PE=1 SV=5	2.56377	Modified residue	Note=N6-acetyllysine;Ontology_term=ECO:0007744;evidence=ECO:0007744|PubMed:19608861;Dbxref=PMID:19608861
P07900_K446	HSP90AA1	NIK*LGIHEDSQNR	HS90A_HUMAN Heat shock protein HSP 90-alpha OS=Homo sapiens OX=9606 GN=HSP90AA1 PE=1 SV=5	9.09091
P07900_K458	HSP90AA1	K*LSELLR	HS90A_HUMAN Heat shock protein HSP 90-alpha OS=Homo sapiens OX=9606 GN=HSP90AA1 PE=1 SV=5	3.44514	Modified residue	Note=N6-acetyllysine;Ontology_term=ECO:0007744;evidence=ECO:0007744|PubMed:19608861;Dbxref=PMID:19608861
P07900_K499	HSP90AA1	HIYYITGETK*DQVANSAFVER	HS90A_HUMAN Heat shock protein HSP 90-alpha OS=Homo sapiens OX=9606 GN=HSP90AA1 PE=1 SV=5	5.89597
P07900_K539	HSP90AA1	EFEGK*TLVSVTK	HS90A_HUMAN Heat shock protein HSP 90-alpha OS=Homo sapiens OX=9606 GN=HSP90AA1 PE=1 SV=5	0.98384
P07900_K58	HSP90AA1	ELISNSSDALDK*IR	HS90A_HUMAN Heat shock protein HSP 90-alpha OS=Homo sapiens OX=9606 GN=HSP90AA1 PE=1 SV=5	5.05628	Modified residue	Note=N6-acetyllysine;Ontology_term=ECO:0000250;evidence=ECO:0000250|UniProtKB:P07901
P07900_K632	HSP90AA1	K*HLEINPDHSIIETLR	HS90A_HUMAN Heat shock protein HSP 90-alpha OS=Homo sapiens OX=9606 GN=HSP90AA1 PE=1 SV=5	0.844695
P07900_K657	HSP90AA1	AEADKNDK*SVK	HS90A_HUMAN Heat shock protein HSP 90-alpha OS=Homo sapiens OX=9606 GN=HSP90AA1 PE=1 SV=5	0.85179
P07900_K74	HSP90AA1	LDSGK*ELHINLIPNK	HS90A_HUMAN Heat shock protein HSP 90-alpha OS=Homo sapiens OX=9606 GN=HSP90AA1 PE=1 SV=5	8.98109
P07900_K84	HSP90AA1	ELHINLIPNK*QDR	HS90A_HUMAN Heat shock protein HSP 90-alpha OS=Homo sapiens OX=9606 GN=HSP90AA1 PE=1 SV=5	4.64597	Modified residue	Note=N6-acetyllysine;Ontology_term=ECO:0000250;evidence=ECO:0000250|UniProtKB:P07901
P07910_K176	HNRNPC	SGFNSK*SGQR	HNRPC_HUMAN Heterogeneous nuclear ribonucleoproteins C1/C2 OS=Homo sapiens OX=9606 GN=HNRNPC PE=1 SV=4	5.95086	Modified residue$Cross-link	Note=N6-acetyllysine%3B alternate;Ontology_term=ECO:0000250;evidence=ECO:0000250|UniProtKB:Q9Z204$Note=Glycyl lysine isopeptide (Lys-Gly) (interchain with G-Cter in SUMO2)%3B alternate;Ontology_term=ECO:0007744,ECO:0007744,ECO:0007744;evidence=ECO:0007744|PubMed:25218447,ECO:0007744|PubMed:25755297,ECO:0007744|PubMed:28112733;Dbxref=PMID:25218447,PMID:25755297,PMID:28112733
P07910_K184	HNRNPC	GSSK*SGK	HNRPC_HUMAN Heterogeneous nuclear ribonucleoproteins C1/C2 OS=Homo sapiens OX=9606 GN=HNRNPC PE=1 SV=4	1.57102
P07910_K189	HNRNPC	LK*GDDLQAIK	HNRPC_HUMAN Heterogeneous nuclear ribonucleoproteins C1/C2 OS=Homo sapiens OX=9606 GN=HNRNPC PE=1 SV=4	3.125
P07910_K198	HNRNPC	K*ELTQIK	HNRPC_HUMAN Heterogeneous nuclear ribonucleoproteins C1/C2 OS=Homo sapiens OX=9606 GN=HNRNPC PE=1 SV=4	1.33956
P07910_K206	HNRNPC	QK*VDSLLENLEK	HNRPC_HUMAN Heterogeneous nuclear ribonucleoproteins C1/C2 OS=Homo sapiens OX=9606 GN=HNRNPC PE=1 SV=4	0.96154
P07910_K216	HNRNPC	QKVDSLLENLEK*IEK	HNRPC_HUMAN Heterogeneous nuclear ribonucleoproteins C1/C2 OS=Homo sapiens OX=9606 GN=HNRNPC PE=1 SV=4	1.02567
P07910_K223	HNRNPC	EQSK*QAVEMK	HNRPC_HUMAN Heterogeneous nuclear ribonucleoproteins C1/C2 OS=Homo sapiens OX=9606 GN=HNRNPC PE=1 SV=4	3.42889	Cross-link	Note=Glycyl lysine isopeptide (Lys-Gly) (interchain with G-Cter in SUMO2);Ontology_term=ECO:0007744,ECO:0007744;evidence=ECO:0007744|PubMed:25755297,ECO:0007744|PubMed:28112733;Dbxref=PMID:25755297,PMID:28112733
P07910_K89	HNRNPC	MIAGQVLDINLAAEPK*VNR	HNRPC_HUMAN Heterogeneous nuclear ribonucleoproteins C1/C2 OS=Homo sapiens OX=9606 GN=HNRNPC PE=1 SV=4	6.5126	Cross-link	Note=Glycyl lysine isopeptide (Lys-Gly) (interchain with G-Cter in SUMO2);Ontology_term=ECO:0007744,ECO:0007744;evidence=ECO:0007744|PubMed:25218447,ECO:0007744|PubMed:28112733;Dbxref=PMID:25218447,PMID:28112733
P07996_K430	THBS1	TCHIQECDK*R	TSP1_HUMAN Thrombospondin-1 OS=Homo sapiens OX=9606 GN=THBS1 PE=1 SV=2	1.42857
P08133_K135	ANXA6	TNEQMHQLVAAYK*DAYER	ANXA6_HUMAN Annexin A6 OS=Homo sapiens OX=9606 GN=ANXA6 PE=1 SV=3	7.69231
P08133_K224	ANXA6	TTGK*PIEASIR	ANXA6_HUMAN Annexin A6 OS=Homo sapiens OX=9606 GN=ANXA6 PE=1 SV=3	1.36138
P08133_K354	ANXA6	VELK*GTVR	ANXA6_HUMAN Annexin A6 OS=Homo sapiens OX=9606 GN=ANXA6 PE=1 SV=3	6.16531
P08133_K370	ANXA6	PANDFNPDADAK*ALR	ANXA6_HUMAN Annexin A6 OS=Homo sapiens OX=9606 GN=ANXA6 PE=1 SV=3	4.45933	Modified residue	Note=N6-acetyllysine;Ontology_term=ECO:0007744;evidence=ECO:0007744|PubMed:19608861;Dbxref=PMID:19608861
P08133_K406	ANXA6	QTFK*SHFGR	ANXA6_HUMAN Annexin A6 OS=Homo sapiens OX=9606 GN=ANXA6 PE=1 SV=3	5.83333
P08133_K478	ANXA6	AINEAYK*EDYHK	ANXA6_HUMAN Annexin A6 OS=Homo sapiens OX=9606 GN=ANXA6 PE=1 SV=3	8.41844
P08133_K483	ANXA6	AINEAYKEDYHK*SLEDALSSDTSGHFR	ANXA6_HUMAN Annexin A6 OS=Homo sapiens OX=9606 GN=ANXA6 PE=1 SV=3	7.29167	Modified residue	Note=N6-acetyllysine;Ontology_term=ECO:0007744;evidence=ECO:0007744|PubMed:19608861;Dbxref=PMID:19608861
P08133_K9	ANXA6	PAQGAK*YR	ANXA6_HUMAN Annexin A6 OS=Homo sapiens OX=9606 GN=ANXA6 PE=1 SV=3	0.964233
P08195_K615	SLC3A2	LK*LEPHEGLLLR	4F2_HUMAN 4F2 cell-surface antigen heavy chain OS=Homo sapiens OX=9606 GN=SLC3A2 PE=1 SV=3	8.0303
P08237_K144	PFKM	AGK*ITDEEATK	PFKAM_HUMAN ATP-dependent 6-phosphofructokinase, muscle type OS=Homo sapiens OX=9606 GN=PFKM PE=1 SV=2	0.63694
P08238_K347	HSP90AB1	APFDLFENK*K	HS90B_HUMAN Heat shock protein HSP 90-beta OS=Homo sapiens OX=9606 GN=HSP90AB1 PE=1 SV=4	0.606574
P08238_K435	HSP90AB1	FYEAFSK*NLK	HS90B_HUMAN Heat shock protein HSP 90-beta OS=Homo sapiens OX=9606 GN=HSP90AB1 PE=1 SV=4	1.24338	Modified residue	Note=N6-acetyllysine;Ontology_term=ECO:0007744;evidence=ECO:0007744|PubMed:19608861;Dbxref=PMID:19608861
P08238_K438	HSP90AB1	NLK*LGIHEDSTNR	HS90B_HUMAN Heat shock protein HSP 90-beta OS=Homo sapiens OX=9606 GN=HSP90AB1 PE=1 SV=4	6.69363
P08238_K477	HSP90AB1	MK*ETQK	HS90B_HUMAN Heat shock protein HSP 90-beta OS=Homo sapiens OX=9606 GN=HSP90AB1 PE=1 SV=4	1.51515
P08238_K531	HSP90AB1	EFDGK*SLVSVTK	HS90B_HUMAN Heat shock protein HSP 90-beta OS=Homo sapiens OX=9606 GN=HSP90AB1 PE=1 SV=4	3.38366	Modified residue	Note=N6-methylated lysine%3B alternate;Ontology_term=ECO:0000269;evidence=ECO:0000269|PubMed:24880080;Dbxref=PMID:24880080
P08238_K559	HSP90AB1	AK*FENLCK	HS90B_HUMAN Heat shock protein HSP 90-beta OS=Homo sapiens OX=9606 GN=HSP90AB1 PE=1 SV=4	0.535285
P08238_K568	HSP90AB1	LMK*EILDK	HS90B_HUMAN Heat shock protein HSP 90-beta OS=Homo sapiens OX=9606 GN=HSP90AB1 PE=1 SV=4	0.700575
P08238_K624	HSP90AB1	K*HLEINPDHPIVETLR	HS90B_HUMAN Heat shock protein HSP 90-beta OS=Homo sapiens OX=9606 GN=HSP90AB1 PE=1 SV=4	1.97289	Modified residue	Note=N6-acetyllysine;Ontology_term=ECO:0000250;evidence=ECO:0000250|UniProtKB:P11499
P08238_K649	HSP90AB1	AEADKNDK*AVK	HS90B_HUMAN Heat shock protein HSP 90-beta OS=Homo sapiens OX=9606 GN=HSP90AB1 PE=1 SV=4	0.48385
P08238_K69	HSP90AB1	LDSGK*ELK	HS90B_HUMAN Heat shock protein HSP 90-beta OS=Homo sapiens OX=9606 GN=HSP90AB1 PE=1 SV=4	2.61348
P08397_K27	HMBS	K*SQLAR	HEM3_HUMAN Porphobilinogen deaminase OS=Homo sapiens OX=9606 GN=HMBS PE=1 SV=2	1.02177
P08621_K162	SNRNP70	DMHSAYK*HADGK	RU17_HUMAN U1 small nuclear ribonucleoprotein 70 kDa OS=Homo sapiens OX=9606 GN=SNRNP70 PE=1 SV=2	2.82235
P08621_K27	SNRNP70	DPIPYLPPLEK*LPHEK	RU17_HUMAN U1 small nuclear ribonucleoprotein 70 kDa OS=Homo sapiens OX=9606 GN=SNRNP70 PE=1 SV=2	2.65721
P08670_K104	VIM	TNEK*VELQELNDR	VIME_HUMAN Vimentin OS=Homo sapiens OX=9606 GN=VIM PE=1 SV=4	3.36718	Cross-link	Note=Glycyl lysine isopeptide (Lys-Gly) (interchain with G-Cter in SUMO2);Ontology_term=ECO:0007744;evidence=ECO:0007744|PubMed:28112733;Dbxref=PMID:28112733
P08670_K120	VIM	FANYIDK*VR	VIME_HUMAN Vimentin OS=Homo sapiens OX=9606 GN=VIM PE=1 SV=4	1.34502	Modified residue$Cross-link	Note=N6-acetyllysine%3B alternate;Ontology_term=ECO:0007744;evidence=ECO:0007744|PubMed:19608861;Dbxref=PMID:19608861$Note=Glycyl lysine isopeptide (Lys-Gly) (interchain with G-Cter in SUMO2)%3B alternate;Ontology_term=ECO:0007744;evidence=ECO:0007744|PubMed:28112733;Dbxref=PMID:28112733
P08670_K129	VIM	FLEQQNK*ILLAELEQLK	VIME_HUMAN Vimentin OS=Homo sapiens OX=9606 GN=VIM PE=1 SV=4	1.41858	Modified residue$Cross-link	Note=N6-acetyllysine%3B alternate;Ontology_term=ECO:0000250;evidence=ECO:0000250|UniProtKB:P20152$Note=Glycyl lysine isopeptide (Lys-Gly) (interchain with G-Cter in SUMO2)%3B alternate;Ontology_term=ECO:0007744;evidence=ECO:0007744|PubMed:28112733;Dbxref=PMID:28112733
P08670_K139	VIM	ILLAELEQLK*GQGK	VIME_HUMAN Vimentin OS=Homo sapiens OX=9606 GN=VIM PE=1 SV=4	1.07214	Modified residue$Cross-link	Note=N6-acetyllysine%3B alternate;Ontology_term=ECO:0007744;evidence=ECO:0007744|PubMed:19608861;Dbxref=PMID:19608861$Note=Glycyl lysine isopeptide (Lys-Gly) (interchain with G-Cter in SUMO2)%3B alternate;Ontology_term=ECO:0007744;evidence=ECO:0007744|PubMed:28112733;Dbxref=PMID:28112733
P08670_K143	VIM	GQGK*SR	VIME_HUMAN Vimentin OS=Homo sapiens OX=9606 GN=VIM PE=1 SV=4	0.474157
P08670_K168	VIM	QVDQLTNDK*AR	VIME_HUMAN Vimentin OS=Homo sapiens OX=9606 GN=VIM PE=1 SV=4	3.28183	Modified residue	Note=N6-acetyllysine;Ontology_term=ECO:0000250;evidence=ECO:0000250|UniProtKB:P20152
P08670_K188	VIM	EK*LQEEMLQR	VIME_HUMAN Vimentin OS=Homo sapiens OX=9606 GN=VIM PE=1 SV=4	2.83927	Modified residue	Note=N6-acetyllysine%3B alternate;Ontology_term=ECO:0000250;evidence=ECO:0000250|UniProtKB:P20152
P08670_K223	VIM	K*VESLQEEIAFLK	VIME_HUMAN Vimentin OS=Homo sapiens OX=9606 GN=VIM PE=1 SV=4	3.43563	Modified residue$Cross-link	Note=N6-acetyllysine%3B alternate;Ontology_term=ECO:0000250;evidence=ECO:0000250|UniProtKB:P20152$Note=Glycyl lysine isopeptide (Lys-Gly) (interchain with G-Cter in SUMO2)%3B alternate;Ontology_term=ECO:0007744;evidence=ECO:0007744|PubMed:28112733;Dbxref=PMID:28112733
P08670_K235	VIM	VESLQEEIAFLK*K KVESLQEEIAFLK*K	VIME_HUMAN Vimentin OS=Homo sapiens OX=9606 GN=VIM PE=1 SV=4	2.36273	Modified residue	Note=N6-acetyllysine;Ontology_term=ECO:0000250;evidence=ECO:0000250|UniProtKB:P20152
P08670_K236	VIM	KVESLQEEIAFLKK*	VIME_HUMAN Vimentin OS=Homo sapiens OX=9606 GN=VIM PE=1 SV=4	1.49254
P08670_K282	VIM	QQYESVAAK*NLQEAEEWYK	VIME_HUMAN Vimentin OS=Homo sapiens OX=9606 GN=VIM PE=1 SV=4	4.02779
P08670_K292	VIM	NLQEAEEWYK*SK	VIME_HUMAN Vimentin OS=Homo sapiens OX=9606 GN=VIM PE=1 SV=4	1.01502
P08670_K294	VIM	SK*FADLSEAANR	VIME_HUMAN Vimentin OS=Homo sapiens OX=9606 GN=VIM PE=1 SV=4	2.20916	Modified residue$Cross-link	Note=N6-acetyllysine%3B alternate;Ontology_term=ECO:0000250;evidence=ECO:0000250|UniProtKB:P20152$Note=Glycyl lysine isopeptide (Lys-Gly) (interchain with G-Cter in SUMO2)%3B alternate;Ontology_term=ECO:0007744;evidence=ECO:0007744|PubMed:28112733;Dbxref=PMID:28112733
P08670_K313	VIM	QAK*QESTEYR	VIME_HUMAN Vimentin OS=Homo sapiens OX=9606 GN=VIM PE=1 SV=4	2.68752	Cross-link	Note=Glycyl lysine isopeptide (Lys-Gly) (interchain with G-Cter in SUMO2);Ontology_term=ECO:0007744;evidence=ECO:0007744|PubMed:28112733;Dbxref=PMID:28112733
P08670_K334	VIM	QVQSLTCEVDALK*GTNESLER	VIME_HUMAN Vimentin OS=Homo sapiens OX=9606 GN=VIM PE=1 SV=4	4.48094
P08670_K373	VIM	LQDEIQNMK*EEMAR	VIME_HUMAN Vimentin OS=Homo sapiens OX=9606 GN=VIM PE=1 SV=4	5.86135	Modified residue$Cross-link	Note=N6-acetyllysine%3B alternate;Ontology_term=ECO:0007744;evidence=ECO:0007744|PubMed:19608861;Dbxref=PMID:19608861$Note=Glycyl lysine isopeptide (Lys-Gly) (interchain with G-Cter in SUMO2)%3B alternate;Ontology_term=ECO:0007744;evidence=ECO:0007744|PubMed:28112733;Dbxref=PMID:28112733
P08670_K439	VIM	ETNLDSLPLVDTHSK*R	VIME_HUMAN Vimentin OS=Homo sapiens OX=9606 GN=VIM PE=1 SV=4	3.70026	Cross-link	Note=Glycyl lysine isopeptide (Lys-Gly) (interchain with G-Cter in SUMO2);Ontology_term=ECO:0007744;evidence=ECO:0007744|PubMed:28112733;Dbxref=PMID:28112733
P08670_K445	VIM	TLLIK*TVETR	VIME_HUMAN Vimentin OS=Homo sapiens OX=9606 GN=VIM PE=1 SV=4	9.34575	Modified residue$Cross-link	Note=N6-acetyllysine%3B alternate;Ontology_term=ECO:0007744;evidence=ECO:0007744|PubMed:19608861;Dbxref=PMID:19608861$Note=Glycyl lysine isopeptide (Lys-Gly) (interchain with G-Cter in SUMO1)%3B alternate;Ontology_term=ECO:0007744;evidence=ECO:0007744|PubMed:25114211;Dbxref=PMID:25114211
P08670_K97	VIM	LLQDSVDFSLADAINTEFK*NTR	VIME_HUMAN Vimentin OS=Homo sapiens OX=9606 GN=VIM PE=1 SV=4	10
P08708_K32	RPS17	LGNDFHTNK*R	RS17_HUMAN 40S ribosomal protein S17 OS=Homo sapiens OX=9606 GN=RPS17 PE=1 SV=2	8.42379
P08727_K111	KRT19	ALEAANGELEVK*IR	K1C19_HUMAN Keratin, type I cytoskeletal 19 OS=Homo sapiens OX=9606 GN=KRT19 PE=1 SV=4	7.83674
P08727_K140	KRT19	DK*ILGATIENSR	K1C19_HUMAN Keratin, type I cytoskeletal 19 OS=Homo sapiens OX=9606 GN=KRT19 PE=1 SV=4	10
P08727_K168	KRT19	TK*FETEQALR	K1C19_HUMAN Keratin, type I cytoskeletal 19 OS=Homo sapiens OX=9606 GN=KRT19 PE=1 SV=4	5.21396
P08727_K216	KRT19	K*NHEEEISTLR	K1C19_HUMAN Keratin, type I cytoskeletal 19 OS=Homo sapiens OX=9606 GN=KRT19 PE=1 SV=4	0.749703
P08727_K370	KRT19	LMDIK*SR	K1C19_HUMAN Keratin, type I cytoskeletal 19 OS=Homo sapiens OX=9606 GN=KRT19 PE=1 SV=4	3.45241
P08727_K398	KRT19	SLLEGQEDHYNNLSASK*VL	K1C19_HUMAN Keratin, type I cytoskeletal 19 OS=Homo sapiens OX=9606 GN=KRT19 PE=1 SV=4	5.57275
P08729_K296	KRT7	FETLQAQAGK*HGDDLR	K2C7_HUMAN Keratin, type II cytoskeletal 7 OS=Homo sapiens OX=9606 GN=KRT7 PE=1 SV=5	0.67568	Cross-link	Note=Glycyl lysine isopeptide (Lys-Gly) (interchain with G-Cter in SUMO2);Ontology_term=ECO:0007744;evidence=ECO:0007744|PubMed:28112733;Dbxref=PMID:28112733
P08729_K326	KRT7	LQAEIDNIK*NQR	K2C7_HUMAN Keratin, type II cytoskeletal 7 OS=Homo sapiens OX=9606 GN=KRT7 PE=1 SV=5	7.52914
P08729_K353	KRT7	AK*QEELEAALQR	K2C7_HUMAN Keratin, type II cytoskeletal 7 OS=Homo sapiens OX=9606 GN=KRT7 PE=1 SV=5	4.99263
P08758_K101	ANXA5	HALK*GAGTNEK	ANXA5_HUMAN Annexin A5 OS=Homo sapiens OX=9606 GN=ANXA5 PE=1 SV=2	0.70171	Modified residue	Note=N6-acetyllysine;Ontology_term=ECO:0007744;evidence=ECO:0007744|PubMed:16916647;Dbxref=PMID:16916647
P08758_K97	ANXA5	LYDAYELK*HALK	ANXA5_HUMAN Annexin A5 OS=Homo sapiens OX=9606 GN=ANXA5 PE=1 SV=2	1.42199	Modified residue	Note=N6-acetyllysine;Ontology_term=ECO:0007744;evidence=ECO:0007744|PubMed:19608861;Dbxref=PMID:19608861
P09104_K256	ENO2	DGK*YDLDFK	ENOG_HUMAN Gamma-enolase OS=Homo sapiens OX=9606 GN=ENO2 PE=1 SV=3	10	Modified residue	Note=N6-acetyllysine;Ontology_term=ECO:0000250;evidence=ECO:0000250|UniProtKB:P06733
P09211_K128	GSTP1	ALPGQLK*PFETLLSQNQGGK	GSTP1_HUMAN Glutathione S-transferase P OS=Homo sapiens OX=9606 GN=GSTP1 PE=1 SV=2	9.09091	Modified residue	Note=N6-acetyllysine;Ontology_term=ECO:0007744;evidence=ECO:0007744|PubMed:19608861;Dbxref=PMID:19608861
P09234_K22	SNRPC	K*THCSGR	RU1C_HUMAN U1 small nuclear ribonucleoprotein C OS=Homo sapiens OX=9606 GN=SNRPC PE=1 SV=1	1.47059
P09382_K128	LGALS1	LNLEAINYMAADGDFK*IK	LEG1_HUMAN Galectin-1 OS=Homo sapiens OX=9606 GN=LGALS1 PE=1 SV=2	0.897435	Modified residue	Note=N6-acetyllysine;Ontology_term=ECO:0000250;evidence=ECO:0000250|UniProtKB:P16045
P09382_K29	LGALS1	GEVAPDAK*SFVLNLGK	LEG1_HUMAN Galectin-1 OS=Homo sapiens OX=9606 GN=LGALS1 PE=1 SV=2	5.8685	Modified residue	Note=N6-acetyllysine;Ontology_term=ECO:0007744;evidence=ECO:0007744|PubMed:19608861;Dbxref=PMID:19608861
P09382_K64	LGALS1	FNAHGDANTIVCNSK*DGGAWGTEQR	LEG1_HUMAN Galectin-1 OS=Homo sapiens OX=9606 GN=LGALS1 PE=1 SV=2	8.35242
P09429_K165	HMGB1	AK*GKPDAAK	HMGB1_HUMAN High mobility group protein B1 OS=Homo sapiens OX=9606 GN=HMGB1 PE=1 SV=3	1.33309
P09429_K30	HMGB1	K*HPDASVNFSEFSK	HMGB1_HUMAN High mobility group protein B1 OS=Homo sapiens OX=9606 GN=HMGB1 PE=1 SV=3	0.633145	DNA binding$Modified residue$Disulfide bond	Note=HMG box 1;Ontology_term=ECO:0000255;evidence=ECO:0000255|PROSITE-ProRule:PRU00267$Note=N6-acetyllysine;Ontology_term=ECO:0007744;evidence=ECO:0007744|PubMed:19608861;Dbxref=PMID:19608861$Note=In disulfide HMGB1%3B alternate;Ontology_term=ECO:0000250;evidence=ECO:0000250|UniProtKB:P63159
P09429_K59	HMGB1	GK*FEDMAK	HMGB1_HUMAN High mobility group protein B1 OS=Homo sapiens OX=9606 GN=HMGB1 PE=1 SV=3	2.33062	DNA binding	Note=HMG box 1;Ontology_term=ECO:0000255;evidence=ECO:0000255|PROSITE-ProRule:PRU00267
P09429_K90	HMGB1	FK*DPNAPK	HMGB1_HUMAN High mobility group protein B1 OS=Homo sapiens OX=9606 GN=HMGB1 PE=1 SV=3	0.7874	Modified residue	Note=N6-acetyllysine;Ontology_term=ECO:0000250;evidence=ECO:0000250|UniProtKB:P63158
P09496_K136	CLTA	KQEAEWK*EK	CLCA_HUMAN Clathrin light chain A OS=Homo sapiens OX=9606 GN=CLTA PE=1 SV=1	0.62893
P09496_K229	CLTA	QAK*DVSR	CLCA_HUMAN Clathrin light chain A OS=Homo sapiens OX=9606 GN=CLTA PE=1 SV=1	0.27208
P09496_K242	CLTA	SVLISLK*QAPLVH	CLCA_HUMAN Clathrin light chain A OS=Homo sapiens OX=9606 GN=CLTA PE=1 SV=1	1.11111	Modified residue	Note=N6-acetyllysine;Ontology_term=ECO:0000250;evidence=ECO:0000250|UniProtKB:O08585
P09497_K207	CLTB	SSK*QCK	CLCB_HUMAN Clathrin light chain B OS=Homo sapiens OX=9606 GN=CLTB PE=1 SV=1	0.125	Disulfide bond	Ontology_term=ECO:0000250;evidence=ECO:0000250
P09543_K162	CNP	LDCAQLK*EK	CN37_HUMAN 2',3'-cyclic-nucleotide 3'-phosphodiesterase OS=Homo sapiens OX=9606 GN=CNP PE=1 SV=2	4.24578
P09543_K164	CNP	LDCAQLKEK*	CN37_HUMAN 2',3'-cyclic-nucleotide 3'-phosphodiesterase OS=Homo sapiens OX=9606 GN=CNP PE=1 SV=2	10
P09543_K63	CNP	GLPGSGK*STLAR	CN37_HUMAN 2',3'-cyclic-nucleotide 3'-phosphodiesterase OS=Homo sapiens OX=9606 GN=CNP PE=1 SV=2	1.16279
P09543_K73	CNP	VIVDK*YR	CN37_HUMAN 2',3'-cyclic-nucleotide 3'-phosphodiesterase OS=Homo sapiens OX=9606 GN=CNP PE=1 SV=2	3.60389
P09651_K350	HNRNPA1	SSGPYGGGGQYFAK*PR	ROA1_HUMAN Heterogeneous nuclear ribonucleoprotein A1 OS=Homo sapiens OX=9606 GN=HNRNPA1 PE=1 SV=5	2.63887	Modified residue$Cross-link	Note=N6-acetyllysine%3B alternate;Ontology_term=ECO:0007744;evidence=ECO:0007744|PubMed:19608861;Dbxref=PMID:19608861$Note=Glycyl lysine isopeptide (Lys-Gly) (interchain with G-Cter in SUMO2)%3B alternate;Ontology_term=ECO:0007744;evidence=ECO:0007744|PubMed:28112733;Dbxref=PMID:28112733
P09651_K52	HNRNPA1	DPNTK*R	ROA1_HUMAN Heterogeneous nuclear ribonucleoprotein A1 OS=Homo sapiens OX=9606 GN=HNRNPA1 PE=1 SV=5	1.81743
P09651_K8	HNRNPA1	SESPK*EPEQLR	ROA1_HUMAN Heterogeneous nuclear ribonucleoprotein A1 OS=Homo sapiens OX=9606 GN=HNRNPA1 PE=1 SV=5	4.24938	Cross-link	Note=Glycyl lysine isopeptide (Lys-Gly) (interchain with G-Cter in SUMO2);Ontology_term=ECO:0007744,ECO:0007744;evidence=ECO:0007744|PubMed:25755297,ECO:0007744|PubMed:28112733;Dbxref=PMID:25755297,PMID:28112733
P09661_K172	SNRPA1	GAQLAK*DIAR	RU2A_HUMAN U2 small nuclear ribonucleoprotein A' OS=Homo sapiens OX=9606 GN=SNRPA1 PE=1 SV=2	7.75884	Modified residue$Cross-link	Note=N6-acetyllysine%3B alternate;Ontology_term=ECO:0007744;evidence=ECO:0007744|PubMed:19608861;Dbxref=PMID:19608861$Note=Glycyl lysine isopeptide (Lys-Gly) (interchain with G-Cter in SUMO2)%3B alternate;Ontology_term=ECO:0007744;evidence=ECO:0007744|PubMed:28112733;Dbxref=PMID:28112733
P09758_K138	TACSTD2	TDK*GDLSLR	TACD2_HUMAN Tumor-associated calcium signal transducer 2 OS=Homo sapiens OX=9606 GN=TACSTD2 PE=1 SV=3	2.8548	Disulfide bond	Ontology_term=ECO:0000255;evidence=ECO:0000255|PROSITE-ProRule:PRU00500
P09758_K231	TACSTD2	DIK*GESLFQGR	TACD2_HUMAN Tumor-associated calcium signal transducer 2 OS=Homo sapiens OX=9606 GN=TACSTD2 PE=1 SV=3	10
P09913_K271	IFIT2	AIELLK*K	IFIT2_HUMAN Interferon-induced protein with tetratricopeptide repeats 2 OS=Homo sapiens OX=9606 GN=IFIT2 PE=1 SV=1	0.48309
P09960_K337	LTA4H	LFGEK*FR	LKHA4_HUMAN Leukotriene A-4 hydrolase OS=Homo sapiens OX=9606 GN=LTA4H PE=1 SV=2	6.25	Modified residue	Note=N6-acetyllysine;Ontology_term=ECO:0007744;evidence=ECO:0007744|PubMed:19608861;Dbxref=PMID:19608861
P09960_K573	LTA4H	PLFK*DLAAFDK	LKHA4_HUMAN Leukotriene A-4 hydrolase OS=Homo sapiens OX=9606 GN=LTA4H PE=1 SV=2	6.25	Modified residue	Note=N6-acetyllysine;Ontology_term=ECO:0007744;evidence=ECO:0007744|PubMed:19608861;Dbxref=PMID:19608861
P0CG22_K15	DHRS4L1	AGK*SVR	DR4L1_HUMAN Putative dehydrogenase/reductase SDR family member 4-like 1 OS=Homo sapiens OX=9606 GN=DHRS4L1 PE=5 SV=1	0.296695
P0DMV9_K246	HSPA1B	LVNHFVEEFK*R	HS71B_HUMAN Heat shock 70 kDa protein 1B OS=Homo sapiens OX=9606 GN=HSPA1B PE=1 SV=1	5.06298	Modified residue	Note=N6-acetyllysine;Ontology_term=ECO:0007744;evidence=ECO:0007744|PubMed:19608861;Dbxref=PMID:19608861
P0DMV9_K328	HSPA1B	LDK*AQIHDLVLVGGSTR	HS71B_HUMAN Heat shock 70 kDa protein 1B OS=Homo sapiens OX=9606 GN=HSPA1B PE=1 SV=1	10
P0DMV9_K595	HSPA1B	DEFEHK*R	HS71B_HUMAN Heat shock 70 kDa protein 1B OS=Homo sapiens OX=9606 GN=HSPA1B PE=1 SV=1	5.21235
P0DMV9_K71	HSPA1B	NQVALNPQNTVFDAK*R	HS71B_HUMAN Heat shock 70 kDa protein 1B OS=Homo sapiens OX=9606 GN=HSPA1B PE=1 SV=1	5.87928
P10412_K140	H1-4	K*ATGAATPK	H14_HUMAN Histone H1.4 OS=Homo sapiens OX=9606 GN=H1-4 PE=1 SV=2	1.61596
P10412_K148	H1-4	ATGAATPK*K	H14_HUMAN Histone H1.4 OS=Homo sapiens OX=9606 GN=H1-4 PE=1 SV=2	10
P10412_K159	H1-4	AK*KPAAAAGAK	H14_HUMAN Histone H1.4 OS=Homo sapiens OX=9606 GN=H1-4 PE=1 SV=2	0.93458
P10412_K160	H1-4	K*PAAAAGAK	H14_HUMAN Histone H1.4 OS=Homo sapiens OX=9606 GN=H1-4 PE=1 SV=2	1.204
P10412_K168	H1-4	KPAAAAGAK*K	H14_HUMAN Histone H1.4 OS=Homo sapiens OX=9606 GN=H1-4 PE=1 SV=2	1.3779
P10412_K26	H1-4	K*SAGAAK	H14_HUMAN Histone H1.4 OS=Homo sapiens OX=9606 GN=H1-4 PE=1 SV=2	1.94079	Modified residue	Note=N6-acetyllysine%3B alternate;Ontology_term=ECO:0000269;evidence=ECO:0000269|PubMed:15469825;Dbxref=PMID:15469825
P10412_K32	H1-4	SAGAAK*R	H14_HUMAN Histone H1.4 OS=Homo sapiens OX=9606 GN=H1-4 PE=1 SV=2	2.90597
P10599_K3	TXN	VK*QIESK	THIO_HUMAN Thioredoxin OS=Homo sapiens OX=9606 GN=TXN PE=1 SV=3	1.08095	Modified residue	Note=N6-acetyllysine;Ontology_term=ECO:0007744;evidence=ECO:0007744|PubMed:19608861;Dbxref=PMID:19608861
P10599_K39	TXN	MIK*PFFHSLSEK	THIO_HUMAN Thioredoxin OS=Homo sapiens OX=9606 GN=TXN PE=1 SV=3	0.2849	Modified residue	Note=N6-acetyllysine;Ontology_term=ECO:0007744;evidence=ECO:0007744|PubMed:19608861;Dbxref=PMID:19608861
P10599_K8	TXN	QIESK*TAFQEALDAAGDK	THIO_HUMAN Thioredoxin OS=Homo sapiens OX=9606 GN=TXN PE=1 SV=3	1.61189	Modified residue	Note=N6-succinyllysine;Ontology_term=ECO:0000250;evidence=ECO:0000250|UniProtKB:P10639
P10599_K94	TXN	VGEFSGANK*EK	THIO_HUMAN Thioredoxin OS=Homo sapiens OX=9606 GN=TXN PE=1 SV=3	1.45733	Modified residue	Note=N6-acetyllysine%3B alternate;Ontology_term=ECO:0000250;evidence=ECO:0000250|UniProtKB:P10639
P10620_K42	MGST1	K*VFANPEDCVAFGK	MGST1_HUMAN Microsomal glutathione S-transferase 1 OS=Homo sapiens OX=9606 GN=MGST1 PE=1 SV=1	0.1642	Modified residue	Note=N6-acetyllysine;Ontology_term=ECO:0000250;evidence=ECO:0000250|UniProtKB:Q91VS7
P10644_K216	PRKAR1A	AATVK*AK	KAP0_HUMAN cAMP-dependent protein kinase type I-alpha regulatory subunit OS=Homo sapiens OX=9606 GN=PRKAR1A PE=1 SV=1	0.90607
P10644_K367	PRKAR1A	VLGPCSDILK*R	KAP0_HUMAN cAMP-dependent protein kinase type I-alpha regulatory subunit OS=Homo sapiens OX=9606 GN=PRKAR1A PE=1 SV=1	5.55556
P10809_K125	HSPD1	SIAK*EGFEK	CH60_HUMAN 60 kDa heat shock protein, mitochondrial OS=Homo sapiens OX=9606 GN=HSPD1 PE=1 SV=2	0.880643	Modified residue	Note=N6-acetyllysine%3B alternate;Ontology_term=ECO:0007744;evidence=ECO:0007744|PubMed:19608861;Dbxref=PMID:19608861
P10809_K130	HSPD1	EGFEK*ISK	CH60_HUMAN 60 kDa heat shock protein, mitochondrial OS=Homo sapiens OX=9606 GN=HSPD1 PE=1 SV=2	0.460697	Modified residue	Note=N6-acetyllysine;Ontology_term=ECO:0007744;evidence=ECO:0007744|PubMed:19608861;Dbxref=PMID:19608861
P10809_K133	HSPD1	ISK*GANPVEIR	CH60_HUMAN 60 kDa heat shock protein, mitochondrial OS=Homo sapiens OX=9606 GN=HSPD1 PE=1 SV=2	1.21822	Modified residue	Note=N6-acetyllysine%3B alternate;Ontology_term=ECO:0000250;evidence=ECO:0000250|UniProtKB:P63038
P10809_K196	HSPD1	K*GVITVK	CH60_HUMAN 60 kDa heat shock protein, mitochondrial OS=Homo sapiens OX=9606 GN=HSPD1 PE=1 SV=2	0.788197
P10809_K202	HSPD1	KGVITVK*DGK GVITVK*DGK	CH60_HUMAN 60 kDa heat shock protein, mitochondrial OS=Homo sapiens OX=9606 GN=HSPD1 PE=1 SV=2	2.05503	Modified residue	Note=N6-acetyllysine%3B alternate;Ontology_term=ECO:0007744;evidence=ECO:0007744|PubMed:19608861;Dbxref=PMID:19608861
P10809_K31	HSPD1	DVK*FGADAR	CH60_HUMAN 60 kDa heat shock protein, mitochondrial OS=Homo sapiens OX=9606 GN=HSPD1 PE=1 SV=2	0.38023	Modified residue	Note=N6-succinyllysine;Ontology_term=ECO:0000250;evidence=ECO:0000250|UniProtKB:P63038
P10809_K352	HSPD1	VGEVIVTK*DDAMLLK	CH60_HUMAN 60 kDa heat shock protein, mitochondrial OS=Homo sapiens OX=9606 GN=HSPD1 PE=1 SV=2	6.25	Modified residue	Note=N6-acetyllysine%3B alternate;Ontology_term=ECO:0007744;evidence=ECO:0007744|PubMed:19608861;Dbxref=PMID:19608861
P10809_K359	HSPD1	DDAMLLK*GK	CH60_HUMAN 60 kDa heat shock protein, mitochondrial OS=Homo sapiens OX=9606 GN=HSPD1 PE=1 SV=2	0.94088	Modified residue	Note=N6-acetyllysine;Ontology_term=ECO:0007744;evidence=ECO:0007744|PubMed:19608861;Dbxref=PMID:19608861
P10809_K364	HSPD1	GDK*AQIEK	CH60_HUMAN 60 kDa heat shock protein, mitochondrial OS=Homo sapiens OX=9606 GN=HSPD1 PE=1 SV=2	1.2382
P10809_K396	HSPD1	LAK*LSDGVAVLK	CH60_HUMAN 60 kDa heat shock protein, mitochondrial OS=Homo sapiens OX=9606 GN=HSPD1 PE=1 SV=2	8.33601	Modified residue	Note=N6-acetyllysine%3B alternate;Ontology_term=ECO:0007744;evidence=ECO:0007744|PubMed:19608861;Dbxref=PMID:19608861
P10809_K417	HSPD1	VGGTSDVEVNEK*K	CH60_HUMAN 60 kDa heat shock protein, mitochondrial OS=Homo sapiens OX=9606 GN=HSPD1 PE=1 SV=2	1.69492
P10809_K473	HSPD1	TLK*IPAMTIAK	CH60_HUMAN 60 kDa heat shock protein, mitochondrial OS=Homo sapiens OX=9606 GN=HSPD1 PE=1 SV=2	0.45536
P10809_K523	HSPD1	GIIDPTK*VVR	CH60_HUMAN 60 kDa heat shock protein, mitochondrial OS=Homo sapiens OX=9606 GN=HSPD1 PE=1 SV=2	1.75879
P10809_K75	HSPD1	VTK*DGVTVAK	CH60_HUMAN 60 kDa heat shock protein, mitochondrial OS=Homo sapiens OX=9606 GN=HSPD1 PE=1 SV=2	3.65289	Modified residue	Note=N6-acetyllysine;Ontology_term=ECO:0000250;evidence=ECO:0000250|UniProtKB:P63038
P10809_K91	HSPD1	YK*NIGAK	CH60_HUMAN 60 kDa heat shock protein, mitochondrial OS=Homo sapiens OX=9606 GN=HSPD1 PE=1 SV=2	0.60154	Modified residue	Note=N6-acetyllysine;Ontology_term=ECO:0000250;evidence=ECO:0000250|UniProtKB:P63038
P11021_K185	HSPA5	QATK*DAGTIAGLNVMR	BIP_HUMAN Endoplasmic reticulum chaperone BiP OS=Homo sapiens OX=9606 GN=HSPA5 PE=1 SV=2	8.88158
P11021_K213	HSPA5	IINEPTAAAIAYGLDK*R	BIP_HUMAN Endoplasmic reticulum chaperone BiP OS=Homo sapiens OX=9606 GN=HSPA5 PE=1 SV=2	6.09475	Modified residue	Note=N6-acetyllysine;Ontology_term=ECO:0000250;evidence=ECO:0000250|UniProtKB:P20029
P11021_K287	HSPA5	AVQK*LR	BIP_HUMAN Endoplasmic reticulum chaperone BiP OS=Homo sapiens OX=9606 GN=HSPA5 PE=1 SV=2	5.60175
P11021_K326	HSPA5	AK*FEELNMDLFR	BIP_HUMAN Endoplasmic reticulum chaperone BiP OS=Homo sapiens OX=9606 GN=HSPA5 PE=1 SV=2	7.68445	Modified residue	Note=N6-acetyllysine;Ontology_term=ECO:0000250;evidence=ECO:0000250|UniProtKB:P20029
P11021_K340	HSPA5	STMK*PVQK	BIP_HUMAN Endoplasmic reticulum chaperone BiP OS=Homo sapiens OX=9606 GN=HSPA5 PE=1 SV=2	3.57018
P11021_K344	HSPA5	STMKPVQK*VLEDSDLK	BIP_HUMAN Endoplasmic reticulum chaperone BiP OS=Homo sapiens OX=9606 GN=HSPA5 PE=1 SV=2	0.12048
P11021_K353	HSPA5	K*SDIDEIVLVGGSTR	BIP_HUMAN Endoplasmic reticulum chaperone BiP OS=Homo sapiens OX=9606 GN=HSPA5 PE=1 SV=2	10	Modified residue$Cross-link	Note=N6-acetyllysine%3B alternate;Ontology_term=ECO:0000250;evidence=ECO:0000250|UniProtKB:P20029$Note=Glycyl lysine isopeptide (Lys-Gly) (interchain with G-Cter in SUMO1)%3B alternate;Ontology_term=ECO:0007744;evidence=ECO:0007744|PubMed:25114211;Dbxref=PMID:25114211
P11021_K370	HSPA5	IPK*IQQLVK	BIP_HUMAN Endoplasmic reticulum chaperone BiP OS=Homo sapiens OX=9606 GN=HSPA5 PE=1 SV=2	2.74664
P11021_K382	HSPA5	EFFNGK*EPSR	BIP_HUMAN Endoplasmic reticulum chaperone BiP OS=Homo sapiens OX=9606 GN=HSPA5 PE=1 SV=2	1.17647
P11021_K446	HSPA5	NTVVPTK*K	BIP_HUMAN Endoplasmic reticulum chaperone BiP OS=Homo sapiens OX=9606 GN=HSPA5 PE=1 SV=2	4.05464
P11021_K474	HSPA5	VYEGERPLTK*DNHLLGTFDLTGIPPAPR	BIP_HUMAN Endoplasmic reticulum chaperone BiP OS=Homo sapiens OX=9606 GN=HSPA5 PE=1 SV=2	5.26316
P11021_K516	HSPA5	VTAEDK*GTGNK	BIP_HUMAN Endoplasmic reticulum chaperone BiP OS=Homo sapiens OX=9606 GN=HSPA5 PE=1 SV=2	1.40195
P11021_K523	HSPA5	NK*ITITNDQNR	BIP_HUMAN Endoplasmic reticulum chaperone BiP OS=Homo sapiens OX=9606 GN=HSPA5 PE=1 SV=2	1.45611
P11021_K553	HSPA5	FAEEDK*K	BIP_HUMAN Endoplasmic reticulum chaperone BiP OS=Homo sapiens OX=9606 GN=HSPA5 PE=1 SV=2	4.51304
P11021_K617	HSPA5	IEWLESHQDADIEDFK*AK	BIP_HUMAN Endoplasmic reticulum chaperone BiP OS=Homo sapiens OX=9606 GN=HSPA5 PE=1 SV=2	1.25313
P11021_K81	HSPA5	LIGDAAK*NQLTSNPENTVFDAK	BIP_HUMAN Endoplasmic reticulum chaperone BiP OS=Homo sapiens OX=9606 GN=HSPA5 PE=1 SV=2	1.31531
P11021_K96	HSPA5	NQLTSNPENTVFDAK*R	BIP_HUMAN Endoplasmic reticulum chaperone BiP OS=Homo sapiens OX=9606 GN=HSPA5 PE=1 SV=2	6.79771
P11142_K108	HSPA8	VQVEYK*GETK	HSP7C_HUMAN Heat shock cognate 71 kDa protein OS=Homo sapiens OX=9606 GN=HSPA8 PE=1 SV=1	1.11971	Modified residue	Note=N6-acetyllysine;Ontology_term=ECO:0000250;evidence=ECO:0000250|UniProtKB:P63017
P11142_K112	HSPA8	GETK*SFYPEEVSSMVLTK	HSP7C_HUMAN Heat shock cognate 71 kDa protein OS=Homo sapiens OX=9606 GN=HSPA8 PE=1 SV=1	2.58348
P11142_K159	HSPA8	QATK*DAGTIAGLNVLR	HSP7C_HUMAN Heat shock cognate 71 kDa protein OS=Homo sapiens OX=9606 GN=HSPA8 PE=1 SV=1	4.66146
P11142_K187	HSPA8	IINEPTAAAIAYGLDK*K	HSP7C_HUMAN Heat shock cognate 71 kDa protein OS=Homo sapiens OX=9606 GN=HSPA8 PE=1 SV=1	2.04514
P11142_K188	HSPA8	K*VGAER	HSP7C_HUMAN Heat shock cognate 71 kDa protein OS=Homo sapiens OX=9606 GN=HSPA8 PE=1 SV=1	0.63694
P11142_K246	HSPA8	MVNHFIAEFK*R	HSP7C_HUMAN Heat shock cognate 71 kDa protein OS=Homo sapiens OX=9606 GN=HSPA8 PE=1 SV=1	9.26879	Modified residue	Note=N6-acetyllysine;Ontology_term=ECO:0007744;evidence=ECO:0007744|PubMed:19608861;Dbxref=PMID:19608861
P11142_K251	HSPA8	K*DISENKR	HSP7C_HUMAN Heat shock cognate 71 kDa protein OS=Homo sapiens OX=9606 GN=HSPA8 PE=1 SV=1	0.734375
P11142_K257	HSPA8	DISENK*R	HSP7C_HUMAN Heat shock cognate 71 kDa protein OS=Homo sapiens OX=9606 GN=HSPA8 PE=1 SV=1	1.4386
P11142_K319	HSPA8	GTLDPVEK*ALR	HSP7C_HUMAN Heat shock cognate 71 kDa protein OS=Homo sapiens OX=9606 GN=HSPA8 PE=1 SV=1	3.77399	Modified residue	Note=N6-acetyllysine%3B alternate;Ontology_term=ECO:0007744;evidence=ECO:0007744|PubMed:19608861;Dbxref=PMID:19608861
P11142_K328	HSPA8	LDK*SQIHDIVLVGGSTR	HSP7C_HUMAN Heat shock cognate 71 kDa protein OS=Homo sapiens OX=9606 GN=HSPA8 PE=1 SV=1	5.58178	Modified residue	Note=N6-acetyllysine;Ontology_term=ECO:0000250;evidence=ECO:0000250|UniProtKB:P63017
P11142_K451	HSPA8	AMTK*DNNLLGK	HSP7C_HUMAN Heat shock cognate 71 kDa protein OS=Homo sapiens OX=9606 GN=HSPA8 PE=1 SV=1	5.97928
P11142_K497	HSPA8	STGK*ENK	HSP7C_HUMAN Heat shock cognate 71 kDa protein OS=Homo sapiens OX=9606 GN=HSPA8 PE=1 SV=1	1.2129
P11142_K500	HSPA8	ENK*ITITNDK	HSP7C_HUMAN Heat shock cognate 71 kDa protein OS=Homo sapiens OX=9606 GN=HSPA8 PE=1 SV=1	1.10602
P11142_K512	HSPA8	LSK*EDIER	HSP7C_HUMAN Heat shock cognate 71 kDa protein OS=Homo sapiens OX=9606 GN=HSPA8 PE=1 SV=1	3.53351	Modified residue$Cross-link	Note=N6-acetyllysine%3B alternate;Ontology_term=ECO:0000250;evidence=ECO:0000250|UniProtKB:P63017$Note=Glycyl lysine isopeptide (Lys-Gly) (interchain with G-Cter in SUMO1)%3B alternate;Ontology_term=ECO:0007744;evidence=ECO:0007744|PubMed:25114211;Dbxref=PMID:25114211
P11142_K531	HSPA8	YKAEDEK*QR	HSP7C_HUMAN Heat shock cognate 71 kDa protein OS=Homo sapiens OX=9606 GN=HSPA8 PE=1 SV=1	1.69596
P11142_K535	HSPA8	DK*VSSK	HSP7C_HUMAN Heat shock cognate 71 kDa protein OS=Homo sapiens OX=9606 GN=HSPA8 PE=1 SV=1	1.47994
P11142_K56	HSPA8	LIGDAAK*NQVAMNPTNTVFDAK	HSP7C_HUMAN Heat shock cognate 71 kDa protein OS=Homo sapiens OX=9606 GN=HSPA8 PE=1 SV=1	1.07279
P11142_K589	HSPA8	NQTAEK*EEFEHQQK	HSP7C_HUMAN Heat shock cognate 71 kDa protein OS=Homo sapiens OX=9606 GN=HSPA8 PE=1 SV=1	2.76754	Modified residue	Note=N6-acetyllysine;Ontology_term=ECO:0007744;evidence=ECO:0007744|PubMed:19608861;Dbxref=PMID:19608861
P11142_K597	HSPA8	EEFEHQQK*ELEK NQTAEKEEFEHQQK*ELEK	HSP7C_HUMAN Heat shock cognate 71 kDa protein OS=Homo sapiens OX=9606 GN=HSPA8 PE=1 SV=1	2.01567	Modified residue	Note=N6-acetyllysine;Ontology_term=ECO:0007744;evidence=ECO:0007744|PubMed:19608861;Dbxref=PMID:19608861
P11142_K71	HSPA8	NQVAMNPTNTVFDAK*R	HSP7C_HUMAN Heat shock cognate 71 kDa protein OS=Homo sapiens OX=9606 GN=HSPA8 PE=1 SV=1	5.79847
P11142_K88	HSPA8	FDDAVVQSDMK*HWPFMVVNDAGRPK	HSP7C_HUMAN Heat shock cognate 71 kDa protein OS=Homo sapiens OX=9606 GN=HSPA8 PE=1 SV=1	6.10673
P11166_K245	SLC2A1	GTADVTHDLQEMK*EESR	GTR1_HUMAN Solute carrier family 2, facilitated glucose transporter member 1 OS=Homo sapiens OX=9606 GN=SLC2A1 PE=1 SV=2	0.801045
P11216_K597	PYGB	DPAK*AFVPR	PYGB_HUMAN Glycogen phosphorylase, brain form OS=Homo sapiens OX=9606 GN=PYGB PE=1 SV=5	6.66667
P11387_K545	TOP1	VPVEK*R	TOP1_HUMAN DNA topoisomerase 1 OS=Homo sapiens OX=9606 GN=TOP1 PE=1 SV=2	0.79365
P11388_K798	TOP2A	LHGGK*DSASPR	TOP2A_HUMAN DNA topoisomerase 2-alpha OS=Homo sapiens OX=9606 GN=TOP2A PE=1 SV=3	0.894213
P11413_K171	G6PD	IIVEK*PFGR	G6PD_HUMAN Glucose-6-phosphate 1-dehydrogenase OS=Homo sapiens OX=9606 GN=G6PD PE=1 SV=4	7.17082	Modified residue	Note=N6-acetyllysine;Ontology_term=ECO:0007744;evidence=ECO:0007744|PubMed:19608861;Dbxref=PMID:19608861
P11413_K386	G6PD	LQFHDVAGDIFHQQCK*R	G6PD_HUMAN Glucose-6-phosphate 1-dehydrogenase OS=Homo sapiens OX=9606 GN=G6PD PE=1 SV=4	3.66526
P11413_K497	G6PD	GPTEADELMK*R	G6PD_HUMAN Glucose-6-phosphate 1-dehydrogenase OS=Homo sapiens OX=9606 GN=G6PD PE=1 SV=4	3.30614	Modified residue	Note=N6-acetyllysine;Ontology_term=ECO:0007744;evidence=ECO:0007744|PubMed:19608861;Dbxref=PMID:19608861
P11586_K333	MTHFD1	PIGK*LAR	C1TC_HUMAN C-1-tetrahydrofolate synthase, cytoplasmic OS=Homo sapiens OX=9606 GN=MTHFD1 PE=1 SV=3	0.925145
P11586_K825	MTHFD1	LPVEDK*IR	C1TC_HUMAN C-1-tetrahydrofolate synthase, cytoplasmic OS=Homo sapiens OX=9606 GN=MTHFD1 PE=1 SV=3	1.25
P11908_K212	PRPS2	MVLVGDVK*DR	PRPS2_HUMAN Ribose-phosphate pyrophosphokinase 2 OS=Homo sapiens OX=9606 GN=PRPS2 PE=1 SV=2	1.20482
P11940_K512	PABPC1	TVPQYK*YAAGVR	PABP1_HUMAN Polyadenylate-binding protein 1 OS=Homo sapiens OX=9606 GN=PABPC1 PE=1 SV=2	0.25871	Modified residue	Note=N6-acetyllysine;Ontology_term=ECO:0007744;evidence=ECO:0007744|PubMed:19608861;Dbxref=PMID:19608861
P11940_K620	PABPC1	SKVDEAVAVLQAHQAK*EAAQK	PABP1_HUMAN Polyadenylate-binding protein 1 OS=Homo sapiens OX=9606 GN=PABPC1 PE=1 SV=2	5.55556
P12081_K12	HARS1	AALEELVK*LQGER	HARS1_HUMAN Histidine--tRNA ligase, cytoplasmic OS=Homo sapiens OX=9606 GN=HARS1 PE=1 SV=2	8.33333
P12235_K147	SLC25A4	LAADVGK*GAAQR	ADT1_HUMAN ADP/ATP translocase 1 OS=Homo sapiens OX=9606 GN=SLC25A4 PE=1 SV=4	1.00846	Modified residue	Note=N6-succinyllysine;Ontology_term=ECO:0000250;evidence=ECO:0000250|UniProtKB:P48962
P12236_K147	SLC25A6	LAADVGK*SGTER	ADT3_HUMAN ADP/ATP translocase 3 OS=Homo sapiens OX=9606 GN=SLC25A6 PE=1 SV=4	0.938885
P12236_K163	SLC25A6	GLGDCLVK*ITK	ADT3_HUMAN ADP/ATP translocase 3 OS=Homo sapiens OX=9606 GN=SLC25A6 PE=1 SV=4	0.68582
P12236_K166	SLC25A6	ITK*SDGIR	ADT3_HUMAN ADP/ATP translocase 3 OS=Homo sapiens OX=9606 GN=SLC25A6 PE=1 SV=4	1.37013
P12268_K134	IMPDH2	DVFEAK*AR	IMDH2_HUMAN Inosine-5'-monophosphate dehydrogenase 2 OS=Homo sapiens OX=9606 GN=IMPDH2 PE=1 SV=2	0.844643
P12268_K422	IMPDH2	GMGSLDAMDK*HLSSQNR	IMDH2_HUMAN Inosine-5'-monophosphate dehydrogenase 2 OS=Homo sapiens OX=9606 GN=IMPDH2 PE=1 SV=2	0.868507
P12268_K436	IMPDH2	YFSEADK*IK	IMDH2_HUMAN Inosine-5'-monophosphate dehydrogenase 2 OS=Homo sapiens OX=9606 GN=IMPDH2 PE=1 SV=2	0.617617
P12268_K438	IMPDH2	IK*VAQGVSGAVQDK	IMDH2_HUMAN Inosine-5'-monophosphate dehydrogenase 2 OS=Homo sapiens OX=9606 GN=IMPDH2 PE=1 SV=2	0.33003	Cross-link	Note=Glycyl lysine isopeptide (Lys-Gly) (interchain with G-Cter in SUMO2);Ontology_term=ECO:0007744;evidence=ECO:0007744|PubMed:28112733;Dbxref=PMID:28112733
P12268_K450	IMPDH2	VAQGVSGAVQDK*GSIHK	IMDH2_HUMAN Inosine-5'-monophosphate dehydrogenase 2 OS=Homo sapiens OX=9606 GN=IMPDH2 PE=1 SV=2	0.780567
P12268_K511	IMPDH2	TSSAQVEGGVHSLHSYEK*R	IMDH2_HUMAN Inosine-5'-monophosphate dehydrogenase 2 OS=Homo sapiens OX=9606 GN=IMPDH2 PE=1 SV=2	0.778988	Modified residue	Note=N6-acetyllysine;Ontology_term=ECO:0007744;evidence=ECO:0007744|PubMed:19608861;Dbxref=PMID:19608861
P12429_K154	ANXA3	K*ALLTLADGR	ANXA3_HUMAN Annexin A3 OS=Homo sapiens OX=9606 GN=ANXA3 PE=1 SV=3	6.30217
P12429_K210	ANXA3	SFPQLK*LTFDEYR	ANXA3_HUMAN Annexin A3 OS=Homo sapiens OX=9606 GN=ANXA3 PE=1 SV=3	3.26585
P12429_K263	ANXA3	ALK*GIGTDEFTLNR	ANXA3_HUMAN Annexin A3 OS=Homo sapiens OX=9606 GN=ANXA3 PE=1 SV=3	1.36329
P12814_K327	ACTN1	LHKPPK*VQEK	ACTN1_HUMAN Alpha-actinin-1 OS=Homo sapiens OX=9606 GN=ACTN1 PE=1 SV=2	0.81967
P12814_K420	ACTN1	QK*DYETATLSEIK	ACTN1_HUMAN Alpha-actinin-1 OS=Homo sapiens OX=9606 GN=ACTN1 PE=1 SV=2	1.07827
P12814_K89	ACTN1	VHK*ISNVNK	ACTN1_HUMAN Alpha-actinin-1 OS=Homo sapiens OX=9606 GN=ACTN1 PE=1 SV=2	0.892287
P12956_K189	XRCC6	TK*AGDLR	XRCC6_HUMAN X-ray repair cross-complementing protein 6 OS=Homo sapiens OX=9606 GN=XRCC6 PE=1 SV=2	0.838456
P12956_K238	XRCC6	VHFEESSK*LEDLLR	XRCC6_HUMAN X-ray repair cross-complementing protein 6 OS=Homo sapiens OX=9606 GN=XRCC6 PE=1 SV=2	10
P12956_K317	XRCC6	TFNTSTGGLLLPSDTK*R	XRCC6_HUMAN X-ray repair cross-complementing protein 6 OS=Homo sapiens OX=9606 GN=XRCC6 PE=1 SV=2	6.20301	Cross-link	Note=Glycyl lysine isopeptide (Lys-Gly) (interchain with G-Cter in SUMO2);Ontology_term=ECO:0007744;evidence=ECO:0007744|PubMed:28112733;Dbxref=PMID:28112733
P12956_K468	XRCC6	AIVEK*LR	XRCC6_HUMAN X-ray repair cross-complementing protein 6 OS=Homo sapiens OX=9606 GN=XRCC6 PE=1 SV=2	1.16021
P12956_K591	XRCC6	AYGLK*SGLK	XRCC6_HUMAN X-ray repair cross-complementing protein 6 OS=Homo sapiens OX=9606 GN=XRCC6 PE=1 SV=2	0.34014
P12956_K596	XRCC6	K*QELLEALTK	XRCC6_HUMAN X-ray repair cross-complementing protein 6 OS=Homo sapiens OX=9606 GN=XRCC6 PE=1 SV=2	0.9901
P13010_K195	XRCC5	LGGHGPSFPLK*GITEQQK	XRCC5_HUMAN X-ray repair cross-complementing protein 5 OS=Homo sapiens OX=9606 GN=XRCC5 PE=1 SV=3	0.88496	Cross-link	Note=Glycyl lysine isopeptide (Lys-Gly) (interchain with G-Cter in SUMO2);Ontology_term=ECO:0007744;evidence=ECO:0007744|PubMed:28112733;Dbxref=PMID:28112733
P13010_K399	XRCC5	YAYDK*R	XRCC5_HUMAN X-ray repair cross-complementing protein 5 OS=Homo sapiens OX=9606 GN=XRCC5 PE=1 SV=3	0.76336
P13010_K665	XRCC5	ALQEK*VEIK	XRCC5_HUMAN X-ray repair cross-complementing protein 5 OS=Homo sapiens OX=9606 GN=XRCC5 PE=1 SV=3	0.27357	Modified residue	Note=N6-acetyllysine;Ontology_term=ECO:0007744;evidence=ECO:0007744|PubMed:19608861;Dbxref=PMID:19608861
P13073_K29	COX4I1	AHESVVK*SEDFSLPAYMDR	COX41_HUMAN Cytochrome c oxidase subunit 4 isoform 1, mitochondrial OS=Homo sapiens OX=9606 GN=COX4I1 PE=1 SV=1	1.04167	Modified residue	Note=N6-acetyllysine%3B alternate;Ontology_term=ECO:0000250;evidence=ECO:0000250|UniProtKB:P19783
P13489_K46	RNH1	CK*DISSALR	RINI_HUMAN Ribonuclease inhibitor OS=Homo sapiens OX=9606 GN=RNH1 PE=1 SV=2	1.01565
P13639_K252	EEF2	K*VEDMMK	EF2_HUMAN Elongation factor 2 OS=Homo sapiens OX=9606 GN=EEF2 PE=1 SV=4	0.940762
P13639_K259	EEF2	K*LWGDR	EF2_HUMAN Elongation factor 2 OS=Homo sapiens OX=9606 GN=EEF2 PE=1 SV=4	0.41092
P13639_K275	EEF2	FSK*SATSPEGK	EF2_HUMAN Elongation factor 2 OS=Homo sapiens OX=9606 GN=EEF2 PE=1 SV=4	1.60782	Modified residue	Note=N6-acetyllysine;Ontology_term=ECO:0007744;evidence=ECO:0007744|PubMed:19608861;Dbxref=PMID:19608861
P13639_K318	EEF2	LIEK*LDIK	EF2_HUMAN Elongation factor 2 OS=Homo sapiens OX=9606 GN=EEF2 PE=1 SV=4	0.261728
P13639_K407	EEF2	MVPTSDK*GR	EF2_HUMAN Elongation factor 2 OS=Homo sapiens OX=9606 GN=EEF2 PE=1 SV=4	1.96502
P13639_K439	EEF2	K*EDLYLKPIQR	EF2_HUMAN Elongation factor 2 OS=Homo sapiens OX=9606 GN=EEF2 PE=1 SV=4	1.24128	Modified residue	Note=N6-acetyllysine;Ontology_term=ECO:0000250;evidence=ECO:0000250|UniProtKB:P58252
P13639_K445	EEF2	KEDLYLK*PIQR	EF2_HUMAN Elongation factor 2 OS=Homo sapiens OX=9606 GN=EEF2 PE=1 SV=4	3.61572	Modified residue	Note=N6-acetyllysine;Ontology_term=ECO:0007744;evidence=ECO:0007744|PubMed:19608861;Dbxref=PMID:19608861
P13639_K498	EEF2	VMK*FSVSPVVR	EF2_HUMAN Elongation factor 2 OS=Homo sapiens OX=9606 GN=EEF2 PE=1 SV=4	9.09091
P13639_K512	EEF2	VAVEAK*NPADLPK	EF2_HUMAN Elongation factor 2 OS=Homo sapiens OX=9606 GN=EEF2 PE=1 SV=4	5.3941
P13639_K572	EEF2	K*SDPVVSYR	EF2_HUMAN Elongation factor 2 OS=Homo sapiens OX=9606 GN=EEF2 PE=1 SV=4	0.804007	Modified residue	Note=N6-succinyllysine;Ontology_term=ECO:0000250;evidence=ECO:0000250|UniProtKB:P58252
P13639_K598	EEF2	SPNK*HNR	EF2_HUMAN Elongation factor 2 OS=Homo sapiens OX=9606 GN=EEF2 PE=1 SV=4	1.73084
P13639_K605	EEF2	LYMK*AR	EF2_HUMAN Elongation factor 2 OS=Homo sapiens OX=9606 GN=EEF2 PE=1 SV=4	2.33997	Site	Note=Cleavage;Ontology_term=ECO:0000269;evidence=ECO:0000269|PubMed:24648518;Dbxref=PMID:24648518
P13639_K619	EEF2	PFPDGLAEDIDK*GEVSAR	EF2_HUMAN Elongation factor 2 OS=Homo sapiens OX=9606 GN=EEF2 PE=1 SV=4	5.26316	Modified residue	Note=N6-acetyllysine;Ontology_term=ECO:0000250;evidence=ECO:0000250|UniProtKB:P58252
P13667_K163	PDIA4	TQEEIVAK*VR	PDIA4_HUMAN Protein disulfide-isomerase A4 OS=Homo sapiens OX=9606 GN=PDIA4 PE=1 SV=2	6.30545
P13667_K218	PDIA4	LAPEYEK*AAK	PDIA4_HUMAN Protein disulfide-isomerase A4 OS=Homo sapiens OX=9606 GN=PDIA4 PE=1 SV=2	2.77778
P13667_K234	PDIA4	SPPIPLAK*VDATAETDLAK	PDIA4_HUMAN Protein disulfide-isomerase A4 OS=Homo sapiens OX=9606 GN=PDIA4 PE=1 SV=2	4.91305
P13667_K582	PDIA4	GLVIAK*MDATANDVPSDR	PDIA4_HUMAN Protein disulfide-isomerase A4 OS=Homo sapiens OX=9606 GN=PDIA4 PE=1 SV=2	0.62112
P13667_K637	PDIA4	FIEEHATK*LSR	PDIA4_HUMAN Protein disulfide-isomerase A4 OS=Homo sapiens OX=9606 GN=PDIA4 PE=1 SV=2	10
P13674_K299	P4HA1	GEGIK*MTPR	P4HA1_HUMAN Prolyl 4-hydroxylase subunit alpha-1 OS=Homo sapiens OX=9606 GN=P4HA1 PE=1 SV=2	1.10461
P13693_K19	TPT1	DLISHDEMFSDIYK*IR	TCTP_HUMAN Translationally-controlled tumor protein OS=Homo sapiens OX=9606 GN=TPT1 PE=1 SV=1	9.92064
P13693_K93	TPT1	YIK*DYMK	TCTP_HUMAN Translationally-controlled tumor protein OS=Homo sapiens OX=9606 GN=TPT1 PE=1 SV=1	0.535173
P13726_K279	F3	K*AGVGQSWK	TF_HUMAN Tissue factor OS=Homo sapiens OX=9606 GN=F3 PE=1 SV=1	0.2994
P13797_K297	PLS3	INNFSADIK*DSK	PLST_HUMAN Plastin-3 OS=Homo sapiens OX=9606 GN=PLS3 PE=1 SV=4	1.75439
P13797_K437	PLS3	IK*VPVDWSK	PLST_HUMAN Plastin-3 OS=Homo sapiens OX=9606 GN=PLS3 PE=1 SV=4	8.33333
P13797_K447	PLS3	VNK*PPYPK	PLST_HUMAN Plastin-3 OS=Homo sapiens OX=9606 GN=PLS3 PE=1 SV=4	1.02041
P14314_K180	PRKCSH	TVK*EEAEKPER	GLU2B_HUMAN Glucosidase 2 subunit beta OS=Homo sapiens OX=9606 GN=PRKCSH PE=1 SV=2	0.81392
P14314_K191	PRKCSH	EAK*EQHQK	GLU2B_HUMAN Glucosidase 2 subunit beta OS=Homo sapiens OX=9606 GN=PRKCSH PE=1 SV=2	3.33333
P14314_K196	PRKCSH	EQHQK*LWEEQLAAAK	GLU2B_HUMAN Glucosidase 2 subunit beta OS=Homo sapiens OX=9606 GN=PRKCSH PE=1 SV=2	5.55556
P14314_K376	PRKCSH	NK*FEEAER	GLU2B_HUMAN Glucosidase 2 subunit beta OS=Homo sapiens OX=9606 GN=PRKCSH PE=1 SV=2	5.75255
P14314_K385	PRKCSH	SLK*DMEESIR	GLU2B_HUMAN Glucosidase 2 subunit beta OS=Homo sapiens OX=9606 GN=PRKCSH PE=1 SV=2	6.06618
P14324_K295	FDPS	EHANAK*K	FPPS_HUMAN Farnesyl pyrophosphate synthase OS=Homo sapiens OX=9606 GN=FDPS PE=1 SV=4	0.96154
P14618_K115	PKM	PVAVALDTK*GPEIR	KPYM_HUMAN Pyruvate kinase PKM OS=Homo sapiens OX=9606 GN=PKM PE=1 SV=4	3.19794	Cross-link	Note=Glycyl lysine isopeptide (Lys-Gly) (interchain with G-Cter in SUMO2);Ontology_term=ECO:0007744;evidence=ECO:0007744|PubMed:28112733;Dbxref=PMID:28112733
P14618_K125	PKM	TGLIK*GSGTAEVELK	KPYM_HUMAN Pyruvate kinase PKM OS=Homo sapiens OX=9606 GN=PKM PE=1 SV=4	4.32235
P14618_K135	PKM	GSGTAEVELK*K	KPYM_HUMAN Pyruvate kinase PKM OS=Homo sapiens OX=9606 GN=PKM PE=1 SV=4	2.40117
P14618_K141	PKM	GATLK*ITLDNAYMEK	KPYM_HUMAN Pyruvate kinase PKM OS=Homo sapiens OX=9606 GN=PKM PE=1 SV=4	0.691153
P14618_K186	PKM	IYVDDGLISLQVK*QK	KPYM_HUMAN Pyruvate kinase PKM OS=Homo sapiens OX=9606 GN=PKM PE=1 SV=4	2.65427
P14618_K206	PKM	GADFLVTEVENGGSLGSK*K	KPYM_HUMAN Pyruvate kinase PKM OS=Homo sapiens OX=9606 GN=PKM PE=1 SV=4	2.6078
P14618_K247	PKM	K*ASDVHEVR	KPYM_HUMAN Pyruvate kinase PKM OS=Homo sapiens OX=9606 GN=PKM PE=1 SV=4	2.70096
P14618_K261	PKM	VLGEK*GK	KPYM_HUMAN Pyruvate kinase PKM OS=Homo sapiens OX=9606 GN=PKM PE=1 SV=4	1.30128
P14618_K266	PKM	NIK*IISK	KPYM_HUMAN Pyruvate kinase PKM OS=Homo sapiens OX=9606 GN=PKM PE=1 SV=4	2.08277	Modified residue$Cross-link	Note=N6-acetyllysine%3B alternate;Ontology_term=ECO:0007744;evidence=ECO:0007744|PubMed:19608861;Dbxref=PMID:19608861$Note=Glycyl lysine isopeptide (Lys-Gly) (interchain with G-Cter in SUMO2)%3B alternate;Ontology_term=ECO:0007744;evidence=ECO:0007744|PubMed:28112733;Dbxref=PMID:28112733
P14618_K270	PKM	IISK*IENHEGVR	KPYM_HUMAN Pyruvate kinase PKM OS=Homo sapiens OX=9606 GN=PKM PE=1 SV=4	4.23252	Site$Modified residue$Cross-link	Note=Transition state stabilizer;Ontology_term=ECO:0000250;evidence=ECO:0000250|UniProtKB:P00549$Note=N6-acetyllysine%3B alternate;Ontology_term=ECO:0000250;evidence=ECO:0000250|UniProtKB:P52480$Note=Glycyl lysine isopeptide (Lys-Gly) (interchain with G-Cter in SUMO2)%3B alternate;Ontology_term=ECO:0007744;evidence=ECO:0007744|PubMed:28112733;Dbxref=PMID:28112733
P14618_K367	PKM	AEGSDVANAVLDGADCIMLSGETAK*GDYPLEAVR	KPYM_HUMAN Pyruvate kinase PKM OS=Homo sapiens OX=9606 GN=PKM PE=1 SV=4	5.55556
P14618_K498	PKM	VNFAMNVGK*AR	KPYM_HUMAN Pyruvate kinase PKM OS=Homo sapiens OX=9606 GN=PKM PE=1 SV=4	6.87925	Modified residue	Note=N6-succinyllysine;Ontology_term=ECO:0000250;evidence=ECO:0000250|UniProtKB:P52480
P14618_K62	PKM	SVETLK*EMIK	KPYM_HUMAN Pyruvate kinase PKM OS=Homo sapiens OX=9606 GN=PKM PE=1 SV=4	2.66906	Modified residue	Note=N6-acetyllysine;Ontology_term=ECO:0007744;evidence=ECO:0007744|PubMed:19608861;Dbxref=PMID:19608861
P14618_K66	PKM	EMIK*SGMNVAR	KPYM_HUMAN Pyruvate kinase PKM OS=Homo sapiens OX=9606 GN=PKM PE=1 SV=4	3.34414	Modified residue	Note=N6-succinyllysine;Ontology_term=ECO:0000250;evidence=ECO:0000250|UniProtKB:P52480
P14618_K89	PKM	LNFSHGTHEYHAETIK*NVR	KPYM_HUMAN Pyruvate kinase PKM OS=Homo sapiens OX=9606 GN=PKM PE=1 SV=4	7.35656	Modified residue	Note=N6-acetyllysine;Ontology_term=ECO:0007744;evidence=ECO:0007744|PubMed:19608861;Dbxref=PMID:19608861
P14625_K161	HSP90B1	EELVK*NLGTIAK	ENPL_HUMAN Endoplasmin OS=Homo sapiens OX=9606 GN=HSP90B1 PE=1 SV=1	0.81301
P14625_K168	HSP90B1	NLGTIAK*SGTSEFLNK	ENPL_HUMAN Endoplasmin OS=Homo sapiens OX=9606 GN=HSP90B1 PE=1 SV=1	0.851588
P14625_K404	HSP90B1	GLFDEYGSK*K	ENPL_HUMAN Endoplasmin OS=Homo sapiens OX=9606 GN=HSP90B1 PE=1 SV=1	2.1837	Modified residue	Note=N6-succinyllysine;Ontology_term=ECO:0000250;evidence=ECO:0000250|UniProtKB:P08113
P14625_K593	HSP90B1	FQNVAK*EGVK	ENPL_HUMAN Endoplasmin OS=Homo sapiens OX=9606 GN=HSP90B1 PE=1 SV=1	5.55556
P14625_K597	HSP90B1	EGVK*FDESEK	ENPL_HUMAN Endoplasmin OS=Homo sapiens OX=9606 GN=HSP90B1 PE=1 SV=1	6.56543
P14625_K603	HSP90B1	FDESEK*TK	ENPL_HUMAN Endoplasmin OS=Homo sapiens OX=9606 GN=HSP90B1 PE=1 SV=1	10
P14625_K663	HSP90B1	IMK*AQAYQTGK	ENPL_HUMAN Endoplasmin OS=Homo sapiens OX=9606 GN=HSP90B1 PE=1 SV=1	0.82408
P14625_K683	HSP90B1	K*TFEINPR	ENPL_HUMAN Endoplasmin OS=Homo sapiens OX=9606 GN=HSP90B1 PE=1 SV=1	1.21684
P14735_K854	IDE	FIIQSEK*PPHYLESR	IDE_HUMAN Insulin-degrading enzyme OS=Homo sapiens OX=9606 GN=IDE PE=1 SV=4	1.10717
P14866_K493	HNRNPL	FSTPEQAAK*NR	HNRPL_HUMAN Heterogeneous nuclear ribonucleoprotein L OS=Homo sapiens OX=9606 GN=HNRNPL PE=1 SV=2	2.31938
P14868_K451	DARS1	ALHHGIDLEK*IK	SYDC_HUMAN Aspartate--tRNA ligase, cytoplasmic OS=Homo sapiens OX=9606 GN=DARS1 PE=1 SV=2	9.23212
P14868_K9	DARS1	K*SQEKPR	SYDC_HUMAN Aspartate--tRNA ligase, cytoplasmic OS=Homo sapiens OX=9606 GN=DARS1 PE=1 SV=2	0.68966
P15121_K235	AKR1B1	IK*AIAAK	ALDR_HUMAN Aldo-keto reductase family 1 member B1 OS=Homo sapiens OX=9606 GN=AKR1B1 PE=1 SV=3	5.4386
P15121_K263	AKR1B1	NLVVIPK*SVTPER	ALDR_HUMAN Aldo-keto reductase family 1 member B1 OS=Homo sapiens OX=9606 GN=AKR1B1 PE=1 SV=3	7.19365	Modified residue	Note=N6-acetyllysine;Ontology_term=ECO:0007744;evidence=ECO:0007744|PubMed:19608861;Dbxref=PMID:19608861
P15311_K139	EZR	FGDYNK*EVHK	EZRI_HUMAN Ezrin OS=Homo sapiens OX=9606 GN=EZR PE=1 SV=4	0.727745
P15311_K143	EZR	EVHK*SGYLSSER	EZRI_HUMAN Ezrin OS=Homo sapiens OX=9606 GN=EZR PE=1 SV=4	5.26316
P15311_K162	EZR	VMDQHK*LTR	EZRI_HUMAN Ezrin OS=Homo sapiens OX=9606 GN=EZR PE=1 SV=4	2.24421
P15311_K184	EZR	GMLK*DNAMLEYLK	EZRI_HUMAN Ezrin OS=Homo sapiens OX=9606 GN=EZR PE=1 SV=4	6.00285
P15311_K337	EZR	EK*EQMMR	EZRI_HUMAN Ezrin OS=Homo sapiens OX=9606 GN=EZR PE=1 SV=4	4.5664
P15311_K344	EZR	EK*EELMLR	EZRI_HUMAN Ezrin OS=Homo sapiens OX=9606 GN=EZR PE=1 SV=4	6.53947
P15311_K357	EZR	LQDYEEK*TK	EZRI_HUMAN Ezrin OS=Homo sapiens OX=9606 GN=EZR PE=1 SV=4	1.56735
P15692_K149	VEGFA	GKGK*GQK	VEGFA_HUMAN Vascular endothelial growth factor A OS=Homo sapiens OX=9606 GN=VEGFA PE=1 SV=2	0.9591
P15880_K263	RPS2	ETVFTK*SPYQEFTDHLVK	RS2_HUMAN 40S ribosomal protein S2 OS=Homo sapiens OX=9606 GN=RPS2 PE=1 SV=2	1.31579	Modified residue	Note=N6-acetyllysine;Ontology_term=ECO:0007744;evidence=ECO:0007744|PubMed:19608861;Dbxref=PMID:19608861
P15924_K1916	DSP	K*LEDSTR	DESP_HUMAN Desmoplakin OS=Homo sapiens OX=9606 GN=DSP PE=1 SV=3	0.39062
P16070_K158	CD44	YVQK*GEYR	CD44_HUMAN CD44 antigen OS=Homo sapiens OX=9606 GN=CD44 PE=1 SV=3	4.08654
P16104_K134	H2AX	APSGGK*K	H2AX_HUMAN Histone H2AX OS=Homo sapiens OX=9606 GN=H2AX PE=1 SV=2	2.27273
P16104_K37	H2AX	K*GHYAER	H2AX_HUMAN Histone H2AX OS=Homo sapiens OX=9606 GN=H2AX PE=1 SV=2	3.21763	Modified residue	Note=N6-acetyllysine;Ontology_term=ECO:0000250;evidence=ECO:0000250|UniProtKB:P27661
P16144_K1021	ITGB4	VLDGGK*SQVSYR	ITB4_HUMAN Integrin beta-4 OS=Homo sapiens OX=9606 GN=ITGB4 PE=1 SV=5	5
P16144_K785	ITGB4	SGNLK*GR	ITB4_HUMAN Integrin beta-4 OS=Homo sapiens OX=9606 GN=ITGB4 PE=1 SV=5	1.96049
P16401_K188	H1-5	KATK*SPAK	H15_HUMAN Histone H1.5 OS=Homo sapiens OX=9606 GN=H1-5 PE=1 SV=3	1.42857
P16402_K118	H1-3	AASGEGK*PK	H13_HUMAN Histone H1.3 OS=Homo sapiens OX=9606 GN=H1-3 PE=1 SV=2	2.5641
P16403_K140	H1-2	K*AAGGATPK	H12_HUMAN Histone H1.2 OS=Homo sapiens OX=9606 GN=H1-2 PE=1 SV=2	3.43924
P16403_K148	H1-2	AAGGATPK*K	H12_HUMAN Histone H1.2 OS=Homo sapiens OX=9606 GN=H1-2 PE=1 SV=2	1.22538	Modified residue	Note=N6-(2-hydroxyisobutyryl)lysine;Ontology_term=ECO:0000269;evidence=ECO:0000269|PubMed:24681537;Dbxref=PMID:24681537
P16615_K464	ATP2A2	GLSK*IER	AT2A2_HUMAN Sarcoplasmic/endoplasmic reticulum calcium ATPase 2 OS=Homo sapiens OX=9606 GN=ATP2A2 PE=1 SV=1	0.514542
P16615_K650	ATP2A2	IGIFGQDEDVTSK*AFTGR	AT2A2_HUMAN Sarcoplasmic/endoplasmic reticulum calcium ATPase 2 OS=Homo sapiens OX=9606 GN=ATP2A2 PE=1 SV=1	1.42857
P16615_K683	ATP2A2	VEPSHK*SK	AT2A2_HUMAN Sarcoplasmic/endoplasmic reticulum calcium ATPase 2 OS=Homo sapiens OX=9606 GN=ATP2A2 PE=1 SV=1	0.695955
P16949_K104	STMN1	LTHK*MEANK	STMN1_HUMAN Stathmin OS=Homo sapiens OX=9606 GN=STMN1 PE=1 SV=3	0.724675
P16949_K119	STMN1	EAQMAAK*LER	STMN1_HUMAN Stathmin OS=Homo sapiens OX=9606 GN=STMN1 PE=1 SV=3	3.30028	Modified residue	Note=N6-acetyllysine;Ontology_term=ECO:0007744;evidence=ECO:0007744|PubMed:19608861;Dbxref=PMID:19608861
P16949_K128	STMN1	DK*HIEEVR	STMN1_HUMAN Stathmin OS=Homo sapiens OX=9606 GN=STMN1 PE=1 SV=3	1.48548
P16949_K42	STMN1	K*KDLSLEEIQK	STMN1_HUMAN Stathmin OS=Homo sapiens OX=9606 GN=STMN1 PE=1 SV=3	1.0989
P16949_K43	STMN1	K*DLSLEEIQK	STMN1_HUMAN Stathmin OS=Homo sapiens OX=9606 GN=STMN1 PE=1 SV=3	4.98266
P16949_K53	STMN1	K*LEAAEER	STMN1_HUMAN Stathmin OS=Homo sapiens OX=9606 GN=STMN1 PE=1 SV=3	2.94963
P16949_K62	STMN1	K*SHEAEVLK	STMN1_HUMAN Stathmin OS=Homo sapiens OX=9606 GN=STMN1 PE=1 SV=3	2.52656
P16949_K70	STMN1	SHEAEVLK*QLAEK	STMN1_HUMAN Stathmin OS=Homo sapiens OX=9606 GN=STMN1 PE=1 SV=3	5.16688
P16949_K80	STMN1	EHEK*EVLQK	STMN1_HUMAN Stathmin OS=Homo sapiens OX=9606 GN=STMN1 PE=1 SV=3	4.48232
P16949_K85	STMN1	EVLQK*AIEENNNFSK	STMN1_HUMAN Stathmin OS=Homo sapiens OX=9606 GN=STMN1 PE=1 SV=3	4.11837
P17066_K514	HSPA6	LSK*EEVER	HSP76_HUMAN Heat shock 70 kDa protein 6 OS=Homo sapiens OX=9606 GN=HSPA6 PE=1 SV=2	5.03205
P17096_K15	HMGA1	SSQPLASK*QEK	HMGA1_HUMAN High mobility group protein HMG-I/HMG-Y OS=Homo sapiens OX=9606 GN=HMGA1 PE=1 SV=3	1.50211	Modified residue$Cross-link	Note=N6-acetyllysine%3B alternate;Ontology_term=ECO:0007744;evidence=ECO:0007744|PubMed:19608861;Dbxref=PMID:19608861$Note=Glycyl lysine isopeptide (Lys-Gly) (interchain with G-Cter in SUMO2)%3B alternate;Ontology_term=ECO:0007744;evidence=ECO:0007744|PubMed:28112733;Dbxref=PMID:28112733
P17096_K46	HMGA1	KQPPVSPGTALVGSQK*EPSEVPTPK	HMGA1_HUMAN High mobility group protein HMG-I/HMG-Y OS=Homo sapiens OX=9606 GN=HMGA1 PE=1 SV=3	3.14031
P17096_K74	HMGA1	K*TTTTPGR	HMGA1_HUMAN High mobility group protein HMG-I/HMG-Y OS=Homo sapiens OX=9606 GN=HMGA1 PE=1 SV=3	0.969387
P17661_K125	DES	FANYIEK*VR	DESM_HUMAN Desmin OS=Homo sapiens OX=9606 GN=DES PE=1 SV=3	1.34069
P17812_K557	CTPS1	LSHYLQK*GCR	PYRG1_HUMAN CTP synthase 1 OS=Homo sapiens OX=9606 GN=CTPS1 PE=1 SV=2	0.47891
P17844_K236	DDX5	LIDFLECGK*TNLR	DDX5_HUMAN Probable ATP-dependent RNA helicase DDX5 OS=Homo sapiens OX=9606 GN=DDX5 PE=1 SV=1	0.68966	Modified residue	Note=N6-acetyllysine;Ontology_term=ECO:0000250;evidence=ECO:0000250|UniProtKB:Q61656
P17844_K32	DDX5	AGPLSGK*K	DDX5_HUMAN Probable ATP-dependent RNA helicase DDX5 OS=Homo sapiens OX=9606 GN=DDX5 PE=1 SV=1	0.75188	Modified residue$Cross-link	Note=N6-acetyllysine%3B alternate;Ontology_term=ECO:0007744;evidence=ECO:0007744|PubMed:19608861;Dbxref=PMID:19608861$Note=Glycyl lysine isopeptide (Lys-Gly) (interchain with G-Cter in SUMO2)%3B alternate;Ontology_term=ECO:0007744;evidence=ECO:0007744|PubMed:28112733;Dbxref=PMID:28112733
P17844_K388	DDX5	DWVLNEFK*HGK	DDX5_HUMAN Probable ATP-dependent RNA helicase DDX5 OS=Homo sapiens OX=9606 GN=DDX5 PE=1 SV=1	1.69267	Cross-link	Note=Glycyl lysine isopeptide (Lys-Gly) (interchain with G-Cter in SUMO2);Ontology_term=ECO:0007744;evidence=ECO:0007744|PubMed:28112733;Dbxref=PMID:28112733
P17844_K470	DDX5	EANQAINPK*LLQLVEDR	DDX5_HUMAN Probable ATP-dependent RNA helicase DDX5 OS=Homo sapiens OX=9606 GN=DDX5 PE=1 SV=1	3.3908	Cross-link	Note=Glycyl lysine isopeptide (Lys-Gly) (interchain with G-Cter in SUMO2);Ontology_term=ECO:0007744;evidence=ECO:0007744|PubMed:28112733;Dbxref=PMID:28112733
P17844_K523	DDX5	GYSSLLK*R	DDX5_HUMAN Probable ATP-dependent RNA helicase DDX5 OS=Homo sapiens OX=9606 GN=DDX5 PE=1 SV=1	0.89945	Cross-link	Note=Glycyl lysine isopeptide (Lys-Gly) (interchain with G-Cter in SUMO2);Ontology_term=ECO:0007744;evidence=ECO:0007744|PubMed:28112733;Dbxref=PMID:28112733
P17844_K80	DDX5	SK*EITVR	DDX5_HUMAN Probable ATP-dependent RNA helicase DDX5 OS=Homo sapiens OX=9606 GN=DDX5 PE=1 SV=1	1.02783
P17980_K245	PSMC3	ACAAQTK*ATFLK	PRS6A_HUMAN 26S proteasome regulatory subunit 6A OS=Homo sapiens OX=9606 GN=PSMC3 PE=1 SV=3	0.93458
P17987_K126	TCP1	LACK*EAVR	TCPA_HUMAN T-complex protein 1 subunit alpha OS=Homo sapiens OX=9606 GN=TCP1 PE=1 SV=1	5.26316
P17987_K400	TCP1	SLHDALCVVK*R	TCPA_HUMAN T-complex protein 1 subunit alpha OS=Homo sapiens OX=9606 GN=TCP1 PE=1 SV=1	1.03653	Modified residue	Note=N6-acetyllysine;Ontology_term=ECO:0007744;evidence=ECO:0007744|PubMed:19608861;Dbxref=PMID:19608861
P17987_K499	TCP1	DNK*QAGVFEPTIVK	TCPA_HUMAN T-complex protein 1 subunit alpha OS=Homo sapiens OX=9606 GN=TCP1 PE=1 SV=1	0.48309
P17987_K532	TCP1	IDDLIK*LHPESK	TCPA_HUMAN T-complex protein 1 subunit alpha OS=Homo sapiens OX=9606 GN=TCP1 PE=1 SV=1	0.68599
P17987_K541	TCP1	DDK*HGSYEDAVHSGALND	TCPA_HUMAN T-complex protein 1 subunit alpha OS=Homo sapiens OX=9606 GN=TCP1 PE=1 SV=1	1.03093
P18031_K323	PTPN1	ILEPHNGK*CR	PTN1_HUMAN Tyrosine-protein phosphatase non-receptor type 1 OS=Homo sapiens OX=9606 GN=PTPN1 PE=1 SV=1	1.38271
P18031_K36	PTPN1	VAK*LPK	PTN1_HUMAN Tyrosine-protein phosphatase non-receptor type 1 OS=Homo sapiens OX=9606 GN=PTPN1 PE=1 SV=1	1.1236
P18077_K29	RPL35A	EHTALLK*IEGVYAR	RL35A_HUMAN 60S ribosomal protein L35a OS=Homo sapiens OX=9606 GN=RPL35A PE=1 SV=2	9.72222
P18077_K95	RPL35A	SNLPAK*AIGHR	RL35A_HUMAN 60S ribosomal protein L35a OS=Homo sapiens OX=9606 GN=RPL35A PE=1 SV=2	3.15099
P18124_K104	RPL7	GINGVSPK*VR	RL7_HUMAN 60S ribosomal protein L7 OS=Homo sapiens OX=9606 GN=RPL7 PE=1 SV=1	7.81663
P18124_K161	RPL7	GYGK*INK	RL7_HUMAN 60S ribosomal protein L7 OS=Homo sapiens OX=9606 GN=RPL7 PE=1 SV=1	3.57545
P18124_K19	RPL7	EVPAVPETLK*K	RL7_HUMAN 60S ribosomal protein L7 OS=Homo sapiens OX=9606 GN=RPL7 PE=1 SV=1	3.89423
P18124_K29	RPL7	NFAELK*IK	RL7_HUMAN 60S ribosomal protein L7 OS=Homo sapiens OX=9606 GN=RPL7 PE=1 SV=1	7.14286
P18124_K77	RPL7	K*AGNFYVPAEPK	RL7_HUMAN 60S ribosomal protein L7 OS=Homo sapiens OX=9606 GN=RPL7 PE=1 SV=1	1.81818
P18206_K1012	VCL	GGSGTK*R	VINC_HUMAN Vinculin OS=Homo sapiens OX=9606 GN=VCL PE=1 SV=4	6.92534
P18206_K1034	VCL	LAK*EVAK	VINC_HUMAN Vinculin OS=Homo sapiens OX=9606 GN=VCL PE=1 SV=4	1.72765
P18206_K276	VCL	ALASIDSK*LNQAK	VINC_HUMAN Vinculin OS=Homo sapiens OX=9606 GN=VCL PE=1 SV=4	5.55556
P18206_K366	VCL	AQQVSQGLDVLTAK*VENAAR	VINC_HUMAN Vinculin OS=Homo sapiens OX=9606 GN=VCL PE=1 SV=4	2.50383
P18206_K453	VCL	QGK*GDSPEAR	VINC_HUMAN Vinculin OS=Homo sapiens OX=9606 GN=VCL PE=1 SV=4	0.58824
P18206_K496	VCL	AAVHLEGK*IEQAQR	VINC_HUMAN Vinculin OS=Homo sapiens OX=9606 GN=VCL PE=1 SV=4	9.45815	Modified residue	Note=N6-acetyllysine;Ontology_term=ECO:0007744;evidence=ECO:0007744|PubMed:19608861;Dbxref=PMID:19608861
P18206_K581	VCL	ALASQLQDSLK*DLK	VINC_HUMAN Vinculin OS=Homo sapiens OX=9606 GN=VCL PE=1 SV=4	1.02041
P18206_K59	VCL	VGK*ETVQTTEDQILK	VINC_HUMAN Vinculin OS=Homo sapiens OX=9606 GN=VCL PE=1 SV=4	1.1236
P18206_K639	VCL	AANFENHSGK*LGATAEK	VINC_HUMAN Vinculin OS=Homo sapiens OX=9606 GN=VCL PE=1 SV=4	4.67687
P18206_K699	VCL	NPGNQAAYEHFETMK*NQWIDNVEK	VINC_HUMAN Vinculin OS=Homo sapiens OX=9606 GN=VCL PE=1 SV=4	5.71895
P18206_K784	VCL	EAVK*AASDELSK	VINC_HUMAN Vinculin OS=Homo sapiens OX=9606 GN=VCL PE=1 SV=4	10
P18206_K830	VCL	ILGAVAK*VR	VINC_HUMAN Vinculin OS=Homo sapiens OX=9606 GN=VCL PE=1 SV=4	6.66667
P18621_K13	RPL17	YSLDPENPTK*SCK	RL17_HUMAN 60S ribosomal protein L17 OS=Homo sapiens OX=9606 GN=RPL17 PE=1 SV=3	0.45045
P18621_K27	RPL17	VHFK*NTR	RL17_HUMAN 60S ribosomal protein L17 OS=Homo sapiens OX=9606 GN=RPL17 PE=1 SV=3	1.85609
P18621_K74	RPL17	CAQAK*QWGWTQGR	RL17_HUMAN 60S ribosomal protein L17 OS=Homo sapiens OX=9606 GN=RPL17 PE=1 SV=3	0.840153
P18669_K100	PGAM1	HYGGLTGLNK*AETAAK	PGAM1_HUMAN Phosphoglycerate mutase 1 OS=Homo sapiens OX=9606 GN=PGAM1 PE=1 SV=2	2.28265
P18669_K106	PGAM1	AETAAK*HGEAQVK	PGAM1_HUMAN Phosphoglycerate mutase 1 OS=Homo sapiens OX=9606 GN=PGAM1 PE=1 SV=2	0.827218	Modified residue	Note=N6-acetyllysine;Ontology_term=ECO:0000250;evidence=ECO:0000250|UniProtKB:Q9DBJ1
P18669_K113	PGAM1	HGEAQVK*IWR	PGAM1_HUMAN Phosphoglycerate mutase 1 OS=Homo sapiens OX=9606 GN=PGAM1 PE=1 SV=2	7.58955
P18669_K138	PGAM1	SYDVPPPPMEPDHPFYSNISK*DR	PGAM1_HUMAN Phosphoglycerate mutase 1 OS=Homo sapiens OX=9606 GN=PGAM1 PE=1 SV=2	10
P18669_K228	PGAM1	NLKPIK*PMQFLGDEETVR	PGAM1_HUMAN Phosphoglycerate mutase 1 OS=Homo sapiens OX=9606 GN=PGAM1 PE=1 SV=2	4.91987
P18669_K241	PGAM1	K*AMEAVAAQGK	PGAM1_HUMAN Phosphoglycerate mutase 1 OS=Homo sapiens OX=9606 GN=PGAM1 PE=1 SV=2	4.6142
P18669_K251	PGAM1	AMEAVAAQGK*AK	PGAM1_HUMAN Phosphoglycerate mutase 1 OS=Homo sapiens OX=9606 GN=PGAM1 PE=1 SV=2	4.42646	Modified residue	Note=N6-acetyllysine%3B alternate;Ontology_term=ECO:0000269;evidence=ECO:0000269|PubMed:22157007;Dbxref=PMID:22157007
P18669_K39	PGAM1	FSGWYDADLSPAGHEEAK*R	PGAM1_HUMAN Phosphoglycerate mutase 1 OS=Homo sapiens OX=9606 GN=PGAM1 PE=1 SV=2	8.76061
P18859_K46	ATP5PF	LFVDK*IR	ATP5J_HUMAN ATP synthase-coupling factor 6, mitochondrial OS=Homo sapiens OX=9606 GN=ATP5PF PE=1 SV=1	0.995847	Modified residue	Note=N6-acetyllysine;Ontology_term=ECO:0007744;evidence=ECO:0007744|PubMed:19608861;Dbxref=PMID:19608861
P19105_K149	MYL12A	EAPIDK*K	ML12A_HUMAN Myosin regulatory light chain 12A OS=Homo sapiens OX=9606 GN=MYL12A PE=1 SV=2	2.0005
P19105_K150	MYL12A	K*GNFNYIEFTR	ML12A_HUMAN Myosin regulatory light chain 12A OS=Homo sapiens OX=9606 GN=MYL12A PE=1 SV=2	5.88235
P19105_K163	MYL12A	ILK*HGAK	ML12A_HUMAN Myosin regulatory light chain 12A OS=Homo sapiens OX=9606 GN=MYL12A PE=1 SV=2	2.61628
P19338_K116	NCL	GATPGK*ALVATPGK	NUCL_HUMAN Nucleolin OS=Homo sapiens OX=9606 GN=NCL PE=1 SV=3	7.73809	Modified residue	Note=N6-acetyllysine;Ontology_term=ECO:0007744;evidence=ECO:0007744|PubMed:19608861;Dbxref=PMID:19608861
P19338_K124	NCL	ALVATPGK*K	NUCL_HUMAN Nucleolin OS=Homo sapiens OX=9606 GN=NCL PE=1 SV=3	5	Modified residue	Note=N6-acetyllysine;Ontology_term=ECO:0007744;evidence=ECO:0007744|PubMed:19608861;Dbxref=PMID:19608861
P19338_K223	NCL	AAK*VVPVK	NUCL_HUMAN Nucleolin OS=Homo sapiens OX=9606 GN=NCL PE=1 SV=3	8.88279
P19338_K398	NCL	TLLAK*NLPYK	NUCL_HUMAN Nucleolin OS=Homo sapiens OX=9606 GN=NCL PE=1 SV=3	3.08471	Modified residue	Note=N6-acetyllysine;Ontology_term=ECO:0007744;evidence=ECO:0007744|PubMed:19608861;Dbxref=PMID:19608861
P19338_K424	NCL	LVSK*DGK	NUCL_HUMAN Nucleolin OS=Homo sapiens OX=9606 GN=NCL PE=1 SV=3	2.91403
P19338_K477	NCL	GGK*NSTWSGESK	NUCL_HUMAN Nucleolin OS=Homo sapiens OX=9606 GN=NCL PE=1 SV=3	5.88235	Modified residue	Note=N6-acetyllysine;Ontology_term=ECO:0000250;evidence=ECO:0000250|UniProtKB:P09405
P19338_K577	NCL	TLFVK*GLSEDTTEETLK	NUCL_HUMAN Nucleolin OS=Homo sapiens OX=9606 GN=NCL PE=1 SV=3	5	Modified residue$Cross-link	Note=N6-acetyllysine%3B alternate;Ontology_term=ECO:0007744;evidence=ECO:0007744|PubMed:19608861;Dbxref=PMID:19608861$Note=Glycyl lysine isopeptide (Lys-Gly) (interchain with G-Cter in SUMO2)%3B alternate;Ontology_term=ECO:0007744;evidence=ECO:0007744|PubMed:28112733;Dbxref=PMID:28112733
P19338_K624	NCL	GFGFVDFNSEEDAK*AAK	NUCL_HUMAN Nucleolin OS=Homo sapiens OX=9606 GN=NCL PE=1 SV=3	1.08696	Cross-link	Note=Glycyl lysine isopeptide (Lys-Gly) (interchain with G-Cter in SUMO2);Ontology_term=ECO:0007744;evidence=ECO:0007744|PubMed:28112733;Dbxref=PMID:28112733
P19338_K80	NCL	K*AAVTPGK	NUCL_HUMAN Nucleolin OS=Homo sapiens OX=9606 GN=NCL PE=1 SV=3	5.26316
P19338_K9	NCL	AGK*NQGDPK	NUCL_HUMAN Nucleolin OS=Homo sapiens OX=9606 GN=NCL PE=1 SV=3	1.11111	Modified residue	Note=N6-acetyllysine;Ontology_term=ECO:0007744;evidence=ECO:0007744|PubMed:19608861;Dbxref=PMID:19608861
P19367_K429	HK1	FHK*TLR	HXK1_HUMAN Hexokinase-1 OS=Homo sapiens OX=9606 GN=HK1 PE=1 SV=3	9.09091
P19367_K777	HK1	GQISETLK*TR	HXK1_HUMAN Hexokinase-1 OS=Homo sapiens OX=9606 GN=HK1 PE=1 SV=3	1.08696
P19440_K52	GGT1	AAVAADAKQCSK*	GGT1_HUMAN Glutathione hydrolase 1 proenzyme OS=Homo sapiens OX=9606 GN=GGT1 PE=1 SV=2	0.83333	Disulfide bond	Ontology_term=ECO:0000269;evidence=ECO:0000269|PubMed:24047895;Dbxref=PMID:24047895
P19623_K134	SRM	IQVSK*K	SPEE_HUMAN Spermidine synthase OS=Homo sapiens OX=9606 GN=SRM PE=1 SV=1	0.07669
P20290_K171	BTF3	LAEALPK*QSVDGK	BTF3_HUMAN Transcription factor BTF3 OS=Homo sapiens OX=9606 GN=BTF3 PE=1 SV=1	4.03456
P20645_K50	M6PR	ELALVK*R	MPRD_HUMAN Cation-dependent mannose-6-phosphate receptor OS=Homo sapiens OX=9606 GN=M6PR PE=1 SV=1	9.09091	Disulfide bond	Ontology_term=ECO:0000255;evidence=ECO:0000255|PROSITE-ProRule:PRU01262
P20674_K113	COX5A	ILEVVK*DK	COX5A_HUMAN Cytochrome c oxidase subunit 5A, mitochondrial OS=Homo sapiens OX=9606 GN=COX5A PE=1 SV=2	5.6746	Modified residue	Note=N6-acetyllysine;Ontology_term=ECO:0000250;evidence=ECO:0000250|UniProtKB:P12787
P20700_K474	LMNB1	K*IGDTSVSYK	LMNB1_HUMAN Lamin-B1 OS=Homo sapiens OX=9606 GN=LMNB1 PE=1 SV=2	1.49254
P20700_K528	LMNB1	NQNSWGTGEDVK*VILK	LMNB1_HUMAN Lamin-B1 OS=Homo sapiens OX=9606 GN=LMNB1 PE=1 SV=2	5.88235
P20810_K324	CAST	AKEEK*LEK	ICAL_HUMAN Calpastatin OS=Homo sapiens OX=9606 GN=CAST PE=1 SV=4	0.454135
P20810_K384	CAST	EK*PSKPTEK	ICAL_HUMAN Calpastatin OS=Homo sapiens OX=9606 GN=CAST PE=1 SV=4	0.463545
P20810_K443	CAST	GTVPDDAVEALADSLGK*K	ICAL_HUMAN Calpastatin OS=Homo sapiens OX=9606 GN=CAST PE=1 SV=4	0.28653
P20810_K678	CAST	K*AASSSK	ICAL_HUMAN Calpastatin OS=Homo sapiens OX=9606 GN=CAST PE=1 SV=4	0.38113
P20810_K684	CAST	AASSSK*APK	ICAL_HUMAN Calpastatin OS=Homo sapiens OX=9606 GN=CAST PE=1 SV=4	6.13695
P21127_K719	CDK11B	ISAEDGLK*HEYFR	CD11B_HUMAN Cyclin-dependent kinase 11B OS=Homo sapiens OX=9606 GN=CDK11B PE=1 SV=4	5.15879
P21333_K1071	FLNA	VK*AFGPGLQGGSAGSPAR	FLNA_HUMAN Filamin-A OS=Homo sapiens OX=9606 GN=FLNA PE=1 SV=4	3.8646	Modified residue	Note=N6-acetyllysine%3B alternate;Ontology_term=ECO:0000250;evidence=ECO:0000250|UniProtKB:Q8BTM8
P21333_K1162	FLNA	AHVVPCFDASK*VK	FLNA_HUMAN Filamin-A OS=Homo sapiens OX=9606 GN=FLNA PE=1 SV=4	1.2987
P21333_K1294	FLNA	ALTQTGGPHVK*AR	FLNA_HUMAN Filamin-A OS=Homo sapiens OX=9606 GN=FLNA PE=1 SV=4	2.26201
P21333_K1372	FLNA	VHGPGIQSGTTNK*PNK	FLNA_HUMAN Filamin-A OS=Homo sapiens OX=9606 GN=FLNA PE=1 SV=4	6.25	Modified residue	Note=N6-acetyllysine;Ontology_term=ECO:0000250;evidence=ECO:0000250|UniProtKB:Q8BTM8
P21333_K1450	FLNA	VPVHDVTDASK*VK	FLNA_HUMAN Filamin-A OS=Homo sapiens OX=9606 GN=FLNA PE=1 SV=4	1.52631
P21333_K1486	FLNA	AGVAPLQVK*VQGPK	FLNA_HUMAN Filamin-A OS=Homo sapiens OX=9606 GN=FLNA PE=1 SV=4	3.7443
P21333_K1538	FLNA	VK*VLPTHDASK	FLNA_HUMAN Filamin-A OS=Homo sapiens OX=9606 GN=FLNA PE=1 SV=4	1.41483	Modified residue	Note=N6-acetyllysine;Ontology_term=ECO:0000250;evidence=ECO:0000250|UniProtKB:Q8BTM8
P21333_K1590	FLNA	DAGEGLLAVQITDPEGK*PK	FLNA_HUMAN Filamin-A OS=Homo sapiens OX=9606 GN=FLNA PE=1 SV=4	5.55556
P21333_K1814	FLNA	MPSGK*VAQPTITDNK	FLNA_HUMAN Filamin-A OS=Homo sapiens OX=9606 GN=FLNA PE=1 SV=4	8.33333
P21333_K1824	FLNA	VAQPTITDNK*DGTVTVR	FLNA_HUMAN Filamin-A OS=Homo sapiens OX=9606 GN=FLNA PE=1 SV=4	5
P21333_K2024	FLNA	ETGEHLVHVK*K	FLNA_HUMAN Filamin-A OS=Homo sapiens OX=9606 GN=FLNA PE=1 SV=4	3.8197
P21333_K2417	FLNA	FNGTHIPGSPFK*IR	FLNA_HUMAN Filamin-A OS=Homo sapiens OX=9606 GN=FLNA PE=1 SV=4	1.38889
P21333_K2540	FLNA	LVSNHSLHETSSVFVDSLTK*ATCAPQHGAPGPGPADASK	FLNA_HUMAN Filamin-A OS=Homo sapiens OX=9606 GN=FLNA PE=1 SV=4	1.5873
P21333_K2607	FLNA	TPCEEILVK*HVGSR	FLNA_HUMAN Filamin-A OS=Homo sapiens OX=9606 GN=FLNA PE=1 SV=4	1.19048	Modified residue	Note=N6-acetyllysine;Ontology_term=ECO:0007744;evidence=ECO:0007744|PubMed:19608861;Dbxref=PMID:19608861
P21333_K299	FLNA	AYGPGIEPTGNMVK*K	FLNA_HUMAN Filamin-A OS=Homo sapiens OX=9606 GN=FLNA PE=1 SV=4	5.55556	Cross-link	Note=Glycyl lysine isopeptide (Lys-Gly) (interchain with G-Cter in SUMO1)%3B alternate;Ontology_term=ECO:0007744;evidence=ECO:0007744|PubMed:25114211;Dbxref=PMID:25114211
P21333_K338	FLNA	VTANNDK*NR	FLNA_HUMAN Filamin-A OS=Homo sapiens OX=9606 GN=FLNA PE=1 SV=4	2.85983
P21333_K498	FLNA	VK*ETADFK	FLNA_HUMAN Filamin-A OS=Homo sapiens OX=9606 GN=FLNA PE=1 SV=4	0.80645
P21333_K504	FLNA	ETADFK*VYTK	FLNA_HUMAN Filamin-A OS=Homo sapiens OX=9606 GN=FLNA PE=1 SV=4	1.05263
P21333_K508	FLNA	VYTK*GAGSGELK	FLNA_HUMAN Filamin-A OS=Homo sapiens OX=9606 GN=FLNA PE=1 SV=4	1.0274	Modified residue	Note=N6-acetyllysine;Ontology_term=ECO:0007744;evidence=ECO:0007744|PubMed:19608861;Dbxref=PMID:19608861
P21333_K523	FLNA	GPK*GEER	FLNA_HUMAN Filamin-A OS=Homo sapiens OX=9606 GN=FLNA PE=1 SV=4	0.77519
P21333_K569	FLNA	SPFEVK*VGTECGNQK	FLNA_HUMAN Filamin-A OS=Homo sapiens OX=9606 GN=FLNA PE=1 SV=4	1.13636
P21333_K578	FLNA	VGTECGNQK*VR	FLNA_HUMAN Filamin-A OS=Homo sapiens OX=9606 GN=FLNA PE=1 SV=4	0.661616
P21333_K691	FLNA	TGVAVNK*PAEFTVDAK	FLNA_HUMAN Filamin-A OS=Homo sapiens OX=9606 GN=FLNA PE=1 SV=4	0.96154
P21333_K700	FLNA	TGVAVNKPAEFTVDAK*HGGK	FLNA_HUMAN Filamin-A OS=Homo sapiens OX=9606 GN=FLNA PE=1 SV=4	1.41604	Modified residue	Note=N6-acetyllysine;Ontology_term=ECO:0007744;evidence=ECO:0007744|PubMed:19608861;Dbxref=PMID:19608861
P21333_K771	FLNA	VNVGAGSHPNK*VK	FLNA_HUMAN Filamin-A OS=Homo sapiens OX=9606 GN=FLNA PE=1 SV=4	1.34429
P21333_K781	FLNA	VYGPGVAK*TGLK	FLNA_HUMAN Filamin-A OS=Homo sapiens OX=9606 GN=FLNA PE=1 SV=4	2.26349	Modified residue	Note=N6-acetyllysine;Ontology_term=ECO:0007744;evidence=ECO:0007744|PubMed:19608861;Dbxref=PMID:19608861
P21333_K837	FLNA	NDNDTFTVK*YTPR	FLNA_HUMAN Filamin-A OS=Homo sapiens OX=9606 GN=FLNA PE=1 SV=4	3.2009	Modified residue	Note=N6-acetyllysine;Ontology_term=ECO:0007744;evidence=ECO:0007744|PubMed:19608861;Dbxref=PMID:19608861
P21333_K865	FLNA	VK*VEPSHDASK	FLNA_HUMAN Filamin-A OS=Homo sapiens OX=9606 GN=FLNA PE=1 SV=4	1.37452	Modified residue	Note=N6-acetyllysine;Ontology_term=ECO:0000250;evidence=ECO:0000250|UniProtKB:Q8BTM8
P21333_K876	FLNA	VK*AEGPGLSR	FLNA_HUMAN Filamin-A OS=Homo sapiens OX=9606 GN=FLNA PE=1 SV=4	4.38172
P21333_K891	FLNA	TGVELGK*PTHFTVNAK	FLNA_HUMAN Filamin-A OS=Homo sapiens OX=9606 GN=FLNA PE=1 SV=4	8.69709
P21333_K994	FLNA	VDVGKDQEFTVK*SK	FLNA_HUMAN Filamin-A OS=Homo sapiens OX=9606 GN=FLNA PE=1 SV=4	3.50935
P21399_K379	ACO1	RPQDK*VAVSDMK	ACOC_HUMAN Cytoplasmic aconitate hydratase OS=Homo sapiens OX=9606 GN=ACO1 PE=1 SV=3	0.360042
P21589_K67	NT5E	LFTK*VQQIR	5NTD_HUMAN 5'-nucleotidase OS=Homo sapiens OX=9606 GN=NT5E PE=1 SV=1	1.06376
P21796_K274	VDAC1	NVNAGGHK*LGLGLEFQA	VDAC1_HUMAN Voltage-dependent anion-selective channel protein 1 OS=Homo sapiens OX=9606 GN=VDAC1 PE=1 SV=2	3.89423	Cross-link	Note=Glycyl lysine isopeptide (Lys-Gly) (interchain with G-Cter in ubiquitin);Ontology_term=ECO:0000269,ECO:0000269;evidence=ECO:0000269|PubMed:25621951,ECO:0000269|PubMed:32047033;Dbxref=PMID:25621951,PMID:32047033
P21796_K61	VDAC1	VTGSLETK*YR	VDAC1_HUMAN Voltage-dependent anion-selective channel protein 1 OS=Homo sapiens OX=9606 GN=VDAC1 PE=1 SV=2	2.50767	Cross-link	Note=Glycyl lysine isopeptide (Lys-Gly) (interchain with G-Cter in ubiquitin);Ontology_term=ECO:0000269;evidence=ECO:0000269|PubMed:25621951;Dbxref=PMID:25621951
P21980_K380	TGM2	AIK*EGDLSTK	TGM2_HUMAN Protein-glutamine gamma-glutamyltransferase 2 OS=Homo sapiens OX=9606 GN=TGM2 PE=1 SV=2	4.31162
P21980_K444	TGM2	EDITHTYK*YPEGSSEER	TGM2_HUMAN Protein-glutamine gamma-glutamyltransferase 2 OS=Homo sapiens OX=9606 GN=TGM2 PE=1 SV=2	2.03007
P21980_K464	TGM2	ANHLNK*LAEK	TGM2_HUMAN Protein-glutamine gamma-glutamyltransferase 2 OS=Homo sapiens OX=9606 GN=TGM2 PE=1 SV=2	5.93342
P21980_K468	TGM2	LAEK*EETGMAMR	TGM2_HUMAN Protein-glutamine gamma-glutamyltransferase 2 OS=Homo sapiens OX=9606 GN=TGM2 PE=1 SV=2	10	Modified residue	Note=N6-acetyllysine;Ontology_term=ECO:0000250;evidence=ECO:0000250|UniProtKB:P21981
P21980_K562	TGM2	DCLTESNLIK*VR	TGM2_HUMAN Protein-glutamine gamma-glutamyltransferase 2 OS=Homo sapiens OX=9606 GN=TGM2 PE=1 SV=2	0.93458
P21980_K590	TGM2	DLYLENPEIK*IR	TGM2_HUMAN Protein-glutamine gamma-glutamyltransferase 2 OS=Homo sapiens OX=9606 GN=TGM2 PE=1 SV=2	7.17949
P21980_K598	TGM2	ILGEPK*QK	TGM2_HUMAN Protein-glutamine gamma-glutamyltransferase 2 OS=Homo sapiens OX=9606 GN=TGM2 PE=1 SV=2	10
P21980_K677	TGM2	AVK*GFR	TGM2_HUMAN Protein-glutamine gamma-glutamyltransferase 2 OS=Homo sapiens OX=9606 GN=TGM2 PE=1 SV=2	4.06311
P22087_K102	FBL	GK*EDALVTK	FBRL_HUMAN rRNA 2'-O-methyltransferase fibrillarin OS=Homo sapiens OX=9606 GN=FBL PE=1 SV=2	1.13636	Modified residue$Cross-link	Note=N6-acetyllysine;Ontology_term=ECO:0000269;evidence=ECO:0000269|PubMed:30540930;Dbxref=PMID:30540930$Note=Glycyl lysine isopeptide (Lys-Gly) (interchain with G-Cter in SUMO2);Ontology_term=ECO:0007744;evidence=ECO:0007744|PubMed:28112733;Dbxref=PMID:28112733
P22087_K205	FBL	DLINLAK*K	FBRL_HUMAN rRNA 2'-O-methyltransferase fibrillarin OS=Homo sapiens OX=9606 GN=FBL PE=1 SV=2	0.74337	Modified residue	Note=N6-acetyllysine;Ontology_term=ECO:0000269;evidence=ECO:0000269|PubMed:30540930;Dbxref=PMID:30540930
P22102_K251	GART	IK*DTVLQR	PUR2_HUMAN Trifunctional purine biosynthetic protein adenosine-3 OS=Homo sapiens OX=9606 GN=GART PE=1 SV=1	1.51515
P22102_K598	GART	DQK*LPHLER	PUR2_HUMAN Trifunctional purine biosynthetic protein adenosine-3 OS=Homo sapiens OX=9606 GN=GART PE=1 SV=1	4.12986
P22234_K110	PAICS	IATGSFLK*R	PUR6_HUMAN Multifunctional protein ADE2 OS=Homo sapiens OX=9606 GN=PAICS PE=1 SV=3	0.64516
P22234_K304	PAICS	VTSAHK*GPDETLR	PUR6_HUMAN Multifunctional protein ADE2 OS=Homo sapiens OX=9606 GN=PAICS PE=1 SV=3	4.29486
P22234_K36	PAICS	VLLQSK*DQITAGNAAR	PUR6_HUMAN Multifunctional protein ADE2 OS=Homo sapiens OX=9606 GN=PAICS PE=1 SV=3	6.66667	Modified residue	Note=N6-acetyllysine;Ontology_term=ECO:0000250;evidence=ECO:0000250|UniProtKB:Q9DCL9
P22307_K443	SCP2	K*LEEEGEQFVK	NLTP_HUMAN Non-specific lipid-transfer protein OS=Homo sapiens OX=9606 GN=SCP2 PE=1 SV=2	0.668233	Modified residue	Note=N6-acetyllysine%3B alternate;Ontology_term=ECO:0000250;evidence=ECO:0000250|UniProtKB:P32020
P22314_K528	UBA1	LK*SDTAAAAVR	UBA1_HUMAN Ubiquitin-like modifier-activating enzyme 1 OS=Homo sapiens OX=9606 GN=UBA1 PE=1 SV=3	10	Modified residue	Note=N6-succinyllysine;Ontology_term=ECO:0000250;evidence=ECO:0000250|UniProtKB:Q02053
P22314_K671	UBA1	QPAENVNQYLTDPK*FVER	UBA1_HUMAN Ubiquitin-like modifier-activating enzyme 1 OS=Homo sapiens OX=9606 GN=UBA1 PE=1 SV=3	3.09372	Modified residue	Note=N6-acetyllysine;Ontology_term=ECO:0007744;evidence=ECO:0007744|PubMed:19608861;Dbxref=PMID:19608861
P22314_K68	UBA1	QLYVLGHEAMK*R	UBA1_HUMAN Ubiquitin-like modifier-activating enzyme 1 OS=Homo sapiens OX=9606 GN=UBA1 PE=1 SV=3	4.67791
P22392_K124	NME2	NIIHGSDSVK*SAEK	NDKB_HUMAN Nucleoside diphosphate kinase B OS=Homo sapiens OX=9606 GN=NME2 PE=1 SV=1	2.91818
P22392_K49	NME2	ASEEHLK*QHYIDLK	NDKB_HUMAN Nucleoside diphosphate kinase B OS=Homo sapiens OX=9606 GN=NME2 PE=1 SV=1	6.22472
P22626_K104	HNRNPA2B1	EESGK*PGAHVTVK	ROA2_HUMAN Heterogeneous nuclear ribonucleoproteins A2/B1 OS=Homo sapiens OX=9606 GN=HNRNPA2B1 PE=1 SV=2	1.03369	Modified residue$Cross-link	Note=N6%2CN6-dimethyllysine%3B alternate;Ontology_term=ECO:0000269;evidence=ECO:0000269|Ref.6$Note=Glycyl lysine isopeptide (Lys-Gly) (interchain with G-Cter in SUMO2)%3B alternate;Ontology_term=ECO:0007744;evidence=ECO:0007744|PubMed:28112733;Dbxref=PMID:28112733
P22626_K17	HNRNPA2B1	EK*EQFR	ROA2_HUMAN Heterogeneous nuclear ribonucleoproteins A2/B1 OS=Homo sapiens OX=9606 GN=HNRNPA2B1 PE=1 SV=2	1.58051
P22626_K59	HNRNPA2B1	DPASK*R	ROA2_HUMAN Heterogeneous nuclear ribonucleoproteins A2/B1 OS=Homo sapiens OX=9606 GN=HNRNPA2B1 PE=1 SV=2	2.0825
P23074_K124	pol	EQK*ELLQK	POL_SFV1 Pro-Pol polyprotein OS=Simian foamy virus type 1 OX=338478 GN=pol PE=1 SV=3	0.26136
P23193_K199	TCEA1	ISNLK*DAK	TCEA1_HUMAN Transcription elongation factor A protein 1 OS=Homo sapiens OX=9606 GN=TCEA1 PE=1 SV=2	0.44643
P23246_K319	SFPQ	LFAK*YGEPGEVFINK	SFPQ_HUMAN Splicing factor, proline- and glutamine-rich OS=Homo sapiens OX=9606 GN=SFPQ PE=1 SV=2	5.26316	Modified residue	Note=N6-acetyllysine;Ontology_term=ECO:0007744;evidence=ECO:0007744|PubMed:19608861;Dbxref=PMID:19608861
P23246_K413	SFPQ	STGK*GIVEFASK	SFPQ_HUMAN Splicing factor, proline- and glutamine-rich OS=Homo sapiens OX=9606 GN=SFPQ PE=1 SV=2	1.04167
P23246_K421	SFPQ	GIVEFASK*PAAR	SFPQ_HUMAN Splicing factor, proline- and glutamine-rich OS=Homo sapiens OX=9606 GN=SFPQ PE=1 SV=2	1.94299	Modified residue	Note=N6-acetyllysine;Ontology_term=ECO:0007744;evidence=ECO:0007744|PubMed:19608861;Dbxref=PMID:19608861
P23284_K116	PPIB	GDGTGGK*SIYGER	PPIB_HUMAN Peptidyl-prolyl cis-trans isomerase B OS=Homo sapiens OX=9606 GN=PPIB PE=1 SV=2	1.67503
P23284_K165	PPIB	TAWLDGK*HVVFGK	PPIB_HUMAN Peptidyl-prolyl cis-trans isomerase B OS=Homo sapiens OX=9606 GN=PPIB PE=1 SV=2	3.95833	Modified residue	Note=N6-acetyllysine;Ontology_term=ECO:0000250;evidence=ECO:0000250|UniProtKB:Q99KR7
P23284_K186	PPIB	KVESTK*TDSR	PPIB_HUMAN Peptidyl-prolyl cis-trans isomerase B OS=Homo sapiens OX=9606 GN=PPIB PE=1 SV=2	1.46722
P23284_K209	PPIB	IEVEK*PFAIAK	PPIB_HUMAN Peptidyl-prolyl cis-trans isomerase B OS=Homo sapiens OX=9606 GN=PPIB PE=1 SV=2	0.92593	Modified residue	Note=N6-acetyllysine%3B alternate;Ontology_term=ECO:0000250;evidence=ECO:0000250|UniProtKB:P24369
P23284_K215	PPIB	IEVEKPFAIAK*E	PPIB_HUMAN Peptidyl-prolyl cis-trans isomerase B OS=Homo sapiens OX=9606 GN=PPIB PE=1 SV=2	2.56343
P23381_K111	WARS1	FGSSK*IDK	SYWC_HUMAN Tryptophan--tRNA ligase, cytoplasmic OS=Homo sapiens OX=9606 GN=WARS1 PE=1 SV=2	1.44928
P23396_K10	RPS3	K*FVADGIFK	RS3_HUMAN 40S ribosomal protein S3 OS=Homo sapiens OX=9606 GN=RPS3 PE=1 SV=2	1.27883
P23396_K201	RPS3	IGPK*KPLPDHVSIVEPK	RS3_HUMAN 40S ribosomal protein S3 OS=Homo sapiens OX=9606 GN=RPS3 PE=1 SV=2	1.02718
P23396_K202	RPS3	IGPKK*PLPDHVSIVEPK	RS3_HUMAN 40S ribosomal protein S3 OS=Homo sapiens OX=9606 GN=RPS3 PE=1 SV=2	0.9009	Cross-link	Note=Glycyl lysine isopeptide (Lys-Gly) (interchain with G-Cter in ubiquitin)
P23396_K62	RPS3	TQNVLGEK*GR	RS3_HUMAN 40S ribosomal protein S3 OS=Homo sapiens OX=9606 GN=RPS3 PE=1 SV=2	2.84894	Modified residue	Note=N6-acetyllysine;Ontology_term=ECO:0007744;evidence=ECO:0007744|PubMed:19608861;Dbxref=PMID:19608861
P23396_K75	RPS3	ELTAVVQK*R	RS3_HUMAN 40S ribosomal protein S3 OS=Homo sapiens OX=9606 GN=RPS3 PE=1 SV=2	4.80979
P23526_K408	AHCY	LTK*LTEK	SAHH_HUMAN Adenosylhomocysteinase OS=Homo sapiens OX=9606 GN=AHCY PE=1 SV=4	0.63654
P23528_K132	CFL1	LTGIK*HELQANCYEEVKDR	COF1_HUMAN Cofilin-1 OS=Homo sapiens OX=9606 GN=CFL1 PE=1 SV=3	0.890625	Cross-link	Note=Glycyl lysine isopeptide (Lys-Gly) (interchain with G-Cter in SUMO2);Ontology_term=ECO:0007744;evidence=ECO:0007744|PubMed:28112733;Dbxref=PMID:28112733
P23528_K144	CFL1	HELQANCYEEVK*DR	COF1_HUMAN Cofilin-1 OS=Homo sapiens OX=9606 GN=CFL1 PE=1 SV=3	0.767233	Modified residue	Note=N6-acetyllysine;Ontology_term=ECO:0007744;evidence=ECO:0007744|PubMed:19608861;Dbxref=PMID:19608861
P23528_K19	CFL1	VFNDMK*VR	COF1_HUMAN Cofilin-1 OS=Homo sapiens OX=9606 GN=CFL1 PE=1 SV=3	5.94188
P23528_K22	CFL1	K*SSTPEEVK	COF1_HUMAN Cofilin-1 OS=Homo sapiens OX=9606 GN=CFL1 PE=1 SV=3	1.00521
P23528_K30	CFL1	SSTPEEVK*K	COF1_HUMAN Cofilin-1 OS=Homo sapiens OX=9606 GN=CFL1 PE=1 SV=3	1.34023
P23528_K44	CFL1	AVLFCLSEDK*K	COF1_HUMAN Cofilin-1 OS=Homo sapiens OX=9606 GN=CFL1 PE=1 SV=3	1.05857
P23528_K78	CFL1	MLPDK*DCR	COF1_HUMAN Cofilin-1 OS=Homo sapiens OX=9606 GN=CFL1 PE=1 SV=3	9.3682
P23528_K92	CFL1	YALYDATYETK*ESK	COF1_HUMAN Cofilin-1 OS=Homo sapiens OX=9606 GN=CFL1 PE=1 SV=3	1.20482
P23919_K19	DTYMK	AGK*STQSR	KTHY_HUMAN Thymidylate kinase OS=Homo sapiens OX=9606 GN=DTYMK PE=1 SV=4	0.93458
P23919_K212	DTYMK	TATEKPLGELWK*	KTHY_HUMAN Thymidylate kinase OS=Homo sapiens OX=9606 GN=DTYMK PE=1 SV=4	0.68533
P24043_K2125	LAMA2	K*NISEIK	LAMA2_HUMAN Laminin subunit alpha-2 OS=Homo sapiens OX=9606 GN=LAMA2 PE=1 SV=4	0.09911
P24311_K75	COX7B	VTPK*EWR	COX7B_HUMAN Cytochrome c oxidase subunit 7B, mitochondrial OS=Homo sapiens OX=9606 GN=COX7B PE=1 SV=2	4.95529
P24534_K129	EEF1B2	LAQYESK*K	EF1B_HUMAN Elongation factor 1-beta OS=Homo sapiens OX=9606 GN=EEF1B2 PE=1 SV=3	1.48545
P24534_K66	EEF1B2	EK*ASLPGVK	EF1B_HUMAN Elongation factor 1-beta OS=Homo sapiens OX=9606 GN=EEF1B2 PE=1 SV=3	1.08566
P24539_K53	ATP5PB	PVPPLPEYGGK*VR	AT5F1_HUMAN ATP synthase F(0) complex subunit B1, mitochondrial OS=Homo sapiens OX=9606 GN=ATP5PB PE=1 SV=2	0.9901
P24666_K156	ACP1	AFLEK*AH	PPAC_HUMAN Low molecular weight phosphotyrosine protein phosphatase OS=Homo sapiens OX=9606 GN=ACP1 PE=1 SV=3	7.1127
P24752_K263	ACAT1	VDFSK*VPK	THIL_HUMAN Acetyl-CoA acetyltransferase, mitochondrial OS=Homo sapiens OX=9606 GN=ACAT1 PE=1 SV=1	0.73429	Modified residue	Note=N6-acetyllysine%3B alternate;Ontology_term=ECO:0007744;evidence=ECO:0007744|PubMed:19608861;Dbxref=PMID:19608861
P25391_K493	LAMA1	PGFYNLK*EK	LAMA1_HUMAN Laminin subunit alpha-1 OS=Homo sapiens OX=9606 GN=LAMA1 PE=1 SV=2	2.08333	Disulfide bond	Ontology_term=ECO:0000255;evidence=ECO:0000255|PROSITE-ProRule:PRU00460
P25398_K116	RPS12	DYGK*ESQAK	RS12_HUMAN 40S ribosomal protein S12 OS=Homo sapiens OX=9606 GN=RPS12 PE=1 SV=3	1.14456
P25440_K661	BRD2	LPGEK*LGR	BRD2_HUMAN Bromodomain-containing protein 2 OS=Homo sapiens OX=9606 GN=BRD2 PE=1 SV=2	0.562726
P25685_K21	DNAJB1	GASDEEIK*R	DNJB1_HUMAN DnaJ homolog subfamily B member 1 OS=Homo sapiens OX=9606 GN=DNAJB1 PE=1 SV=4	0.77519
P25705_K123	ATP5F1A	GMSLNLEPDNVGVVVFGNDK*LIK	ATPA_HUMAN ATP synthase subunit alpha, mitochondrial OS=Homo sapiens OX=9606 GN=ATP5F1A PE=1 SV=1	5	Modified residue	Note=N6-acetyllysine;Ontology_term=ECO:0000250;evidence=ECO:0000250|UniProtKB:Q03265
P25705_K132	ATP5F1A	EGDIVK*R	ATPA_HUMAN ATP synthase subunit alpha, mitochondrial OS=Homo sapiens OX=9606 GN=ATP5F1A PE=1 SV=1	1.21951	Modified residue	Note=N6-acetyllysine;Ontology_term=ECO:0000250;evidence=ECO:0000250|UniProtKB:Q03265
P25705_K161	ATP5F1A	VVDALGNAIDGK*GPIGSK	ATPA_HUMAN ATP synthase subunit alpha, mitochondrial OS=Homo sapiens OX=9606 GN=ATP5F1A PE=1 SV=1	7.80303	Modified residue	Note=N6-acetyllysine%3B alternate;Ontology_term=ECO:0007744;evidence=ECO:0007744|PubMed:19608861;Dbxref=PMID:19608861
P25705_K167	ATP5F1A	GPIGSK*TR	ATPA_HUMAN ATP synthase subunit alpha, mitochondrial OS=Homo sapiens OX=9606 GN=ATP5F1A PE=1 SV=1	1.04273	Modified residue	Note=N6-acetyllysine%3B alternate;Ontology_term=ECO:0000250;evidence=ECO:0000250|UniProtKB:Q03265
P25705_K175	ATP5F1A	VGLK*APGIIPR	ATPA_HUMAN ATP synthase subunit alpha, mitochondrial OS=Homo sapiens OX=9606 GN=ATP5F1A PE=1 SV=1	0.714393
P25705_K539	ATP5F1A	ISEQSDAK*LK	ATPA_HUMAN ATP synthase subunit alpha, mitochondrial OS=Homo sapiens OX=9606 GN=ATP5F1A PE=1 SV=1	1.03987	Modified residue	Note=N6-acetyllysine%3B alternate;Ontology_term=ECO:0007744;evidence=ECO:0007744|PubMed:19608861;Dbxref=PMID:19608861
P25787_K171	PSMA2	NYVNGK*TFLEK	PSA2_HUMAN Proteasome subunit alpha type-2 OS=Homo sapiens OX=9606 GN=PSMA2 PE=1 SV=2	1.36986	Modified residue	Note=N6-acetyllysine;Ontology_term=ECO:0007744;evidence=ECO:0007744|PubMed:19608861;Dbxref=PMID:19608861
P25787_K53	PSMA2	QK*SILYDER	PSA2_HUMAN Proteasome subunit alpha type-2 OS=Homo sapiens OX=9606 GN=PSMA2 PE=1 SV=2	0.89286
P25788_K192	PSMA3	DIVK*EVAK	PSA3_HUMAN Proteasome subunit alpha type-3 OS=Homo sapiens OX=9606 GN=PSMA3 PE=1 SV=2	1.78571
P25788_K65	PSMA3	LYEEGSNK*R	PSA3_HUMAN Proteasome subunit alpha type-3 OS=Homo sapiens OX=9606 GN=PSMA3 PE=1 SV=2	1.8272
P25789_K239	PSMA4	K*HEEEEAK	PSA4_HUMAN Proteasome subunit alpha type-4 OS=Homo sapiens OX=9606 GN=PSMA4 PE=1 SV=1	0.16313
P26006_K1031	ITGA3	ALYEAK*R	ITA3_HUMAN Integrin alpha-3 OS=Homo sapiens OX=9606 GN=ITGA3 PE=1 SV=5	1.15409
P26038_K139	MSN	YGDFNK*EVHK	MOES_HUMAN Moesin OS=Homo sapiens OX=9606 GN=MSN PE=1 SV=3	3.96825	Modified residue	Note=N6-acetyllysine;Ontology_term=ECO:0007744;evidence=ECO:0007744|PubMed:19608861;Dbxref=PMID:19608861
P26038_K143	MSN	EVHK*SGYLAGDK	MOES_HUMAN Moesin OS=Homo sapiens OX=9606 GN=MSN PE=1 SV=3	8.33333
P26038_K151	MSN	SGYLAGDK*LLPQR	MOES_HUMAN Moesin OS=Homo sapiens OX=9606 GN=MSN PE=1 SV=3	6.79824
P26038_K162	MSN	VLEQHK*LNK	MOES_HUMAN Moesin OS=Homo sapiens OX=9606 GN=MSN PE=1 SV=3	7.05771
P26038_K3	MSN	PK*TISVR	MOES_HUMAN Moesin OS=Homo sapiens OX=9606 GN=MSN PE=1 SV=3	2.43275
P26038_K352	MSN	LK*QIEEQTK	MOES_HUMAN Moesin OS=Homo sapiens OX=9606 GN=MSN PE=1 SV=3	5.62428
P26038_K359	MSN	QIEEQTK*K	MOES_HUMAN Moesin OS=Homo sapiens OX=9606 GN=MSN PE=1 SV=3	10
P26038_K360	MSN	K*AQQELEEQTR	MOES_HUMAN Moesin OS=Homo sapiens OX=9606 GN=MSN PE=1 SV=3	1.68345
P26038_K388	MSN	AQSEAEK*LAK	MOES_HUMAN Moesin OS=Homo sapiens OX=9606 GN=MSN PE=1 SV=3	2.44294
P26038_K400	MSN	ERQEAEEAK*EALLQASR QEAEEAK*EALLQASR	MOES_HUMAN Moesin OS=Homo sapiens OX=9606 GN=MSN PE=1 SV=3	4.37854
P26038_K412	MSN	K*TQEQLALEMAELTAR	MOES_HUMAN Moesin OS=Homo sapiens OX=9606 GN=MSN PE=1 SV=3	3.94386
P26038_K501	MSN	ADAMAK*DR	MOES_HUMAN Moesin OS=Homo sapiens OX=9606 GN=MSN PE=1 SV=3	4.4921
P26038_K538	MSN	K*TANDMIHAENMR	MOES_HUMAN Moesin OS=Homo sapiens OX=9606 GN=MSN PE=1 SV=3	1.69331
P26038_K72	MSN	K*ESPLLFK	MOES_HUMAN Moesin OS=Homo sapiens OX=9606 GN=MSN PE=1 SV=3	1.51571
P26373_K123	RPL13	SK*LILFPR	RL13_HUMAN 60S ribosomal protein L13 OS=Homo sapiens OX=9606 GN=RPL13 PE=1 SV=4	1.43158	Cross-link	Note=Glycyl lysine isopeptide (Lys-Gly) (interchain with G-Cter in SUMO2);Ontology_term=ECO:0007744;evidence=ECO:0007744|PubMed:28112733;Dbxref=PMID:28112733
P26373_K174	RPL13	VITEEEK*NFK	RL13_HUMAN 60S ribosomal protein L13 OS=Homo sapiens OX=9606 GN=RPL13 PE=1 SV=4	0.921984	Cross-link	Note=Glycyl lysine isopeptide (Lys-Gly) (interchain with G-Cter in SUMO1)%3B alternate;Ontology_term=ECO:0007744;evidence=ECO:0007744|PubMed:25114211;Dbxref=PMID:25114211
P26447_K22	S100A4	YSGK*EGDKFK	S10A4_HUMAN Protein S100-A4 OS=Homo sapiens OX=9606 GN=S100A4 PE=1 SV=1	2.30287
P26447_K31	S100A4	LNK*SELK	S10A4_HUMAN Protein S100-A4 OS=Homo sapiens OX=9606 GN=S100A4 PE=1 SV=1	0.310013
P26447_K35	S100A4	SELK*ELLTR	S10A4_HUMAN Protein S100-A4 OS=Homo sapiens OX=9606 GN=S100A4 PE=1 SV=1	0.43787	Modified residue	Note=N6-acetyllysine;Ontology_term=ECO:0007744;evidence=ECO:0007744|PubMed:19608861;Dbxref=PMID:19608861
P26447_K48	S100A4	ELPSFLGK*R	S10A4_HUMAN Protein S100-A4 OS=Homo sapiens OX=9606 GN=S100A4 PE=1 SV=1	1.00964
P26447_K57	S100A4	TDEAAFQK*LMSNLDSNR	S10A4_HUMAN Protein S100-A4 OS=Homo sapiens OX=9606 GN=S100A4 PE=1 SV=1	2.27634
P26583_K128	HMGB2	K*LGEMWSEQSAK	HMGB2_HUMAN High mobility group protein B2 OS=Homo sapiens OX=9606 GN=HMGB2 PE=1 SV=2	0.955237	DNA binding	Note=HMG box 2;Ontology_term=ECO:0000255;evidence=ECO:0000255|PROSITE-ProRule:PRU00267
P26583_K147	HMGB2	DKQPYEQK*AAK	HMGB2_HUMAN High mobility group protein B2 OS=Homo sapiens OX=9606 GN=HMGB2 PE=1 SV=2	1.07957	DNA binding	Note=HMG box 2;Ontology_term=ECO:0000255;evidence=ECO:0000255|PROSITE-ProRule:PRU00267
P26583_K3	HMGB2	GK*GDPNKPR	HMGB2_HUMAN High mobility group protein B2 OS=Homo sapiens OX=9606 GN=HMGB2 PE=1 SV=2	1.65056	Modified residue	Note=N6-acetyllysine;Ontology_term=ECO:0000250;evidence=ECO:0000250|UniProtKB:P63159
P26583_K30	HMGB2	K*HPDSSVNFAEFSK	HMGB2_HUMAN High mobility group protein B2 OS=Homo sapiens OX=9606 GN=HMGB2 PE=1 SV=2	0.785718	DNA binding$Modified residue$Disulfide bond	Note=HMG box 1;Ontology_term=ECO:0000255;evidence=ECO:0000255|PROSITE-ProRule:PRU00267$Note=N6-acetyllysine;Ontology_term=ECO:0007744;evidence=ECO:0007744|PubMed:19608861;Dbxref=PMID:19608861$Note=In disulfide HMGB2%3B alternate;Ontology_term=ECO:0000250;evidence=ECO:0000250|UniProtKB:P63159
P26583_K59	HMGB2	SK*FEDMAK	HMGB2_HUMAN High mobility group protein B2 OS=Homo sapiens OX=9606 GN=HMGB2 PE=1 SV=2	6.10498	DNA binding	Note=HMG box 1;Ontology_term=ECO:0000255;evidence=ECO:0000255|PROSITE-ProRule:PRU00267
P26599_K402	PTBP1	LHGK*PIR	PTBP1_HUMAN Polypyrimidine tract-binding protein 1 OS=Homo sapiens OX=9606 GN=PTBP1 PE=1 SV=1	5
P26599_K410	PTBP1	ITLSK*HQNVQLPR	PTBP1_HUMAN Polypyrimidine tract-binding protein 1 OS=Homo sapiens OX=9606 GN=PTBP1 PE=1 SV=1	4.93206
P26599_K428	PTBP1	EGQEDQGLTK*DYGNSPLHR	PTBP1_HUMAN Polypyrimidine tract-binding protein 1 OS=Homo sapiens OX=9606 GN=PTBP1 PE=1 SV=1	7.91261
P26639_K243	TARS1	ILNEK*VNTPTTTVYR	SYTC_HUMAN Threonine--tRNA ligase 1, cytoplasmic OS=Homo sapiens OX=9606 GN=TARS1 PE=1 SV=3	0.758582	Modified residue	Note=N6-acetyllysine;Ontology_term=ECO:0007744;evidence=ECO:0007744|PubMed:19608861;Dbxref=PMID:19608861
P26639_K319	TARS1	FQEEAK*NR	SYTC_HUMAN Threonine--tRNA ligase 1, cytoplasmic OS=Homo sapiens OX=9606 GN=TARS1 PE=1 SV=3	1.20482
P26639_K549	TARS1	IDIQIK*DAIGR	SYTC_HUMAN Threonine--tRNA ligase 1, cytoplasmic OS=Homo sapiens OX=9606 GN=TARS1 PE=1 SV=3	2.9392
P26639_K65	TARS1	LEMYNILK*AEHDSILAEK	SYTC_HUMAN Threonine--tRNA ligase 1, cytoplasmic OS=Homo sapiens OX=9606 GN=TARS1 PE=1 SV=3	2.12766
P26639_K694	TARS1	DNK*VHGER	SYTC_HUMAN Threonine--tRNA ligase 1, cytoplasmic OS=Homo sapiens OX=9606 GN=TARS1 PE=1 SV=3	1.31579
P26639_K712	TARS1	LQQLK*EFR	SYTC_HUMAN Threonine--tRNA ligase 1, cytoplasmic OS=Homo sapiens OX=9606 GN=TARS1 PE=1 SV=3	5.33885
P26639_K75	TARS1	AEHDSILAEK*AEK	SYTC_HUMAN Threonine--tRNA ligase 1, cytoplasmic OS=Homo sapiens OX=9606 GN=TARS1 PE=1 SV=3	10
P26640_K966	VARS1	GLGK*GFVPSPTSQPGGHESLVDR	SYVC_HUMAN Valine--tRNA ligase OS=Homo sapiens OX=9606 GN=VARS1 PE=1 SV=4	1.07527
P26641_K132	EEF1G	QATENAK*EEVR	EF1G_HUMAN Elongation factor 1-gamma OS=Homo sapiens OX=9606 GN=EEF1G PE=1 SV=3	0.92004
P26641_K208	EEF1G	AVLGEVK*LCEK	EF1G_HUMAN Elongation factor 1-gamma OS=Homo sapiens OX=9606 GN=EEF1G PE=1 SV=3	0.600233
P26641_K212	EEF1G	LCEK*MAQFDAK	EF1G_HUMAN Elongation factor 1-gamma OS=Homo sapiens OX=9606 GN=EEF1G PE=1 SV=3	0.82554	Modified residue	Note=N6-acetyllysine;Ontology_term=ECO:0000250;evidence=ECO:0000250|UniProtKB:Q9D8N0
P26641_K219	EEF1G	MAQFDAK*K	EF1G_HUMAN Elongation factor 1-gamma OS=Homo sapiens OX=9606 GN=EEF1G PE=1 SV=3	0.833727
P26641_K220	EEF1G	K*FAETQPK	EF1G_HUMAN Elongation factor 1-gamma OS=Homo sapiens OX=9606 GN=EEF1G PE=1 SV=3	0.540725
P26641_K227	EEF1G	FAETQPK*K	EF1G_HUMAN Elongation factor 1-gamma OS=Homo sapiens OX=9606 GN=EEF1G PE=1 SV=3	0.886695
P26641_K241	EEF1G	EEK*QKPQAER	EF1G_HUMAN Elongation factor 1-gamma OS=Homo sapiens OX=9606 GN=EEF1G PE=1 SV=3	1.66876
P26641_K277	EEF1G	AK*DPFAHLPK	EF1G_HUMAN Elongation factor 1-gamma OS=Homo sapiens OX=9606 GN=EEF1G PE=1 SV=3	0.891968
P26641_K294	EEF1G	STFVLDEFK*R	EF1G_HUMAN Elongation factor 1-gamma OS=Homo sapiens OX=9606 GN=EEF1G PE=1 SV=3	8.47237
P26641_K401	EEF1G	K*LDPGSEETQTLVR	EF1G_HUMAN Elongation factor 1-gamma OS=Homo sapiens OX=9606 GN=EEF1G PE=1 SV=3	6.41147	Modified residue	Note=N6-acetyllysine;Ontology_term=ECO:0000250;evidence=ECO:0000250|UniProtKB:Q9D8N0
P26641_K434	EEF1G	AFNQGK*IFK	EF1G_HUMAN Elongation factor 1-gamma OS=Homo sapiens OX=9606 GN=EEF1G PE=1 SV=3	0.520275	Modified residue	Note=N6-acetyllysine%3B alternate;Ontology_term=ECO:0007744;evidence=ECO:0007744|PubMed:19608861;Dbxref=PMID:19608861
P26885_K103	FKBP2	K*LVIPSELGYGER	FKBP2_HUMAN Peptidyl-prolyl cis-trans isomerase FKBP2 OS=Homo sapiens OX=9606 GN=FKBP2 PE=1 SV=2	0.971387
P27348_K139	YWHAQ	K*QTIDNSQGAYQEAFDISK	1433T_HUMAN 14-3-3 protein theta OS=Homo sapiens OX=9606 GN=YWHAQ PE=1 SV=1	5.26316
P27348_K68	YWHAQ	VISSIEQK*TDTSDK	1433T_HUMAN 14-3-3 protein theta OS=Homo sapiens OX=9606 GN=YWHAQ PE=1 SV=1	1.23457	Modified residue	Note=N6-acetyllysine;Ontology_term=ECO:0007744;evidence=ECO:0007744|PubMed:19608861;Dbxref=PMID:19608861
P27348_K85	YWHAQ	EK*VESELR	1433T_HUMAN 14-3-3 protein theta OS=Homo sapiens OX=9606 GN=YWHAQ PE=1 SV=1	3.10994
P27348_K9	YWHAQ	TELIQK*AK	1433T_HUMAN 14-3-3 protein theta OS=Homo sapiens OX=9606 GN=YWHAQ PE=1 SV=1	0.173568
P27635_K101	RPL10	INK*MLSCAGADR	RL10_HUMAN 60S ribosomal protein L10 OS=Homo sapiens OX=9606 GN=RPL10 PE=1 SV=4	0.530123
P27635_K121	RPL10	GAFGK*PQGTVAR	RL10_HUMAN 60S ribosomal protein L10 OS=Homo sapiens OX=9606 GN=RPL10 PE=1 SV=4	0.722237
P27635_K145	RPL10	LQNK*EHVIEALR	RL10_HUMAN 60S ribosomal protein L10 OS=Homo sapiens OX=9606 GN=RPL10 PE=1 SV=4	0.412577
P27635_K15	RPL10	NK*PYPK	RL10_HUMAN 60S ribosomal protein L10 OS=Homo sapiens OX=9606 GN=RPL10 PE=1 SV=4	0.211873
P27635_K158	RPL10	FK*FPGR	RL10_HUMAN 60S ribosomal protein L10 OS=Homo sapiens OX=9606 GN=RPL10 PE=1 SV=4	1.12676
P27635_K19	RPL10	NKPYPK*SR	RL10_HUMAN 60S ribosomal protein L10 OS=Homo sapiens OX=9606 GN=RPL10 PE=1 SV=4	1.25078
P27635_K208	RPL10	GPLDK*WR	RL10_HUMAN 60S ribosomal protein L10 OS=Homo sapiens OX=9606 GN=RPL10 PE=1 SV=4	1.00586
P27635_K30	RPL10	GVPDAK*IR	RL10_HUMAN 60S ribosomal protein L10 OS=Homo sapiens OX=9606 GN=RPL10 PE=1 SV=4	0.756298
P27708_K1657	CAD	LGPGK*GEVRPELGSR	PYR1_HUMAN CAD protein OS=Homo sapiens OX=9606 GN=CAD PE=1 SV=3	1.29581
P27708_K595	CAD	SLK*GWK	PYR1_HUMAN CAD protein OS=Homo sapiens OX=9606 GN=CAD PE=1 SV=3	1.0989
P27797_K159	CALR	NVLINK*DIR	CALR_HUMAN Calreticulin OS=Homo sapiens OX=9606 GN=CALR PE=1 SV=1	1.68608	Modified residue	Note=N6-acetyllysine;Ontology_term=ECO:0007744;evidence=ECO:0007744|PubMed:19608861;Dbxref=PMID:19608861
P27797_K209	CALR	IK*DPDASKPEDWDER	CALR_HUMAN Calreticulin OS=Homo sapiens OX=9606 GN=CALR PE=1 SV=1	2.85714	Modified residue	Note=N6-acetyllysine;Ontology_term=ECO:0007744;evidence=ECO:0007744|PubMed:19608861;Dbxref=PMID:19608861
P27797_K238	CALR	IDDPTDSKPEDWDK*PEHIPDPDAK	CALR_HUMAN Calreticulin OS=Homo sapiens OX=9606 GN=CALR PE=1 SV=1	7.14286
P27797_K276	CALR	GEWK*PR	CALR_HUMAN Calreticulin OS=Homo sapiens OX=9606 GN=CALR PE=1 SV=1	3.07738
P27797_K355	CALR	AAEK*QMK	CALR_HUMAN Calreticulin OS=Homo sapiens OX=9606 GN=CALR PE=1 SV=1	5.26316
P27797_K368	CALR	LK*EEEEDKK LK*EEEEDKKR	CALR_HUMAN Calreticulin OS=Homo sapiens OX=9606 GN=CALR PE=1 SV=1	6.79825
P27797_K375	CALR	LKEEEEDKK*R	CALR_HUMAN Calreticulin OS=Homo sapiens OX=9606 GN=CALR PE=1 SV=1	0.646015
P27797_K43	CALR	HK*SDFGK	CALR_HUMAN Calreticulin OS=Homo sapiens OX=9606 GN=CALR PE=1 SV=1	1.45894
P27816_K1066	MAP4	EK*AQAK	MAP4_HUMAN Microtubule-associated protein 4 OS=Homo sapiens OX=9606 GN=MAP4 PE=1 SV=3	0.5848
P27816_K933	MAP4	LATNTSAPDLK*NVR	MAP4_HUMAN Microtubule-associated protein 4 OS=Homo sapiens OX=9606 GN=MAP4 PE=1 SV=3	4.72222
P27816_K946	MAP4	VGSTENIK*HQPGGGR	MAP4_HUMAN Microtubule-associated protein 4 OS=Homo sapiens OX=9606 GN=MAP4 PE=1 SV=3	2.71991
P27824_K170	CANX	LLSK*TPELNLDQFHDK	CALX_HUMAN Calnexin OS=Homo sapiens OX=9606 GN=CANX PE=1 SV=2	1.36962	Disulfide bond	Ontology_term=ECO:0000250;evidence=ECO:0000250
P27824_K199	CANX	CGEDYK*LHFIFR	CALX_HUMAN Calnexin OS=Homo sapiens OX=9606 GN=CANX PE=1 SV=2	1.1687
P27824_K217	CANX	TGIYEEK*HAK	CALX_HUMAN Calnexin OS=Homo sapiens OX=9606 GN=CANX PE=1 SV=2	1.99892
P27824_K380	CANX	PVIDNPNYK*GK	CALX_HUMAN Calnexin OS=Homo sapiens OX=9606 GN=CANX PE=1 SV=2	4.67305
P28066_K192	PSMA5	SMTLK*EAIK	PSA5_HUMAN Proteasome subunit alpha type-5 OS=Homo sapiens OX=9606 GN=PSMA5 PE=1 SV=3	1.14943
P28066_K91	PSMA5	TLIDK*AR	PSA5_HUMAN Proteasome subunit alpha type-5 OS=Homo sapiens OX=9606 GN=PSMA5 PE=1 SV=3	1.26614
P28070_K201	PSMB4	EVLEK*QPVLSQTEAR	PSB4_HUMAN Proteasome subunit beta type-4 OS=Homo sapiens OX=9606 GN=PSMB4 PE=1 SV=4	3.81118
P29034_K32	S100A2	LSK*GEMK	S10A2_HUMAN Protein S100-A2 OS=Homo sapiens OX=9606 GN=S100A2 PE=1 SV=3	0.925595
P29034_K50	S100A2	ELPSFVGEK*VDEEGLKK	S10A2_HUMAN Protein S100-A2 OS=Homo sapiens OX=9606 GN=S100A2 PE=1 SV=3	0.449292
P29034_K57	S100A2	VDEEGLK*K	S10A2_HUMAN Protein S100-A2 OS=Homo sapiens OX=9606 GN=S100A2 PE=1 SV=3	0.84034
P29401_K16	TKT	LQALK*DTANR	TKT_HUMAN Transketolase OS=Homo sapiens OX=9606 GN=TKT PE=1 SV=3	1.71988
P29401_K232	TKT	AFGQAK*HQPTAIIAK	TKT_HUMAN Transketolase OS=Homo sapiens OX=9606 GN=TKT PE=1 SV=3	0.969172	Modified residue	Note=N6-acetyllysine;Ontology_term=ECO:0000250;evidence=ECO:0000250|UniProtKB:P40142
P29401_K314	TKT	VGDK*IATR	TKT_HUMAN Transketolase OS=Homo sapiens OX=9606 GN=TKT PE=1 SV=3	1.54163
P29401_K319	TKT	K*AYGQALAK	TKT_HUMAN Transketolase OS=Homo sapiens OX=9606 GN=TKT PE=1 SV=3	1.76364
P29401_K352	TKT	NSTFSEIFK*K	TKT_HUMAN Transketolase OS=Homo sapiens OX=9606 GN=TKT PE=1 SV=3	2.12766	Cross-link	Note=Glycyl lysine isopeptide (Lys-Gly) (interchain with G-Cter in SUMO2);Ontology_term=ECO:0007744;evidence=ECO:0007744|PubMed:28112733;Dbxref=PMID:28112733
P29401_K353	TKT	K*EHPDR	TKT_HUMAN Transketolase OS=Homo sapiens OX=9606 GN=TKT PE=1 SV=3	9.09091
P29401_K497	TKT	VVLK*SK	TKT_HUMAN Transketolase OS=Homo sapiens OX=9606 GN=TKT PE=1 SV=3	1.88789
P29401_K543	TKT	K*LILDSAR	TKT_HUMAN Transketolase OS=Homo sapiens OX=9606 GN=TKT PE=1 SV=3	6.51261
P29692_K117	EEF1D	LNVLEK*SSPGHR	EF1D_HUMAN Elongation factor 1-delta OS=Homo sapiens OX=9606 GN=EEF1D PE=1 SV=5	5.97284	Modified residue	Note=N6-acetyllysine%3B alternate;Ontology_term=ECO:0007744;evidence=ECO:0007744|PubMed:19608861;Dbxref=PMID:19608861
P29692_K17	EEF1D	FK*YDDAER	EF1D_HUMAN Elongation factor 1-delta OS=Homo sapiens OX=9606 GN=EEF1D PE=1 SV=5	1.17155	Modified residue	Note=N6-acetyllysine;Ontology_term=ECO:0007744;evidence=ECO:0007744|PubMed:19608861;Dbxref=PMID:19608861
P29692_K59	EEF1D	ENIQK*SLAGSSGPGASSGTSGDHGELVVR	EF1D_HUMAN Elongation factor 1-delta OS=Homo sapiens OX=9606 GN=EEF1D PE=1 SV=5	5.40936
P29833_K26		K*AEELER	SHDAG_HDVL1 Small delta antigen OS=Hepatitis delta virus genotype I (isolate Lebanon-1) OX=31763 PE=3 SV=3	9.09091
P30041_K209	PRDX6	GVFTK*ELPSGK	PRDX6_HUMAN Peroxiredoxin-6 OS=Homo sapiens OX=9606 GN=PRDX6 PE=1 SV=3	0.78673	Modified residue	Note=N6-acetyllysine%3B alternate;Ontology_term=ECO:0007744;evidence=ECO:0007744|PubMed:19608861;Dbxref=PMID:19608861
P30041_K56	PRDX6	AAK*LAPEFAK	PRDX6_HUMAN Peroxiredoxin-6 OS=Homo sapiens OX=9606 GN=PRDX6 PE=1 SV=3	0.851222
P30041_K63	PRDX6	LAPEFAK*R	PRDX6_HUMAN Peroxiredoxin-6 OS=Homo sapiens OX=9606 GN=PRDX6 PE=1 SV=3	1.41621	Modified residue	Note=N6-acetyllysine;Ontology_term=ECO:0007744;evidence=ECO:0007744|PubMed:19608861;Dbxref=PMID:19608861
P30050_K40	RPL12	IGPLGLSPK*K	RL12_HUMAN 60S ribosomal protein L12 OS=Homo sapiens OX=9606 GN=RPL12 PE=1 SV=1	2.91921	Cross-link	Note=Glycyl lysine isopeptide (Lys-Gly) (interchain with G-Cter in SUMO2);Ontology_term=ECO:0007744;evidence=ECO:0007744|PubMed:28112733;Dbxref=PMID:28112733
P30050_K54	RPL12	ATGDWK*GLR	RL12_HUMAN 60S ribosomal protein L12 OS=Homo sapiens OX=9606 GN=RPL12 PE=1 SV=1	5.55556	Modified residue	Note=N6-acetyllysine;Ontology_term=ECO:0007744;evidence=ECO:0007744|PubMed:19608861;Dbxref=PMID:19608861
P30101_K129	PDIA3	TADGIVSHLK*K	PDIA3_HUMAN Protein disulfide-isomerase A3 OS=Homo sapiens OX=9606 GN=PDIA3 PE=1 SV=4	4.38328	Modified residue	Note=N6-succinyllysine;Ontology_term=ECO:0000250;evidence=ECO:0000250|UniProtKB:P27773
P30101_K214	PDIA3	PSHLTNK*FEDK	PDIA3_HUMAN Protein disulfide-isomerase A3 OS=Homo sapiens OX=9606 GN=PDIA3 PE=1 SV=4	2.08494
P30101_K347	PDIA3	DGK*ALER	PDIA3_HUMAN Protein disulfide-isomerase A3 OS=Homo sapiens OX=9606 GN=PDIA3 PE=1 SV=4	3.14104
P30101_K366	PDIA3	YLK*SEPIPESNDGPVK	PDIA3_HUMAN Protein disulfide-isomerase A3 OS=Homo sapiens OX=9606 GN=PDIA3 PE=1 SV=4	5
P30101_K417	PDIA3	YK*ELGEK	PDIA3_HUMAN Protein disulfide-isomerase A3 OS=Homo sapiens OX=9606 GN=PDIA3 PE=1 SV=4	1.51515
P30101_K422	PDIA3	ELGEK*LSK	PDIA3_HUMAN Protein disulfide-isomerase A3 OS=Homo sapiens OX=9606 GN=PDIA3 PE=1 SV=4	1.83081
P30101_K466	PDIA3	K*YEGGR	PDIA3_HUMAN Protein disulfide-isomerase A3 OS=Homo sapiens OX=9606 GN=PDIA3 PE=1 SV=4	1.26582
P30153_K107	PPP2R1A	DK*AVESLR	2AAA_HUMAN Serine/threonine-protein phosphatase 2A 65 kDa regulatory subunit A alpha isoform OS=Homo sapiens OX=9606 GN=PPP2R1A PE=1 SV=4	4.53556
P30153_K163	PPP2R1A	VSSAVK*AELR	2AAA_HUMAN Serine/threonine-protein phosphatase 2A 65 kDa regulatory subunit A alpha isoform OS=Homo sapiens OX=9606 GN=PPP2R1A PE=1 SV=4	9.28571
P30153_K188	PPP2R1A	AAASK*LGEFAK	2AAA_HUMAN Serine/threonine-protein phosphatase 2A 65 kDa regulatory subunit A alpha isoform OS=Homo sapiens OX=9606 GN=PPP2R1A PE=1 SV=4	1.76463
P30153_K255	PPP2R1A	QAAEDK*SWR	2AAA_HUMAN Serine/threonine-protein phosphatase 2A 65 kDa regulatory subunit A alpha isoform OS=Homo sapiens OX=9606 GN=PPP2R1A PE=1 SV=4	10
P30153_K266	PPP2R1A	YMVADK*FTELQK	2AAA_HUMAN Serine/threonine-protein phosphatase 2A 65 kDa regulatory subunit A alpha isoform OS=Homo sapiens OX=9606 GN=PPP2R1A PE=1 SV=4	5
P30153_K305	PPP2R1A	AAASHK*VK	2AAA_HUMAN Serine/threonine-protein phosphatase 2A 65 kDa regulatory subunit A alpha isoform OS=Homo sapiens OX=9606 GN=PPP2R1A PE=1 SV=4	0.733805
P30153_K472	PPP2R1A	LVEK*FGK	2AAA_HUMAN Serine/threonine-protein phosphatase 2A 65 kDa regulatory subunit A alpha isoform OS=Homo sapiens OX=9606 GN=PPP2R1A PE=1 SV=4	0.566373
P30153_K542	PPP2R1A	FNVAK*SLQK	2AAA_HUMAN Serine/threonine-protein phosphatase 2A 65 kDa regulatory subunit A alpha isoform OS=Homo sapiens OX=9606 GN=PPP2R1A PE=1 SV=4	0.64138
P30519_K259	HMOX2	ETLEDGFPVHDGK*GDMR	HMOX2_HUMAN Heme oxygenase 2 OS=Homo sapiens OX=9606 GN=HMOX2 PE=1 SV=2	4.30912
P30825_K17	SLC7A1	K*VVDCSR	SL7A1_HUMAN High affinity cationic amino acid transporter 1 OS=Homo sapiens OX=9606 GN=SLC7A1 PE=1 SV=1	0.514355
P31153_K350	MAT2A	ELLEIVK*K	METK2_HUMAN S-adenosylmethionine synthase isoform type-2 OS=Homo sapiens OX=9606 GN=MAT2A PE=1 SV=1	0.994498
P31153_K88	MAT2A	EAVK*HIGYDDSSK	METK2_HUMAN S-adenosylmethionine synthase isoform type-2 OS=Homo sapiens OX=9606 GN=MAT2A PE=1 SV=1	1.08696
P31930_K225	UQCRC1	ADLTEYLSTHYK*APR	QCR1_HUMAN Cytochrome b-c1 complex subunit 1, mitochondrial OS=Homo sapiens OX=9606 GN=UQCRC1 PE=1 SV=3	8.33333
P31942_K255	HNRNPH3	DK*NNMQHR	HNRH3_HUMAN Heterogeneous nuclear ribonucleoprotein H3 OS=Homo sapiens OX=9606 GN=HNRNPH3 PE=1 SV=2	10
P31943_K14	HNRNPH1	EGFVVK*VR	HNRH1_HUMAN Heterogeneous nuclear ribonucleoprotein H OS=Homo sapiens OX=9606 GN=HNRNPH1 PE=1 SV=4	3.00505
P31943_K349	HNRNPH1	DK*ANMQHR	HNRH1_HUMAN Heterogeneous nuclear ribonucleoprotein H OS=Homo sapiens OX=9606 GN=HNRNPH1 PE=1 SV=4	1.11585
P31943_K35	HNRNPH1	FFSDCK*IQNGAQGIR	HNRH1_HUMAN Heterogeneous nuclear ribonucleoprotein H OS=Homo sapiens OX=9606 GN=HNRNPH1 PE=1 SV=4	2.50186	Cross-link	Note=Glycyl lysine isopeptide (Lys-Gly) (interchain with G-Cter in SUMO2);Ontology_term=ECO:0007744;evidence=ECO:0007744|PubMed:28112733;Dbxref=PMID:28112733
P31943_K98	HNRNPH1	SNNVEMDWVLK*HTGPNSPDTANDGFVR	HNRH1_HUMAN Heterogeneous nuclear ribonucleoprotein H OS=Homo sapiens OX=9606 GN=HNRNPH1 PE=1 SV=4	1.23484	Cross-link	Note=Glycyl lysine isopeptide (Lys-Gly) (interchain with G-Cter in SUMO2);Ontology_term=ECO:0007744;evidence=ECO:0007744|PubMed:28112733;Dbxref=PMID:28112733
P31946_K11	YWHAB	SELVQK*AK	1433B_HUMAN 14-3-3 protein beta/alpha OS=Homo sapiens OX=9606 GN=YWHAB PE=1 SV=3	0.478713
P31946_K70	YWHAB	VISSIEQK*TER	1433B_HUMAN 14-3-3 protein beta/alpha OS=Homo sapiens OX=9606 GN=YWHAB PE=1 SV=3	1.33966	Modified residue	Note=N6-acetyllysine;Ontology_term=ECO:0007744;evidence=ECO:0007744|PubMed:19608861;Dbxref=PMID:19608861
P31946_K77	YWHAB	K*QQMGK	1433B_HUMAN 14-3-3 protein beta/alpha OS=Homo sapiens OX=9606 GN=YWHAB PE=1 SV=3	0.957277
P31947_K32	SFN	GAVEK*GEELSCEER	1433S_HUMAN 14-3-3 protein sigma OS=Homo sapiens OX=9606 GN=SFN PE=1 SV=1	5
P31947_K68	SFN	VLSSIEQK*SNEEGSEEKGPEVR	1433S_HUMAN 14-3-3 protein sigma OS=Homo sapiens OX=9606 GN=SFN PE=1 SV=1	8.05556
P31947_K9	SFN	ASLIQK*AK	1433S_HUMAN 14-3-3 protein sigma OS=Homo sapiens OX=9606 GN=SFN PE=1 SV=1	1.31433
P31948_K100	STIP1	TYEEGLK*HEANNPQLK	STIP1_HUMAN Stress-induced-phosphoprotein 1 OS=Homo sapiens OX=9606 GN=STIP1 PE=1 SV=1	3.71548
P31948_K239	STIP1	K*DFDTALK	STIP1_HUMAN Stress-induced-phosphoprotein 1 OS=Homo sapiens OX=9606 GN=STIP1 PE=1 SV=1	1.78571
P31948_K284	STIP1	ELCEK*AIEVGR	STIP1_HUMAN Stress-induced-phosphoprotein 1 OS=Homo sapiens OX=9606 GN=STIP1 PE=1 SV=1	9.7619
P31948_K325	STIP1	DAIHFYNK*SLAEHR	STIP1_HUMAN Stress-induced-phosphoprotein 1 OS=Homo sapiens OX=9606 GN=STIP1 PE=1 SV=1	0.727915	Modified residue	Note=N6-acetyllysine;Ontology_term=ECO:0007744;evidence=ECO:0007744|PubMed:19608861;Dbxref=PMID:19608861
P31948_K364	STIP1	LAYINPDLALEEK*NK	STIP1_HUMAN Stress-induced-phosphoprotein 1 OS=Homo sapiens OX=9606 GN=STIP1 PE=1 SV=1	9.12105
P31948_K388	STIP1	HYTEAIK*R	STIP1_HUMAN Stress-induced-phosphoprotein 1 OS=Homo sapiens OX=9606 GN=STIP1 PE=1 SV=1	6.11888
P31948_K392	STIP1	NPK*DAK	STIP1_HUMAN Stress-induced-phosphoprotein 1 OS=Homo sapiens OX=9606 GN=STIP1 PE=1 SV=1	0.86207
P31948_K434	STIP1	K*AAALEAMK	STIP1_HUMAN Stress-induced-phosphoprotein 1 OS=Homo sapiens OX=9606 GN=STIP1 PE=1 SV=1	0.5848
P31948_K486	STIP1	HDSPEDVK*R	STIP1_HUMAN Stress-induced-phosphoprotein 1 OS=Homo sapiens OX=9606 GN=STIP1 PE=1 SV=1	1.59765
P31948_K50	STIP1	SAAYAK*K	STIP1_HUMAN Stress-induced-phosphoprotein 1 OS=Homo sapiens OX=9606 GN=STIP1 PE=1 SV=1	4.09893
P31948_K530	STIP1	NPVIAQK*IQK	STIP1_HUMAN Stress-induced-phosphoprotein 1 OS=Homo sapiens OX=9606 GN=STIP1 PE=1 SV=1	0.225233
P31948_K68	STIP1	TVDLK*PDWGK	STIP1_HUMAN Stress-induced-phosphoprotein 1 OS=Homo sapiens OX=9606 GN=STIP1 PE=1 SV=1	6.66667
P31948_K78	STIP1	K*AAALEFLNR	STIP1_HUMAN Stress-induced-phosphoprotein 1 OS=Homo sapiens OX=9606 GN=STIP1 PE=1 SV=1	0.331058
P31948_K92	STIP1	FEEAK*R	STIP1_HUMAN Stress-induced-phosphoprotein 1 OS=Homo sapiens OX=9606 GN=STIP1 PE=1 SV=1	1.51515
P31949_K103	S100A11	AVPSQK*R	S10AB_HUMAN Protein S100-A11 OS=Homo sapiens OX=9606 GN=S100A11 PE=1 SV=2	0.459592
P31949_K27	S100A11	YAGK*DGYNYTLSK	S10AB_HUMAN Protein S100-A11 OS=Homo sapiens OX=9606 GN=S100A11 PE=1 SV=2	0.792423	Modified residue	Note=N6-acetyllysine;Ontology_term=ECO:0000250;evidence=ECO:0000250|UniProtKB:P50543
P31949_K55	S100A11	NQK*DPGVLDR	S10AB_HUMAN Protein S100-A11 OS=Homo sapiens OX=9606 GN=S100A11 PE=1 SV=2	0.36054
P32119_K10	PRDX2	IGK*PAPDFK	PRDX2_HUMAN Peroxiredoxin-2 OS=Homo sapiens OX=9606 GN=PRDX2 PE=1 SV=5	4.64597
P32119_K119	PRDX2	LSEDYGVLK*TDEGIAYR	PRDX2_HUMAN Peroxiredoxin-2 OS=Homo sapiens OX=9606 GN=PRDX2 PE=1 SV=5	5.13158
P32119_K196	PRDX2	EYFSK*HN	PRDX2_HUMAN Peroxiredoxin-2 OS=Homo sapiens OX=9606 GN=PRDX2 PE=1 SV=5	2.28288
P32969_K121	RPL9	NFLGEK*YIR	RL9_HUMAN 60S ribosomal protein L9 OS=Homo sapiens OX=9606 GN=RPL9 PE=1 SV=1	4.17548	Modified residue	Note=N6-acetyllysine;Ontology_term=ECO:0007744;evidence=ECO:0007744|PubMed:19608861;Dbxref=PMID:19608861
P32969_K174	RPL9	K*FLDGIYVSEK	RL9_HUMAN 60S ribosomal protein L9 OS=Homo sapiens OX=9606 GN=RPL9 PE=1 SV=1	0.937013
P32969_K28	RPL9	TVIVK*GPR	RL9_HUMAN 60S ribosomal protein L9 OS=Homo sapiens OX=9606 GN=RPL9 PE=1 SV=1	7.01272
P33176_K801	KIF5B	K*LFVQDLATR	KINH_HUMAN Kinesin-1 heavy chain OS=Homo sapiens OX=9606 GN=KIF5B PE=1 SV=1	1.4033
P33316_K179	DUT	SGLAAK*HFIDVGAGVIDEDYR	DUT_HUMAN Deoxyuridine 5'-triphosphate nucleotidohydrolase, mitochondrial OS=Homo sapiens OX=9606 GN=DUT PE=1 SV=4	5.55556
P34897_K103	SHMT2	YSEGYPGK*R	GLYM_HUMAN Serine hydroxymethyltransferase, mitochondrial OS=Homo sapiens OX=9606 GN=SHMT2 PE=1 SV=3	1.16279	Modified residue	Note=N6-acetyllysine;Ontology_term=ECO:0007744;evidence=ECO:0007744|PubMed:19608861;Dbxref=PMID:19608861
P34932_K477	HSPA4	VTPQSDGSSSK*VK	HSP74_HUMAN Heat shock 70 kDa protein 4 OS=Homo sapiens OX=9606 GN=HSPA4 PE=1 SV=4	0.52919
P34932_K686	HSPA4	NLGQPIK*IR	HSP74_HUMAN Heat shock 70 kDa protein 4 OS=Homo sapiens OX=9606 GN=HSPA4 PE=1 SV=4	1.28975
P35221_K695	CTNNA1	IAEQVASFQEEK*SK	CTNA1_HUMAN Catenin alpha-1 OS=Homo sapiens OX=9606 GN=CTNNA1 PE=1 SV=1	0.8547
P35232_K202	PHB	FVVEK*AEQQK	PHB_HUMAN Prohibitin OS=Homo sapiens OX=9606 GN=PHB PE=1 SV=1	2.6702	Modified residue	Note=N6-acetyllysine%3B alternate;Ontology_term=ECO:0007744;evidence=ECO:0007744|PubMed:19608861;Dbxref=PMID:19608861
P35232_K240	PHB	K*LEAAEDIAYQLSR	PHB_HUMAN Prohibitin OS=Homo sapiens OX=9606 GN=PHB PE=1 SV=1	10
P35241_K400	RDX	AAEEAK*SAIAK	RADI_HUMAN Radixin OS=Homo sapiens OX=9606 GN=RDX PE=1 SV=1	6.51953
P35241_K520	RDX	VTETQK*NER	RADI_HUMAN Radixin OS=Homo sapiens OX=9606 GN=RDX PE=1 SV=1	5.26316
P35268_K107	RPL22	VVANSK*ESYELR	RL22_HUMAN 60S ribosomal protein L22 OS=Homo sapiens OX=9606 GN=RPL22 PE=1 SV=2	7.27785
P35270_K226	SPR	GLQELK*AK	SPRE_HUMAN Sepiapterin reductase OS=Homo sapiens OX=9606 GN=SPR PE=1 SV=1	0.96154
P35579_K1014	MYH9	IAEFTTNLTEEEEK*SK	MYH9_HUMAN Myosin-9 OS=Homo sapiens OX=9606 GN=MYH9 PE=1 SV=4	6.03158
P35579_K102	MYH9	VEDMAELTCLNEASVLHNLK*ER	MYH9_HUMAN Myosin-9 OS=Homo sapiens OX=9606 GN=MYH9 PE=1 SV=4	1.4953	Modified residue	Note=N6-acetyllysine;Ontology_term=ECO:0007744;evidence=ECO:0007744|PubMed:19608861;Dbxref=PMID:19608861
P35579_K1024	MYH9	NK*HEAMITDLEER	MYH9_HUMAN Myosin-9 OS=Homo sapiens OX=9606 GN=MYH9 PE=1 SV=4	0.909893	Modified residue	Note=N6-acetyllysine;Ontology_term=ECO:0007744;evidence=ECO:0007744|PubMed:19608861;Dbxref=PMID:19608861
P35579_K1048	MYH9	QELEK*TR	MYH9_HUMAN Myosin-9 OS=Homo sapiens OX=9606 GN=MYH9 PE=1 SV=4	2.63828
P35579_K1104	MYH9	NMALK*K	MYH9_HUMAN Myosin-9 OS=Homo sapiens OX=9606 GN=MYH9 PE=1 SV=4	6.18259
P35579_K1173	MYH9	EQEVNILK*K	MYH9_HUMAN Myosin-9 OS=Homo sapiens OX=9606 GN=MYH9 PE=1 SV=4	2.71171
P35579_K1181	MYH9	TLEEEAK*THEAQIQEMR	MYH9_HUMAN Myosin-9 OS=Homo sapiens OX=9606 GN=MYH9 PE=1 SV=4	7.0817
P35579_K1209	MYH9	HSQAVEELAEQLEQTK*R	MYH9_HUMAN Myosin-9 OS=Homo sapiens OX=9606 GN=MYH9 PE=1 SV=4	3.65878
P35579_K1212	MYH9	VK*ANLEK	MYH9_HUMAN Myosin-9 OS=Homo sapiens OX=9606 GN=MYH9 PE=1 SV=4	1.25143
P35579_K1217	MYH9	ANLEK*AK	MYH9_HUMAN Myosin-9 OS=Homo sapiens OX=9606 GN=MYH9 PE=1 SV=4	0.743933
P35579_K1219	MYH9	AK*QTLENER	MYH9_HUMAN Myosin-9 OS=Homo sapiens OX=9606 GN=MYH9 PE=1 SV=4	1.07605
P35579_K1240	MYH9	VLLQGK*GDSEHK VLLQGK*GDSEHKR	MYH9_HUMAN Myosin-9 OS=Homo sapiens OX=9606 GN=MYH9 PE=1 SV=4	0.562007
P35579_K1246	MYH9	GDSEHK*R	MYH9_HUMAN Myosin-9 OS=Homo sapiens OX=9606 GN=MYH9 PE=1 SV=4	1.33286
P35579_K1249	MYH9	K*VEAQLQELQVK	MYH9_HUMAN Myosin-9 OS=Homo sapiens OX=9606 GN=MYH9 PE=1 SV=4	0.371385	Modified residue	Note=N6-acetyllysine;Ontology_term=ECO:0000250;evidence=ECO:0000250|UniProtKB:Q8VDD5
P35579_K1274	MYH9	TELADK*VTK	MYH9_HUMAN Myosin-9 OS=Homo sapiens OX=9606 GN=MYH9 PE=1 SV=4	2.2102
P35579_K1330	MYH9	LSLSTK*LK	MYH9_HUMAN Myosin-9 OS=Homo sapiens OX=9606 GN=MYH9 PE=1 SV=4	3.12922
P35579_K1338	MYH9	QVEDEK*NSFR	MYH9_HUMAN Myosin-9 OS=Homo sapiens OX=9606 GN=MYH9 PE=1 SV=4	10
P35579_K1352	MYH9	EQLEEEEEAK*HNLEK	MYH9_HUMAN Myosin-9 OS=Homo sapiens OX=9606 GN=MYH9 PE=1 SV=4	8.02225
P35579_K1392	MYH9	LQK*DLEGLSQR	MYH9_HUMAN Myosin-9 OS=Homo sapiens OX=9606 GN=MYH9 PE=1 SV=4	6.00022	Modified residue	Note=N6-acetyllysine;Ontology_term=ECO:0007744;evidence=ECO:0007744|PubMed:19608861;Dbxref=PMID:19608861
P35579_K1404	MYH9	HEEK*VAAYDK HEEK*VAAYDKLEK	MYH9_HUMAN Myosin-9 OS=Homo sapiens OX=9606 GN=MYH9 PE=1 SV=4	0.967793	Modified residue	Note=N6-acetyllysine;Ontology_term=ECO:0007744;evidence=ECO:0007744|PubMed:19608861;Dbxref=PMID:19608861
P35579_K1410	MYH9	VAAYDK*LEK	MYH9_HUMAN Myosin-9 OS=Homo sapiens OX=9606 GN=MYH9 PE=1 SV=4	1.17647	Modified residue	Note=N6-acetyllysine;Ontology_term=ECO:0007744;evidence=ECO:0007744|PubMed:19608861;Dbxref=PMID:19608861
P35579_K1441	MYH9	QSACNLEK*K	MYH9_HUMAN Myosin-9 OS=Homo sapiens OX=9606 GN=MYH9 PE=1 SV=4	0.811878
P35579_K1459	MYH9	TISAK*YAEER	MYH9_HUMAN Myosin-9 OS=Homo sapiens OX=9606 GN=MYH9 PE=1 SV=4	4.23935	Modified residue	Note=N6-acetyllysine;Ontology_term=ECO:0007744;evidence=ECO:0007744|PubMed:19608861;Dbxref=PMID:19608861
P35579_K1492	MYH9	ALEEAMEQK*AELER	MYH9_HUMAN Myosin-9 OS=Homo sapiens OX=9606 GN=MYH9 PE=1 SV=4	8.91742
P35579_K1513	MYH9	TEMEDLMSSK*DDVGK	MYH9_HUMAN Myosin-9 OS=Homo sapiens OX=9606 GN=MYH9 PE=1 SV=4	10
P35579_K1518	MYH9	DDVGK*SVHELEK	MYH9_HUMAN Myosin-9 OS=Homo sapiens OX=9606 GN=MYH9 PE=1 SV=4	0.90909
P35579_K1525	MYH9	SVHELEK*SK	MYH9_HUMAN Myosin-9 OS=Homo sapiens OX=9606 GN=MYH9 PE=1 SV=4	0.651968
P35579_K1620	MYH9	LEMDLK*DLEAHIDSANK	MYH9_HUMAN Myosin-9 OS=Homo sapiens OX=9606 GN=MYH9 PE=1 SV=4	4.40642
P35579_K1631	MYH9	DLEAHIDSANK*NR	MYH9_HUMAN Myosin-9 OS=Homo sapiens OX=9606 GN=MYH9 PE=1 SV=4	0.8
P35579_K1638	MYH9	DEAIK*QLR	MYH9_HUMAN Myosin-9 OS=Homo sapiens OX=9606 GN=MYH9 PE=1 SV=4	5.36743	Modified residue	Note=N6-acetyllysine;Ontology_term=ECO:0007744;evidence=ECO:0007744|PubMed:19608861;Dbxref=PMID:19608861
P35579_K1669	MYH9	EEILAQAK*ENEK	MYH9_HUMAN Myosin-9 OS=Homo sapiens OX=9606 GN=MYH9 PE=1 SV=4	4.77078	Modified residue	Note=N6-succinyllysine;Ontology_term=ECO:0000250;evidence=ECO:0000250|UniProtKB:Q8VDD5
P35579_K1724	MYH9	GALALEEK*R	MYH9_HUMAN Myosin-9 OS=Homo sapiens OX=9606 GN=MYH9 PE=1 SV=4	2.68387
P35579_K1775	MYH9	SHAQK*NENAR	MYH9_HUMAN Myosin-9 OS=Homo sapiens OX=9606 GN=MYH9 PE=1 SV=4	3.71513
P35579_K1793	MYH9	VK*LQEMEGTVK	MYH9_HUMAN Myosin-9 OS=Homo sapiens OX=9606 GN=MYH9 PE=1 SV=4	0.788872	Modified residue	Note=N6-acetyllysine;Ontology_term=ECO:0000250;evidence=ECO:0000250|UniProtKB:Q8VDD5
P35579_K1802	MYH9	LQEMEGTVK*SK	MYH9_HUMAN Myosin-9 OS=Homo sapiens OX=9606 GN=MYH9 PE=1 SV=4	3.76674	Modified residue	Note=N6-acetyllysine;Ontology_term=ECO:0000250;evidence=ECO:0000250|UniProtKB:Q8VDD5
P35579_K1835	MYH9	QAACK*QVR	MYH9_HUMAN Myosin-9 OS=Homo sapiens OX=9606 GN=MYH9 PE=1 SV=4	2.8943
P35579_K1845	MYH9	LK*DVLLQVDDERR	MYH9_HUMAN Myosin-9 OS=Homo sapiens OX=9606 GN=MYH9 PE=1 SV=4	0.9434	Modified residue	Note=N6-acetyllysine;Ontology_term=ECO:0000250;evidence=ECO:0000250|UniProtKB:Q8VDD5
P35579_K1862	MYH9	NAEQYK*DQADK	MYH9_HUMAN Myosin-9 OS=Homo sapiens OX=9606 GN=MYH9 PE=1 SV=4	5.3897
P35579_K1867	MYH9	NAEQYKDQADK*ASTR	MYH9_HUMAN Myosin-9 OS=Homo sapiens OX=9606 GN=MYH9 PE=1 SV=4	4.76488
P35579_K1918	MYH9	EVSSLK*NK	MYH9_HUMAN Myosin-9 OS=Homo sapiens OX=9606 GN=MYH9 PE=1 SV=4	0.834077
P35579_K202	MYH9	K*DQGELER	MYH9_HUMAN Myosin-9 OS=Homo sapiens OX=9606 GN=MYH9 PE=1 SV=4	0.70922
P35579_K30	MYH9	K*LVWVPSDK	MYH9_HUMAN Myosin-9 OS=Homo sapiens OX=9606 GN=MYH9 PE=1 SV=4	0.53191
P35579_K373	MYH9	NTDQASMPDNTAAQK*VSHLLGINVTDFTR	MYH9_HUMAN Myosin-9 OS=Homo sapiens OX=9606 GN=MYH9 PE=1 SV=4	10
P35579_K435	MYH9	INK*ALDK	MYH9_HUMAN Myosin-9 OS=Homo sapiens OX=9606 GN=MYH9 PE=1 SV=4	0.907036	Modified residue	Note=N6-acetyllysine;Ontology_term=ECO:0000250;evidence=ECO:0000250|UniProtKB:P35580
P35579_K545	MYH9	SFVEK*VMQEQGTHPK	MYH9_HUMAN Myosin-9 OS=Homo sapiens OX=9606 GN=MYH9 PE=1 SV=4	0.770588
P35579_K613	MYH9	FVSELWK*DVDR	MYH9_HUMAN Myosin-9 OS=Homo sapiens OX=9606 GN=MYH9 PE=1 SV=4	1.25	Modified residue	Note=N6-acetyllysine;Ontology_term=ECO:0000250;evidence=ECO:0000250|UniProtKB:Q8VDD5
P35579_K637	MYH9	IIGLDQVAGMSETALPGAFK*TR	MYH9_HUMAN Myosin-9 OS=Homo sapiens OX=9606 GN=MYH9 PE=1 SV=4	2.13699
P35579_K651	MYH9	TVGQLYK*EQLAK	MYH9_HUMAN Myosin-9 OS=Homo sapiens OX=9606 GN=MYH9 PE=1 SV=4	1.24037
P35579_K678	MYH9	CIIPNHEK*K	MYH9_HUMAN Myosin-9 OS=Homo sapiens OX=9606 GN=MYH9 PE=1 SV=4	1.03093
P35579_K760	MYH9	IGQSK*VFFR	MYH9_HUMAN Myosin-9 OS=Homo sapiens OX=9606 GN=MYH9 PE=1 SV=4	0.957572
P35579_K856	MYH9	EEELVK*VR	MYH9_HUMAN Myosin-9 OS=Homo sapiens OX=9606 GN=MYH9 PE=1 SV=4	2.9776
P35579_K860	MYH9	EK*QLAAENR	MYH9_HUMAN Myosin-9 OS=Homo sapiens OX=9606 GN=MYH9 PE=1 SV=4	3.04384	Modified residue	Note=N6-acetyllysine;Ontology_term=ECO:0000250;evidence=ECO:0000250|UniProtKB:Q8VDD5
P35579_K938	MYH9	CQHLQAEK*K	MYH9_HUMAN Myosin-9 OS=Homo sapiens OX=9606 GN=MYH9 PE=1 SV=4	7.48263
P35579_K966	MYH9	LQLEK*VTTEAK	MYH9_HUMAN Myosin-9 OS=Homo sapiens OX=9606 GN=MYH9 PE=1 SV=4	2.64731
P35579_K972	MYH9	VTTEAK*LK	MYH9_HUMAN Myosin-9 OS=Homo sapiens OX=9606 GN=MYH9 PE=1 SV=4	1.95685
P35580_K442	MYH10	INK*ALDR	MYH10_HUMAN Myosin-10 OS=Homo sapiens OX=9606 GN=MYH10 PE=1 SV=3	1.14943	Modified residue	Note=N6-acetyllysine;Ontology_term=ECO:0007744;evidence=ECO:0007744|PubMed:19608861;Dbxref=PMID:19608861
P35609_K405	ACTN2	LEHLAEK*FR	ACTN2_HUMAN Alpha-actinin-2 OS=Homo sapiens OX=9606 GN=ACTN2 PE=1 SV=1	10
P35749_K1417	MYH11	AAAYDK*LEK	MYH11_HUMAN Myosin-11 OS=Homo sapiens OX=9606 GN=MYH11 PE=1 SV=3	4.12913
P35998_K58	PSMC2	K*INELTGIK	PRS7_HUMAN 26S proteasome regulatory subunit 7 OS=Homo sapiens OX=9606 GN=PSMC2 PE=1 SV=3	0.75059
P36405_K11	ARL3	LK*SAPDQEVR	ARL3_HUMAN ADP-ribosylation factor-like protein 3 OS=Homo sapiens OX=9606 GN=ARL3 PE=1 SV=2	0.89286
P36551_K149	CPOX	RPGDMK*TK	HEM6_HUMAN Oxygen-dependent coproporphyrinogen-III oxidase, mitochondrial OS=Homo sapiens OX=9606 GN=CPOX PE=1 SV=3	0.12315
P36578_K106	RPL4	MFAPTK*TWR	RL4_HUMAN 60S ribosomal protein L4 OS=Homo sapiens OX=9606 GN=RPL4 PE=1 SV=5	0.909245	Modified residue	Note=N6-acetyllysine;Ontology_term=ECO:0007744;evidence=ECO:0007744|PubMed:19608861;Dbxref=PMID:19608861
P36578_K120	RPL4	VNTTQK*R	RL4_HUMAN 60S ribosomal protein L4 OS=Homo sapiens OX=9606 GN=RPL4 PE=1 SV=5	3.58807
P36578_K14	RPL4	PLISVYSEK*GESSGK	RL4_HUMAN 60S ribosomal protein L4 OS=Homo sapiens OX=9606 GN=RPL4 PE=1 SV=5	1.94514	Modified residue	Note=N6-acetyllysine;Ontology_term=ECO:0007744;evidence=ECO:0007744|PubMed:19608861;Dbxref=PMID:19608861
P36578_K294	RPL4	ILK*SPEIQR	RL4_HUMAN 60S ribosomal protein L4 OS=Homo sapiens OX=9606 GN=RPL4 PE=1 SV=5	9.53071
P36578_K333	RPL4	LNPYAK*TMR	RL4_HUMAN 60S ribosomal protein L4 OS=Homo sapiens OX=9606 GN=RPL4 PE=1 SV=5	7.69231	Modified residue	Note=N6-acetyllysine;Ontology_term=ECO:0007744;evidence=ECO:0007744|PubMed:19608861;Dbxref=PMID:19608861
P36578_K364	RPL4	AAAAAAALQAK*SDEK	RL4_HUMAN 60S ribosomal protein L4 OS=Homo sapiens OX=9606 GN=RPL4 PE=1 SV=5	1.18443	Modified residue$Cross-link	Note=N6-acetyllysine%3B alternate;Ontology_term=ECO:0000250;evidence=ECO:0000250|UniProtKB:Q9D8E6$Note=Glycyl lysine isopeptide (Lys-Gly) (interchain with G-Cter in SUMO1)%3B alternate;Ontology_term=ECO:0007744;evidence=ECO:0007744|PubMed:25114211;Dbxref=PMID:25114211
P36578_K423	RPL4	KPTTEEK*KPAA	RL4_HUMAN 60S ribosomal protein L4 OS=Homo sapiens OX=9606 GN=RPL4 PE=1 SV=5	10
P36776_K426	LONP1	LK*ELVVPK	LONM_HUMAN Lon protease homolog, mitochondrial OS=Homo sapiens OX=9606 GN=LONP1 PE=1 SV=2	5.88235
P36776_K559	LONP1	FSVGGMTDVAEIK*GHR	LONM_HUMAN Lon protease homolog, mitochondrial OS=Homo sapiens OX=9606 GN=LONP1 PE=1 SV=2	3.84676
P37198_K498	NUP62	K*VEEVTK	NUP62_HUMAN Nuclear pore glycoprotein p62 OS=Homo sapiens OX=9606 GN=NUP62 PE=1 SV=3	1.03093
P37235_K151	HPCAL1	TDK*IFR	HPCL1_HUMAN Hippocalcin-like protein 1 OS=Homo sapiens OX=9606 GN=HPCAL1 PE=1 SV=3	7.57275
P37235_K174	HPCAL1	GAK*SDPSIVR	HPCL1_HUMAN Hippocalcin-like protein 1 OS=Homo sapiens OX=9606 GN=HPCAL1 PE=1 SV=3	2.94137
P37802_K156	TAGLN2	SK*ENPR	TAGL2_HUMAN Transgelin-2 OS=Homo sapiens OX=9606 GN=TAGLN2 PE=1 SV=3	2.42984
P37802_K17	TAGLN2	EVQQK*IEK	TAGL2_HUMAN Transgelin-2 OS=Homo sapiens OX=9606 GN=TAGLN2 PE=1 SV=3	0.37048	Modified residue	Note=N6-acetyllysine;Ontology_term=ECO:0007744;evidence=ECO:0007744|PubMed:19608861;Dbxref=PMID:19608861
P37802_K40	TAGLN2	K*DVGRPQPGR	TAGL2_HUMAN Transgelin-2 OS=Homo sapiens OX=9606 GN=TAGLN2 PE=1 SV=3	5.39772
P37837_K115	TALDO1	LSFDK*DAMVAR	TALDO_HUMAN Transaldolase OS=Homo sapiens OX=9606 GN=TALDO1 PE=1 SV=2	4.81279	Modified residue	Note=N6-acetyllysine;Ontology_term=ECO:0000250;evidence=ECO:0000250|UniProtKB:Q93092
P37837_K203	TALDO1	ILDWHVANTDK*K	TALDO_HUMAN Transaldolase OS=Homo sapiens OX=9606 GN=TALDO1 PE=1 SV=2	10
P37837_K286	TALDO1	AAQASDLEK*IHLDEK	TALDO_HUMAN Transaldolase OS=Homo sapiens OX=9606 GN=TALDO1 PE=1 SV=2	1.0796	Modified residue	Note=N6-acetyllysine;Ontology_term=ECO:0007744;evidence=ECO:0007744|PubMed:19608861;Dbxref=PMID:19608861
P37837_K292	TALDO1	IHLDEK*SFR	TALDO_HUMAN Transaldolase OS=Homo sapiens OX=9606 GN=TALDO1 PE=1 SV=2	5.6976
P37837_K314	TALDO1	K*FAADAVK	TALDO_HUMAN Transaldolase OS=Homo sapiens OX=9606 GN=TALDO1 PE=1 SV=2	0.76336
P37837_K321	TALDO1	FAADAVK*LER	TALDO_HUMAN Transaldolase OS=Homo sapiens OX=9606 GN=TALDO1 PE=1 SV=2	2.72391	Modified residue	Note=N6-acetyllysine;Ontology_term=ECO:0007744;evidence=ECO:0007744|PubMed:19608861;Dbxref=PMID:19608861
P38159_K150	RBMX	GPLPVK*R	RBMX_HUMAN RNA-binding motif protein, X chromosome OS=Homo sapiens OX=9606 GN=RBMX PE=1 SV=3	4.40492
P38159_K217	RBMX	DDGYSTK*DSYSSR	RBMX_HUMAN RNA-binding motif protein, X chromosome OS=Homo sapiens OX=9606 GN=RBMX PE=1 SV=3	8.57143
P38606_K467	ATP6V1A	ALDEYYDK*HFTEFVPLR	VATA_HUMAN V-type proton ATPase catalytic subunit A OS=Homo sapiens OX=9606 GN=ATP6V1A PE=1 SV=2	5.3474
P38646_K106	HSPA9	LVGMPAK*R	GRP75_HUMAN Stress-70 protein, mitochondrial OS=Homo sapiens OX=9606 GN=HSPA9 PE=1 SV=2	1.2382
P38646_K206	HSPA9	QATK*DAGQISGLNVLR	GRP75_HUMAN Stress-70 protein, mitochondrial OS=Homo sapiens OX=9606 GN=HSPA9 PE=1 SV=2	7.79762	Modified residue	Note=N6-acetyllysine%3B alternate;Ontology_term=ECO:0000250;evidence=ECO:0000250|UniProtKB:P38647
P38646_K537	HSPA9	DK*GTGR	GRP75_HUMAN Stress-70 protein, mitochondrial OS=Homo sapiens OX=9606 GN=HSPA9 PE=1 SV=2	1.92308
P38646_K625	HSPA9	K*DSETGENIR	GRP75_HUMAN Stress-70 protein, mitochondrial OS=Homo sapiens OX=9606 GN=HSPA9 PE=1 SV=2	4.12901
P38919_K152	EIF4A3	K*LDYGQHVVAGTPGR	IF4A3_HUMAN Eukaryotic initiation factor 4A-III OS=Homo sapiens OX=9606 GN=EIF4A3 PE=1 SV=4	1.08696	Cross-link	Note=Glycyl lysine isopeptide (Lys-Gly) (interchain with G-Cter in SUMO2);Ontology_term=ECO:0000250;evidence=ECO:0000250|UniProtKB:P60842
P38919_K70	EIF4A3	AIK*QIIK	IF4A3_HUMAN Eukaryotic initiation factor 4A-III OS=Homo sapiens OX=9606 GN=EIF4A3 PE=1 SV=4	10
P39019_K111	RPS19	VLQALEGLK*MVEK	RS19_HUMAN 40S ribosomal protein S19 OS=Homo sapiens OX=9606 GN=RPS19 PE=1 SV=2	9.77444	Modified residue	Note=N6-acetyllysine;Ontology_term=ECO:0007744;evidence=ECO:0007744|PubMed:19608861;Dbxref=PMID:19608861
P39019_K143	RPS19	IAGQVAAANK*K	RS19_HUMAN 40S ribosomal protein S19 OS=Homo sapiens OX=9606 GN=RPS19 PE=1 SV=2	2.16463	Modified residue	Note=N6-succinyllysine;Ontology_term=ECO:0000250;evidence=ECO:0000250|UniProtKB:Q9CZX8
P39019_K97	RPS19	GSK*SVAR	RS19_HUMAN 40S ribosomal protein S19 OS=Homo sapiens OX=9606 GN=RPS19 PE=1 SV=2	8.33333
P39023_K115	RPL3	TVFAEHISDECK*R	RL3_HUMAN 60S ribosomal protein L3 OS=Homo sapiens OX=9606 GN=RPL3 PE=1 SV=2	0.746852
P39023_K136	RPL3	K*WQDEDGKK	RL3_HUMAN 60S ribosomal protein L3 OS=Homo sapiens OX=9606 GN=RPL3 PE=1 SV=2	9.12698	Modified residue	Note=N6-acetyllysine;Ontology_term=ECO:0000250;evidence=ECO:0000250|UniProtKB:P27659
P39023_K229	RPL3	GYK*GVTSR	RL3_HUMAN 60S ribosomal protein L3 OS=Homo sapiens OX=9606 GN=RPL3 PE=1 SV=2	0.84438
P39023_K272	RPL3	AGQK*GYHHR	RL3_HUMAN 60S ribosomal protein L3 OS=Homo sapiens OX=9606 GN=RPL3 PE=1 SV=2	0.87384
P39023_K30	RPL3	VK*SFPK	RL3_HUMAN 60S ribosomal protein L3 OS=Homo sapiens OX=9606 GN=RPL3 PE=1 SV=2	5
P39023_K362	RPL3	ALEK*IDLK	RL3_HUMAN 60S ribosomal protein L3 OS=Homo sapiens OX=9606 GN=RPL3 PE=1 SV=2	4.77464
P39023_K373	RPL3	FIDTTSK*FGHGR	RL3_HUMAN 60S ribosomal protein L3 OS=Homo sapiens OX=9606 GN=RPL3 PE=1 SV=2	1.21086	Modified residue	Note=N6-acetyllysine;Ontology_term=ECO:0000250;evidence=ECO:0000250|UniProtKB:P27659
P39023_K385	RPL3	FQTMEEK*K	RL3_HUMAN 60S ribosomal protein L3 OS=Homo sapiens OX=9606 GN=RPL3 PE=1 SV=2	0.800755
P39023_K5	RPL3	K*FSAPR	RL3_HUMAN 60S ribosomal protein L3 OS=Homo sapiens OX=9606 GN=RPL3 PE=1 SV=2	1.75621
P39086_K213	GRIK1	DAK*PLLK	GRIK1_HUMAN Glutamate receptor ionotropic, kainate 1 OS=Homo sapiens OX=9606 GN=GRIK1 PE=1 SV=1	0.45351
P39687_K68	ANP32A	K*LELSDNR	AN32A_HUMAN Acidic leucine-rich nuclear phosphoprotein 32 family member A OS=Homo sapiens OX=9606 GN=ANP32A PE=1 SV=1	1.14289
P39748_K252	FEN1	AVDLIQK*HK	FEN1_HUMAN Flap endonuclease 1 OS=Homo sapiens OX=9606 GN=FEN1 PE=1 SV=1	0.94215
P40121_K115	CAPG	GLK*YQEGGVESAFHK	CAPG_HUMAN Macrophage-capping protein OS=Homo sapiens OX=9606 GN=CAPG PE=1 SV=2	0.936338
P40121_K127	CAPG	YQEGGVESAFHK*TSTGAPAAIK	CAPG_HUMAN Macrophage-capping protein OS=Homo sapiens OX=9606 GN=CAPG PE=1 SV=2	1.24476
P40222_K233	TXLNA	GEHSK*AVLAR	TXLNA_HUMAN Alpha-taxilin OS=Homo sapiens OX=9606 GN=TXLNA PE=1 SV=3	0.4878
P40222_K256	TXLNA	SLK*EEGVQR	TXLNA_HUMAN Alpha-taxilin OS=Homo sapiens OX=9606 GN=TXLNA PE=1 SV=3	0.717837
P40227_K10	CCT6A	TLNPK*AEVAR	TCPZ_HUMAN T-complex protein 1 subunit zeta OS=Homo sapiens OX=9606 GN=CCT6A PE=1 SV=3	0.833855
P40227_K127	CCT6A	IITEGFEAAK*EK	TCPZ_HUMAN T-complex protein 1 subunit zeta OS=Homo sapiens OX=9606 GN=CCT6A PE=1 SV=3	1.09946
P40227_K199	CCT6A	HK*SETDTSLIR	TCPZ_HUMAN T-complex protein 1 subunit zeta OS=Homo sapiens OX=9606 GN=CCT6A PE=1 SV=3	0.625	Modified residue	Note=N6-acetyllysine;Ontology_term=ECO:0007744;evidence=ECO:0007744|PubMed:19608861;Dbxref=PMID:19608861
P40429_K103	RPL13A	LK*VFDGIPPPYDK	RL13A_HUMAN 60S ribosomal protein L13a OS=Homo sapiens OX=9606 GN=RPL13A PE=1 SV=2	2.93561
P40429_K134	RPL13A	K*FAYLGR	RL13A_HUMAN 60S ribosomal protein L13a OS=Homo sapiens OX=9606 GN=RPL13A PE=1 SV=2	3.06637
P40429_K191	RPL13A	KIDK*YTEVLK	RL13A_HUMAN 60S ribosomal protein L13a OS=Homo sapiens OX=9606 GN=RPL13A PE=1 SV=2	2.65711	Modified residue	Note=N6-acetyllysine;Ontology_term=ECO:0007744;evidence=ECO:0007744|PubMed:19608861;Dbxref=PMID:19608861
P40926_K157	MDH2	K*HGVYNPNK	MDHM_HUMAN Malate dehydrogenase, mitochondrial OS=Homo sapiens OX=9606 GN=MDH2 PE=1 SV=3	3.21963
P40926_K239	MDH2	IQEAGTEVVK*AK	MDHM_HUMAN Malate dehydrogenase, mitochondrial OS=Homo sapiens OX=9606 GN=MDH2 PE=1 SV=3	7.07602	Modified residue	Note=N6-acetyllysine%3B alternate;Ontology_term=ECO:0000250;evidence=ECO:0000250|UniProtKB:P08249
P40926_K301	MDH2	GIEK*NLGIGK	MDHM_HUMAN Malate dehydrogenase, mitochondrial OS=Homo sapiens OX=9606 GN=MDH2 PE=1 SV=3	1.17647	Modified residue	Note=N6-acetyllysine%3B alternate;Ontology_term=ECO:0000269,ECO:0007744;evidence=ECO:0000269|PubMed:20167786,ECO:0007744|PubMed:19608861;Dbxref=PMID:20167786,PMID:19608861
P40926_K329	MDH2	K*GEDFVK	MDHM_HUMAN Malate dehydrogenase, mitochondrial OS=Homo sapiens OX=9606 GN=MDH2 PE=1 SV=3	1.98245	Modified residue	Note=N6-acetyllysine%3B alternate;Ontology_term=ECO:0007744;evidence=ECO:0007744|PubMed:19608861;Dbxref=PMID:19608861
P40938_K20	RFC3	LDYHK*EQAAQLR	RFC3_HUMAN Replication factor C subunit 3 OS=Homo sapiens OX=9606 GN=RFC3 PE=1 SV=2	1.81818	Modified residue	Note=N6-acetyllysine;Ontology_term=ECO:0007744;evidence=ECO:0007744|PubMed:19608861;Dbxref=PMID:19608861
P40939_K163	HADHA	IATK*DR	ECHA_HUMAN Trifunctional enzyme subunit alpha, mitochondrial OS=Homo sapiens OX=9606 GN=HADHA PE=1 SV=2	7.8629
P40939_K386	HADHA	GLK*TILK	ECHA_HUMAN Trifunctional enzyme subunit alpha, mitochondrial OS=Homo sapiens OX=9606 GN=HADHA PE=1 SV=2	0.56497
P41091_K125	EIF2S3	GNFK*LVR	IF2G_HUMAN Eukaryotic translation initiation factor 2 subunit 3 OS=Homo sapiens OX=9606 GN=EIF2S3 PE=1 SV=3	5
P41091_K400	EIF2S3	LSK*NEVLMVNIGSLSTGGR	IF2G_HUMAN Eukaryotic translation initiation factor 2 subunit 3 OS=Homo sapiens OX=9606 GN=EIF2S3 PE=1 SV=3	10
P41091_K421	EIF2S3	VSAVK*ADLGK	IF2G_HUMAN Eukaryotic translation initiation factor 2 subunit 3 OS=Homo sapiens OX=9606 GN=EIF2S3 PE=1 SV=3	0.84746
P41223_K125	BUD31	SK*LEVGR	BUD31_HUMAN Protein BUD31 homolog OS=Homo sapiens OX=9606 GN=BUD31 PE=1 SV=2	9.09091	Modified residue	Note=N6-acetyllysine;Ontology_term=ECO:0007744;evidence=ECO:0007744|PubMed:19608861;Dbxref=PMID:19608861
P41250_K108	GARS1	VLEAK*ELALQPK	GARS_HUMAN Glycine--tRNA ligase OS=Homo sapiens OX=9606 GN=GARS1 PE=1 SV=3	3.35014
P41250_K204	GARS1	FADFMVK*DVK	GARS_HUMAN Glycine--tRNA ligase OS=Homo sapiens OX=9606 GN=GARS1 PE=1 SV=3	0.93458	Modified residue	Note=N6-acetyllysine;Ontology_term=ECO:0007744;evidence=ECO:0007744|PubMed:19608861;Dbxref=PMID:19608861
P41250_K426	GARS1	VGISPDK*LR	GARS_HUMAN Glycine--tRNA ligase OS=Homo sapiens OX=9606 GN=GARS1 PE=1 SV=3	1.23457
P41250_K646	GARS1	HGVSHK*VDDSSGSIGR	GARS_HUMAN Glycine--tRNA ligase OS=Homo sapiens OX=9606 GN=GARS1 PE=1 SV=3	1.4431
P41250_K99	GARS1	AVAELK*AR	GARS_HUMAN Glycine--tRNA ligase OS=Homo sapiens OX=9606 GN=GARS1 PE=1 SV=3	1.16833
P41252_K375	IARS1	DADK*SIIR	SYIC_HUMAN Isoleucine--tRNA ligase, cytoplasmic OS=Homo sapiens OX=9606 GN=IARS1 PE=1 SV=2	1.03093
P42166_K269	TMPO	GQLQK*LASER	LAP2A_HUMAN Lamina-associated polypeptide 2, isoform alpha OS=Homo sapiens OX=9606 GN=TMPO PE=1 SV=2	0.92593
P42166_K334	TMPO	EK*SGIQPLCPER	LAP2A_HUMAN Lamina-associated polypeptide 2, isoform alpha OS=Homo sapiens OX=9606 GN=TMPO PE=1 SV=2	0.89286
P42166_K356	TMPO	SHISDQSPLSSK*R	LAP2A_HUMAN Lamina-associated polypeptide 2, isoform alpha OS=Homo sapiens OX=9606 GN=TMPO PE=1 SV=2	3.55978
P42167_K213	TMPO	TPVTLK*QR	LAP2B_HUMAN Lamina-associated polypeptide 2, isoforms beta/gamma OS=Homo sapiens OX=9606 GN=TMPO PE=1 SV=2	10
P42167_K303	TMPO	VTGNFK*HASPILPITEFSDIPR	LAP2B_HUMAN Lamina-associated polypeptide 2, isoforms beta/gamma OS=Homo sapiens OX=9606 GN=TMPO PE=1 SV=2	5.18708
P42704_K1347	LRPPRC	ALYEHLTAK*NTK	LPPRC_HUMAN Leucine-rich PPR motif-containing protein, mitochondrial OS=Homo sapiens OX=9606 GN=LRPPRC PE=1 SV=3	1.5625
P42704_K287	LRPPRC	GDIDHVK*QTLEK	LPPRC_HUMAN Leucine-rich PPR motif-containing protein, mitochondrial OS=Homo sapiens OX=9606 GN=LRPPRC PE=1 SV=3	1.00361
P42704_K702	LRPPRC	ALELK*AK	LPPRC_HUMAN Leucine-rich PPR motif-containing protein, mitochondrial OS=Homo sapiens OX=9606 GN=LRPPRC PE=1 SV=3	0.81967
P42766_K25	RPL35	QLDDLK*VELSQLR	RL35_HUMAN 60S ribosomal protein L35 OS=Homo sapiens OX=9606 GN=RPL35 PE=1 SV=2	1.06773	Cross-link	Note=Glycyl lysine isopeptide (Lys-Gly) (interchain with G-Cter in SUMO2);Ontology_term=ECO:0007744;evidence=ECO:0007744|PubMed:28112733;Dbxref=PMID:28112733
P42766_K35	RPL35	VAK*VTGGAASK	RL35_HUMAN 60S ribosomal protein L35 OS=Homo sapiens OX=9606 GN=RPL35 PE=1 SV=2	0.766367
P42766_K43	RPL35	VTGGAASK*LSK	RL35_HUMAN 60S ribosomal protein L35 OS=Homo sapiens OX=9606 GN=RPL35 PE=1 SV=2	3.0303	Modified residue	Note=N6-acetyllysine;Ontology_term=ECO:0007744;evidence=ECO:0007744|PubMed:19608861;Dbxref=PMID:19608861
P42766_K66	RPL35	VLTVINQTQK*ENLR	RL35_HUMAN 60S ribosomal protein L35 OS=Homo sapiens OX=9606 GN=RPL35 PE=1 SV=2	1.71951
P42766_K97	RPL35	LNK*HEENLK	RL35_HUMAN 60S ribosomal protein L35 OS=Homo sapiens OX=9606 GN=RPL35 PE=1 SV=2	1.42971
P42892_K401	ECE1	K*TSSFLDQR	ECE1_HUMAN Endothelin-converting enzyme 1 OS=Homo sapiens OX=9606 GN=ECE1 PE=1 SV=2	1.05263	Disulfide bond	Ontology_term=ECO:0000255;evidence=ECO:0000255|PROSITE-ProRule:PRU01233
P42892_K747	ECE1	VIGSLSNSK*EFSEHFR	ECE1_HUMAN Endothelin-converting enzyme 1 OS=Homo sapiens OX=9606 GN=ECE1 PE=1 SV=2	4.33211	Disulfide bond	Ontology_term=ECO:0000255;evidence=ECO:0000255|PROSITE-ProRule:PRU01233
P43243_K588	MATR3	GIDLLK*K	MATR3_HUMAN Matrin-3 OS=Homo sapiens OX=9606 GN=MATR3 PE=1 SV=2	0.70098
P43487_K150	RANBP1	FLNAENAQK*FK	RANG_HUMAN Ran-specific GTPase-activating protein OS=Homo sapiens OX=9606 GN=RANBP1 PE=1 SV=1	2.22222	Modified residue	Note=N6-acetyllysine%3B alternate;Ontology_term=ECO:0007744;evidence=ECO:0007744|PubMed:19608861;Dbxref=PMID:19608861
P43490_K423	NAMPT	DPVADPNK*R	NAMPT_HUMAN Nicotinamide phosphoribosyltransferase OS=Homo sapiens OX=9606 GN=NAMPT PE=1 SV=1	5.26316
P45880_K285	VDAC2	SINAGGHK*VGLALELEA	VDAC2_HUMAN Voltage-dependent anion-selective channel protein 2 OS=Homo sapiens OX=9606 GN=VDAC2 PE=1 SV=2	8.86699	Cross-link	Note=Glycyl lysine isopeptide (Lys-Gly) (interchain with G-Cter in ubiquitin);Ontology_term=ECO:0000269;evidence=ECO:0000269|PubMed:25621951;Dbxref=PMID:25621951
P45974_K743	USP5	DQALK*ALR	UBP5_HUMAN Ubiquitin carboxyl-terminal hydrolase 5 OS=Homo sapiens OX=9606 GN=USP5 PE=1 SV=2	5	Disulfide bond	Ontology_term=ECO:0000269;evidence=ECO:0000269|Ref.23
P46734_K80	MAP2K3	GAYGVVEK*VR	MP2K3_HUMAN Dual specificity mitogen-activated protein kinase kinase 3 OS=Homo sapiens OX=9606 GN=MAP2K3 PE=1 SV=2	1.81818
P46776_K110	RPL27A	SGYYK*VLGK	RL27A_HUMAN 60S ribosomal protein L27a OS=Homo sapiens OX=9606 GN=RPL27A PE=1 SV=2	0.701427	Modified residue	Note=N6-acetyllysine;Ontology_term=ECO:0007744;evidence=ECO:0007744|PubMed:19608861;Dbxref=PMID:19608861
P46776_K27	RPL27A	K*HPGGR	RL27A_HUMAN 60S ribosomal protein L27a OS=Homo sapiens OX=9606 GN=RPL27A PE=1 SV=2	4.90998
P46776_K47	RPL27A	INFDK*YHPGYFGK	RL27A_HUMAN 60S ribosomal protein L27a OS=Homo sapiens OX=9606 GN=RPL27A PE=1 SV=2	0.37736	Modified residue	Note=N6-acetyllysine;Ontology_term=ECO:0007744;evidence=ECO:0007744|PubMed:19608861;Dbxref=PMID:19608861
P46776_K64	RPL27A	HYHLK*R	RL27A_HUMAN 60S ribosomal protein L27a OS=Homo sapiens OX=9606 GN=RPL27A PE=1 SV=2	0.7455
P46776_K92	RPL27A	VNAAK*NK	RL27A_HUMAN 60S ribosomal protein L27a OS=Homo sapiens OX=9606 GN=RPL27A PE=1 SV=2	0.997423
P46776_K94	RPL27A	NK*TGAAPIIDVVR	RL27A_HUMAN 60S ribosomal protein L27a OS=Homo sapiens OX=9606 GN=RPL27A PE=1 SV=2	0.476475
P46777_K178	RPL5	GAVDGGLSIPHSTK*R	RL5_HUMAN 60S ribosomal protein L5 OS=Homo sapiens OX=9606 GN=RPL5 PE=1 SV=3	6.74256
P46777_K188	RPL5	FPGYDSESK*EFNAEVHR	RL5_HUMAN 60S ribosomal protein L5 OS=Homo sapiens OX=9606 GN=RPL5 PE=1 SV=3	5.62256
P46777_K19	RPL5	YQVK*FR	RL5_HUMAN 60S ribosomal protein L5 OS=Homo sapiens OX=9606 GN=RPL5 PE=1 SV=3	4.03015
P46777_K242	RPL5	K*AHAAIR	RL5_HUMAN 60S ribosomal protein L5 OS=Homo sapiens OX=9606 GN=RPL5 PE=1 SV=3	3.38053
P46777_K27	RPL5	EGK*TDYYAR	RL5_HUMAN 60S ribosomal protein L5 OS=Homo sapiens OX=9606 GN=RPL5 PE=1 SV=3	4.43361
P46777_K41	RPL5	LVIQDK*NK	RL5_HUMAN 60S ribosomal protein L5 OS=Homo sapiens OX=9606 GN=RPL5 PE=1 SV=3	3.84952
P46777_K48	RPL5	YNTPK*YR	RL5_HUMAN 60S ribosomal protein L5 OS=Homo sapiens OX=9606 GN=RPL5 PE=1 SV=3	0.90306	Modified residue	Note=N6-acetyllysine;Ontology_term=ECO:0007744;evidence=ECO:0007744|PubMed:19608861;Dbxref=PMID:19608861
P46778_K36	RPL21	K*GDIVDIK	RL21_HUMAN 60S ribosomal protein L21 OS=Homo sapiens OX=9606 GN=RPL21 PE=1 SV=2	1.00273
P46779_K122	RPL28	SQK*PVMVK	RL28_HUMAN 60S ribosomal protein L28 OS=Homo sapiens OX=9606 GN=RPL28 PE=1 SV=3	1.52972
P46779_K19	RPL28	NCSSFLIK*R	RL28_HUMAN 60S ribosomal protein L28 OS=Homo sapiens OX=9606 GN=RPL28 PE=1 SV=3	0.642545
P46779_K47	RPL28	K*TVGVEPAADGK	RL28_HUMAN 60S ribosomal protein L28 OS=Homo sapiens OX=9606 GN=RPL28 PE=1 SV=3	4.05156
P46779_K84	RPL28	TTINK*NAR	RL28_HUMAN 60S ribosomal protein L28 OS=Homo sapiens OX=9606 GN=RPL28 PE=1 SV=3	8.71212
P46781_K11	RPS9	K*TYVTPR	RS9_HUMAN 40S ribosomal protein S9 OS=Homo sapiens OX=9606 GN=RPS9 PE=1 SV=3	0.82214
P46781_K155	RPS9	LDSQK*HIDFSLR	RS9_HUMAN 40S ribosomal protein S9 OS=Homo sapiens OX=9606 GN=RPS9 PE=1 SV=3	3.80892	Modified residue	Note=N6-acetyllysine;Ontology_term=ECO:0007744;evidence=ECO:0007744|PubMed:19608861;Dbxref=PMID:19608861
P46781_K30	RPS9	LDQELK*LIGEYGLR	RS9_HUMAN 40S ribosomal protein S9 OS=Homo sapiens OX=9606 GN=RPS9 PE=1 SV=3	6.11111
P46781_K66	RPS9	ELLTLDEK*DPR	RS9_HUMAN 40S ribosomal protein S9 OS=Homo sapiens OX=9606 GN=RPS9 PE=1 SV=3	5.83333	Modified residue	Note=N6-acetyllysine;Ontology_term=ECO:0000250;evidence=ECO:0000250|UniProtKB:Q6ZWN5
P46781_K91	RPS9	IGVLDEGK*MK	RS9_HUMAN 40S ribosomal protein S9 OS=Homo sapiens OX=9606 GN=RPS9 PE=1 SV=3	0.883402
P46782_K201	RPS5	VAK*SNR	RS5_HUMAN 40S ribosomal protein S5 OS=Homo sapiens OX=9606 GN=RPS5 PE=1 SV=4	1.24666
P46782_K63	RPS5	K*AQCPIVER	RS5_HUMAN 40S ribosomal protein S5 OS=Homo sapiens OX=9606 GN=RPS5 PE=1 SV=4	0.593167
P46783_K139	RPS10	K*AEAGAGSATEFQFR	RS10_HUMAN 40S ribosomal protein S10 OS=Homo sapiens OX=9606 GN=RPS10 PE=1 SV=1	10	Cross-link	Note=Glycyl lysine isopeptide (Lys-Gly) (interchain with G-Cter in ubiquitin);Ontology_term=ECO:0000269,ECO:0000269;evidence=ECO:0000269|PubMed:28065601,ECO:0000269|PubMed:28132843;Dbxref=PMID:28065601,PMID:28132843
P46937_K315	YAP1	LQQLQMEK*ER	YAP1_HUMAN Transcriptional coactivator YAP1 OS=Homo sapiens OX=9606 GN=YAP1 PE=1 SV=2	1.02041
P46937_K321	YAP1	LK*QQELLR	YAP1_HUMAN Transcriptional coactivator YAP1 OS=Homo sapiens OX=9606 GN=YAP1 PE=1 SV=2	1.82852
P46940_K1128	IQGAP1	LPYDVTPEQALAHEEVK*TR	IQGA1_HUMAN Ras GTPase-activating-like protein IQGAP1 OS=Homo sapiens OX=9606 GN=IQGAP1 PE=1 SV=1	4.9145
P46940_K1168	IQGAP1	VLK*DSLHEK	IQGA1_HUMAN Ras GTPase-activating-like protein IQGAP1 OS=Homo sapiens OX=9606 GN=IQGAP1 PE=1 SV=1	0.85812
P46940_K1389	IQGAP1	TILLNTK*R	IQGA1_HUMAN Ras GTPase-activating-like protein IQGAP1 OS=Homo sapiens OX=9606 GN=IQGAP1 PE=1 SV=1	8.47838
P46940_K1465	IQGAP1	K*LTELGTVDPK	IQGA1_HUMAN Ras GTPase-activating-like protein IQGAP1 OS=Homo sapiens OX=9606 GN=IQGAP1 PE=1 SV=1	1.02041
P46940_K1477	IQGAP1	NK*YQELINDIAR	IQGA1_HUMAN Ras GTPase-activating-like protein IQGAP1 OS=Homo sapiens OX=9606 GN=IQGAP1 PE=1 SV=1	0.76336
P46940_K348	IQGAP1	GLQQQNSDWYLK*QLLSDK	IQGA1_HUMAN Ras GTPase-activating-like protein IQGAP1 OS=Homo sapiens OX=9606 GN=IQGAP1 PE=1 SV=1	6.25
P46940_K51	IQGAP1	QNVAYEYLCHLEEAK*R	IQGA1_HUMAN Ras GTPase-activating-like protein IQGAP1 OS=Homo sapiens OX=9606 GN=IQGAP1 PE=1 SV=1	5.71895
P46940_K806	IQGAP1	SHK*DEVVK	IQGA1_HUMAN Ras GTPase-activating-like protein IQGAP1 OS=Homo sapiens OX=9606 GN=IQGAP1 PE=1 SV=1	0.559525
P46940_K811	IQGAP1	SHKDEVVK*IQSLAR	IQGA1_HUMAN Ras GTPase-activating-like protein IQGAP1 OS=Homo sapiens OX=9606 GN=IQGAP1 PE=1 SV=1	0.836297
P46940_K935	IQGAP1	ITLQDVVSHSK*K	IQGA1_HUMAN Ras GTPase-activating-like protein IQGAP1 OS=Homo sapiens OX=9606 GN=IQGAP1 PE=1 SV=1	0.5814
P47755_K97	CAPZA2	ICFK*FDHLR	CAZA2_HUMAN F-actin-capping protein subunit alpha-2 OS=Homo sapiens OX=9606 GN=CAPZA2 PE=1 SV=3	5.88235
P47756_K223	CAPZB	LVEDMENK*IR	CAPZB_HUMAN F-actin-capping protein subunit beta OS=Homo sapiens OX=9606 GN=CAPZB PE=1 SV=4	7.20566
P47756_K235	CAPZB	STLNEIYFGK*TK	CAPZB_HUMAN F-actin-capping protein subunit beta OS=Homo sapiens OX=9606 GN=CAPZB PE=1 SV=4	2.99573	Modified residue	Note=N6-acetyllysine;Ontology_term=ECO:0007744;evidence=ECO:0007744|PubMed:19608861;Dbxref=PMID:19608861
P47914_K103	RPL29	LAYIAHPK*LGK	RL29_HUMAN 60S ribosomal protein L29 OS=Homo sapiens OX=9606 GN=RPL29 PE=1 SV=2	5.10284
P47914_K149	RPL29	AQAAAPASVPAQAPK*R	RL29_HUMAN 60S ribosomal protein L29 OS=Homo sapiens OX=9606 GN=RPL29 PE=1 SV=2	5.88235
P47914_K33	RPL29	YESLK*GVDPK	RL29_HUMAN 60S ribosomal protein L29 OS=Homo sapiens OX=9606 GN=RPL29 PE=1 SV=2	8.2754	Modified residue	Note=N6-acetyllysine;Ontology_term=ECO:0007744;evidence=ECO:0007744|PubMed:19608861;Dbxref=PMID:19608861
P47914_K38	RPL29	GVDPK*FLR	RL29_HUMAN 60S ribosomal protein L29 OS=Homo sapiens OX=9606 GN=RPL29 PE=1 SV=2	4.54469
P48047_K192	ATP5PO	IGEK*YVDMSVK	ATPO_HUMAN ATP synthase subunit O, mitochondrial OS=Homo sapiens OX=9606 GN=ATP5PO PE=1 SV=1	0.8547	Modified residue	Note=N6-acetyllysine;Ontology_term=ECO:0007744;evidence=ECO:0007744|PubMed:19608861;Dbxref=PMID:19608861
P48047_K70	ATP5PO	VAQILK*EPK	ATPO_HUMAN ATP synthase subunit O, mitochondrial OS=Homo sapiens OX=9606 GN=ATP5PO PE=1 SV=1	0.88496	Modified residue	Note=N6-acetyllysine;Ontology_term=ECO:0000250;evidence=ECO:0000250|UniProtKB:Q9DB20
P48047_K98	ATP5PO	SLNDITAK*ER	ATPO_HUMAN ATP synthase subunit O, mitochondrial OS=Homo sapiens OX=9606 GN=ATP5PO PE=1 SV=1	1.13651
P48444_K142	ARCN1	TFTEMDSHEEK*VFR	COPD_HUMAN Coatomer subunit delta OS=Homo sapiens OX=9606 GN=ARCN1 PE=1 SV=1	7.73809
P48444_K309	ARCN1	ISDDK*YGR	COPD_HUMAN Coatomer subunit delta OS=Homo sapiens OX=9606 GN=ARCN1 PE=1 SV=1	5.26316	Modified residue	Note=N6-acetyllysine;Ontology_term=ECO:0007744;evidence=ECO:0007744|PubMed:19608861;Dbxref=PMID:19608861
P48444_K322	ARCN1	LHVENEDK*K	COPD_HUMAN Coatomer subunit delta OS=Homo sapiens OX=9606 GN=ARCN1 PE=1 SV=1	0.86427
P48509_K249	CD151	SLK*LEHY	CD151_HUMAN CD151 antigen OS=Homo sapiens OX=9606 GN=CD151 PE=1 SV=3	1.10581
P48637_K364	GSS	FVLK*PQR	GSHB_HUMAN Glutathione synthetase OS=Homo sapiens OX=9606 GN=GSS PE=1 SV=1	5.48402
P48643_K214	CCT5	VEGK*VGGR	TCPE_HUMAN T-complex protein 1 subunit epsilon OS=Homo sapiens OX=9606 GN=CCT5 PE=1 SV=1	0.6025	Cross-link	Note=Glycyl lysine isopeptide (Lys-Gly) (interchain with G-Cter in SUMO2);Ontology_term=ECO:0007744;evidence=ECO:0007744|PubMed:28112733;Dbxref=PMID:28112733
P48643_K223	CCT5	LEDTK*LIK	TCPE_HUMAN T-complex protein 1 subunit epsilon OS=Homo sapiens OX=9606 GN=CCT5 PE=1 SV=1	0.642184
P48643_K392	CCT5	GGNK*MIIEEAK	TCPE_HUMAN T-complex protein 1 subunit epsilon OS=Homo sapiens OX=9606 GN=CCT5 PE=1 SV=1	0.68027	Cross-link	Note=Glycyl lysine isopeptide (Lys-Gly) (interchain with G-Cter in SUMO2);Ontology_term=ECO:0007744;evidence=ECO:0007744|PubMed:28112733;Dbxref=PMID:28112733
P48643_K529	CCT5	MILK*IDDIR	TCPE_HUMAN T-complex protein 1 subunit epsilon OS=Homo sapiens OX=9606 GN=CCT5 PE=1 SV=1	9.40171
P48960_K281	ADGRE5	FFDK*VQDLGR	AGRE5_HUMAN Adhesion G protein-coupled receptor E5 OS=Homo sapiens OX=9606 GN=ADGRE5 PE=1 SV=4	3.08201
P48960_K343	ADGRE5	ILAK*SLPK	AGRE5_HUMAN Adhesion G protein-coupled receptor E5 OS=Homo sapiens OX=9606 GN=ADGRE5 PE=1 SV=4	1.18763
P49207_K108	RPL34	VLK*AQAQSQK	RL34_HUMAN 60S ribosomal protein L34 OS=Homo sapiens OX=9606 GN=RPL34 PE=1 SV=3	0.888938	Cross-link	Note=Glycyl lysine isopeptide (Lys-Gly) (interchain with G-Cter in SUMO2);Ontology_term=ECO:0007744;evidence=ECO:0007744|PubMed:28112733;Dbxref=PMID:28112733
P49207_K115	RPL34	AQAQSQK*AK	RL34_HUMAN 60S ribosomal protein L34 OS=Homo sapiens OX=9606 GN=RPL34 PE=1 SV=3	0.64103
P49207_K19	RPL34	LSYNTASNK*TR	RL34_HUMAN 60S ribosomal protein L34 OS=Homo sapiens OX=9606 GN=RPL34 PE=1 SV=3	3.37066
P49207_K36	RPL34	IVYLYTK*K	RL34_HUMAN 60S ribosomal protein L34 OS=Homo sapiens OX=9606 GN=RPL34 PE=1 SV=3	10	Modified residue	Note=N6-acetyllysine;Ontology_term=ECO:0007744;evidence=ECO:0007744|PubMed:19608861;Dbxref=PMID:19608861
P49207_K43	RPL34	APK*SACGVCPGR	RL34_HUMAN 60S ribosomal protein L34 OS=Homo sapiens OX=9606 GN=RPL34 PE=1 SV=3	0.420565	Modified residue	Note=N6-acetyllysine;Ontology_term=ECO:0000250;evidence=ECO:0000250|UniProtKB:Q9D1R9
P49257_K346	LMAN1	IHLEIK*QLNR	LMAN1_HUMAN Protein ERGIC-53 OS=Homo sapiens OX=9606 GN=LMAN1 PE=1 SV=2	10
P49327_K1704	FASN	VFTTVGSAEK*R	FAS_HUMAN Fatty acid synthase OS=Homo sapiens OX=9606 GN=FASN PE=1 SV=3	2.49072	Modified residue	Note=N6-(pyridoxal phosphate)lysine%3B alternate;Ontology_term=ECO:0000250;evidence=ECO:0000250
P49327_K2186	FASN	K*LQELSSK	FAS_HUMAN Fatty acid synthase OS=Homo sapiens OX=9606 GN=FASN PE=1 SV=3	0.662353
P49327_K673	FASN	EGVFAK*EVR	FAS_HUMAN Fatty acid synthase OS=Homo sapiens OX=9606 GN=FASN PE=1 SV=3	1.37922	Modified residue	Note=N6-acetyllysine;Ontology_term=ECO:0007744;evidence=ECO:0007744|PubMed:19608861;Dbxref=PMID:19608861
P49327_K70	FASN	FDASFFGVHPK*QAHTMDPQLR	FAS_HUMAN Fatty acid synthase OS=Homo sapiens OX=9606 GN=FASN PE=1 SV=3	5.88235	Modified residue	Note=N6-acetyllysine;Ontology_term=ECO:0007744;evidence=ECO:0007744|PubMed:19608861;Dbxref=PMID:19608861
P49368_K21	CCT3	K*VQSGNINAAK	TCPG_HUMAN T-complex protein 1 subunit gamma OS=Homo sapiens OX=9606 GN=CCT3 PE=1 SV=4	4.89035
P49368_K222	CCT3	GVMINK*DVTHPR	TCPG_HUMAN T-complex protein 1 subunit gamma OS=Homo sapiens OX=9606 GN=CCT3 PE=1 SV=4	1.1236	Modified residue	Note=N6-acetyllysine;Ontology_term=ECO:0007744;evidence=ECO:0007744|PubMed:19608861;Dbxref=PMID:19608861
P49368_K234	CCT3	YIK*NPR	TCPG_HUMAN T-complex protein 1 subunit gamma OS=Homo sapiens OX=9606 GN=CCT3 PE=1 SV=4	4.81602
P49368_K249	CCT3	K*GESQTDIEITR	TCPG_HUMAN T-complex protein 1 subunit gamma OS=Homo sapiens OX=9606 GN=CCT3 PE=1 SV=4	1.03614	Cross-link	Note=Glycyl lysine isopeptide (Lys-Gly) (interchain with G-Cter in SUMO2);Ontology_term=ECO:0007744;evidence=ECO:0007744|PubMed:28112733;Dbxref=PMID:28112733
P49368_K353	CCT3	IVSRPEELREDDVGTGAGLLEIK*K	TCPG_HUMAN T-complex protein 1 subunit gamma OS=Homo sapiens OX=9606 GN=CCT3 PE=1 SV=4	0.64986
P49368_K354	CCT3	IVSRPEELREDDVGTGAGLLEIKK*	TCPG_HUMAN T-complex protein 1 subunit gamma OS=Homo sapiens OX=9606 GN=CCT3 PE=1 SV=4	0.57143
P49368_K381	CCT3	GASK*EILSEVER	TCPG_HUMAN T-complex protein 1 subunit gamma OS=Homo sapiens OX=9606 GN=CCT3 PE=1 SV=4	3.69743	Cross-link	Note=Glycyl lysine isopeptide (Lys-Gly) (interchain with G-Cter in SUMO2);Ontology_term=ECO:0007744;evidence=ECO:0007744|PubMed:25114211;Dbxref=PMID:25114211
P49368_K527	CCT3	IDDIVSGHK*K	TCPG_HUMAN T-complex protein 1 subunit gamma OS=Homo sapiens OX=9606 GN=CCT3 PE=1 SV=4	2.49558
P49368_K78	CCT3	EIQVQHPAAK*SMIEISR	TCPG_HUMAN T-complex protein 1 subunit gamma OS=Homo sapiens OX=9606 GN=CCT3 PE=1 SV=4	0.78125
P49411_K311	TUFM	TVVTGIEMFHK*SLER	EFTU_HUMAN Elongation factor Tu, mitochondrial OS=Homo sapiens OX=9606 GN=TUFM PE=1 SV=2	6.36539
P49411_K88	TUFM	ILAEGGGAK*FK	EFTU_HUMAN Elongation factor Tu, mitochondrial OS=Homo sapiens OX=9606 GN=TUFM PE=1 SV=2	1.08465	Modified residue	Note=N6-acetyllysine%3B alternate;Ontology_term=ECO:0007744;evidence=ECO:0007744|PubMed:19608861;Dbxref=PMID:19608861
P49458_K30	SRP9	VVLK*YR	SRP09_HUMAN Signal recognition particle 9 kDa protein OS=Homo sapiens OX=9606 GN=SRP9 PE=1 SV=2	0.442485
P49588_K338	AARS1	YAHEK*LNASR	SYAC_HUMAN Alanine--tRNA ligase, cytoplasmic OS=Homo sapiens OX=9606 GN=AARS1 PE=1 SV=2	4.90998
P49591_K12	SARS1	VDK*GGDPALIR	SYSC_HUMAN Serine--tRNA ligase, cytoplasmic OS=Homo sapiens OX=9606 GN=SARS1 PE=1 SV=3	5.26316
P49720_K77	PSMB3	LNLYELK*EGR	PSB3_HUMAN Proteasome subunit beta type-3 OS=Homo sapiens OX=9606 GN=PSMB3 PE=1 SV=2	2.11984	Modified residue	Note=N6-acetyllysine;Ontology_term=ECO:0007744;evidence=ECO:0007744|PubMed:19608861;Dbxref=PMID:19608861
P49736_K216	MCM2	THVDSHGHNVFK*ER	MCM2_HUMAN DNA replication licensing factor MCM2 OS=Homo sapiens OX=9606 GN=MCM2 PE=1 SV=4	5.59676	Modified residue	Note=N6-acetyllysine;Ontology_term=ECO:0007744;evidence=ECO:0007744|PubMed:19608861;Dbxref=PMID:19608861
P49748_K51	ACADVL	AGGAAQLALDK*SDSHPSDALTR	ACADV_HUMAN Very long-chain specific acyl-CoA dehydrogenase, mitochondrial OS=Homo sapiens OX=9606 GN=ACADVL PE=1 SV=1	5.55556	Modified residue	Note=N6-acetyllysine;Ontology_term=ECO:0000250;evidence=ECO:0000250|UniProtKB:P50544
P49755_K127	TMED10	IPDQLVILDMK*HGVEAK	TMEDA_HUMAN Transmembrane emp24 domain-containing protein 10 OS=Homo sapiens OX=9606 GN=TMED10 PE=1 SV=2	3.35526
P49755_K133	TMED10	HGVEAK*NYEEIAK	TMEDA_HUMAN Transmembrane emp24 domain-containing protein 10 OS=Homo sapiens OX=9606 GN=TMED10 PE=1 SV=2	1.30187
P49755_K143	TMED10	VEK*LKPLEVELR	TMEDA_HUMAN Transmembrane emp24 domain-containing protein 10 OS=Homo sapiens OX=9606 GN=TMED10 PE=1 SV=2	0.502267
P49755_K145	TMED10	LK*PLEVELR	TMEDA_HUMAN Transmembrane emp24 domain-containing protein 10 OS=Homo sapiens OX=9606 GN=TMED10 PE=1 SV=2	3.33333
P49773_K21	HINT1	PGGDTIFGK*IIR	HINT1_HUMAN Histidine triad nucleotide-binding protein 1 OS=Homo sapiens OX=9606 GN=HINT1 PE=1 SV=2	4.33831	Modified residue	Note=N6-acetyllysine;Ontology_term=ECO:0007744;evidence=ECO:0007744|PubMed:19608861;Dbxref=PMID:19608861
P49792_K776	RANBP2	NADSEIK*HSTPSPTR	RBP2_HUMAN E3 SUMO-protein ligase RanBP2 OS=Homo sapiens OX=9606 GN=RANBP2 PE=1 SV=2	1.11111
P50213_K339	IDH3A	DGK*SLTK	IDH3A_HUMAN Isocitrate dehydrogenase [NAD] subunit alpha, mitochondrial OS=Homo sapiens OX=9606 GN=IDH3A PE=1 SV=1	1.49254
P50395_K112	GDI2	VTEGSFVYK*GGK	GDIB_HUMAN Rab GDP dissociation inhibitor beta OS=Homo sapiens OX=9606 GN=GDI2 PE=1 SV=2	0.40849	Modified residue	Note=N6-acetyllysine;Ontology_term=ECO:0007744;evidence=ECO:0007744|PubMed:19608861;Dbxref=PMID:19608861
P50395_K164	GDI2	TFEGIDPK*K	GDIB_HUMAN Rab GDP dissociation inhibitor beta OS=Homo sapiens OX=9606 GN=GDI2 PE=1 SV=2	1.15153
P50395_K269	GDI2	VIGVK*SEGEIAR	GDIB_HUMAN Rab GDP dissociation inhibitor beta OS=Homo sapiens OX=9606 GN=GDI2 PE=1 SV=2	5.99336	Modified residue	Note=N6-acetyllysine;Ontology_term=ECO:0007744;evidence=ECO:0007744|PubMed:19608861;Dbxref=PMID:19608861
P50395_K293	GDI2	VEK*VGQVIR	GDIB_HUMAN Rab GDP dissociation inhibitor beta OS=Homo sapiens OX=9606 GN=GDI2 PE=1 SV=2	0.93458
P50395_K435	GDI2	MTGSEFDFEEMK*R	GDIB_HUMAN Rab GDP dissociation inhibitor beta OS=Homo sapiens OX=9606 GN=GDI2 PE=1 SV=2	8.23413
P50454_K190	SERPINH1	LPEVTK*DVER	SERPH_HUMAN Serpin H1 OS=Homo sapiens OX=9606 GN=SERPINH1 PE=1 SV=2	3.74762
P50454_K287	SERPINH1	LLTK*EQLK	SERPH_HUMAN Serpin H1 OS=Homo sapiens OX=9606 GN=SERPINH1 PE=1 SV=2	0.338987
P50454_K334	SERPINH1	NK*ADLSR	SERPH_HUMAN Serpin H1 OS=Homo sapiens OX=9606 GN=SERPINH1 PE=1 SV=2	2.38095
P50454_K39	SERPINH1	LSPK*AATLAER	SERPH_HUMAN Serpin H1 OS=Homo sapiens OX=9606 GN=SERPINH1 PE=1 SV=2	2.38435
P50502_K118	ST13	K*VAAIEALNDGELQK	F10A1_HUMAN Hsc70-interacting protein OS=Homo sapiens OX=9606 GN=ST13 PE=1 SV=2	0.81141
P50502_K230	ST13	AQK*IAEHR	F10A1_HUMAN Hsc70-interacting protein OS=Homo sapiens OX=9606 GN=ST13 PE=1 SV=2	1.39488
P50502_K5	ST13	K*VNELR	F10A1_HUMAN Hsc70-interacting protein OS=Homo sapiens OX=9606 GN=ST13 PE=1 SV=2	1.44928
P50552_K276	VASP	K*ATQVGEK	VASP_HUMAN Vasodilator-stimulated phosphoprotein OS=Homo sapiens OX=9606 GN=VASP PE=1 SV=3	1.13636
P50552_K312	VASP	RPWEK*NSTTLPR	VASP_HUMAN Vasodilator-stimulated phosphoprotein OS=Homo sapiens OX=9606 GN=VASP PE=1 SV=3	10
P50570_K299	DNM2	SK*LQSQLLSLEK	DYN2_HUMAN Dynamin-2 OS=Homo sapiens OX=9606 GN=DNM2 PE=1 SV=2	5.88235	Modified residue	Note=N6-acetyllysine;Ontology_term=ECO:0000250;evidence=ECO:0000250|UniProtKB:P39054
P50851_K1806	LRBA	LEHALEK*AAPLLR	LRBA_HUMAN Lipopolysaccharide-responsive and beige-like anchor protein OS=Homo sapiens OX=9606 GN=LRBA PE=1 SV=4	7.14286
P50897_K191	PPT1	LVQAEYWHDPIK*EDVYR	PPT1_HUMAN Palmitoyl-protein thioesterase 1 OS=Homo sapiens OX=9606 GN=PPT1 PE=1 SV=1	5
P50914_K124	RPL14	IIK*NEVK	RL14_HUMAN 60S ribosomal protein L14 OS=Homo sapiens OX=9606 GN=RPL14 PE=1 SV=4	2.22222	Cross-link	Note=Glycyl lysine isopeptide (Lys-Gly) (interchain with G-Cter in SUMO2);Ontology_term=ECO:0007744,ECO:0007744;evidence=ECO:0007744|PubMed:25218447,ECO:0007744|PubMed:28112733;Dbxref=PMID:25218447,PMID:28112733
P50914_K137	RPL14	AALLK*ASPK	RL14_HUMAN 60S ribosomal protein L14 OS=Homo sapiens OX=9606 GN=RPL14 PE=1 SV=4	5
P50914_K182	RPL14	VPAQK*ATGQK	RL14_HUMAN 60S ribosomal protein L14 OS=Homo sapiens OX=9606 GN=RPL14 PE=1 SV=4	1.01398
P50914_K187	RPL14	ATGQK*AAPAPK	RL14_HUMAN 60S ribosomal protein L14 OS=Homo sapiens OX=9606 GN=RPL14 PE=1 SV=4	3.37244
P50914_K204	RPL14	APAQK*APAPK	RL14_HUMAN 60S ribosomal protein L14 OS=Homo sapiens OX=9606 GN=RPL14 PE=1 SV=4	7.60049	Modified residue	Note=N6-succinyllysine;Ontology_term=ECO:0000250;evidence=ECO:0000250|UniProtKB:Q9CR57
P50914_K79	RPL14	QAWQK*ADINTK	RL14_HUMAN 60S ribosomal protein L14 OS=Homo sapiens OX=9606 GN=RPL14 PE=1 SV=4	1.486	Modified residue	Note=N6-acetyllysine;Ontology_term=ECO:0007744;evidence=ECO:0007744|PubMed:19608861;Dbxref=PMID:19608861
P50914_K85	RPL14	ADINTK*WAATR	RL14_HUMAN 60S ribosomal protein L14 OS=Homo sapiens OX=9606 GN=RPL14 PE=1 SV=4	1.20482	Modified residue	Note=N6-acetyllysine%3B alternate;Ontology_term=ECO:0007744;evidence=ECO:0007744|PubMed:19608861;Dbxref=PMID:19608861
P50990_K16	CCT8	APGFAQMLK*EGAK	TCPQ_HUMAN T-complex protein 1 subunit theta OS=Homo sapiens OX=9606 GN=CCT8 PE=1 SV=4	9.09091
P50990_K20	CCT8	EGAK*HFSGLEEAVYR	TCPQ_HUMAN T-complex protein 1 subunit theta OS=Homo sapiens OX=9606 GN=CCT8 PE=1 SV=4	0.79064
P50990_K318	CCT8	LNSK*WDLR	TCPQ_HUMAN T-complex protein 1 subunit theta OS=Homo sapiens OX=9606 GN=CCT8 PE=1 SV=4	4.00646	Modified residue	Note=N6-acetyllysine;Ontology_term=ECO:0007744;evidence=ECO:0007744|PubMed:19608861;Dbxref=PMID:19608861
P50990_K37	CCT8	NIQACK*ELAQTTR	TCPQ_HUMAN T-complex protein 1 subunit theta OS=Homo sapiens OX=9606 GN=CCT8 PE=1 SV=4	1.21951
P50990_K400	CCT8	AVDDGVNTFK*VLTR	TCPQ_HUMAN T-complex protein 1 subunit theta OS=Homo sapiens OX=9606 GN=CCT8 PE=1 SV=4	7.9046	Modified residue	Note=N6-acetyllysine;Ontology_term=ECO:0007744;evidence=ECO:0007744|PubMed:19608861;Dbxref=PMID:19608861
P50991_K21	CCT4	GK*GAYQDR	TCPD_HUMAN T-complex protein 1 subunit delta OS=Homo sapiens OX=9606 GN=CCT4 PE=1 SV=4	1.02041	Modified residue	Note=N6-acetyllysine;Ontology_term=ECO:0000250;evidence=ECO:0000250|UniProtKB:P80315
P50991_K42	CCT4	FSNISAAK*AVADAIR	TCPD_HUMAN T-complex protein 1 subunit delta OS=Homo sapiens OX=9606 GN=CCT4 PE=1 SV=4	9.09091
P50991_K489	CCT4	HAQGEK*TAGINVR	TCPD_HUMAN T-complex protein 1 subunit delta OS=Homo sapiens OX=9606 GN=CCT4 PE=1 SV=4	9.09091
P50991_K531	CCT4	SILK*IDDVVNTR	TCPD_HUMAN T-complex protein 1 subunit delta OS=Homo sapiens OX=9606 GN=CCT4 PE=1 SV=4	10
P50991_K55	CCT4	TSLGPK*GMDK	TCPD_HUMAN T-complex protein 1 subunit delta OS=Homo sapiens OX=9606 GN=CCT4 PE=1 SV=4	1.41564
P50995_K408	ANXA11	DIEK*SICR	ANX11_HUMAN Annexin A11 OS=Homo sapiens OX=9606 GN=ANXA11 PE=1 SV=1	0.917105
P50995_K450	ANXA11	GAGTK*DR	ANX11_HUMAN Annexin A11 OS=Homo sapiens OX=9606 GN=ANXA11 PE=1 SV=1	0.83333
P51572_K138	BCAP31	K*QAESASEAAK	BAP31_HUMAN B-cell receptor-associated protein 31 OS=Homo sapiens OX=9606 GN=BCAP31 PE=1 SV=3	1.03799
P51572_K159	BCAP31	K*GAAVDGGK	BAP31_HUMAN B-cell receptor-associated protein 31 OS=Homo sapiens OX=9606 GN=BCAP31 PE=1 SV=3	5
P51665_K199	PSMD7	ITNQVHGLK*GLNSK	PSMD7_HUMAN 26S proteasome non-ATPase regulatory subunit 7 OS=Homo sapiens OX=9606 GN=PSMD7 PE=1 SV=2	3.80952
P51665_K214	PSMD7	SYLEK*VATGK	PSMD7_HUMAN 26S proteasome non-ATPase regulatory subunit 7 OS=Homo sapiens OX=9606 GN=PSMD7 PE=1 SV=2	1.36367	Modified residue	Note=N6-acetyllysine;Ontology_term=ECO:0007744;evidence=ECO:0007744|PubMed:19608861;Dbxref=PMID:19608861
P51858_K105	HDGF	ASGYQSSQK*K	HDGF_HUMAN Hepatoma-derived growth factor OS=Homo sapiens OX=9606 GN=HDGF PE=1 SV=1	0.37414	Disulfide bond	Ontology_term=ECO:0000250;evidence=ECO:0000250|UniProtKB:P51859
P52209_K261	PGD	DSAGQK*GTGK	6PGD_HUMAN 6-phosphogluconate dehydrogenase, decarboxylating OS=Homo sapiens OX=9606 GN=PGD PE=1 SV=3	0.45872
P52272_K134	HNRNPM	AAEVLNK*HSLSGR	HNRPM_HUMAN Heterogeneous nuclear ribonucleoprotein M OS=Homo sapiens OX=9606 GN=HNRNPM PE=1 SV=3	4.86644	Modified residue$Cross-link	Note=N6-acetyllysine%3B alternate;Ontology_term=ECO:0000250;evidence=ECO:0000250|UniProtKB:Q9D0E1$Note=Glycyl lysine isopeptide (Lys-Gly) (interchain with G-Cter in SUMO2)%3B alternate;Ontology_term=ECO:0007744;evidence=ECO:0007744|PubMed:28112733;Dbxref=PMID:28112733
P52272_K277	HNRNPM	PMHVK*MDER	HNRPM_HUMAN Heterogeneous nuclear ribonucleoprotein M OS=Homo sapiens OX=9606 GN=HNRNPM PE=1 SV=3	1.81895	Modified residue$Cross-link	Note=N6-acetyllysine%3B alternate;Ontology_term=ECO:0007744;evidence=ECO:0007744|PubMed:19608861;Dbxref=PMID:19608861$Note=Glycyl lysine isopeptide (Lys-Gly) (interchain with G-Cter in SUMO2)%3B alternate;Ontology_term=ECO:0007744;evidence=ECO:0007744|PubMed:28112733;Dbxref=PMID:28112733
P52272_K381	HNRNPM	INEILSNALK*R	HNRPM_HUMAN Heterogeneous nuclear ribonucleoprotein M OS=Homo sapiens OX=9606 GN=HNRNPM PE=1 SV=3	8.21549	Cross-link	Note=Glycyl lysine isopeptide (Lys-Gly) (interchain with G-Cter in SUMO2);Ontology_term=ECO:0007744;evidence=ECO:0007744|PubMed:28112733;Dbxref=PMID:28112733
P52272_K388	HNRNPM	GEIIAK*QGGGGGGGSVPGIER	HNRPM_HUMAN Heterogeneous nuclear ribonucleoprotein M OS=Homo sapiens OX=9606 GN=HNRNPM PE=1 SV=3	3.05315	Cross-link	Note=Glycyl lysine isopeptide (Lys-Gly) (interchain with G-Cter in SUMO2);Ontology_term=ECO:0007744,ECO:0007744;evidence=ECO:0007744|PubMed:25218447,ECO:0007744|PubMed:28112733;Dbxref=PMID:25218447,PMID:28112733
P52272_K69	HNRNPM	FEPYANPTK*R	HNRPM_HUMAN Heterogeneous nuclear ribonucleoprotein M OS=Homo sapiens OX=9606 GN=HNRNPM PE=1 SV=3	1.30701	Cross-link	Note=Glycyl lysine isopeptide (Lys-Gly) (interchain with G-Cter in SUMO2);Ontology_term=ECO:0007744;evidence=ECO:0007744|PubMed:28112733;Dbxref=PMID:28112733
P52272_K698	HNRNPM	GCGVVK*FESPEVAER	HNRPM_HUMAN Heterogeneous nuclear ribonucleoprotein M OS=Homo sapiens OX=9606 GN=HNRNPM PE=1 SV=3	0.61532	Modified residue$Cross-link	Note=N6-acetyllysine%3B alternate;Ontology_term=ECO:0007744;evidence=ECO:0007744|PubMed:19608861;Dbxref=PMID:19608861$Note=Glycyl lysine isopeptide (Lys-Gly) (interchain with G-Cter in SUMO1)%3B alternate;Ontology_term=ECO:0007744;evidence=ECO:0007744|PubMed:25114211;Dbxref=PMID:25114211
P52362_K703	U31	QK*LATK	LTP_HHV7J Large tegument protein deneddylase OS=Human herpesvirus 7 (strain JI) OX=57278 GN=U31 PE=3 SV=1	1.05643
P52565_K178	ARHGDIA	GSYSIK*SR	GDIR1_HUMAN Rho GDP-dissociation inhibitor 1 OS=Homo sapiens OX=9606 GN=ARHGDIA PE=1 SV=3	0.993088	Modified residue	Note=N6-acetyllysine;Ontology_term=ECO:0007744;evidence=ECO:0007744|PubMed:19608861;Dbxref=PMID:19608861
P52565_K52	ARHGDIA	YK*EALLGR	GDIR1_HUMAN Rho GDP-dissociation inhibitor 1 OS=Homo sapiens OX=9606 GN=ARHGDIA PE=1 SV=3	8.77604
P52566_K135	ARHGDIB	TGVK*VDK	GDIR2_HUMAN Rho GDP-dissociation inhibitor 2 OS=Homo sapiens OX=9606 GN=ARHGDIB PE=1 SV=3	0.8547
P52597_K98	HNRNPF	TEMDWVLK*HSGPNSADSANDGFVR	HNRPF_HUMAN Heterogeneous nuclear ribonucleoprotein F OS=Homo sapiens OX=9606 GN=HNRNPF PE=1 SV=3	8.49673
P52701_K1315	MSH6	LANLPEEVIQK*GHR	MSH6_HUMAN DNA mismatch repair protein Msh6 OS=Homo sapiens OX=9606 GN=MSH6 PE=1 SV=2	0.729836
P52788_K265	SMS	YAK*EGR	SPSY_HUMAN Spermine synthase OS=Homo sapiens OX=9606 GN=SMS PE=1 SV=2	6.78733
P52907_K103	CAPZA1	K*EASDPQPEEADGGLK	CAZA1_HUMAN F-actin-capping protein subunit alpha-1 OS=Homo sapiens OX=9606 GN=CAPZA1 PE=1 SV=3	6.47774
P52907_K13	CAPZA1	VSDEEK*VR	CAZA1_HUMAN F-actin-capping protein subunit alpha-1 OS=Homo sapiens OX=9606 GN=CAPZA1 PE=1 SV=3	5.88235
P52907_K19	CAPZA1	IAAK*FITHAPPGEFNEVFNDVR	CAZA1_HUMAN F-actin-capping protein subunit alpha-1 OS=Homo sapiens OX=9606 GN=CAPZA1 PE=1 SV=3	6.25	Modified residue	Note=N6-acetyllysine;Ontology_term=ECO:0007744;evidence=ECO:0007744|PubMed:19608861;Dbxref=PMID:19608861
P53007_K255	SLC25A1	MQGLEAHK*YR	TXTP_HUMAN Tricarboxylate transport protein, mitochondrial OS=Homo sapiens OX=9606 GN=SLC25A1 PE=1 SV=2	0.960275
P53041_K158	PPP5C	AIAGDEHK*R	PPP5_HUMAN Serine/threonine-protein phosphatase 5 OS=Homo sapiens OX=9606 GN=PPP5C PE=1 SV=1	1
P53367_K146	ARFIP1	QIISEK*LGR	ARFP1_HUMAN Arfaptin-1 OS=Homo sapiens OX=9606 GN=ARFIP1 PE=1 SV=2	1.42857
P53396_K1080	ACLY	LK*QGLYR	ACLY_HUMAN ATP-citrate synthase OS=Homo sapiens OX=9606 GN=ACLY PE=1 SV=3	1.47569
P53396_K151	ACLY	AQK*LLVGVDEK	ACLY_HUMAN ATP-citrate synthase OS=Homo sapiens OX=9606 GN=ACLY PE=1 SV=3	3.56879
P53396_K780	ACLY	NQALK*EAGVFVPR	ACLY_HUMAN ATP-citrate synthase OS=Homo sapiens OX=9606 GN=ACLY PE=1 SV=3	10
P53396_K97	ACLY	LGQEATVGK*ATGFLK	ACLY_HUMAN ATP-citrate synthase OS=Homo sapiens OX=9606 GN=ACLY PE=1 SV=3	7.14286
P53618_K107	COPB1	K*DLQHPNEFIR	COPB_HUMAN Coatomer subunit beta OS=Homo sapiens OX=9606 GN=COPB1 PE=1 SV=3	0.394445
P53618_K190	COPB1	DASCK*R	COPB_HUMAN Coatomer subunit beta OS=Homo sapiens OX=9606 GN=COPB1 PE=1 SV=3	0.487645
P53618_K309	COPB1	LIELK*EHPAHER	COPB_HUMAN Coatomer subunit beta OS=Homo sapiens OX=9606 GN=COPB1 PE=1 SV=3	1.07271
P53618_K712	COPB1	EAADPLASK*LNK	COPB_HUMAN Coatomer subunit beta OS=Homo sapiens OX=9606 GN=COPB1 PE=1 SV=3	0.949255
P53794_K555	SLC5A3	NLVVK*ENCSPK	SC5A3_HUMAN Sodium/myo-inositol cotransporter OS=Homo sapiens OX=9606 GN=SLC5A3 PE=1 SV=2	0.91301
P53999_K53	SUB1	ALSSSK*QSSSSR	TCP4_HUMAN Activated RNA polymerase II transcriptional coactivator p15 OS=Homo sapiens OX=9606 GN=SUB1 PE=1 SV=3	2.61601	Modified residue	Note=N6-acetyllysine;Ontology_term=ECO:0000250;evidence=ECO:0000250|UniProtKB:P11031
P54819_K147	AK2	LIHPK*SGR	KAD2_HUMAN Adenylate kinase 2, mitochondrial OS=Homo sapiens OX=9606 GN=AK2 PE=1 SV=2	6.25
P54886_K424	ALDH18A1	LAAPLLK*R	P5CS_HUMAN Delta-1-pyrroline-5-carboxylate synthase OS=Homo sapiens OX=9606 GN=ALDH18A1 PE=1 SV=2	5.08391
P54886_K643	ALDH18A1	VEQVK*IHAGPK	P5CS_HUMAN Delta-1-pyrroline-5-carboxylate synthase OS=Homo sapiens OX=9606 GN=ALDH18A1 PE=1 SV=2	0.54945
P55060_K158	CSE1L	TAHSLFK*R	XPO2_HUMAN Exportin-2 OS=Homo sapiens OX=9606 GN=CSE1L PE=1 SV=3	1.54841
P55060_K17	CSE1L	K*TLDPDPAIR	XPO2_HUMAN Exportin-2 OS=Homo sapiens OX=9606 GN=CSE1L PE=1 SV=3	0.86877
P55060_K839	CSE1L	VSGNVEK*K	XPO2_HUMAN Exportin-2 OS=Homo sapiens OX=9606 GN=CSE1L PE=1 SV=3	1.12373
P55072_K148	VCP	K*GDIFLVR	TERA_HUMAN Transitional endoplasmic reticulum ATPase OS=Homo sapiens OX=9606 GN=VCP PE=1 SV=4	3.96367
P55072_K18	VCP	GDDLSTAILK*QK	TERA_HUMAN Transitional endoplasmic reticulum ATPase OS=Homo sapiens OX=9606 GN=VCP PE=1 SV=4	10	Cross-link	Note=Glycyl lysine isopeptide (Lys-Gly) (interchain with G-Cter in SUMO2);Ontology_term=ECO:0007744;evidence=ECO:0007744|PubMed:28112733;Dbxref=PMID:28112733
P55072_K236	VCP	AIGVK*PPR	TERA_HUMAN Transitional endoplasmic reticulum ATPase OS=Homo sapiens OX=9606 GN=VCP PE=1 SV=4	5.75658
P55072_K288	VCP	K*AFEEAEK	TERA_HUMAN Transitional endoplasmic reticulum ATPase OS=Homo sapiens OX=9606 GN=VCP PE=1 SV=4	1.59053
P55072_K502	VCP	ELQELVQYPVEHPDK*FLK	TERA_HUMAN Transitional endoplasmic reticulum ATPase OS=Homo sapiens OX=9606 GN=VCP PE=1 SV=4	5.88235	Modified residue	Note=N6-acetyllysine;Ontology_term=ECO:0000250;evidence=ECO:0000250|UniProtKB:Q01853
P55072_K565	VCP	EIFDK*AR	TERA_HUMAN Transitional endoplasmic reticulum ATPase OS=Homo sapiens OX=9606 GN=VCP PE=1 SV=4	8.4989
P55072_K60	VCP	GDTVLLK*GK	TERA_HUMAN Transitional endoplasmic reticulum ATPase OS=Homo sapiens OX=9606 GN=VCP PE=1 SV=4	7.69231
P55072_K651	VCP	LDQLIYIPLPDEK*SR	TERA_HUMAN Transitional endoplasmic reticulum ATPase OS=Homo sapiens OX=9606 GN=VCP PE=1 SV=4	5.88235
P55072_K754	VCP	K*YEMFAQTLQQSR	TERA_HUMAN Transitional endoplasmic reticulum ATPase OS=Homo sapiens OX=9606 GN=VCP PE=1 SV=4	7.54807	Modified residue	Note=N6-acetyllysine;Ontology_term=ECO:0000250;evidence=ECO:0000250|UniProtKB:Q01853
P55145_K157	MANF	GCAEK*SDYIR	MANF_HUMAN Mesencephalic astrocyte-derived neurotrophic factor OS=Homo sapiens OX=9606 GN=MANF PE=1 SV=3	7.17949
P55145_K45	MANF	FYQDLK*DR	MANF_HUMAN Mesencephalic astrocyte-derived neurotrophic factor OS=Homo sapiens OX=9606 GN=MANF PE=1 SV=3	4.43018	Disulfide bond	Ontology_term=ECO:0000269;evidence=ECO:0000269|PubMed:19258449;Dbxref=PMID:19258449
P55209_K194	NAP1L1	NVDLLSDMVQEHDEPILK*HLK	NP1L1_HUMAN Nucleosome assembly protein 1-like 1 OS=Homo sapiens OX=9606 GN=NAP1L1 PE=1 SV=1	5.57033
P55209_K271	NAP1L1	NVTLK*TIK	NP1L1_HUMAN Nucleosome assembly protein 1-like 1 OS=Homo sapiens OX=9606 GN=NAP1L1 PE=1 SV=1	0.5102
P55209_K82	NAP1L1	VNALK*NLQVK	NP1L1_HUMAN Nucleosome assembly protein 1-like 1 OS=Homo sapiens OX=9606 GN=NAP1L1 PE=1 SV=1	0.618976
P55769_K86	SNU13	SK*QALGR	NH2L1_HUMAN NHP2-like protein 1 OS=Homo sapiens OX=9606 GN=SNU13 PE=1 SV=3	0.53476	Site	Note=Interaction with U4 snRNA and U4atac snRNA;Ontology_term=ECO:0000269,ECO:0000269;evidence=ECO:0000269|PubMed:17412961,ECO:0000269|PubMed:21784869;Dbxref=PMID:17412961,PMID:21784869
P55854_K32	SUMO3	VAGQDGSVVQFK*IK	SUMO3_HUMAN Small ubiquitin-related modifier 3 OS=Homo sapiens OX=9606 GN=SUMO3 PE=1 SV=2	1.02041
P55884_K213	EIF3B	IFSK*FGK	EIF3B_HUMAN Eukaryotic translation initiation factor 3 subunit B OS=Homo sapiens OX=9606 GN=EIF3B PE=1 SV=3	0.86207
P55884_K257	EIF3B	LDK*QHTFR	EIF3B_HUMAN Eukaryotic translation initiation factor 3 subunit B OS=Homo sapiens OX=9606 GN=EIF3B PE=1 SV=3	1.09644
P55884_K693	EIF3B	LLQK*NNK	EIF3B_HUMAN Eukaryotic translation initiation factor 3 subunit B OS=Homo sapiens OX=9606 GN=EIF3B PE=1 SV=3	10
P55884_K734	EIF3B	IFEQK*DR	EIF3B_HUMAN Eukaryotic translation initiation factor 3 subunit B OS=Homo sapiens OX=9606 GN=EIF3B PE=1 SV=3	0.69391
P55884_K741	EIF3B	LSQSK*ASK	EIF3B_HUMAN Eukaryotic translation initiation factor 3 subunit B OS=Homo sapiens OX=9606 GN=EIF3B PE=1 SV=3	0.38462
P56192_K491	MARS1	DGLK*PR	SYMC_HUMAN Methionine--tRNA ligase, cytoplasmic OS=Homo sapiens OX=9606 GN=MARS1 PE=1 SV=2	0.737535
P57088_K129	TMEM33	K*VLDAR	TMM33_HUMAN Transmembrane protein 33 OS=Homo sapiens OX=9606 GN=TMEM33 PE=1 SV=2	0.992073
P58546_K90	MTPN	LLLSK*GADK	MTPN_HUMAN Myotrophin OS=Homo sapiens OX=9606 GN=MTPN PE=1 SV=2	1.08889
P58876_K6	H2BC5	PEPTK*SAPAPK	H2B1D_HUMAN Histone H2B type 1-D OS=Homo sapiens OX=9606 GN=H2BC5 PE=1 SV=2	4.46964	Modified residue$Cross-link	Note=N6-(2-hydroxyisobutyryl)lysine%3B alternate;Ontology_term=ECO:0000269;evidence=ECO:0000269|PubMed:24681537;Dbxref=PMID:24681537$Note=Glycyl lysine isopeptide (Lys-Gly) (interchain with G-Cter in SUMO2)%3B alternate;Ontology_term=ECO:0007744,ECO:0007744;evidence=ECO:0007744|PubMed:25755297,ECO:0007744|PubMed:28112733;Dbxref=PMID:25755297,PMID:28112733
P60059_K16	SEC61G	QFVK*DSIR	SC61G_HUMAN Protein transport protein Sec61 subunit gamma OS=Homo sapiens OX=9606 GN=SEC61G PE=1 SV=1	0.49505
P60174_K142	TPI1	EAGITEK*VVFEQTK	TPIS_HUMAN Triosephosphate isomerase OS=Homo sapiens OX=9606 GN=TPI1 PE=1 SV=4	7.79762	Cross-link	Note=Glycyl lysine isopeptide (Lys-Gly) (interchain with G-Cter in SUMO1);Ontology_term=ECO:0007744;evidence=ECO:0007744|PubMed:25114211;Dbxref=PMID:25114211
P60174_K156	TPI1	VIADNVK*DWSK	TPIS_HUMAN Triosephosphate isomerase OS=Homo sapiens OX=9606 GN=TPI1 PE=1 SV=4	3.00559	Modified residue	Note=N6-acetyllysine%3B alternate;Ontology_term=ECO:0000250;evidence=ECO:0000250|UniProtKB:P17751
P60174_K175	TPI1	VVLAYEPVWAIGTGK*TATPQQAQEVHEK	TPIS_HUMAN Triosephosphate isomerase OS=Homo sapiens OX=9606 GN=TPI1 PE=1 SV=4	3.24904
P60174_K188	TPI1	TATPQQAQEVHEK*LR	TPIS_HUMAN Triosephosphate isomerase OS=Homo sapiens OX=9606 GN=TPI1 PE=1 SV=4	1.51336
P60228_K120	EIF3E	MLFDYLADK*HGFR	EIF3E_HUMAN Eukaryotic translation initiation factor 3 subunit E OS=Homo sapiens OX=9606 GN=EIF3E PE=1 SV=1	7.67774
P60228_K275	EIF3E	QVLK*DLVK	EIF3E_HUMAN Eukaryotic translation initiation factor 3 subunit E OS=Homo sapiens OX=9606 GN=EIF3E PE=1 SV=1	1.1364
P60468_K20	SEC61B	SPSK*AVAAR	SC61B_HUMAN Protein transport protein Sec61 subunit beta OS=Homo sapiens OX=9606 GN=SEC61B PE=1 SV=2	1.13901
P60468_K35	SEC61B	K*NASCGTR	SC61B_HUMAN Protein transport protein Sec61 subunit beta OS=Homo sapiens OX=9606 GN=SEC61B PE=1 SV=2	0.729455
P60660_K26	MYL6	TGDGK*ILYSQCGDVMR	MYL6_HUMAN Myosin light polypeptide 6 OS=Homo sapiens OX=9606 GN=MYL6 PE=1 SV=2	10
P60660_K50	MYL6	ALGQNPTNAEVLK*VLGNPK	MYL6_HUMAN Myosin light polypeptide 6 OS=Homo sapiens OX=9606 GN=MYL6 PE=1 SV=2	2.06726
P60660_K79	MYL6	VLDFEHFLPMLQTVAK*NK	MYL6_HUMAN Myosin light polypeptide 6 OS=Homo sapiens OX=9606 GN=MYL6 PE=1 SV=2	0.793225
P60660_K81	MYL6	NK*DQGTYEDYVEGLR	MYL6_HUMAN Myosin light polypeptide 6 OS=Homo sapiens OX=9606 GN=MYL6 PE=1 SV=2	0.771415	Modified residue	Note=N6-acetyllysine;Ontology_term=ECO:0007744;evidence=ECO:0007744|PubMed:19608861;Dbxref=PMID:19608861
P60660_K98	MYL6	VFDK*EGNGTVMGAEIR	MYL6_HUMAN Myosin light polypeptide 6 OS=Homo sapiens OX=9606 GN=MYL6 PE=1 SV=2	4.6139
P60709_K113	ACTB	VAPEEHPVLLTEAPLNPK*ANR	ACTB_HUMAN Actin, cytoplasmic 1 OS=Homo sapiens OX=9606 GN=ACTB PE=1 SV=1	1.81818
P60709_K18	ACTB	MDDDIAALVVDNGSGMCK*AGFAGDDAPR	ACTB_HUMAN Actin, cytoplasmic 1 OS=Homo sapiens OX=9606 GN=ACTB PE=1 SV=1	9.09091
P60709_K291	ACTB	K*DLYANTVLSGGTTMYPGIADR	ACTB_HUMAN Actin, cytoplasmic 1 OS=Homo sapiens OX=9606 GN=ACTB PE=1 SV=1	0.98124
P60763_K166	RAC3	GLK*TVFDEAIR	RAC3_HUMAN Ras-related C3 botulinum toxin substrate 3 OS=Homo sapiens OX=9606 GN=RAC3 PE=1 SV=1	1.86219
P60763_K96	RAC3	AK*WYPEVR	RAC3_HUMAN Ras-related C3 botulinum toxin substrate 3 OS=Homo sapiens OX=9606 GN=RAC3 PE=1 SV=1	6.25
P60842_K146	EIF4A1	AEVQK*LQMEAPHIIVGTPGR	IF4A1_HUMAN Eukaryotic initiation factor 4A-I OS=Homo sapiens OX=9606 GN=EIF4A1 PE=1 SV=1	1.91383	Cross-link	Note=Glycyl lysine isopeptide (Lys-Gly) (interchain with G-Cter in SUMO2);Ontology_term=ECO:0007744;evidence=ECO:0007744|PubMed:28112733;Dbxref=PMID:28112733
P60842_K174	EIF4A1	YLSPK*YIK	IF4A1_HUMAN Eukaryotic initiation factor 4A-I OS=Homo sapiens OX=9606 GN=EIF4A1 PE=1 SV=1	2.39882	Modified residue	Note=N6-acetyllysine;Ontology_term=ECO:0007744;evidence=ECO:0007744|PubMed:19608861;Dbxref=PMID:19608861
P60842_K238	EIF4A1	K*EELTLEGIR	IF4A1_HUMAN Eukaryotic initiation factor 4A-I OS=Homo sapiens OX=9606 GN=EIF4A1 PE=1 SV=1	0.78125	Modified residue$Cross-link	Note=N6-acetyllysine%3B alternate;Ontology_term=ECO:0000250;evidence=ECO:0000250|UniProtKB:P60843$Note=Glycyl lysine isopeptide (Lys-Gly) (interchain with G-Cter in SUMO2)%3B alternate;Ontology_term=ECO:0007744;evidence=ECO:0007744|PubMed:28112733;Dbxref=PMID:28112733
P60842_K309	EIF4A1	DFTVSAMHGDMDQK*ER	IF4A1_HUMAN Eukaryotic initiation factor 4A-I OS=Homo sapiens OX=9606 GN=EIF4A1 PE=1 SV=1	6.41418	Cross-link	Note=Glycyl lysine isopeptide (Lys-Gly) (interchain with G-Cter in SUMO2);Ontology_term=ECO:0007744;evidence=ECO:0007744|PubMed:28112733;Dbxref=PMID:28112733
P60842_K381	EIF4A1	KGVAINMVTEEDK*R	IF4A1_HUMAN Eukaryotic initiation factor 4A-I OS=Homo sapiens OX=9606 GN=EIF4A1 PE=1 SV=1	1.03772	Cross-link	Note=Glycyl lysine isopeptide (Lys-Gly) (interchain with G-Cter in SUMO2);Ontology_term=ECO:0007744;evidence=ECO:0007744|PubMed:28112733;Dbxref=PMID:28112733
P60866_K59	RPS20	MPTK*TLR	RS20_HUMAN 40S ribosomal protein S20 OS=Homo sapiens OX=9606 GN=RPS20 PE=1 SV=1	1.24702
P60903_K18	S100A10	K*FAGDK	S10AA_HUMAN Protein S100-A10 OS=Homo sapiens OX=9606 GN=S100A10 PE=1 SV=2	0.07797
P60903_K23	S100A10	FAGDK*GYLTK	S10AA_HUMAN Protein S100-A10 OS=Homo sapiens OX=9606 GN=S100A10 PE=1 SV=2	0.734865	Modified residue	Note=N6-acetyllysine;Ontology_term=ECO:0007744;evidence=ECO:0007744|PubMed:19608861;Dbxref=PMID:19608861
P60903_K28	S100A10	GYLTK*EDLR FAGDKGYLTK*EDLR	S10AA_HUMAN Protein S100-A10 OS=Homo sapiens OX=9606 GN=S100A10 PE=1 SV=2	0.252322	Modified residue	Note=N6-acetyllysine;Ontology_term=ECO:0007744;evidence=ECO:0007744|PubMed:19608861;Dbxref=PMID:19608861
P60903_K37	S100A10	VLMEK*EFPGFLENQKDPLAVDK	S10AA_HUMAN Protein S100-A10 OS=Homo sapiens OX=9606 GN=S100A10 PE=1 SV=2	0.572755	Modified residue$Cross-link	Note=N6-acetyllysine%3B alternate;Ontology_term=ECO:0007744;evidence=ECO:0007744|PubMed:19608861;Dbxref=PMID:19608861$Note=Glycyl lysine isopeptide (Lys-Gly) (interchain with G-Cter in SUMO2)%3B alternate;Ontology_term=ECO:0007744;evidence=ECO:0007744|PubMed:28112733;Dbxref=PMID:28112733
P60903_K47	S100A10	EFPGFLENQK*DPLAVDK	S10AA_HUMAN Protein S100-A10 OS=Homo sapiens OX=9606 GN=S100A10 PE=1 SV=2	0.8
P60903_K54	S100A10	EFPGFLENQKDPLAVDK*IMK	S10AA_HUMAN Protein S100-A10 OS=Homo sapiens OX=9606 GN=S100A10 PE=1 SV=2	0.799238	Modified residue	Note=N6-acetyllysine;Ontology_term=ECO:0007744;evidence=ECO:0007744|PubMed:19608861;Dbxref=PMID:19608861
P60903_K57	S100A10	IMK*DLDQCR	S10AA_HUMAN Protein S100-A10 OS=Homo sapiens OX=9606 GN=S100A10 PE=1 SV=2	0.44259	Modified residue	Note=N6-acetyllysine;Ontology_term=ECO:0007744;evidence=ECO:0007744|PubMed:19608861;Dbxref=PMID:19608861
P60981_K127	DSTN	K*FQGIK	DEST_HUMAN Destrin OS=Homo sapiens OX=9606 GN=DSTN PE=1 SV=3	1.71083
P60981_K19	DSTN	IFYDMK*VR	DEST_HUMAN Destrin OS=Homo sapiens OX=9606 GN=DSTN PE=1 SV=3	1.14593	Modified residue	Note=N6-acetyllysine;Ontology_term=ECO:0007744;evidence=ECO:0007744|PubMed:19608861;Dbxref=PMID:19608861
P61077_K8	UBE2D3	INK*ELSDLAR	UB2D3_HUMAN Ubiquitin-conjugating enzyme E2 D3 OS=Homo sapiens OX=9606 GN=UBE2D3 PE=1 SV=1	3.86181
P61088_K10	UBE2N	IIK*ETQR	UBE2N_HUMAN Ubiquitin-conjugating enzyme E2 N OS=Homo sapiens OX=9606 GN=UBE2N PE=1 SV=1	2.7341
P61088_K24	UBE2N	LLAEPVPGIK*AEPDESNAR	UBE2N_HUMAN Ubiquitin-conjugating enzyme E2 N OS=Homo sapiens OX=9606 GN=UBE2N PE=1 SV=1	1.2987
P61088_K92	UBE2N	ICLDILK*DK	UBE2N_HUMAN Ubiquitin-conjugating enzyme E2 N OS=Homo sapiens OX=9606 GN=UBE2N PE=1 SV=1	0.22972	Cross-link	Note=Glycyl lysine isopeptide (Lys-Gly) (interchain with G-Cter in ISG15);Ontology_term=ECO:0000269,ECO:0000269;evidence=ECO:0000269|PubMed:16112642,ECO:0000269|PubMed:16122702;Dbxref=PMID:16112642,PMID:16122702
P61106_K193	RAB14	IYQNIQDGSLDLNAAESGVQHK*PSAPQGGR	RAB14_HUMAN Ras-related protein Rab-14 OS=Homo sapiens OX=9606 GN=RAB14 PE=1 SV=4	1.14943
P61158_K348	ACTR3	LK*LSEELSGGR	ARP3_HUMAN Actin-related protein 3 OS=Homo sapiens OX=9606 GN=ACTR3 PE=1 SV=3	2.53722
P61158_K42	ACTR3	ESAK*VGDQAQR	ARP3_HUMAN Actin-related protein 3 OS=Homo sapiens OX=9606 GN=ACTR3 PE=1 SV=3	9.09091
P61160_K253	ACTR2	IIK*VGGER	ARP2_HUMAN Actin-related protein 2 OS=Homo sapiens OX=9606 GN=ACTR2 PE=1 SV=1	10
P61160_K388	ACTR2	VLEK*LGVTVR	ARP2_HUMAN Actin-related protein 2 OS=Homo sapiens OX=9606 GN=ACTR2 PE=1 SV=1	6.25
P61163_K61	ACTR1A	VMAGALEGDIFIGPK*AEEHR	ACTZ_HUMAN Alpha-centractin OS=Homo sapiens OX=9606 GN=ACTR1A PE=1 SV=1	0.996585
P61201_K415	COPS2	IDQVNQLLELDHQK*R	CSN2_HUMAN COP9 signalosome complex subunit 2 OS=Homo sapiens OX=9606 GN=COPS2 PE=1 SV=1	1.35258
P61221_K431	ABCE1	QLLHEK*IR	ABCE1_HUMAN ATP-binding cassette sub-family E member 1 OS=Homo sapiens OX=9606 GN=ABCE1 PE=1 SV=1	2.63432
P61247_K182	RPS3A	EVQTNDLK*EVVNK	RS3A_HUMAN 40S ribosomal protein S3a OS=Homo sapiens OX=9606 GN=RPS3A PE=1 SV=2	4.59559
P61247_K249	RPS3A	ATGDETGAK*VER	RS3A_HUMAN 40S ribosomal protein S3a OS=Homo sapiens OX=9606 GN=RPS3A PE=1 SV=2	8.33333	Modified residue$Cross-link	Note=N6-acetyllysine%3B alternate;Ontology_term=ECO:0007744;evidence=ECO:0007744|PubMed:19608861;Dbxref=PMID:19608861$Note=Glycyl lysine isopeptide (Lys-Gly) (interchain with G-Cter in SUMO2)%3B alternate;Ontology_term=ECO:0007744,ECO:0007744;evidence=ECO:0007744|PubMed:25755297,ECO:0007744|PubMed:28112733;Dbxref=PMID:25755297,PMID:28112733
P61247_K27	RPS3A	VVDPFSK*K	RS3A_HUMAN 40S ribosomal protein S3a OS=Homo sapiens OX=9606 GN=RPS3A PE=1 SV=2	1.1861
P61247_K46	RPS3A	NIGK*TLVTR	RS3A_HUMAN 40S ribosomal protein S3a OS=Homo sapiens OX=9606 GN=RPS3A PE=1 SV=2	3.70194
P61247_K56	RPS3A	TQGTK*IASDGLK	RS3A_HUMAN 40S ribosomal protein S3a OS=Homo sapiens OX=9606 GN=RPS3A PE=1 SV=2	1.14797	Modified residue	Note=N6-acetyllysine;Ontology_term=ECO:0000250;evidence=ECO:0000250|UniProtKB:P97351
P61247_K63	RPS3A	IASDGLK*GR	RS3A_HUMAN 40S ribosomal protein S3a OS=Homo sapiens OX=9606 GN=RPS3A PE=1 SV=2	1.19969
P61254_K113	RPL26	LKLDK*DR	RL26_HUMAN 60S ribosomal protein L26 OS=Homo sapiens OX=9606 GN=RPL26 PE=1 SV=1	3.33333
P61254_K28	RPL26	K*IMSSPLSK	RL26_HUMAN 60S ribosomal protein L26 OS=Homo sapiens OX=9606 GN=RPL26 PE=1 SV=1	6.90476
P61254_K51	RPL26	K*DDEVQVVR	RL26_HUMAN 60S ribosomal protein L26 OS=Homo sapiens OX=9606 GN=RPL26 PE=1 SV=1	0.68027
P61254_K63	RPL26	GHYK*GQQIGK	RL26_HUMAN 60S ribosomal protein L26 OS=Homo sapiens OX=9606 GN=RPL26 PE=1 SV=1	6.90994
P61313_K153	RPL15	NPDTQWITK*PVHK	RL15_HUMAN 60S ribosomal protein L15 OS=Homo sapiens OX=9606 GN=RPL15 PE=1 SV=2	1.16674
P61313_K157	RPL15	PVHK*HR	RL15_HUMAN 60S ribosomal protein L15 OS=Homo sapiens OX=9606 GN=RPL15 PE=1 SV=2	8.39161
P61313_K83	RPL15	GATYGK*PVHHGVNQLK	RL15_HUMAN 60S ribosomal protein L15 OS=Homo sapiens OX=9606 GN=RPL15 PE=1 SV=2	5.25414	Cross-link	Note=Glycyl lysine isopeptide (Lys-Gly) (interchain with G-Cter in SUMO2);Ontology_term=ECO:0007744;evidence=ECO:0007744|PubMed:28112733;Dbxref=PMID:28112733
P61353_K107	RPL27	DPALK*R	RL27_HUMAN 60S ribosomal protein L27 OS=Homo sapiens OX=9606 GN=RPL27 PE=1 SV=2	1.1236
P61353_K117	RPL27	VK*FEER	RL27_HUMAN 60S ribosomal protein L27 OS=Homo sapiens OX=9606 GN=RPL27 PE=1 SV=2	8.54701
P61353_K93	RPL27	YSVDIPLDK*TVVNK	RL27_HUMAN 60S ribosomal protein L27 OS=Homo sapiens OX=9606 GN=RPL27 PE=1 SV=2	5.37193	Modified residue	Note=N6-acetyllysine;Ontology_term=ECO:0007744;evidence=ECO:0007744|PubMed:19608861;Dbxref=PMID:19608861
P61353_K98	RPL27	TVVNK*DVFR	RL27_HUMAN 60S ribosomal protein L27 OS=Homo sapiens OX=9606 GN=RPL27 PE=1 SV=2	1.81818
P61513_K13	RPL37A	VGIVGK*YGTR	RL37A_HUMAN 60S ribosomal protein L37a OS=Homo sapiens OX=9606 GN=RPL37A PE=1 SV=2	0.57554
P61513_K28	RPL37A	K*IEISQHAK	RL37A_HUMAN 60S ribosomal protein L37a OS=Homo sapiens OX=9606 GN=RPL37A PE=1 SV=2	0.19084
P61604_K56	HSPE1	GK*GGEIQPVSVK	CH10_HUMAN 10 kDa heat shock protein, mitochondrial OS=Homo sapiens OX=9606 GN=HSPE1 PE=1 SV=2	10	Modified residue	Note=N6-acetyllysine%3B alternate;Ontology_term=ECO:0007744;evidence=ECO:0007744|PubMed:19608861;Dbxref=PMID:19608861
P61604_K70	HSPE1	VGDK*VLLPEYGGTK	CH10_HUMAN 10 kDa heat shock protein, mitochondrial OS=Homo sapiens OX=9606 GN=HSPE1 PE=1 SV=2	3.208	Modified residue	Note=N6-acetyllysine%3B alternate;Ontology_term=ECO:0000250;evidence=ECO:0000250|UniProtKB:Q64433
P61604_K8	HSPE1	K*FLPLFDR	CH10_HUMAN 10 kDa heat shock protein, mitochondrial OS=Homo sapiens OX=9606 GN=HSPE1 PE=1 SV=2	10	Modified residue	Note=N6-acetyllysine;Ontology_term=ECO:0000250;evidence=ECO:0000250|UniProtKB:Q64433
P61619_K268	SEC61A1	VDLPIK*SAR	S61A1_HUMAN Protein transport protein Sec61 subunit alpha isoform 1 OS=Homo sapiens OX=9606 GN=SEC61A1 PE=1 SV=2	0.886195
P61769_K111	B2M	VNHVTLSQPK*IVK	B2MG_HUMAN Beta-2-microglobulin OS=Homo sapiens OX=9606 GN=B2M PE=1 SV=1	5.81376
P61769_K114	B2M	IVK*WDR	B2MG_HUMAN Beta-2-microglobulin OS=Homo sapiens OX=9606 GN=B2M PE=1 SV=1	6.45833
P61923_K51	COPZ1	NIFNK*THR	COPZ1_HUMAN Coatomer subunit zeta-1 OS=Homo sapiens OX=9606 GN=COPZ1 PE=1 SV=1	5.40752
P61927_K10	RPL37	GTSSFGK*R	RL37_HUMAN 60S ribosomal protein L37 OS=Homo sapiens OX=9606 GN=RPL37 PE=1 SV=2	0.73529	Modified residue	Note=N6-acetyllysine;Ontology_term=ECO:0007744;evidence=ECO:0007744|PubMed:19608861;Dbxref=PMID:19608861
P61927_K14	RPL37	NK*THTLCR	RL37_HUMAN 60S ribosomal protein L37 OS=Homo sapiens OX=9606 GN=RPL37 PE=1 SV=2	5.21086
P61956_K11	SUMO2	EGVK*TENNDHINLK	SUMO2_HUMAN Small ubiquitin-related modifier 2 OS=Homo sapiens OX=9606 GN=SUMO2 PE=1 SV=3	10	Modified residue$Cross-link	Note=N6-acetyllysine%3B alternate;Ontology_term=ECO:0007744;evidence=ECO:0007744|PubMed:19608861;Dbxref=PMID:19608861$Note=Glycyl lysine isopeptide (Lys-Gly) (interchain with G-Cter in SUMO)%3B alternate
P61978_K34	HNRNPK	RPAEDMEEEQAFK*R	HNRPK_HUMAN Heterogeneous nuclear ribonucleoprotein K OS=Homo sapiens OX=9606 GN=HNRNPK PE=1 SV=1	9.07547	Modified residue$Cross-link	Note=N6-acetyllysine%3B alternate;Ontology_term=ECO:0000250;evidence=ECO:0000250|UniProtKB:P61979$Note=Glycyl lysine isopeptide (Lys-Gly) (interchain with G-Cter in SUMO1)%3B alternate;Ontology_term=ECO:0007744;evidence=ECO:0007744|PubMed:25114211;Dbxref=PMID:25114211
P61978_K405	HNRNPK	DLAGSIIGK*GGQR	HNRPK_HUMAN Heterogeneous nuclear ribonucleoprotein K OS=Homo sapiens OX=9606 GN=HNRNPK PE=1 SV=1	2.48602	Modified residue$Cross-link	Note=N6-acetyllysine%3B alternate;Ontology_term=ECO:0000250;evidence=ECO:0000250|UniProtKB:P61979$Note=Glycyl lysine isopeptide (Lys-Gly) (interchain with G-Cter in SUMO2)%3B alternate;Ontology_term=ECO:0007744,ECO:0007744;evidence=ECO:0007744|PubMed:25218447,ECO:0007744|PubMed:28112733;Dbxref=PMID:25218447,PMID:28112733
P61978_K422	HNRNPK	HESGASIK*IDEPLEGSEDR	HNRPK_HUMAN Heterogeneous nuclear ribonucleoprotein K OS=Homo sapiens OX=9606 GN=HNRNPK PE=1 SV=1	3.83013	Cross-link	Note=Glycyl lysine isopeptide (Lys-Gly) (interchain with G-Cter in SUMO)%3B alternate
P61978_K60	HNRNPK	NAGAVIGK*GGK	HNRPK_HUMAN Heterogeneous nuclear ribonucleoprotein K OS=Homo sapiens OX=9606 GN=HNRNPK PE=1 SV=1	0.306918	Cross-link	Note=Glycyl lysine isopeptide (Lys-Gly) (interchain with G-Cter in SUMO2);Ontology_term=ECO:0007744;evidence=ECO:0007744|PubMed:28112733;Dbxref=PMID:28112733
P61981_K10	YWHAG	EQLVQK*AR	1433G_HUMAN 14-3-3 protein gamma OS=Homo sapiens OX=9606 GN=YWHAG PE=1 SV=2	0.991552
P61981_K142	YWHAG	YLAEVATGEK*R	1433G_HUMAN 14-3-3 protein gamma OS=Homo sapiens OX=9606 GN=YWHAG PE=1 SV=2	1.12029
P61981_K162	YWHAG	AYSEAHEISK*EHMQPTHPIR	1433G_HUMAN 14-3-3 protein gamma OS=Homo sapiens OX=9606 GN=YWHAG PE=1 SV=2	2.47773
P62081_K103	RPS7	ILPK*PTR	RS7_HUMAN 40S ribosomal protein S7 OS=Homo sapiens OX=9606 GN=RPS7 PE=1 SV=1	3.75164
P62081_K147	RPS7	VK*LDGSR	RS7_HUMAN 40S ribosomal protein S7 OS=Homo sapiens OX=9606 GN=RPS7 PE=1 SV=1	0.89286
P62081_K155	RPS7	LIK*VHLDK	RS7_HUMAN 40S ribosomal protein S7 OS=Homo sapiens OX=9606 GN=RPS7 PE=1 SV=1	1.18776
P62081_K169	RPS7	AQQNNVEHK*VETFSGVYK	RS7_HUMAN 40S ribosomal protein S7 OS=Homo sapiens OX=9606 GN=RPS7 PE=1 SV=1	2.7218
P62081_K49	RPS7	ELNITAAK*EIEVGGGR	RS7_HUMAN 40S ribosomal protein S7 OS=Homo sapiens OX=9606 GN=RPS7 PE=1 SV=1	5.55556
P62191_K98	PSMC1	SK*VDDLR	PRS4_HUMAN 26S proteasome regulatory subunit 4 OS=Homo sapiens OX=9606 GN=PSMC1 PE=1 SV=1	2.03299
P62195_K55	PSMC5	NELNAK*VR	PRS8_HUMAN 26S proteasome regulatory subunit 8 OS=Homo sapiens OX=9606 GN=PSMC5 PE=1 SV=1	1.86484
P62241_K10	RPS8	DNWHK*R	RS8_HUMAN 40S ribosomal protein S8 OS=Homo sapiens OX=9606 GN=RPS8 PE=1 SV=2	6.39355
P62241_K26	RPS8	K*YELGR	RS8_HUMAN 40S ribosomal protein S8 OS=Homo sapiens OX=9606 GN=RPS8 PE=1 SV=2	2.00617
P62241_K37	RPS8	PAANTK*IGPR	RS8_HUMAN 40S ribosomal protein S8 OS=Homo sapiens OX=9606 GN=RPS8 PE=1 SV=2	5.83192	Modified residue	Note=N6-acetyllysine;Ontology_term=ECO:0000250;evidence=ECO:0000250|UniProtKB:P62242
P62244_K19	RPS15A	SINNAEK*R	RS15A_HUMAN 40S ribosomal protein S15a OS=Homo sapiens OX=9606 GN=RPS15A PE=1 SV=2	3.49979
P62244_K84	RPS15A	FDVQLK*DLEK	RS15A_HUMAN 40S ribosomal protein S15a OS=Homo sapiens OX=9606 GN=RPS15A PE=1 SV=2	2.93988
P62249_K131	RPS16	K*FGGPGAR	RS16_HUMAN 40S ribosomal protein S16 OS=Homo sapiens OX=9606 GN=RPS16 PE=1 SV=2	0.98039
P62249_K60	RPS16	LLEPVLLLGK*ER	RS16_HUMAN 40S ribosomal protein S16 OS=Homo sapiens OX=9606 GN=RPS16 PE=1 SV=2	4.91288	Modified residue	Note=N6-acetyllysine;Ontology_term=ECO:0007744;evidence=ECO:0007744|PubMed:19608861;Dbxref=PMID:19608861
P62258_K12	YWHAE	EDLVYQAK*LAEQAER	1433E_HUMAN 14-3-3 protein epsilon OS=Homo sapiens OX=9606 GN=YWHAE PE=1 SV=1	7.42521
P62258_K123	YWHAE	VFYYK*MK	1433E_HUMAN 14-3-3 protein epsilon OS=Homo sapiens OX=9606 GN=YWHAE PE=1 SV=1	10	Modified residue	Note=N6-acetyllysine;Ontology_term=ECO:0007744;evidence=ECO:0007744|PubMed:19608861;Dbxref=PMID:19608861
P62258_K125	YWHAE	MK*GDYHR	1433E_HUMAN 14-3-3 protein epsilon OS=Homo sapiens OX=9606 GN=YWHAE PE=1 SV=1	6.59632
P62258_K142	YWHAE	K*EAAENSLVAYK	1433E_HUMAN 14-3-3 protein epsilon OS=Homo sapiens OX=9606 GN=YWHAE PE=1 SV=1	0.883316
P62258_K69	YWHAE	IISSIEQK*EENK	1433E_HUMAN 14-3-3 protein epsilon OS=Homo sapiens OX=9606 GN=YWHAE PE=1 SV=1	0.882523	Modified residue	Note=N6-acetyllysine;Ontology_term=ECO:0007744;evidence=ECO:0007744|PubMed:19608861;Dbxref=PMID:19608861
P62258_K78	YWHAE	EENKGGEDK*LK	1433E_HUMAN 14-3-3 protein epsilon OS=Homo sapiens OX=9606 GN=YWHAE PE=1 SV=1	1.16972
P62263_K106	RPS14	TK*TPGPGAQSALR	RS14_HUMAN 40S ribosomal protein S14 OS=Homo sapiens OX=9606 GN=RPS14 PE=1 SV=3	1.07296	Cross-link	Note=Glycyl lysine isopeptide (Lys-Gly) (interchain with G-Cter in SUMO2);Ontology_term=ECO:0007744;evidence=ECO:0007744|PubMed:28112733;Dbxref=PMID:28112733
P62263_K125	RPS14	SGMK*IGR	RS14_HUMAN 40S ribosomal protein S14 OS=Homo sapiens OX=9606 GN=RPS14 PE=1 SV=3	4.5905
P62266_K108	RPS23	K*GHAVGDIPGVR	RS23_HUMAN 40S ribosomal protein S23 OS=Homo sapiens OX=9606 GN=RPS23 PE=1 SV=3	4.21246
P62269_K137	RPS18	GQHTK*TTGR	RS18_HUMAN 40S ribosomal protein S18 OS=Homo sapiens OX=9606 GN=RPS18 PE=1 SV=3	4.95529
P62269_K150	RPS18	TVGVSK*K	RS18_HUMAN 40S ribosomal protein S18 OS=Homo sapiens OX=9606 GN=RPS18 PE=1 SV=3	5.55556
P62273_K13	RPS29	K*FGQGSR	RS29_HUMAN 40S ribosomal protein S29 OS=Homo sapiens OX=9606 GN=RPS29 PE=1 SV=2	6.78763
P62277_K34	RPS13	LTSDDVK*EQIYK	RS13_HUMAN 40S ribosomal protein S13 OS=Homo sapiens OX=9606 GN=RPS13 PE=1 SV=2	0.71942	Modified residue	Note=N6-succinyllysine;Ontology_term=ECO:0000250;evidence=ECO:0000250|UniProtKB:P62301
P62277_K39	RPS13	EQIYK*LAK	RS13_HUMAN 40S ribosomal protein S13 OS=Homo sapiens OX=9606 GN=RPS13 PE=1 SV=2	1.13636
P62277_K78	RPS13	SK*GLAPDLPEDLYHLIK	RS13_HUMAN 40S ribosomal protein S13 OS=Homo sapiens OX=9606 GN=RPS13 PE=1 SV=2	1.0814
P62277_K9	RPS13	MHAPGK*GLSQSALPYR	RS13_HUMAN 40S ribosomal protein S13 OS=Homo sapiens OX=9606 GN=RPS13 PE=1 SV=2	8.05804
P62280_K144	RPS11	FNVLK*VTK	RS11_HUMAN 40S ribosomal protein S11 OS=Homo sapiens OX=9606 GN=RPS11 PE=1 SV=3	0.516005
P62280_K30	RPS11	VLLGETGK*EK	RS11_HUMAN 40S ribosomal protein S11 OS=Homo sapiens OX=9606 GN=RPS11 PE=1 SV=3	1.01425
P62280_K45	RPS11	NIGLGFK*TPK	RS11_HUMAN 40S ribosomal protein S11 OS=Homo sapiens OX=9606 GN=RPS11 PE=1 SV=3	1.51411	Modified residue	Note=N6-acetyllysine;Ontology_term=ECO:0007744;evidence=ECO:0007744|PubMed:19608861;Dbxref=PMID:19608861
P62280_K58	RPS11	EAIEGTYIDK*K	RS11_HUMAN 40S ribosomal protein S11 OS=Homo sapiens OX=9606 GN=RPS11 PE=1 SV=3	5.76302	Modified residue	Note=N6-acetyllysine;Ontology_term=ECO:0000250;evidence=ECO:0000250|UniProtKB:P62281
P62333_K298	PSMC6	K*IHIDLPNEQAR	PRS10_HUMAN 26S proteasome regulatory subunit 10B OS=Homo sapiens OX=9606 GN=PSMC6 PE=1 SV=1	1.25
P62424_K11	RPL7A	K*VAPAPAVVK	RL7A_HUMAN 60S ribosomal protein L7a OS=Homo sapiens OX=9606 GN=RPL7A PE=1 SV=2	0.69444	Cross-link	Note=Glycyl lysine isopeptide (Lys-Gly) (interchain with G-Cter in SUMO2);Ontology_term=ECO:0007744;evidence=ECO:0007744|PubMed:28112733;Dbxref=PMID:28112733
P62424_K125	RPL7A	AAGK*GDVPTK	RL7A_HUMAN 60S ribosomal protein L7a OS=Homo sapiens OX=9606 GN=RPL7A PE=1 SV=2	2.07903	Cross-link	Note=Glycyl lysine isopeptide (Lys-Gly) (interchain with G-Cter in SUMO2);Ontology_term=ECO:0007744;evidence=ECO:0007744|PubMed:28112733;Dbxref=PMID:28112733
P62424_K131	RPL7A	GDVPTK*RPPVLR	RL7A_HUMAN 60S ribosomal protein L7a OS=Homo sapiens OX=9606 GN=RPL7A PE=1 SV=2	10
P62424_K150	RPL7A	AGVNTVTTLVENK*K	RL7A_HUMAN 60S ribosomal protein L7a OS=Homo sapiens OX=9606 GN=RPL7A PE=1 SV=2	3.30726
P62424_K20	RPL7A	VAPAPAVVK*K	RL7A_HUMAN 60S ribosomal protein L7a OS=Homo sapiens OX=9606 GN=RPL7A PE=1 SV=2	0.53191	Cross-link	Note=Glycyl lysine isopeptide (Lys-Gly) (interchain with G-Cter in SUMO2);Ontology_term=ECO:0007744;evidence=ECO:0007744|PubMed:28112733;Dbxref=PMID:28112733
P62424_K34	RPL7A	VVNPLFEK*R	RL7A_HUMAN 60S ribosomal protein L7a OS=Homo sapiens OX=9606 GN=RPL7A PE=1 SV=2	4.48141	Modified residue	Note=N6-acetyllysine;Ontology_term=ECO:0007744;evidence=ECO:0007744|PubMed:19608861;Dbxref=PMID:19608861
P62424_K48	RPL7A	NFGIGQDIQPK*R	RL7A_HUMAN 60S ribosomal protein L7a OS=Homo sapiens OX=9606 GN=RPL7A PE=1 SV=2	1.30929	Cross-link	Note=Glycyl lysine isopeptide (Lys-Gly) (interchain with G-Cter in SUMO2);Ontology_term=ECO:0007744;evidence=ECO:0007744|PubMed:28112733;Dbxref=PMID:28112733
P62424_K56	RPL7A	FVK*WPR	RL7A_HUMAN 60S ribosomal protein L7a OS=Homo sapiens OX=9606 GN=RPL7A PE=1 SV=2	2.5641
P62424_K97	RPL7A	QTATQLLK*LAHK	RL7A_HUMAN 60S ribosomal protein L7a OS=Homo sapiens OX=9606 GN=RPL7A PE=1 SV=2	1.07143	Modified residue$Cross-link	Note=N6-acetyllysine%3B alternate;Ontology_term=ECO:0007744;evidence=ECO:0007744|PubMed:19608861;Dbxref=PMID:19608861$Note=Glycyl lysine isopeptide (Lys-Gly) (interchain with G-Cter in SUMO2)%3B alternate;Ontology_term=ECO:0007744;evidence=ECO:0007744|PubMed:28112733;Dbxref=PMID:28112733
P62491_K179	RAB11A	IVSQK*QMSDR	RB11A_HUMAN Ras-related protein Rab-11A OS=Homo sapiens OX=9606 GN=RAB11A PE=1 SV=3	9.16667
P62495_K342	ETF1	YVLHCQGTEEEK*ILYLTPEQEK	ERF1_HUMAN Eukaryotic peptide chain release factor subunit 1 OS=Homo sapiens OX=9606 GN=ETF1 PE=1 SV=3	7.69231
P62701_K106	RPS4X	LIYDTK*GR	RS4X_HUMAN 40S ribosomal protein S4, X isoform OS=Homo sapiens OX=9606 GN=RPS4X PE=1 SV=2	5.51944
P62701_K120	RPS4X	ITPEEAK*YK	RS4X_HUMAN 40S ribosomal protein S4, X isoform OS=Homo sapiens OX=9606 GN=RPS4X PE=1 SV=2	1.88679
P62701_K128	RPS4X	K*IFVGTK	RS4X_HUMAN 40S ribosomal protein S4, X isoform OS=Homo sapiens OX=9606 GN=RPS4X PE=1 SV=2	1.19048
P62701_K211	RPS4X	HPGSFDVVHVK*DANGNSFATR	RS4X_HUMAN 40S ribosomal protein S4, X isoform OS=Homo sapiens OX=9606 GN=RPS4X PE=1 SV=2	5.15521
P62701_K37	RPS4X	PSTGPHK*LR	RS4X_HUMAN 40S ribosomal protein S4, X isoform OS=Homo sapiens OX=9606 GN=RPS4X PE=1 SV=2	0.899476
P62701_K75	RPS4X	IDGK*VR	RS4X_HUMAN 40S ribosomal protein S4, X isoform OS=Homo sapiens OX=9606 GN=RPS4X PE=1 SV=2	1.44928
P62750_K115	RPL23A	K*LYDIDVAK	RL23A_HUMAN 60S ribosomal protein L23a OS=Homo sapiens OX=9606 GN=RPL23A PE=1 SV=1	0.566852
P62753_K188	RPS6	VLQHK*R	RS6_HUMAN 40S ribosomal protein S6 OS=Homo sapiens OX=9606 GN=RPS6 PE=1 SV=1	4.71282
P62753_K203	RPS6	NK*EEAAEYAK	RS6_HUMAN 40S ribosomal protein S6 OS=Homo sapiens OX=9606 GN=RPS6 PE=1 SV=1	0.74627
P62753_K230	RPS6	QEQIAK*R	RS6_HUMAN 40S ribosomal protein S6 OS=Homo sapiens OX=9606 GN=RPS6 PE=1 SV=1	6.13786
P62753_K243	RPS6	ASTSK*SESSQK	RS6_HUMAN 40S ribosomal protein S6 OS=Homo sapiens OX=9606 GN=RPS6 PE=1 SV=1	1.42681
P62753_K30	RPS6	TFYEK*R	RS6_HUMAN 40S ribosomal protein S6 OS=Homo sapiens OX=9606 GN=RPS6 PE=1 SV=1	2.07894
P62805_K13	H4C1	GLGK*GGAK	H4_HUMAN Histone H4 OS=Homo sapiens OX=9606 GN=H4C1 PE=1 SV=2	1.64331	Modified residue$Cross-link	Note=N6-(2-hydroxyisobutyryl)lysine%3B alternate;Ontology_term=ECO:0000269;evidence=ECO:0000269|PubMed:24681537;Dbxref=PMID:24681537$Note=Glycyl lysine isopeptide (Lys-Gly) (interchain with G-Cter in SUMO2)%3B alternate;Ontology_term=ECO:0007744;evidence=ECO:0007744|PubMed:25218447;Dbxref=PMID:25218447
P62805_K32	H4C1	DNIQGITK*PAIR	H4_HUMAN Histone H4 OS=Homo sapiens OX=9606 GN=H4C1 PE=1 SV=2	3.31411	Modified residue$Cross-link	Note=N6-(2-hydroxyisobutyryl)lysine%3B alternate;Ontology_term=ECO:0000269;evidence=ECO:0000269|PubMed:24681537;Dbxref=PMID:24681537$Note=Glycyl lysine isopeptide (Lys-Gly) (interchain with G-Cter in SUMO2)%3B alternate;Ontology_term=ECO:0007744;evidence=ECO:0007744|PubMed:28112733;Dbxref=PMID:28112733
P62805_K78	H4C1	DAVTYTEHAK*R	H4_HUMAN Histone H4 OS=Homo sapiens OX=9606 GN=H4C1 PE=1 SV=2	2.91942	Modified residue	Note=N6-(2-hydroxyisobutyryl)lysine%3B alternate;Ontology_term=ECO:0000269;evidence=ECO:0000269|PubMed:24681537;Dbxref=PMID:24681537
P62805_K92	H4C1	TVTAMDVVYALK*R	H4_HUMAN Histone H4 OS=Homo sapiens OX=9606 GN=H4C1 PE=1 SV=2	3.34588	Modified residue$Cross-link	Note=N6-(2-hydroxyisobutyryl)lysine%3B alternate;Ontology_term=ECO:0000269;evidence=ECO:0000269|PubMed:24681537;Dbxref=PMID:24681537$Note=Glycyl lysine isopeptide (Lys-Gly) (interchain with G-Cter in SUMO2)%3B alternate;Ontology_term=ECO:0007744;evidence=ECO:0007744|PubMed:28112733;Dbxref=PMID:28112733
P62826_K28	RAN	TTFVK*R	RAN_HUMAN GTP-binding nuclear protein Ran OS=Homo sapiens OX=9606 GN=RAN PE=1 SV=3	6.60461
P62826_K37	RAN	HLTGEFEK*K	RAN_HUMAN GTP-binding nuclear protein Ran OS=Homo sapiens OX=9606 GN=RAN PE=1 SV=3	0.76923	Modified residue	Note=N6-acetyllysine;Ontology_term=ECO:0000269;evidence=ECO:0000269|PubMed:31075303;Dbxref=PMID:31075303
P62826_K60	RAN	GPIK*FNVWDTAGQEK	RAN_HUMAN GTP-binding nuclear protein Ran OS=Homo sapiens OX=9606 GN=RAN PE=1 SV=3	6.37626	Modified residue	Note=N6-acetyllysine;Ontology_term=ECO:0007744;evidence=ECO:0007744|PubMed:19608861;Dbxref=PMID:19608861
P62829_K113	RPL23	GEMK*GSAITGPVAK	RL23_HUMAN 60S ribosomal protein L23 OS=Homo sapiens OX=9606 GN=RPL23 PE=1 SV=1	1.793
P62829_K13	RPL23	GGSSGAK*FR	RL23_HUMAN 60S ribosomal protein L23 OS=Homo sapiens OX=9606 GN=RPL23 PE=1 SV=1	0.948203
P62829_K75	RPL23	K*VHPAVVIR	RL23_HUMAN 60S ribosomal protein L23 OS=Homo sapiens OX=9606 GN=RPL23 PE=1 SV=1	0.614234
P62837_K8	UBE2D2	IHK*ELNDLAR	UB2D2_HUMAN Ubiquitin-conjugating enzyme E2 D2 OS=Homo sapiens OX=9606 GN=UBE2D2 PE=1 SV=1	5.56397
P62841_K52	RPS15	K*QHSLLK	RS15_HUMAN 40S ribosomal protein S15 OS=Homo sapiens OX=9606 GN=RPS15 PE=1 SV=2	8.46727
P62847_K11	RPS24	K*FMTNR	RS24_HUMAN 40S ribosomal protein S24 OS=Homo sapiens OX=9606 GN=RPS24 PE=1 SV=1	1.0989
P62847_K99	RPS24	HGLYEK*K	RS24_HUMAN 40S ribosomal protein S24 OS=Homo sapiens OX=9606 GN=RPS24 PE=1 SV=1	4.72042
P62851_K66	RPS25	EVPNYK*LITPAVVSER	RS25_HUMAN 40S ribosomal protein S25 OS=Homo sapiens OX=9606 GN=RPS25 PE=1 SV=1	1.12646	Modified residue	Note=N6-acetyllysine;Ontology_term=ECO:0007744;evidence=ECO:0007744|PubMed:19608861;Dbxref=PMID:19608861
P62851_K94	RPS25	AALQELLSK*GLIK	RS25_HUMAN 40S ribosomal protein S25 OS=Homo sapiens OX=9606 GN=RPS25 PE=1 SV=1	1.1838	Modified residue	Note=N6-acetyllysine%3B alternate;Ontology_term=ECO:0007744;evidence=ECO:0007744|PubMed:19608861;Dbxref=PMID:19608861
P62857_K10	RPS28	VQPIK*LAR	RS28_HUMAN 40S ribosomal protein S28 OS=Homo sapiens OX=9606 GN=RPS28 PE=1 SV=1	4.43819
P62857_K16	RPS28	VTK*VLGR	RS28_HUMAN 40S ribosomal protein S28 OS=Homo sapiens OX=9606 GN=RPS28 PE=1 SV=1	4.06313
P62857_K47	RPS28	NVK*GPVR	RS28_HUMAN 40S ribosomal protein S28 OS=Homo sapiens OX=9606 GN=RPS28 PE=1 SV=1	1.72884
P62861_K1	FAU	K*VHGSLAR	RS30_HUMAN 40S ribosomal protein S30 OS=Homo sapiens OX=9606 GN=FAU PE=1 SV=1	2.41201
P62861_K18	FAU	GQTPK*VAK	RS30_HUMAN 40S ribosomal protein S30 OS=Homo sapiens OX=9606 GN=FAU PE=1 SV=1	10
P62861_K51	FAU	FVNVVPTFGK*K	RS30_HUMAN 40S ribosomal protein S30 OS=Homo sapiens OX=9606 GN=FAU PE=1 SV=1	2.54708	Modified residue	Note=N6-succinyllysine;Ontology_term=ECO:0000250;evidence=ECO:0000250|UniProtKB:P62862
P62873_K15	GNB1	QEAEQLK*NQIR	GBB1_HUMAN Guanine nucleotide-binding protein G(I)/G(S)/G(T) subunit beta-1 OS=Homo sapiens OX=9606 GN=GNB1 PE=1 SV=3	1.93202
P62877_K105	RBX1	EWEFQK*YGH	RBX1_HUMAN E3 ubiquitin-protein ligase RBX1 OS=Homo sapiens OX=9606 GN=RBX1 PE=1 SV=1	10
P62888_K9	RPL30	K*SLESINSR	RL30_HUMAN 60S ribosomal protein L30 OS=Homo sapiens OX=9606 GN=RPL30 PE=1 SV=2	2.93192
P62899_K31	RPL31	EYTINIHK*R	RL31_HUMAN 60S ribosomal protein L31 OS=Homo sapiens OX=9606 GN=RPL31 PE=1 SV=1	10
P62899_K70	RPL31	LNK*AVWAK	RL31_HUMAN 60S ribosomal protein L31 OS=Homo sapiens OX=9606 GN=RPL31 PE=1 SV=1	5	Modified residue	Note=N6-succinyllysine;Ontology_term=ECO:0000250;evidence=ECO:0000250|UniProtKB:P62900
P62899_K75	RPL31	AVWAK*GIR	RL31_HUMAN 60S ribosomal protein L31 OS=Homo sapiens OX=9606 GN=RPL31 PE=1 SV=1	0.71942	Modified residue	Note=N6-acetyllysine%3B alternate;Ontology_term=ECO:0007744;evidence=ECO:0007744|PubMed:19608861;Dbxref=PMID:19608861
P62906_K130	RPL10A	ILGPGLNK*AGK	RL10A_HUMAN 60S ribosomal protein L10a OS=Homo sapiens OX=9606 GN=RPL10A PE=1 SV=2	1.08259
P62906_K91	RPL10A	AVDIPHMDIEALK*K	RL10A_HUMAN 60S ribosomal protein L10a OS=Homo sapiens OX=9606 GN=RPL10A PE=1 SV=2	1.16466	Modified residue	Note=N6-acetyllysine;Ontology_term=ECO:0000250;evidence=ECO:0000250|UniProtKB:P53026
P62913_K144	RPL11	PGFSIADK*K	RL11_HUMAN 60S ribosomal protein L11 OS=Homo sapiens OX=9606 GN=RPL11 PE=1 SV=2	0.72464
P62913_K154	RPL11	TGCIGAK*HR	RL11_HUMAN 60S ribosomal protein L11 OS=Homo sapiens OX=9606 GN=RPL11 PE=1 SV=2	1.77432	Cross-link	Note=Glycyl lysine isopeptide (Lys-Gly) (interchain with G-Cter in SUMO2);Ontology_term=ECO:0007744;evidence=ECO:0007744|PubMed:28112733;Dbxref=PMID:28112733
P62913_K159	RPL11	ISK*EEAMR	RL11_HUMAN 60S ribosomal protein L11 OS=Homo sapiens OX=9606 GN=RPL11 PE=1 SV=2	2.63616
P62913_K78	RPL11	GAK*AEEILEK	RL11_HUMAN 60S ribosomal protein L11 OS=Homo sapiens OX=9606 GN=RPL11 PE=1 SV=2	0.5618
P62913_K85	RPL11	AEEILEK*GLK	RL11_HUMAN 60S ribosomal protein L11 OS=Homo sapiens OX=9606 GN=RPL11 PE=1 SV=2	0.712682	Modified residue	Note=N6-acetyllysine;Ontology_term=ECO:0007744;evidence=ECO:0007744|PubMed:19608861;Dbxref=PMID:19608861
P62917_K10	RPL8	K*GAGSVFR	RL8_HUMAN 60S ribosomal protein L8 OS=Homo sapiens OX=9606 GN=RPL8 PE=1 SV=2	2.00567
P62917_K144	RPL8	ASGNYATVISHNPETK*K	RL8_HUMAN 60S ribosomal protein L8 OS=Homo sapiens OX=9606 GN=RPL8 PE=1 SV=2	7.68976
P62917_K149	RPL8	VK*LPSGSK	RL8_HUMAN 60S ribosomal protein L8 OS=Homo sapiens OX=9606 GN=RPL8 PE=1 SV=2	0.308908	Cross-link	Note=Glycyl lysine isopeptide (Lys-Gly) (interchain with G-Cter in SUMO2);Ontology_term=ECO:0007744;evidence=ECO:0007744|PubMed:28112733;Dbxref=PMID:28112733
P62917_K181	RPL8	IDKPILK*AGR	RL8_HUMAN 60S ribosomal protein L8 OS=Homo sapiens OX=9606 GN=RPL8 PE=1 SV=2	0.442438
P62917_K21	RPL8	AHVK*HR	RL8_HUMAN 60S ribosomal protein L8 OS=Homo sapiens OX=9606 GN=RPL8 PE=1 SV=2	2.09791
P62917_K234	RPL8	K*VGLIAAR	RL8_HUMAN 60S ribosomal protein L8 OS=Homo sapiens OX=9606 GN=RPL8 PE=1 SV=2	3.81643	Cross-link	Note=Glycyl lysine isopeptide (Lys-Gly) (interchain with G-Cter in SUMO2);Ontology_term=ECO:0007744;evidence=ECO:0007744|PubMed:28112733;Dbxref=PMID:28112733
P62917_K250	RPL8	GTK*TVQEK	RL8_HUMAN 60S ribosomal protein L8 OS=Homo sapiens OX=9606 GN=RPL8 PE=1 SV=2	1.81818	Cross-link	Note=Glycyl lysine isopeptide (Lys-Gly) (interchain with G-Cter in SUMO2);Ontology_term=ECO:0007744;evidence=ECO:0007744|PubMed:28112733;Dbxref=PMID:28112733
P62917_K60	RPL8	GAPLAK*VVFR	RL8_HUMAN 60S ribosomal protein L8 OS=Homo sapiens OX=9606 GN=RPL8 PE=1 SV=2	4.79695
P62937_K125	PPIA	TEWLDGK*HVVFGK	PPIA_HUMAN Peptidyl-prolyl cis-trans isomerase A OS=Homo sapiens OX=9606 GN=PPIA PE=1 SV=2	4.25107	Modified residue	Note=N6-acetyllysine;Ontology_term=ECO:0000269,ECO:0000269,ECO:0007744;evidence=ECO:0000269|PubMed:20364129,ECO:0000269|PubMed:25678563,ECO:0007744|PubMed:19608861;Dbxref=PMID:20364129,PMID:25678563,PMID:19608861
P62937_K131	PPIA	HVVFGK*VK	PPIA_HUMAN Peptidyl-prolyl cis-trans isomerase A OS=Homo sapiens OX=9606 GN=PPIA PE=1 SV=2	1.37853	Modified residue	Note=N6-acetyllysine;Ontology_term=ECO:0007744;evidence=ECO:0007744|PubMed:19608861;Dbxref=PMID:19608861
P62937_K28	PPIA	VSFELFADK*VPK	PPIA_HUMAN Peptidyl-prolyl cis-trans isomerase A OS=Homo sapiens OX=9606 GN=PPIA PE=1 SV=2	5.34194	Modified residue$Cross-link	Note=N6-acetyllysine%3B alternate;Ontology_term=ECO:0007744;evidence=ECO:0007744|PubMed:19608861;Dbxref=PMID:19608861$Note=Glycyl lysine isopeptide (Lys-Gly) (interchain with G-Cter in SUMO2)%3B alternate;Ontology_term=ECO:0007744;evidence=ECO:0007744|PubMed:28112733;Dbxref=PMID:28112733
P62937_K31	PPIA	VSFELFADKVPK*TAENFR	PPIA_HUMAN Peptidyl-prolyl cis-trans isomerase A OS=Homo sapiens OX=9606 GN=PPIA PE=1 SV=2	5.58152
P62937_K44	PPIA	ALSTGEK*GFGYK	PPIA_HUMAN Peptidyl-prolyl cis-trans isomerase A OS=Homo sapiens OX=9606 GN=PPIA PE=1 SV=2	3.22633	Modified residue	Note=N6-acetyllysine;Ontology_term=ECO:0007744;evidence=ECO:0007744|PubMed:19608861;Dbxref=PMID:19608861
P62937_K76	PPIA	HNGTGGK*SIYGEK	PPIA_HUMAN Peptidyl-prolyl cis-trans isomerase A OS=Homo sapiens OX=9606 GN=PPIA PE=1 SV=2	2.28815	Modified residue	Note=N6-acetyllysine;Ontology_term=ECO:0007744;evidence=ECO:0007744|PubMed:19608861;Dbxref=PMID:19608861
P62937_K82	PPIA	SIYGEK*FEDENFILK	PPIA_HUMAN Peptidyl-prolyl cis-trans isomerase A OS=Homo sapiens OX=9606 GN=PPIA PE=1 SV=2	1.56512	Modified residue$Cross-link	Note=N6-acetyllysine%3B alternate;Ontology_term=ECO:0007744;evidence=ECO:0007744|PubMed:19608861;Dbxref=PMID:19608861$Note=Glycyl lysine isopeptide (Lys-Gly) (interchain with G-Cter in SUMO2)%3B alternate;Ontology_term=ECO:0007744;evidence=ECO:0007744|PubMed:28112733;Dbxref=PMID:28112733
P62942_K36	FKBP1A	K*FDSSR	FKB1A_HUMAN Peptidyl-prolyl cis-trans isomerase FKBP1A OS=Homo sapiens OX=9606 GN=FKBP1A PE=1 SV=2	4.84914
P62942_K53	FKBP1A	FMLGK*QEVIR	FKB1A_HUMAN Peptidyl-prolyl cis-trans isomerase FKBP1A OS=Homo sapiens OX=9606 GN=FKBP1A PE=1 SV=2	4.41138	Modified residue	Note=N6-acetyllysine%3B alternate;Ontology_term=ECO:0000250;evidence=ECO:0000250|UniProtKB:P26883
P62987_K11	UBA52	TLTGK*TITLEVEPSDTIENVK	RL40_HUMAN Ubiquitin-60S ribosomal protein L40 OS=Homo sapiens OX=9606 GN=UBA52 PE=1 SV=2	1.47059	Cross-link	Note=Glycyl lysine isopeptide (Lys-Gly) (interchain with G-Cter in ubiquitin);Ontology_term=ECO:0000269,ECO:0000269;evidence=ECO:0000269|PubMed:16443603,ECO:0000269|PubMed:16543144;Dbxref=PMID:16443603,PMID:16543144
P62987_K33	UBA52	IQDK*EGIPPDQQR	RL40_HUMAN Ubiquitin-60S ribosomal protein L40 OS=Homo sapiens OX=9606 GN=UBA52 PE=1 SV=2	10
P62987_K48	UBA52	LIFAGK*QLEDGR	RL40_HUMAN Ubiquitin-60S ribosomal protein L40 OS=Homo sapiens OX=9606 GN=UBA52 PE=1 SV=2	7.69231	Cross-link	Note=Glycyl lysine isopeptide (Lys-Gly) (interchain with G-Cter in ubiquitin);Ontology_term=ECO:0000269,ECO:0000269;evidence=ECO:0000269|PubMed:16443603,ECO:0000269|PubMed:16543144;Dbxref=PMID:16443603,PMID:16543144
P62987_K63	UBA52	TLSDYNIQK*ESTLHLVLR	RL40_HUMAN Ubiquitin-60S ribosomal protein L40 OS=Homo sapiens OX=9606 GN=UBA52 PE=1 SV=2	10	Cross-link	Note=Glycyl lysine isopeptide (Lys-Gly) (interchain with G-Cter in ubiquitin);Ontology_term=ECO:0000269,ECO:0000269;evidence=ECO:0000269|PubMed:16543144,ECO:0000269|PubMed:18719106;Dbxref=PMID:16543144,PMID:18719106
P62987_K88	UBA52	QLAQK*YNCDK	RL40_HUMAN Ubiquitin-60S ribosomal protein L40 OS=Homo sapiens OX=9606 GN=UBA52 PE=1 SV=2	0.20367
P63000_K166	RAC1	GLK*TVFDEAIR	RAC1_HUMAN Ras-related C3 botulinum toxin substrate 1 OS=Homo sapiens OX=9606 GN=RAC1 PE=1 SV=1	1.81878
P63104_K138	YWHAZ	YLAEVAAGDDK*K	1433Z_HUMAN 14-3-3 protein zeta/delta OS=Homo sapiens OX=9606 GN=YWHAZ PE=1 SV=1	2.01723
P63104_K157	YWHAZ	GIVDQSQQAYQEAFEISK*K	1433Z_HUMAN 14-3-3 protein zeta/delta OS=Homo sapiens OX=9606 GN=YWHAZ PE=1 SV=1	1.71905
P63104_K68	YWHAZ	VVSSIEQK*TEGAEK	1433Z_HUMAN 14-3-3 protein zeta/delta OS=Homo sapiens OX=9606 GN=YWHAZ PE=1 SV=1	1.64053	Modified residue	Note=N6-acetyllysine;Ontology_term=ECO:0007744;evidence=ECO:0007744|PubMed:19608861;Dbxref=PMID:19608861
P63104_K75	YWHAZ	K*QQMAR	1433Z_HUMAN 14-3-3 protein zeta/delta OS=Homo sapiens OX=9606 GN=YWHAZ PE=1 SV=1	1.05851
P63104_K9	YWHAZ	NELVQK*AK	1433Z_HUMAN 14-3-3 protein zeta/delta OS=Homo sapiens OX=9606 GN=YWHAZ PE=1 SV=1	0.332473
P63167_K36	DYNLL1	YNIEK*DIAAHIK	DYL1_HUMAN Dynein light chain 1, cytoplasmic OS=Homo sapiens OX=9606 GN=DYNLL1 PE=1 SV=1	0.789525	Modified residue	Note=N6-acetyllysine;Ontology_term=ECO:0007744;evidence=ECO:0007744|PubMed:19608861;Dbxref=PMID:19608861
P63167_K43	DYNLL1	DIAAHIK*K	DYL1_HUMAN Dynein light chain 1, cytoplasmic OS=Homo sapiens OX=9606 GN=DYNLL1 PE=1 SV=1	0.23529	Cross-link	Note=Glycyl lysine isopeptide (Lys-Gly) (interchain with G-Cter in SUMO2);Ontology_term=ECO:0007744;evidence=ECO:0007744|PubMed:28112733;Dbxref=PMID:28112733
P63173_K67	RPL38	QSLPPGLAVK*ELK	RL38_HUMAN 60S ribosomal protein L38 OS=Homo sapiens OX=9606 GN=RPL38 PE=1 SV=2	0.40161	Modified residue	Note=N6-acetyllysine;Ontology_term=ECO:0007744;evidence=ECO:0007744|PubMed:19608861;Dbxref=PMID:19608861
P63173_K9	RPL38	KIEEIK*DFLLTAR	RL38_HUMAN 60S ribosomal protein L38 OS=Homo sapiens OX=9606 GN=RPL38 PE=1 SV=2	0.67568	Modified residue$Cross-link	Note=N6-acetyllysine%3B alternate;Ontology_term=ECO:0007744;evidence=ECO:0007744|PubMed:19608861;Dbxref=PMID:19608861$Note=Glycyl lysine isopeptide (Lys-Gly) (interchain with G-Cter in SUMO2)%3B alternate;Ontology_term=ECO:0007744;evidence=ECO:0007744|PubMed:28112733;Dbxref=PMID:28112733
P63220_K74	RPS21	LAK*ADGIVSK	RS21_HUMAN 40S ribosomal protein S21 OS=Homo sapiens OX=9606 GN=RPS21 PE=1 SV=1	3.18652
P63241_K121	EIF5A	LPEGDLGK*EIEQK	IF5A1_HUMAN Eukaryotic translation initiation factor 5A-1 OS=Homo sapiens OX=9606 GN=EIF5A PE=1 SV=2	1.33357	Modified residue	Note=N6-acetyllysine;Ontology_term=ECO:0000250;evidence=ECO:0000250|UniProtKB:P63242
P63261_K18	ACTG1	EEEIAALVIDNGSGMCK*AGFAGDDAPR	ACTG_HUMAN Actin, cytoplasmic 2 OS=Homo sapiens OX=9606 GN=ACTG1 PE=1 SV=1	2
P63279_K18	UBE2I	K*DHPFGFVAVPTK	UBC9_HUMAN SUMO-conjugating enzyme UBC9 OS=Homo sapiens OX=9606 GN=UBE2I PE=1 SV=1	0.80645	Cross-link	Note=Glycyl lysine isopeptide (Lys-Gly) (interchain with G-Cter in SUMO2)%3B alternate;Ontology_term=ECO:0007744;evidence=ECO:0007744|PubMed:28112733;Dbxref=PMID:28112733
P63313_K39	TMSB10	ETIEQEK*R	TYB10_HUMAN Thymosin beta-10 OS=Homo sapiens OX=9606 GN=TMSB10 PE=1 SV=2	5	Modified residue	Note=N6-acetyllysine;Ontology_term=ECO:0007744;evidence=ECO:0007744|PubMed:19608861;Dbxref=PMID:19608861
P67812_K100	SEC11A	VLK*IHEK	SC11A_HUMAN Signal peptidase complex catalytic subunit SEC11A OS=Homo sapiens OX=9606 GN=SEC11A PE=1 SV=1	1.36986
P67812_K136	SEC11A	K*DVVGR	SC11A_HUMAN Signal peptidase complex catalytic subunit SEC11A OS=Homo sapiens OX=9606 GN=SEC11A PE=1 SV=1	0.92314
P67936_K13	TPM4	K*IQALQQQADEAEDR	TPM4_HUMAN Tropomyosin alpha-4 chain OS=Homo sapiens OX=9606 GN=TPM4 PE=1 SV=3	2.97188
P67936_K169	TPM4	NVTNNLK*SLEAASEK	TPM4_HUMAN Tropomyosin alpha-4 chain OS=Homo sapiens OX=9606 GN=TPM4 PE=1 SV=3	1.22153
P67936_K181	TPM4	YSEK*EDKYEEEIK	TPM4_HUMAN Tropomyosin alpha-4 chain OS=Homo sapiens OX=9606 GN=TPM4 PE=1 SV=3	1.20687
P67936_K212	TPM4	TVAK*LEK	TPM4_HUMAN Tropomyosin alpha-4 chain OS=Homo sapiens OX=9606 GN=TPM4 PE=1 SV=3	4.54699
P67936_K223	TPM4	TIDDLEEK*LAQAK	TPM4_HUMAN Tropomyosin alpha-4 chain OS=Homo sapiens OX=9606 GN=TPM4 PE=1 SV=3	3.95333
P68032_K293	ACTC1	K*DLYANNVLSGGTTMYPGIADR	ACTC_HUMAN Actin, alpha cardiac muscle 1 OS=Homo sapiens OX=9606 GN=ACTC1 PE=1 SV=1	1.2987
P68032_K70	ACTC1	GILTLK*YPIEHGIITNWDDMEK	ACTC_HUMAN Actin, alpha cardiac muscle 1 OS=Homo sapiens OX=9606 GN=ACTC1 PE=1 SV=1	4.29293
P68032_K86	ACTC1	YPIEHGIITNWDDMEK*IWHHTFYNELR	ACTC_HUMAN Actin, alpha cardiac muscle 1 OS=Homo sapiens OX=9606 GN=ACTC1 PE=1 SV=1	3.75706	Modified residue	Note=N6-methyllysine;Ontology_term=ECO:0000269;evidence=ECO:0000269|PubMed:23673617;Dbxref=PMID:23673617
P68036_K131	UBE2L3	ADLAEEYSK*DR	UB2L3_HUMAN Ubiquitin-conjugating enzyme E2 L3 OS=Homo sapiens OX=9606 GN=UBE2L3 PE=1 SV=1	10	Modified residue	Note=N6-acetyllysine;Ontology_term=ECO:0007744;evidence=ECO:0007744|PubMed:19608861;Dbxref=PMID:19608861
P68366_K112	TUBA4A	GHYTIGK*EIIDPVLDR	TBA4A_HUMAN Tubulin alpha-4A chain OS=Homo sapiens OX=9606 GN=TUBA4A PE=1 SV=1	4.12137
P68366_K60	TUBA4A	TIGGGDDSFTTFFCETGAGK*HVPR	TBA4A_HUMAN Tubulin alpha-4A chain OS=Homo sapiens OX=9606 GN=TUBA4A PE=1 SV=1	0.65789
P68371_K58	TUBB4B	INVYYNEATGGK*YVPR	TBB4B_HUMAN Tubulin beta-4B chain OS=Homo sapiens OX=9606 GN=TUBB4B PE=1 SV=1	1.2492	Modified residue	Note=N6-acetyllysine;Ontology_term=ECO:0007744;evidence=ECO:0007744|PubMed:19608861;Dbxref=PMID:19608861
P78371_K154	CCT2	EALLSSAVDHGSDEVK*FR	TCPB_HUMAN T-complex protein 1 subunit beta OS=Homo sapiens OX=9606 GN=CCT2 PE=1 SV=4	5.70213	Modified residue	Note=N6-acetyllysine;Ontology_term=ECO:0007744;evidence=ECO:0007744|PubMed:19608861;Dbxref=PMID:19608861
P78371_K248	CCT2	ILIANTGMDTDK*IK	TCPB_HUMAN T-complex protein 1 subunit beta OS=Homo sapiens OX=9606 GN=CCT2 PE=1 SV=4	0.75188	Cross-link	Note=Glycyl lysine isopeptide (Lys-Gly) (interchain with G-Cter in SUMO2);Ontology_term=ECO:0007744;evidence=ECO:0007744|PubMed:28112733;Dbxref=PMID:28112733
P78371_K272	CCT2	VAEIEHAEK*EK	TCPB_HUMAN T-complex protein 1 subunit beta OS=Homo sapiens OX=9606 GN=CCT2 PE=1 SV=4	0.64516
P78371_K402	CCT2	SLHDALCVLAQTVK*DSR	TCPB_HUMAN T-complex protein 1 subunit beta OS=Homo sapiens OX=9606 GN=CCT2 PE=1 SV=4	1.40845
P78371_K522	CCT2	VDNIIK*AAPR	TCPB_HUMAN T-complex protein 1 subunit beta OS=Homo sapiens OX=9606 GN=CCT2 PE=1 SV=4	1.52366
P78417_K143	GSTO1	SQNKEDYAGLK*EEFR	GSTO1_HUMAN Glutathione S-transferase omega-1 OS=Homo sapiens OX=9606 GN=GSTO1 PE=1 SV=2	0.59273	Modified residue	Note=N6-acetyllysine;Ontology_term=ECO:0007744;evidence=ECO:0007744|PubMed:19608861;Dbxref=PMID:19608861
P78417_K160	GSTO1	LEEVLTNK*K	GSTO1_HUMAN Glutathione S-transferase omega-1 OS=Homo sapiens OX=9606 GN=GSTO1 PE=1 SV=2	0.345417
P78527_K1141	PRKDC	K*HVSLNK	PRKDC_HUMAN DNA-dependent protein kinase catalytic subunit OS=Homo sapiens OX=9606 GN=PRKDC PE=1 SV=3	1
P78527_K2746	PRKDC	K*GVAEQK	PRKDC_HUMAN DNA-dependent protein kinase catalytic subunit OS=Homo sapiens OX=9606 GN=PRKDC PE=1 SV=3	0.35577
P78527_K2829	PRKDC	TLSEK*NNITQK	PRKDC_HUMAN DNA-dependent protein kinase catalytic subunit OS=Homo sapiens OX=9606 GN=PRKDC PE=1 SV=3	0.74268
P78527_K2908	PRKDC	LLPAELPAK*R	PRKDC_HUMAN DNA-dependent protein kinase catalytic subunit OS=Homo sapiens OX=9606 GN=PRKDC PE=1 SV=3	0.746484
P78527_K3355	PRKDC	IIANALSSEPACLAEIEEDK*AR	PRKDC_HUMAN DNA-dependent protein kinase catalytic subunit OS=Homo sapiens OX=9606 GN=PRKDC PE=1 SV=3	1.0101
P78527_K3753	PRKDC	EHPFLVK*GGEDLR	PRKDC_HUMAN DNA-dependent protein kinase catalytic subunit OS=Homo sapiens OX=9606 GN=PRKDC PE=1 SV=3	1.17715
P80303_K171	NUCB2	AATSDLEHYDK*TR	NUCB2_HUMAN Nucleobindin-2 OS=Homo sapiens OX=9606 GN=NUCB2 PE=1 SV=3	10	DNA binding	Ontology_term=ECO:0000250;evidence=ECO:0000250
P80303_K69	NUCB2	QVIDVLETDK*HFR	NUCB2_HUMAN Nucleobindin-2 OS=Homo sapiens OX=9606 GN=NUCB2 PE=1 SV=3	7.14286
P82921_K40	MRPS21	ILTMDGLIEDIK*HR	RT21_HUMAN 28S ribosomal protein S21, mitochondrial OS=Homo sapiens OX=9606 GN=MRPS21 PE=1 SV=3	0.76923
P83731_K135	RPL24	APTK*AAPK	RL24_HUMAN 60S ribosomal protein L24 OS=Homo sapiens OX=9606 GN=RPL24 PE=1 SV=1	0.71942
P83731_K147	RPL24	IVKPVK*VSAPR	RL24_HUMAN 60S ribosomal protein L24 OS=Homo sapiens OX=9606 GN=RPL24 PE=1 SV=1	0.5988	Cross-link	Note=Glycyl lysine isopeptide (Lys-Gly) (interchain with G-Cter in SUMO2);Ontology_term=ECO:0007744;evidence=ECO:0007744|PubMed:28112733;Dbxref=PMID:28112733
P83731_K61	RPL24	K*GQSEEIQK	RL24_HUMAN 60S ribosomal protein L24 OS=Homo sapiens OX=9606 GN=RPL24 PE=1 SV=1	0.79468
P83731_K69	RPL24	GQSEEIQK*K	RL24_HUMAN 60S ribosomal protein L24 OS=Homo sapiens OX=9606 GN=RPL24 PE=1 SV=1	0.76073
P83731_K77	RPL24	AVK*FQR	RL24_HUMAN 60S ribosomal protein L24 OS=Homo sapiens OX=9606 GN=RPL24 PE=1 SV=1	2.53278	Modified residue	Note=N6-acetyllysine;Ontology_term=ECO:0007744;evidence=ECO:0007744|PubMed:19608861;Dbxref=PMID:19608861
P83731_K93	RPL24	AITGASLADIMAK*R	RL24_HUMAN 60S ribosomal protein L24 OS=Homo sapiens OX=9606 GN=RPL24 PE=1 SV=1	3.29114	Modified residue	Note=N6-acetyllysine;Ontology_term=ECO:0007744;evidence=ECO:0007744|PubMed:19608861;Dbxref=PMID:19608861
P83731_K97	RPL24	NQK*PEVR	RL24_HUMAN 60S ribosomal protein L24 OS=Homo sapiens OX=9606 GN=RPL24 PE=1 SV=1	4.67303
P83881_K27	RPL36A	VTQYK*K	RL36A_HUMAN 60S ribosomal protein L36a OS=Homo sapiens OX=9606 GN=RPL36A PE=1 SV=2	1.72414
P83881_K86	RPL36A	MLAIK*R	RL36A_HUMAN 60S ribosomal protein L36a OS=Homo sapiens OX=9606 GN=RPL36A PE=1 SV=2	0.418633
P83881_K97	RPL36A	HFELGGDK*K	RL36A_HUMAN 60S ribosomal protein L36a OS=Homo sapiens OX=9606 GN=RPL36A PE=1 SV=2	0.67568
P84074_K174	HPCA	GAK*SDPSIVR	HPCA_HUMAN Neuron-specific calcium-binding protein hippocalcin OS=Homo sapiens OX=9606 GN=HPCA PE=1 SV=2	1.44928
P84077_K142	ARF1	QDLPNAMNAAEITDK*LGLHSLR	ARF1_HUMAN ADP-ribosylation factor 1 OS=Homo sapiens OX=9606 GN=ARF1 PE=1 SV=2	2.75135
P84090_K41	ERH	MYEEHLK*R	ERH_HUMAN Enhancer of rudimentary homolog OS=Homo sapiens OX=9606 GN=ERH PE=1 SV=1	3.58371
P84095_K183	RHOG	AVLNPTPIK*R	RHOG_HUMAN Rho-related GTP-binding protein RhoG OS=Homo sapiens OX=9606 GN=RHOG PE=1 SV=1	3.64722
P84098_K46	RPL19	LIK*DGLIIR	RL19_HUMAN 60S ribosomal protein L19 OS=Homo sapiens OX=9606 GN=RPL19 PE=1 SV=1	0.889946
P84098_K53	RPL19	K*PVTVHSR	RL19_HUMAN 60S ribosomal protein L19 OS=Homo sapiens OX=9606 GN=RPL19 PE=1 SV=1	0.80466
P84098_K82	RPL19	K*GTANAR	RL19_HUMAN 60S ribosomal protein L19 OS=Homo sapiens OX=9606 GN=RPL19 PE=1 SV=1	1.6993
P84103_K85	SRSF3	VELSNGEK*R	SRSF3_HUMAN Serine/arginine-rich splicing factor 3 OS=Homo sapiens OX=9606 GN=SRSF3 PE=1 SV=1	2.2075
P84243_K123	H3-3A	VTIMPK*DIQLAR	H33_HUMAN Histone H3.3 OS=Homo sapiens OX=9606 GN=H3-3A PE=1 SV=2	5.00988	Modified residue	Note=N6-(2-hydroxyisobutyryl)lysine%3B alternate;Ontology_term=ECO:0000269;evidence=ECO:0000269|PubMed:24681537;Dbxref=PMID:24681537
P84243_K80	H3-3A	EIAQDFK*TDLR	H33_HUMAN Histone H3.3 OS=Homo sapiens OX=9606 GN=H3-3A PE=1 SV=2	5.73055	Modified residue	Note=N6%2CN6%2CN6-trimethyllysine%3B alternate;Ontology_term=ECO:0000250;evidence=ECO:0000250|UniProtKB:P84244
P98179_K84	RBM3	VDHAGK*SAR	RBM3_HUMAN RNA-binding protein 3 OS=Homo sapiens OX=9606 GN=RBM3 PE=1 SV=1	6.66667
Q00059_K205	TFAM	ELYIQHAK*EDETR	TFAM_HUMAN Transcription factor A, mitochondrial OS=Homo sapiens OX=9606 GN=TFAM PE=1 SV=1	5	DNA binding	Note=HMG box 2;Ontology_term=ECO:0000255;evidence=ECO:0000255|PROSITE-ProRule:PRU00267
Q00325_K206	SLC25A3	DAAPK*MYK	MPCP_HUMAN Phosphate carrier protein, mitochondrial OS=Homo sapiens OX=9606 GN=SLC25A3 PE=1 SV=2	1.40845
Q00325_K209	SLC25A3	MYK*EEGLK	MPCP_HUMAN Phosphate carrier protein, mitochondrial OS=Homo sapiens OX=9606 GN=SLC25A3 PE=1 SV=2	0.398703	Modified residue	Note=N6-acetyllysine;Ontology_term=ECO:0000250;evidence=ECO:0000250|UniProtKB:Q8VEM8
Q00325_K252	SLC25A3	FVVPK*PR	MPCP_HUMAN Phosphate carrier protein, mitochondrial OS=Homo sapiens OX=9606 GN=SLC25A3 PE=1 SV=2	0.280015
Q00325_K295	SLC25A3	EK*GSSASLVLK	MPCP_HUMAN Phosphate carrier protein, mitochondrial OS=Homo sapiens OX=9606 GN=SLC25A3 PE=1 SV=2	0.982327
Q00325_K309	SLC25A3	LGFK*GVWK	MPCP_HUMAN Phosphate carrier protein, mitochondrial OS=Homo sapiens OX=9606 GN=SLC25A3 PE=1 SV=2	0.69444
Q00325_K355	SLC25A3	LPRPPPPEMPESLK*K	MPCP_HUMAN Phosphate carrier protein, mitochondrial OS=Homo sapiens OX=9606 GN=SLC25A3 PE=1 SV=2	0.82645
Q00325_K99	SLC25A3	MQVDPQK*YK	MPCP_HUMAN Phosphate carrier protein, mitochondrial OS=Homo sapiens OX=9606 GN=SLC25A3 PE=1 SV=2	0.417267	Modified residue	Note=N6-acetyllysine;Ontology_term=ECO:0007744;evidence=ECO:0007744|PubMed:19608861;Dbxref=PMID:19608861
Q00341_K494	HDLBP	IEGDPQGVQQAK*R	VIGLN_HUMAN Vigilin OS=Homo sapiens OX=9606 GN=HDLBP PE=1 SV=2	6.91919
Q00610_K1347	CLTC	VNIPK*VLR	CLH1_HUMAN Clathrin heavy chain 1 OS=Homo sapiens OX=9606 GN=CLTC PE=1 SV=5	5.14037
Q00610_K1392	CLTC	EGQFK*DIITK	CLH1_HUMAN Clathrin heavy chain 1 OS=Homo sapiens OX=9606 GN=CLTC PE=1 SV=5	0.7874
Q00610_K1441	CLTC	AVNYFSK*VK	CLH1_HUMAN Clathrin heavy chain 1 OS=Homo sapiens OX=9606 GN=CLTC PE=1 SV=5	0.70922	Modified residue	Note=N6-acetyllysine%3B alternate;Ontology_term=ECO:0007744;evidence=ECO:0007744|PubMed:19608861;Dbxref=PMID:19608861
Q00610_K1501	CLTC	LEK*HELIEFR	CLH1_HUMAN Clathrin heavy chain 1 OS=Homo sapiens OX=9606 GN=CLTC PE=1 SV=5	5.69784	Modified residue	Note=N6-acetyllysine;Ontology_term=ECO:0007744;evidence=ECO:0007744|PubMed:19608861;Dbxref=PMID:19608861
Q00610_K1612	CLTC	VDK*LDASESLR	CLH1_HUMAN Clathrin heavy chain 1 OS=Homo sapiens OX=9606 GN=CLTC PE=1 SV=5	1.77404
Q00610_K367	CLTC	K*FNALFAQGNYSEAAK	CLH1_HUMAN Clathrin heavy chain 1 OS=Homo sapiens OX=9606 GN=CLTC PE=1 SV=5	2.02751
Q00610_K619	CLTC	AHIAQLCEK*AGLLQR	CLH1_HUMAN Clathrin heavy chain 1 OS=Homo sapiens OX=9606 GN=CLTC PE=1 SV=5	6.19107
Q00610_K637	CLTC	ALEHFTDLYDIK*R	CLH1_HUMAN Clathrin heavy chain 1 OS=Homo sapiens OX=9606 GN=CLTC PE=1 SV=5	2.09683
Q00610_K742	CLTC	TGQIK*EVER	CLH1_HUMAN Clathrin heavy chain 1 OS=Homo sapiens OX=9606 GN=CLTC PE=1 SV=5	0.34602
Q00610_K764	CLTC	NFLK*EAK	CLH1_HUMAN Clathrin heavy chain 1 OS=Homo sapiens OX=9606 GN=CLTC PE=1 SV=5	1.17647
Q00610_K881	CLTC	IHEGCEEPATHNALAK*IYIDSNNNPER	CLH1_HUMAN Clathrin heavy chain 1 OS=Homo sapiens OX=9606 GN=CLTC PE=1 SV=5	2.55344
Q00765_K29	REEP5	LEAK*TGVNR	REEP5_HUMAN Receptor expression-enhancing protein 5 OS=Homo sapiens OX=9606 GN=REEP5 PE=1 SV=3	1.1274
Q00839_K181	HNRNPU	GAAK*EAAGK	HNRPU_HUMAN Heterogeneous nuclear ribonucleoprotein U OS=Homo sapiens OX=9606 GN=HNRNPU PE=1 SV=6	1.24221
Q00839_K31	HNRNPU	GLK*AELMER	HNRPU_HUMAN Heterogeneous nuclear ribonucleoprotein U OS=Homo sapiens OX=9606 GN=HNRNPU PE=1 SV=6	5.94152
Q00839_K343	HNRNPU	VTEK*IPVR	HNRPU_HUMAN Heterogeneous nuclear ribonucleoprotein U OS=Homo sapiens OX=9606 GN=HNRNPU PE=1 SV=6	1.5625
Q00839_K352	HNRNPU	HLYTK*DIDIHEVR	HNRPU_HUMAN Heterogeneous nuclear ribonucleoprotein U OS=Homo sapiens OX=9606 GN=HNRNPU PE=1 SV=6	2.00202	Modified residue	Note=N6-acetyllysine;Ontology_term=ECO:0007744;evidence=ECO:0007744|PubMed:19608861;Dbxref=PMID:19608861
Q00839_K436	HNRNPU	ISK*EVLAGR	HNRPU_HUMAN Heterogeneous nuclear ribonucleoprotein U OS=Homo sapiens OX=9606 GN=HNRNPU PE=1 SV=6	0.4744
Q00839_K489	HNRNPU	GPK*GPEEK	HNRPU_HUMAN Heterogeneous nuclear ribonucleoprotein U OS=Homo sapiens OX=9606 GN=HNRNPU PE=1 SV=6	0.3876
Q00839_K494	HNRNPU	GPEEK*K	HNRPU_HUMAN Heterogeneous nuclear ribonucleoprotein U OS=Homo sapiens OX=9606 GN=HNRNPU PE=1 SV=6	0.43478
Q00839_K516	HNRNPU	TTWVTK*HAAENPGK	HNRPU_HUMAN Heterogeneous nuclear ribonucleoprotein U OS=Homo sapiens OX=9606 GN=HNRNPU PE=1 SV=6	0.844545	Modified residue$Cross-link	Note=N6-acetyllysine%3B alternate;Ontology_term=ECO:0007744;evidence=ECO:0007744|PubMed:19608861;Dbxref=PMID:19608861$Note=Glycyl lysine isopeptide (Lys-Gly) (interchain with G-Cter in SUMO2)%3B alternate;Ontology_term=ECO:0007744;evidence=ECO:0007744|PubMed:28112733;Dbxref=PMID:28112733
Q00839_K544	HNRNPU	K*QMADTGK	HNRPU_HUMAN Heterogeneous nuclear ribonucleoprotein U OS=Homo sapiens OX=9606 GN=HNRNPU PE=1 SV=6	0.33785
Q00839_K602	HNRNPU	K*AVVVCPK	HNRPU_HUMAN Heterogeneous nuclear ribonucleoprotein U OS=Homo sapiens OX=9606 GN=HNRNPU PE=1 SV=6	0.27463
Q00839_K609	HNRNPU	AVVVCPK*DEDYK	HNRPU_HUMAN Heterogeneous nuclear ribonucleoprotein U OS=Homo sapiens OX=9606 GN=HNRNPU PE=1 SV=6	1.11996	Cross-link	Note=Glycyl lysine isopeptide (Lys-Gly) (interchain with G-Cter in SUMO2);Ontology_term=ECO:0007744,ECO:0007744;evidence=ECO:0007744|PubMed:25218447,ECO:0007744|PubMed:28112733;Dbxref=PMID:25218447,PMID:28112733
Q00839_K670	HNRNPU	LLEQYK*EESKK	HNRPU_HUMAN Heterogeneous nuclear ribonucleoprotein U OS=Homo sapiens OX=9606 GN=HNRNPU PE=1 SV=6	0.393567	Cross-link	Note=Glycyl lysine isopeptide (Lys-Gly) (interchain with G-Cter in SUMO2);Ontology_term=ECO:0007744,ECO:0007744;evidence=ECO:0007744|PubMed:25218447,ECO:0007744|PubMed:28112733;Dbxref=PMID:25218447,PMID:28112733
Q01082_K1156	SPTBN1	LQALDTGWNELHK*MWENR	SPTB2_HUMAN Spectrin beta chain, non-erythrocytic 1 OS=Homo sapiens OX=9606 GN=SPTBN1 PE=1 SV=2	1.13636
Q01082_K1459	SPTBN1	STDEVDSK*R	SPTB2_HUMAN Spectrin beta chain, non-erythrocytic 1 OS=Homo sapiens OX=9606 GN=SPTBN1 PE=1 SV=2	0.65789
Q01082_K1815	SPTBN1	FYHDAK*EIFGR	SPTB2_HUMAN Spectrin beta chain, non-erythrocytic 1 OS=Homo sapiens OX=9606 GN=SPTBN1 PE=1 SV=2	7.46867	Modified residue	Note=N6-acetyllysine;Ontology_term=ECO:0007744;evidence=ECO:0007744|PubMed:19608861;Dbxref=PMID:19608861
Q01082_K1824	SPTBN1	IQDK*HK	SPTB2_HUMAN Spectrin beta chain, non-erythrocytic 1 OS=Homo sapiens OX=9606 GN=SPTBN1 PE=1 SV=2	1.33713
Q01082_K1878	SPTBN1	LQAAYAGDK*ADDIQK	SPTB2_HUMAN Spectrin beta chain, non-erythrocytic 1 OS=Homo sapiens OX=9606 GN=SPTBN1 PE=1 SV=2	1.47003
Q01082_K1913	SPTBN1	LVDTGDK*FR	SPTB2_HUMAN Spectrin beta chain, non-erythrocytic 1 OS=Homo sapiens OX=9606 GN=SPTBN1 PE=1 SV=2	1.00924	Modified residue	Note=N6-acetyllysine;Ontology_term=ECO:0007744;evidence=ECO:0007744|PubMed:19608861;Dbxref=PMID:19608861
Q01082_K1957	SPTBN1	DVSSVELLMNNHQGIK*AEIDAR	SPTB2_HUMAN Spectrin beta chain, non-erythrocytic 1 OS=Homo sapiens OX=9606 GN=SPTBN1 PE=1 SV=2	1.02041
Q01082_K355	SPTBN1	TVEKPPK*FTEK	SPTB2_HUMAN Spectrin beta chain, non-erythrocytic 1 OS=Homo sapiens OX=9606 GN=SPTBN1 PE=1 SV=2	1.59709
Q01082_K419	SPTBN1	QEK*LEQLAR	SPTB2_HUMAN Spectrin beta chain, non-erythrocytic 1 OS=Homo sapiens OX=9606 GN=SPTBN1 PE=1 SV=2	6.25
Q01082_K462	SPTBN1	LVSQDNFGFDLPAVEAATK*K	SPTB2_HUMAN Spectrin beta chain, non-erythrocytic 1 OS=Homo sapiens OX=9606 GN=SPTBN1 PE=1 SV=2	0.76336
Q01082_K497	SPTBN1	ELEAENYHDIK*R	SPTB2_HUMAN Spectrin beta chain, non-erythrocytic 1 OS=Homo sapiens OX=9606 GN=SPTBN1 PE=1 SV=2	10
Q01082_K679	SPTBN1	LLSK*HR	SPTB2_HUMAN Spectrin beta chain, non-erythrocytic 1 OS=Homo sapiens OX=9606 GN=SPTBN1 PE=1 SV=2	10
Q01082_K714	SPTBN1	EGEDMIAEEHFGSEK*IR	SPTB2_HUMAN Spectrin beta chain, non-erythrocytic 1 OS=Homo sapiens OX=9606 GN=SPTBN1 PE=1 SV=2	3.80878
Q01105_K132	SET	VEVTEFEDIK*SGYR	SET_HUMAN Protein SET OS=Homo sapiens OX=9606 GN=SET PE=1 SV=3	1.65301
Q01105_K167	SET	EFHLNESGDPSSK*STEIK	SET_HUMAN Protein SET OS=Homo sapiens OX=9606 GN=SET PE=1 SV=3	4.88445
Q01105_K172	SET	STEIK*WK	SET_HUMAN Protein SET OS=Homo sapiens OX=9606 GN=SET PE=1 SV=3	5.02622	Modified residue	Note=N6-acetyllysine;Ontology_term=ECO:0007744;evidence=ECO:0007744|PubMed:19608861;Dbxref=PMID:19608861
Q01105_K177	SET	SGK*DLTK	SET_HUMAN Protein SET OS=Homo sapiens OX=9606 GN=SET PE=1 SV=3	1.91979
Q01105_K72	SET	VEQK*YNK	SET_HUMAN Protein SET OS=Homo sapiens OX=9606 GN=SET PE=1 SV=3	1.22222
Q01105_K83	SET	QPFFQK*R	SET_HUMAN Protein SET OS=Homo sapiens OX=9606 GN=SET PE=1 SV=3	1.5873
Q01130_K36	SRSF2	VFEK*YGR	SRSF2_HUMAN Serine/arginine-rich splicing factor 2 OS=Homo sapiens OX=9606 GN=SRSF2 PE=1 SV=4	4.30215
Q01518_K282	CAP1	THK*NPALK	CAP1_HUMAN Adenylyl cyclase-associated protein 1 OS=Homo sapiens OX=9606 GN=CAP1 PE=1 SV=5	2.81096
Q01518_K287	CAP1	NPALK*AQSGPVR	CAP1_HUMAN Adenylyl cyclase-associated protein 1 OS=Homo sapiens OX=9606 GN=CAP1 PE=1 SV=5	1.77435	Modified residue	Note=N6-methyllysine;Ontology_term=ECO:0007744;evidence=ECO:0007744|PubMed:24129315;Dbxref=PMID:24129315
Q01518_K63	CAP1	ISK*EIGGDVQK	CAP1_HUMAN Adenylyl cyclase-associated protein 1 OS=Homo sapiens OX=9606 GN=CAP1 PE=1 SV=5	0.852227
Q01518_K81	CAP1	HAEMVHTGLK*LER	CAP1_HUMAN Adenylyl cyclase-associated protein 1 OS=Homo sapiens OX=9606 GN=CAP1 PE=1 SV=5	0.937648	Modified residue	Note=N6-acetyllysine;Ontology_term=ECO:0007744;evidence=ECO:0007744|PubMed:19608861;Dbxref=PMID:19608861
Q01650_K19	SLC7A5	ALAAPAAEEK*EEAR	LAT1_HUMAN Large neutral amino acids transporter small subunit 1 OS=Homo sapiens OX=9606 GN=SLC7A5 PE=1 SV=2	6.25	Cross-link	Note=Glycyl lysine isopeptide (Lys-Gly) (interchain with G-Cter in ubiquitin)
Q01813_K10	PFKP	APK*GSLR	PFKAP_HUMAN ATP-dependent 6-phosphofructokinase, platelet type OS=Homo sapiens OX=9606 GN=PFKP PE=1 SV=2	0.997735
Q01813_K109	PFKP	LK*AACNLLQR	PFKAP_HUMAN ATP-dependent 6-phosphofructokinase, platelet type OS=Homo sapiens OX=9606 GN=PFKP PE=1 SV=2	0.777677
Q01813_K15	PFKP	K*FLEHLSGAGK	PFKAP_HUMAN ATP-dependent 6-phosphofructokinase, platelet type OS=Homo sapiens OX=9606 GN=PFKP PE=1 SV=2	0.531635
Q01813_K156	PFKP	NGQIDK*EAVQK	PFKAP_HUMAN ATP-dependent 6-phosphofructokinase, platelet type OS=Homo sapiens OX=9606 GN=PFKP PE=1 SV=2	1.03093
Q01813_K395	PFKP	SFAGNLNTYK*R	PFKAP_HUMAN ATP-dependent 6-phosphofructokinase, platelet type OS=Homo sapiens OX=9606 GN=PFKP PE=1 SV=2	1.0451	Modified residue	Note=N6-acetyllysine;Ontology_term=ECO:0007744;evidence=ECO:0007744|PubMed:19608861;Dbxref=PMID:19608861
Q01813_K400	PFKP	LAIK*LPDDQIPK	PFKAP_HUMAN ATP-dependent 6-phosphofructokinase, platelet type OS=Homo sapiens OX=9606 GN=PFKP PE=1 SV=2	0.864857
Q01813_K625	PFKP	DLQSNVEHLTEK*MK	PFKAP_HUMAN ATP-dependent 6-phosphofructokinase, platelet type OS=Homo sapiens OX=9606 GN=PFKP PE=1 SV=2	0.504385
Q01813_K688	PFKP	NFGTK*ISAR	PFKAP_HUMAN ATP-dependent 6-phosphofructokinase, platelet type OS=Homo sapiens OX=9606 GN=PFKP PE=1 SV=2	0.667438	Modified residue	Note=N6-acetyllysine;Ontology_term=ECO:0007744;evidence=ECO:0007744|PubMed:19608861;Dbxref=PMID:19608861
Q02543_K11	RPL18A	EYK*VVGR	RL18A_HUMAN 60S ribosomal protein L18a OS=Homo sapiens OX=9606 GN=RPL18A PE=1 SV=2	0.490273	Cross-link	Note=Glycyl lysine isopeptide (Lys-Gly) (interchain with G-Cter in SUMO2);Ontology_term=ECO:0007744;evidence=ECO:0007744|PubMed:25218447;Dbxref=PMID:25218447
Q02543_K128	RPL18A	AHSIQIMK*VEEIAASK	RL18A_HUMAN 60S ribosomal protein L18a OS=Homo sapiens OX=9606 GN=RPL18A PE=1 SV=2	2.78512	Cross-link	Note=Glycyl lysine isopeptide (Lys-Gly) (interchain with G-Cter in SUMO2);Ontology_term=ECO:0007744;evidence=ECO:0007744|PubMed:28112733;Dbxref=PMID:28112733
Q02750_K59	MAP2K1	K*VGEIK	MP2K1_HUMAN Dual specificity mitogen-activated protein kinase kinase 1 OS=Homo sapiens OX=9606 GN=MAP2K1 PE=1 SV=2	0.75758
Q02790_K76	FKBP4	DK*FSFDLGK	FKBP4_HUMAN Peptidyl-prolyl cis-trans isomerase FKBP4 OS=Homo sapiens OX=9606 GN=FKBP4 PE=1 SV=3	5.55556
Q02818_K177	NUCB1	DLAQYDAAHHEEFK*R	NUCB1_HUMAN Nucleobindin-1 OS=Homo sapiens OX=9606 GN=NUCB1 PE=1 SV=4	9.64286	DNA binding	Ontology_term=ECO:0000255;evidence=ECO:0000255
Q02878_K207	RPL6	IDISNVK*IPK	RL6_HUMAN 60S ribosomal protein L6 OS=Homo sapiens OX=9606 GN=RPL6 PE=1 SV=3	10	Modified residue	Note=N6-succinyllysine;Ontology_term=ECO:0000250;evidence=ECO:0000250|UniProtKB:P47911
Q02878_K210	RPL6	IPK*HLTDAYFK	RL6_HUMAN 60S ribosomal protein L6 OS=Homo sapiens OX=9606 GN=RPL6 PE=1 SV=3	5.57918
Q02878_K237	RPL6	HQEGEIFDTEK*EK	RL6_HUMAN 60S ribosomal protein L6 OS=Homo sapiens OX=9606 GN=RPL6 PE=1 SV=3	1.09022
Q02878_K72	RPL6	K*YSAAK	RL6_HUMAN 60S ribosomal protein L6 OS=Homo sapiens OX=9606 GN=RPL6 PE=1 SV=3	0.41667
Q03001_K3729	DST	ALIEQK*LNEAK	DYST_HUMAN Dystonin OS=Homo sapiens OX=9606 GN=DST PE=1 SV=4	0.9901
Q03135_K26	CAV1	EQGNIYK*PNNK	CAV1_HUMAN Caveolin-1 OS=Homo sapiens OX=9606 GN=CAV1 PE=1 SV=4	3.00972	Cross-link	Note=Glycyl lysine isopeptide (Lys-Gly) (interchain with G-Cter in ubiquitin);Ontology_term=ECO:0000269;evidence=ECO:0000269|PubMed:23335559;Dbxref=PMID:23335559
Q03135_K47	CAV1	QVYDAHTK*EIDLVNR	CAV1_HUMAN Caveolin-1 OS=Homo sapiens OX=9606 GN=CAV1 PE=1 SV=4	3.26923	Cross-link	Note=Glycyl lysine isopeptide (Lys-Gly) (interchain with G-Cter in ubiquitin);Ontology_term=ECO:0000269;evidence=ECO:0000269|PubMed:23335559;Dbxref=PMID:23335559
Q03252_K150	LMNB2	VK*DLESLFHR	LMNB2_HUMAN Lamin-B2 OS=Homo sapiens OX=9606 GN=LMNB2 PE=1 SV=4	10
Q03252_K195	LMNB2	AEDGHAVAK*K	LMNB2_HUMAN Lamin-B2 OS=Homo sapiens OX=9606 GN=LMNB2 PE=1 SV=4	1.57576	Cross-link	Note=Glycyl lysine isopeptide (Lys-Gly) (interchain with G-Cter in SUMO2);Ontology_term=ECO:0007744,ECO:0007744;evidence=ECO:0007744|PubMed:25755297,ECO:0007744|PubMed:28112733;Dbxref=PMID:25755297,PMID:28112733
Q03252_K308	LMNB2	EELK*EAR	LMNB2_HUMAN Lamin-B2 OS=Homo sapiens OX=9606 GN=LMNB2 PE=1 SV=4	1.25
Q03519_K612	TAP2	GSQLAAGQK*QR	TAP2_HUMAN Antigen peptide transporter 2 OS=Homo sapiens OX=9606 GN=TAP2 PE=1 SV=1	1.17647
Q04206_K195	RELA	APNTAELK*ICR	TF65_HUMAN Transcription factor p65 OS=Homo sapiens OX=9606 GN=RELA PE=1 SV=2	1.21951
Q04323_K154	UBXN1	EK*AEELAAR	UBXN1_HUMAN UBX domain-containing protein 1 OS=Homo sapiens OX=9606 GN=UBXN1 PE=1 SV=2	6.25
Q04637_K1188	EIF4G1	SFSK*EVEER	IF4G1_HUMAN Eukaryotic translation initiation factor 4 gamma 1 OS=Homo sapiens OX=9606 GN=EIF4G1 PE=1 SV=4	5.55556
Q04637_K881	EIF4G1	LK*EELEEAR	IF4G1_HUMAN Eukaryotic translation initiation factor 4 gamma 1 OS=Homo sapiens OX=9606 GN=EIF4G1 PE=1 SV=4	10
Q04837_K81	SSBP1	SGDSEVYQLGDVSQK*TTWHR	SSBP_HUMAN Single-stranded DNA-binding protein, mitochondrial OS=Homo sapiens OX=9606 GN=SSBP1 PE=1 SV=1	10
Q05682_K618	CALD1	AEAAEK*R	CALD1_HUMAN Caldesmon OS=Homo sapiens OX=9606 GN=CALD1 PE=1 SV=3	5.88235
Q05682_K781	CALD1	NLWEK*QSVDK	CALD1_HUMAN Caldesmon OS=Homo sapiens OX=9606 GN=CALD1 PE=1 SV=3	7.14286
Q05D32_K92	CTDSPL2	AGEK*PNK	CTSL2_HUMAN CTD small phosphatase-like protein 2 OS=Homo sapiens OX=9606 GN=CTDSPL2 PE=1 SV=2	10
Q06323_K13	PSME1	VQPEAQAK*VDVFR	PSME1_HUMAN Proteasome activator complex subunit 1 OS=Homo sapiens OX=9606 GN=PSME1 PE=1 SV=1	9.82143
Q06323_K190	PSME1	AAK*QPHVGDYR	PSME1_HUMAN Proteasome activator complex subunit 1 OS=Homo sapiens OX=9606 GN=PSME1 PE=1 SV=1	1.1236
Q06830_K120	PRDX1	TIAQDYGVLK*ADEGISFR	PRDX1_HUMAN Peroxiredoxin-1 OS=Homo sapiens OX=9606 GN=PRDX1 PE=1 SV=1	7.05431	Cross-link	Note=Glycyl lysine isopeptide (Lys-Gly) (interchain with G-Cter in SUMO2);Ontology_term=ECO:0007744;evidence=ECO:0007744|PubMed:28112733;Dbxref=PMID:28112733
Q06830_K16	PRDX1	IGHPAPNFK*ATAVMPDGQFK	PRDX1_HUMAN Peroxiredoxin-1 OS=Homo sapiens OX=9606 GN=PRDX1 PE=1 SV=1	6.25	Modified residue	Note=N6-acetyllysine;Ontology_term=ECO:0007744;evidence=ECO:0007744|PubMed:19608861;Dbxref=PMID:19608861
Q06830_K178	PRDX1	HGEVCPAGWK*PGSDTIKPDVQK	PRDX1_HUMAN Peroxiredoxin-1 OS=Homo sapiens OX=9606 GN=PRDX1 PE=1 SV=1	0.850135
Q06830_K190	PRDX1	HGEVCPAGWKPGSDTIKPDVQK*SK	PRDX1_HUMAN Peroxiredoxin-1 OS=Homo sapiens OX=9606 GN=PRDX1 PE=1 SV=1	1.17037
Q06830_K197	PRDX1	EYFSK*QK	PRDX1_HUMAN Peroxiredoxin-1 OS=Homo sapiens OX=9606 GN=PRDX1 PE=1 SV=1	0.49505
Q06830_K67	PRDX1	AEEFK*K	PRDX1_HUMAN Peroxiredoxin-1 OS=Homo sapiens OX=9606 GN=PRDX1 PE=1 SV=1	1.07053
Q07020_K119	RPL18	AGGK*ILTFDQLALDSPK	RL18_HUMAN 60S ribosomal protein L18 OS=Homo sapiens OX=9606 GN=RPL18 PE=1 SV=2	3.75626	Cross-link	Note=Glycyl lysine isopeptide (Lys-Gly) (interchain with G-Cter in SUMO2);Ontology_term=ECO:0007744;evidence=ECO:0007744|PubMed:28112733;Dbxref=PMID:28112733
Q07020_K49	RPL18	TNSTFNQVVLK*R	RL18_HUMAN 60S ribosomal protein L18 OS=Homo sapiens OX=9606 GN=RPL18 PE=1 SV=2	10
Q07020_K71	RPL18	MK*LPGR	RL18_HUMAN 60S ribosomal protein L18 OS=Homo sapiens OX=9606 GN=RPL18 PE=1 SV=2	5.96491
Q07065_K182	CKAP4	SSQHK*QDLTEK	CKAP4_HUMAN Cytoskeleton-associated protein 4 OS=Homo sapiens OX=9606 GN=CKAP4 PE=1 SV=2	0.815375
Q07065_K191	CKAP4	AVK*QGESEVSR	CKAP4_HUMAN Cytoskeleton-associated protein 4 OS=Homo sapiens OX=9606 GN=CKAP4 PE=1 SV=2	0.970963
Q07065_K223	CKAP4	DLSDGIHVVK*DAR	CKAP4_HUMAN Cytoskeleton-associated protein 4 OS=Homo sapiens OX=9606 GN=CKAP4 PE=1 SV=2	2.86392
Q07065_K290	CKAP4	ALK*EAVK	CKAP4_HUMAN Cytoskeleton-associated protein 4 OS=Homo sapiens OX=9606 GN=CKAP4 PE=1 SV=2	1.20482
Q07065_K332	CKAP4	ELVSLK*QEQQAFK	CKAP4_HUMAN Cytoskeleton-associated protein 4 OS=Homo sapiens OX=9606 GN=CKAP4 PE=1 SV=2	5.81967
Q07065_K405	CKAP4	HSEAFEALQQK*SQGLDSR	CKAP4_HUMAN Cytoskeleton-associated protein 4 OS=Homo sapiens OX=9606 GN=CKAP4 PE=1 SV=2	3.6623
Q07065_K440	CKAP4	QTESLESLLSK*SQEHEQR	CKAP4_HUMAN Cytoskeleton-associated protein 4 OS=Homo sapiens OX=9606 GN=CKAP4 PE=1 SV=2	4.45788
Q07065_K5	CKAP4	PSAK*QR	CKAP4_HUMAN Cytoskeleton-associated protein 4 OS=Homo sapiens OX=9606 GN=CKAP4 PE=1 SV=2	1.04167
Q07065_K594	CKAP4	LFVK*VEK	CKAP4_HUMAN Cytoskeleton-associated protein 4 OS=Homo sapiens OX=9606 GN=CKAP4 PE=1 SV=2	0.673628
Q07866_K503	KLC1	QGLDNVHK*QR	KLC1_HUMAN Kinesin light chain 1 OS=Homo sapiens OX=9606 GN=KLC1 PE=1 SV=2	0.42553
Q07955_K165	SRSF1	K*EDMTYAVR	SRSF1_HUMAN Serine/arginine-rich splicing factor 1 OS=Homo sapiens OX=9606 GN=SRSF1 PE=1 SV=2	8.33333
Q07955_K174	SRSF1	K*LDNTK	SRSF1_HUMAN Serine/arginine-rich splicing factor 1 OS=Homo sapiens OX=9606 GN=SRSF1 PE=1 SV=2	0.709632
Q07955_K179	SRSF1	KLDNTK*FR	SRSF1_HUMAN Serine/arginine-rich splicing factor 1 OS=Homo sapiens OX=9606 GN=SRSF1 PE=1 SV=2	0.71275	Modified residue	Note=N6-acetyllysine;Ontology_term=ECO:0007744;evidence=ECO:0007744|PubMed:19608861;Dbxref=PMID:19608861
Q07955_K193	SRSF1	VK*VDGPR	SRSF1_HUMAN Serine/arginine-rich splicing factor 1 OS=Homo sapiens OX=9606 GN=SRSF1 PE=1 SV=2	1.52444
Q08170_K137	SRSF4	QAGEVTYADAHK*GR	SRSF4_HUMAN Serine/arginine-rich splicing factor 4 OS=Homo sapiens OX=9606 GN=SRSF4 PE=1 SV=2	2.08333
Q08211_K943	DHX9	FCEHK*R	DHX9_HUMAN ATP-dependent RNA helicase A OS=Homo sapiens OX=9606 GN=DHX9 PE=1 SV=4	1.85185
Q08945_K612	SSRP1	AMK*EYEGGR	SSRP1_HUMAN FACT complex subunit SSRP1 OS=Homo sapiens OX=9606 GN=SSRP1 PE=1 SV=1	6.25	DNA binding	Note=HMG box;Ontology_term=ECO:0000255;evidence=ECO:0000255|PROSITE-ProRule:PRU00267
Q09666_K1125	AHNAK	APDVEGQGLDWSLK*IPK	AHNK_HUMAN Neuroblast differentiation-associated protein AHNAK OS=Homo sapiens OX=9606 GN=AHNAK PE=1 SV=2	1.81818
Q09666_K128	AHNAK	IYTTK*IK	AHNK_HUMAN Neuroblast differentiation-associated protein AHNAK OS=Homo sapiens OX=9606 GN=AHNAK PE=1 SV=2	0.66269
Q09666_K134	AHNAK	LK*SEDGVEGDLGETQSR	AHNK_HUMAN Neuroblast differentiation-associated protein AHNAK OS=Homo sapiens OX=9606 GN=AHNAK PE=1 SV=2	5	Cross-link	Note=Glycyl lysine isopeptide (Lys-Gly) (interchain with G-Cter in SUMO1)%3B alternate;Ontology_term=ECO:0007744;evidence=ECO:0007744|PubMed:25114211;Dbxref=PMID:25114211
Q09666_K1488	AHNAK	APDVDIK*GPK	AHNK_HUMAN Neuroblast differentiation-associated protein AHNAK OS=Homo sapiens OX=9606 GN=AHNAK PE=1 SV=2	8.79712
Q09666_K1616	AHNAK	GPEIDVK*APK	AHNK_HUMAN Neuroblast differentiation-associated protein AHNAK OS=Homo sapiens OX=9606 GN=AHNAK PE=1 SV=2	10
Q09666_K171	AHNAK	EGAK*DIDISSPEFK	AHNK_HUMAN Neuroblast differentiation-associated protein AHNAK OS=Homo sapiens OX=9606 GN=AHNAK PE=1 SV=2	1.23457
Q09666_K203	AHNAK	HELTEISNVDVETQSGK*TVIR	AHNK_HUMAN Neuroblast differentiation-associated protein AHNAK OS=Homo sapiens OX=9606 GN=AHNAK PE=1 SV=2	9.09091
Q09666_K2349	AHNAK	GPELDVK*GPK	AHNK_HUMAN Neuroblast differentiation-associated protein AHNAK OS=Homo sapiens OX=9606 GN=AHNAK PE=1 SV=2	7.17949
Q09666_K263	AHNAK	VGGSGVNVNAK*GLDLGGR	AHNK_HUMAN Neuroblast differentiation-associated protein AHNAK OS=Homo sapiens OX=9606 GN=AHNAK PE=1 SV=2	6.07143
Q09666_K2850	AHNAK	IK*GDVDVTGPK	AHNK_HUMAN Neuroblast differentiation-associated protein AHNAK OS=Homo sapiens OX=9606 GN=AHNAK PE=1 SV=2	9.10257
Q09666_K313	AHNAK	VPK*FGVSTGR	AHNK_HUMAN Neuroblast differentiation-associated protein AHNAK OS=Homo sapiens OX=9606 GN=AHNAK PE=1 SV=2	0.95238
Q09666_K3256	AHNAK	GPALDIK*GPK	AHNK_HUMAN Neuroblast differentiation-associated protein AHNAK OS=Homo sapiens OX=9606 GN=AHNAK PE=1 SV=2	1.56174
Q09666_K326	AHNAK	EGQTPK*AGLR	AHNK_HUMAN Neuroblast differentiation-associated protein AHNAK OS=Homo sapiens OX=9606 GN=AHNAK PE=1 SV=2	1.94551
Q09666_K3308	AHNAK	LK*GDVDVSGPK	AHNK_HUMAN Neuroblast differentiation-associated protein AHNAK OS=Homo sapiens OX=9606 GN=AHNAK PE=1 SV=2	8.33333
Q09666_K341	AHNAK	VSAPEVSVGHK*GGK	AHNK_HUMAN Neuroblast differentiation-associated protein AHNAK OS=Homo sapiens OX=9606 GN=AHNAK PE=1 SV=2	1.06672
Q09666_K3782	AHNAK	MEGDLKGPEVDIK*GPK	AHNK_HUMAN Neuroblast differentiation-associated protein AHNAK OS=Homo sapiens OX=9606 GN=AHNAK PE=1 SV=2	3.87387
Q09666_K4038	AHNAK	APEVDIK*GPK	AHNK_HUMAN Neuroblast differentiation-associated protein AHNAK OS=Homo sapiens OX=9606 GN=AHNAK PE=1 SV=2	10
Q09666_K4111	AHNAK	VDIDTPDIDIHGPEGK*LK	AHNK_HUMAN Neuroblast differentiation-associated protein AHNAK OS=Homo sapiens OX=9606 GN=AHNAK PE=1 SV=2	7.69231
Q09666_K4575	AHNAK	VGIDTPDIDIHGPEGK*LK	AHNK_HUMAN Neuroblast differentiation-associated protein AHNAK OS=Homo sapiens OX=9606 GN=AHNAK PE=1 SV=2	4.8106
Q09666_K4859	AHNAK	ISIPDVDLDLK*GPK	AHNK_HUMAN Neuroblast differentiation-associated protein AHNAK OS=Homo sapiens OX=9606 GN=AHNAK PE=1 SV=2	9.02778
Q09666_K4886	AHNAK	GPEVDLK*GPR	AHNK_HUMAN Neuroblast differentiation-associated protein AHNAK OS=Homo sapiens OX=9606 GN=AHNAK PE=1 SV=2	6.09903
Q09666_K4926	AHNAK	VTAPDVDLHLK*APK	AHNK_HUMAN Neuroblast differentiation-associated protein AHNAK OS=Homo sapiens OX=9606 GN=AHNAK PE=1 SV=2	2.63158
Q09666_K4945	AHNAK	LEGGEVDLK*GPK	AHNK_HUMAN Neuroblast differentiation-associated protein AHNAK OS=Homo sapiens OX=9606 GN=AHNAK PE=1 SV=2	7.02614
Q09666_K5307	AHNAK	VSGPDLDLNLK*GPSLK	AHNK_HUMAN Neuroblast differentiation-associated protein AHNAK OS=Homo sapiens OX=9606 GN=AHNAK PE=1 SV=2	8.33333
Q09666_K537	AHNAK	GPQVALK*GSR	AHNK_HUMAN Neuroblast differentiation-associated protein AHNAK OS=Homo sapiens OX=9606 GN=AHNAK PE=1 SV=2	10
Q09666_K5443	AHNAK	GPGVDVNLK*GPR	AHNK_HUMAN Neuroblast differentiation-associated protein AHNAK OS=Homo sapiens OX=9606 GN=AHNAK PE=1 SV=2	8.76602
Q09666_K5462	AHNAK	VK*GSLGATGEIK	AHNK_HUMAN Neuroblast differentiation-associated protein AHNAK OS=Homo sapiens OX=9606 GN=AHNAK PE=1 SV=2	3.81944
Q09666_K563	AHNAK	LGSPSGK*TGTCR	AHNK_HUMAN Neuroblast differentiation-associated protein AHNAK OS=Homo sapiens OX=9606 GN=AHNAK PE=1 SV=2	0.670465
Q09666_K584	AHNAK	VK*GGVDVTLPR	AHNK_HUMAN Neuroblast differentiation-associated protein AHNAK OS=Homo sapiens OX=9606 GN=AHNAK PE=1 SV=2	10
Q09666_K599	AHNAK	VK*VPEVDVR	AHNK_HUMAN Neuroblast differentiation-associated protein AHNAK OS=Homo sapiens OX=9606 GN=AHNAK PE=1 SV=2	8.33333
Q0VAM2_K135	RASGEF1B	NLK*DLAHR	RGF1B_HUMAN Ras-GEF domain-containing family member 1B OS=Homo sapiens OX=9606 GN=RASGEF1B PE=1 SV=2	1.1544
Q12830_K1209	BPTF	IK*LEGGIK	BPTF_HUMAN Nucleosome-remodeling factor subunit BPTF OS=Homo sapiens OX=9606 GN=BPTF PE=1 SV=3	6.25	Cross-link	Note=Glycyl lysine isopeptide (Lys-Gly) (interchain with G-Cter in SUMO2);Ontology_term=ECO:0007744;evidence=ECO:0007744|PubMed:28112733;Dbxref=PMID:28112733
Q12873_K969	CHD3	LK*ADVFK	CHD3_HUMAN Chromodomain-helicase-DNA-binding protein 3 OS=Homo sapiens OX=9606 GN=CHD3 PE=1 SV=3	0.48422
Q12874_K289	SF3A3	LFSTK*GK	SF3A3_HUMAN Splicing factor 3A subunit 3 OS=Homo sapiens OX=9606 GN=SF3A3 PE=1 SV=1	0.60606
Q12874_K92	SF3A3	QIK*EFHR	SF3A3_HUMAN Splicing factor 3A subunit 3 OS=Homo sapiens OX=9606 GN=SF3A3 PE=1 SV=1	0.68493
Q12893_K289	TMEM115	QLALK*ALNER	TM115_HUMAN Transmembrane protein 115 OS=Homo sapiens OX=9606 GN=TMEM115 PE=1 SV=1	6.88321
Q12906_K81	ILF3	EGAGEQK*TEHMTR	ILF3_HUMAN Interleukin enhancer-binding factor 3 OS=Homo sapiens OX=9606 GN=ILF3 PE=1 SV=3	2.24743
Q12959_K556	DLG1	FEAK*IHDLR	DLG1_HUMAN Disks large homolog 1 OS=Homo sapiens OX=9606 GN=DLG1 PE=1 SV=2	5
Q13045_K752	FLII	LSVEHK*QR	FLII_HUMAN Protein flightless-1 homolog OS=Homo sapiens OX=9606 GN=FLII PE=1 SV=2	7.69231
Q13077_K193	TRAF1	LLAELEGK*LR	TRAF1_HUMAN TNF receptor-associated factor 1 OS=Homo sapiens OX=9606 GN=TRAF1 PE=1 SV=1	8.33333	Cross-link	Note=Glycyl lysine isopeptide (Lys-Gly) (interchain with G-Cter in ubiquitin);Ontology_term=ECO:0000269;evidence=ECO:0000269|PubMed:15468071;Dbxref=PMID:15468071
Q13144_K699	EIF2B5	K*NQQLQR	EI2BE_HUMAN Translation initiation factor eIF-2B subunit epsilon OS=Homo sapiens OX=9606 GN=EIF2B5 PE=1 SV=3	1.40845
Q13155_K70	AIMP2	LYELK*AAVDGLSK	AIMP2_HUMAN Aminoacyl tRNA synthase complex-interacting multifunctional protein 2 OS=Homo sapiens OX=9606 GN=AIMP2 PE=1 SV=2	0.44177
Q13162_K78	PRDX4	VSVADHSLHLSK*AK	PRDX4_HUMAN Peroxiredoxin-4 OS=Homo sapiens OX=9606 GN=PRDX4 PE=1 SV=1	0.89286
Q13177_K191	PAK2	PDHTK*SIYTR	PAK2_HUMAN Serine/threonine-protein kinase PAK 2 OS=Homo sapiens OX=9606 GN=PAK2 PE=1 SV=3	2.38095
Q13177_K246	PAK2	TIVSIGDPK*K	PAK2_HUMAN Serine/threonine-protein kinase PAK 2 OS=Homo sapiens OX=9606 GN=PAK2 PE=1 SV=3	0.41841
Q13185_K10	CBX3	TTLQK*MGK	CBX3_HUMAN Chromobox protein homolog 3 OS=Homo sapiens OX=9606 GN=CBX3 PE=1 SV=4	0.771843	Modified residue$Cross-link	Note=N6-acetyllysine%3B alternate;Ontology_term=ECO:0007744;evidence=ECO:0007744|PubMed:19608861;Dbxref=PMID:19608861$Note=Glycyl lysine isopeptide (Lys-Gly) (interchain with G-Cter in SUMO2)%3B alternate;Ontology_term=ECO:0007744,ECO:0007744;evidence=ECO:0007744|PubMed:25218447,ECO:0007744|PubMed:28112733;Dbxref=PMID:25218447,PMID:28112733
Q13185_K113	CBX3	DAADK*PR	CBX3_HUMAN Chromobox protein homolog 3 OS=Homo sapiens OX=9606 GN=CBX3 PE=1 SV=4	5.83333
Q13200_K66	PSMD2	LGEK*DTSLYRPALEELR	PSMD2_HUMAN 26S proteasome non-ATPase regulatory subunit 2 OS=Homo sapiens OX=9606 GN=PSMD2 PE=1 SV=3	1.47619
Q13242_K46	SRSF9	EIELK*NR	SRSF9_HUMAN Serine/arginine-rich splicing factor 9 OS=Homo sapiens OX=9606 GN=SRSF9 PE=1 SV=1	5.5942
Q13247_K143	SRSF6	QAGEVTYADAHK*ER	SRSF6_HUMAN Serine/arginine-rich splicing factor 6 OS=Homo sapiens OX=9606 GN=SRSF6 PE=1 SV=2	8.30688
Q13247_K165	SRSF6	ALDK*LDGTEINGR	SRSF6_HUMAN Serine/arginine-rich splicing factor 6 OS=Homo sapiens OX=9606 GN=SRSF6 PE=1 SV=2	0.359213	Modified residue	Note=N6-acetyllysine;Ontology_term=ECO:0000250;evidence=ECO:0000250|UniProtKB:Q3TWW8
Q13247_K182	SRSF6	LIEDK*PR	SRSF6_HUMAN Serine/arginine-rich splicing factor 6 OS=Homo sapiens OX=9606 GN=SRSF6 PE=1 SV=2	5.26316	Cross-link	Note=Glycyl lysine isopeptide (Lys-Gly) (interchain with G-Cter in SUMO2);Ontology_term=ECO:0007744;evidence=ECO:0007744|PubMed:28112733;Dbxref=PMID:28112733
Q13263_K188	TRIM28	YTK*DHTVR	TIF1B_HUMAN Transcription intermediary factor 1-beta OS=Homo sapiens OX=9606 GN=TRIM28 PE=1 SV=5	0.83333
Q13263_K199	TRIM28	STGPAK*SR	TIF1B_HUMAN Transcription intermediary factor 1-beta OS=Homo sapiens OX=9606 GN=TRIM28 PE=1 SV=5	0.901565	Cross-link	Note=Glycyl lysine isopeptide (Lys-Gly) (interchain with G-Cter in SUMO2);Ontology_term=ECO:0007744,ECO:0007744;evidence=ECO:0007744|PubMed:25218447,ECO:0007744|PubMed:28112733;Dbxref=PMID:25218447,PMID:28112733
Q13263_K266	TRIM28	LGDK*HATLQK	TIF1B_HUMAN Transcription intermediary factor 1-beta OS=Homo sapiens OX=9606 GN=TRIM28 PE=1 SV=5	0.41628	Modified residue	Note=N6-acetyllysine;Ontology_term=ECO:0000250;evidence=ECO:0000250|UniProtKB:Q62318
Q13283_K59	G3BP1	PADAVYGQK*EIHR	G3BP1_HUMAN Ras GTPase-activating protein-binding protein 1 OS=Homo sapiens OX=9606 GN=G3BP1 PE=1 SV=1	0.79365
Q13347_K264	EIF3I	IGK*FEAR	EIF3I_HUMAN Eukaryotic translation initiation factor 3 subunit I OS=Homo sapiens OX=9606 GN=EIF3I PE=1 SV=1	2.38076	Modified residue	Note=N6-acetyllysine;Ontology_term=ECO:0007744;evidence=ECO:0007744|PubMed:19608861;Dbxref=PMID:19608861
Q13409_K213	DYNC1I2	APPHELTEEEK*QQILHSEEFLSFFDHSTR	DC1I2_HUMAN Cytoplasmic dynein 1 intermediate chain 2 OS=Homo sapiens OX=9606 GN=DYNC1I2 PE=1 SV=3	8.33333
Q13428_K31	TCOF1	EVK*EQSGQK	TCOF_HUMAN Treacle protein OS=Homo sapiens OX=9606 GN=TCOF1 PE=1 SV=3	0.96181
Q13439_K1207	GOLGA4	SLEFK*K	GOGA4_HUMAN Golgin subfamily A member 4 OS=Homo sapiens OX=9606 GN=GOLGA4 PE=1 SV=1	0.82735
Q13439_K1737	GOLGA4	TYEEK*ISVLQR	GOGA4_HUMAN Golgin subfamily A member 4 OS=Homo sapiens OX=9606 GN=GOLGA4 PE=1 SV=1	0.5102
Q13442_K172	PDAP1	DDATLSGK*R	HAP28_HUMAN 28 kDa heat- and acid-stable phosphoprotein OS=Homo sapiens OX=9606 GN=PDAP1 PE=1 SV=1	6.25
Q13509_K58	TUBB3	ISVYYNEASSHK*YVPR	TBB3_HUMAN Tubulin beta-3 chain OS=Homo sapiens OX=9606 GN=TUBB3 PE=1 SV=2	1.13636
Q13557_K268	CAMK2D	ITASEALK*HPWICQR	KCC2D_HUMAN Calcium/calmodulin-dependent protein kinase type II subunit delta OS=Homo sapiens OX=9606 GN=CAMK2D PE=1 SV=3	3.76007
Q13561_K229	DCTN2	VAELEK*R	DCTN2_HUMAN Dynactin subunit 2 OS=Homo sapiens OX=9606 GN=DCTN2 PE=1 SV=4	7.14286
Q13561_K65	DCTN2	VGTK*GLDFSDR	DCTN2_HUMAN Dynactin subunit 2 OS=Homo sapiens OX=9606 GN=DCTN2 PE=1 SV=4	1.40845
Q13601_K230	KRR1	ELAK*DSELR	KRR1_HUMAN KRR1 small subunit processome component homolog OS=Homo sapiens OX=9606 GN=KRR1 PE=1 SV=4	1.10387
Q13620_K789	CUL4B	TLQSLACGK*AR	CUL4B_HUMAN Cullin-4B OS=Homo sapiens OX=9606 GN=CUL4B PE=1 SV=4	7.69231
Q13813_K1132	SPTAN1	K*FDDFQK	SPTN1_HUMAN Spectrin alpha chain, non-erythrocytic 1 OS=Homo sapiens OX=9606 GN=SPTAN1 PE=1 SV=3	1.00952
Q13813_K1274	SPTAN1	K*HEGFER	SPTN1_HUMAN Spectrin alpha chain, non-erythrocytic 1 OS=Homo sapiens OX=9606 GN=SPTAN1 PE=1 SV=3	5.59218
Q13813_K1334	SPTAN1	AK*LGDSHDLQR	SPTN1_HUMAN Spectrin alpha chain, non-erythrocytic 1 OS=Homo sapiens OX=9606 GN=SPTAN1 PE=1 SV=3	0.840855
Q13813_K1419	SPTAN1	QK*LDILDQER	SPTN1_HUMAN Spectrin alpha chain, non-erythrocytic 1 OS=Homo sapiens OX=9606 GN=SPTAN1 PE=1 SV=3	2.01328
Q13813_K1486	SPTAN1	K*HEDFDK	SPTN1_HUMAN Spectrin alpha chain, non-erythrocytic 1 OS=Homo sapiens OX=9606 GN=SPTAN1 PE=1 SV=3	0.87619
Q13813_K1543	SPTAN1	AQMIEK*R	SPTN1_HUMAN Spectrin alpha chain, non-erythrocytic 1 OS=Homo sapiens OX=9606 GN=SPTAN1 PE=1 SV=3	5.40936
Q13813_K1630	SPTAN1	GACAGSEDAVK*AR	SPTN1_HUMAN Spectrin alpha chain, non-erythrocytic 1 OS=Homo sapiens OX=9606 GN=SPTAN1 PE=1 SV=3	10
Q13813_K1759	SPTAN1	AK*LNESHR	SPTN1_HUMAN Spectrin alpha chain, non-erythrocytic 1 OS=Homo sapiens OX=9606 GN=SPTAN1 PE=1 SV=3	2.09446
Q13813_K214	SPTAN1	VNEVNQFAAK*LIQEQHPEEELIK	SPTN1_HUMAN Spectrin alpha chain, non-erythrocytic 1 OS=Homo sapiens OX=9606 GN=SPTAN1 PE=1 SV=3	7.69231
Q13813_K2251	SPTAN1	K*HQEIR	SPTN1_HUMAN Spectrin alpha chain, non-erythrocytic 1 OS=Homo sapiens OX=9606 GN=SPTAN1 PE=1 SV=3	1.28949
Q13813_K241	SPTAN1	LK*GLALQR	SPTN1_HUMAN Spectrin alpha chain, non-erythrocytic 1 OS=Homo sapiens OX=9606 GN=SPTAN1 PE=1 SV=3	10
Q13813_K250	SPTAN1	QGK*LFGAAEVQR	SPTN1_HUMAN Spectrin alpha chain, non-erythrocytic 1 OS=Homo sapiens OX=9606 GN=SPTAN1 PE=1 SV=3	6.66667
Q13813_K296	SPTAN1	K*HEGLER	SPTN1_HUMAN Spectrin alpha chain, non-erythrocytic 1 OS=Homo sapiens OX=9606 GN=SPTAN1 PE=1 SV=3	1.88937
Q13813_K30	SPTAN1	FK*ELSTLR	SPTN1_HUMAN Spectrin alpha chain, non-erythrocytic 1 OS=Homo sapiens OX=9606 GN=SPTAN1 PE=1 SV=3	3.30105
Q13813_K310	SPTAN1	DLAALEDK*VK	SPTN1_HUMAN Spectrin alpha chain, non-erythrocytic 1 OS=Homo sapiens OX=9606 GN=SPTAN1 PE=1 SV=3	1.2484
Q13813_K441	SPTAN1	EK*LTVLSEER	SPTN1_HUMAN Spectrin alpha chain, non-erythrocytic 1 OS=Homo sapiens OX=9606 GN=SPTAN1 PE=1 SV=3	6.66667
Q13813_K637	SPTAN1	AGQK*LIDVNHYAK	SPTN1_HUMAN Spectrin alpha chain, non-erythrocytic 1 OS=Homo sapiens OX=9606 GN=SPTAN1 PE=1 SV=3	3.07086	Modified residue	Note=N6-acetyllysine;Ontology_term=ECO:0007744;evidence=ECO:0007744|PubMed:19608861;Dbxref=PMID:19608861
Q13813_K758	SPTAN1	K*QEALVAR	SPTN1_HUMAN Spectrin alpha chain, non-erythrocytic 1 OS=Homo sapiens OX=9606 GN=SPTAN1 PE=1 SV=3	2.53918
Q13813_K803	SPTAN1	EK*EPIAASTNR	SPTN1_HUMAN Spectrin alpha chain, non-erythrocytic 1 OS=Homo sapiens OX=9606 GN=SPTAN1 PE=1 SV=3	3.40566	Modified residue	Note=N6-acetyllysine;Ontology_term=ECO:0000250;evidence=ECO:0000250|UniProtKB:P16546
Q13838_K334	DDX39B	YQQFK*DFQR	DX39B_HUMAN Spliceosome RNA helicase DDX39B OS=Homo sapiens OX=9606 GN=DDX39B PE=1 SV=1	9.16667
Q13885_K297	TUBB2A	ALTVPELTQQMFDSK*NMMAACDPR	TBB2A_HUMAN Tubulin beta-2A chain OS=Homo sapiens OX=9606 GN=TUBB2A PE=1 SV=1	6.25
Q13885_K58	TUBB2A	INVYYNEAAGNK*YVPR	TBB2A_HUMAN Tubulin beta-2A chain OS=Homo sapiens OX=9606 GN=TUBB2A PE=1 SV=1	8.33333	Modified residue$Cross-link	Note=N6-acetyllysine%3B alternate;Ontology_term=ECO:0000250;evidence=ECO:0000250|UniProtKB:P07437$Note=Glycyl lysine isopeptide (Lys-Gly) (interchain with G-Cter in ubiquitin)%3B alternate;Ontology_term=ECO:0000250;evidence=ECO:0000250|UniProtKB:P07437
Q14011_K84	CIRBP	VDQAGK*SSDNR	CIRBP_HUMAN Cold-inducible RNA-binding protein OS=Homo sapiens OX=9606 GN=CIRBP PE=1 SV=1	7.14286
Q14103_K197	HNRNPD	IFVGGLSPDTPEEK*IR	HNRPD_HUMAN Heterogeneous nuclear ribonucleoprotein D0 OS=Homo sapiens OX=9606 GN=HNRNPD PE=1 SV=1	0.993547	Cross-link	Note=Glycyl lysine isopeptide (Lys-Gly) (interchain with G-Cter in SUMO2);Ontology_term=ECO:0007744,ECO:0007744;evidence=ECO:0007744|PubMed:25114211,ECO:0007744|PubMed:28112733;Dbxref=PMID:25114211,PMID:28112733
Q14152_K603	EIF3A	EAELQK*VR	EIF3A_HUMAN Eukaryotic translation initiation factor 3 subunit A OS=Homo sapiens OX=9606 GN=EIF3A PE=1 SV=1	4.29708
Q14152_K632	EIF3A	ILQEHEQIK*K	EIF3A_HUMAN Eukaryotic translation initiation factor 3 subunit A OS=Homo sapiens OX=9606 GN=EIF3A PE=1 SV=1	1.15034
Q14152_K694	EIF3A	K*IDYFER	EIF3A_HUMAN Eukaryotic translation initiation factor 3 subunit A OS=Homo sapiens OX=9606 GN=EIF3A PE=1 SV=1	0.93458
Q14197_K98	MRPL58	VNSK*AEVR	ICT1_HUMAN Peptidyl-tRNA hydrolase ICT1, mitochondrial OS=Homo sapiens OX=9606 GN=MRPL58 PE=1 SV=1	1.07527
Q14204_K1610	DYNC1H1	LADLLGK*IQK	DYHC1_HUMAN Cytoplasmic dynein 1 heavy chain 1 OS=Homo sapiens OX=9606 GN=DYNC1H1 PE=1 SV=5	0.835087
Q14204_K1917	DYNC1H1	TESVK*ALGHQLGR	DYHC1_HUMAN Cytoplasmic dynein 1 heavy chain 1 OS=Homo sapiens OX=9606 GN=DYNC1H1 PE=1 SV=5	0.635055
Q14204_K2043	DYNC1H1	SLAMTK*PDR	DYHC1_HUMAN Cytoplasmic dynein 1 heavy chain 1 OS=Homo sapiens OX=9606 GN=DYNC1H1 PE=1 SV=5	1.47059
Q14204_K2239	DYNC1H1	VLLK*ALER	DYHC1_HUMAN Cytoplasmic dynein 1 heavy chain 1 OS=Homo sapiens OX=9606 GN=DYNC1H1 PE=1 SV=5	0.87506
Q14204_K2286	DYNC1H1	K*IIDSVR	DYHC1_HUMAN Cytoplasmic dynein 1 heavy chain 1 OS=Homo sapiens OX=9606 GN=DYNC1H1 PE=1 SV=5	0.540723
Q14204_K2856	DYNC1H1	WTDENIDTVALK*HFPNIDR	DYHC1_HUMAN Cytoplasmic dynein 1 heavy chain 1 OS=Homo sapiens OX=9606 GN=DYNC1H1 PE=1 SV=5	5.84967
Q14204_K3471	DYNC1H1	ADLAAVEAK*VNR	DYHC1_HUMAN Cytoplasmic dynein 1 heavy chain 1 OS=Homo sapiens OX=9606 GN=DYNC1H1 PE=1 SV=5	3.125
Q14204_K3621	DYNC1H1	K*NLESALR	DYHC1_HUMAN Cytoplasmic dynein 1 heavy chain 1 OS=Homo sapiens OX=9606 GN=DYNC1H1 PE=1 SV=5	1.75439
Q14204_K671	DYNC1H1	VEDVLGK*GWENHVEGQK	DYHC1_HUMAN Cytoplasmic dynein 1 heavy chain 1 OS=Homo sapiens OX=9606 GN=DYNC1H1 PE=1 SV=5	1.05263
Q14204_K872	DYNC1H1	SLETCMYDHK*TFSEILNR	DYHC1_HUMAN Cytoplasmic dynein 1 heavy chain 1 OS=Homo sapiens OX=9606 GN=DYNC1H1 PE=1 SV=5	3.69876
Q14247_K107	CTTN	SAVGHEYQSK*LSK	SRC8_HUMAN Src substrate cortactin OS=Homo sapiens OX=9606 GN=CTTN PE=1 SV=2	0.46446	Modified residue	Note=N6-acetyllysine;Ontology_term=ECO:0000250;evidence=ECO:0000250|UniProtKB:Q60598
Q14247_K87	CTTN	ASHGYGGK*FGVEQDR	SRC8_HUMAN Src substrate cortactin OS=Homo sapiens OX=9606 GN=CTTN PE=1 SV=2	0.585052	Modified residue	Note=N6-acetyllysine;Ontology_term=ECO:0007744;evidence=ECO:0007744|PubMed:19608861;Dbxref=PMID:19608861
Q14315_K1299	FLNC	VLNPSGAK*TDTYVTDNGDGTYR	FLNC_HUMAN Filamin-C OS=Homo sapiens OX=9606 GN=FLNC PE=1 SV=3	5.55556
Q14315_K1367	FLNC	AFGPGLEGGLVNK*ANR	FLNC_HUMAN Filamin-C OS=Homo sapiens OX=9606 GN=FLNC PE=1 SV=3	8.96653
Q14315_K1438	FLNC	VPVK*DVVDPGK	FLNC_HUMAN Filamin-C OS=Homo sapiens OX=9606 GN=FLNC PE=1 SV=3	2.97823
Q14315_K1935	FLNC	FDDK*HIPGSPFTAK	FLNC_HUMAN Filamin-C OS=Homo sapiens OX=9606 GN=FLNC PE=1 SV=3	8.39286
Q14315_K1994	FLNC	APSGNEEPCLLK*R	FLNC_HUMAN Filamin-C OS=Homo sapiens OX=9606 GN=FLNC PE=1 SV=3	7.54608
Q14315_K2135	FLNC	MK*ESITR	FLNC_HUMAN Filamin-C OS=Homo sapiens OX=9606 GN=FLNC PE=1 SV=3	1.09547
Q14315_K492	FLNC	VK*EVADFK	FLNC_HUMAN Filamin-C OS=Homo sapiens OX=9606 GN=FLNC PE=1 SV=3	2.37556
Q14315_K517	FLNC	GPK*GTEEPVK	FLNC_HUMAN Filamin-C OS=Homo sapiens OX=9606 GN=FLNC PE=1 SV=3	6.66667
Q14315_K524	FLNC	GTEEPVK*VR	FLNC_HUMAN Filamin-C OS=Homo sapiens OX=9606 GN=FLNC PE=1 SV=3	0.67568
Q14315_K573	FLNC	SPFEVQVSPEAGVQK*VR	FLNC_HUMAN Filamin-C OS=Homo sapiens OX=9606 GN=FLNC PE=1 SV=3	1.28205
Q14315_K871	FLNC	VK*AEGPGLNR	FLNC_HUMAN Filamin-C OS=Homo sapiens OX=9606 GN=FLNC PE=1 SV=3	1.8962
Q14320_K236	FAM50A	K*DFSELR	FA50A_HUMAN Protein FAM50A OS=Homo sapiens OX=9606 GN=FAM50A PE=1 SV=2	6.66667
Q14444_K234	CAPRIN1	VLK*EIVER	CAPR1_HUMAN Caprin-1 OS=Homo sapiens OX=9606 GN=CAPRIN1 PE=1 SV=2	2.21231
Q14498_K322	RBM39	PMK*VGHVTER	RBM39_HUMAN RNA-binding protein 39 OS=Homo sapiens OX=9606 GN=RBM39 PE=1 SV=2	1.36825
Q14563_K108	SEMA3A	WAGK*DILK	SEM3A_HUMAN Semaphorin-3A OS=Homo sapiens OX=9606 GN=SEMA3A PE=1 SV=1	1.14943	Disulfide bond	Ontology_term=ECO:0000250;evidence=ECO:0000250
Q14566_K205	MCM6	FVDFQK*VR	MCM6_HUMAN DNA replication licensing factor MCM6 OS=Homo sapiens OX=9606 GN=MCM6 PE=1 SV=1	1.42374
Q14566_K599	MCM6	ESEDFIVEQYK*HLR	MCM6_HUMAN DNA replication licensing factor MCM6 OS=Homo sapiens OX=9606 GN=MCM6 PE=1 SV=1	3.13876
Q14671_K869	PUM1	FIQLK*LER	PUM1_HUMAN Pumilio homolog 1 OS=Homo sapiens OX=9606 GN=PUM1 PE=1 SV=3	1.60621
Q14697_K472	GANAB	LVAIVDPHIK*VDSGYR	GANAB_HUMAN Neutral alpha-glucosidase AB OS=Homo sapiens OX=9606 GN=GANAB PE=1 SV=3	10
Q14738_K96	PPP2R5D	FNLSK*NR	2A5D_HUMAN Serine/threonine-protein phosphatase 2A 56 kDa regulatory subunit delta isoform OS=Homo sapiens OX=9606 GN=PPP2R5D PE=1 SV=1	7.5
Q14739_K107	LBR	SASASHQADIK*EAR	LBR_HUMAN Delta(14)-sterol reductase LBR OS=Homo sapiens OX=9606 GN=LBR PE=1 SV=2	1.08251
Q14739_K64	LBR	K*GGSTSSSPSR	LBR_HUMAN Delta(14)-sterol reductase LBR OS=Homo sapiens OX=9606 GN=LBR PE=1 SV=2	1.88679
Q14764_K593	MVP	GAVASVTFDDFHK*NSAR	MVP_HUMAN Major vault protein OS=Homo sapiens OX=9606 GN=MVP PE=1 SV=4	9.09091
Q14847_K112	LASP1	K*TQDQISNIK	LASP1_HUMAN LIM and SH3 domain protein 1 OS=Homo sapiens OX=9606 GN=LASP1 PE=1 SV=2	0.45198	Modified residue	Note=N6-succinyllysine;Ontology_term=ECO:0000250;evidence=ECO:0000250|UniProtKB:Q61792
Q14847_K121	LASP1	TQDQISNIK*YHEEFEK	LASP1_HUMAN LIM and SH3 domain protein 1 OS=Homo sapiens OX=9606 GN=LASP1 PE=1 SV=2	3.84495
Q14847_K128	LASP1	YHEEFEK*SR	LASP1_HUMAN LIM and SH3 domain protein 1 OS=Homo sapiens OX=9606 GN=LASP1 PE=1 SV=2	4.06331
Q14847_K75	LASP1	LK*QQSELQSQVR	LASP1_HUMAN LIM and SH3 domain protein 1 OS=Homo sapiens OX=9606 GN=LASP1 PE=1 SV=2	3.10503	Modified residue	Note=N6-methyllysine;Ontology_term=ECO:0007744;evidence=ECO:0007744|PubMed:24129315;Dbxref=PMID:24129315
Q14847_K87	LASP1	YK*EEFEK	LASP1_HUMAN LIM and SH3 domain protein 1 OS=Homo sapiens OX=9606 GN=LASP1 PE=1 SV=2	2.90525
Q14974_K211	KPNB1	ANFDK*ESER	IMB1_HUMAN Importin subunit beta-1 OS=Homo sapiens OX=9606 GN=KPNB1 PE=1 SV=2	1.07143	Modified residue	Note=N6-acetyllysine;Ontology_term=ECO:0007744;evidence=ECO:0007744|PubMed:19608861;Dbxref=PMID:19608861
Q14978_K647	NOLC1	VADNSFDAK*R	NOLC1_HUMAN Nucleolar and coiled-body phosphoprotein 1 OS=Homo sapiens OX=9606 GN=NOLC1 PE=1 SV=2	7.5	Cross-link	Note=Glycyl lysine isopeptide (Lys-Gly) (interchain with G-Cter in SUMO2);Ontology_term=ECO:0007744;evidence=ECO:0007744|PubMed:28112733;Dbxref=PMID:28112733
Q14980_K1935	NUMA1	VCPPHLK*TCYPLESR	NUMA1_HUMAN Nuclear mitotic apparatus protein 1 OS=Homo sapiens OX=9606 GN=NUMA1 PE=1 SV=2	0.9669
Q14980_K379	NUMA1	CLEEK*NEILQGK	NUMA1_HUMAN Nuclear mitotic apparatus protein 1 OS=Homo sapiens OX=9606 GN=NUMA1 PE=1 SV=2	0.40323	Modified residue	Note=N6-acetyllysine;Ontology_term=ECO:0007744;evidence=ECO:0007744|PubMed:19608861;Dbxref=PMID:19608861
Q14980_K751	NUMA1	SLVEQHK*R	NUMA1_HUMAN Nuclear mitotic apparatus protein 1 OS=Homo sapiens OX=9606 GN=NUMA1 PE=1 SV=2	0.384155
Q14C86_K1035	GAPVD1	LSAQAQVAEDILDK*YR	GAPD1_HUMAN GTPase-activating protein and VPS9 domain-containing protein 1 OS=Homo sapiens OX=9606 GN=GAPVD1 PE=1 SV=2	1.5873
Q15005_K71	SPCS2	VLLEK*YK	SPCS2_HUMAN Signal peptidase complex subunit 2 OS=Homo sapiens OX=9606 GN=SPCS2 PE=1 SV=3	0.39683
Q15008_K117	PSMD6	IGDK*EGALTAFR	PSMD6_HUMAN 26S proteasome non-ATPase regulatory subunit 6 OS=Homo sapiens OX=9606 GN=PSMD6 PE=1 SV=1	0.96883
Q15008_K163	PSMD6	NTEK*AK	PSMD6_HUMAN 26S proteasome non-ATPase regulatory subunit 6 OS=Homo sapiens OX=9606 GN=PSMD6 PE=1 SV=1	0.442088
Q15021_K416	NCAPD2	LADK*SVLVCK	CND1_HUMAN Condensin complex subunit 1 OS=Homo sapiens OX=9606 GN=NCAPD2 PE=1 SV=3	0.84746
Q15041_K188	ARL6IP1	YIGMAK*R	AR6P1_HUMAN ADP-ribosylation factor-like protein 6-interacting protein 1 OS=Homo sapiens OX=9606 GN=ARL6IP1 PE=1 SV=2	0.50505
Q15041_K96	ARL6IP1	IFGSNK*WTTEQQQR	AR6P1_HUMAN ADP-ribosylation factor-like protein 6-interacting protein 1 OS=Homo sapiens OX=9606 GN=ARL6IP1 PE=1 SV=2	10
Q15046_K175	KARS1	SEEEFIHINNK*LR	SYK_HUMAN Lysine--tRNA ligase OS=Homo sapiens OX=9606 GN=KARS1 PE=1 SV=3	2.30024
Q15056_K123	EIF4H	KQDK*GGFGFR	IF4H_HUMAN Eukaryotic translation initiation factor 4H OS=Homo sapiens OX=9606 GN=EIF4H PE=1 SV=5	7.54741
Q15080_K317	NCF4	GLPSQK*R	NCF4_HUMAN Neutrophil cytosol factor 4 OS=Homo sapiens OX=9606 GN=NCF4 PE=1 SV=2	0.43287
Q15084_K150	PDIA6	SGGYSSGK*QGR	PDIA6_HUMAN Protein disulfide-isomerase A6 OS=Homo sapiens OX=9606 GN=PDIA6 PE=1 SV=1	3.87467
Q15084_K159	PDIA6	SDSSSK*K	PDIA6_HUMAN Protein disulfide-isomerase A6 OS=Homo sapiens OX=9606 GN=PDIA6 PE=1 SV=1	1.96078
Q15084_K66	PDIA6	LTPEWK*K	PDIA6_HUMAN Protein disulfide-isomerase A6 OS=Homo sapiens OX=9606 GN=PDIA6 PE=1 SV=1	1.78571
Q15084_K73	PDIA6	AATALK*DVVK	PDIA6_HUMAN Protein disulfide-isomerase A6 OS=Homo sapiens OX=9606 GN=PDIA6 PE=1 SV=1	6.97115
Q15084_K85	PDIA6	VGAVDADK*HHSLGGQYGVQGFPTIK	PDIA6_HUMAN Protein disulfide-isomerase A6 OS=Homo sapiens OX=9606 GN=PDIA6 PE=1 SV=1	5.00447
Q15126_K48	PMVK	LSGPLK*EQYAQEHGLNFQR	PMVK_HUMAN Phosphomevalonate kinase OS=Homo sapiens OX=9606 GN=PMVK PE=1 SV=3	1.08696
Q15149_K1150	PLEC	LPLDK*EPAR	PLEC_HUMAN Plectin OS=Homo sapiens OX=9606 GN=PLEC PE=1 SV=3	10
Q15149_K1165	PLEC	IAEQQK*AQAEVEGLGK	PLEC_HUMAN Plectin OS=Homo sapiens OX=9606 GN=PLEC PE=1 SV=3	3.33333
Q15149_K1175	PLEC	AQAEVEGLGK*GVAR	PLEC_HUMAN Plectin OS=Homo sapiens OX=9606 GN=PLEC PE=1 SV=3	1.17338
Q15149_K1508	PLEC	LAEVEAALEK*QR	PLEC_HUMAN Plectin OS=Homo sapiens OX=9606 GN=PLEC PE=1 SV=3	10
Q15149_K1520	PLEC	QLAEAHAQAK*AQAER	PLEC_HUMAN Plectin OS=Homo sapiens OX=9606 GN=PLEC PE=1 SV=3	4.26781
Q15149_K1552	PLEC	REEAAVDAQQQK*R	PLEC_HUMAN Plectin OS=Homo sapiens OX=9606 GN=PLEC PE=1 SV=3	5.9895
Q15149_K1626	PLEC	AEEAEAQK*R	PLEC_HUMAN Plectin OS=Homo sapiens OX=9606 GN=PLEC PE=1 SV=3	6.66667
Q15149_K1659	PLEC	VK*AEAEAAR	PLEC_HUMAN Plectin OS=Homo sapiens OX=9606 GN=PLEC PE=1 SV=3	5.76968
Q15149_K1718	PLEC	SAEAELQSK*R	PLEC_HUMAN Plectin OS=Homo sapiens OX=9606 GN=PLEC PE=1 SV=3	5.22368
Q15149_K1725	PLEC	ASFAEK*TAQLER	PLEC_HUMAN Plectin OS=Homo sapiens OX=9606 GN=PLEC PE=1 SV=3	5.0348	Modified residue	Note=N6-acetyllysine;Ontology_term=ECO:0000250;evidence=ECO:0000250|UniProtKB:Q9QXS1
Q15149_K1774	PLEC	WQLK*ANEALR	PLEC_HUMAN Plectin OS=Homo sapiens OX=9606 GN=PLEC PE=1 SV=3	10
Q15149_K1815	PLEC	GK*AEEQAVR	PLEC_HUMAN Plectin OS=Homo sapiens OX=9606 GN=PLEC PE=1 SV=3	1.11111
Q15149_K1886	PLEC	EAAAATQK*R	PLEC_HUMAN Plectin OS=Homo sapiens OX=9606 GN=PLEC PE=1 SV=3	3.47837
Q15149_K1896	PLEC	RQELEAELAK*VR	PLEC_HUMAN Plectin OS=Homo sapiens OX=9606 GN=PLEC PE=1 SV=3	6.97115
Q15149_K1908	PLEC	AEMEVLLASK*AR	PLEC_HUMAN Plectin OS=Homo sapiens OX=9606 GN=PLEC PE=1 SV=3	6.77782
Q15149_K1951	PLEC	ALAEEAK*R	PLEC_HUMAN Plectin OS=Homo sapiens OX=9606 GN=PLEC PE=1 SV=3	4.06761
Q15149_K1975	PLEC	VLAEK*LAAIGEATR	PLEC_HUMAN Plectin OS=Homo sapiens OX=9606 GN=PLEC PE=1 SV=3	5.55556
Q15149_K1986	PLEC	LK*TEAEIALK	PLEC_HUMAN Plectin OS=Homo sapiens OX=9606 GN=PLEC PE=1 SV=3	3.28125
[truncated: 440 more rows]

## Sheet: ONAyne, 100 µM vs 10 µM
Identifier	Genename	Modified sequences	Description	ONAyne_100 µM vs 10 µM	Annotation	Modification
A0AVT1_K544	UBA6	IDAHLNK*VCPTTETIYNDEFYTK	UBA6_HUMAN Ubiquitin-like modifier-activating enzyme 6 OS=Homo sapiens OX=9606 GN=UBA6 PE=1 SV=1	0.9434	Modified residue	Note=N6-acetyllysine;Ontology_term=ECO:0007744;evidence=ECO:0007744|PubMed:19608861;Dbxref=PMID:19608861
A0AVT1_K800	UBA6	IQEFKPSNK*VVQTDETAR	UBA6_HUMAN Ubiquitin-like modifier-activating enzyme 6 OS=Homo sapiens OX=9606 GN=UBA6 PE=1 SV=1	7.67045
A6NDU8_K259	C5orf51	EVGEK*ILK	CE051_HUMAN UPF0600 protein C5orf51 OS=Homo sapiens OX=9606 GN=C5orf51 PE=1 SV=1	10
A6NDU8_K46	C5orf51	ASAALEK*LK	CE051_HUMAN UPF0600 protein C5orf51 OS=Homo sapiens OX=9606 GN=C5orf51 PE=1 SV=1	10
A8MU46_K381	SMTNL1	AAGAAIGGVK*	SMTL1_HUMAN Smoothelin-like protein 1 OS=Homo sapiens OX=9606 GN=SMTNL1 PE=1 SV=2	6.29734
B1AJZ9_K1374	FHAD1	QQK*VGTR	FHAD1_HUMAN Forkhead-associated domain-containing protein 1 OS=Homo sapiens OX=9606 GN=FHAD1 PE=2 SV=2	5.88235
C9JCN9_K52	HSBP1L1	IEDLQK*NVK	HSBPL_HUMAN Heat shock factor-binding protein 1-like protein 1 OS=Homo sapiens OX=9606 GN=HSBP1L1 PE=1 SV=2	5.88235
E9PAV3_K2005	NACA	IEDLSQQAQLAAAEK*FK	NACAM_HUMAN Nascent polypeptide-associated complex subunit alpha, muscle-specific form OS=Homo sapiens OX=9606 GN=NACA PE=1 SV=1	0.57143	Modified residue$Cross-link	Note=N6-acetyllysine%3B alternate;Ontology_term=ECO:0007744;evidence=ECO:0007744|PubMed:19608861;Dbxref=PMID:19608861$Note=Glycyl lysine isopeptide (Lys-Gly) (interchain with G-Cter in SUMO2)%3B alternate;Ontology_term=ECO:0007744;evidence=ECO:0007744|PubMed:28112733;Dbxref=PMID:28112733
O00116_K347	AGPS	GIIEK*SCQGPR	ADAS_HUMAN Alkyldihydroxyacetonephosphate synthase, peroxisomal OS=Homo sapiens OX=9606 GN=AGPS PE=1 SV=1	5.71062	Modified residue	Note=N6-acetyllysine;Ontology_term=ECO:0007744;evidence=ECO:0007744|PubMed:19608861;Dbxref=PMID:19608861
O00148_K162	DDX39A	K*NCPHVVVGTPGR	DX39A_HUMAN ATP-dependent RNA helicase DDX39A OS=Homo sapiens OX=9606 GN=DDX39A PE=1 SV=2	7.73809	Cross-link	Note=Glycyl lysine isopeptide (Lys-Gly) (interchain with G-Cter in SUMO2);Ontology_term=ECO:0007744;evidence=ECO:0007744|PubMed:28112733;Dbxref=PMID:28112733
O00148_K190	DDX39A	NVK*HFVLDECDK	DX39A_HUMAN ATP-dependent RNA helicase DDX39A OS=Homo sapiens OX=9606 GN=DDX39A PE=1 SV=2	10
O00154_K198	ACOT7	YEAQK*LER	BACH_HUMAN Cytosolic acyl coenzyme A thioester hydrolase OS=Homo sapiens OX=9606 GN=ACOT7 PE=1 SV=3	6.22685	Modified residue	Note=N6-acetyllysine;Ontology_term=ECO:0007744;evidence=ECO:0007744|PubMed:19608861;Dbxref=PMID:19608861
O00154_K369	ACOT7	YLQMK*AK	BACH_HUMAN Cytosolic acyl coenzyme A thioester hydrolase OS=Homo sapiens OX=9606 GN=ACOT7 PE=1 SV=3	7.46497
O00159_K868	MYO1C	SISPEWK*QQLQQK	MYO1C_HUMAN Unconventional myosin-Ic OS=Homo sapiens OX=9606 GN=MYO1C PE=1 SV=4	8.11688
O00159_K882	MYO1C	AVASEIFK*GK	MYO1C_HUMAN Unconventional myosin-Ic OS=Homo sapiens OX=9606 GN=MYO1C PE=1 SV=4	10
O00170_K112	AIP	NIAVGK*DPLEGQR	AIP_HUMAN AH receptor-interacting protein OS=Homo sapiens OX=9606 GN=AIP PE=1 SV=2	7.67045
O00170_K196	AIP	EGHVK*EAAAK	AIP_HUMAN AH receptor-interacting protein OS=Homo sapiens OX=9606 GN=AIP PE=1 SV=2	10
O00193_K62	SMAP	LVIGDHK*STSHFR	SMAP_HUMAN Small acidic protein OS=Homo sapiens OX=9606 GN=SMAP PE=1 SV=1	10	Cross-link	Note=Glycyl lysine isopeptide (Lys-Gly) (interchain with G-Cter in SUMO2);Ontology_term=ECO:0007744;evidence=ECO:0007744|PubMed:28112733;Dbxref=PMID:28112733
O00231_K358	PSMD11	LSK*ADVER	PSD11_HUMAN 26S proteasome non-ATPase regulatory subunit 11 OS=Homo sapiens OX=9606 GN=PSMD11 PE=1 SV=3	1.07527
O00232_K221	PSMD12	FFQEENTEK*LK	PSD12_HUMAN 26S proteasome non-ATPase regulatory subunit 12 OS=Homo sapiens OX=9606 GN=PSMD12 PE=1 SV=3	9.69373	Modified residue	Note=N6-acetyllysine;Ontology_term=ECO:0007744;evidence=ECO:0007744|PubMed:19608861;Dbxref=PMID:19608861
O00244_K25	ATOX1	VLNK*LGGVK	ATOX1_HUMAN Copper transport protein ATOX1 OS=Homo sapiens OX=9606 GN=ATOX1 PE=1 SV=1	7.14286
O00244_K3	ATOX1	PK*HEFSVDMTCGGCAEAVSR	ATOX1_HUMAN Copper transport protein ATOX1 OS=Homo sapiens OX=9606 GN=ATOX1 PE=1 SV=1	10
O00264_K102	PGRMC1	VFDVTK*GR	PGRC1_HUMAN Membrane-associated progesterone receptor component 1 OS=Homo sapiens OX=9606 GN=PGRMC1 PE=1 SV=3	3.91363
O00410_K108	IPO5	K*VCDIAAELAR	IPO5_HUMAN Importin-5 OS=Homo sapiens OX=9606 GN=IPO5 PE=1 SV=4	10
O00410_K548	IPO5	HIVENAVQK*ELR	IPO5_HUMAN Importin-5 OS=Homo sapiens OX=9606 GN=IPO5 PE=1 SV=4	5.88235
O00410_K800	IPO5	AK*LEEHFK	IPO5_HUMAN Importin-5 OS=Homo sapiens OX=9606 GN=IPO5 PE=1 SV=4	5.75758
O00410_K961	IPO5	VIQSADSK*TK	IPO5_HUMAN Importin-5 OS=Homo sapiens OX=9606 GN=IPO5 PE=1 SV=4	10
O00560_K109	SDCBP	AEIK*QGIR	SDCB1_HUMAN Syntenin-1 OS=Homo sapiens OX=9606 GN=SDCBP PE=1 SV=1	0.8308
O00571_K118	DDX3X	SGFGK*FER	DDX3X_HUMAN ATP-dependent RNA helicase DDX3X OS=Homo sapiens OX=9606 GN=DDX3X PE=1 SV=3	5.39622	Modified residue	Note=N6-acetyllysine;Ontology_term=ECO:0007744;evidence=ECO:0007744|PubMed:19608861;Dbxref=PMID:19608861
O00571_K255	DDX3X	AMK*ENGR	DDX3X_HUMAN ATP-dependent RNA helicase DDX3X OS=Homo sapiens OX=9606 GN=DDX3X PE=1 SV=3	9.64286
O00592_K385	PODXL	AVK*ATFNPAQDK	PODXL_HUMAN Podocalyxin OS=Homo sapiens OX=9606 GN=PODXL PE=1 SV=2	10
O00592_K429	PODXL	LK*DKWDELK	PODXL_HUMAN Podocalyxin OS=Homo sapiens OX=9606 GN=PODXL PE=1 SV=2	1.17647
O00592_K431	PODXL	LKDK*WDELK	PODXL_HUMAN Podocalyxin OS=Homo sapiens OX=9606 GN=PODXL PE=1 SV=2	5.68713
O00622_K262	CCN1	LVK*ETR	CCN1_HUMAN CCN family member 1 OS=Homo sapiens OX=9606 GN=CCN1 PE=1 SV=1	0.88496
O00762_K33	UBE2C	GPVGK*R	UBE2C_HUMAN Ubiquitin-conjugating enzyme E2 C OS=Homo sapiens OX=9606 GN=UBE2C PE=1 SV=1	10
O00764_K161	PDXK	K*IHSQEEALR	PDXK_HUMAN Pyridoxal kinase OS=Homo sapiens OX=9606 GN=PDXK PE=1 SV=1	4.22933
O14529_K376	CUX2	AMK*LASSTCSLPQGMAK	CUX2_HUMAN Homeobox protein cut-like 2 OS=Homo sapiens OX=9606 GN=CUX2 PE=1 SV=4	5
O14579_K278	COPE	YLSQLK*DAHR	COPE_HUMAN Coatomer subunit epsilon OS=Homo sapiens OX=9606 GN=COPE PE=1 SV=3	9.81481
O14737_K20	PDCD5	LAELQAK*HGDPGDAAQQEAK	PDCD5_HUMAN Programmed cell death protein 5 OS=Homo sapiens OX=9606 GN=PDCD5 PE=1 SV=3	10
O14737_K33	PDCD5	HGDPGDAAQQEAK*HR	PDCD5_HUMAN Programmed cell death protein 5 OS=Homo sapiens OX=9606 GN=PDCD5 PE=1 SV=3	10
O14737_K98	PDCD5	K*VSQQTEK	PDCD5_HUMAN Programmed cell death protein 5 OS=Homo sapiens OX=9606 GN=PDCD5 PE=1 SV=3	6.94475
O14787_K56	TNPO2	LK*SEDEPTR	TNPO2_HUMAN Transportin-2 OS=Homo sapiens OX=9606 GN=TNPO2 PE=1 SV=3	1.51515
O14787_K817	TNPO2	DNEEK*DSAFR	TNPO2_HUMAN Transportin-2 OS=Homo sapiens OX=9606 GN=TNPO2 PE=1 SV=3	10
O14879_K119	IFIT3	LSDAQIYVDK*VK	IFIT3_HUMAN Interferon-induced protein with tetratricopeptide repeats 3 OS=Homo sapiens OX=9606 GN=IFIT3 PE=1 SV=1	10
O14879_K369	IFIT3	YCNLQK*YNGK	IFIT3_HUMAN Interferon-induced protein with tetratricopeptide repeats 3 OS=Homo sapiens OX=9606 GN=IFIT3 PE=1 SV=1	7.69231
O14880_K149	MGST3	SGLGSGPK*CCH	MGST3_HUMAN Microsomal glutathione S-transferase 3 OS=Homo sapiens OX=9606 GN=MGST3 PE=1 SV=1	10
O14929_K15	HAT1	FLVEYK*SAVEK	HAT1_HUMAN Histone acetyltransferase type B catalytic subunit OS=Homo sapiens OX=9606 GN=HAT1 PE=1 SV=1	7.14286	Modified residue	Note=N6-acetyllysine;Ontology_term=ECO:0000250;evidence=ECO:0000250|UniProtKB:Q8BY71
O14964_K207	HGS	FGIEK*EVR	HGS_HUMAN Hepatocyte growth factor-regulated tyrosine kinase substrate OS=Homo sapiens OX=9606 GN=HGS PE=1 SV=1	10	Modified residue	Note=N6-acetyllysine;Ontology_term=ECO:0007744;evidence=ECO:0007744|PubMed:19608861;Dbxref=PMID:19608861
O14980_K103	XPO1	NQCEGIK*K	XPO1_HUMAN Exportin-1 OS=Homo sapiens OX=9606 GN=XPO1 PE=1 SV=1	2.66667
O14980_K531	XPO1	DLLGLCEQK*R	XPO1_HUMAN Exportin-1 OS=Homo sapiens OX=9606 GN=XPO1 PE=1 SV=1	3.93364
O14980_K680	XPO1	NVDILK*DPETVK	XPO1_HUMAN Exportin-1 OS=Homo sapiens OX=9606 GN=XPO1 PE=1 SV=1	8.26798
O14980_K693	XPO1	QLGSILK*TNVR	XPO1_HUMAN Exportin-1 OS=Homo sapiens OX=9606 GN=XPO1 PE=1 SV=1	10	Modified residue	Note=N6-acetyllysine;Ontology_term=ECO:0007744;evidence=ECO:0007744|PubMed:19608861;Dbxref=PMID:19608861
O15031_K1429	PLXNB2	AIK*HQVEK	PLXB2_HUMAN Plexin-B2 OS=Homo sapiens OX=9606 GN=PLXNB2 PE=1 SV=3	5.55556
O15145_K123	ARPC3	PANK*QEDEVMR	ARPC3_HUMAN Actin-related protein 2/3 complex subunit 3 OS=Homo sapiens OX=9606 GN=ARPC3 PE=1 SV=3	10
O15173_K193	PGRMC2	EK*YDYVGR	PGRC2_HUMAN Membrane-associated progesterone receptor component 2 OS=Homo sapiens OX=9606 GN=PGRMC2 PE=1 SV=1	7.56016
O15228_K643	GNPAT	LGVVEK*K	GNPAT_HUMAN Dihydroxyacetone phosphate acyltransferase OS=Homo sapiens OX=9606 GN=GNPAT PE=1 SV=1	6.6437	Modified residue	Note=N6-acetyllysine;Ontology_term=ECO:0007744;evidence=ECO:0007744|PubMed:19608861;Dbxref=PMID:19608861
O15260_K139	SURF4	SEGK*SMFAGVPTMR	SURF4_HUMAN Surfeit locus protein 4 OS=Homo sapiens OX=9606 GN=SURF4 PE=1 SV=3	10
O15260_K22	SURF4	VTK*QYLPHVAR	SURF4_HUMAN Surfeit locus protein 4 OS=Homo sapiens OX=9606 GN=SURF4 PE=1 SV=3	10
O15294_K991	OGT	LGTDLEYLK*K	OGT1_HUMAN UDP-N-acetylglucosamine--peptide N-acetylglucosaminyltransferase 110 kDa subunit OS=Homo sapiens OX=9606 GN=OGT PE=1 SV=3	5.88235
O15296_K175	ALOX15B	TVEDLELNIK*	LX15B_HUMAN Polyunsaturated fatty acid lipoxygenase ALOX15B OS=Homo sapiens OX=9606 GN=ALOX15B PE=1 SV=3	5.55556
O15355_K166	PPM1G	YGQNCHK*GPPHSK	PPM1G_HUMAN Protein phosphatase 1G OS=Homo sapiens OX=9606 GN=PPM1G PE=1 SV=1	10
O15371_K275	EIF3D	VGSK*LFFDK	EIF3D_HUMAN Eukaryotic translation initiation factor 3 subunit D OS=Homo sapiens OX=9606 GN=EIF3D PE=1 SV=1	6.66667
O15372_K269	EIF3H	NTSK*QQQQK	EIF3H_HUMAN Eukaryotic translation initiation factor 3 subunit H OS=Homo sapiens OX=9606 GN=EIF3H PE=1 SV=1	1.17647
O15400_K55	STX7	QQLQQK*QQYTNQLAK	STX7_HUMAN Syntaxin-7 OS=Homo sapiens OX=9606 GN=STX7 PE=1 SV=4	10
O15431_K96	SLC31A1	K*SQVSIR	COPT1_HUMAN High affinity copper uptake protein 1 OS=Homo sapiens OX=9606 GN=SLC31A1 PE=1 SV=1	10
O43143_K143	DHX15	LQLPVWEYK*DR	DHX15_HUMAN Pre-mRNA-splicing factor ATP-dependent RNA helicase DHX15 OS=Homo sapiens OX=9606 GN=DHX15 PE=1 SV=2	6.66667
O43143_K786	DHX15	IIAK*LQSK	DHX15_HUMAN Pre-mRNA-splicing factor ATP-dependent RNA helicase DHX15 OS=Homo sapiens OX=9606 GN=DHX15 PE=1 SV=2	10	Cross-link	Note=Glycyl lysine isopeptide (Lys-Gly) (interchain with G-Cter in SUMO2);Ontology_term=ECO:0007744;evidence=ECO:0007744|PubMed:28112733;Dbxref=PMID:28112733
O43242_K315	PSMD3	K*APQHTAVGFK	PSMD3_HUMAN 26S proteasome non-ATPase regulatory subunit 3 OS=Homo sapiens OX=9606 GN=PSMD3 PE=1 SV=2	10
O43242_K76	PSMD3	ELDTVTLEDIK*EHVK	PSMD3_HUMAN 26S proteasome non-ATPase regulatory subunit 3 OS=Homo sapiens OX=9606 GN=PSMD3 PE=1 SV=2	1.02041
O43264_K597	ZW10	AQK*GELLER	ZW10_HUMAN Centromere/kinetochore protein zw10 homolog OS=Homo sapiens OX=9606 GN=ZW10 PE=1 SV=3	9.58333
O43291_K170	SPINT2	GNK*NSYR	SPIT2_HUMAN Kunitz-type protease inhibitor 2 OS=Homo sapiens OX=9606 GN=SPINT2 PE=1 SV=2	10	Disulfide bond	Ontology_term=ECO:0000255;evidence=ECO:0000255|PROSITE-ProRule:PRU00031
O43324_K57	EEF1E1	QANK*EYLLGSTAEEK	MCA3_HUMAN Eukaryotic translation elongation factor 1 epsilon-1 OS=Homo sapiens OX=9606 GN=EEF1E1 PE=1 SV=1	10
O43390_K114	HNRNPR	QGSK*VQESTK	HNRPR_HUMAN Heterogeneous nuclear ribonucleoprotein R OS=Homo sapiens OX=9606 GN=HNRNPR PE=1 SV=1	10
O43399_K128	TPD52L2	K*TQETLSQAGQK	TPD54_HUMAN Tumor protein D54 OS=Homo sapiens OX=9606 GN=TPD52L2 PE=1 SV=2	10
O43399_K175	TPD52L2	VGTIK*SK	TPD54_HUMAN Tumor protein D54 OS=Homo sapiens OX=9606 GN=TPD52L2 PE=1 SV=2	9.02778
O43399_K70	TPD52L2	QVLAAK*ER	TPD54_HUMAN Tumor protein D54 OS=Homo sapiens OX=9606 GN=TPD52L2 PE=1 SV=2	10
O43592_K172	XPOT	NTLIK*DTMR	XPOT_HUMAN Exportin-T OS=Homo sapiens OX=9606 GN=XPOT PE=1 SV=2	5.55556
O43615_K121	TIMM44	K*LGELTGTVK	TIM44_HUMAN Mitochondrial import inner membrane translocase subunit TIM44 OS=Homo sapiens OX=9606 GN=TIMM44 PE=1 SV=2	10
O43615_K130	TIMM44	LGELTGTVK*ESLHEVSK	TIM44_HUMAN Mitochondrial import inner membrane translocase subunit TIM44 OS=Homo sapiens OX=9606 GN=TIMM44 PE=1 SV=2	5.26316
O43707_K108	ACTN4	VHK*INNVNK	ACTN4_HUMAN Alpha-actinin-4 OS=Homo sapiens OX=9606 GN=ACTN4 PE=1 SV=2	0.36997
O43707_K437	ACTN4	EAMLK*HR	ACTN4_HUMAN Alpha-actinin-4 OS=Homo sapiens OX=9606 GN=ACTN4 PE=1 SV=2	8.33333
O43707_K518	ACTN4	EALEK*TEK	ACTN4_HUMAN Alpha-actinin-4 OS=Homo sapiens OX=9606 GN=ACTN4 PE=1 SV=2	10
O43707_K592	ACTN4	EAILAIHK*EAQR	ACTN4_HUMAN Alpha-actinin-4 OS=Homo sapiens OX=9606 GN=ACTN4 PE=1 SV=2	10	Modified residue	Note=N6-acetyllysine;Ontology_term=ECO:0007744;evidence=ECO:0007744|PubMed:19608861;Dbxref=PMID:19608861
O43707_K632	ACTN4	VQQLVPK*R	ACTN4_HUMAN Alpha-actinin-4 OS=Homo sapiens OX=9606 GN=ACTN4 PE=1 SV=2	10
O43707_K98	ACTN4	LPK*PER	ACTN4_HUMAN Alpha-actinin-4 OS=Homo sapiens OX=9606 GN=ACTN4 PE=1 SV=2	10
O43865_K57	AHCYL1	FPTK*TGR	SAHH2_HUMAN S-adenosylhomocysteine hydrolase-like protein 1 OS=Homo sapiens OX=9606 GN=AHCYL1 PE=1 SV=2	10
O60264_K176	SMARCA5	FEDSPSYVK*WGK	SMCA5_HUMAN SWI/SNF-related matrix-associated actin-dependent regulator of chromatin subfamily A member 5 OS=Homo sapiens OX=9606 GN=SMARCA5 PE=1 SV=1	0.68493
O60313_K228	OPA1	IDQLQEELLHTQLK*YQR	OPA1_HUMAN Dynamin-like 120 kDa protein, mitochondrial OS=Homo sapiens OX=9606 GN=OPA1 PE=1 SV=3	8.11688	Modified residue	Note=N6-acetyllysine;Ontology_term=ECO:0007744;evidence=ECO:0007744|PubMed:19608861;Dbxref=PMID:19608861
O60313_K792	OPA1	TQEQCVHNETK*NELEK	OPA1_HUMAN Dynamin-like 120 kDa protein, mitochondrial OS=Homo sapiens OX=9606 GN=OPA1 PE=1 SV=3	10
O60343_K1291	TBC1D4	DLNCNPNNK*AK	TBCD4_HUMAN TBC1 domain family member 4 OS=Homo sapiens OX=9606 GN=TBC1D4 PE=1 SV=2	5.26316
O60488_K498	ACSL4	VGAPLICCEIK*LK	ACSL4_HUMAN Long-chain-fatty-acid--CoA ligase 4 OS=Homo sapiens OX=9606 GN=ACSL4 PE=1 SV=2	7.14286
O60488_K89	ACSL4	LFDHAVSK*FGK	ACSL4_HUMAN Long-chain-fatty-acid--CoA ligase 4 OS=Homo sapiens OX=9606 GN=ACSL4 PE=1 SV=2	7.19975
O60610_K1046	DIAPH1	FPDELAHVEK*ASR	DIAP1_HUMAN Protein diaphanous homolog 1 OS=Homo sapiens OX=9606 GN=DIAPH1 PE=1 SV=2	1.03093
O60664_K257	PLIN3	QHAYEHSLGK*LR	PLIN3_HUMAN Perilipin-3 OS=Homo sapiens OX=9606 GN=PLIN3 PE=1 SV=3	10
O60664_K289	PLIN3	QGVDQK*LVEGQEK	PLIN3_HUMAN Perilipin-3 OS=Homo sapiens OX=9606 GN=PLIN3 PE=1 SV=3	10
O60664_K65	PLIN3	TVCDAAEK*GVR	PLIN3_HUMAN Perilipin-3 OS=Homo sapiens OX=9606 GN=PLIN3 PE=1 SV=3	9.7619	Modified residue	Note=N6-acetyllysine;Ontology_term=ECO:0007744;evidence=ECO:0007744|PubMed:19608861;Dbxref=PMID:19608861
O60716_K622	CTNND1	YQEAAPNVANNTGPHAASCFGAK*K	CTND1_HUMAN Catenin delta-1 OS=Homo sapiens OX=9606 GN=CTNND1 PE=1 SV=1	10
O60749_K223	SNX2	VGK*EDSSSTEFVEK	SNX2_HUMAN Sorting nexin-2 OS=Homo sapiens OX=9606 GN=SNX2 PE=1 SV=2	5.88235
O60841_K921	EIF5B	NQYEK*HK	IF2P_HUMAN Eukaryotic translation initiation factor 5B OS=Homo sapiens OX=9606 GN=EIF5B PE=1 SV=4	3.38753
O75083_K223	WDR1	TGEK*VCALGGSK	WDR1_HUMAN WD repeat-containing protein 1 OS=Homo sapiens OX=9606 GN=WDR1 PE=1 SV=4	10
O75083_K569	WDR1	VK*IQDAHR	WDR1_HUMAN WD repeat-containing protein 1 OS=Homo sapiens OX=9606 GN=WDR1 PE=1 SV=4	7.53205
O75083_K6	WDR1	PYEIK*K	WDR1_HUMAN WD repeat-containing protein 1 OS=Homo sapiens OX=9606 GN=WDR1 PE=1 SV=4	10
O75083_K90	WDR1	IWDTTQK*EHLLK	WDR1_HUMAN WD repeat-containing protein 1 OS=Homo sapiens OX=9606 GN=WDR1 PE=1 SV=4	6.66667
O75131_K533	CPNE3	NPATK*QQK	CPNE3_HUMAN Copine-3 OS=Homo sapiens OX=9606 GN=CPNE3 PE=1 SV=1	5.10592
O75190_K20	DNAJB6	HASPEDIK*K	DNJB6_HUMAN DnaJ homolog subfamily B member 6 OS=Homo sapiens OX=9606 GN=DNAJB6 PE=1 SV=2	6.07143
O75347_K52	TBCA	K*QAEILQESR	TBCA_HUMAN Tubulin-specific chaperone A OS=Homo sapiens OX=9606 GN=TBCA PE=1 SV=3	6.62393
O75369_K1005	FLNB	ENSTAK*FIPR	FLNB_HUMAN Filamin-B OS=Homo sapiens OX=9606 GN=FLNB PE=1 SV=2	0.79365
O75369_K1221	FLNB	VK*VEPAVDTSR	FLNB_HUMAN Filamin-B OS=Homo sapiens OX=9606 GN=FLNB PE=1 SV=2	6.28291
O75369_K1757	FLNB	K*GEITGEVHMPSGK	FLNB_HUMAN Filamin-B OS=Homo sapiens OX=9606 GN=FLNB PE=1 SV=2	6.90171
O75369_K1979	FLNB	EVGEHLVSIK*K	FLNB_HUMAN Filamin-B OS=Homo sapiens OX=9606 GN=FLNB PE=1 SV=2	6.25
O75369_K2088	FLNB	FADEHVPGSPFTVK*ISGEGR	FLNB_HUMAN Filamin-B OS=Homo sapiens OX=9606 GN=FLNB PE=1 SV=2	5.26316
O75369_K2195	FLNB	GQHVTGSPFQFTVGPLGEGGAHK*VR	FLNB_HUMAN Filamin-B OS=Homo sapiens OX=9606 GN=FLNB PE=1 SV=2	6.80556
O75369_K2507	FLNB	SSTETCYSAIPK*ASSDASK	FLNB_HUMAN Filamin-B OS=Homo sapiens OX=9606 GN=FLNB PE=1 SV=2	10
O75369_K2514	FLNB	ASSDASK*VTSK	FLNB_HUMAN Filamin-B OS=Homo sapiens OX=9606 GN=FLNB PE=1 SV=2	0.91743
O75369_K476	FLNB	ETTDFK*VDTK	FLNB_HUMAN Filamin-B OS=Homo sapiens OX=9606 GN=FLNB PE=1 SV=2	6.18653
O75369_K502	FLNB	GLEELVK*QK	FLNB_HUMAN Filamin-B OS=Homo sapiens OX=9606 GN=FLNB PE=1 SV=2	0.985343
O75369_K551	FLNB	SPFEVQVGPEAGMQK*VR	FLNB_HUMAN Filamin-B OS=Homo sapiens OX=9606 GN=FLNB PE=1 SV=2	5.40936
O75369_K681	FLNB	APLK*IFAQDGEGQR	FLNB_HUMAN Filamin-B OS=Homo sapiens OX=9606 GN=FLNB PE=1 SV=2	7.4537	Modified residue	Note=N6-acetyllysine;Ontology_term=ECO:0007744;evidence=ECO:0007744|PubMed:19608861;Dbxref=PMID:19608861
O75369_K697	FLNB	IDIQMK*NR	FLNB_HUMAN Filamin-B OS=Homo sapiens OX=9606 GN=FLNB PE=1 SV=2	7.69231
O75369_K744	FLNB	VNIGQGSHPQK*VK	FLNB_HUMAN Filamin-B OS=Homo sapiens OX=9606 GN=FLNB PE=1 SV=2	5.88235
O75369_K849	FLNB	VK*AEGPGLSK	FLNB_HUMAN Filamin-B OS=Homo sapiens OX=9606 GN=FLNB PE=1 SV=2	10
O75369_K877	FLNB	GAGK*APLNVQFNSPLPGDAVK	FLNB_HUMAN Filamin-B OS=Homo sapiens OX=9606 GN=FLNB PE=1 SV=2	6.66667
O75396_K169	SEC22B	GEALSALDSK*ANNLSSLSK	SC22B_HUMAN Vesicle-trafficking protein SEC22b OS=Homo sapiens OX=9606 GN=SEC22B PE=1 SV=4	1.44928
O75396_K38	SEC22B	DLQQYQSQAK*QLFR	SC22B_HUMAN Vesicle-trafficking protein SEC22b OS=Homo sapiens OX=9606 GN=SEC22B PE=1 SV=4	5.27778	Modified residue	Note=N6-acetyllysine;Ontology_term=ECO:0007744;evidence=ECO:0007744|PubMed:19608861;Dbxref=PMID:19608861
O75396_K43	SEC22B	K*LNEQSPTR	SC22B_HUMAN Vesicle-trafficking protein SEC22b OS=Homo sapiens OX=9606 GN=SEC22B PE=1 SV=4	6.25444
O75410_K740	TACC1	IHAEEK*LDK	TACC1_HUMAN Transforming acidic coiled-coil-containing protein 1 OS=Homo sapiens OX=9606 GN=TACC1 PE=1 SV=2	10
O75477_K192	ERLIN1	NFELMEAEK*TK	ERLN1_HUMAN Erlin-1 OS=Homo sapiens OX=9606 GN=ERLIN1 PE=1 SV=2	10
O75477_K269	ERLIN1	ADAEYYAAHK*YATSNK	ERLN1_HUMAN Erlin-1 OS=Homo sapiens OX=9606 GN=ERLIN1 PE=1 SV=2	7.90616	Modified residue	Note=N6-acetyllysine;Ontology_term=ECO:0007744;evidence=ECO:0007744|PubMed:19608861;Dbxref=PMID:19608861
O75534_K743	CSDE1	VCEGPK*AVAAPRPDR	CSDE1_HUMAN Cold shock domain-containing protein E1 OS=Homo sapiens OX=9606 GN=CSDE1 PE=1 SV=2	7.69231
O75643_K285	SNRNP200	K*ADEVLEILK	U520_HUMAN U5 small nuclear ribonucleoprotein 200 kDa helicase OS=Homo sapiens OX=9606 GN=SNRNP200 PE=1 SV=2	7.69231
O75694_K766	NUP155	K*FHEAQLSEK	NU155_HUMAN Nuclear pore complex protein Nup155 OS=Homo sapiens OX=9606 GN=NUP155 PE=1 SV=1	7.01058
O75822_K210	EIF3J	ITNSLTVLCSEK*QK	EIF3J_HUMAN Eukaryotic translation initiation factor 3 subunit J OS=Homo sapiens OX=9606 GN=EIF3J PE=1 SV=2	7.69231
O75947_K73	ATP5PD	K*FNALK	ATP5H_HUMAN ATP synthase subunit d, mitochondrial OS=Homo sapiens OX=9606 GN=ATP5PD PE=1 SV=3	10
O76003_K110	GLRX3	LDGAHAPELTK*K	GLRX3_HUMAN Glutaredoxin-3 OS=Homo sapiens OX=9606 GN=GLRX3 PE=1 SV=2	10
O76003_K234	GLRX3	APK*LEER	GLRX3_HUMAN Glutaredoxin-3 OS=Homo sapiens OX=9606 GN=GLRX3 PE=1 SV=2	1.49254
O94776_K152	MTA2	VGCK*YQAEIPDR	MTA2_HUMAN Metastasis-associated protein MTA2 OS=Homo sapiens OX=9606 GN=MTA2 PE=1 SV=1	10	Modified residue	Note=N6-acetyllysine;Ontology_term=ECO:0007744;evidence=ECO:0007744|PubMed:19608861;Dbxref=PMID:19608861
O94804_K955	STK10	LSEEAECPNPSTPSK*AAK	STK10_HUMAN Serine/threonine-protein kinase 10 OS=Homo sapiens OX=9606 GN=STK10 PE=1 SV=1	10
O94906_K768	PRPF6	AILEK*SR	PRP6_HUMAN Pre-mRNA-processing factor 6 OS=Homo sapiens OX=9606 GN=PRPF6 PE=1 SV=1	1.47059
O94972_K149	TRIM37	VNEEVAK*LR	TRI37_HUMAN E3 ubiquitin-protein ligase TRIM37 OS=Homo sapiens OX=9606 GN=TRIM37 PE=1 SV=2	10
O94979_K801	SEC31A	AQGEPVAGHESPK*IPYEK	SC31A_HUMAN Protein transport protein Sec31A OS=Homo sapiens OX=9606 GN=SEC31A PE=1 SV=3	6.34921
O95159_K234	ZFPL1	TPGLHGDCDDDK*YR	ZFPL1_HUMAN Zinc finger protein-like 1 OS=Homo sapiens OX=9606 GN=ZFPL1 PE=1 SV=2	7.48737
O95197_K1013	RTN3	DQTK*SIVEK	RTN3_HUMAN Reticulon-3 OS=Homo sapiens OX=9606 GN=RTN3 PE=1 SV=2	8.33333
O95197_K1018	RTN3	SIVEK*IQAK	RTN3_HUMAN Reticulon-3 OS=Homo sapiens OX=9606 GN=RTN3 PE=1 SV=2	10
O95197_K1022	RTN3	IQAK*LPGIAK	RTN3_HUMAN Reticulon-3 OS=Homo sapiens OX=9606 GN=RTN3 PE=1 SV=2	10
O95197_K1028	RTN3	LPGIAK*K	RTN3_HUMAN Reticulon-3 OS=Homo sapiens OX=9606 GN=RTN3 PE=1 SV=2	10
O95197_K905	RTN3	SVIQAVQK*SEEGHPFK	RTN3_HUMAN Reticulon-3 OS=Homo sapiens OX=9606 GN=RTN3 PE=1 SV=2	10
O95218_K59	ZRANB2	TLAEK*SR	ZRAB2_HUMAN Zinc finger Ran-binding domain-containing protein 2 OS=Homo sapiens OX=9606 GN=ZRANB2 PE=1 SV=2	10
O95292_K118	VAPB	EAKPEDLMDSK*LR	VAPB_HUMAN Vesicle-associated membrane protein-associated protein B/C OS=Homo sapiens OX=9606 GN=VAPB PE=1 SV=3	10
O95347_K322	SMC2	K*NLACEESK	SMC2_HUMAN Structural maintenance of chromosomes protein 2 OS=Homo sapiens OX=9606 GN=SMC2 PE=1 SV=2	0.71942
O95347_K330	SMC2	NLACEESK*R	SMC2_HUMAN Structural maintenance of chromosomes protein 2 OS=Homo sapiens OX=9606 GN=SMC2 PE=1 SV=2	7.11219
O95373_K1009	IPO7	AAHESK*MIEK	IPO7_HUMAN Importin-7 OS=Homo sapiens OX=9606 GN=IPO7 PE=1 SV=1	5.88833
O95373_K312	IPO7	VLYQYK*EK	IPO7_HUMAN Importin-7 OS=Homo sapiens OX=9606 GN=IPO7 PE=1 SV=1	9.2217
O95373_K774	IPO7	EVK*TSELR	IPO7_HUMAN Importin-7 OS=Homo sapiens OX=9606 GN=IPO7 PE=1 SV=1	1.96078
O95433_K203	AHSA1	PVGVK*IPTCK	AHSA1_HUMAN Activator of 90 kDa heat shock protein ATPase homolog 1 OS=Homo sapiens OX=9606 GN=AHSA1 PE=1 SV=1	8.05556	Cross-link	Note=Glycyl lysine isopeptide (Lys-Gly) (interchain with G-Cter in SUMO2);Ontology_term=ECO:0007744;evidence=ECO:0007744|PubMed:28112733;Dbxref=PMID:28112733
O95470_K353	SGPL1	GVTSISADTHK*YGYAPK	SGPL1_HUMAN Sphingosine-1-phosphate lyase 1 OS=Homo sapiens OX=9606 GN=SGPL1 PE=1 SV=3	5.96874	Modified residue	Note=N6-(pyridoxal phosphate)lysine%3B alternate
O95502_K251	NPTXR	LALEK*ER	NPTXR_HUMAN Neuronal pentraxin receptor OS=Homo sapiens OX=9606 GN=NPTXR PE=3 SV=2	10
O95670_K16	ATP6V1G2	LQAEK*R	VATG2_HUMAN V-type proton ATPase subunit G 2 OS=Homo sapiens OX=9606 GN=ATP6V1G2 PE=1 SV=1	7.14286
O95757_K53	HSPA4L	AIGNAAK*SQIVTNVR	HS74L_HUMAN Heat shock 70 kDa protein 4L OS=Homo sapiens OX=9606 GN=HSPA4L PE=1 SV=3	6.66667
O95786_K177	DDX58	LALEK*ER	DDX58_HUMAN Antiviral innate immune response receptor RIG-I OS=Homo sapiens OX=9606 GN=DDX58 PE=1 SV=2	8.84615
O95816_K111	BAG2	NPQQQESLK*HATR	BAG2_HUMAN BAG family molecular chaperone regulator 2 OS=Homo sapiens OX=9606 GN=BAG2 PE=1 SV=1	10
O95816_K195	BAG2	LLEHSK*GAGSK	BAG2_HUMAN BAG family molecular chaperone regulator 2 OS=Homo sapiens OX=9606 GN=BAG2 PE=1 SV=1	7.14286
O95816_K200	BAG2	GAGSK*TLQQNAESR	BAG2_HUMAN BAG family molecular chaperone regulator 2 OS=Homo sapiens OX=9606 GN=BAG2 PE=1 SV=1	0.90909
O95816_K9	BAG2	INAK*ANEGR	BAG2_HUMAN BAG family molecular chaperone regulator 2 OS=Homo sapiens OX=9606 GN=BAG2 PE=1 SV=1	5.26316
O96019_K371	ACTL6A	ELSQK*TPPSMR	ACL6A_HUMAN Actin-like protein 6A OS=Homo sapiens OX=9606 GN=ACTL6A PE=1 SV=1	10
P00338_K155	LDHA	ISGFPK*NR	LDHA_HUMAN L-lactate dehydrogenase A chain OS=Homo sapiens OX=9606 GN=LDHA PE=1 SV=2	7.9834
P00338_K222	LDHA	TLHPDLGTDK*DK	LDHA_HUMAN L-lactate dehydrogenase A chain OS=Homo sapiens OX=9606 GN=LDHA PE=1 SV=2	1.42857
P00338_K228	LDHA	EQWK*EVHK DKEQWK*EVHK	LDHA_HUMAN L-lactate dehydrogenase A chain OS=Homo sapiens OX=9606 GN=LDHA PE=1 SV=2	5.58139
P00338_K243	LDHA	QVVESAYEVIK*LK	LDHA_HUMAN L-lactate dehydrogenase A chain OS=Homo sapiens OX=9606 GN=LDHA PE=1 SV=2	6.66667	Modified residue	Note=N6-acetyllysine;Ontology_term=ECO:0000250;evidence=ECO:0000250|UniProtKB:P06151
P00338_K318	LDHA	K*SADTLWGIQK	LDHA_HUMAN L-lactate dehydrogenase A chain OS=Homo sapiens OX=9606 GN=LDHA PE=1 SV=2	9.58333	Modified residue	Note=N6-acetyllysine%3B alternate;Ontology_term=ECO:0007744;evidence=ECO:0007744|PubMed:19608861;Dbxref=PMID:19608861
P00338_K76	LDHA	TPK*IVSGK	LDHA_HUMAN L-lactate dehydrogenase A chain OS=Homo sapiens OX=9606 GN=LDHA PE=1 SV=2	8.05068
P00338_K81	LDHA	IVSGK*DYNVTANSK	LDHA_HUMAN L-lactate dehydrogenase A chain OS=Homo sapiens OX=9606 GN=LDHA PE=1 SV=2	10	Modified residue	Note=N6-acetyllysine;Ontology_term=ECO:0007744;evidence=ECO:0007744|PubMed:19608861;Dbxref=PMID:19608861
P00367_K480	GLUD1	FGK*HGGTIPIVPTAEFQDR	DHE3_HUMAN Glutamate dehydrogenase 1, mitochondrial OS=Homo sapiens OX=9606 GN=GLUD1 PE=1 SV=2	1.08696	Modified residue	Note=N6-acetyllysine%3B alternate;Ontology_term=ECO:0007744;evidence=ECO:0007744|PubMed:19608861;Dbxref=PMID:19608861
P00492_K103	HPRT1	LK*SYCNDQSTGDIK	HPRT_HUMAN Hypoxanthine-guanine phosphoribosyltransferase OS=Homo sapiens OX=9606 GN=HPRT1 PE=1 SV=2	10	Modified residue	Note=N6-acetyllysine;Ontology_term=ECO:0000250;evidence=ECO:0000250|UniProtKB:P00493
P00558_K11	PGK1	LTLDK*LDVK	PGK1_HUMAN Phosphoglycerate kinase 1 OS=Homo sapiens OX=9606 GN=PGK1 PE=1 SV=3	10	Modified residue	Note=N6-acetyllysine;Ontology_term=ECO:0007744;evidence=ECO:0007744|PubMed:19608861;Dbxref=PMID:19608861
P00558_K131	PGK1	FHVEEEGK*GK	PGK1_HUMAN Phosphoglycerate kinase 1 OS=Homo sapiens OX=9606 GN=PGK1 PE=1 SV=3	10	Modified residue	Note=N6-acetyllysine%3B alternate;Ontology_term=ECO:0007744;evidence=ECO:0007744|PubMed:19608861;Dbxref=PMID:19608861
P00558_K133	PGK1	GK*DASGNK	PGK1_HUMAN Phosphoglycerate kinase 1 OS=Homo sapiens OX=9606 GN=PGK1 PE=1 SV=3	1.6589
P00558_K139	PGK1	DASGNK*VK	PGK1_HUMAN Phosphoglycerate kinase 1 OS=Homo sapiens OX=9606 GN=PGK1 PE=1 SV=3	8.7645
P00558_K141	PGK1	VK*AEPAK	PGK1_HUMAN Phosphoglycerate kinase 1 OS=Homo sapiens OX=9606 GN=PGK1 PE=1 SV=3	7.42333
P00558_K146	PGK1	AEPAK*IEAFR	PGK1_HUMAN Phosphoglycerate kinase 1 OS=Homo sapiens OX=9606 GN=PGK1 PE=1 SV=3	10	Modified residue	Note=N6-acetyllysine;Ontology_term=ECO:0007744;evidence=ECO:0007744|PubMed:19608861;Dbxref=PMID:19608861
P00558_K191	PGK1	AGGFLMK*K	PGK1_HUMAN Phosphoglycerate kinase 1 OS=Homo sapiens OX=9606 GN=PGK1 PE=1 SV=3	6.68651	Modified residue	Note=N6-succinyllysine;Ontology_term=ECO:0000250;evidence=ECO:0000250|UniProtKB:P09411
P00558_K192	PGK1	K*ELNYFAK	PGK1_HUMAN Phosphoglycerate kinase 1 OS=Homo sapiens OX=9606 GN=PGK1 PE=1 SV=3	3.62247
P00558_K267	PGK1	IVK*DLMSK	PGK1_HUMAN Phosphoglycerate kinase 1 OS=Homo sapiens OX=9606 GN=PGK1 PE=1 SV=3	10	Modified residue	Note=N6-acetyllysine;Ontology_term=ECO:0007744;evidence=ECO:0007744|PubMed:19608861;Dbxref=PMID:19608861
P00558_K272	PGK1	DLMSK*AEK	PGK1_HUMAN Phosphoglycerate kinase 1 OS=Homo sapiens OX=9606 GN=PGK1 PE=1 SV=3	5
P00558_K323	PGK1	K*YAEAVTR	PGK1_HUMAN Phosphoglycerate kinase 1 OS=Homo sapiens OX=9606 GN=PGK1 PE=1 SV=3	0.97087	Modified residue	Note=N6-(2-hydroxyisobutyryl)lysine;Ontology_term=ECO:0000269;evidence=ECO:0000269|PubMed:29775581;Dbxref=PMID:29775581
P00558_K353	PGK1	GTK*ALMDEVVK	PGK1_HUMAN Phosphoglycerate kinase 1 OS=Homo sapiens OX=9606 GN=PGK1 PE=1 SV=3	10
P00558_K41	PGK1	IK*AAVPSIK	PGK1_HUMAN Phosphoglycerate kinase 1 OS=Homo sapiens OX=9606 GN=PGK1 PE=1 SV=3	1.20482
P00568_K27	AK1	GTQCEK*IVQK	KAD1_HUMAN Adenylate kinase isoenzyme 1 OS=Homo sapiens OX=9606 GN=AK1 PE=1 SV=3	10
P00750_K464	PLAT	LK*EAHVR	TPA_HUMAN Tissue-type plasminogen activator OS=Homo sapiens OX=9606 GN=PLAT PE=1 SV=1	10	Site$Disulfide bond	Note=Important for single-chain activity$Ontology_term=ECO:0000250;evidence=ECO:0000250
P01903_K244	HLA-DRA	K*SNAAER	DRA_HUMAN HLA class II histocompatibility antigen, DR alpha chain OS=Homo sapiens OX=9606 GN=HLA-DRA PE=1 SV=1	4.88095	Cross-link	Note=Glycyl lysine isopeptide (Lys-Gly) (interchain with G-Cter in ubiquitin);Ontology_term=ECO:0000269;evidence=ECO:0000269|PubMed:19117940;Dbxref=PMID:19117940
P02545_K114	LMNA	VREEFK*ELK	LMNA_HUMAN Prelamin-A/C OS=Homo sapiens OX=9606 GN=LMNA PE=1 SV=1	7.04545
P02545_K123	LMNA	K*EGDLIAAQAR	LMNA_HUMAN Prelamin-A/C OS=Homo sapiens OX=9606 GN=LMNA PE=1 SV=1	6.59571	Modified residue	Note=N6-acetyllysine;Ontology_term=ECO:0000250;evidence=ECO:0000250|UniProtKB:P48678
P02545_K155	LMNA	EAALSTALSEK*R	LMNA_HUMAN Prelamin-A/C OS=Homo sapiens OX=9606 GN=LMNA PE=1 SV=1	5	Modified residue	Note=N6-acetyllysine;Ontology_term=ECO:0000250;evidence=ECO:0000250|UniProtKB:P48678
P02545_K171	LMNA	GQVAK*LEAALGEAK	LMNA_HUMAN Prelamin-A/C OS=Homo sapiens OX=9606 GN=LMNA PE=1 SV=1	3.52213	Modified residue$Cross-link	Note=N6-acetyllysine%3B alternate;Ontology_term=ECO:0000250;evidence=ECO:0000250|UniProtKB:P48678$Note=Glycyl lysine isopeptide (Lys-Gly) (interchain with G-Cter in SUMO2)%3B alternate;Ontology_term=ECO:0007744;evidence=ECO:0007744|PubMed:28112733;Dbxref=PMID:28112733
P02545_K180	LMNA	LEAALGEAK*K	LMNA_HUMAN Prelamin-A/C OS=Homo sapiens OX=9606 GN=LMNA PE=1 SV=1	10
P02545_K201	LMNA	LQTMK*EELDFQK	LMNA_HUMAN Prelamin-A/C OS=Homo sapiens OX=9606 GN=LMNA PE=1 SV=1	7.28495	Modified residue$Cross-link	Note=N6-acetyllysine%3B alternate;Ontology_term=ECO:0000250;evidence=ECO:0000250|UniProtKB:P48678$Note=Glycyl lysine isopeptide (Lys-Gly) (interchain with G-Cter in SUMO)%3B alternate
P02545_K233	LMNA	LVEIDNGK*QR LVEIDNGK*	LMNA_HUMAN Prelamin-A/C OS=Homo sapiens OX=9606 GN=LMNA PE=1 SV=1	10	Cross-link	Note=Glycyl lysine isopeptide (Lys-Gly) (interchain with G-Cter in SUMO2);Ontology_term=ECO:0007744,ECO:0007744,ECO:0007744,ECO:0007744;evidence=ECO:0007744|PubMed:25114211,ECO:0007744|PubMed:25218447,ECO:0007744|PubMed:25755297,ECO:0007744|PubMed:28112733;Dbxref=PMID:25114211,PMID:25218447,PMID:25755297,PMID:28112733
P02545_K260	LMNA	AQHEDQVEQYK*K	LMNA_HUMAN Prelamin-A/C OS=Homo sapiens OX=9606 GN=LMNA PE=1 SV=1	10	Modified residue$Cross-link	Note=N6-acetyllysine%3B alternate;Ontology_term=ECO:0000250;evidence=ECO:0000250|UniProtKB:P48678$Note=Glycyl lysine isopeptide (Lys-Gly) (interchain with G-Cter in SUMO2)%3B alternate;Ontology_term=ECO:0007744,ECO:0007744;evidence=ECO:0007744|PubMed:25755297,ECO:0007744|PubMed:28112733;Dbxref=PMID:25755297,PMID:28112733
P02545_K265	LMNA	ELEK*TYSAK	LMNA_HUMAN Prelamin-A/C OS=Homo sapiens OX=9606 GN=LMNA PE=1 SV=1	6.97115
P02545_K270	LMNA	TYSAK*LDNAR	LMNA_HUMAN Prelamin-A/C OS=Homo sapiens OX=9606 GN=LMNA PE=1 SV=1	9.29487	Modified residue$Cross-link	Note=N6-acetyllysine%3B alternate;Ontology_term=ECO:0007744;evidence=ECO:0007744|PubMed:19608861;Dbxref=PMID:19608861$Note=Glycyl lysine isopeptide (Lys-Gly) (interchain with G-Cter in SUMO2)%3B alternate;Ontology_term=ECO:0007744,ECO:0007744;evidence=ECO:0007744|PubMed:25755297,ECO:0007744|PubMed:28112733;Dbxref=PMID:25755297,PMID:28112733
P02545_K316	LMNA	QLAAK*EAK	LMNA_HUMAN Prelamin-A/C OS=Homo sapiens OX=9606 GN=LMNA PE=1 SV=1	3.34596
P02545_K341	LMNA	LLAEK*ER	LMNA_HUMAN Prelamin-A/C OS=Homo sapiens OX=9606 GN=LMNA PE=1 SV=1	10
P02545_K417	LMNA	ASSHSSQTQGGGSVTK*K	LMNA_HUMAN Prelamin-A/C OS=Homo sapiens OX=9606 GN=LMNA PE=1 SV=1	4.37525	Cross-link	Note=Glycyl lysine isopeptide (Lys-Gly) (interchain with G-Cter in SUMO2);Ontology_term=ECO:0007744,ECO:0007744,ECO:0007744;evidence=ECO:0007744|PubMed:25218447,ECO:0007744|PubMed:25755297,ECO:0007744|PubMed:28112733;Dbxref=PMID:25218447,PMID:25755297,PMID:28112733
P02545_K420	LMNA	K*LESTESR	LMNA_HUMAN Prelamin-A/C OS=Homo sapiens OX=9606 GN=LMNA PE=1 SV=1	4.21296	Cross-link	Note=Glycyl lysine isopeptide (Lys-Gly) (interchain with G-Cter in SUMO2);Ontology_term=ECO:0007744,ECO:0007744,ECO:0007744,ECO:0007744;evidence=ECO:0007744|PubMed:25218447,ECO:0007744|PubMed:25755297,ECO:0007744|PubMed:25772364,ECO:0007744|PubMed:28112733;Dbxref=PMID:25218447,PMID:25755297,PMID:25772364,PMID:28112733
P02545_K450	LMNA	VAVEEVDEEGK*FVR	LMNA_HUMAN Prelamin-A/C OS=Homo sapiens OX=9606 GN=LMNA PE=1 SV=1	5.88235	Modified residue$Cross-link	Note=N6-acetyllysine%3B alternate;Ontology_term=ECO:0007744;evidence=ECO:0007744|PubMed:19608861;Dbxref=PMID:19608861$Note=Glycyl lysine isopeptide (Lys-Gly) (interchain with G-Cter in SUMO2)%3B alternate;Ontology_term=ECO:0007744;evidence=ECO:0007744|PubMed:28112733;Dbxref=PMID:28112733
P02545_K457	LMNA	NK*SNEDQSMGNWQIK	LMNA_HUMAN Prelamin-A/C OS=Homo sapiens OX=9606 GN=LMNA PE=1 SV=1	8.33333	Modified residue	Note=N6-acetyllysine;Ontology_term=ECO:0000250;evidence=ECO:0000250|UniProtKB:P48678
P02545_K470	LMNA	SNEDQSMGNWQIK*R	LMNA_HUMAN Prelamin-A/C OS=Homo sapiens OX=9606 GN=LMNA PE=1 SV=1	10	Cross-link	Note=Glycyl lysine isopeptide (Lys-Gly) (interchain with G-Cter in SUMO2);Ontology_term=ECO:0007744;evidence=ECO:0007744|PubMed:28112733;Dbxref=PMID:28112733
P02545_K78	LMNA	EVSGIK*AAYEAELGDAR	LMNA_HUMAN Prelamin-A/C OS=Homo sapiens OX=9606 GN=LMNA PE=1 SV=1	9.70086
P02545_K90	LMNA	K*TLDSVAK	LMNA_HUMAN Prelamin-A/C OS=Homo sapiens OX=9606 GN=LMNA PE=1 SV=1	6.69643
P02545_K97	LMNA	TLDSVAK*ER	LMNA_HUMAN Prelamin-A/C OS=Homo sapiens OX=9606 GN=LMNA PE=1 SV=1	5.99868	Cross-link	Note=Glycyl lysine isopeptide (Lys-Gly) (interchain with G-Cter in SUMO2);Ontology_term=ECO:0007744,ECO:0007744,ECO:0007744;evidence=ECO:0007744|PubMed:25218447,ECO:0007744|PubMed:25772364,ECO:0007744|PubMed:28112733;Dbxref=PMID:25218447,PMID:25772364,PMID:28112733
P02768_K229	ALB	CASLQK*FGER	ALBU_HUMAN Albumin OS=Homo sapiens OX=9606 GN=ALB PE=1 SV=2	6.21169	Site$Modified residue$Disulfide bond	Note=Not glycated;Ontology_term=ECO:0000269;evidence=ECO:0000269|PubMed:15047055;Dbxref=PMID:15047055$Note=N6-succinyllysine;Ontology_term=ECO:0000250;evidence=ECO:0000250|UniProtKB:P07724$Ontology_term=ECO:0000255,ECO:0000269,ECO:0000269,ECO:0007744;evidence=ECO:0000255|PROSITE-ProRule:PRU00769,ECO:0000269|PubMed:28567254,ECO:0000269|Ref.28,ECO:0007744|PDB:5IJF;Dbxref=PMID:28567254
P02768_K298	ALB	YICENQDSISSK*LK	ALBU_HUMAN Albumin OS=Homo sapiens OX=9606 GN=ALB PE=1 SV=2	10	Site$Disulfide bond	Note=Not glycated;Ontology_term=ECO:0000269;evidence=ECO:0000269|PubMed:15047055;Dbxref=PMID:15047055$Ontology_term=ECO:0000255,ECO:0000269,ECO:0000269,ECO:0007744;evidence=ECO:0000255|PROSITE-ProRule:PRU00769,ECO:0000269|PubMed:28567254,ECO:0000269|Ref.28,ECO:0007744|PDB:5IJF;Dbxref=PMID:28567254
P02786_K58	TFRC	ANVTK*PK	TFR1_HUMAN Transferrin receptor protein 1 OS=Homo sapiens OX=9606 GN=TFRC PE=1 SV=2	9.82143
P02786_K95	TFRC	GVEPK*TECER	TFR1_HUMAN Transferrin receptor protein 1 OS=Homo sapiens OX=9606 GN=TFRC PE=1 SV=2	10
P04075_K14	ALDOA	K*ELSDIAHR	ALDOA_HUMAN Fructose-bisphosphate aldolase A OS=Homo sapiens OX=9606 GN=ALDOA PE=1 SV=2	10
P04075_K312	ALDOA	ALQASALK*AWGGK	ALDOA_HUMAN Fructose-bisphosphate aldolase A OS=Homo sapiens OX=9606 GN=ALDOA PE=1 SV=2	0.9434	Modified residue	Note=N6-malonyllysine;Ontology_term=ECO:0000269;evidence=ECO:0000269|PubMed:21908771;Dbxref=PMID:21908771
P04075_K330	ALDOA	AAQEEYVK*R	ALDOA_HUMAN Fructose-bisphosphate aldolase A OS=Homo sapiens OX=9606 GN=ALDOA PE=1 SV=2	1.21951	Modified residue	Note=N6-acetyllysine;Ontology_term=ECO:0007744;evidence=ECO:0007744|PubMed:19608861;Dbxref=PMID:19608861
P04075_K42	ALDOA	GILAADESTGSIAK*R	ALDOA_HUMAN Fructose-bisphosphate aldolase A OS=Homo sapiens OX=9606 GN=ALDOA PE=1 SV=2	8.27489	Modified residue$Cross-link	Note=N6-acetyllysine%3B alternate;Ontology_term=ECO:0007744;evidence=ECO:0007744|PubMed:19608861;Dbxref=PMID:19608861$Note=Glycyl lysine isopeptide (Lys-Gly) (interchain with G-Cter in SUMO1)%3B alternate;Ontology_term=ECO:0007744;evidence=ECO:0007744|PubMed:25114211;Dbxref=PMID:25114211
P04080_K91	CSTB	AK*HDELTYF	CYTB_HUMAN Cystatin-B OS=Homo sapiens OX=9606 GN=CSTB PE=1 SV=2	7.03463
P04083_K166	ANXA1	DLAK*DITSDTSGDFR	ANXA1_HUMAN Annexin A1 OS=Homo sapiens OX=9606 GN=ANXA1 PE=1 SV=2	5.88235
P04083_K245	ANXA1	YSK*HDMNK	ANXA1_HUMAN Annexin A1 OS=Homo sapiens OX=9606 GN=ANXA1 PE=1 SV=2	1.173
P04083_K250	ANXA1	HDMNK*VLDLELK	ANXA1_HUMAN Annexin A1 OS=Homo sapiens OX=9606 GN=ANXA1 PE=1 SV=2	1.1236
P04083_K312	ANXA1	SEIDMNDIK*AFYQK	ANXA1_HUMAN Annexin A1 OS=Homo sapiens OX=9606 GN=ANXA1 PE=1 SV=2	5.28473	Modified residue	Note=N6-acetyllysine;Ontology_term=ECO:0007744;evidence=ECO:0007744|PubMed:19608861;Dbxref=PMID:19608861
P04083_K90	ANXA1	AAYLQETGK*PLDETLK	ANXA1_HUMAN Annexin A1 OS=Homo sapiens OX=9606 GN=ANXA1 PE=1 SV=2	6.34921
P04083_K97	ANXA1	AAYLQETGKPLDETLK*K	ANXA1_HUMAN Annexin A1 OS=Homo sapiens OX=9606 GN=ANXA1 PE=1 SV=2	10	Metal binding	Note=Calcium 2%3B via carbonyl oxygen;Ontology_term=ECO:0000250;evidence=ECO:0000250|UniProtKB:P19619
P04181_K405	OAT	DNGLLAK*PTHGDIIR	OAT_HUMAN Ornithine aminotransferase, mitochondrial OS=Homo sapiens OX=9606 GN=OAT PE=1 SV=1	8.59593	Modified residue	Note=N6-acetyllysine%3B alternate;Ontology_term=ECO:0000250;evidence=ECO:0000250|UniProtKB:P29758
P04233_K43	CD74	RPGAPESK*CSR	HG2A_HUMAN HLA class II histocompatibility antigen gamma chain OS=Homo sapiens OX=9606 GN=CD74 PE=1 SV=3	6.79233
P04406_K117	GAPDH	AGAHLQGGAK*R	G3P_HUMAN Glyceraldehyde-3-phosphate dehydrogenase OS=Homo sapiens OX=9606 GN=GAPDH PE=1 SV=3	9.63481
P04406_K194	GAPDH	TVDGPSGK*LWR	G3P_HUMAN Glyceraldehyde-3-phosphate dehydrogenase OS=Homo sapiens OX=9606 GN=GAPDH PE=1 SV=3	7.41758	Modified residue	Note=N6%2CN6-dimethyllysine%3B alternate;Ontology_term=ECO:0000269;evidence=ECO:0000269|PubMed:18183946;Dbxref=PMID:18183946
P04406_K215	GAPDH	GALQNIIPASTGAAK*AVGK	G3P_HUMAN Glyceraldehyde-3-phosphate dehydrogenase OS=Homo sapiens OX=9606 GN=GAPDH PE=1 SV=3	10	Modified residue	Note=N6%2CN6-dimethyllysine%3B alternate;Ontology_term=ECO:0000269;evidence=ECO:0000269|PubMed:18183946;Dbxref=PMID:18183946
P04406_K219	GAPDH	AVGK*VIPELNGK	G3P_HUMAN Glyceraldehyde-3-phosphate dehydrogenase OS=Homo sapiens OX=9606 GN=GAPDH PE=1 SV=3	9.79167	Modified residue	Note=N6-acetyllysine;Ontology_term=ECO:0007744;evidence=ECO:0007744|PubMed:19608861;Dbxref=PMID:19608861
P04406_K251	GAPDH	LEK*PAKYDDIK	G3P_HUMAN Glyceraldehyde-3-phosphate dehydrogenase OS=Homo sapiens OX=9606 GN=GAPDH PE=1 SV=3	7.69231
P04406_K254	GAPDH	LEKPAK*YDDIK LEKPAK*YDDIKK	G3P_HUMAN Glyceraldehyde-3-phosphate dehydrogenase OS=Homo sapiens OX=9606 GN=GAPDH PE=1 SV=3	10	Modified residue	Note=N6-acetyllysine;Ontology_term=ECO:0007744;evidence=ECO:0007744|PubMed:19608861;Dbxref=PMID:19608861
P04406_K260	GAPDH	K*VVKQASEGPLK	G3P_HUMAN Glyceraldehyde-3-phosphate dehydrogenase OS=Homo sapiens OX=9606 GN=GAPDH PE=1 SV=3	10	Modified residue	Note=N6%2CN6-dimethyllysine;Ontology_term=ECO:0000269;evidence=ECO:0000269|PubMed:18183946;Dbxref=PMID:18183946
P04406_K263	GAPDH	VVK*QASEGPLK	G3P_HUMAN Glyceraldehyde-3-phosphate dehydrogenase OS=Homo sapiens OX=9606 GN=GAPDH PE=1 SV=3	10	Modified residue	Note=N6%2CN6-dimethyllysine;Ontology_term=ECO:0000269;evidence=ECO:0000269|PubMed:18183946;Dbxref=PMID:18183946
P04406_K61	GAPDH	FHGTVK*AENGK	G3P_HUMAN Glyceraldehyde-3-phosphate dehydrogenase OS=Homo sapiens OX=9606 GN=GAPDH PE=1 SV=3	5.99791	Modified residue	Note=N6-acetyllysine;Ontology_term=ECO:0007744;evidence=ECO:0007744|PubMed:19608861;Dbxref=PMID:19608861
P04439_K340	HLA-A	K*GGSYTQAASSDSAQGSDVSLTACK	HLAA_HUMAN HLA class I histocompatibility antigen, A alpha chain OS=Homo sapiens OX=9606 GN=HLA-A PE=1 SV=2	9.09091
P04792_K112	HSPB1	VSLDVNHFAPDELTVK*TK	HSPB1_HUMAN Heat shock protein beta-1 OS=Homo sapiens OX=9606 GN=HSPB1 PE=1 SV=2	3.93574
P04792_K123	HSPB1	DGVVEITGK*HEER TKDGVVEITGK*HEER	HSPB1_HUMAN Heat shock protein beta-1 OS=Homo sapiens OX=9606 GN=HSPB1 PE=1 SV=2	8.11966	Modified residue	Note=N6-acetyllysine;Ontology_term=ECO:0007744;evidence=ECO:0007744|PubMed:19608861;Dbxref=PMID:19608861
P04818_K278	TYMS	PFPK*LR	TYSY_HUMAN Thymidylate synthase OS=Homo sapiens OX=9606 GN=TYMS PE=1 SV=3	9.09091
P04843_K516	RPN1	DISTLNSGK*K	RPN1_HUMAN Dolichyl-diphosphooligosaccharide--protein glycosyltransferase subunit 1 OS=Homo sapiens OX=9606 GN=RPN1 PE=1 SV=1	10
P04843_K538	RPN1	LK*TEGSDLCDR	RPN1_HUMAN Dolichyl-diphosphooligosaccharide--protein glycosyltransferase subunit 1 OS=Homo sapiens OX=9606 GN=RPN1 PE=1 SV=1	6.55556	Modified residue$Cross-link	Note=N6-acetyllysine%3B alternate;Ontology_term=ECO:0000250;evidence=ECO:0000250|UniProtKB:Q91YQ5$Note=Glycyl lysine isopeptide (Lys-Gly) (interchain with G-Cter in SUMO2)%3B alternate;Ontology_term=ECO:0007744;evidence=ECO:0007744|PubMed:25114211;Dbxref=PMID:25114211
P04843_K564	RPN1	ELVLK*SAVEAER	RPN1_HUMAN Dolichyl-diphosphooligosaccharide--protein glycosyltransferase subunit 1 OS=Homo sapiens OX=9606 GN=RPN1 PE=1 SV=1	10
P04844_K311	RPN2	LEHAK*SVASR	RPN2_HUMAN Dolichyl-diphosphooligosaccharide--protein glycosyltransferase subunit 2 OS=Homo sapiens OX=9606 GN=RPN2 PE=1 SV=3	10
P04844_K627	RPN2	MLAQQAVK*R	RPN2_HUMAN Dolichyl-diphosphooligosaccharide--protein glycosyltransferase subunit 2 OS=Homo sapiens OX=9606 GN=RPN2 PE=1 SV=3	10
P04899_K272	GNAI2	K*DLFEEK	GNAI2_HUMAN Guanine nucleotide-binding protein G(i) subunit alpha-2 OS=Homo sapiens OX=9606 GN=GNAI2 PE=1 SV=3	5.55556
P05023_K377	ATP1A1	NLEAVETLGSTSTICSDK*TGTLTQNR	AT1A1_HUMAN Sodium/potassium-transporting ATPase subunit alpha-1 OS=Homo sapiens OX=9606 GN=ATP1A1 PE=1 SV=1	0.514265
P05023_K444	ATP1A1	AVFQANQENLPILK*R	AT1A1_HUMAN Sodium/potassium-transporting ATPase subunit alpha-1 OS=Homo sapiens OX=9606 GN=ATP1A1 PE=1 SV=1	7.69231
P05023_K45	ATP1A1	EVSMDDHK*LSLDELHR	AT1A1_HUMAN Sodium/potassium-transporting ATPase subunit alpha-1 OS=Homo sapiens OX=9606 GN=ATP1A1 PE=1 SV=1	10
P05023_K605	ATP1A1	AAVPDAVGK*CR	AT1A1_HUMAN Sodium/potassium-transporting ATPase subunit alpha-1 OS=Homo sapiens OX=9606 GN=ATP1A1 PE=1 SV=1	9.29487
P05023_K661	ATP1A1	DAK*ACVVHGSDLK	AT1A1_HUMAN Sodium/potassium-transporting ATPase subunit alpha-1 OS=Homo sapiens OX=9606 GN=ATP1A1 PE=1 SV=1	7.28297	Modified residue	Note=N6-succinyllysine;Ontology_term=ECO:0000250;evidence=ECO:0000250|UniProtKB:Q8VDN2
P05023_K726	ATP1A1	QGAIVAVTGDGVNDSPALK*K	AT1A1_HUMAN Sodium/potassium-transporting ATPase subunit alpha-1 OS=Homo sapiens OX=9606 GN=ATP1A1 PE=1 SV=1	10
P05023_K727	ATP1A1	K*ADIGVAMGIAGSDVSK	AT1A1_HUMAN Sodium/potassium-transporting ATPase subunit alpha-1 OS=Homo sapiens OX=9606 GN=ATP1A1 PE=1 SV=1	6.98886
P05023_K773	ATP1A1	LIFDNLK*K	AT1A1_HUMAN Sodium/potassium-transporting ATPase subunit alpha-1 OS=Homo sapiens OX=9606 GN=ATP1A1 PE=1 SV=1	10
P05023_K843	ATP1A1	TDK*LVNER	AT1A1_HUMAN Sodium/potassium-transporting ATPase subunit alpha-1 OS=Homo sapiens OX=9606 GN=ATP1A1 PE=1 SV=1	8.566
P05023_K950	ATP1A1	NSVFQQGMK*NK	AT1A1_HUMAN Sodium/potassium-transporting ATPase subunit alpha-1 OS=Homo sapiens OX=9606 GN=ATP1A1 PE=1 SV=1	7.69231
P05026_K13	ATP1B1	AKEEGSWK*K	AT1B1_HUMAN Sodium/potassium-transporting ATPase subunit beta-1 OS=Homo sapiens OX=9606 GN=ATP1B1 PE=1 SV=1	6.66667
P05026_K288	ATP1B1	AYGENIGYSEK*DR	AT1B1_HUMAN Sodium/potassium-transporting ATPase subunit beta-1 OS=Homo sapiens OX=9606 GN=ATP1B1 PE=1 SV=1	10
P05141_K105	SLC25A5	QIFLGGVDK*R	ADT2_HUMAN ADP/ATP translocase 2 OS=Homo sapiens OX=9606 GN=SLC25A5 PE=1 SV=7	9.69373	Modified residue	Note=N6-acetyllysine%3B alternate;Ontology_term=ECO:0007744;evidence=ECO:0007744|PubMed:19608861;Dbxref=PMID:19608861
P05141_K147	SLC25A5	LAADVGK*AGAER	ADT2_HUMAN ADP/ATP translocase 2 OS=Homo sapiens OX=9606 GN=SLC25A5 PE=1 SV=7	10	Modified residue	Note=N6-acetyllysine%3B alternate;Ontology_term=ECO:0000250;evidence=ECO:0000250|UniProtKB:P51881
P05141_K163	SLC25A5	GLGDCLVK*IYK	ADT2_HUMAN ADP/ATP translocase 2 OS=Homo sapiens OX=9606 GN=SLC25A5 PE=1 SV=7	10	Modified residue	Note=N6-acetyllysine;Ontology_term=ECO:0007744;evidence=ECO:0007744|PubMed:19608861;Dbxref=PMID:19608861
P05141_K166	SLC25A5	IYK*SDGIK	ADT2_HUMAN ADP/ATP translocase 2 OS=Homo sapiens OX=9606 GN=SLC25A5 PE=1 SV=7	5.42863	Modified residue	Note=N6-acetyllysine;Ontology_term=ECO:0000250;evidence=ECO:0000250|UniProtKB:P51881
P05141_K43	SLC25A5	ASK*QITADK	ADT2_HUMAN ADP/ATP translocase 2 OS=Homo sapiens OX=9606 GN=SLC25A5 PE=1 SV=7	6.10745	Modified residue	Note=N6-succinyllysine;Ontology_term=ECO:0000250;evidence=ECO:0000250|UniProtKB:P51881
P05198_K190	EIF2S1	LTPQAVK*IR	IF2A_HUMAN Eukaryotic translation initiation factor 2 subunit 1 OS=Homo sapiens OX=9606 GN=EIF2S1 PE=1 SV=3	10
P05204_K36	HMGN2	PAPPK*PEPK	HMGN2_HUMAN Non-histone chromosomal protein HMG-17 OS=Homo sapiens OX=9606 GN=HMGN2 PE=1 SV=3	7.48663
P05204_K59	HMGN2	GK*ADAGK	HMGN2_HUMAN Non-histone chromosomal protein HMG-17 OS=Homo sapiens OX=9606 GN=HMGN2 PE=1 SV=3	0.9901
P05546_K271	SERPIND1	LTK*GLIK	HEP2_HUMAN Heparin cofactor 2 OS=Homo sapiens OX=9606 GN=SERPIND1 PE=1 SV=3	10
P05783_K167	KRT18	VK*YETELAMR	K1C18_HUMAN Keratin, type I cytoskeletal 18 OS=Homo sapiens OX=9606 GN=KRT18 PE=1 SV=2	10
P05783_K187	KRT18	K*VIDDTNITR	K1C18_HUMAN Keratin, type I cytoskeletal 18 OS=Homo sapiens OX=9606 GN=KRT18 PE=1 SV=2	10
P05783_K215	KRT18	K*NHEEEVK	K1C18_HUMAN Keratin, type I cytoskeletal 18 OS=Homo sapiens OX=9606 GN=KRT18 PE=1 SV=2	10
P05783_K317	KRT18	NLK*ASLENSLR	K1C18_HUMAN Keratin, type I cytoskeletal 18 OS=Homo sapiens OX=9606 GN=KRT18 PE=1 SV=2	9.08224
P05783_K372	KRT18	VK*LEAEIATYR	K1C18_HUMAN Keratin, type I cytoskeletal 18 OS=Homo sapiens OX=9606 GN=KRT18 PE=1 SV=2	10	Cross-link	Note=Glycyl lysine isopeptide (Lys-Gly) (interchain with G-Cter in SUMO2);Ontology_term=ECO:0007744;evidence=ECO:0007744|PubMed:28112733;Dbxref=PMID:28112733
P05783_K417	KRT18	IVDGK*VVSETNDTK	K1C18_HUMAN Keratin, type I cytoskeletal 18 OS=Homo sapiens OX=9606 GN=KRT18 PE=1 SV=2	8.08153	Cross-link	Note=Glycyl lysine isopeptide (Lys-Gly) (interchain with G-Cter in SUMO2);Ontology_term=ECO:0007744;evidence=ECO:0007744|PubMed:28112733;Dbxref=PMID:28112733
P05783_K426	KRT18	VVSETNDTK*VLR	K1C18_HUMAN Keratin, type I cytoskeletal 18 OS=Homo sapiens OX=9606 GN=KRT18 PE=1 SV=2	10	Modified residue$Cross-link	Note=N6-acetyllysine%3B alternate;Ontology_term=ECO:0007744;evidence=ECO:0007744|PubMed:19608861;Dbxref=PMID:19608861$Note=Glycyl lysine isopeptide (Lys-Gly) (interchain with G-Cter in SUMO1)%3B alternate;Ontology_term=ECO:0007744;evidence=ECO:0007744|PubMed:25114211;Dbxref=PMID:25114211
P05787_K11	KRT8	SYK*VSTSGPR	K2C8_HUMAN Keratin, type II cytoskeletal 8 OS=Homo sapiens OX=9606 GN=KRT8 PE=1 SV=7	8.33333	Cross-link	Note=Glycyl lysine isopeptide (Lys-Gly) (interchain with G-Cter in SUMO2);Ontology_term=ECO:0007744;evidence=ECO:0007744|PubMed:28112733;Dbxref=PMID:28112733
P05787_K117	KRT8	FLEQQNK*MLETK	K2C8_HUMAN Keratin, type II cytoskeletal 8 OS=Homo sapiens OX=9606 GN=KRT8 PE=1 SV=7	3.81752
P05787_K122	KRT8	MLETK*WSLLQQQK	K2C8_HUMAN Keratin, type II cytoskeletal 8 OS=Homo sapiens OX=9606 GN=KRT8 PE=1 SV=7	10	Cross-link	Note=Glycyl lysine isopeptide (Lys-Gly) (interchain with G-Cter in SUMO2);Ontology_term=ECO:0007744;evidence=ECO:0007744|PubMed:28112733;Dbxref=PMID:28112733
P05787_K158	KRT8	QLETLGQEK*LK	K2C8_HUMAN Keratin, type II cytoskeletal 8 OS=Homo sapiens OX=9606 GN=KRT8 PE=1 SV=7	10
P05787_K198	KRT8	K*DVDEAYMNK	K2C8_HUMAN Keratin, type II cytoskeletal 8 OS=Homo sapiens OX=9606 GN=KRT8 PE=1 SV=7	1.11111
P05787_K285	KRT8	AEAESMYQIK*YEELQSLAGK	K2C8_HUMAN Keratin, type II cytoskeletal 8 OS=Homo sapiens OX=9606 GN=KRT8 PE=1 SV=7	7.15732	Cross-link	Note=Glycyl lysine isopeptide (Lys-Gly) (interchain with G-Cter in SUMO2);Ontology_term=ECO:0007744,ECO:0007744,ECO:0007744;evidence=ECO:0007744|PubMed:25114211,ECO:0007744|PubMed:25218447,ECO:0007744|PubMed:28112733;Dbxref=PMID:25114211,PMID:25218447,PMID:28112733
P05787_K295	KRT8	YEELQSLAGK*HGDDLR	K2C8_HUMAN Keratin, type II cytoskeletal 8 OS=Homo sapiens OX=9606 GN=KRT8 PE=1 SV=7	8.61111	Modified residue$Cross-link	Note=N6-acetyllysine%3B alternate;Ontology_term=ECO:0007744;evidence=ECO:0007744|PubMed:19608861;Dbxref=PMID:19608861$Note=Glycyl lysine isopeptide (Lys-Gly) (interchain with G-Cter in SUMO2)%3B alternate;Ontology_term=ECO:0007744;evidence=ECO:0007744|PubMed:28112733;Dbxref=PMID:28112733
P05787_K304	KRT8	TK*TEISEMNR	K2C8_HUMAN Keratin, type II cytoskeletal 8 OS=Homo sapiens OX=9606 GN=KRT8 PE=1 SV=7	6.75392	Cross-link	Note=Glycyl lysine isopeptide (Lys-Gly) (interchain with G-Cter in SUMO2);Ontology_term=ECO:0007744,ECO:0007744;evidence=ECO:0007744|PubMed:25218447,ECO:0007744|PubMed:28112733;Dbxref=PMID:25218447,PMID:28112733
P05787_K325	KRT8	LQAEIEGLK*GQR	K2C8_HUMAN Keratin, type II cytoskeletal 8 OS=Homo sapiens OX=9606 GN=KRT8 PE=1 SV=7	6.74763	Modified residue$Cross-link	Note=N6-acetyllysine%3B alternate;Ontology_term=ECO:0007744;evidence=ECO:0007744|PubMed:19608861;Dbxref=PMID:19608861$Note=Glycyl lysine isopeptide (Lys-Gly) (interchain with G-Cter in SUMO2)%3B alternate;Ontology_term=ECO:0007744;evidence=ECO:0007744|PubMed:28112733;Dbxref=PMID:28112733
P05787_K347	KRT8	GELAIK*DANAK	K2C8_HUMAN Keratin, type II cytoskeletal 8 OS=Homo sapiens OX=9606 GN=KRT8 PE=1 SV=7	7.88184
P05787_K472	KRT8	DGK*LVSESSDVLPK	K2C8_HUMAN Keratin, type II cytoskeletal 8 OS=Homo sapiens OX=9606 GN=KRT8 PE=1 SV=7	9.09091	Cross-link	Note=Glycyl lysine isopeptide (Lys-Gly) (interchain with G-Cter in SUMO1)%3B alternate;Ontology_term=ECO:0007744;evidence=ECO:0007744|PubMed:25114211;Dbxref=PMID:25114211
P05787_K8	KRT8	VTQK*SYK	K2C8_HUMAN Keratin, type II cytoskeletal 8 OS=Homo sapiens OX=9606 GN=KRT8 PE=1 SV=7	10
P05787_K92	KRT8	TQEK*EQIK	K2C8_HUMAN Keratin, type II cytoskeletal 8 OS=Homo sapiens OX=9606 GN=KRT8 PE=1 SV=7	0.707503
P06241_K427	FYN	QGAK*FPIK	FYN_HUMAN Tyrosine-protein kinase Fyn OS=Homo sapiens OX=9606 GN=FYN PE=1 SV=3	10
P06396_K239	GSN	LK*ATQVSK	GELS_HUMAN Gelsolin OS=Homo sapiens OX=9606 GN=GSN PE=1 SV=1	10
P06396_K720	GSN	DSQEEEK*TEALTSAK	GELS_HUMAN Gelsolin OS=Homo sapiens OX=9606 GN=GSN PE=1 SV=1	4.74806
P06576_K124	ATP5F1B	GQK*VLDSGAPIK	ATPB_HUMAN ATP synthase subunit beta, mitochondrial OS=Homo sapiens OX=9606 GN=ATP5F1B PE=1 SV=3	6.00748	Modified residue	Note=N6-acetyllysine%3B alternate;Ontology_term=ECO:0000250;evidence=ECO:0000250|UniProtKB:P56480
P06576_K426	ATP5F1B	GVQK*ILQDYK	ATPB_HUMAN ATP synthase subunit beta, mitochondrial OS=Homo sapiens OX=9606 GN=ATP5F1B PE=1 SV=3	10	Modified residue	Note=N6-acetyllysine;Ontology_term=ECO:0007744;evidence=ECO:0007744|PubMed:19608861;Dbxref=PMID:19608861
P06703_K26	S100A6	EGDK*HTLSK	S10A6_HUMAN Protein S100-A6 OS=Homo sapiens OX=9606 GN=S100A6 PE=1 SV=1	7.0842
P06703_K31	S100A6	HTLSK*K	S10A6_HUMAN Protein S100-A6 OS=Homo sapiens OX=9606 GN=S100A6 PE=1 SV=1	10
P06703_K35	S100A6	KELK*ELIQK	S10A6_HUMAN Protein S100-A6 OS=Homo sapiens OX=9606 GN=S100A6 PE=1 SV=1	10
P06703_K40	S100A6	ELIQK*ELTIGSK	S10A6_HUMAN Protein S100-A6 OS=Homo sapiens OX=9606 GN=S100A6 PE=1 SV=1	10	Modified residue	Note=N6-acetyllysine;Ontology_term=ECO:0007744;evidence=ECO:0007744|PubMed:19608861;Dbxref=PMID:19608861
P06703_K47	S100A6	ELTIGSK*LQDAEIAR TIGSK*LQDAEIAR	S10A6_HUMAN Protein S100-A6 OS=Homo sapiens OX=9606 GN=S100A6 PE=1 SV=1	9.69697	Modified residue	Note=N6-acetyllysine%3B alternate;Ontology_term=ECO:0000250;evidence=ECO:0000250|UniProtKB:P14069
P06733_K193	ENO1	IGAEVYHNLK*NVIK	ENOA_HUMAN Alpha-enolase OS=Homo sapiens OX=9606 GN=ENO1 PE=1 SV=2	5.26316	Modified residue	Note=N6-acetyllysine;Ontology_term=ECO:0007744;evidence=ECO:0007744|PubMed:19608861;Dbxref=PMID:19608861
P06733_K197	ENO1	NVIK*EK NVLK*EK	ENOA_HUMAN Alpha-enolase OS=Homo sapiens OX=9606 GN=ENO1 PE=1 SV=2	10
P06733_K233	ENO1	TAIGK*AGYTDK	ENOA_HUMAN Alpha-enolase OS=Homo sapiens OX=9606 GN=ENO1 PE=1 SV=2	10	Modified residue	Note=N6-acetyllysine%3B alternate;Ontology_term=ECO:0007744;evidence=ECO:0007744|PubMed:19608861;Dbxref=PMID:19608861
P06733_K256	ENO1	SGK*YDLDFK	ENOA_HUMAN Alpha-enolase OS=Homo sapiens OX=9606 GN=ENO1 PE=1 SV=2	6.86966	Modified residue	Note=N6-acetyllysine;Ontology_term=ECO:0007744;evidence=ECO:0007744|PubMed:19608861;Dbxref=PMID:19608861
P06733_K330	ENO1	IAK*AVNEK	ENOA_HUMAN Alpha-enolase OS=Homo sapiens OX=9606 GN=ENO1 PE=1 SV=2	10
P06733_K420	ENO1	IEEELGSK*AK	ENOA_HUMAN Alpha-enolase OS=Homo sapiens OX=9606 GN=ENO1 PE=1 SV=2	8.37957	Modified residue	Note=N6-acetyllysine%3B alternate;Ontology_term=ECO:0007744;evidence=ECO:0007744|PubMed:19608861;Dbxref=PMID:19608861
P06733_K64	ENO1	GVSK*AVEHINK	ENOA_HUMAN Alpha-enolase OS=Homo sapiens OX=9606 GN=ENO1 PE=1 SV=2	10	Modified residue	Note=N6-acetyllysine;Ontology_term=ECO:0007744;evidence=ECO:0007744|PubMed:19608861;Dbxref=PMID:19608861
P06733_K71	ENO1	AVEHINK*TIAPALVSK	ENOA_HUMAN Alpha-enolase OS=Homo sapiens OX=9606 GN=ENO1 PE=1 SV=2	10	Modified residue	Note=N6-acetyllysine;Ontology_term=ECO:0007744;evidence=ECO:0007744|PubMed:19608861;Dbxref=PMID:19608861
P06733_K80	ENO1	TIAPALVSK*K	ENOA_HUMAN Alpha-enolase OS=Homo sapiens OX=9606 GN=ENO1 PE=1 SV=2	7.14286
P06733_K89	ENO1	KLNVTEQEK*IDK LNVTEQEK*IDK	ENOA_HUMAN Alpha-enolase OS=Homo sapiens OX=9606 GN=ENO1 PE=1 SV=2	1.53846	Modified residue	Note=N6-acetyllysine%3B alternate;Ontology_term=ECO:0007744;evidence=ECO:0007744|PubMed:19608861;Dbxref=PMID:19608861
P06733_K92	ENO1	IDK*LMIEMDGTENK	ENOA_HUMAN Alpha-enolase OS=Homo sapiens OX=9606 GN=ENO1 PE=1 SV=2	8.33333	Modified residue	Note=N6-acetyllysine;Ontology_term=ECO:0000250;evidence=ECO:0000250|UniProtKB:P17182
P06744_K454	GPI	ELQAAGK*SPEDLER	G6PI_HUMAN Glucose-6-phosphate isomerase OS=Homo sapiens OX=9606 GN=GPI PE=1 SV=4	0.98039	Modified residue	Note=N6-acetyllysine%3B alternate;Ontology_term=ECO:0000250;evidence=ECO:0000250|UniProtKB:P06745
P06748_K150	NPM1	SAPGGGSK*VPQK	NPM_HUMAN Nucleophosmin OS=Homo sapiens OX=9606 GN=NPM1 PE=1 SV=2	10	Modified residue$Cross-link	Note=N6-acetyllysine%3B alternate;Ontology_term=ECO:0007744,ECO:0007744;evidence=ECO:0007744|PubMed:16916647,ECO:0007744|PubMed:19608861;Dbxref=PMID:16916647,PMID:19608861$Note=Glycyl lysine isopeptide (Lys-Gly) (interchain with G-Cter in SUMO2)%3B alternate;Ontology_term=ECO:0007744;evidence=ECO:0007744|PubMed:28112733;Dbxref=PMID:28112733
P06748_K202	NPM1	DTPAK*NAQK	NPM_HUMAN Nucleophosmin OS=Homo sapiens OX=9606 GN=NPM1 PE=1 SV=2	7.09559
P06748_K206	NPM1	NAQK*SNQNGK	NPM_HUMAN Nucleophosmin OS=Homo sapiens OX=9606 GN=NPM1 PE=1 SV=2	6.26102
P06748_K215	NPM1	DSK*PSSTPR	NPM_HUMAN Nucleophosmin OS=Homo sapiens OX=9606 GN=NPM1 PE=1 SV=2	9.09091	Cross-link	Note=Glycyl lysine isopeptide (Lys-Gly) (interchain with G-Cter in SUMO2);Ontology_term=ECO:0007744,ECO:0007744;evidence=ECO:0007744|PubMed:25772364,ECO:0007744|PubMed:28112733;Dbxref=PMID:25772364,PMID:28112733
P06748_K223	NPM1	SK*GQESFK	NPM_HUMAN Nucleophosmin OS=Homo sapiens OX=9606 GN=NPM1 PE=1 SV=2	3.5456
P06748_K229	NPM1	GQESFK*K	NPM_HUMAN Nucleophosmin OS=Homo sapiens OX=9606 GN=NPM1 PE=1 SV=2	5.50421	Modified residue	Note=N6-acetyllysine;Ontology_term=ECO:0000269;evidence=ECO:0000269|PubMed:16107701;Dbxref=PMID:16107701
P06748_K233	NPM1	KQEK*TPK	NPM_HUMAN Nucleophosmin OS=Homo sapiens OX=9606 GN=NPM1 PE=1 SV=2	7.14286
P06748_K236	NPM1	TPK*TPK	NPM_HUMAN Nucleophosmin OS=Homo sapiens OX=9606 GN=NPM1 PE=1 SV=2	10
P06748_K239	NPM1	TPK*GPSSVEDIK	NPM_HUMAN Nucleophosmin OS=Homo sapiens OX=9606 GN=NPM1 PE=1 SV=2	9.88095
P06748_K248	NPM1	GPSSVEDIK*AK	NPM_HUMAN Nucleophosmin OS=Homo sapiens OX=9606 GN=NPM1 PE=1 SV=2	8.45959	Cross-link	Note=Glycyl lysine isopeptide (Lys-Gly) (interchain with G-Cter in SUMO1)%3B alternate;Ontology_term=ECO:0007744;evidence=ECO:0007744|PubMed:25114211;Dbxref=PMID:25114211
P06748_K250	NPM1	AK*MQASIEK	NPM_HUMAN Nucleophosmin OS=Homo sapiens OX=9606 GN=NPM1 PE=1 SV=2	4.99639	Modified residue$Cross-link	Note=N6-acetyllysine%3B alternate;Ontology_term=ECO:0000269;evidence=ECO:0000269|PubMed:16107701;Dbxref=PMID:16107701$Note=Glycyl lysine isopeptide (Lys-Gly) (interchain with G-Cter in SUMO2)%3B alternate;Ontology_term=ECO:0007744,ECO:0007744;evidence=ECO:0007744|PubMed:25218447,ECO:0007744|PubMed:28112733;Dbxref=PMID:25218447,PMID:28112733
P06748_K257	NPM1	MQASIEK*GGSLPK	NPM_HUMAN Nucleophosmin OS=Homo sapiens OX=9606 GN=NPM1 PE=1 SV=2	7.92328	Modified residue$Cross-link	Note=N6-acetyllysine%3B alternate;Ontology_term=ECO:0000269,ECO:0007744;evidence=ECO:0000269|PubMed:16107701,ECO:0007744|PubMed:19608861;Dbxref=PMID:16107701,PMID:19608861$Note=Glycyl lysine isopeptide (Lys-Gly) (interchain with G-Cter in SUMO1)%3B alternate;Ontology_term=ECO:0007744;evidence=ECO:0007744|PubMed:25114211;Dbxref=PMID:25114211
P06748_K263	NPM1	GGSLPK*VEAK	NPM_HUMAN Nucleophosmin OS=Homo sapiens OX=9606 GN=NPM1 PE=1 SV=2	6.74012	Cross-link	Note=Glycyl lysine isopeptide (Lys-Gly) (interchain with G-Cter in SUMO)%3B alternate;Ontology_term=ECO:0000269;evidence=ECO:0000269|PubMed:15897463;Dbxref=PMID:15897463
P06748_K27	NPM1	ADK*DYHFK	NPM_HUMAN Nucleophosmin OS=Homo sapiens OX=9606 GN=NPM1 PE=1 SV=2	7.73569	Cross-link	Note=Glycyl lysine isopeptide (Lys-Gly) (interchain with G-Cter in SUMO2);Ontology_term=ECO:0007744;evidence=ECO:0007744|PubMed:25218447;Dbxref=PMID:25218447
P06748_K32	NPM1	ADKDYHFK*VDNDENEHQLSLR DYHFK*VDNDENEHQLSLR	NPM_HUMAN Nucleophosmin OS=Homo sapiens OX=9606 GN=NPM1 PE=1 SV=2	9.68272	Modified residue$Cross-link	Note=N6-acetyllysine%3B alternate;Ontology_term=ECO:0007744;evidence=ECO:0007744|PubMed:19608861;Dbxref=PMID:19608861$Note=Glycyl lysine isopeptide (Lys-Gly) (interchain with G-Cter in SUMO1)%3B alternate;Ontology_term=ECO:0007744;evidence=ECO:0007744|PubMed:25114211;Dbxref=PMID:25114211
P06753_K137	TPM3	ALK*DEEK	TPM3_HUMAN Tropomyosin alpha-3 chain OS=Homo sapiens OX=9606 GN=TPM3 PE=1 SV=2	1.6129
P06753_K150	TPM3	MEIQEIQLK*EAK	TPM3_HUMAN Tropomyosin alpha-3 chain OS=Homo sapiens OX=9606 GN=TPM3 PE=1 SV=2	10
P06753_K218	TPM3	YSQK*EDKYEEEIK	TPM3_HUMAN Tropomyosin alpha-3 chain OS=Homo sapiens OX=9606 GN=TPM3 PE=1 SV=2	10
P06753_K232	TPM3	ILTDK*LK	TPM3_HUMAN Tropomyosin alpha-3 chain OS=Homo sapiens OX=9606 GN=TPM3 PE=1 SV=2	10
P07099_K286	EPHX1	DVELLYPVK*EK	HYEP_HUMAN Epoxide hydrolase 1 OS=Homo sapiens OX=9606 GN=EPHX1 PE=1 SV=1	10
P07195_K156	LDHB	LSGLPK*HR	LDHB_HUMAN L-lactate dehydrogenase B chain OS=Homo sapiens OX=9606 GN=LDHB PE=1 SV=2	10
P07195_K308	LDHB	GLTSVINQK*LK	LDHB_HUMAN L-lactate dehydrogenase B chain OS=Homo sapiens OX=9606 GN=LDHB PE=1 SV=2	6.25
P07237_K415	P4HB	LGETYK*DHENIVIAK	PDIA1_HUMAN Protein disulfide-isomerase OS=Homo sapiens OX=9606 GN=P4HB PE=1 SV=3	9.92064
P07237_K467	P4HB	TLDGFK*K	PDIA1_HUMAN Protein disulfide-isomerase OS=Homo sapiens OX=9606 GN=P4HB PE=1 SV=3	10
P07237_K65	P4HB	ALAPEYAK*AAGK	PDIA1_HUMAN Protein disulfide-isomerase OS=Homo sapiens OX=9606 GN=P4HB PE=1 SV=3	1.13636
P07237_K71	P4HB	LK*AEGSEIR	PDIA1_HUMAN Protein disulfide-isomerase OS=Homo sapiens OX=9606 GN=P4HB PE=1 SV=3	7.30159
P07237_K81	P4HB	LAK*VDATEESDLAQQYGVR	PDIA1_HUMAN Protein disulfide-isomerase OS=Homo sapiens OX=9606 GN=P4HB PE=1 SV=3	7.20198
P07339_K127	CTSD	YNSDK*SSTYVK	CATD_HUMAN Cathepsin D OS=Homo sapiens OX=9606 GN=CTSD PE=1 SV=1	6.66667	Disulfide bond	Ontology_term=ECO:0000269;evidence=ECO:0000269|PubMed:8393577;Dbxref=PMID:8393577
P07339_K357	CTSD	LSPEDYTLK*VSQAGK	CATD_HUMAN Cathepsin D OS=Homo sapiens OX=9606 GN=CTSD PE=1 SV=1	9.75168	Disulfide bond	.
P07437_K58	TUBB	ISVYYNEATGGK*YVPR	TBB5_HUMAN Tubulin beta chain OS=Homo sapiens OX=9606 GN=TUBB PE=1 SV=2	8.28043	Modified residue$Cross-link	Note=N6-acetyllysine%3B alternate;Ontology_term=ECO:0007744;evidence=ECO:0007744|PubMed:19608861;Dbxref=PMID:19608861$Note=Glycyl lysine isopeptide (Lys-Gly) (interchain with G-Cter in ubiquitin)%3B alternate
P07602_K152	PSAP	HLAELNHQK*QLESNK	SAP_HUMAN Prosaposin OS=Homo sapiens OX=9606 GN=PSAP PE=1 SV=2	5.55556
P07602_K414	PSAP	K*LVGYLDR	SAP_HUMAN Prosaposin OS=Homo sapiens OX=9606 GN=PSAP PE=1 SV=2	5.88235	Disulfide bond	Ontology_term=ECO:0000269;evidence=ECO:0000269|PubMed:10406958;Dbxref=PMID:10406958
P07737_K105	PFN1	STGGAPTFNVTVTK*TDK	PROF1_HUMAN Profilin-1 OS=Homo sapiens OX=9606 GN=PFN1 PE=1 SV=2	10	Modified residue	Note=N6-acetyllysine;Ontology_term=ECO:0007744;evidence=ECO:0007744|PubMed:19608861;Dbxref=PMID:19608861
P07737_K108	PFN1	TDK*TLVLLMGK	PROF1_HUMAN Profilin-1 OS=Homo sapiens OX=9606 GN=PFN1 PE=1 SV=2	10	Modified residue	Note=N6-acetyllysine;Ontology_term=ECO:0007744;evidence=ECO:0007744|PubMed:19608861;Dbxref=PMID:19608861
P07737_K126	PFN1	EGVHGGLINK*K	PROF1_HUMAN Profilin-1 OS=Homo sapiens OX=9606 GN=PFN1 PE=1 SV=2	10
P07814_K1361	EPRS1	FNHWELK*GVPIR	SYEP_HUMAN Bifunctional glutamate/proline--tRNA ligase OS=Homo sapiens OX=9606 GN=EPRS1 PE=1 SV=5	10
P07858_K220	CTSB	ICEPGYSPTYK*QDK	CATB_HUMAN Cathepsin B OS=Homo sapiens OX=9606 GN=CTSB PE=1 SV=3	5.23039	Modified residue	Note=N6-acetyllysine;Ontology_term=ECO:0000250;evidence=ECO:0000250|UniProtKB:P10605
P07900_K443	HSP90AA1	FYEQFSK*NIK	HS90A_HUMAN Heat shock protein HSP 90-alpha OS=Homo sapiens OX=9606 GN=HSP90AA1 PE=1 SV=5	5.55556	Modified residue	Note=N6-acetyllysine;Ontology_term=ECO:0007744;evidence=ECO:0007744|PubMed:19608861;Dbxref=PMID:19608861
P07900_K458	HSP90AA1	K*LSELLR	HS90A_HUMAN Heat shock protein HSP 90-alpha OS=Homo sapiens OX=9606 GN=HSP90AA1 PE=1 SV=5	10	Modified residue	Note=N6-acetyllysine;Ontology_term=ECO:0007744;evidence=ECO:0007744|PubMed:19608861;Dbxref=PMID:19608861
P07900_K499	HSP90AA1	HIYYITGETK*DQVANSAFVER	HS90A_HUMAN Heat shock protein HSP 90-alpha OS=Homo sapiens OX=9606 GN=HSP90AA1 PE=1 SV=5	5.55556
P07900_K539	HSP90AA1	EFEGK*TLVSVTK	HS90A_HUMAN Heat shock protein HSP 90-alpha OS=Homo sapiens OX=9606 GN=HSP90AA1 PE=1 SV=5	9.91793
P07900_K58	HSP90AA1	ELISNSSDALDK*IR	HS90A_HUMAN Heat shock protein HSP 90-alpha OS=Homo sapiens OX=9606 GN=HSP90AA1 PE=1 SV=5	6.26634	Modified residue	Note=N6-acetyllysine;Ontology_term=ECO:0000250;evidence=ECO:0000250|UniProtKB:P07901
P07900_K632	HSP90AA1	K*HLEINPDHSIIETLR	HS90A_HUMAN Heat shock protein HSP 90-alpha OS=Homo sapiens OX=9606 GN=HSP90AA1 PE=1 SV=5	9.58333
P07900_K657	HSP90AA1	AEADKNDK*SVK	HS90A_HUMAN Heat shock protein HSP 90-alpha OS=Homo sapiens OX=9606 GN=HSP90AA1 PE=1 SV=5	5.80696
P07900_K74	HSP90AA1	LDSGK*ELHINLIPNK	HS90A_HUMAN Heat shock protein HSP 90-alpha OS=Homo sapiens OX=9606 GN=HSP90AA1 PE=1 SV=5	7.69231
P07910_K184	HNRNPC	GSSK*SGK	HNRPC_HUMAN Heterogeneous nuclear ribonucleoproteins C1/C2 OS=Homo sapiens OX=9606 GN=HNRNPC PE=1 SV=4	3.04963
P07910_K216	HNRNPC	VDSLLENLEK*IEK	HNRPC_HUMAN Heterogeneous nuclear ribonucleoproteins C1/C2 OS=Homo sapiens OX=9606 GN=HNRNPC PE=1 SV=4	10
P07910_K219	HNRNPC	IEK*EQSK	HNRPC_HUMAN Heterogeneous nuclear ribonucleoproteins C1/C2 OS=Homo sapiens OX=9606 GN=HNRNPC PE=1 SV=4	3.22581
P07910_K223	HNRNPC	EQSK*QAVEMK	HNRPC_HUMAN Heterogeneous nuclear ribonucleoproteins C1/C2 OS=Homo sapiens OX=9606 GN=HNRNPC PE=1 SV=4	10	Cross-link	Note=Glycyl lysine isopeptide (Lys-Gly) (interchain with G-Cter in SUMO2);Ontology_term=ECO:0007744,ECO:0007744;evidence=ECO:0007744|PubMed:25755297,ECO:0007744|PubMed:28112733;Dbxref=PMID:25755297,PMID:28112733
P08133_K102	ANXA6	EIK*DAISGIGTDEK	ANXA6_HUMAN Annexin A6 OS=Homo sapiens OX=9606 GN=ANXA6 PE=1 SV=3	7.69231
P08133_K370	ANXA6	PANDFNPDADAK*ALR	ANXA6_HUMAN Annexin A6 OS=Homo sapiens OX=9606 GN=ANXA6 PE=1 SV=3	0.964985	Modified residue	Note=N6-acetyllysine;Ontology_term=ECO:0007744;evidence=ECO:0007744|PubMed:19608861;Dbxref=PMID:19608861
P08133_K446	ANXA6	K*AMEGAGTDEK	ANXA6_HUMAN Annexin A6 OS=Homo sapiens OX=9606 GN=ANXA6 PE=1 SV=3	5.28177
P08133_K478	ANXA6	AINEAYK*EDYHK	ANXA6_HUMAN Annexin A6 OS=Homo sapiens OX=9606 GN=ANXA6 PE=1 SV=3	7.45127
P08133_K580	ANXA6	K*EMSGDVR	ANXA6_HUMAN Annexin A6 OS=Homo sapiens OX=9606 GN=ANXA6 PE=1 SV=3	6.02124
P08133_K613	ANXA6	SMK*GAGTDEK	ANXA6_HUMAN Annexin A6 OS=Homo sapiens OX=9606 GN=ANXA6 PE=1 SV=3	10
P08133_K647	ANXA6	YDK*SLHQAIEGDTSGDFLK	ANXA6_HUMAN Annexin A6 OS=Homo sapiens OX=9606 GN=ANXA6 PE=1 SV=3	1
P08195_K166	SLC3A2	FTGLSK*EELLK	4F2_HUMAN 4F2 cell-surface antigen heavy chain OS=Homo sapiens OX=9606 GN=SLC3A2 PE=1 SV=3	10	Cross-link	Note=Glycyl lysine isopeptide (Lys-Gly) (interchain with G-Cter in SUMO2);Ontology_term=ECO:0007744;evidence=ECO:0007744|PubMed:25114211;Dbxref=PMID:25114211
P08238_K347	HSP90AB1	APFDLFENK*K	HS90B_HUMAN Heat shock protein HSP 90-beta OS=Homo sapiens OX=9606 GN=HSP90AB1 PE=1 SV=4	8.47902
P08238_K435	HSP90AB1	FYEAFSK*NLK	HS90B_HUMAN Heat shock protein HSP 90-beta OS=Homo sapiens OX=9606 GN=HSP90AB1 PE=1 SV=4	9.52279	Modified residue	Note=N6-acetyllysine;Ontology_term=ECO:0007744;evidence=ECO:0007744|PubMed:19608861;Dbxref=PMID:19608861
P08238_K531	HSP90AB1	EFDGK*SLVSVTK	HS90B_HUMAN Heat shock protein HSP 90-beta OS=Homo sapiens OX=9606 GN=HSP90AB1 PE=1 SV=4	3.47904	Modified residue	Note=N6-methylated lysine%3B alternate;Ontology_term=ECO:0000269;evidence=ECO:0000269|PubMed:24880080;Dbxref=PMID:24880080
P08238_K557	HSP90AB1	MEESK*AK	HS90B_HUMAN Heat shock protein HSP 90-beta OS=Homo sapiens OX=9606 GN=HSP90AB1 PE=1 SV=4	6.51355
P08238_K559	HSP90AB1	AK*FENLCK	HS90B_HUMAN Heat shock protein HSP 90-beta OS=Homo sapiens OX=9606 GN=HSP90AB1 PE=1 SV=4	8.31665
P08238_K568	HSP90AB1	LMK*EILDK	HS90B_HUMAN Heat shock protein HSP 90-beta OS=Homo sapiens OX=9606 GN=HSP90AB1 PE=1 SV=4	10
P08238_K577	HSP90AB1	VEK*VTISNR	HS90B_HUMAN Heat shock protein HSP 90-beta OS=Homo sapiens OX=9606 GN=HSP90AB1 PE=1 SV=4	10	Modified residue	Note=N6-succinyllysine;Ontology_term=ECO:0000250;evidence=ECO:0000250|UniProtKB:P11499
P08238_K624	HSP90AB1	K*HLEINPDHPIVETLR	HS90B_HUMAN Heat shock protein HSP 90-beta OS=Homo sapiens OX=9606 GN=HSP90AB1 PE=1 SV=4	6.58609	Modified residue	Note=N6-acetyllysine;Ontology_term=ECO:0000250;evidence=ECO:0000250|UniProtKB:P11499
P08238_K649	HSP90AB1	AEADKNDK*AVK	HS90B_HUMAN Heat shock protein HSP 90-beta OS=Homo sapiens OX=9606 GN=HSP90AB1 PE=1 SV=4	6.21363
P08238_K69	HSP90AB1	LDSGK*ELK	HS90B_HUMAN Heat shock protein HSP 90-beta OS=Homo sapiens OX=9606 GN=HSP90AB1 PE=1 SV=4	6.16021
P08621_K162	SNRNP70	DMHSAYK*HADGK	RU17_HUMAN U1 small nuclear ribonucleoprotein 70 kDa OS=Homo sapiens OX=9606 GN=SNRNP70 PE=1 SV=2	10
P08670_K104	VIM	TNEK*VELQELNDR	VIME_HUMAN Vimentin OS=Homo sapiens OX=9606 GN=VIM PE=1 SV=4	8.71212	Cross-link	Note=Glycyl lysine isopeptide (Lys-Gly) (interchain with G-Cter in SUMO2);Ontology_term=ECO:0007744;evidence=ECO:0007744|PubMed:28112733;Dbxref=PMID:28112733
P08670_K120	VIM	FANYIDK*VR	VIME_HUMAN Vimentin OS=Homo sapiens OX=9606 GN=VIM PE=1 SV=4	8.37218	Modified residue$Cross-link	Note=N6-acetyllysine%3B alternate;Ontology_term=ECO:0007744;evidence=ECO:0007744|PubMed:19608861;Dbxref=PMID:19608861$Note=Glycyl lysine isopeptide (Lys-Gly) (interchain with G-Cter in SUMO2)%3B alternate;Ontology_term=ECO:0007744;evidence=ECO:0007744|PubMed:28112733;Dbxref=PMID:28112733
P08670_K139	VIM	ILLAELEQLK*GQGK	VIME_HUMAN Vimentin OS=Homo sapiens OX=9606 GN=VIM PE=1 SV=4	10	Modified residue$Cross-link	Note=N6-acetyllysine%3B alternate;Ontology_term=ECO:0007744;evidence=ECO:0007744|PubMed:19608861;Dbxref=PMID:19608861$Note=Glycyl lysine isopeptide (Lys-Gly) (interchain with G-Cter in SUMO2)%3B alternate;Ontology_term=ECO:0007744;evidence=ECO:0007744|PubMed:28112733;Dbxref=PMID:28112733
P08670_K168	VIM	QVDQLTNDK*AR	VIME_HUMAN Vimentin OS=Homo sapiens OX=9606 GN=VIM PE=1 SV=4	10	Modified residue	Note=N6-acetyllysine;Ontology_term=ECO:0000250;evidence=ECO:0000250|UniProtKB:P20152
P08670_K188	VIM	EK*LQEEMLQR	VIME_HUMAN Vimentin OS=Homo sapiens OX=9606 GN=VIM PE=1 SV=4	8.56838	Modified residue	Note=N6-acetyllysine%3B alternate;Ontology_term=ECO:0000250;evidence=ECO:0000250|UniProtKB:P20152
P08670_K223	VIM	K*VESLQEEIAFLK	VIME_HUMAN Vimentin OS=Homo sapiens OX=9606 GN=VIM PE=1 SV=4	10	Modified residue$Cross-link	Note=N6-acetyllysine%3B alternate;Ontology_term=ECO:0000250;evidence=ECO:0000250|UniProtKB:P20152$Note=Glycyl lysine isopeptide (Lys-Gly) (interchain with G-Cter in SUMO2)%3B alternate;Ontology_term=ECO:0007744;evidence=ECO:0007744|PubMed:28112733;Dbxref=PMID:28112733
P08670_K235	VIM	VESLQEEIAFLK*K KVESLQEEIAFLK*K	VIME_HUMAN Vimentin OS=Homo sapiens OX=9606 GN=VIM PE=1 SV=4	10	Modified residue	Note=N6-acetyllysine;Ontology_term=ECO:0000250;evidence=ECO:0000250|UniProtKB:P20152
P08670_K282	VIM	QQYESVAAK*NLQEAEEWYK	VIME_HUMAN Vimentin OS=Homo sapiens OX=9606 GN=VIM PE=1 SV=4	7.16728
P08670_K292	VIM	NLQEAEEWYK*SK	VIME_HUMAN Vimentin OS=Homo sapiens OX=9606 GN=VIM PE=1 SV=4	3.19473
[truncated: 1,644 more rows]

## Sheet: STP alkyne, 1 mM vs 0.1 mM
Identifier	Genename	Modified sequences	Description	STP alkyne_1 vs 0.1 mM	Annotation	Modification
[truncated: 17,904 more rows]
