# Supplementary material for: A Paal–Knorr agent for chemoproteomic profiling of targets of isoketals in cells
Source: Chem Sci. 2021 Oct 15;12(43):14557–63. doi: 10.1039/d1sc02230j (PMC8580055; doi:10.1039/d1sc02230j)
Supplement: SC-012-D1SC02230J-s007 [file SC-012-D1SC02230J-s007.xlsx]

## Sheet: Sheet1
Identifier	Genename	Modified sequences	Description	ONAyne_200µM vs LGs_2µM	P value
Tkt_K314	Tkt	VGDK*IATR	TKT_MOUSE Transketolase OS=Mus musculus OX=10090 GN=Tkt PE=1 SV=1	4.1275	0.396541
Rpl19_K53	Rpl19	K*PVTVHSR	RL19_MOUSE 60S ribosomal protein L19 OS=Mus musculus OX=10090 GN=Rpl19 PE=1 SV=1	3.64
Ube2d3_K128	Ube2d3	IYK*TDR	UB2D3_MOUSE Ubiquitin-conjugating enzyme E2 D3 OS=Mus musculus OX=10090 GN=Ube2d3 PE=1 SV=1	3.61
Rfx4_K148	Rfx4	K*GAAWVSETGK	RFX4_MOUSE Transcription factor RFX4 OS=Mus musculus OX=10090 GN=Rfx4 PE=1 SV=1	3.5
Ptbp1_K47	Ptbp1	FK*GDNR	PTBP1_MOUSE Polypyrimidine tract-binding protein 1 OS=Mus musculus OX=10090 GN=Ptbp1 PE=1 SV=2	3.49	0.367201
Gfpt1_K249	Gfpt1	K*GSCGLSR	GFPT1_MOUSE Glutamine--fructose-6-phosphate aminotransferase [isomerizing] 1 OS=Mus musculus OX=10090 GN=Gfpt1 PE=1 SV=3	3.3
Pmvk_K69	Pmvk	LLDASTYK*ETYR	PMVK_MOUSE Phosphomevalonate kinase OS=Mus musculus OX=10090 GN=Pmvk PE=1 SV=3	2.91
Ttc39b_K443	Ttc39b	IAGK*SLPTEK	TT39B_MOUSE Tetratricopeptide repeat protein 39B OS=Mus musculus OX=10090 GN=Ttc39b PE=1 SV=1	2.87
Tcerg1_K580	Tcerg1	IIQEPPHK*K	TCRG1_MOUSE Transcription elongation regulator 1 OS=Mus musculus OX=10090 GN=Tcerg1 PE=1 SV=2	2.82
Gsdmd_K198	Gsdmd	GEGK*GHQSR	GSDMD_MOUSE Gasdermin-D OS=Mus musculus OX=10090 GN=Gsdmd PE=1 SV=1	2.79
Noc3l_K27	Noc3l	VKLENK*LK	NOC3L_MOUSE Nucleolar complex protein 3 homolog OS=Mus musculus OX=10090 GN=Noc3l PE=2 SV=2	2.78
Ncl_K284	Ncl	KK*EMTK	NUCL_MOUSE Nucleolin OS=Mus musculus OX=10090 GN=Ncl PE=1 SV=2	2.66
Eno1_K71	Eno1	GVSQAVEHINK*TIAPALVSK	ENOA_MOUSE Alpha-enolase OS=Mus musculus OX=10090 GN=Eno1 PE=1 SV=3	2.6425	0.511418
Ttc39b_K44	Ttc39b	SPSDMATSGFHFVPCETK*R	TT39B_MOUSE Tetratricopeptide repeat protein 39B OS=Mus musculus OX=10090 GN=Ttc39b PE=1 SV=1	2.61
Snu13_K86	Snu13	SK*QALGR	NH2L1_MOUSE NHP2-like protein 1 OS=Mus musculus OX=10090 GN=Snu13 PE=1 SV=4	2.605
Pgam1_K106	Pgam1	AETAAK*HGEAQVK	PGAM1_MOUSE Phosphoglycerate mutase 1 OS=Mus musculus OX=10090 GN=Pgam1 PE=1 SV=3	2.565	0.0137865
Larp7_K313	Larp7	AQK*DGVGQAASEVSK	LARP7_MOUSE La-related protein 7 OS=Mus musculus OX=10090 GN=Larp7 PE=1 SV=2	2.55
Diaph1_K1029	Diaph1	FPDELAHVEK*ASR	DIAP1_MOUSE Protein diaphanous homolog 1 OS=Mus musculus OX=10090 GN=Diaph1 PE=1 SV=1	2.53
Zfp36_K115	Zfp36	YGAK*CQFAHGLGELR	TTP_MOUSE mRNA decay activator protein ZFP36 OS=Mus musculus OX=10090 GN=Zfp36 PE=1 SV=1	2.50667	0.375313
Hnrnph1_K349	Hnrnph1	DK*ANMQHR	HNRH1_MOUSE Heterogeneous nuclear ribonucleoprotein H OS=Mus musculus OX=10090 GN=Hnrnph1 PE=1 SV=3	2.5
Akap13_K2654	Akap13	QMDQNLCQVSNK*HGR	AKP13_MOUSE A-kinase anchor protein 13 OS=Mus musculus OX=10090 GN=Akap13 PE=1 SV=1	2.46
Thumpd3_K450	Thumpd3	AVLLTQDK*K	THUM3_MOUSE THUMP domain-containing protein 3 OS=Mus musculus OX=10090 GN=Thumpd3 PE=1 SV=1	2.43
H1-4_K32	H1-4	AAGGAK*R	H14_MOUSE Histone H1.4 OS=Mus musculus OX=10090 GN=H1-4 PE=1 SV=2	2.418	0.0883636
Smc2_K177	Smc2	MYEYK*K	SMC2_MOUSE Structural maintenance of chromosomes protein 2 OS=Mus musculus OX=10090 GN=Smc2 PE=1 SV=2	2.38
Nup35_K83	Nup35	SPLLAGGSPPQPVVPAHK*DK	NUP35_MOUSE Nucleoporin NUP35 OS=Mus musculus OX=10090 GN=Nup35 PE=1 SV=2	2.37
Cybb_K381	Cybb	QEFQDAWK*LPK	CY24B_MOUSE Cytochrome b-245 heavy chain OS=Mus musculus OX=10090 GN=Cybb PE=1 SV=1	2.35
Rnf213_K4059	Rnf213	DASQK*HR	RN213_MOUSE E3 ubiquitin-protein ligase RNF213 OS=Mus musculus OX=10090 GN=Rnf213 PE=1 SV=2	2.34
Pnpla6_K713	Pnpla6	LPEGTLGHIK*R	PLPL6_MOUSE Patatin-like phospholipase domain-containing protein 6 OS=Mus musculus OX=10090 GN=Pnpla6 PE=1 SV=2	2.32
Sbf2_K1842	Sbf2	DIK*TSK	MTMRD_MOUSE Myotubularin-related protein 13 OS=Mus musculus OX=10090 GN=Sbf2 PE=1 SV=1	2.29
Eif3l_K437	Eif3l	FLSPVVPNYDNVHPNYHK*EPFLQQLK	EIF3L_MOUSE Eukaryotic translation initiation factor 3 subunit L OS=Mus musculus OX=10090 GN=Eif3l PE=1 SV=1	2.27
Pgd_K375	Pgd	SVFLGK*IK	6PGD_MOUSE 6-phosphogluconate dehydrogenase, decarboxylating OS=Mus musculus OX=10090 GN=Pgd PE=1 SV=3	2.27
Hmgb1_K3	Hmgb1	GK*GDPK	HMGB1_MOUSE High mobility group protein B1 OS=Mus musculus OX=10090 GN=Hmgb1 PE=1 SV=2	2.27	0.225649
Ilkap_K373	Ilkap	LANK*AVQR	ILKAP_MOUSE Integrin-linked kinase-associated serine/threonine phosphatase 2C OS=Mus musculus OX=10090 GN=Ilkap PE=1 SV=1	2.265	0.546556
Fh_K260	Fh	IK*AAMPR	FUMH_MOUSE Fumarate hydratase, mitochondrial OS=Mus musculus OX=10090 GN=Fh PE=1 SV=3	2.25
Lrrc59_K207	Lrrc59	EYDAQK*ASK	LRC59_MOUSE Leucine-rich repeat-containing protein 59 OS=Mus musculus OX=10090 GN=Lrrc59 PE=1 SV=1	2.25
Aldoa_K317	Aldoa	AWGGK*K	ALDOA_MOUSE Fructose-bisphosphate aldolase A OS=Mus musculus OX=10090 GN=Aldoa PE=1 SV=2	2.24
Dnajc7_K254	Dnajc7	NAK*ALK	DNJC7_MOUSE DnaJ homolog subfamily C member 7 OS=Mus musculus OX=10090 GN=Dnajc7 PE=1 SV=2	2.23
Sdha_K182	Sdha	FGK*GGQAHR	SDHA_MOUSE Succinate dehydrogenase [ubiquinone] flavoprotein subunit, mitochondrial OS=Mus musculus OX=10090 GN=Sdha PE=1 SV=1	2.225	0.424772
Vbp1_K58	Vbp1	KLDEQYQK*YK	PFD3_MOUSE Prefoldin subunit 3 OS=Mus musculus OX=10090 GN=Vbp1 PE=1 SV=2	2.19
Ddx24_K60	Ddx24	LVK*NPSR	DDX24_MOUSE ATP-dependent RNA helicase DDX24 OS=Mus musculus OX=10090 GN=Ddx24 PE=1 SV=2	2.18333	0.00851496
Bop1_K174	Bop1	TVQDK*MTGR	BOP1_MOUSE Ribosome biogenesis protein BOP1 OS=Mus musculus OX=10090 GN=Bop1 PE=1 SV=1	2.1775	0.215206
Sars1_K123	Sars1	VK*LEAER	SYSC_MOUSE Serine--tRNA ligase, cytoplasmic OS=Mus musculus OX=10090 GN=Sars1 PE=1 SV=3	2.16
Snx15_K321	Snx15	K*AAEYLK	SNX15_MOUSE Sorting nexin-15 OS=Mus musculus OX=10090 GN=Snx15 PE=1 SV=1	2.15
Myl12b_K164	Myl12b	ILK*HGAK	ML12B_MOUSE Myosin regulatory light chain 12B OS=Mus musculus OX=10090 GN=Myl12b PE=1 SV=2	2.14
Golga5_K440	Golga5	ILQSK*EK	GOGA5_MOUSE Golgin subfamily A member 5 OS=Mus musculus OX=10090 GN=Golga5 PE=1 SV=2	2.14
Mia3_K1624	Mia3	K*AHDNWLK	TGO1_MOUSE Transport and Golgi organization protein 1 homolog OS=Mus musculus OX=10090 GN=Mia3 PE=1 SV=2	2.11
Hspa8_K325	Hspa8	DAK*LDK	HSP7C_MOUSE Heat shock cognate 71 kDa protein OS=Mus musculus OX=10090 GN=Hspa8 PE=1 SV=1	2.1	0.390355
Hsp90b1_K137	Hsp90b1	IK*CDKEK	ENPL_MOUSE Endoplasmin OS=Mus musculus OX=10090 GN=Hsp90b1 PE=1 SV=2	2.09
Gnai3_K32	Gnai3	AAK*EVK	GNAI3_MOUSE Guanine nucleotide-binding protein G(i) subunit alpha-3 OS=Mus musculus OX=10090 GN=Gnai3 PE=1 SV=3	2.075
Eif4g2_K49	Eif4g2	TPGQNAQK*WIPAR	IF4G2_MOUSE Eukaryotic translation initiation factor 4 gamma 2 OS=Mus musculus OX=10090 GN=Eif4g2 PE=1 SV=2	2.07
Mtdh_K480	Mtdh	ARPK*QEK	LYRIC_MOUSE Protein LYRIC OS=Mus musculus OX=10090 GN=Mtdh PE=1 SV=1	2.07
S100a4_K31	S100a4	LNK*TELK	S10A4_MOUSE Protein S100-A4 OS=Mus musculus OX=10090 GN=S100a4 PE=1 SV=1	2.05687	0.0592841
Ubap2l_K884	Ubap2l	DGSLASNPYSGDLTK*FGR	UBP2L_MOUSE Ubiquitin-associated protein 2-like OS=Mus musculus OX=10090 GN=Ubap2l PE=1 SV=1	2.05
S100a11_K50	S100a11	NQK*DPGVLDR	S10AB_MOUSE Protein S100-A11 OS=Mus musculus OX=10090 GN=S100a11 PE=1 SV=1	2.04812	0.0703493
Ncf2_K158	Ncf2	HSK*IDK	NCF2_MOUSE Neutrophil cytosol factor 2 OS=Mus musculus OX=10090 GN=Ncf2 PE=1 SV=1	2.045
Rrbp1_K722	Rrbp1	K*GDGNPNQGK	RRBP1_MOUSE Ribosome-binding protein 1 OS=Mus musculus OX=10090 GN=Rrbp1 PE=1 SV=2	2.04
Arcn1_K164	Arcn1	AK*ELQQAR	COPD_MOUSE Coatomer subunit delta OS=Mus musculus OX=10090 GN=Arcn1 PE=1 SV=2	2.01
Cacybp_K21	Cacybp	VLLEK*STR	CYBP_MOUSE Calcyclin-binding protein OS=Mus musculus OX=10090 GN=Cacybp PE=1 SV=1	2.01	0.136736
Ddx20_K519	Ddx20	LPVK*SHSECGVLEK	DDX20_MOUSE Probable ATP-dependent RNA helicase DDX20 OS=Mus musculus OX=10090 GN=Ddx20 PE=1 SV=2	1.995	0.235035
Inpp5d_K213	Inpp5d	TGSSNLPHLK*K	SHIP1_MOUSE Phosphatidylinositol 3,4,5-trisphosphate 5-phosphatase 1 OS=Mus musculus OX=10090 GN=Inpp5d PE=1 SV=2	1.995	0.396675
Pik3ap1_K482	Pik3ap1	PTK*DSMIR	BCAP_MOUSE Phosphoinositide 3-kinase adapter protein 1 OS=Mus musculus OX=10090 GN=Pik3ap1 PE=1 SV=1	1.99
Hnrnpl_K415	Hnrnpl	SK*PGAAMVEMADGYAVDR	HNRPL_MOUSE Heterogeneous nuclear ribonucleoprotein L OS=Mus musculus OX=10090 GN=Hnrnpl PE=1 SV=2	1.96
Ppia_K44	Ppia	ALSTGEK*GFGYK LSTGEK*GFGYK	PPIA_MOUSE Peptidyl-prolyl cis-trans isomerase A OS=Mus musculus OX=10090 GN=Ppia PE=1 SV=2	1.96	0.0606252
Rsl24d1_K128	Rsl24d1	EVK*QNIHLIR	RLP24_MOUSE Probable ribosome biogenesis protein RLP24 OS=Mus musculus OX=10090 GN=Rsl24d1 PE=2 SV=1	1.95
Xpo1_K594	Xpo1	IAQK*CR	XPO1_MOUSE Exportin-1 OS=Mus musculus OX=10090 GN=Xpo1 PE=1 SV=1	1.94375	0.0624735
Specc1_K231	Specc1	TLEEK*NK	CYTSB_MOUSE Cytospin-B OS=Mus musculus OX=10090 GN=Specc1 PE=1 SV=2	1.94
Acly_K722	Acly	GIK*EGR	ACLY_MOUSE ATP-citrate synthase OS=Mus musculus OX=10090 GN=Acly PE=1 SV=1	1.94	0.436918
Niban2_K322	Niban2	EHLASK*IR	NIBA2_MOUSE Protein Niban 2 OS=Mus musculus OX=10090 GN=Niban2 PE=1 SV=2	1.935
Cfl1_K19	Cfl1	VFNDMK*VR FNDMK*VR	COF1_MOUSE Cofilin-1 OS=Mus musculus OX=10090 GN=Cfl1 PE=1 SV=3	1.93312	0.0252857
Zfp36_K141	Zfp36	TELCHK*FYLQGR	TTP_MOUSE mRNA decay activator protein ZFP36 OS=Mus musculus OX=10090 GN=Zfp36 PE=1 SV=1	1.93	4.27509387321804E 23
Rbm28_K731	Rbm28	QK*LLGPSK	RBM28_MOUSE RNA-binding protein 28 OS=Mus musculus OX=10090 GN=Rbm28 PE=1 SV=4	1.92
Eef2_K333	Eef2	LDSEDKDKEGK*PLLK	EF2_MOUSE Elongation factor 2 OS=Mus musculus OX=10090 GN=Eef2 PE=1 SV=2	1.915	0.0173771
Mybbp1a_K935	Mybbp1a	VLK*GNTNK	MBB1A_MOUSE Myb-binding protein 1A OS=Mus musculus OX=10090 GN=Mybbp1a PE=1 SV=2	1.91333	0.1589
Myh9_K1918	Myh9	EVSSLK*NK	MYH9_MOUSE Myosin-9 OS=Mus musculus OX=10090 GN=Myh9 PE=1 SV=4	1.90714	0.0961543
Numa1_K1606	Numa1	THYDAK*K	NUMA1_MOUSE Nuclear mitotic apparatus protein 1 OS=Mus musculus OX=10090 GN=Numa1 PE=1 SV=1	1.9
Tardbp_K140	Tardbp	DLK*TGHSK	TADBP_MOUSE TAR DNA-binding protein 43 OS=Mus musculus OX=10090 GN=Tardbp PE=1 SV=1	1.9
Vac14_K27	Vac14	K*VAALEIEK	VAC14_MOUSE Protein VAC14 homolog OS=Mus musculus OX=10090 GN=Vac14 PE=1 SV=1	1.9
Pik3ap1_K382	Pik3ap1	HGHYPNTIAEK*HGFR	BCAP_MOUSE Phosphoinositide 3-kinase adapter protein 1 OS=Mus musculus OX=10090 GN=Pik3ap1 PE=1 SV=1	1.9	0.236117
Zfpl1_K234	Zfpl1	TAGIHGDCDDDK*YR	ZFPL1_MOUSE Zinc finger protein-like 1 OS=Mus musculus OX=10090 GN=Zfpl1 PE=1 SV=1	1.9	0.513837
Ncf2_K68	Ncf2	DK*HSAVAYFQR	NCF2_MOUSE Neutrophil cytosol factor 2 OS=Mus musculus OX=10090 GN=Ncf2 PE=1 SV=1	1.8975	0.498222
Dnajc9_K165	Dnajc9	NIIQK*AIESK	DNJC9_MOUSE DnaJ homolog subfamily C member 9 OS=Mus musculus OX=10090 GN=Dnajc9 PE=1 SV=2	1.8925	0.386436
Sugp1_K265	Sugp1	NLAEK*LAR	SUGP1_MOUSE SURP and G-patch domain-containing protein 1 OS=Mus musculus OX=10090 GN=Sugp1 PE=1 SV=1	1.89	0.0785568
Abce1_K191	Abce1	GTVGSILDRK*DETK	ABCE1_MOUSE ATP-binding cassette sub-family E member 1 OS=Mus musculus OX=10090 GN=Abce1 PE=1 SV=1	1.89
Il16_K1251	Il16	GSLHGDK*PLTINR	IL16_MOUSE Pro-interleukin-16 OS=Mus musculus OX=10090 GN=Il16 PE=1 SV=3	1.885	0.510609
Psmc1_K98	Psmc1	SK*VDDLR	PRS4_MOUSE 26S proteasome regulatory subunit 4 OS=Mus musculus OX=10090 GN=Psmc1 PE=1 SV=1	1.88
Gigyf2_K516	Gigyf2	LTSK*LQEHR	GGYF2_MOUSE GRB10-interacting GYF protein 2 OS=Mus musculus OX=10090 GN=Gigyf2 PE=1 SV=2	1.86
Bcap31_K148	Bcap31	QAESASEAAK*K	BAP31_MOUSE B-cell receptor-associated protein 31 OS=Mus musculus OX=10090 GN=Bcap31 PE=1 SV=4	1.86
Hnrnpc_K170	Hnrnpc	GK*SGFNSK	HNRPC_MOUSE Heterogeneous nuclear ribonucleoproteins C1/C2 OS=Mus musculus OX=10090 GN=Hnrnpc PE=1 SV=1	1.855	0.322829
Tacc3_K567	Tacc3	IHAEEK*LR	TACC3_MOUSE Transforming acidic coiled-coil-containing protein 3 OS=Mus musculus OX=10090 GN=Tacc3 PE=1 SV=1	1.85
Gcn1_K1338	Gcn1	VK*PIVAK	GCN1_MOUSE eIF-2-alpha kinase activator GCN1 OS=Mus musculus OX=10090 GN=Gcn1 PE=1 SV=1	1.85
Cct3_K354	Cct3	IVSRPEELREDDVGTGAGLLEIKK*	TCPG_MOUSE T-complex protein 1 subunit gamma OS=Mus musculus OX=10090 GN=Cct3 PE=1 SV=1	1.85
Junb_K281	Junb	LAATK*CR	JUNB_MOUSE Transcription factor jun-B OS=Mus musculus OX=10090 GN=Junb PE=1 SV=1	1.85
Flna_K578	Flna	VGTECGNQK*VR	FLNA_MOUSE Filamin-A OS=Mus musculus OX=10090 GN=Flna PE=1 SV=5	1.84833	0.228695
Tln1_K2099	Tln1	ALGDLISATK*AAAGK	TLN1_MOUSE Talin-1 OS=Mus musculus OX=10090 GN=Tln1 PE=1 SV=2	1.84429	0.0856687
Nub1_K449	Nub1	GMGYSTQAAK*QALHQAR	NUB1_MOUSE NEDD8 ultimate buster 1 OS=Mus musculus OX=10090 GN=Nub1 PE=1 SV=2	1.84
Pgrmc1_K102	Pgrmc1	VFDVTK*GR	PGRC1_MOUSE Membrane-associated progesterone receptor component 1 OS=Mus musculus OX=10090 GN=Pgrmc1 PE=1 SV=4	1.84
Hcls1_K170	Hcls1	DK*AALGYDYK	HCLS1_MOUSE Hematopoietic lineage cell-specific protein OS=Mus musculus OX=10090 GN=Hcls1 PE=1 SV=2	1.84
Tmpo_K267	Tmpo	GQTHK*LAPGR	LAP2A_MOUSE Lamina-associated polypeptide 2, isoforms alpha/zeta OS=Mus musculus OX=10090 GN=Tmpo PE=1 SV=4	1.84	0.170142
Hspa8_K497	Hspa8	STGK*ENK	HSP7C_MOUSE Heat shock cognate 71 kDa protein OS=Mus musculus OX=10090 GN=Hspa8 PE=1 SV=1	1.83875	0.136011
Tpm3_K249	Tpm3	SVAK*LEK	TPM3_MOUSE Tropomyosin alpha-3 chain OS=Mus musculus OX=10090 GN=Tpm3 PE=1 SV=3	1.8375	0.126852
Atp5if1_K72	Atp5if1	K*HHEDEIDHHSK	ATIF1_MOUSE ATPase inhibitor, mitochondrial OS=Mus musculus OX=10090 GN=Atp5if1 PE=1 SV=2	1.83
Ccdc126_K99	Ccdc126	LVK*LESK	CC126_MOUSE Coiled-coil domain-containing protein 126 OS=Mus musculus OX=10090 GN=Ccdc126 PE=2 SV=1	1.83	0.304305
Hectd1_K467	Hectd1	TPLDK*AR	HECD1_MOUSE E3 ubiquitin-protein ligase HECTD1 OS=Mus musculus OX=10090 GN=Hectd1 PE=1 SV=2	1.83	0.0743477
Rbm39_K322	Rbm39	PMK*VGHVTER	RBM39_MOUSE RNA-binding protein 39 OS=Mus musculus OX=10090 GN=Rbm39 PE=1 SV=2	1.805	0.22805
Pck2_K489	Pck2	SESTAAAEHK*GK	PCKGM_MOUSE Phosphoenolpyruvate carboxykinase [GTP], mitochondrial OS=Mus musculus OX=10090 GN=Pck2 PE=1 SV=1	1.805	0.296747
Larp1_K342	Larp1	K*FDGTEGPR	LARP1_MOUSE La-related protein 1 OS=Mus musculus OX=10090 GN=Larp1 PE=1 SV=3	1.8
Tln1_K1415	Tln1	VLGEAMTGISQNAK*NGNLPEFGDAIATASK	TLN1_MOUSE Talin-1 OS=Mus musculus OX=10090 GN=Tln1 PE=1 SV=2	1.8
Pgam1_K39	Pgam1	FSGWYDADLSPAGHEEAK*R	PGAM1_MOUSE Phosphoglycerate mutase 1 OS=Mus musculus OX=10090 GN=Pgam1 PE=1 SV=3	1.79
Nipsnap1_K56	Nipsnap1	K*DAHSTLLSK	NIPS1_MOUSE Protein NipSnap homolog 1 OS=Mus musculus OX=10090 GN=Nipsnap1 PE=1 SV=1	1.79
Wdr1_K569	Wdr1	VK*IQDAHR	WDR1_MOUSE WD repeat-containing protein 1 OS=Mus musculus OX=10090 GN=Wdr1 PE=1 SV=3	1.79
Ptpn6_K356	Ptpn6	EVEK*GR	PTN6_MOUSE Tyrosine-protein phosphatase non-receptor type 6 OS=Mus musculus OX=10090 GN=Ptpn6 PE=1 SV=2	1.78875	0.14423
Aars1_K780	Aars1	SLSAMEAK*VK	SYAC_MOUSE Alanine--tRNA ligase, cytoplasmic OS=Mus musculus OX=10090 GN=Aars1 PE=1 SV=1	1.78
Dync1li2_K50	Dync1li2	SK*LPSGK	DC1L2_MOUSE Cytoplasmic dynein 1 light intermediate chain 2 OS=Mus musculus OX=10090 GN=Dync1li2 PE=1 SV=2	1.78
Cct4_K21	Cct4	GK*SAYQDR	TCPD_MOUSE T-complex protein 1 subunit delta OS=Mus musculus OX=10090 GN=Cct4 PE=1 SV=3	1.77667	0.148006
Ube2n_K92	Ube2n	ICLDILK*DK	UBE2N_MOUSE Ubiquitin-conjugating enzyme E2 N OS=Mus musculus OX=10090 GN=Ube2n PE=1 SV=1	1.76833	0.28691
Myh9_K1246	Myh9	GDSEHK*R	MYH9_MOUSE Myosin-9 OS=Mus musculus OX=10090 GN=Myh9 PE=1 SV=4	1.76	0.273937
Flna_K700	Flna	TGVAVNKPAEFTVDAK*HAGK	FLNA_MOUSE Filamin-A OS=Mus musculus OX=10090 GN=Flna PE=1 SV=5	1.755	0.570858
Cltb_K207	Cltb	SSK*QCK	CLCB_MOUSE Clathrin light chain B OS=Mus musculus OX=10090 GN=Cltb PE=1 SV=1	1.75333	0.164919
Mat2a_K88	Mat2a	EAIK*HIGYDDSSK	METK2_MOUSE S-adenosylmethionine synthase isoform type-2 OS=Mus musculus OX=10090 GN=Mat2a PE=1 SV=2	1.75
Prrc2c_K485	Prrc2c	AACAEK*LK	PRC2C_MOUSE Protein PRRC2C OS=Mus musculus OX=10090 GN=Prrc2c PE=1 SV=3	1.75	0.124417
Vav1_K555	Vav1	APAHK*ECLGR	VAV_MOUSE Proto-oncogene vav OS=Mus musculus OX=10090 GN=Vav1 PE=1 SV=1	1.749	0.393381
Sfpq_K203	Sfpq	GGK*MPGGPK	SFPQ_MOUSE Splicing factor, proline- and glutamine-rich OS=Mus musculus OX=10090 GN=Sfpq PE=1 SV=1	1.74
Usp25_K751	Usp25	SDLSK*HWK	UBP25_MOUSE Ubiquitin carboxyl-terminal hydrolase 25 OS=Mus musculus OX=10090 GN=Usp25 PE=1 SV=2	1.74
Hdlbp_K168	Hdlbp	FVIGK*NGEK	VIGLN_MOUSE Vigilin OS=Mus musculus OX=10090 GN=Hdlbp PE=1 SV=1	1.74
Tln1_K1530	Tln1	QFVQSAK*EVANSTANLVK	TLN1_MOUSE Talin-1 OS=Mus musculus OX=10090 GN=Tln1 PE=1 SV=2	1.74
Lonp1_K377	Lonp1	IK*QTHR	LONM_MOUSE Lon protease homolog, mitochondrial OS=Mus musculus OX=10090 GN=Lonp1 PE=1 SV=2	1.74	0.55842
H1-2_K160	H1-2	K*PAAAAVTK	H12_MOUSE Histone H1.2 OS=Mus musculus OX=10090 GN=H1-2 PE=1 SV=2	1.74	0.252552
Scp2_K132	Scp2	GSIGTK*FSDR	SCP2_MOUSE Sterol carrier protein 2 OS=Mus musculus OX=10090 GN=Scp2 PE=1 SV=3	1.735
Ppia_K125	Ppia	TEWLDGK*HVVFGK	PPIA_MOUSE Peptidyl-prolyl cis-trans isomerase A OS=Mus musculus OX=10090 GN=Ppia PE=1 SV=2	1.73313	0.0963951
Gstp1_K128	Gstp1	ALPGHLK*PFETLLSQNQGGK	GSTP1_MOUSE Glutathione S-transferase P 1 OS=Mus musculus OX=10090 GN=Gstp1 PE=1 SV=2	1.73
Iscu_K55	Iscu	NVGSLDK*TSK	ISCU_MOUSE Iron-sulfur cluster assembly enzyme ISCU, mitochondrial OS=Mus musculus OX=10090 GN=Iscu PE=1 SV=1	1.73
Gars1_K474	Gars1	VPLVAEK*PLKEPKTVNVVQFEPNK	GARS_MOUSE Glycine--tRNA ligase OS=Mus musculus OX=10090 GN=Gars1 PE=1 SV=1	1.73
Paics_K79	Paics	TAFTK*K	PUR6_MOUSE Multifunctional protein ADE2 OS=Mus musculus OX=10090 GN=Paics PE=1 SV=4	1.72857	0.0811604
Pgam1_K100	Pgam1	HYGGLTGLNK*AETAAK	PGAM1_MOUSE Phosphoglycerate mutase 1 OS=Mus musculus OX=10090 GN=Pgam1 PE=1 SV=3	1.72562	0.0232724
Prpf38b_K106	Prpf38b	K*TAGQTGMCGGVR	PR38B_MOUSE Pre-mRNA-splicing factor 38B OS=Mus musculus OX=10090 GN=Prpf38b PE=1 SV=1	1.7175	0.370737
Txn_K3	Txn	VK*LIESK	THIO_MOUSE Thioredoxin OS=Mus musculus OX=10090 GN=Txn PE=1 SV=3	1.71714	0.000363463
Sec23b_K320	Sec23b	SWHDIEK*DNAR	SC23B_MOUSE Protein transport protein Sec23B OS=Mus musculus OX=10090 GN=Sec23b PE=1 SV=1	1.717	0.0887152
Slc25a1_K255	Slc25a1	MQGLEAHK*YR	TXTP_MOUSE Tricarboxylate transport protein, mitochondrial OS=Mus musculus OX=10090 GN=Slc25a1 PE=1 SV=1	1.715	0.495517
Rbm17_K256	Rbm17	EGQGLGK*HEQGLSTALSVEK	SPF45_MOUSE Splicing factor 45 OS=Mus musculus OX=10090 GN=Rbm17 PE=1 SV=1	1.71
Lpxn_K368	Lpxn	GIFK*EQNNK	LPXN_MOUSE Leupaxin OS=Mus musculus OX=10090 GN=Lpxn PE=1 SV=2	1.705	0.440949
Hspd1_K202	Hspd1	KGVITVK*DGK GVITVK*DGK	CH60_MOUSE 60 kDa heat shock protein, mitochondrial OS=Mus musculus OX=10090 GN=Hspd1 PE=1 SV=1	1.70125	0.109851
Pdia6_K67	Pdia6	K*AATALK	PDIA6_MOUSE Protein disulfide-isomerase A6 OS=Mus musculus OX=10090 GN=Pdia6 PE=1 SV=3	1.7
Hsp90ab1_K568	Hsp90ab1	LMK*EILDK	HS90B_MOUSE Heat shock protein HSP 90-beta OS=Mus musculus OX=10090 GN=Hsp90ab1 PE=1 SV=3	1.69875	0.195443
Hspa8_K526	Hspa8	YK*AEDEKQR	HSP7C_MOUSE Heat shock cognate 71 kDa protein OS=Mus musculus OX=10090 GN=Hspa8 PE=1 SV=1	1.69667	0.245733
Arhgdia_K178	Arhgdia	GSYNIK*SR	GDIR1_MOUSE Rho GDP-dissociation inhibitor 1 OS=Mus musculus OX=10090 GN=Arhgdia PE=1 SV=3	1.69125	0.0171255
Adcy8_K1162	Adcy8	GISEQEGK*IK	ADCY8_MOUSE Adenylate cyclase type 8 OS=Mus musculus OX=10090 GN=Adcy8 PE=1 SV=2	1.69
Atp5po_K97	Atp5po	SLNDITK*R	ATPO_MOUSE ATP synthase subunit O, mitochondrial OS=Mus musculus OX=10090 GN=Atp5po PE=1 SV=1	1.69
Dtymk_K189	Dtymk	SIEEVHK*EIR	KTHY_MOUSE Thymidylate kinase OS=Mus musculus OX=10090 GN=Dtymk PE=1 SV=2	1.69
Hspa9_K135	Hspa9	RYDDPEVQK*DTK	GRP75_MOUSE Stress-70 protein, mitochondrial OS=Mus musculus OX=10090 GN=Hspa9 PE=1 SV=3	1.69	0.429765
Inpp5d_K855	Inpp5d	GEIK*LQTSQGK	SHIP1_MOUSE Phosphatidylinositol 3,4,5-trisphosphate 5-phosphatase 1 OS=Mus musculus OX=10090 GN=Inpp5d PE=1 SV=2	1.685	0.480859
Tbrg4_K617	Tbrg4	SAYLK*DK	FAKD4_MOUSE FAST kinase domain-containing protein 4 OS=Mus musculus OX=10090 GN=Tbrg4 PE=1 SV=1	1.68	0.522566
Snrpb2_K111	Snrpb2	AK*TMEQAAAAANK	RU2B_MOUSE U2 small nuclear ribonucleoprotein B'' OS=Mus musculus OX=10090 GN=Snrpb2 PE=1 SV=1	1.68
Tln1_K278	Tln1	K*IFQAHK	TLN1_MOUSE Talin-1 OS=Mus musculus OX=10090 GN=Tln1 PE=1 SV=2	1.68
Adsl_K82	Adsl	SNLNNIDFQMAAEEEK*R	PUR8_MOUSE Adenylosuccinate lyase OS=Mus musculus OX=10090 GN=Adsl PE=1 SV=2	1.68
Ikzf3_K220	Ikzf3	SSLEEHK*ER	IKZF3_MOUSE Zinc finger protein Aiolos OS=Mus musculus OX=10090 GN=Ikzf3 PE=1 SV=2	1.67625	0.301679
Atad3_K213	Atad3	LK*AAEHR	ATAD3_MOUSE ATPase family AAA domain-containing protein 3 OS=Mus musculus OX=10090 GN=Atad3 PE=1 SV=1	1.67
Dkc1_K400	Dkc1	QGLLDK*HGKPTDNTPATWK	DKC1_MOUSE H/ACA ribonucleoprotein complex subunit DKC1 OS=Mus musculus OX=10090 GN=Dkc1 PE=1 SV=4	1.67	0.464946
Hspa8_K507	Hspa8	ITITNDK*GR	HSP7C_MOUSE Heat shock cognate 71 kDa protein OS=Mus musculus OX=10090 GN=Hspa8 PE=1 SV=1	1.67	0.472768
Nup88_K598	Nup88	VK*LLCDQK	NUP88_MOUSE Nuclear pore complex protein Nup88 OS=Mus musculus OX=10090 GN=Nup88 PE=1 SV=1	1.66	0.148788
Ppia_K31	Ppia	VSFELFADKVPK*TAENFR	PPIA_MOUSE Peptidyl-prolyl cis-trans isomerase A OS=Mus musculus OX=10090 GN=Ppia PE=1 SV=2	1.66	0.198635
Bcat1_K28	Bcat1	AK*DLIITPATVLK	BCAT1_MOUSE Branched-chain-amino-acid aminotransferase, cytosolic OS=Mus musculus OX=10090 GN=Bcat1 PE=1 SV=2	1.66
Hnrnpm_K133	Hnrnpm	AAEVLNK*HSLSGR	HNRPM_MOUSE Heterogeneous nuclear ribonucleoprotein M OS=Mus musculus OX=10090 GN=Hnrnpm PE=1 SV=3	1.66	0.327984
Aldh18a1_K424	Aldh18a1	LASPLLK*R	P5CS_MOUSE Delta-1-pyrroline-5-carboxylate synthase OS=Mus musculus OX=10090 GN=Aldh18a1 PE=1 SV=2	1.66	0.102576
Ppia_K28	Ppia	FELFADK*VPK VSFELFADK*VPK	PPIA_MOUSE Peptidyl-prolyl cis-trans isomerase A OS=Mus musculus OX=10090 GN=Ppia PE=1 SV=2	1.65857	0.199738
Srsf3_K85	Srsf3	VELSNGEK*R	SRSF3_MOUSE Serine/arginine-rich splicing factor 3 OS=Mus musculus OX=10090 GN=Srsf3 PE=1 SV=1	1.65286	0.122229
Cacybp_K49	Cacybp	MQQK*SQK	CYBP_MOUSE Calcyclin-binding protein OS=Mus musculus OX=10090 GN=Cacybp PE=1 SV=1	1.6525	0.0994648
Cdk1_K279	Cdk1	ISGK*MALK	CDK1_MOUSE Cyclin-dependent kinase 1 OS=Mus musculus OX=10090 GN=Cdk1 PE=1 SV=3	1.65
Tln1_K2021	Tln1	EGILK*TAK	TLN1_MOUSE Talin-1 OS=Mus musculus OX=10090 GN=Tln1 PE=1 SV=2	1.65
Slc25a4_K166	Slc25a4	IFK*SDGLK	ADT1_MOUSE ADP/ATP translocase 1 OS=Mus musculus OX=10090 GN=Slc25a4 PE=1 SV=4	1.65
Inpp5d_K27	Inpp5d	AGK*DGSFLVR	SHIP1_MOUSE Phosphatidylinositol 3,4,5-trisphosphate 5-phosphatase 1 OS=Mus musculus OX=10090 GN=Inpp5d PE=1 SV=2	1.64667	0.244038
Ddx5_K501	Ddx5	YSAGK*R	DDX5_MOUSE Probable ATP-dependent RNA helicase DDX5 OS=Mus musculus OX=10090 GN=Ddx5 PE=1 SV=2	1.645	0.25657
Etfb_K110	Etfb	VLAK*LAEK	ETFB_MOUSE Electron transfer flavoprotein subunit beta OS=Mus musculus OX=10090 GN=Etfb PE=1 SV=3	1.64
Rps9_K139	Rps9	K*QVVNIPSFIVR	RS9_MOUSE 40S ribosomal protein S9 OS=Mus musculus OX=10090 GN=Rps9 PE=1 SV=3	1.64
Mdh2_K239	Mdh2	IQEAGTEVVK*AK	MDHM_MOUSE Malate dehydrogenase, mitochondrial OS=Mus musculus OX=10090 GN=Mdh2 PE=1 SV=3	1.63833	0.0367215
S100a6_K35	S100a6	ELK*ELIQK	S10A6_MOUSE Protein S100-A6 OS=Mus musculus OX=10090 GN=S100a6 PE=1 SV=3	1.637	0.132894
Vapa_K205	Vapa	K*VAHSDKPGSTSAVSFR	VAPA_MOUSE Vesicle-associated membrane protein-associated protein A OS=Mus musculus OX=10090 GN=Vapa PE=1 SV=2	1.635	0.667952
Impdh2_K134	Impdh2	DVFEAK*AR	IMDH2_MOUSE Inosine-5'-monophosphate dehydrogenase 2 OS=Mus musculus OX=10090 GN=Impdh2 PE=1 SV=2	1.635	0.0723438
Anxa7_K243	Anxa7	K*AMQGAGTQER	ANXA7_MOUSE Annexin A7 OS=Mus musculus OX=10090 GN=Anxa7 PE=1 SV=2	1.635	0.276867
Tufm_K88	Tufm	ILAEGGGAK*FK	EFTU_MOUSE Elongation factor Tu, mitochondrial OS=Mus musculus OX=10090 GN=Tufm PE=1 SV=1	1.63333	0.240158
Mcmbp_K204	Mcmbp	QAGGLGGLHWCGEPK*R	MCMBP_MOUSE Mini-chromosome maintenance complex-binding protein OS=Mus musculus OX=10090 GN=Mcmbp PE=1 SV=1	1.63333	0.322008
Hnrnpu_K658	Hnrnpu	K*QNTGSK	HNRPU_MOUSE Heterogeneous nuclear ribonucleoprotein U OS=Mus musculus OX=10090 GN=Hnrnpu PE=1 SV=1	1.6325	0.0921413
Clic1_K135	Clic1	GLLK*ALK	CLIC1_MOUSE Chloride intracellular channel protein 1 OS=Mus musculus OX=10090 GN=Clic1 PE=1 SV=3	1.631	0.175479
Hspd1_K130	Hspd1	EGFEK*ISK	CH60_MOUSE 60 kDa heat shock protein, mitochondrial OS=Mus musculus OX=10090 GN=Hspd1 PE=1 SV=1	1.63071	0.0277252
Ttn_K12762	Ttn	KVEK*AK	TITIN_MOUSE Titin OS=Mus musculus OX=10090 GN=Ttn PE=1 SV=1	1.63	0.112382
Nhsl1_K110	Nhsl1	QAK*LNLK	NHSL1_MOUSE NHS-like protein 1 OS=Mus musculus OX=10090 GN=Nhsl1 PE=1 SV=3	1.63
Mbd4_K88	Mbd4	LSGK*TAGK	MBD4_MOUSE Methyl-CpG-binding domain protein 4 OS=Mus musculus OX=10090 GN=Mbd4 PE=1 SV=1	1.63
Eno1_K330	Eno1	IAK*AASEK	ENOA_MOUSE Alpha-enolase OS=Mus musculus OX=10090 GN=Eno1 PE=1 SV=3	1.62625	0.0995208
Glud1_K187	Glud1	AGVK*INPK	DHE3_MOUSE Glutamate dehydrogenase 1, mitochondrial OS=Mus musculus OX=10090 GN=Glud1 PE=1 SV=1	1.626	0.297208
Eno1_K80	Eno1	TIAPALVSK*K	ENOA_MOUSE Alpha-enolase OS=Mus musculus OX=10090 GN=Eno1 PE=1 SV=3	1.6225	0.0566676
Atp6v1e1_K138	Atp6v1e1	K*QDFPLVK	VATE1_MOUSE V-type proton ATPase subunit E 1 OS=Mus musculus OX=10090 GN=Atp6v1e1 PE=1 SV=2	1.62167	0.239609
Mboat7_K456	Mboat7	K*TPSQATSSQAK	MBOA7_MOUSE Lysophospholipid acyltransferase 7 OS=Mus musculus OX=10090 GN=Mboat7 PE=1 SV=1	1.62
Hspa4_K253	Hspa4	YK*LDIK	HSP74_MOUSE Heat shock 70 kDa protein 4 OS=Mus musculus OX=10090 GN=Hspa4 PE=1 SV=1	1.62
Hnrnpab_K76	Hnrnpab	NEEDAGK*MFVGGLSWDTSKK	ROAA_MOUSE Heterogeneous nuclear ribonucleoprotein A/B OS=Mus musculus OX=10090 GN=Hnrnpab PE=1 SV=1	1.62
Nono_K98	Nono	LFEK*YGK	NONO_MOUSE Non-POU domain-containing octamer-binding protein OS=Mus musculus OX=10090 GN=Nono PE=1 SV=3	1.62
Nanp_K55	Nanp	VQVK*LSK	NANP_MOUSE N-acylneuraminate-9-phosphatase OS=Mus musculus OX=10090 GN=Nanp PE=1 SV=1	1.62
Vav1_K788	Vav1	YFGTAK*AR	VAV_MOUSE Proto-oncogene vav OS=Mus musculus OX=10090 GN=Vav1 PE=1 SV=1	1.615	0.284732
Tex30_K173	Tex30	NLLEK*VAQK	TEX30_MOUSE Testis-expressed protein 30 OS=Mus musculus OX=10090 GN=Tex30 PE=1 SV=1	1.61333	0.290426
Hsp90b1_K597	Hsp90b1	EGVK*FDESEK	ENPL_MOUSE Endoplasmin OS=Mus musculus OX=10090 GN=Hsp90b1 PE=1 SV=2	1.6125	0.217222
Rela_K195	Rela	APNTAELK*ICR	TF65_MOUSE Transcription factor p65 OS=Mus musculus OX=10090 GN=Rela PE=1 SV=1	1.61
Rpl29_K122	Rpl29	PK*VQTK	RL29_MOUSE 60S ribosomal protein L29 OS=Mus musculus OX=10090 GN=Rpl29 PE=1 SV=2	1.61
Hsp90b1_K630	Hsp90b1	ALKDK*IEK	ENPL_MOUSE Endoplasmin OS=Mus musculus OX=10090 GN=Hsp90b1 PE=1 SV=2	1.61
Capg_K128	Capg	EGGVESAFHK*TTSGARGAAIR	CAPG_MOUSE Macrophage-capping protein OS=Mus musculus OX=10090 GN=Capg PE=1 SV=2	1.61
Stip1_K68	Stip1	TVDLK*PDWGK	STIP1_MOUSE Stress-induced-phosphoprotein 1 OS=Mus musculus OX=10090 GN=Stip1 PE=1 SV=1	1.60667	0.0197178
Atp5f1b_K159	Atp5f1b	GPIK*TK	ATPB_MOUSE ATP synthase subunit beta, mitochondrial OS=Mus musculus OX=10090 GN=Atp5f1b PE=1 SV=2	1.60643	0.0434743
Hnrnpa1_K52	Hnrnpa1	DPNTK*R	ROA1_MOUSE Heterogeneous nuclear ribonucleoprotein A1 OS=Mus musculus OX=10090 GN=Hnrnpa1 PE=1 SV=2	1.6025	0.117516
Ckap4_K567	Ckap4	LFLK*VEK	CKAP4_MOUSE Cytoskeleton-associated protein 4 OS=Mus musculus OX=10090 GN=Ckap4 PE=1 SV=2	1.6
Nasp_K45	Nasp	K*LLGLGQK	NASP_MOUSE Nuclear autoantigenic sperm protein OS=Mus musculus OX=10090 GN=Nasp PE=1 SV=2	1.6	0.00517489
Dbi_K77	Dbi	TYVEK*VDELKK	ACBP_MOUSE Acyl-CoA-binding protein OS=Mus musculus OX=10090 GN=Dbi PE=1 SV=2	1.6	0.0155544
Acot7_K370	Acot7	YLQMK*AK	BACH_MOUSE Cytosolic acyl coenzyme A thioester hydrolase OS=Mus musculus OX=10090 GN=Acot7 PE=1 SV=2	1.59875	0.0117372
Stip1_K325	Stip1	DAIHFYNK*SLAEHR	STIP1_MOUSE Stress-induced-phosphoprotein 1 OS=Mus musculus OX=10090 GN=Stip1 PE=1 SV=1	1.5975	0.133155
Akr1b1_K235	Akr1b1	IK*AIAAK	ALDR_MOUSE Aldo-keto reductase family 1 member B1 OS=Mus musculus OX=10090 GN=Akr1b1 PE=1 SV=3	1.59688	0.0381548
Ncl_K87	Ncl	AAVTPGK*K	NUCL_MOUSE Nucleolin OS=Mus musculus OX=10090 GN=Ncl PE=1 SV=2	1.59643	0.082807
Rps4x_K37	Rps4x	PSTGPHK*LR	RS4X_MOUSE 40S ribosomal protein S4, X isoform OS=Mus musculus OX=10090 GN=Rps4x PE=1 SV=2	1.596	0.0415448
Ranbp1_K154	Ranbp1	TK*FEECR	RANG_MOUSE Ran-specific GTPase-activating protein OS=Mus musculus OX=10090 GN=Ranbp1 PE=1 SV=2	1.59333	0.482929
Set_K171	Set	STEIK*WK	SET_MOUSE Protein SET OS=Mus musculus OX=10090 GN=Set PE=1 SV=1	1.5925	0.0402292
Frg1_K236	Frg1	K*DGFLHETLLDR	FRG1_MOUSE Protein FRG1 OS=Mus musculus OX=10090 GN=Frg1 PE=1 SV=2	1.59
Chmp1a_K40	Chmp1a	ALQQK*NVECAR	CHM1A_MOUSE Charged multivesicular body protein 1a OS=Mus musculus OX=10090 GN=Chmp1a PE=1 SV=1	1.59
Rps8_K37	Rps8	PAANTK*IGPR	RS8_MOUSE 40S ribosomal protein S8 OS=Mus musculus OX=10090 GN=Rps8 PE=1 SV=2	1.59
Phgdh_K394	Phgdh	QADVNLVNAK*LLVK	SERA_MOUSE D-3-phosphoglycerate dehydrogenase OS=Mus musculus OX=10090 GN=Phgdh PE=1 SV=3	1.59
Atp5po_K90	Atp5po	VK*SLNDITK	ATPO_MOUSE ATP synthase subunit O, mitochondrial OS=Mus musculus OX=10090 GN=Atp5po PE=1 SV=1	1.5875	0.179387
Srrm2_K784	Srrm2	QK*SQTPTR	SRRM2_MOUSE Serine/arginine repetitive matrix protein 2 OS=Mus musculus OX=10090 GN=Srrm2 PE=1 SV=3	1.5875	0.386065
Acat1_K260	Acat1	VDFSK*VPK	THIL_MOUSE Acetyl-CoA acetyltransferase, mitochondrial OS=Mus musculus OX=10090 GN=Acat1 PE=1 SV=1	1.58357	0.239693
Smap_K50	Smap	K*EHTGR	SMAP_MOUSE Small acidic protein OS=Mus musculus OX=10090 GN=Smap PE=1 SV=1	1.58
Tm9sf2_K233	Tm9sf2	LVAAK*LEPK	TM9S2_MOUSE Transmembrane 9 superfamily member 2 OS=Mus musculus OX=10090 GN=Tm9sf2 PE=1 SV=1	1.58
Lemd2_K194	Lemd2	PGLK*GSR	LEMD2_MOUSE LEM domain-containing protein 2 OS=Mus musculus OX=10090 GN=Lemd2 PE=1 SV=1	1.58	0.0389227
Rsl1d1_K144	Rsl1d1	AYEAK*LR	RL1D1_MOUSE Ribosomal L1 domain-containing protein 1 OS=Mus musculus OX=10090 GN=Rsl1d1 PE=1 SV=1	1.58	0.431864
S100a6_K31	S100a6	HTLSK*K	S10A6_MOUSE Protein S100-A6 OS=Mus musculus OX=10090 GN=S100a6 PE=1 SV=3	1.58	0.518436
Mybbp1a_K940	Mybbp1a	GNTNK*R	MBB1A_MOUSE Myb-binding protein 1A OS=Mus musculus OX=10090 GN=Mybbp1a PE=1 SV=2	1.575	0.227793
Nono_K11	Nono	AFNLEK*QNHTPR	NONO_MOUSE Non-POU domain-containing octamer-binding protein OS=Mus musculus OX=10090 GN=Nono PE=1 SV=3	1.57417	0.0879862
C1qbp_K120	C1qbp	K*VAGEK	C1QBP_MOUSE Complement component 1 Q subcomponent-binding protein, mitochondrial OS=Mus musculus OX=10090 GN=C1qbp PE=1 SV=1	1.57167	0.0572613
Pgk1_K139	Pgk1	DASGNK*VK	PGK1_MOUSE Phosphoglycerate kinase 1 OS=Mus musculus OX=10090 GN=Pgk1 PE=1 SV=4	1.57071	0.0351875
Sf3a2_K118	Sf3a2	PGYK*VTK	SF3A2_MOUSE Splicing factor 3A subunit 2 OS=Mus musculus OX=10090 GN=Sf3a2 PE=1 SV=2	1.57
Ncl_K138	Ncl	NGK*NAK	NUCL_MOUSE Nucleolin OS=Mus musculus OX=10090 GN=Ncl PE=1 SV=2	1.57
Eif3j2_K122	Eif3j2	VLTPEEQLADK*LR	EI3JB_MOUSE Eukaryotic translation initiation factor 3 subunit J-B OS=Mus musculus OX=10090 GN=Eif3j2 PE=1 SV=1	1.57
Rps7_K169	Rps7	AQQNNVEHK*VETFSGVYK	RS7_MOUSE 40S ribosomal protein S7 OS=Mus musculus OX=10090 GN=Rps7 PE=2 SV=1	1.56917	0.202846
Npm1_K214	Npm1	DLK*PSTPR	NPM_MOUSE Nucleophosmin OS=Mus musculus OX=10090 GN=Npm1 PE=1 SV=1	1.56714	0.0842062
Hdlbp_K1066	Hdlbp	YHPK*IIGR	VIGLN_MOUSE Vigilin OS=Mus musculus OX=10090 GN=Hdlbp PE=1 SV=1	1.565	0.149312
Sec61b_K35	Sec61b	K*NASCGTR	SC61B_MOUSE Protein transport protein Sec61 subunit beta OS=Mus musculus OX=10090 GN=Sec61b PE=1 SV=3	1.56187	0.0289796
Rcc2_K318	Rcc2	TK*DGQILPVPNVVVR	RCC2_MOUSE Protein RCC2 OS=Mus musculus OX=10090 GN=Rcc2 PE=1 SV=1	1.56
Tkt_K499	Tkt	SK*DDQVTVIGAGVTLHEALAAAESLKK	TKT_MOUSE Transketolase OS=Mus musculus OX=10090 GN=Tkt PE=1 SV=1	1.56
Gnl3_K133	Gnl3	LHCQELK*K	GNL3_MOUSE Guanine nucleotide-binding protein-like 3 OS=Mus musculus OX=10090 GN=Gnl3 PE=1 SV=2	1.56
gag_K119	gag	IAHNQSVDVK*K	GGAG_MLVMN Glyco-Gag protein OS=Moloney murine leukemia virus (strain neuropathogenic variant ts1-92b) OX=882209 GN=gag PE=3 SV=2	1.56
Txn_K94	Txn	VGEFSGANK*EK	THIO_MOUSE Thioredoxin OS=Mus musculus OX=10090 GN=Txn PE=1 SV=3	1.55813	0.0561377
Lmna_K417	Lmna	ASSHSSQSQGGGSVTK*K	LMNA_MOUSE Prelamin-A/C OS=Mus musculus OX=10090 GN=Lmna PE=1 SV=2	1.558	0.270201
Gps1_K138	Gps1	GNSIK*ESIR	CSN1_MOUSE COP9 signalosome complex subunit 1 OS=Mus musculus OX=10090 GN=Gps1 PE=1 SV=1	1.55667	0.436251
Atp5if1_K90	Atp5if1	LQK*QIER	ATIF1_MOUSE ATPase inhibitor, mitochondrial OS=Mus musculus OX=10090 GN=Atp5if1 PE=1 SV=2	1.55583	0.0746634
Prkacb_K293	Prkacb	NGVSDIK*THK	KAPCB_MOUSE cAMP-dependent protein kinase catalytic subunit beta OS=Mus musculus OX=10090 GN=Prkacb PE=1 SV=2	1.555	0.408747
Cap1_K80	Cap1	HAEMVHTGLK*LER	CAP1_MOUSE Adenylyl cyclase-associated protein 1 OS=Mus musculus OX=10090 GN=Cap1 PE=1 SV=4	1.55063	0.165351
Cep85_K728	Cep85	K*LEEVQQLR	CEP85_MOUSE Centrosomal protein of 85 kDa OS=Mus musculus OX=10090 GN=Cep85 PE=1 SV=2	1.55
Mia2_K1054	Mia2	K*AHDNWLAAR	MIA2_MOUSE Melanoma inhibitory activity protein 2 OS=Mus musculus OX=10090 GN=Mia2 PE=1 SV=3	1.55
Cep350_K392	Cep350	VVK*PVR	CE350_MOUSE Centrosome-associated protein 350 OS=Mus musculus OX=10090 GN=Cep350 PE=1 SV=1	1.55
Vim_K294	Vim	SK*FADLSEAANR	VIME_MOUSE Vimentin OS=Mus musculus OX=10090 GN=Vim PE=1 SV=3	1.54643	0.10714
S100a4_K26	S100a4	EGDK*FK	S10A4_MOUSE Protein S100-A4 OS=Mus musculus OX=10090 GN=S100a4 PE=1 SV=1	1.54583	0.0661012
Hspa9_K654	Hspa9	K*MASER	GRP75_MOUSE Stress-70 protein, mitochondrial OS=Mus musculus OX=10090 GN=Hspa9 PE=1 SV=3	1.545	0.576638
Bri3bp_K49	Bri3bp	GAADK*NSHR	BRI3B_MOUSE BRI3-binding protein OS=Mus musculus OX=10090 GN=Bri3bp PE=1 SV=1	1.545
Slc25a5_K147	Slc25a5	LAADVGK*AGAER	ADT2_MOUSE ADP/ATP translocase 2 OS=Mus musculus OX=10090 GN=Slc25a5 PE=1 SV=3	1.54438	0.0179046
Ywhag_K162	Ywhag	AYSEAHEISK*EHMQPTHPIR	1433G_MOUSE 14-3-3 protein gamma OS=Mus musculus OX=10090 GN=Ywhag PE=1 SV=2	1.54417	0.0543704
Gmip_K947	Gmip	LLSK*LNSDAVSR	GMIP_MOUSE GEM-interacting protein OS=Mus musculus OX=10090 GN=Gmip PE=1 SV=1	1.54
Ankfy1_K937	Ankfy1	VNELTK*HR	ANFY1_MOUSE Rabankyrin-5 OS=Mus musculus OX=10090 GN=Ankfy1 PE=1 SV=2	1.54	0.419746
Eno1_K422	Eno1	AK*FAGR	ENOA_MOUSE Alpha-enolase OS=Mus musculus OX=10090 GN=Eno1 PE=1 SV=3	1.535	0.559175
Myh9_K1387	Myh9	MEDGVGCLETAEEAK*R	MYH9_MOUSE Myosin-9 OS=Mus musculus OX=10090 GN=Myh9 PE=1 SV=4	1.535	0.229682
Pgam1_K241	Pgam1	K*AMEAVAAQGK	PGAM1_MOUSE Phosphoglycerate mutase 1 OS=Mus musculus OX=10090 GN=Pgam1 PE=1 SV=3	1.535	0.462225
Arrb2_K296	Arrb2	GLALDGQLK*HEDTNLASSTIVK	ARRB2_MOUSE Beta-arrestin-2 OS=Mus musculus OX=10090 GN=Arrb2 PE=1 SV=1	1.53438	0.072419
Hnrnpl_K94	Hnrnpl	TENAGDQHGGGGGGGSGAAGGGGGENYDDPHK*TPASPVVHIR	HNRPL_MOUSE Heterogeneous nuclear ribonucleoprotein L OS=Mus musculus OX=10090 GN=Hnrnpl PE=1 SV=2	1.534	0.206893
Abce1_K431	Abce1	QLLHEK*IR	ABCE1_MOUSE ATP-binding cassette sub-family E member 1 OS=Mus musculus OX=10090 GN=Abce1 PE=1 SV=1	1.53333	0.482939
Pds5a_K29	Pds5a	VK*EITDK	PDS5A_MOUSE Sister chromatid cohesion protein PDS5 homolog A OS=Mus musculus OX=10090 GN=Pds5a PE=1 SV=3	1.5325	0.381479
Mtatp8_K48	Mtatp8	VK*TPWELK	ATP8_MOUSE ATP synthase protein 8 OS=Mus musculus OX=10090 GN=Mtatp8 PE=1 SV=1	1.53214	0.123705
Fkbp4_K387	Fkbp4	VLQLYPSNK*AAK	FKBP4_MOUSE Peptidyl-prolyl cis-trans isomerase FKBP4 OS=Mus musculus OX=10090 GN=Fkbp4 PE=1 SV=5	1.53167	0.286942
Anp32a_K91	Anp32a	CPNLK*HLNLSGNK	AN32A_MOUSE Acidic leucine-rich nuclear phosphoprotein 32 family member A OS=Mus musculus OX=10090 GN=Anp32a PE=1 SV=1	1.53
Ublcp1_K44	Ublcp1	QK*LLGLK	UBCP1_MOUSE Ubiquitin-like domain-containing CTD phosphatase 1 OS=Mus musculus OX=10090 GN=Ublcp1 PE=1 SV=1	1.53
Srrm1_K681	Srrm1	K*GSSPGR	SRRM1_MOUSE Serine/arginine repetitive matrix protein 1 OS=Mus musculus OX=10090 GN=Srrm1 PE=1 SV=2	1.53
Timm8a1_K86	Timm8a1	LEQTQK*SK	TIM8A_MOUSE Mitochondrial import inner membrane translocase subunit Tim8 A OS=Mus musculus OX=10090 GN=Timm8a1 PE=1 SV=1	1.53
Rbmxl1_K77	Rbmxl1	SLDGK*AIK	RMXL1_MOUSE RNA binding motif protein, X-linked-like-1 OS=Mus musculus OX=10090 GN=Rbmxl1 PE=2 SV=1	1.53
Efhd2_K226	Efhd2	QAEEVK*QR	EFHD2_MOUSE EF-hand domain-containing protein D2 OS=Mus musculus OX=10090 GN=Efhd2 PE=1 SV=1	1.53
Pgam1_K251	Pgam1	AMEAVAAQGK*VK	PGAM1_MOUSE Phosphoglycerate mutase 1 OS=Mus musculus OX=10090 GN=Pgam1 PE=1 SV=3	1.53	0.0239877
Got2_K90	Got2	KAEAQIAAK*NLDK	AATM_MOUSE Aspartate aminotransferase, mitochondrial OS=Mus musculus OX=10090 GN=Got2 PE=1 SV=1	1.53	0.188131
Cndp2_K364	Cndp2	K*FAELQSPNK	CNDP2_MOUSE Cytosolic non-specific dipeptidase OS=Mus musculus OX=10090 GN=Cndp2 PE=1 SV=1	1.52875	0.0329059
Eef1g_K147	Eef1g	ILGLLDTHLK*TR	EF1G_MOUSE Elongation factor 1-gamma OS=Mus musculus OX=10090 GN=Eef1g PE=1 SV=3	1.52625	0.111129
Ehd1_K375	Ehd1	FQALK*PK	EHD1_MOUSE EH domain-containing protein 1 OS=Mus musculus OX=10090 GN=Ehd1 PE=1 SV=1	1.525	0.138001
Shmt2_K464	Shmt2	TAK*LQDFK	GLYM_MOUSE Serine hydroxymethyltransferase, mitochondrial OS=Mus musculus OX=10090 GN=Shmt2 PE=1 SV=1	1.52375	0.0402838
Grpel1_K64	Grpel1	TLLEEK*AK	GRPE1_MOUSE GrpE protein homolog 1, mitochondrial OS=Mus musculus OX=10090 GN=Grpel1 PE=1 SV=1	1.52333	0.448144
Ppm1g_K166	Ppm1g	YGQNCQK*VPPHTK	PPM1G_MOUSE Protein phosphatase 1G OS=Mus musculus OX=10090 GN=Ppm1g PE=1 SV=3	1.5225	0.123317
Ttc39b_K201	Ttc39b	GGLK*IR	TT39B_MOUSE Tetratricopeptide repeat protein 39B OS=Mus musculus OX=10090 GN=Ttc39b PE=1 SV=1	1.5225	0.338639
Eif4b_K453	Eif4b	SLENETLNK*EEDCHSPTSKPPKPDQPLK	IF4B_MOUSE Eukaryotic translation initiation factor 4B OS=Mus musculus OX=10090 GN=Eif4b PE=1 SV=1	1.521	0.0693043
Pcm1_K736	Pcm1	FYEAK*LQQQQR	PCM1_MOUSE Pericentriolar material 1 protein OS=Mus musculus OX=10090 GN=Pcm1 PE=1 SV=2	1.52
Abcf2_K527	Abcf2	NLSDGQK*CR	ABCF2_MOUSE ATP-binding cassette sub-family F member 2 OS=Mus musculus OX=10090 GN=Abcf2 PE=1 SV=1	1.52
Arhgef6_K22	Arhgef6	K*TVCDPEEFLK	ARHG6_MOUSE Rho guanine nucleotide exchange factor 6 OS=Mus musculus OX=10090 GN=Arhgef6 PE=1 SV=1	1.52	0.393703
Tln1_K910	Tln1	MATNAAAQNAIK*K	TLN1_MOUSE Talin-1 OS=Mus musculus OX=10090 GN=Tln1 PE=1 SV=2	1.51937	0.0490918
Mdh2_K329	Mdh2	K*GEDFVK	MDHM_MOUSE Malate dehydrogenase, mitochondrial OS=Mus musculus OX=10090 GN=Mdh2 PE=1 SV=3	1.51813	0.0239655
Hnrnpk_K63	Hnrnpk	GGK*NIK	HNRPK_MOUSE Heterogeneous nuclear ribonucleoprotein K OS=Mus musculus OX=10090 GN=Hnrnpk PE=1 SV=1	1.51786	0.0927035
Gusb_K346	Gusb	PFYFQGVNK*HEDSDIR	BGLR_MOUSE Beta-glucuronidase OS=Mus musculus OX=10090 GN=Gusb PE=1 SV=2	1.5175	0.290671
Tkt_K497	Tkt	VVLK*SK	TKT_MOUSE Transketolase OS=Mus musculus OX=10090 GN=Tkt PE=1 SV=1	1.51714	0.0164588
Smarcc1_K739	Smarcc1	K*VQEAAR	SMRC1_MOUSE SWI/SNF complex subunit SMARCC1 OS=Mus musculus OX=10090 GN=Smarcc1 PE=1 SV=2	1.51667	0.265023
Ranbp2_K2560	Ranbp2	AK*ADTLK	RBP2_MOUSE E3 SUMO-protein ligase RanBP2 OS=Mus musculus OX=10090 GN=Ranbp2 PE=1 SV=2	1.51667	0.457401
Kif15_K1280	Kif15	TNLEEVQSALHSK*EK	KIF15_MOUSE Kinesin-like protein KIF15 OS=Mus musculus OX=10090 GN=Kif15 PE=1 SV=1	1.515	0.5
Npm1_K234	Npm1	TPK*TPK	NPM_MOUSE Nucleophosmin OS=Mus musculus OX=10090 GN=Npm1 PE=1 SV=1	1.51375	0.0496223
Hspa4_K675	Hspa4	QVYVDK*LAELK	HSP74_MOUSE Heat shock 70 kDa protein 4 OS=Mus musculus OX=10090 GN=Hspa4 PE=1 SV=1	1.5125	0.253842
Hnrnpm_K387	Hnrnpm	GEIIAK*QGGGGAGGSVPGIER	HNRPM_MOUSE Heterogeneous nuclear ribonucleoprotein M OS=Mus musculus OX=10090 GN=Hnrnpm PE=1 SV=3	1.51125	0.11169
Eef1a1_K457	Eef1a1	SAQK*AQK	EF1A1_MOUSE Elongation factor 1-alpha 1 OS=Mus musculus OX=10090 GN=Eef1a1 PE=1 SV=3	1.51083	0.0272999
Etv1_K296	Etv1	FEK*GPR	ETV1_MOUSE ETS translocation variant 1 OS=Mus musculus OX=10090 GN=Etv1 PE=1 SV=1	1.51
Copa_K198	Copa	GITGVDLFGTTDAVVK*HVLEGHDR	COPA_MOUSE Coatomer subunit alpha OS=Mus musculus OX=10090 GN=Copa PE=1 SV=2	1.51
Tcof1_K504	Tcof1	AK*ASLALPQK	TCOF_MOUSE Treacle protein OS=Mus musculus OX=10090 GN=Tcof1 PE=1 SV=1	1.51	0.338506
Mcm2_K742	Mcm2	LNQMDQDK*VAR	MCM2_MOUSE DNA replication licensing factor MCM2 OS=Mus musculus OX=10090 GN=Mcm2 PE=1 SV=3	1.51	0.3477
Bsg_K379	Bsg	GSGTHMNDK*DK	BASI_MOUSE Basigin OS=Mus musculus OX=10090 GN=Bsg PE=1 SV=2	1.51	0.391306
Gpi_K447	Gpi	K*ELQAAGK	G6PI_MOUSE Glucose-6-phosphate isomerase OS=Mus musculus OX=10090 GN=Gpi PE=1 SV=4	1.51	0.426393
Hspa9_K467	Hspa9	NTTIPTK*K	GRP75_MOUSE Stress-70 protein, mitochondrial OS=Mus musculus OX=10090 GN=Hspa9 PE=1 SV=3	1.51	0.460263
Eef1g_K434	Eef1g	AVNQGK*IFK	EF1G_MOUSE Elongation factor 1-gamma OS=Mus musculus OX=10090 GN=Eef1g PE=1 SV=3	1.50687	0.0558525
Lrrc59_K7	Lrrc59	AGSK*GGNLR	LRC59_MOUSE Leucine-rich repeat-containing protein 59 OS=Mus musculus OX=10090 GN=Lrrc59 PE=1 SV=1	1.506	0.118028
Acod1_K460	Acod1	LLK*GPSVQDEASK	IRG1_MOUSE Cis-aconitate decarboxylase OS=Mus musculus OX=10090 GN=Acod1 PE=1 SV=2	1.505	0.201043
Gars1_K225	Gars1	CSAEK*K	GARS_MOUSE Glycine--tRNA ligase OS=Mus musculus OX=10090 GN=Gars1 PE=1 SV=1	1.505	0.256239
Ptbp1_K485	Ptbp1	FFQK*DR	PTBP1_MOUSE Polypyrimidine tract-binding protein 1 OS=Mus musculus OX=10090 GN=Ptbp1 PE=1 SV=2	1.505	0.452679
Hspa8_K251	Hspa8	K*DISENKR	HSP7C_MOUSE Heat shock cognate 71 kDa protein OS=Mus musculus OX=10090 GN=Hspa8 PE=1 SV=1	1.50375	0.0215728
Atp5f1a_K305	Atp5f1a	DNGK*HALIIYDDLSK	ATPA_MOUSE ATP synthase subunit alpha, mitochondrial OS=Mus musculus OX=10090 GN=Atp5f1a PE=1 SV=1	1.50333	0.229847
Vasp_K307	Vasp	RPWEK*NSTTLPR	VASP_MOUSE Vasodilator-stimulated phosphoprotein OS=Mus musculus OX=10090 GN=Vasp PE=1 SV=4	1.5025	0.0911767
Gatm_K117	Gatm	NGGLYFPK*DHLK	GATM_MOUSE Glycine amidinotransferase, mitochondrial OS=Mus musculus OX=10090 GN=Gatm PE=1 SV=1	1.5025	0.625178
Fasn_K1152	Fasn	ALQTK*ATQQGLK	FAS_MOUSE Fatty acid synthase OS=Mus musculus OX=10090 GN=Fasn PE=1 SV=2	1.50125	0.0655412
Atp2a2_K464	Atp2a2	GLSK*IER	AT2A2_MOUSE Sarcoplasmic/endoplasmic reticulum calcium ATPase 2 OS=Mus musculus OX=10090 GN=Atp2a2 PE=1 SV=2	1.50062	0.12411
Oip5_K194	Oip5	IAELK*EK	MS18B_MOUSE Protein Mis18-beta OS=Mus musculus OX=10090 GN=Oip5 PE=2 SV=1	1.5
Sgsm1_K886	Sgsm1	IEK*DVQR	SGSM1_MOUSE Small G protein signaling modulator 1 OS=Mus musculus OX=10090 GN=Sgsm1 PE=1 SV=2	1.5
Hars1_K75	Hars1	EK*VFDVIIR	HARS1_MOUSE Histidine--tRNA ligase, cytoplasmic OS=Mus musculus OX=10090 GN=Hars1 PE=1 SV=2	1.5
Park7_K188	Park7	APLVLK*D	PARK7_MOUSE Parkinson disease protein 7 homolog OS=Mus musculus OX=10090 GN=Park7 PE=1 SV=1	1.5	0.552446
Cap1_K286	Cap1	NPALK*AQSGPVR	CAP1_MOUSE Adenylyl cyclase-associated protein 1 OS=Mus musculus OX=10090 GN=Cap1 PE=1 SV=4	1.49812	0.00131138
Hspd1_K236	Hspd1	GQK*CEFQDAYVLLSEK	CH60_MOUSE 60 kDa heat shock protein, mitochondrial OS=Mus musculus OX=10090 GN=Hspd1 PE=1 SV=1	1.49667	0.0209849
Shmt2_K302	Shmt2	TVDPK*TGK	GLYM_MOUSE Serine hydroxymethyltransferase, mitochondrial OS=Mus musculus OX=10090 GN=Shmt2 PE=1 SV=1	1.49562	0.0112021
Myh9_K1525	Myh9	SVHELEK*SK	MYH9_MOUSE Myosin-9 OS=Mus musculus OX=10090 GN=Myh9 PE=1 SV=4	1.49562	0.084088
S100a4_K22	S100a4	YSGK*EGDKFK	S10A4_MOUSE Protein S100-A4 OS=Mus musculus OX=10090 GN=S100a4 PE=1 SV=1	1.495	0.00583121
Prkar1a_K216	Prkar1a	AATVK*AK	KAP0_MOUSE cAMP-dependent protein kinase type I-alpha regulatory subunit OS=Mus musculus OX=10090 GN=Prkar1a PE=1 SV=3	1.495	0.271599
Hnrnpc_K185	Hnrnpc	GSSSK*SGK	HNRPC_MOUSE Heterogeneous nuclear ribonucleoproteins C1/C2 OS=Mus musculus OX=10090 GN=Hnrnpc PE=1 SV=1	1.49167	0.0829966
Hspd1_K87	Hspd1	SIDLK*DK	CH60_MOUSE 60 kDa heat shock protein, mitochondrial OS=Mus musculus OX=10090 GN=Hspd1 PE=1 SV=1	1.49125	0.186422
Mki67_K610	Mki67	LGVK*QTQTK	KI67_MOUSE Proliferation marker protein Ki-67 OS=Mus musculus OX=10090 GN=Mki67 PE=1 SV=1	1.49
Grb2_K69	Grb2	AK*AEEMLSK	GRB2_MOUSE Growth factor receptor-bound protein 2 OS=Mus musculus OX=10090 GN=Grb2 PE=1 SV=1	1.49
H2ax_K120	H2ax	K*SSATVGPK	H2AX_MOUSE Histone H2AX OS=Mus musculus OX=10090 GN=H2ax PE=1 SV=2	1.49
Snx2_K335	Snx2	K*ELSANTAAFAK	SNX2_MOUSE Sorting nexin-2 OS=Mus musculus OX=10090 GN=Snx2 PE=1 SV=2	1.49
Hspe1_K56	Hspe1	GK*SGEIEPVSVK	CH10_MOUSE 10 kDa heat shock protein, mitochondrial OS=Mus musculus OX=10090 GN=Hspe1 PE=1 SV=2	1.49	0.0848048
Nrdc_K337	Nrdc	K*EMLFGSLAR	NRDC_MOUSE Nardilysin OS=Mus musculus OX=10090 GN=Nrdc PE=1 SV=1	1.49	0.100223
Rps21_K74	Rps21	LAK*ADGIVSK	RS21_MOUSE 40S ribosomal protein S21 OS=Mus musculus OX=10090 GN=Rps21 PE=1 SV=1	1.48857	0.194167
Irf5_K96	Irf5	CALNK*SR	IRF5_MOUSE Interferon regulatory factor 5 OS=Mus musculus OX=10090 GN=Irf5 PE=1 SV=1	1.48333	0.144375
Hnrnpl_K62	Hnrnpl	LK*TENAGDQHGGGGGGGSGAAGGGGGENYDDPHK	HNRPL_MOUSE Heterogeneous nuclear ribonucleoprotein L OS=Mus musculus OX=10090 GN=Hnrnpl PE=1 SV=2	1.48333	0.173748
Serbp1_K122	Serbp1	RPDQQLQGDGK*LIDR	PAIRB_MOUSE Plasminogen activator inhibitor 1 RNA-binding protein OS=Mus musculus OX=10090 GN=Serbp1 PE=1 SV=2	1.48333	0.213615
Hspa8_K535	Hspa8	DK*VSSK	HSP7C_MOUSE Heat shock cognate 71 kDa protein OS=Mus musculus OX=10090 GN=Hspa8 PE=1 SV=1	1.48083	0.0274312
Csde1_K277	Csde1	VPSK*NQNDPLPGR	CSDE1_MOUSE Cold shock domain-containing protein E1 OS=Mus musculus OX=10090 GN=Csde1 PE=1 SV=1	1.48
Etf1_K83	Etf1	IK*LYNK	ERF1_MOUSE Eukaryotic peptide chain release factor subunit 1 OS=Mus musculus OX=10090 GN=Etf1 PE=1 SV=4	1.48
Rrbp1_K1382	Rrbp1	HLEDIVEK*LK	RRBP1_MOUSE Ribosome-binding protein 1 OS=Mus musculus OX=10090 GN=Rrbp1 PE=1 SV=2	1.48
Arhgap45_K695	Arhgap45	HVGLSK*AAR	HMHA1_MOUSE Rho GTPase-activating protein 45 OS=Mus musculus OX=10090 GN=Arhgap45 PE=1 SV=2	1.48
Chmp4b_K14	Chmp4b	LFGAGGGK*AGK	CHM4B_MOUSE Charged multivesicular body protein 4b OS=Mus musculus OX=10090 GN=Chmp4b PE=1 SV=2	1.48
Septin11_K378	Septin11	THQEEK*K	SEP11_MOUSE Septin-11 OS=Mus musculus OX=10090 GN=Septin11 PE=1 SV=4	1.48
Setd2_K354	Setd2	K*SSAPSK	SETD2_MOUSE Histone-lysine N-methyltransferase SETD2 OS=Mus musculus OX=10090 GN=Setd2 PE=1 SV=1	1.48
Parp1_K87	Parp1	K*TAEAGGVAGK	PARP1_MOUSE Poly [ADP-ribose] polymerase 1 OS=Mus musculus OX=10090 GN=Parp1 PE=1 SV=3	1.48
Ptpn6_K97	Ptpn6	DGTIIHLK*YPLNCSDPTSER	PTN6_MOUSE Tyrosine-protein phosphatase non-receptor type 6 OS=Mus musculus OX=10090 GN=Ptpn6 PE=1 SV=2	1.48
Ddx3x_K255	Ddx3x	AMK*ENGR	DDX3X_MOUSE ATP-dependent RNA helicase DDX3X OS=Mus musculus OX=10090 GN=Ddx3x PE=1 SV=3	1.48	0.0911379
Rrp12_K819	Rrp12	FVQSHLDDLK*K	RRP12_MOUSE RRP12-like protein OS=Mus musculus OX=10090 GN=Rrp12 PE=1 SV=1	1.48	0.325985
Trim37_K149	Trim37	VNEEVAK*LR	TRI37_MOUSE E3 ubiquitin-protein ligase TRIM37 OS=Mus musculus OX=10090 GN=Trim37 PE=1 SV=1	1.48	0.450032
Prkar1a_K70	Prkar1a	QIQCLQK*TGIR	KAP0_MOUSE cAMP-dependent protein kinase type I-alpha regulatory subunit OS=Mus musculus OX=10090 GN=Prkar1a PE=1 SV=3	1.476	0.219398
Grik2_K212	Grik2	DAK*PLLK	GRIK2_MOUSE Glutamate receptor ionotropic, kainate 2 OS=Mus musculus OX=10090 GN=Grik2 PE=1 SV=4	1.475	0.5711
Gfm1_K468	Gfm1	FSK*GIGR	EFGM_MOUSE Elongation factor G, mitochondrial OS=Mus musculus OX=10090 GN=Gfm1 PE=1 SV=1	1.47	0.227243
Septin2_K190	Septin2	ADTLTLK*ER	SEPT2_MOUSE Septin-2 OS=Mus musculus OX=10090 GN=Septin2 PE=1 SV=2	1.47
Eprs1_K726	Eprs1	K*ETSSAPK	SYEP_MOUSE Bifunctional glutamate/proline--tRNA ligase OS=Mus musculus OX=10090 GN=Eprs1 PE=1 SV=4	1.47
Pdia3_K425	Pdia3	LSK*DPNIVIAK	PDIA3_MOUSE Protein disulfide-isomerase A3 OS=Mus musculus OX=10090 GN=Pdia3 PE=1 SV=2	1.47
Fnbp1l_K420	Fnbp1l	GLQK*EADQK	FBP1L_MOUSE Formin-binding protein 1-like OS=Mus musculus OX=10090 GN=Fnbp1l PE=1 SV=2	1.47
Calr_K64	Calr	DK*GLQTSQDAR	CALR_MOUSE Calreticulin OS=Mus musculus OX=10090 GN=Calr PE=1 SV=1	1.47
Srsf9_K47	Srsf9	EIELK*NR	SRSF9_MOUSE Serine/arginine-rich splicing factor 9 OS=Mus musculus OX=10090 GN=Srsf9 PE=1 SV=1	1.47
Rps28_K10	Rps28	VQPIK*LAR	RS28_MOUSE 40S ribosomal protein S28 OS=Mus musculus OX=10090 GN=Rps28 PE=1 SV=1	1.47	0.0214689
Actn4_K418	Actn4	LDHLAEK*FR	ACTN4_MOUSE Alpha-actinin-4 OS=Mus musculus OX=10090 GN=Actn4 PE=1 SV=1	1.46917	0.383907
Cps1_K1222	Cps1	GAIEK*VK	CPSM_MOUSE Carbamoyl-phosphate synthase [ammonia], mitochondrial OS=Mus musculus OX=10090 GN=Cps1 PE=1 SV=2	1.4675	0.304628
Npm1_K227	Npm1	SKGQESFK*K	NPM_MOUSE Nucleophosmin OS=Mus musculus OX=10090 GN=Npm1 PE=1 SV=1	1.4675	0.382276
G6pdx_K97	G6pdx	ATPEERPK*LEEFFAR PK*LEEFFAR	G6PD1_MOUSE Glucose-6-phosphate 1-dehydrogenase X OS=Mus musculus OX=10090 GN=G6pdx PE=1 SV=3	1.46667	0.13511
Tpd52_K184	Tpd52	VENLK*SK	TPD52_MOUSE Tumor protein D52 OS=Mus musculus OX=10090 GN=Tpd52 PE=1 SV=2	1.46667	0.298384
Helb_K969	Helb	TPDNK*ATADSAR	HELB_MOUSE DNA helicase B OS=Mus musculus OX=10090 GN=Helb PE=1 SV=2	1.46667	0.399269
Hnrnpa0_K176	Hnrnpa0	AVPK*EDIHAGGGGAR	ROA0_MOUSE Heterogeneous nuclear ribonucleoprotein A0 OS=Mus musculus OX=10090 GN=Hnrnpa0 PE=1 SV=1	1.46643	0.0984378
H4c1_K13	H4c1	GLGK*GGAK	H4_MOUSE Histone H4 OS=Mus musculus OX=10090 GN=H4c1 PE=1 SV=2	1.46625	0.00886635
H2ax_K37	H2ax	K*GHYAER	H2AX_MOUSE Histone H2AX OS=Mus musculus OX=10090 GN=H2ax PE=1 SV=2	1.46375	0.234743
Fau_K1	Fau	K*VHGSLAR	RS30_MUSSI 40S ribosomal protein S30 OS=Mus spicilegus OX=10103 GN=Fau PE=3 SV=1	1.46143	0.200708
Pgk1_K141	Pgk1	VK*AEPAK	PGK1_MOUSE Phosphoglycerate kinase 1 OS=Mus musculus OX=10090 GN=Pgk1 PE=1 SV=4	1.46125	0.0166016
Rps27a_K48	Rps27a	IFAGK*QLEDGR LIFAGK*QLEDGR	RS27A_MOUSE Ubiquitin-40S ribosomal protein S27a OS=Mus musculus OX=10090 GN=Rps27a PE=1 SV=2	1.46062	0.0780346
Ddx1_K281	Ddx1	SQHTGNAQVSQTK*FLPNAPK	DDX1_MOUSE ATP-dependent RNA helicase DDX1 OS=Mus musculus OX=10090 GN=Ddx1 PE=1 SV=1	1.46	0.0249616
Frem2_K1274	Frem2	LTDGK*HSVEK	FREM2_MOUSE FRAS1-related extracellular matrix protein 2 OS=Mus musculus OX=10090 GN=Frem2 PE=1 SV=2	1.46
Msn_K64	Msn	K*VTAQDVR	MOES_MOUSE Moesin OS=Mus musculus OX=10090 GN=Msn PE=1 SV=3	1.46
Prpf6_K395	Prpf6	K*ALEHVPNSVR	PRP6_MOUSE Pre-mRNA-processing factor 6 OS=Mus musculus OX=10090 GN=Prpf6 PE=1 SV=1	1.46
Phb2_K89	Phb2	K*ISSPTGSK	PHB2_MOUSE Prohibitin-2 OS=Mus musculus OX=10090 GN=Phb2 PE=1 SV=1	1.46
Shmt2_K305	Shmt2	TGK*EIPYTFEDR	GLYM_MOUSE Serine hydroxymethyltransferase, mitochondrial OS=Mus musculus OX=10090 GN=Shmt2 PE=1 SV=1	1.46
Lgals3_K190	Lgals3	VIVCNTK*QDNNWGK	LEG3_MOUSE Galectin-3 OS=Mus musculus OX=10090 GN=Lgals3 PE=1 SV=3	1.46
Smap_K62	Smap	LVIGDHK*STSHFR	SMAP_MOUSE Small acidic protein OS=Mus musculus OX=10090 GN=Smap PE=1 SV=1	1.46	0.309271
Rps27a_K33	Rps27a	IQDK*EGIPPDQQR	RS27A_MOUSE Ubiquitin-40S ribosomal protein S27a OS=Mus musculus OX=10090 GN=Rps27a PE=1 SV=2	1.46	0.32751
Hsp90aa1_K632	Hsp90aa1	DNSTMGYMAAK*K	HS90A_MOUSE Heat shock protein HSP 90-alpha OS=Mus musculus OX=10090 GN=Hsp90aa1 PE=1 SV=4	1.46	0.471083
Srsf1_K174	Srsf1	K*LDNTK	SRSF1_MOUSE Serine/arginine-rich splicing factor 1 OS=Mus musculus OX=10090 GN=Srsf1 PE=1 SV=3	1.45917	0.198856
Npm1_K248	Npm1	AK*MQASIEK	NPM_MOUSE Nucleophosmin OS=Mus musculus OX=10090 GN=Npm1 PE=1 SV=1	1.45813	0.0271356
Ddx39b_K188	Ddx39b	SLNLK*HIK	DX39B_MOUSE Spliceosome RNA helicase Ddx39b OS=Mus musculus OX=10090 GN=Ddx39b PE=1 SV=1	1.45667	0.258179
Npm1_K205	Npm1	NAQK*SNQNGK	NPM_MOUSE Nucleophosmin OS=Mus musculus OX=10090 GN=Npm1 PE=1 SV=1	1.455	0.0139545
Hspa9_K625	Hspa9	ALLAGK*DSETGENIR	GRP75_MOUSE Stress-70 protein, mitochondrial OS=Mus musculus OX=10090 GN=Hspa9 PE=1 SV=3	1.45438	0.159484
Hmgb1_K90	Hmgb1	FK*DPNAPK	HMGB1_MOUSE High mobility group protein B1 OS=Mus musculus OX=10090 GN=Hmgb1 PE=1 SV=2	1.45437	0.132281
Erlin1_K269	Erlin1	ADAEYYAAHK*YATSNK	ERLN1_MOUSE Erlin-1 OS=Mus musculus OX=10090 GN=Erlin1 PE=1 SV=2	1.4525	0.468061
Gdi2_K269	Gdi2	VVGVK*SEGEIAR	GDIB_MOUSE Rab GDP dissociation inhibitor beta OS=Mus musculus OX=10090 GN=Gdi2 PE=1 SV=1	1.45167	0.399735
Hmgb1_K127	Hmgb1	GEHPGLSIGDVAK*K	HMGB1_MOUSE High mobility group protein B1 OS=Mus musculus OX=10090 GN=Hmgb1 PE=1 SV=2	1.45083	0.162793
Tpt1_K102	Tpt1	GK*LEEQKPER	TCTP_MOUSE Translationally-controlled tumor protein OS=Mus musculus OX=10090 GN=Tpt1 PE=1 SV=1	1.45
Pdcd5_K63	Pdcd5	LSNLALVK*PEK	PDCD5_MOUSE Programmed cell death protein 5 OS=Mus musculus OX=10090 GN=Pdcd5 PE=1 SV=3	1.45
Gga1_K87	Gga1	FHDEVGK*FR	GGA1_MOUSE ADP-ribosylation factor-binding protein GGA1 OS=Mus musculus OX=10090 GN=Gga1 PE=1 SV=1	1.45
Taldo1_K269	Taldo1	DNSK*LAPALSVK	TALDO_MOUSE Transaldolase OS=Mus musculus OX=10090 GN=Taldo1 PE=1 SV=2	1.45
Pdia3_K231	Pdia3	MTSGK*IK	PDIA3_MOUSE Protein disulfide-isomerase A3 OS=Mus musculus OX=10090 GN=Pdia3 PE=1 SV=2	1.45	0.218503
Cct5_K214	Cct5	VEGK*VGGR	TCPE_MOUSE T-complex protein 1 subunit epsilon OS=Mus musculus OX=10090 GN=Cct5 PE=1 SV=1	1.45	0.445162
Idh1_K406	Idh1	LGENLK*AK	IDHC_MOUSE Isocitrate dehydrogenase [NADP] cytoplasmic OS=Mus musculus OX=10090 GN=Idh1 PE=1 SV=2	1.44667	0.399423
Hsp90aa1_K74	Hsp90aa1	LDSGK*ELHINLIPSK	HS90A_MOUSE Heat shock protein HSP 90-alpha OS=Mus musculus OX=10090 GN=Hsp90aa1 PE=1 SV=4	1.446	0.293312
Lrpprc_K701	Lrpprc	ALEVK*AK	LPPRC_MOUSE Leucine-rich PPR motif-containing protein, mitochondrial OS=Mus musculus OX=10090 GN=Lrpprc PE=1 SV=2	1.445
Eif4e_K212	Eif4e	SGSTTK*NR	IF4E_MOUSE Eukaryotic translation initiation factor 4E OS=Mus musculus OX=10090 GN=Eif4e PE=1 SV=1	1.445	0.160996
Glrx3_K324	Glrx3	ELK*DNGELLPILK	GLRX3_MOUSE Glutaredoxin-3 OS=Mus musculus OX=10090 GN=Glrx3 PE=1 SV=1	1.445	0.298022
Snapin_K115	Snapin	LNHSVAK*ETAR	SNAPN_MOUSE SNARE-associated protein Snapin OS=Mus musculus OX=10090 GN=Snapin PE=1 SV=1	1.445	0.540154
Hspd1_K523	Hspd1	GIIDPTK*VVR	CH60_MOUSE 60 kDa heat shock protein, mitochondrial OS=Mus musculus OX=10090 GN=Hspd1 PE=1 SV=1	1.4425	0.198799
Pum1_K870	Pum1	FIQLK*LER	PUM1_MOUSE Pumilio homolog 1 OS=Mus musculus OX=10090 GN=Pum1 PE=1 SV=2	1.44	0.221777
Rpl24_K131	Rpl24	TAMAAAK*APTK	RL24_MOUSE 60S ribosomal protein L24 OS=Mus musculus OX=10090 GN=Rpl24 PE=1 SV=2	1.44
Map2k2_K391	Map2k2	LK*QPSTPTR	MP2K2_MOUSE Dual specificity mitogen-activated protein kinase kinase 2 OS=Mus musculus OX=10090 GN=Map2k2 PE=1 SV=2	1.44
Stk26_K266	Stk26	PTAK*ELLK	STK26_MOUSE Serine/threonine-protein kinase 26 OS=Mus musculus OX=10090 GN=Stk26 PE=1 SV=1	1.44
Hsph1_K750	Hsph1	YNHIDESEMK*K	HS105_MOUSE Heat shock protein 105 kDa OS=Mus musculus OX=10090 GN=Hsph1 PE=1 SV=2	1.44
Mthfd1l_K515	Mthfd1l	ILHESTQTDK*ALYNR	C1TM_MOUSE Monofunctional C1-tetrahydrofolate synthase, mitochondrial OS=Mus musculus OX=10090 GN=Mthfd1l PE=1 SV=2	1.44
Rtn4_K1149	Rtn4	DAMAK*IQAK	RTN4_MOUSE Reticulon-4 OS=Mus musculus OX=10090 GN=Rtn4 PE=1 SV=2	1.44
Tpm3_K162	Tpm3	HIAEEADRK*YEEVAR	TPM3_MOUSE Tropomyosin alpha-3 chain OS=Mus musculus OX=10090 GN=Tpm3 PE=1 SV=3	1.44
Samsn1_K169	Samsn1	AK*VHTDFTPSPYDTDSLK	SAMN1_MOUSE SAM domain-containing protein SAMSN-1 OS=Mus musculus OX=10090 GN=Samsn1 PE=1 SV=2	1.44
Tars1_K318	Tars1	FQEEAK*NR	SYTC_MOUSE Threonine--tRNA ligase 1, cytoplasmic OS=Mus musculus OX=10090 GN=Tars1 PE=1 SV=2	1.44
Arhgef1_K286	Arhgef1	HLK*VEADAEKPGPADR	ARHG1_MOUSE Rho guanine nucleotide exchange factor 1 OS=Mus musculus OX=10090 GN=Arhgef1 PE=1 SV=2	1.44	0.0862743
Sf3b1_K522	Sf3b1	QITDK*AR	SF3B1_MOUSE Splicing factor 3B subunit 1 OS=Mus musculus OX=10090 GN=Sf3b1 PE=1 SV=1	1.44	0.128443
Tln1_K441	Tln1	VGK*VEHGSVALPAIMR	TLN1_MOUSE Talin-1 OS=Mus musculus OX=10090 GN=Tln1 PE=1 SV=2	1.43667	0.110447
Numa1_K443	Numa1	GK*QEAQLLAER	NUMA1_MOUSE Nuclear mitotic apparatus protein 1 OS=Mus musculus OX=10090 GN=Numa1 PE=1 SV=1	1.43643	0.11716
Hmgb2_K3	Hmgb2	GK*GDPNKPR	HMGB2_MOUSE High mobility group protein B2 OS=Mus musculus OX=10090 GN=Hmgb2 PE=1 SV=3	1.43571	0.192888
Ptpn6_K551	Ptpn6	SAHAK*ASR	PTN6_MOUSE Tyrosine-protein phosphatase non-receptor type 6 OS=Mus musculus OX=10090 GN=Ptpn6 PE=1 SV=2	1.435	0.0962869
Hck_K26	Hck	MGCVK*SR	HCK_MOUSE Tyrosine-protein kinase HCK OS=Mus musculus OX=10090 GN=Hck PE=1 SV=4	1.435	0.0656153
Rpl7a_K26	Rpl7a	K*VVNPLFEK	RL7A_MOUSE 60S ribosomal protein L7a OS=Mus musculus OX=10090 GN=Rpl7a PE=1 SV=2	1.435	0.178136
Nucks1_K102	Nucks1	AASK*QR	NUCKS_MOUSE Nuclear ubiquitous casein and cyclin-dependent kinase substrate 1 OS=Mus musculus OX=10090 GN=Nucks1 PE=1 SV=1	1.435	0.337546
Lbr_K5	Lbr	K*FVEGEVVR	LBR_MOUSE Delta(14)-sterol reductase LBR OS=Mus musculus OX=10090 GN=Lbr PE=1 SV=2	1.43333	0.272709
Eif4g1_K1185	Eif4g1	TPATK*R	IF4G1_MOUSE Eukaryotic translation initiation factor 4 gamma 1 OS=Mus musculus OX=10090 GN=Eif4g1 PE=1 SV=1	1.4325	0.168877
Khdrbs1_K21	Khdrbs1	SCSK*DPSGAHPSVR	KHDR1_MOUSE KH domain-containing, RNA-binding, signal transduction-associated protein 1 OS=Mus musculus OX=10090 GN=Khdrbs1 PE=1 SV=2	1.43187	0.106611
Baz1b_K231	Baz1b	LQNEDK*IISNVPADSLIR	BAZ1B_MOUSE Tyrosine-protein kinase BAZ1B OS=Mus musculus OX=10090 GN=Baz1b PE=1 SV=2	1.43
Pum3_K568	Pum3	MK*ESGK	PUM3_MOUSE Pumilio homolog 3 OS=Mus musculus OX=10090 GN=Pum3 PE=1 SV=2	1.43
Akap8_K513	Akap8	LAAEQFK*K	AKAP8_MOUSE A-kinase anchor protein 8 OS=Mus musculus OX=10090 GN=Akap8 PE=1 SV=1	1.43
Spats2_K460	Spats2	AQSQK*TADPSNPGR	SPAS2_MOUSE Spermatogenesis-associated serine-rich protein 2 OS=Mus musculus OX=10090 GN=Spats2 PE=1 SV=1	1.43
Nudc_K268	Nudc	LVTSDPEINTK*K	NUDC_MOUSE Nuclear migration protein nudC OS=Mus musculus OX=10090 GN=Nudc PE=1 SV=1	1.43
Khsrp_K360	Khsrp	IQFK*QDDGTGPEK	FUBP2_MOUSE Far upstream element-binding protein 2 OS=Mus musculus OX=10090 GN=Khsrp PE=1 SV=2	1.43
Arhgef7_K221	Arhgef7	EIK*PSEK	ARHG7_MOUSE Rho guanine nucleotide exchange factor 7 OS=Mus musculus OX=10090 GN=Arhgef7 PE=1 SV=2	1.43
Numa1_K1917	Numa1	VCPPHLK*TCYPLESR	NUMA1_MOUSE Nuclear mitotic apparatus protein 1 OS=Mus musculus OX=10090 GN=Numa1 PE=1 SV=1	1.43	0.168737
Rpl10_K121	Rpl10	GAFGK*PQGTVAR	RL10_MOUSE 60S ribosomal protein L10 OS=Mus musculus OX=10090 GN=Rpl10 PE=1 SV=3	1.42938	0.0730889
Actb_K113	Actb	VAPEEHPVLLTEAPLNPK*ANR	ACTB_MOUSE Actin, cytoplasmic 1 OS=Mus musculus OX=10090 GN=Actb PE=1 SV=1	1.42938	0.0561293
Smc2_K320	Smc2	SQSAFDLK*K	SMC2_MOUSE Structural maintenance of chromosomes protein 2 OS=Mus musculus OX=10090 GN=Smc2 PE=1 SV=2	1.42667	0.313137
Mecr_K248	Mecr	MPETK*TIFK	MECR_MOUSE Enoyl-[acyl-carrier-protein] reductase, mitochondrial OS=Mus musculus OX=10090 GN=Mecr PE=1 SV=2	1.42571	0.113727
Acly_K1070	Acly	LK*QGLYR	ACLY_MOUSE ATP-citrate synthase OS=Mus musculus OX=10090 GN=Acly PE=1 SV=1	1.425
Shmt2_K269	Shmt2	VIPSPFK*YADVVTTTTHK	GLYM_MOUSE Serine hydroxymethyltransferase, mitochondrial OS=Mus musculus OX=10090 GN=Shmt2 PE=1 SV=1	1.42417	0.0117238
Nasp_K684	Nasp	K*PTDGASSSNCVTDISHLVR	NASP_MOUSE Nuclear autoantigenic sperm protein OS=Mus musculus OX=10090 GN=Nasp PE=1 SV=2	1.42417	0.0935767
Rtn3_K950	Rtn3	SIVEK*IQAK	RTN3_MOUSE Reticulon-3 OS=Mus musculus OX=10090 GN=Rtn3 PE=1 SV=2	1.42333	0.184135
Npm1_K221	Npm1	SK*GQESFK	NPM_MOUSE Nucleophosmin OS=Mus musculus OX=10090 GN=Npm1 PE=1 SV=1	1.42188	0.077408
Tmem109_K215	Tmem109	SSGSHLEAK*VR	TM109_MOUSE Transmembrane protein 109 OS=Mus musculus OX=10090 GN=Tmem109 PE=1 SV=2	1.42071	0.17361
Ncf2_K170	Ncf2	QK*LFEPVVIPVGR	NCF2_MOUSE Neutrophil cytosol factor 2 OS=Mus musculus OX=10090 GN=Ncf2 PE=1 SV=1	1.42
Hmga1_K71	Hmga1	GAAK*TR	HMGA1_MOUSE High mobility group protein HMG-I/HMG-Y OS=Mus musculus OX=10090 GN=Hmga1 PE=1 SV=4	1.42
Rab3gap2_K959	Rab3gap2	CANK*ER	RBGPR_MOUSE Rab3 GTPase-activating protein non-catalytic subunit OS=Mus musculus OX=10090 GN=Rab3gap2 PE=1 SV=2	1.42
Uba6_K544	Uba6	IDAHLNK*VCPATESIYSDEFYTK	UBA6_MOUSE Ubiquitin-like modifier-activating enzyme 6 OS=Mus musculus OX=10090 GN=Uba6 PE=1 SV=1	1.42
Atp5f1a_K123	Atp5f1a	GMSLNLEPDNVGVVVFGNDK*LIK	ATPA_MOUSE ATP synthase subunit alpha, mitochondrial OS=Mus musculus OX=10090 GN=Atp5f1a PE=1 SV=1	1.42
Sntg2_K238	Sntg2	AGTEK*LR	SNTG2_MOUSE Gamma-2-syntrophin OS=Mus musculus OX=10090 GN=Sntg2 PE=1 SV=1	1.42
Ranbp1_K172	Ranbp1	KGPGK*NDNAEK	RANG_MOUSE Ran-specific GTPase-activating protein OS=Mus musculus OX=10090 GN=Ranbp1 PE=1 SV=2	1.42	0.0282345
Rsl24d1_K141	Rsl24d1	APLAGK*GK	RLP24_MOUSE Probable ribosome biogenesis protein RLP24 OS=Mus musculus OX=10090 GN=Rsl24d1 PE=2 SV=1	1.42	0.218375
Cstf2_K189	Cstf2	IVDPEIALK*ILHR	CSTF2_MOUSE Cleavage stimulation factor subunit 2 OS=Mus musculus OX=10090 GN=Cstf2 PE=1 SV=2	1.42	0.272393
Kif20a_K748	Kif20a	TELQK*LGQSLQSAER	KI20A_MOUSE Kinesin-like protein KIF20A OS=Mus musculus OX=10090 GN=Kif20a PE=1 SV=1	1.415	0.113819
Acp1_K103	Acp1	K*SNQVK	PPAC_MOUSE Low molecular weight phosphotyrosine protein phosphatase OS=Mus musculus OX=10090 GN=Acp1 PE=1 SV=3	1.41333	0.1557
Glud1_K480	Glud1	FGK*HGGTIPVVPTAEFQDR	DHE3_MOUSE Glutamate dehydrogenase 1, mitochondrial OS=Mus musculus OX=10090 GN=Glud1 PE=1 SV=1	1.41125	0.12904
Ncl_K110	Ncl	K*GAAQAK	NUCL_MOUSE Nucleolin OS=Mus musculus OX=10090 GN=Ncl PE=1 SV=2	1.41083	0.146355
Slc25a5_K166	Slc25a5	IYK*SDGIK	ADT2_MOUSE ADP/ATP translocase 2 OS=Mus musculus OX=10090 GN=Slc25a5 PE=1 SV=3	1.41063	0.0788765
Prdx5_K79	Prdx5	VNLAELFK*GK	PRDX5_MOUSE Peroxiredoxin-5, mitochondrial OS=Mus musculus OX=10090 GN=Prdx5 PE=1 SV=2	1.41
Gad1_K540	Gad1	VAPK*IK	DCE1_MOUSE Glutamate decarboxylase 1 OS=Mus musculus OX=10090 GN=Gad1 PE=1 SV=2	1.41
Rnf213_K4345	Rnf213	SPNGSLHPEAK*QLEAVNK	RN213_MOUSE E3 ubiquitin-protein ligase RNF213 OS=Mus musculus OX=10090 GN=Rnf213 PE=1 SV=2	1.41
Npm3_K169	Npm3	LCGILPAK*K	NPM3_MOUSE Nucleoplasmin-3 OS=Mus musculus OX=10090 GN=Npm3 PE=1 SV=3	1.41
Prpf8_K847	Prpf8	LK*EAYSVK	PRP8_MOUSE Pre-mRNA-processing-splicing factor 8 OS=Mus musculus OX=10090 GN=Prpf8 PE=1 SV=2	1.41
Chmp2a_K9	Chmp2a	K*TPEELLR	CHM2A_MOUSE Charged multivesicular body protein 2a OS=Mus musculus OX=10090 GN=Chmp2a PE=1 SV=1	1.41
env_K213	env	DNK*WCNPLVIR	ENV_MLVMS Envelope glycoprotein OS=Moloney murine leukemia virus (isolate Shinnick) OX=928306 GN=env PE=1 SV=1	1.41
Serbp1_K68	Serbp1	SAAQAAAQTNSNAAGK*QLR	PAIRB_MOUSE Plasminogen activator inhibitor 1 RNA-binding protein OS=Mus musculus OX=10090 GN=Serbp1 PE=1 SV=2	1.41	0.0864619
Hspd1_K75	Hspd1	VTK*DGVTVAK	CH60_MOUSE 60 kDa heat shock protein, mitochondrial OS=Mus musculus OX=10090 GN=Hspd1 PE=1 SV=1	1.41	0.110551
Nub1_K364	Nub1	EYLNK*AR	NUB1_MOUSE NEDD8 ultimate buster 1 OS=Mus musculus OX=10090 GN=Nub1 PE=1 SV=2	1.409	0.0615771
Hdac1_K412	Hdac1	ISICSSDK*R	HDAC1_MOUSE Histone deacetylase 1 OS=Mus musculus OX=10090 GN=Hdac1 PE=1 SV=1	1.40417	0.142207
Mms19_K536	Mms19	LAEELHK*GESDVAR	MMS19_MOUSE MMS19 nucleotide excision repair protein homolog OS=Mus musculus OX=10090 GN=Mms19 PE=1 SV=1	1.40375	0.257103
Ncl_K95	Ncl	AVATPAK*K	NUCL_MOUSE Nucleolin OS=Mus musculus OX=10090 GN=Ncl PE=1 SV=2	1.40333	0.195373
Lbr_K64	Lbr	K*SGSISSSPSR	LBR_MOUSE Delta(14)-sterol reductase LBR OS=Mus musculus OX=10090 GN=Lbr PE=1 SV=2	1.4	0.261115
Rmi1_K439	Rmi1	K*LDLSEK	RMI1_MOUSE RecQ-mediated genome instability protein 1 OS=Mus musculus OX=10090 GN=Rmi1 PE=2 SV=1	1.4
Coro1a_K339	Coro1a	FYK*LHER	COR1A_MOUSE Coronin-1A OS=Mus musculus OX=10090 GN=Coro1a PE=1 SV=5	1.4
Esyt1_K187	Esyt1	IIGVK*VHPSQR	ESYT1_MOUSE Extended synaptotagmin-1 OS=Mus musculus OX=10090 GN=Esyt1 PE=1 SV=2	1.4
Nop58_K418	Nop58	AEK*YEHK	NOP58_MOUSE Nucleolar protein 58 OS=Mus musculus OX=10090 GN=Nop58 PE=1 SV=1	1.4
Rbm3_K84	Rbm3	VDHAGK*SAR	RBM3_MOUSE RNA-binding protein 3 OS=Mus musculus OX=10090 GN=Rbm3 PE=1 SV=1	1.4
Hspd1_K196	Hspd1	K*GVITVK	CH60_MOUSE 60 kDa heat shock protein, mitochondrial OS=Mus musculus OX=10090 GN=Hspd1 PE=1 SV=1	1.39833	0.13725
Psma5_K91	Psma5	TLIDK*AR	PSA5_MOUSE Proteasome subunit alpha type-5 OS=Mus musculus OX=10090 GN=Psma5 PE=1 SV=1	1.398	0.190065
S100a4_K57	S100a4	TDEAAFQK*VMSNLDSNR	S10A4_MOUSE Protein S100-A4 OS=Mus musculus OX=10090 GN=S100a4 PE=1 SV=1	1.39563	0.143045
Hnrnpu_K611	Hnrnpu	DLPEHAVLK*MK	HNRPU_MOUSE Heterogeneous nuclear ribonucleoprotein U OS=Mus musculus OX=10090 GN=Hnrnpu PE=1 SV=1	1.395	0.137287
Hnrnpk_K52	Hnrnpk	ILLQSK*NAGAVIGK	HNRPK_MOUSE Heterogeneous nuclear ribonucleoprotein K OS=Mus musculus OX=10090 GN=Hnrnpk PE=1 SV=1	1.395	0.385814
Tln1_K2024	Tln1	TAK*VLVEDTK	TLN1_MOUSE Talin-1 OS=Mus musculus OX=10090 GN=Tln1 PE=1 SV=2	1.3925	0.490523
Hspa9_K567	Hspa9	NAEK*YAEEDRR	GRP75_MOUSE Stress-70 protein, mitochondrial OS=Mus musculus OX=10090 GN=Hspa9 PE=1 SV=3	1.3925	0.132642
Oas1a_K72	Oas1a	GTTLK*GK	OAS1A_MOUSE 2'-5'-oligoadenylate synthase 1A OS=Mus musculus OX=10090 GN=Oas1a PE=1 SV=2	1.39	0.144382
Kif4_K704	Kif4	K*TEEAAAANKR	KIF4_MOUSE Chromosome-associated kinesin KIF4 OS=Mus musculus OX=10090 GN=Kif4 PE=1 SV=3	1.39
Washc4_K240	Washc4	LQEEK*IK	WASC4_MOUSE WASH complex subunit 4 OS=Mus musculus OX=10090 GN=Washc4 PE=1 SV=2	1.39
Actn1_K327	Actn1	LHKPPK*VQEK	ACTN1_MOUSE Alpha-actinin-1 OS=Mus musculus OX=10090 GN=Actn1 PE=1 SV=1	1.39
Rpl4_K367	Rpl4	SEK*VVPEK	RL4_MOUSE 60S ribosomal protein L4 OS=Mus musculus OX=10090 GN=Rpl4 PE=1 SV=3	1.39
Atp5pf_K79	Atp5pf	LK*QMYGK	ATP5J_MOUSE ATP synthase-coupling factor 6, mitochondrial OS=Mus musculus OX=10090 GN=Atp5pf PE=1 SV=1	1.39
Cc2d2a_K448	Cc2d2a	TK*FLTDK	C2D2A_MOUSE Coiled-coil and C2 domain-containing protein 2A OS=Mus musculus OX=10090 GN=Cc2d2a PE=1 SV=1	1.39
Gfm1_K541	Gfm1	K*QSGGAGQFGK	EFGM_MOUSE Elongation factor G, mitochondrial OS=Mus musculus OX=10090 GN=Gfm1 PE=1 SV=1	1.39
Usp14_K300	Usp14	LQEEITK*QSPTLQR	UBP14_MOUSE Ubiquitin carboxyl-terminal hydrolase 14 OS=Mus musculus OX=10090 GN=Usp14 PE=1 SV=3	1.39
Plec_K4147	Plec	DK*LLSAER	PLEC_MOUSE Plectin OS=Mus musculus OX=10090 GN=Plec PE=1 SV=3	1.39	0.0162451
S100a10_K57	S100a10	IMK*DLDQCR	S10AA_MOUSE Protein S100-A10 OS=Mus musculus OX=10090 GN=S100a10 PE=1 SV=2	1.3875	0.0776417
Bcap31_K189	Bcap31	K*LKDELASTK	BAP31_MOUSE B-cell receptor-associated protein 31 OS=Mus musculus OX=10090 GN=Bcap31 PE=1 SV=4	1.38667	0.23025
Ncl_K15	Ncl	THGEAK*K	NUCL_MOUSE Nucleolin OS=Mus musculus OX=10090 GN=Ncl PE=1 SV=2	1.385	0.5
Plek_K108	Plek	CIEGGQK*FAR	PLEK_MOUSE Pleckstrin OS=Mus musculus OX=10090 GN=Plek PE=1 SV=1	1.385	0.18387
Lyar_K378	Lyar	NPTFK*VLK	LYAR_MOUSE Cell growth-regulating nucleolar protein OS=Mus musculus OX=10090 GN=Lyar PE=1 SV=2	1.38333	0.134359
Eif4g1_K885	Eif4g1	LK*EELEEAR	IF4G1_MOUSE Eukaryotic translation initiation factor 4 gamma 1 OS=Mus musculus OX=10090 GN=Eif4g1 PE=1 SV=1	1.3825	0.175567
Pdia3_K129	Pdia3	TADGIVSHLK*K	PDIA3_MOUSE Protein disulfide-isomerase A3 OS=Mus musculus OX=10090 GN=Pdia3 PE=1 SV=2	1.38125	0.0737412
Rpl23a_K7	Rpl23a	K*EAPAPPK	RL23A_MOUSE 60S ribosomal protein L23a OS=Mus musculus OX=10090 GN=Rpl23a PE=1 SV=1	1.381	0.00996942
Atp5f1a_K167	Atp5f1a	GPIGSK*TR	ATPA_MOUSE ATP synthase subunit alpha, mitochondrial OS=Mus musculus OX=10090 GN=Atp5f1a PE=1 SV=1	1.38063	0.0794619
Me1_K324	Me1	EGLSK*ENAR	MAOX_MOUSE NADP-dependent malic enzyme OS=Mus musculus OX=10090 GN=Me1 PE=1 SV=2	1.38
Inpp5d_K514	Inpp5d	ISHICTDNVK*TGIANTLGNK	SHIP1_MOUSE Phosphatidylinositol 3,4,5-trisphosphate 5-phosphatase 1 OS=Mus musculus OX=10090 GN=Inpp5d PE=1 SV=2	1.38
Pgd_K377	Pgd	IK*DAFER	6PGD_MOUSE 6-phosphogluconate dehydrogenase, decarboxylating OS=Mus musculus OX=10090 GN=Pgd PE=1 SV=3	1.38	0.0996902
Pcbp1_K351	Pcbp1	LSSEK*GMGCS	PCBP1_MOUSE Poly(rC)-binding protein 1 OS=Mus musculus OX=10090 GN=Pcbp1 PE=1 SV=1	1.38	0.272815
Anxa5_K307	Anxa5	GDTSGDYK*K	ANXA5_MOUSE Annexin A5 OS=Mus musculus OX=10090 GN=Anxa5 PE=1 SV=1	1.38	0.539248
Ikzf3_K264	Ikzf3	LASNVAK*R	IKZF3_MOUSE Zinc finger protein Aiolos OS=Mus musculus OX=10090 GN=Ikzf3 PE=1 SV=2	1.379	0.22813
Rpl8_K149	Rpl8	VK*LPSGSK	RL8_MOUSE 60S ribosomal protein L8 OS=Mus musculus OX=10090 GN=Rpl8 PE=1 SV=2	1.37714	0.0269389
Hspa4l_K53	Hspa4l	AIGNAAK*SQIVTNVR	HS74L_MOUSE Heat shock 70 kDa protein 4L OS=Mus musculus OX=10090 GN=Hspa4l PE=1 SV=2	1.377	0.245295
Rpl37a_K28	Rpl37a	K*IEISQHAK	RL37A_MOUSE 60S ribosomal protein L37a OS=Mus musculus OX=10090 GN=Rpl37a PE=1 SV=2	1.37667	0.00956897
Sumo2_K11	Sumo2	EGVK*TENNDHINLK	SUMO2_MOUSE Small ubiquitin-related modifier 2 OS=Mus musculus OX=10090 GN=Sumo2 PE=1 SV=1	1.37667	0.159153
Plek_K39	Plek	K*SDNSPK	PLEK_MOUSE Pleckstrin OS=Mus musculus OX=10090 GN=Plek PE=1 SV=1	1.37667	0.266067
Rpn1_K539	Rpn1	LK*TEGSDLCDR	RPN1_MOUSE Dolichyl-diphosphooligosaccharide--protein glycosyltransferase subunit 1 OS=Mus musculus OX=10090 GN=Rpn1 PE=1 SV=1	1.37625	0.099861
Ktn1_K719	Ktn1	K*LQTAVSQQPNK	KTN1_MOUSE Kinectin OS=Mus musculus OX=10090 GN=Ktn1 PE=1 SV=1	1.375
Gatad2b_K463	Gatad2b	LK*NAFVK	P66B_MOUSE Transcriptional repressor p66-beta OS=Mus musculus OX=10090 GN=Gatad2b PE=1 SV=1	1.375	0.444781
Trim28_K267	Trim28	LGDK*HATLQK	TIF1B_MOUSE Transcription intermediary factor 1-beta OS=Mus musculus OX=10090 GN=Trim28 PE=1 SV=3	1.37429	0.0654408
Lcp1_K294	Lcp1	ITNFSTDIK*DSK	PLSL_MOUSE Plastin-2 OS=Mus musculus OX=10090 GN=Lcp1 PE=1 SV=4	1.374	0.47143
Adsl_K147	Adsl	LADFAK*DR	PUR8_MOUSE Adenylosuccinate lyase OS=Mus musculus OX=10090 GN=Adsl PE=1 SV=2	1.37375	0.245326
Vcp_K288	Vcp	K*AFEEAEK	TERA_MOUSE Transitional endoplasmic reticulum ATPase OS=Mus musculus OX=10090 GN=Vcp PE=1 SV=4	1.37333	0.318995
Anxa5_K95	Anxa5	LYDAYELK*HALK	ANXA5_MOUSE Annexin A5 OS=Mus musculus OX=10090 GN=Anxa5 PE=1 SV=1	1.37286	0.326789
Hcls1_K146	Hcls1	GEVEK*HASQK	HCLS1_MOUSE Hematopoietic lineage cell-specific protein OS=Mus musculus OX=10090 GN=Hcls1 PE=1 SV=2	1.3725	0.305572
Sumo2_K33	Sumo2	VAGQDGSVVQFK*IK	SUMO2_MOUSE Small ubiquitin-related modifier 2 OS=Mus musculus OX=10090 GN=Sumo2 PE=1 SV=1	1.37214	0.108808
Rtn3_K954	Rtn3	IQAK*LPGIAK	RTN3_MOUSE Reticulon-3 OS=Mus musculus OX=10090 GN=Rtn3 PE=1 SV=2	1.37071	0.0356324
Rpl15_K54	Rpl15	LGYK*AK	RL15_MOUSE 60S ribosomal protein L15 OS=Mus musculus OX=10090 GN=Rpl15 PE=1 SV=4	1.37
Adss2_K164	Adss2	K*GIGPVYSSK	PURA2_MOUSE Adenylosuccinate synthetase isozyme 2 OS=Mus musculus OX=10090 GN=Adss2 PE=1 SV=2	1.37
Capzb_K95	Capzb	K*LEVEANNAFDQYR	CAPZB_MOUSE F-actin-capping protein subunit beta OS=Mus musculus OX=10090 GN=Capzb PE=1 SV=3	1.37
Coa7_K211	Coa7	AEVLK*NR	COA7_MOUSE Cytochrome c oxidase assembly factor 7 OS=Mus musculus OX=10090 GN=Coa7 PE=1 SV=1	1.37
Tfam_K153	Tfam	LLGK*PK	TFAM_MOUSE Transcription factor A, mitochondrial OS=Mus musculus OX=10090 GN=Tfam PE=1 SV=2	1.37
Smarca5_K599	Smarca5	IGQTK*TVR	SMCA5_MOUSE SWI/SNF-related matrix-associated actin-dependent regulator of chromatin subfamily A member 5 OS=Mus musculus OX=10090 GN=Smarca5 PE=1 SV=1	1.37
Chordc1_K132	Chordc1	QALDK*LK	CHRD1_MOUSE Cysteine and histidine-rich domain-containing protein 1 OS=Mus musculus OX=10090 GN=Chordc1 PE=1 SV=1	1.37
Eif2s1_K154	Eif2s1	RPGYGAYDAFK*HAVSDPSILDSLDLNEDER	IF2A_MOUSE Eukaryotic translation initiation factor 2 subunit 1 OS=Mus musculus OX=10090 GN=Eif2s1 PE=1 SV=3	1.37
Niban2_K507	Niban2	K*LAPTCK	NIBA2_MOUSE Protein Niban 2 OS=Mus musculus OX=10090 GN=Niban2 PE=1 SV=2	1.37	0.110747
Osbp_K427	Osbp	NCIGK*ELSK	OSBP1_MOUSE Oxysterol-binding protein 1 OS=Mus musculus OX=10090 GN=Osbp PE=1 SV=3	1.37	0.433728
Sec22b_K43	Sec22b	K*LNEQSPTR	SC22B_MOUSE Vesicle-trafficking protein SEC22b OS=Mus musculus OX=10090 GN=Sec22b PE=1 SV=3	1.36833	0.439971
Rnf20_K806	Rnf20	KLEEK*EHLLQSNIGTGEK	BRE1A_MOUSE E3 ubiquitin-protein ligase BRE1A OS=Mus musculus OX=10090 GN=Rnf20 PE=1 SV=2	1.36667	0.228255
Rab5c_K184	Rab5c	KLPK*NEPQNAAGAPGR	RAB5C_MOUSE Ras-related protein Rab-5C OS=Mus musculus OX=10090 GN=Rab5c PE=1 SV=2	1.36625	0.0376146
Rrm2_K46	Rrm2	VLASK*AAR	RIR2_MOUSE Ribonucleoside-diphosphate reductase subunit M2 OS=Mus musculus OX=10090 GN=Rrm2 PE=1 SV=1	1.365	0.0435138
Myh9_K1330	Myh9	LSLSTK*LK	MYH9_MOUSE Myosin-9 OS=Mus musculus OX=10090 GN=Myh9 PE=1 SV=4	1.365	0.225527
Eif2s3x_K421	Eif2s3x	VSAVK*ADLGK	IF2G_MOUSE Eukaryotic translation initiation factor 2 subunit 3, X-linked OS=Mus musculus OX=10090 GN=Eif2s3x PE=1 SV=2	1.365	0.232494
Rps25_K20	Rps25	KDK*DPVNK	RS25_MOUSE 40S ribosomal protein S25 OS=Mus musculus OX=10090 GN=Rps25 PE=1 SV=1	1.365	0.2343
P4hb_K285	P4hb	AAEGFK*GK	PDIA1_MOUSE Protein disulfide-isomerase OS=Mus musculus OX=10090 GN=P4hb PE=1 SV=2	1.365	0.298645
Lrpprc_K291	Lrpprc	QILEK*VEK	LPPRC_MOUSE Leucine-rich PPR motif-containing protein, mitochondrial OS=Mus musculus OX=10090 GN=Lrpprc PE=1 SV=2	1.36333	0.101807
Stx5_K160	Stx5	AK*GSQSGR	STX5_MOUSE Syntaxin-5 OS=Mus musculus OX=10090 GN=Stx5 PE=1 SV=3	1.36333	0.490315
Tmpo_K433	Tmpo	LSEK*PAR	LAP2A_MOUSE Lamina-associated polypeptide 2, isoforms alpha/zeta OS=Mus musculus OX=10090 GN=Tmpo PE=1 SV=4	1.3625	0.315087
Csnk2b_K212	Csnk2b	SPVK*TIR	CSK2B_MOUSE Casein kinase II subunit beta OS=Mus musculus OX=10090 GN=Csnk2b PE=1 SV=1	1.36125	0.252648
Myef2_K512	Myef2	LGSK*GNQIFVR	MYEF2_MOUSE Myelin expression factor 2 OS=Mus musculus OX=10090 GN=Myef2 PE=1 SV=1	1.361	0.193526
Ptpn6_K271	Ptpn6	LEGQRPENK*SK	PTN6_MOUSE Tyrosine-protein phosphatase non-receptor type 6 OS=Mus musculus OX=10090 GN=Ptpn6 PE=1 SV=2	1.36062	0.0714133
Rpl7l1_K226	Rpl7l1	K*EMGSPGYR	RL7L_MOUSE 60S ribosomal protein L7-like 1 OS=Mus musculus OX=10090 GN=Rpl7l1 PE=1 SV=1	1.36
Capg_K30	Capg	LK*PVPIAR	CAPG_MOUSE Macrophage-capping protein OS=Mus musculus OX=10090 GN=Capg PE=1 SV=2	1.36
Btf3_K65	Btf3	IGGK*GTAR	BTF3_MOUSE Transcription factor BTF3 OS=Mus musculus OX=10090 GN=Btf3 PE=1 SV=3	1.36
Coro1a_K393	Coro1a	DAGPLLISLK*DGYVPPK	COR1A_MOUSE Coronin-1A OS=Mus musculus OX=10090 GN=Coro1a PE=1 SV=5	1.36
Rpap3_K217	Rpap3	FALQK*LEDAR	RPAP3_MOUSE RNA polymerase II-associated protein 3 OS=Mus musculus OX=10090 GN=Rpap3 PE=1 SV=1	1.36
Ampd3_K347	Ampd3	TVAEK*LGR	AMPD3_MOUSE AMP deaminase 3 OS=Mus musculus OX=10090 GN=Ampd3 PE=1 SV=2	1.36	0.234211
Pcbp2_K115	Pcbp2	LVVPASQCGSLIGK*GGCK	PCBP2_MOUSE Poly(rC)-binding protein 2 OS=Mus musculus OX=10090 GN=Pcbp2 PE=1 SV=1	1.36	0.122016
Hspa9_K206	Hspa9	QATK*DAGQISGLNVLR	GRP75_MOUSE Stress-70 protein, mitochondrial OS=Mus musculus OX=10090 GN=Hspa9 PE=1 SV=3	1.36	0.266249
Rps13_K94	Rps13	K*AVAVR	RS13_MOUSE 40S ribosomal protein S13 OS=Mus musculus OX=10090 GN=Rps13 PE=1 SV=2	1.36	0.280863
Rpl11_K154	Rpl11	TGCIGAK*HR	RL11_MOUSE 60S ribosomal protein L11 OS=Mus musculus OX=10090 GN=Rpl11 PE=1 SV=4	1.35875	0.263625
Ddx5_K523	Ddx5	GYSNLLK*R	DDX5_MOUSE Probable ATP-dependent RNA helicase DDX5 OS=Mus musculus OX=10090 GN=Ddx5 PE=1 SV=2	1.35857	0.00360618
Eif3i_K264	Eif3i	IGK*FEAR	EIF3I_MOUSE Eukaryotic translation initiation factor 3 subunit I OS=Mus musculus OX=10090 GN=Eif3i PE=1 SV=1	1.35813	0.249958
Hnrnpab_K220	Hnrnpab	K*FHTVSGSK	ROAA_MOUSE Heterogeneous nuclear ribonucleoprotein A/B OS=Mus musculus OX=10090 GN=Hnrnpab PE=1 SV=1	1.3575	0.352842
Txlna_K256	Txlna	SLK*EEGVQR	TXLNA_MOUSE Alpha-taxilin OS=Mus musculus OX=10090 GN=Txlna PE=1 SV=1	1.3575	0.331774
Atp5f1b_K124	Atp5f1b	GQK*VLDSGAPIK	ATPB_MOUSE ATP synthase subunit beta, mitochondrial OS=Mus musculus OX=10090 GN=Atp5f1b PE=1 SV=2	1.35688	0.0544327
Srsf1_K179	Srsf1	KLDNTK*FR	SRSF1_MOUSE Serine/arginine-rich splicing factor 1 OS=Mus musculus OX=10090 GN=Srsf1 PE=1 SV=3	1.355	0.0304784
Ncl_K9	Ncl	AGK*THGEAK	NUCL_MOUSE Nucleolin OS=Mus musculus OX=10090 GN=Ncl PE=1 SV=2	1.355	0.0741806
Mybbp1a_K1073	Mybbp1a	ATQTLQTLGEAQSK*GEHQK	MBB1A_MOUSE Myb-binding protein 1A OS=Mus musculus OX=10090 GN=Mybbp1a PE=1 SV=2	1.355	0.119259
Abce1_K121	Abce1	STALK*ILAGK	ABCE1_MOUSE ATP-binding cassette sub-family E member 1 OS=Mus musculus OX=10090 GN=Abce1 PE=1 SV=1	1.355
Cltc_K1347	Cltc	VNIPK*VLR	CLH1_MOUSE Clathrin heavy chain 1 OS=Mus musculus OX=10090 GN=Cltc PE=1 SV=3	1.355	0.0447358
Ncl_K124	Ncl	ALVPTPGK*K	NUCL_MOUSE Nucleolin OS=Mus musculus OX=10090 GN=Ncl PE=1 SV=2	1.355	0.126545
Pabpc1_K277	Pabpc1	QTELK*R	PABP1_MOUSE Polyadenylate-binding protein 1 OS=Mus musculus OX=10090 GN=Pabpc1 PE=1 SV=2	1.355	0.183074
Tsn_K187	Tsn	LLNLK*NDSLR	TSN_MOUSE Translin OS=Mus musculus OX=10090 GN=Tsn PE=1 SV=1	1.355	0.425155
Atp5f1a_K539	Atp5f1a	ISEQSDAK*LK	ATPA_MOUSE ATP synthase subunit alpha, mitochondrial OS=Mus musculus OX=10090 GN=Atp5f1a PE=1 SV=1	1.35438	0.258698
Rpl18a_K11	Rpl18a	YK*VVGR EYK*VVGR	RL18A_MOUSE 60S ribosomal protein L18a OS=Mus musculus OX=10090 GN=Rpl18a PE=1 SV=1	1.35333	0.267309
Hspa8_K524	Hspa8	MVQEAEK*YK	HSP7C_MOUSE Heat shock cognate 71 kDa protein OS=Mus musculus OX=10090 GN=Hspa8 PE=1 SV=1	1.35313	0.0481236
Ddx5_K32	Ddx5	TGPLSGK*K	DDX5_MOUSE Probable ATP-dependent RNA helicase DDX5 OS=Mus musculus OX=10090 GN=Ddx5 PE=1 SV=2	1.35312	0.143289
Immt_K450	Immt	TFDSAVAK*ALEHHR	MIC60_MOUSE MICOS complex subunit Mic60 OS=Mus musculus OX=10090 GN=Immt PE=1 SV=1	1.3525	0.435564
Eef1a1_K41	Eef1a1	TIEK*FEK	EF1A1_MOUSE Elongation factor 1-alpha 1 OS=Mus musculus OX=10090 GN=Eef1a1 PE=1 SV=3	1.35083	0.0717107
Tln1_K1171	Tln1	K*ASGHPGDPESQQR	TLN1_MOUSE Talin-1 OS=Mus musculus OX=10090 GN=Tln1 PE=1 SV=2	1.35
Luzp1_K466	Luzp1	FAPGSSHSEGK*R	LUZP1_MOUSE Leucine zipper protein 1 OS=Mus musculus OX=10090 GN=Luzp1 PE=1 SV=2	1.35
Ddx21_K222	Ddx21	LK*DGLSQPSEPK	DDX21_MOUSE Nucleolar RNA helicase 2 OS=Mus musculus OX=10090 GN=Ddx21 PE=1 SV=3	1.35
Dhx15_K132	Dhx15	YYDILK*K	DHX15_MOUSE Pre-mRNA-splicing factor ATP-dependent RNA helicase DHX15 OS=Mus musculus OX=10090 GN=Dhx15 PE=1 SV=2	1.35
Tln1_K861	Tln1	LLSAAK*ILADATAK	TLN1_MOUSE Talin-1 OS=Mus musculus OX=10090 GN=Tln1 PE=1 SV=2	1.35
_K35		K*AVQQSGDK	CR032_MOUSE UPF0729 protein C18orf32 homolog OS=Mus musculus OX=10090 PE=3 SV=1	1.35
Rrp12_K672	Rrp12	TLITK*GCEAEADR	RRP12_MOUSE RRP12-like protein OS=Mus musculus OX=10090 GN=Rrp12 PE=1 SV=1	1.35
Serp1_K13	Serp1	MANEK*HSK	SERP1_MOUSE Stress-associated endoplasmic reticulum protein 1 OS=Mus musculus OX=10090 GN=Serp1 PE=3 SV=1	1.35
G6pdx_K386	G6pdx	DVAGDIFHQQCK*R	G6PD1_MOUSE Glucose-6-phosphate 1-dehydrogenase X OS=Mus musculus OX=10090 GN=G6pdx PE=1 SV=3	1.35
H1-2_K121	H1-2	AASGEAKPQAK*K	H12_MOUSE Histone H1.2 OS=Mus musculus OX=10090 GN=H1-2 PE=1 SV=2	1.35	0.295713
Stip1_K100	Stip1	TYEEGLK*HEANNLQLK	STIP1_MOUSE Stress-induced-phosphoprotein 1 OS=Mus musculus OX=10090 GN=Stip1 PE=1 SV=1	1.35	0.357247
Tpm4_K13	Tpm4	K*IQALQQQADDAEDR	TPM4_MOUSE Tropomyosin alpha-4 chain OS=Mus musculus OX=10090 GN=Tpm4 PE=1 SV=3	1.35	0.659141
Eef1a1_K453	Eef1a1	VTK*SAQK	EF1A1_MOUSE Elongation factor 1-alpha 1 OS=Mus musculus OX=10090 GN=Eef1a1 PE=1 SV=3	1.34833	0.0513066
Ddx58_K808	Ddx58	K*LLCGK	DDX58_MOUSE Antiviral innate immune response receptor RIG-I OS=Mus musculus OX=10090 GN=Ddx58 PE=1 SV=2	1.34833	0.173073
Hspd1_K364	Hspd1	GDK*AHIEK	CH60_MOUSE 60 kDa heat shock protein, mitochondrial OS=Mus musculus OX=10090 GN=Hspd1 PE=1 SV=1	1.347	0.254336
Pik3ap1_K561	Pik3ap1	VFAEK*SQER	BCAP_MOUSE Phosphoinositide 3-kinase adapter protein 1 OS=Mus musculus OX=10090 GN=Pik3ap1 PE=1 SV=1	1.34667	0.289104
H3c1_K28	H3c1	K*SAPATGGVK	H31_MOUSE Histone H3.1 OS=Mus musculus OX=10090 GN=H3c1 PE=1 SV=2	1.34571	0.0543093
Myh9_K1775	Myh9	SHAQK*NENAR	MYH9_MOUSE Myosin-9 OS=Mus musculus OX=10090 GN=Myh9 PE=1 SV=4	1.345	0.0382073
Got2_K82	Got2	K*AEAQIAAK	AATM_MOUSE Aspartate aminotransferase, mitochondrial OS=Mus musculus OX=10090 GN=Got2 PE=1 SV=1	1.345	0.192791
Uso1_K47	Uso1	ALK*SLSK	USO1_MOUSE General vesicular transport factor p115 OS=Mus musculus OX=10090 GN=Uso1 PE=1 SV=2	1.345	0.471083
Hspa8_K188	Hspa8	K*VGAER	HSP7C_MOUSE Heat shock cognate 71 kDa protein OS=Mus musculus OX=10090 GN=Hspa8 PE=1 SV=1	1.345	0.0289491
Nop58_K99	Nop58	LGGVIK*EK	NOP58_MOUSE Nucleolar protein 58 OS=Mus musculus OX=10090 GN=Nop58 PE=1 SV=1	1.345	0.279834
Sfpq_K551	Sfpq	MEELHSQEMQK*R	SFPQ_MOUSE Splicing factor, proline- and glutamine-rich OS=Mus musculus OX=10090 GN=Sfpq PE=1 SV=1	1.344	0.0332037
Rpl27a_K92	Rpl27a	VNAAK*NK	RL27A_MOUSE 60S ribosomal protein L27a OS=Mus musculus OX=10090 GN=Rpl27a PE=1 SV=5	1.344	0.190235
Lrrc59_K71	Lrrc59	LDLSK*NK	LRC59_MOUSE Leucine-rich repeat-containing protein 59 OS=Mus musculus OX=10090 GN=Lrrc59 PE=1 SV=1	1.34188	0.0490858
Hspd1_K133	Hspd1	ISK*GANPVEIR	CH60_MOUSE 60 kDa heat shock protein, mitochondrial OS=Mus musculus OX=10090 GN=Hspd1 PE=1 SV=1	1.34062	0.208884
Mdh2_K307	Mdh2	NLGIGK*ITPFEEK	MDHM_MOUSE Malate dehydrogenase, mitochondrial OS=Mus musculus OX=10090 GN=Mdh2 PE=1 SV=3	1.34
Mcm4_K266	Mcm4	PFNALK*TK	MCM4_MOUSE DNA replication licensing factor MCM4 OS=Mus musculus OX=10090 GN=Mcm4 PE=1 SV=1	1.34
Cct7_K135	Cct7	TATQLAVNK*IK	TCPH_MOUSE T-complex protein 1 subunit eta OS=Mus musculus OX=10090 GN=Cct7 PE=1 SV=1	1.34
Rpl7a_K150	Rpl7a	AGVNTVTTLVENK*K	RL7A_MOUSE 60S ribosomal protein L7a OS=Mus musculus OX=10090 GN=Rpl7a PE=1 SV=2	1.34
Top2a_K1138	Top2a	EKK*DELCK	TOP2A_MOUSE DNA topoisomerase 2-alpha OS=Mus musculus OX=10090 GN=Top2a PE=1 SV=2	1.34
Suclg1_K48	Suclg1	K*HIYIDK	SUCA_MOUSE Succinate--CoA ligase [ADP/GDP-forming] subunit alpha, mitochondrial OS=Mus musculus OX=10090 GN=Suclg1 PE=1 SV=4	1.34
Uba6_K800	Uba6	IEEFKPSNK*VVQTDETAR	UBA6_MOUSE Ubiquitin-like modifier-activating enzyme 6 OS=Mus musculus OX=10090 GN=Uba6 PE=1 SV=1	1.34
Psma3_K192	Psma3	DVVK*EVAK	PSA3_MOUSE Proteasome subunit alpha type-3 OS=Mus musculus OX=10090 GN=Psma3 PE=1 SV=3	1.34
Nop2_K456	Nop2	VLLDAPCSGTGVISK*DPAVK	NOP2_MOUSE Probable 28S rRNA (cytosine-C(5))-methyltransferase OS=Mus musculus OX=10090 GN=Nop2 PE=1 SV=1	1.34
Smc2_K804	Smc2	TK*ADASSK	SMC2_MOUSE Structural maintenance of chromosomes protein 2 OS=Mus musculus OX=10090 GN=Smc2 PE=1 SV=2	1.34	0.0373732
Gars1_K89	Gars1	AVAELK*AR	GARS_MOUSE Glycine--tRNA ligase OS=Mus musculus OX=10090 GN=Gars1 PE=1 SV=1	1.34	0.132515
Khdrbs1_K432	Khdrbs1	PVK*GAYR	KHDR1_MOUSE KH domain-containing, RNA-binding, signal transduction-associated protein 1 OS=Mus musculus OX=10090 GN=Khdrbs1 PE=1 SV=2	1.33875	0.024177
Plec_K2910	Plec	EGVVGPELHHK*LLSAER	PLEC_MOUSE Plectin OS=Mus musculus OX=10090 GN=Plec PE=1 SV=3	1.33833	0.13656
Npm1_K150	Npm1	SAPGGGNK*VPQK	NPM_MOUSE Nucleophosmin OS=Mus musculus OX=10090 GN=Npm1 PE=1 SV=1	1.33813	0.0271515
Filip1l_K147	Filip1l	VVEK*HK	FIL1L_MOUSE Filamin A-interacting protein 1-like OS=Mus musculus OX=10090 GN=Filip1l PE=1 SV=2	1.33667	0.327249
Rps13_K39	Rps13	EQIYK*LAK	RS13_MOUSE 40S ribosomal protein S13 OS=Mus musculus OX=10090 GN=Rps13 PE=1 SV=2	1.335	0.323171
Pgd_K261	Pgd	DSAGQK*GTGK	6PGD_MOUSE 6-phosphogluconate dehydrogenase, decarboxylating OS=Mus musculus OX=10090 GN=Pgd PE=1 SV=3	1.335
Msn_K72	Msn	K*ESPLLFK	MOES_MOUSE Moesin OS=Mus musculus OX=10090 GN=Msn PE=1 SV=3	1.335	0.197589
Hcfc1_K288	Hcfc1	VATHEK*EWK	HCFC1_MOUSE Host cell factor 1 OS=Mus musculus OX=10090 GN=Hcfc1 PE=1 SV=2	1.335	0.288757
Prpf19_K192	Prpf19	GK*TVPEELVKPEELSK	PRP19_MOUSE Pre-mRNA-processing factor 19 OS=Mus musculus OX=10090 GN=Prpf19 PE=1 SV=1	1.335	0.299098
Rps18_K150	Rps18	TVGVSK*K	RS18_MOUSE 40S ribosomal protein S18 OS=Mus musculus OX=10090 GN=Rps18 PE=1 SV=3	1.334	0.217824
G6pdx_K432	G6pdx	NVK*LPDAYER	G6PD1_MOUSE Glucose-6-phosphate 1-dehydrogenase X OS=Mus musculus OX=10090 GN=G6pdx PE=1 SV=3	1.33333	0.0728799
S100a6_K26	S100a6	EGDK*HTLSK	S10A6_MOUSE Protein S100-A6 OS=Mus musculus OX=10090 GN=S100a6 PE=1 SV=3	1.33333	0.155123
Cacybp_K35	Cacybp	DTLTSEK*SK	CYBP_MOUSE Calcyclin-binding protein OS=Mus musculus OX=10090 GN=Cacybp PE=1 SV=1	1.33333	0.653691
Plek_K101	Plek	AIK*CIEGGQK	PLEK_MOUSE Pleckstrin OS=Mus musculus OX=10090 GN=Plek PE=1 SV=1	1.333	0.192424
Stat1_K145	Stat1	ELDSK*VR	STAT1_MOUSE Signal transducer and activator of transcription 1 OS=Mus musculus OX=10090 GN=Stat1 PE=1 SV=1	1.3325	0.606427
Hnrnpa2b1_K104	Hnrnpa2b1	EESGK*PGAHVTVK	ROA2_MOUSE Heterogeneous nuclear ribonucleoproteins A2/B1 OS=Mus musculus OX=10090 GN=Hnrnpa2b1 PE=1 SV=2	1.33214	0.106867
Rpl7a_K97	Rpl7a	QTATQLLK*LAHK	RL7A_MOUSE 60S ribosomal protein L7a OS=Mus musculus OX=10090 GN=Rpl7a PE=1 SV=2	1.33125	0.399371
Mdh1_K236	Mdh1	GAAVIK*AR	MDHC_MOUSE Malate dehydrogenase, cytoplasmic OS=Mus musculus OX=10090 GN=Mdh1 PE=1 SV=3	1.33
Bin1_K32	Bin1	VLQK*LGK	BIN1_MOUSE Myc box-dependent-interacting protein 1 OS=Mus musculus OX=10090 GN=Bin1 PE=1 SV=1	1.33
Rps17_K32	Rps17	LGNDFHTNK*R	RS17_MOUSE 40S ribosomal protein S17 OS=Mus musculus OX=10090 GN=Rps17 PE=1 SV=2	1.33
Cct3_K249	Cct3	K*GESQTDIEITR	TCPG_MOUSE T-complex protein 1 subunit gamma OS=Mus musculus OX=10090 GN=Cct3 PE=1 SV=1	1.33	0.0418313
Hsp90b1_K405	Hsp90b1	K*SDYIK	ENPL_MOUSE Endoplasmin OS=Mus musculus OX=10090 GN=Hsp90b1 PE=1 SV=2	1.33	0.390273
Eno1_K126	Eno1	AGAVEK*GVPLYR	ENOA_MOUSE Alpha-enolase OS=Mus musculus OX=10090 GN=Eno1 PE=1 SV=3	1.33	0.544758
Psmc4_K330	Psmc4	K*IEFPLPDR	PRS6B_MOUSE 26S proteasome regulatory subunit 6B OS=Mus musculus OX=10090 GN=Psmc4 PE=1 SV=2	1.33	0.590334
Eef2_K571	Eef2	DLEEDHACIPIK*K	EF2_MOUSE Elongation factor 2 OS=Mus musculus OX=10090 GN=Eef2 PE=1 SV=2	1.33	0.640176
Rpl10a_K130	Rpl10a	ILGPGLNK*AGK	RL10A_MOUSE 60S ribosomal protein L10a OS=Mus musculus OX=10090 GN=Rpl10a PE=1 SV=3	1.32938	0.00565623
Rpl6_K84	Rpl6	YSAAK*TK	RL6_MOUSE 60S ribosomal protein L6 OS=Mus musculus OX=10090 GN=Rpl6 PE=1 SV=3	1.32875	0.0841808
Hnrnpl_K490	Hnrnpl	FSTPEQAAK*NR	HNRPL_MOUSE Heterogeneous nuclear ribonucleoprotein L OS=Mus musculus OX=10090 GN=Hnrnpl PE=1 SV=2	1.32833	0.21962
Tkt_K319	Tkt	K*AYGLALAK	TKT_MOUSE Transketolase OS=Mus musculus OX=10090 GN=Tkt PE=1 SV=1	1.32833	0.0930235
Ktn1_K809	Ktn1	VIHEK*DGQIK	KTN1_MOUSE Kinectin OS=Mus musculus OX=10090 GN=Ktn1 PE=1 SV=1	1.328	0.294172
Arfgef2_K1651	Arfgef2	AGFK*GK	BIG2_MOUSE Brefeldin A-inhibited guanine nucleotide-exchange protein 2 OS=Mus musculus OX=10090 GN=Arfgef2 PE=1 SV=1	1.3275	0.416691
Cct8_K20	Cct8	DGAK*HFSGLEEAVYR	TCPQ_MOUSE T-complex protein 1 subunit theta OS=Mus musculus OX=10090 GN=Cct8 PE=1 SV=3	1.32714	0.25206
Shmt2_K103	Shmt2	YSEGYPGK*R	GLYM_MOUSE Serine hydroxymethyltransferase, mitochondrial OS=Mus musculus OX=10090 GN=Shmt2 PE=1 SV=1	1.32667	0.131242
Dld_K445	Dld	ILGHK*STDR	DLDH_MOUSE Dihydrolipoyl dehydrogenase, mitochondrial OS=Mus musculus OX=10090 GN=Dld PE=1 SV=2	1.32667	0.742806
Ttn_K472	Ttn	KEAEK*TAVTK	TITIN_MOUSE Titin OS=Mus musculus OX=10090 GN=Ttn PE=1 SV=1	1.32667	0.373107
Npm1_K237	Npm1	TPK*GPSSVEDIK	NPM_MOUSE Nucleophosmin OS=Mus musculus OX=10090 GN=Npm1 PE=1 SV=1	1.32625	0.099773
Fbl_K108	Fbl	GK*EDALVTK	FBRL_MOUSE rRNA 2'-O-methyltransferase fibrillarin OS=Mus musculus OX=10090 GN=Fbl PE=1 SV=2	1.32625	0.0899531
Ahsa1_K189	Ahsa1	AK*SAPSK	AHSA1_MOUSE Activator of 90 kDa heat shock protein ATPase homolog 1 OS=Mus musculus OX=10090 GN=Ahsa1 PE=1 SV=2	1.32571	0.126063
Pkm_K188	Pkm	IYVDDGLISLQVKEK* EK*GADFLVTEVENGGSLGSK	KPYM_MOUSE Pyruvate kinase PKM OS=Mus musculus OX=10090 GN=Pkm PE=1 SV=4	1.325
Lasp1_K75	Lasp1	LK*QQSELQSQVR	LASP1_MOUSE LIM and SH3 domain protein 1 OS=Mus musculus OX=10090 GN=Lasp1 PE=1 SV=1	1.325
Akr1b1_K64	Akr1b1	LK*EQVVK	ALDR_MOUSE Aldo-keto reductase family 1 member B1 OS=Mus musculus OX=10090 GN=Akr1b1 PE=1 SV=3	1.32357	0.131359
Anxa2_K204	Anxa2	ELYDAGVK*R	ANXA2_MOUSE Annexin A2 OS=Mus musculus OX=10090 GN=Anxa2 PE=1 SV=2	1.3225	0.404102
Hspa4_K680	Hspa4	LAELK*SLGQPIK	HSP74_MOUSE Heat shock 70 kDa protein 4 OS=Mus musculus OX=10090 GN=Hspa4 PE=1 SV=1	1.3225	0.210543
Hars1_K42	Hars1	LK*AQLGQDEGK	HARS1_MOUSE Histidine--tRNA ligase, cytoplasmic OS=Mus musculus OX=10090 GN=Hars1 PE=1 SV=2	1.3225	0.46954
Ubqln4_K18	Ubqln4	VTVK*TPK	UBQL4_MOUSE Ubiquilin-4 OS=Mus musculus OX=10090 GN=Ubqln4 PE=1 SV=1	1.32167	0.173058
Myh9_K1835	Myh9	QAASK*QVR	MYH9_MOUSE Myosin-9 OS=Mus musculus OX=10090 GN=Myh9 PE=1 SV=4	1.32143	0.0455497
S100a6_K22	S100a6	YSGK*EGDKHTLSK	S10A6_MOUSE Protein S100-A6 OS=Mus musculus OX=10090 GN=S100a6 PE=1 SV=3	1.32
Stmn1_K70	Stmn1	SHEAEVLK*QLAEK	STMN1_MOUSE Stathmin OS=Mus musculus OX=10090 GN=Stmn1 PE=1 SV=2	1.32
Pik3ap1_K669	Pik3ap1	SGK*HTDLEITVPIR	BCAP_MOUSE Phosphoinositide 3-kinase adapter protein 1 OS=Mus musculus OX=10090 GN=Pik3ap1 PE=1 SV=1	1.32
Nlrx1_K301	Nlrx1	IPSK*YVGR	NLRX1_MOUSE NLR family member X1 OS=Mus musculus OX=10090 GN=Nlrx1 PE=1 SV=1	1.32
Pom121_K361	Pom121	SLASQSSDDHLNK*R	PO121_MOUSE Nuclear envelope pore membrane protein POM 121 OS=Mus musculus OX=10090 GN=Pom121 PE=1 SV=2	1.32
Top1_K547	Top1	VPVEK*R	TOP1_MOUSE DNA topoisomerase 1 OS=Mus musculus OX=10090 GN=Top1 PE=1 SV=2	1.32
Hnrnpm_K238	Hnrnpm	ADILEDK*DGK	HNRPM_MOUSE Heterogeneous nuclear ribonucleoprotein M OS=Mus musculus OX=10090 GN=Hnrnpm PE=1 SV=3	1.32
Rrbp1_K1110	Rrbp1	ADAEK*AQEQQQR	RRBP1_MOUSE Ribosome-binding protein 1 OS=Mus musculus OX=10090 GN=Rrbp1 PE=1 SV=2	1.32
Ruvbl2_K197	Ruvbl2	VQAGDVITIDK*ATGK	RUVB2_MOUSE RuvB-like 2 OS=Mus musculus OX=10090 GN=Ruvbl2 PE=1 SV=3	1.32
Tomm20_K56	Tomm20	AGLSK*LPDLK	TOM20_MOUSE Mitochondrial import receptor subunit TOM20 homolog OS=Mus musculus OX=10090 GN=Tomm20 PE=1 SV=1	1.32
Ssrp1_K63	Ssrp1	VALGHGLK*LLTK	SSRP1_MOUSE FACT complex subunit SSRP1 OS=Mus musculus OX=10090 GN=Ssrp1 PE=1 SV=2	1.32	7.48635868087217E 20
Dnaja3_K299	Dnaja3	GAGQAK*QK	DNJA3_MOUSE DnaJ homolog subfamily A member 3, mitochondrial OS=Mus musculus OX=10090 GN=Dnaja3 PE=1 SV=1	1.32	0.0813806
Hnrnpm_K126	Hnrnpm	K*AAEVLNK	HNRPM_MOUSE Heterogeneous nuclear ribonucleoprotein M OS=Mus musculus OX=10090 GN=Hnrnpm PE=1 SV=3	1.32	0.194442
Cct5_K259	Cct5	IAILTCPFEPPK*PK	TCPE_MOUSE T-complex protein 1 subunit epsilon OS=Mus musculus OX=10090 GN=Cct5 PE=1 SV=1	1.32	0.422208
Capzb_K223	Capzb	LVEDMENK*IR	CAPZB_MOUSE F-actin-capping protein subunit beta OS=Mus musculus OX=10090 GN=Capzb PE=1 SV=3	1.32	0.6317
Prdx1_K35	Prdx1	DISLSEYK*GK	PRDX1_MOUSE Peroxiredoxin-1 OS=Mus musculus OX=10090 GN=Prdx1 PE=1 SV=1	1.32	0.155955
Msh2_K509	Msh2	GLGLDPGK*QIK	MSH2_MOUSE DNA mismatch repair protein Msh2 OS=Mus musculus OX=10090 GN=Msh2 PE=1 SV=1	1.32	0.310882
Fam81a_K242	Fam81a	IEK*ELLQK	FA81A_MOUSE Protein FAM81A OS=Mus musculus OX=10090 GN=Fam81a PE=1 SV=2	1.32	0.554434
Pmpca_K459	Pmpca	K*LPHELCTLIR	MPPA_MOUSE Mitochondrial-processing peptidase subunit alpha OS=Mus musculus OX=10090 GN=Pmpca PE=1 SV=1	1.32	0.765736
Capg_K28	Capg	VEK*LKPVPIAR	CAPG_MOUSE Macrophage-capping protein OS=Mus musculus OX=10090 GN=Capg PE=1 SV=2	1.31937	0.0346102
Impdh2_K436	Impdh2	YFSEADK*IK	IMDH2_MOUSE Inosine-5'-monophosphate dehydrogenase 2 OS=Mus musculus OX=10090 GN=Impdh2 PE=1 SV=2	1.318	0.219429
Hdlbp_K850	Hdlbp	VTLK*GAK	VIGLN_MOUSE Vigilin OS=Mus musculus OX=10090 GN=Hdlbp PE=1 SV=1	1.318	0.425943
Ndufa10_K191	Ndufa10	QCVDHYNEIK*R	NDUAA_MOUSE NADH dehydrogenase [ubiquinone] 1 alpha subcomplex subunit 10, mitochondrial OS=Mus musculus OX=10090 GN=Ndufa10 PE=1 SV=1	1.3175	0.451538
Wdr43_K366	Wdr43	VALNSK*DTHICLER	WDR43_MOUSE WD repeat-containing protein 43 OS=Mus musculus OX=10090 GN=Wdr43 PE=1 SV=2	1.31667	0.366371
H1-5_K189	H1-5	SPAK*PK	H15_MOUSE Histone H1.5 OS=Mus musculus OX=10090 GN=H1-5 PE=1 SV=2	1.316	0.113412
Plek_K45	Plek	SDNSPK*GMIPLK	PLEK_MOUSE Pleckstrin OS=Mus musculus OX=10090 GN=Plek PE=1 SV=1	1.316	0.169407
Eef1a1_K179	Eef1a1	EVSTYIK*K	EF1A1_MOUSE Elongation factor 1-alpha 1 OS=Mus musculus OX=10090 GN=Eef1a1 PE=1 SV=3	1.31571	0.0897289
Ckb_K11	Ckb	PFSNSHNTQK*LR	KCRB_MOUSE Creatine kinase B-type OS=Mus musculus OX=10090 GN=Ckb PE=1 SV=1	1.31563	0.000292044
H2bc3_K6	H2bc3	PEPSK*SAPAPK	H2B1B_MOUSE Histone H2B type 1-B OS=Mus musculus OX=10090 GN=H2bc3 PE=1 SV=3	1.315	0.0299245
Slc25a5_K268	Slc25a5	DEGSK*AFFK	ADT2_MOUSE ADP/ATP translocase 2 OS=Mus musculus OX=10090 GN=Slc25a5 PE=1 SV=3	1.31438	0.0387737
H4c1_K78	H4c1	DAVTYTEHAK*R	H4_MOUSE Histone H4 OS=Mus musculus OX=10090 GN=H4c1 PE=1 SV=2	1.31437	0.0528493
Rpl14_K211	Rpl14	APAPK*AAGK	RL14_MOUSE 60S ribosomal protein L14 OS=Mus musculus OX=10090 GN=Rpl14 PE=1 SV=3	1.31214	0.0771481
Tkt_K543	Tkt	K*LILDSAR	TKT_MOUSE Transketolase OS=Mus musculus OX=10090 GN=Tkt PE=1 SV=1	1.31125	0.084485
Plec_K608	Plec	LLFNDVQTLK*DGR	PLEC_MOUSE Plectin OS=Mus musculus OX=10090 GN=Plec PE=1 SV=3	1.31
Tpm4_K212	Tpm4	TVSK*LEK	TPM4_MOUSE Tropomyosin alpha-4 chain OS=Mus musculus OX=10090 GN=Tpm4 PE=1 SV=3	1.31
Tuba1a_K336	Tuba1a	DVNAAIATIK*TK	TBA1A_MOUSE Tubulin alpha-1A chain OS=Mus musculus OX=10090 GN=Tuba1a PE=1 SV=1	1.31
Ampd2_K196	Ampd2	YLQQLAEK*PLETR	AMPD2_MOUSE AMP deaminase 2 OS=Mus musculus OX=10090 GN=Ampd2 PE=1 SV=1	1.31
Inpp5d_K340	Inpp5d	DGSEDK*FYSHK	SHIP1_MOUSE Phosphatidylinositol 3,4,5-trisphosphate 5-phosphatase 1 OS=Mus musculus OX=10090 GN=Inpp5d PE=1 SV=2	1.31
Csde1_K166	Csde1	INFVIDNNK*HTGAVSAR	CSDE1_MOUSE Cold shock domain-containing protein E1 OS=Mus musculus OX=10090 GN=Csde1 PE=1 SV=1	1.31
gag_K416	gag	LEDLK*NK	GAG_MLVMS Gag polyprotein OS=Moloney murine leukemia virus (isolate Shinnick) OX=928306 GN=gag PE=1 SV=4	1.31
Pabpc1_K157	Pabpc1	AIEK*MNGMLLNDR	PABP1_MOUSE Polyadenylate-binding protein 1 OS=Mus musculus OX=10090 GN=Pabpc1 PE=1 SV=2	1.31
Hnrnpab_K237	Hnrnpab	VAQPK*EVYQQQQYGSGGR	ROAA_MOUSE Heterogeneous nuclear ribonucleoprotein A/B OS=Mus musculus OX=10090 GN=Hnrnpab PE=1 SV=1	1.31	0.31933
Lmna_K123	Lmna	K*EGDLLAAQAR	LMNA_MOUSE Prelamin-A/C OS=Mus musculus OX=10090 GN=Lmna PE=1 SV=2	1.31	0.119303
Hsp90ab1_K557	Hsp90ab1	MEESK*AK	HS90B_MOUSE Heat shock protein HSP 90-beta OS=Mus musculus OX=10090 GN=Hsp90ab1 PE=1 SV=3	1.31	0.137024
Septin9_K488	Septin9	LVNEK*FR	SEPT9_MOUSE Septin-9 OS=Mus musculus OX=10090 GN=Septin9 PE=1 SV=1	1.31	0.23287
Mybbp1a_K624	Mybbp1a	K*SMEQNPR	MBB1A_MOUSE Myb-binding protein 1A OS=Mus musculus OX=10090 GN=Mybbp1a PE=1 SV=2	1.31	0.329628
Pcbp2_K306	Pcbp2	QGAK*INEIR	PCBP2_MOUSE Poly(rC)-binding protein 2 OS=Mus musculus OX=10090 GN=Pcbp2 PE=1 SV=1	1.30875	0.0620195
Shmt2_K474	Shmt2	SFLLK*DPETSQR	GLYM_MOUSE Serine hydroxymethyltransferase, mitochondrial OS=Mus musculus OX=10090 GN=Shmt2 PE=1 SV=1	1.30833	0.0880884
Ncl_K296	Ncl	EAPEAK*K	NUCL_MOUSE Nucleolin OS=Mus musculus OX=10090 GN=Ncl PE=1 SV=2	1.30833	0.322208
Gars1_K98	Gars1	VLEAK*ELALQPK	GARS_MOUSE Glycine--tRNA ligase OS=Mus musculus OX=10090 GN=Gars1 PE=1 SV=1	1.30786	0.121075
Nolc1_K459	Nolc1	VTAK*AAPAK	NOLC1_MOUSE Nucleolar and coiled-body phosphoprotein 1 OS=Mus musculus OX=10090 GN=Nolc1 PE=1 SV=1	1.3075	0.157172
Ube2n_K10	Ube2n	IIK*ETQR	UBE2N_MOUSE Ubiquitin-conjugating enzyme E2 N OS=Mus musculus OX=10090 GN=Ube2n PE=1 SV=1	1.30571	0.109565
Ube2c_K18	Ube2c	K*GAEPCGGAAR	UBE2C_MOUSE Ubiquitin-conjugating enzyme E2 C OS=Mus musculus OX=10090 GN=Ube2c PE=1 SV=1	1.305
Cct6a_K10	Cct6a	TLNPK*AEVAR	TCPZ_MOUSE T-complex protein 1 subunit zeta OS=Mus musculus OX=10090 GN=Cct6a PE=1 SV=3	1.305	0.0571066
Hnrnpl_K34	Hnrnpl	VK*MAAAGGGGGGGR	HNRPL_MOUSE Heterogeneous nuclear ribonucleoprotein L OS=Mus musculus OX=10090 GN=Hnrnpl PE=1 SV=2	1.304	0.0345261
Sdcbp_K110	Sdcbp	AEIK*QGIR	SDCB1_MOUSE Syntenin-1 OS=Mus musculus OX=10090 GN=Sdcbp PE=1 SV=1	1.30375	0.0712798
Rpl29_K130	Rpl29	AGAK*APAK	RL29_MOUSE 60S ribosomal protein L29 OS=Mus musculus OX=10090 GN=Rpl29 PE=1 SV=2	1.30333	0.157642
Hist2h2bb_K6	Hist2h2bb	PDPAK*SAPAPK	H2B2B_MOUSE Histone H2B type 2-B OS=Mus musculus OX=10090 GN=Hist2h2bb PE=1 SV=3	1.3025	0.00789832
Cct7_K55	Cct7	GK*ATISNDGATILK	TCPH_MOUSE T-complex protein 1 subunit eta OS=Mus musculus OX=10090 GN=Cct7 PE=1 SV=1	1.3025	0.357835
Eno1_K193	Eno1	IGAEVYHNLK*NVIK	ENOA_MOUSE Alpha-enolase OS=Mus musculus OX=10090 GN=Eno1 PE=1 SV=3	1.30083	0.276794
Pabpc1_K108	Pabpc1	NLDK*SIDNK	PABP1_MOUSE Polyadenylate-binding protein 1 OS=Mus musculus OX=10090 GN=Pabpc1 PE=1 SV=2	1.30083	0.165216
Phb2_K216	Phb2	AQFLVEK*AK	PHB2_MOUSE Prohibitin-2 OS=Mus musculus OX=10090 GN=Phb2 PE=1 SV=1	1.30071	0.0533732
Hnrnpa3_K118	Hnrnpa3	EDSVK*PGAHLTVK	ROA3_MOUSE Heterogeneous nuclear ribonucleoprotein A3 OS=Mus musculus OX=10090 GN=Hnrnpa3 PE=1 SV=1	1.30063	0.169217
Cltc_K367	Cltc	K*FNALFAQGNYSEAAK	CLH1_MOUSE Clathrin heavy chain 1 OS=Mus musculus OX=10090 GN=Cltc PE=1 SV=3	1.3	0.206899
Baz1a_K890	Baz1a	PVHK*PNR	BAZ1A_MOUSE Bromodomain adjacent to zinc finger domain protein 1A OS=Mus musculus OX=10090 GN=Baz1a PE=1 SV=3	1.3
Gart_K453	Gart	K*IQPLAK	PUR2_MOUSE Trifunctional purine biosynthetic protein adenosine-3 OS=Mus musculus OX=10090 GN=Gart PE=1 SV=3	1.3
Hspa4_K257	Hspa4	YKLDIK*SK	HSP74_MOUSE Heat shock 70 kDa protein 4 OS=Mus musculus OX=10090 GN=Hspa4 PE=1 SV=1	1.3
Hmgn2_K51	Hmgn2	GEK*VPK	HMGN2_MOUSE Non-histone chromosomal protein HMG-17 OS=Mus musculus OX=10090 GN=Hmgn2 PE=1 SV=2	1.3
Gmip_K933	Gmip	NPLPK*HFEITQETAR	GMIP_MOUSE GEM-interacting protein OS=Mus musculus OX=10090 GN=Gmip PE=1 SV=1	1.3
Anxa5_K106	Anxa5	GAGTDEK*VLTEIIASR	ANXA5_MOUSE Annexin A5 OS=Mus musculus OX=10090 GN=Anxa5 PE=1 SV=1	1.3	0.0423443
Nudt9_K228	Nudt9	ISATLK*R	NUDT9_MOUSE ADP-ribose pyrophosphatase, mitochondrial OS=Mus musculus OX=10090 GN=Nudt9 PE=1 SV=1	1.3	0.1038
Cdc42_K133	Cdc42	NK*QKPITPETAEK	CDC42_MOUSE Cell division control protein 42 homolog OS=Mus musculus OX=10090 GN=Cdc42 PE=1 SV=2	1.3	0.123299
Eif4g2_K313	Eif4g2	K*AFLDNGPK	IF4G2_MOUSE Eukaryotic translation initiation factor 4 gamma 2 OS=Mus musculus OX=10090 GN=Eif4g2 PE=1 SV=2	1.3	0.185359
Psmd1_K720	Psmd1	VINDK*HDDVMAK	PSMD1_MOUSE 26S proteasome non-ATPase regulatory subunit 1 OS=Mus musculus OX=10090 GN=Psmd1 PE=1 SV=1	1.3	0.612194
Npm1_K141	Npm1	LLGMSGK*R	NPM_MOUSE Nucleophosmin OS=Mus musculus OX=10090 GN=Npm1 PE=1 SV=1	1.3	0.00913518
S100a10_K28	S100a10	FAGDKDHLTK*EDLR	S10AA_MOUSE Protein S100-A10 OS=Mus musculus OX=10090 GN=S100a10 PE=1 SV=2	1.29857	0.0958715
Pgk1_K191	Pgk1	AGGFLMK*K	PGK1_MOUSE Phosphoglycerate kinase 1 OS=Mus musculus OX=10090 GN=Pgk1 PE=1 SV=4	1.29714	0.0995127
Sfpq_K464	Sfpq	NPMYQK*ER	SFPQ_MOUSE Splicing factor, proline- and glutamine-rich OS=Mus musculus OX=10090 GN=Sfpq PE=1 SV=1	1.29667	0.144665
Pgk1_K41	Pgk1	IK*AAVPSIK	PGK1_MOUSE Phosphoglycerate kinase 1 OS=Mus musculus OX=10090 GN=Pgk1 PE=1 SV=4	1.29667	0.181486
Ddx17_K513	Ddx17	GVK*DGGR	DDX17_MOUSE Probable ATP-dependent RNA helicase DDX17 OS=Mus musculus OX=10090 GN=Ddx17 PE=1 SV=1	1.29667	0.290022
Srsf2_K36	Srsf2	VFEK*YGR	SRSF2_MOUSE Serine/arginine-rich splicing factor 2 OS=Mus musculus OX=10090 GN=Srsf2 PE=1 SV=4	1.29571	0.183053
Hsph1_K665	Hsph1	FICEQEHEK*FLR	HS105_MOUSE Heat shock protein 105 kDa OS=Mus musculus OX=10090 GN=Hsph1 PE=1 SV=2	1.295	0.432603
Nolc1_K311	Nolc1	K*SPGTQAPK	NOLC1_MOUSE Nucleolar and coiled-body phosphoprotein 1 OS=Mus musculus OX=10090 GN=Nolc1 PE=1 SV=1	1.295	0.0322906
Nolc1_K496	Nolc1	K*AAGGAVSTPAPGK	NOLC1_MOUSE Nucleolar and coiled-body phosphoprotein 1 OS=Mus musculus OX=10090 GN=Nolc1 PE=1 SV=1	1.295	0.21769
Prdx1_K197	Prdx1	EYFSK*QK	PRDX1_MOUSE Peroxiredoxin-1 OS=Mus musculus OX=10090 GN=Prdx1 PE=1 SV=1	1.295	0.273222
Myh9_K1445	Myh9	K*FDQLLAEEK	MYH9_MOUSE Myosin-9 OS=Mus musculus OX=10090 GN=Myh9 PE=1 SV=4	1.295	0.340858
Dtx3l_K416	Dtx3l	VQEK*GQK	DTX3L_MOUSE E3 ubiquitin-protein ligase DTX3L OS=Mus musculus OX=10090 GN=Dtx3l PE=1 SV=1	1.295	0.53078
Hmox2_K258	Hmox2	ETLEDGLPVHDGK*GDIR	HMOX2_MOUSE Heme oxygenase 2 OS=Mus musculus OX=10090 GN=Hmox2 PE=1 SV=1	1.294	0.498804
Dock7_K1952	Dock7	AHGELHEQFK*R	DOCK7_MOUSE Dedicator of cytokinesis protein 7 OS=Mus musculus OX=10090 GN=Dock7 PE=1 SV=3	1.29375	0.178172
S100a4_K35	S100a4	TELK*ELLTR	S10A4_MOUSE Protein S100-A4 OS=Mus musculus OX=10090 GN=S100a4 PE=1 SV=1	1.29375	0.0552443
Rpl19_K153	Rpl19	K*LLADQAEAR	RL19_MOUSE 60S ribosomal protein L19 OS=Mus musculus OX=10090 GN=Rpl19 PE=1 SV=1	1.29333	0.277279
Atp5f1a_K175	Atp5f1a	VGLK*APGIIPR	ATPA_MOUSE ATP synthase subunit alpha, mitochondrial OS=Mus musculus OX=10090 GN=Atp5f1a PE=1 SV=1	1.2925	0.205378
Bri3bp_K225	Bri3bp	GSPGGLCSPSVEEK*LEHLENQVR	BRI3B_MOUSE BRI3-binding protein OS=Mus musculus OX=10090 GN=Bri3bp PE=1 SV=1	1.292	0.383428
Npm1_K32	Npm1	ADKDYHFK*VDNDENEHQLSLR DYHFK*VDNDENEHQLSLR	NPM_MOUSE Nucleophosmin OS=Mus musculus OX=10090 GN=Npm1 PE=1 SV=1	1.29188	0.0525408
Scfd1_K21	Scfd1	TVALK*R	SCFD1_MOUSE Sec1 family domain-containing protein 1 OS=Mus musculus OX=10090 GN=Scfd1 PE=1 SV=1	1.29
Tpr_K386	Tpr	AVDELHK*LLK	TPR_MOUSE Nucleoprotein TPR OS=Mus musculus OX=10090 GN=Tpr PE=1 SV=1	1.29
Kif5b_K791	Kif5b	GLEETVAK*ELQTLHNLR	KINH_MOUSE Kinesin-1 heavy chain OS=Mus musculus OX=10090 GN=Kif5b PE=1 SV=3	1.29
Samhd1_K651	Samhd1	TSSCLQEVSK*VK	SAMH1_MOUSE Deoxynucleoside triphosphate triphosphohydrolase SAMHD1 OS=Mus musculus OX=10090 GN=Samhd1 PE=1 SV=3	1.29
Zw10_K484	Zw10	ISEAVK*K	ZW10_MOUSE Centromere/kinetochore protein zw10 homolog OS=Mus musculus OX=10090 GN=Zw10 PE=1 SV=3	1.29
Ncapd2_K35	Ncapd2	EVLPVK*HLSSQLR	CND1_MOUSE Condensin complex subunit 1 OS=Mus musculus OX=10090 GN=Ncapd2 PE=1 SV=2	1.29
H1-3_K26	H1-3	K*TGAAAGK	H13_MOUSE Histone H1.3 OS=Mus musculus OX=10090 GN=H1-3 PE=1 SV=2	1.29	0.118915
Hspa8_K187	Hspa8	IINEPTAAAIAYGLDK*K	HSP7C_MOUSE Heat shock cognate 71 kDa protein OS=Mus musculus OX=10090 GN=Hspa8 PE=1 SV=1	1.29	0.353192
Top2a_K341	Top2a	LVDVVK*K	TOP2A_MOUSE DNA topoisomerase 2-alpha OS=Mus musculus OX=10090 GN=Top2a PE=1 SV=2	1.29	0.608084
Cct6a_K287	Cct6a	VCGDSDK*GFVVINQK	TCPZ_MOUSE T-complex protein 1 subunit zeta OS=Mus musculus OX=10090 GN=Cct6a PE=1 SV=3	1.29	0.641903
Pgd_K316	Pgd	VVQLEGSK*K	6PGD_MOUSE 6-phosphogluconate dehydrogenase, decarboxylating OS=Mus musculus OX=10090 GN=Pgd PE=1 SV=3	1.29	0.252882
Cs_K52	Cs	TFK*QQHGK	CISY_MOUSE Citrate synthase, mitochondrial OS=Mus musculus OX=10090 GN=Cs PE=1 SV=1	1.28875	0.161913
Lcp2_K38	Lcp2	K*YHIDGAR	LCP2_MOUSE Lymphocyte cytosolic protein 2 OS=Mus musculus OX=10090 GN=Lcp2 PE=1 SV=2	1.28875	0.377736
Hspa8_K56	Hspa8	LIGDAAK*NQVAMNPTNTVFDAK	HSP7C_MOUSE Heat shock cognate 71 kDa protein OS=Mus musculus OX=10090 GN=Hspa8 PE=1 SV=1	1.28812	0.0444558
Eef1g_K277	Eef1g	AK*DPFAHLPK	EF1G_MOUSE Elongation factor 1-gamma OS=Mus musculus OX=10090 GN=Eef1g PE=1 SV=3	1.2875	0.247021
Zmpste24_K470	Zmpste24	LQALK*NAK	FACE1_MOUSE CAAX prenyl protease 1 homolog OS=Mus musculus OX=10090 GN=Zmpste24 PE=1 SV=2	1.28687	0.0298428
Ktn1_K1143	Ktn1	IK*ADESQR	KTN1_MOUSE Kinectin OS=Mus musculus OX=10090 GN=Ktn1 PE=1 SV=1	1.28667	0.296828
Srsf5_K175	Srsf5	IK*LIEGSK	SRSF5_MOUSE Serine/arginine-rich splicing factor 5 OS=Mus musculus OX=10090 GN=Srsf5 PE=1 SV=2	1.285	0.0777767
Nop58_K45	Nop58	LK*HFEK	NOP58_MOUSE Nucleolar protein 58 OS=Mus musculus OX=10090 GN=Nop58 PE=1 SV=1	1.285	0.178036
Gnl3_K232	Gnl3	ICCGK*EALWK	GNL3_MOUSE Guanine nucleotide-binding protein-like 3 OS=Mus musculus OX=10090 GN=Gnl3 PE=1 SV=2	1.285	0.411449
Cltb_K204	Cltb	VAQLCDFNPK*SSK	CLCB_MOUSE Clathrin light chain B OS=Mus musculus OX=10090 GN=Cltb PE=1 SV=1	1.285	0.521572
Eprs1_K794	Eprs1	EK*TGQEYKPGNPSAAAVQTVSTK	SYEP_MOUSE Bifunctional glutamate/proline--tRNA ligase OS=Mus musculus OX=10090 GN=Eprs1 PE=1 SV=4	1.284	0.281714
Nop2_K722	Nop2	PK*DCAPSLGK	NOP2_MOUSE Probable 28S rRNA (cytosine-C(5))-methyltransferase OS=Mus musculus OX=10090 GN=Nop2 PE=1 SV=1	1.28333	0.195927
Iqgap1_K1168	Iqgap1	VLK*DSLHEK	IQGA1_MOUSE Ras GTPase-activating-like protein IQGAP1 OS=Mus musculus OX=10090 GN=Iqgap1 PE=1 SV=2	1.28333	0.353215
Hm13_K61	Hm13	GK*SSSDMPETITSR	HM13_MOUSE Minor histocompatibility antigen H13 OS=Mus musculus OX=10090 GN=Hm13 PE=1 SV=1	1.28286	0.162823
Cap1_K62	Cap1	MSK*EIGGDVQK	CAP1_MOUSE Adenylyl cyclase-associated protein 1 OS=Mus musculus OX=10090 GN=Cap1 PE=1 SV=4	1.2825	0.0896182
Srsf5_K163	Srsf5	NAIEK*LSGK	SRSF5_MOUSE Serine/arginine-rich splicing factor 5 OS=Mus musculus OX=10090 GN=Srsf5 PE=1 SV=2	1.282	0.142285
Myh9_K1249	Myh9	K*VEAQLQELQVK	MYH9_MOUSE Myosin-9 OS=Mus musculus OX=10090 GN=Myh9 PE=1 SV=4	1.28188	0.114755
Atp5if1_K49	Atp5if1	AGGAFGK*R	ATIF1_MOUSE ATPase inhibitor, mitochondrial OS=Mus musculus OX=10090 GN=Atp5if1 PE=1 SV=2	1.28167	0.25436
Ncl_K88	Ncl	K*AVATPAK	NUCL_MOUSE Nucleolin OS=Mus musculus OX=10090 GN=Ncl PE=1 SV=2	1.28125	0.0363961
Rpl14_K206	Rpl14	TPAQK*APAPK	RL14_MOUSE 60S ribosomal protein L14 OS=Mus musculus OX=10090 GN=Rpl14 PE=1 SV=3	1.28125	0.0601294
Rpl23_K69	Rpl23	GK*PELR	RL23_MOUSE 60S ribosomal protein L23 OS=Mus musculus OX=10090 GN=Rpl23 PE=1 SV=1	1.28
Gas7_K283	Gas7	YASVEK*AR	GAS7_MOUSE Growth arrest-specific protein 7 OS=Mus musculus OX=10090 GN=Gas7 PE=1 SV=1	1.28
Serbp1_K37	Serbp1	AAENK*K	PAIRB_MOUSE Plasminogen activator inhibitor 1 RNA-binding protein OS=Mus musculus OX=10090 GN=Serbp1 PE=1 SV=2	1.28
Sugp1_K190	Sugp1	VIEK*LAR	SUGP1_MOUSE SURP and G-patch domain-containing protein 1 OS=Mus musculus OX=10090 GN=Sugp1 PE=1 SV=1	1.28
Acod1_K470	Acod1	GPSVQDEASK*LSSMSSFDHTTLPR	IRG1_MOUSE Cis-aconitate decarboxylase OS=Mus musculus OX=10090 GN=Acod1 PE=1 SV=2	1.28
Rpl29_K126	Rpl29	VQTK*AGAK	RL29_MOUSE 60S ribosomal protein L29 OS=Mus musculus OX=10090 GN=Rpl29 PE=1 SV=2	1.28
Phb_K208	Phb	K*AAIISAEGDSK	PHB_MOUSE Prohibitin OS=Mus musculus OX=10090 GN=Phb PE=1 SV=1	1.28
Lig1_K554	Lig1	GVSEVLK*R	DNLI1_MOUSE DNA ligase 1 OS=Mus musculus OX=10090 GN=Lig1 PE=1 SV=2	1.28
Gspt2_K271	Gspt2	GK*TVEVGR	ERF3B_MOUSE Eukaryotic peptide chain release factor GTP-binding subunit ERF3B OS=Mus musculus OX=10090 GN=Gspt2 PE=1 SV=1	1.28
Hspa5_K82	Hspa5	LIGDAAK*NQLTSNPENTVFDAK	BIP_MOUSE Endoplasmic reticulum chaperone BiP OS=Mus musculus OX=10090 GN=Hspa5 PE=1 SV=3	1.28	0.0185697
Ruvbl2_K427	Ruvbl2	GTEVQVDDIK*R	RUVB2_MOUSE RuvB-like 2 OS=Mus musculus OX=10090 GN=Ruvbl2 PE=1 SV=3	1.28	0.0991136
Hnrnpm_K276	Hnrnpm	PMHVK*MDER	HNRPM_MOUSE Heterogeneous nuclear ribonucleoprotein M OS=Mus musculus OX=10090 GN=Hnrnpm PE=1 SV=3	1.28	0.251499
Nit2_K68	Nit2	IPGESTQK*LSEVAK	NIT2_MOUSE Omega-amidase NIT2 OS=Mus musculus OX=10090 GN=Nit2 PE=1 SV=1	1.28	0.347374
Hspd1_K473	Hspd1	ALK*IPAMTIAK	CH60_MOUSE 60 kDa heat shock protein, mitochondrial OS=Mus musculus OX=10090 GN=Hspd1 PE=1 SV=1	1.28	0.0224015
Pkm_K66	Pkm	EMIK*SGMNVAR	KPYM_MOUSE Pyruvate kinase PKM OS=Mus musculus OX=10090 GN=Pkm PE=1 SV=4	1.28	0.304921
Ruvbl2_K157	Ruvbl2	PATGTGSK*VGK	RUVB2_MOUSE RuvB-like 2 OS=Mus musculus OX=10090 GN=Ruvbl2 PE=1 SV=3	1.2775	0.253748
Pxn_K574	Pxn	GTFK*EQNDKPYCQSCFVK	PAXI_MOUSE Paxillin OS=Mus musculus OX=10090 GN=Pxn PE=1 SV=1	1.2775	0.393776
Rps9_K155	Rps9	LDSQK*HIDFSLR	RS9_MOUSE 40S ribosomal protein S9 OS=Mus musculus OX=10090 GN=Rps9 PE=1 SV=3	1.2775	0.407126
Rps6_K188	Rps6	VLQHK*R	RS6_MOUSE 40S ribosomal protein S6 OS=Mus musculus OX=10090 GN=Rps6 PE=1 SV=1	1.2775	0.516749
Hdgf_K105	Hdgf	ASGYQSSQK*K	HDGF_MOUSE Hepatoma-derived growth factor OS=Mus musculus OX=10090 GN=Hdgf PE=1 SV=2	1.27714	0.108167
Atp5f1b_K198	Atp5f1b	VVDLLAPYAK*GGK	ATPB_MOUSE ATP synthase subunit beta, mitochondrial OS=Mus musculus OX=10090 GN=Atp5f1b PE=1 SV=2	1.27667	0.256763
Cyth4_K27	Cyth4	K*QLLEDIQK	CYH4_MOUSE Cytohesin-4 OS=Mus musculus OX=10090 GN=Cyth4 PE=1 SV=1	1.27667	0.415826
Slc25a5_K105	Slc25a5	QIFLGGVDK*R	ADT2_MOUSE ADP/ATP translocase 2 OS=Mus musculus OX=10090 GN=Slc25a5 PE=1 SV=3	1.27643	0.171675
Nolc1_K123	Nolc1	ASVPQHAGK*AAAK	NOLC1_MOUSE Nucleolar and coiled-body phosphoprotein 1 OS=Mus musculus OX=10090 GN=Nolc1 PE=1 SV=1	1.27625	0.0122625
Npm1_K246	Npm1	GPSSVEDIK*AK	NPM_MOUSE Nucleophosmin OS=Mus musculus OX=10090 GN=Npm1 PE=1 SV=1	1.27563	0.105261
G6pdx_K171	G6pdx	IIVEK*PFGR	G6PD1_MOUSE Glucose-6-phosphate 1-dehydrogenase X OS=Mus musculus OX=10090 GN=G6pdx PE=1 SV=3	1.275	0.034636
Dync1h1_K3299	Dync1h1	K*QHLVEVR	DYHC1_MOUSE Cytoplasmic dynein 1 heavy chain 1 OS=Mus musculus OX=10090 GN=Dync1h1 PE=1 SV=2	1.275	0.627439
Fcer1g_K80	Fcer1g	SQETYETLK*HEKPPQ	FCERG_MOUSE High affinity immunoglobulin epsilon receptor subunit gamma OS=Mus musculus OX=10090 GN=Fcer1g PE=1 SV=1	1.27417	0.0724151
Atp5f1b_K485	Atp5f1b	LVPLK*ETIK	ATPB_MOUSE ATP synthase subunit beta, mitochondrial OS=Mus musculus OX=10090 GN=Atp5f1b PE=1 SV=2	1.27417	0.240079
Eno1_K420	Eno1	IEEELGSK*AK	ENOA_MOUSE Alpha-enolase OS=Mus musculus OX=10090 GN=Eno1 PE=1 SV=3	1.27357	0.235068
Slc38a1_K60	Slc38a1	SLTNSHLEK*R	S38A1_MOUSE Sodium-coupled neutral amino acid transporter 1 OS=Mus musculus OX=10090 GN=Slc38a1 PE=1 SV=1	1.27125	0.195192
Vegfa_K148	Vegfa	GKGK*GQK	VEGFA_MOUSE Vascular endothelial growth factor A OS=Mus musculus OX=10090 GN=Vegfa PE=1 SV=2	1.27	0.379215
Fkbp15_K49	Fkbp15	K*GQGTAAGNQTAPK	FKB15_MOUSE FK506-binding protein 15 OS=Mus musculus OX=10090 GN=Fkbp15 PE=1 SV=2	1.27
Srrm1_K678	Srrm1	SPSLSSK*HR	SRRM1_MOUSE Serine/arginine repetitive matrix protein 1 OS=Mus musculus OX=10090 GN=Srrm1 PE=1 SV=2	1.27
Rpl4_K120	Rpl4	VNTTQK*R	RL4_MOUSE 60S ribosomal protein L4 OS=Mus musculus OX=10090 GN=Rpl4 PE=1 SV=3	1.27
Ctps1_K490	Ctps1	K*CLEEQGLK	PYRG1_MOUSE CTP synthase 1 OS=Mus musculus OX=10090 GN=Ctps1 PE=1 SV=2	1.27
Bin2_K31	Bin2	VLQK*LGK	BIN2_MOUSE Bridging integrator 2 OS=Mus musculus OX=10090 GN=Bin2 PE=1 SV=1	1.27
Hspa4l_K257	Hspa4l	INVK*ENSR	HS74L_MOUSE Heat shock 70 kDa protein 4L OS=Mus musculus OX=10090 GN=Hspa4l PE=1 SV=2	1.27
Tppp_K14	Tppp	AANK*TPPK	TPPP_MOUSE Tubulin polymerization-promoting protein OS=Mus musculus OX=10090 GN=Tppp PE=1 SV=1	1.27
Phgdh_K289	Phgdh	ALVDHENVISCPHLGASTK*EAQSR	SERA_MOUSE D-3-phosphoglycerate dehydrogenase OS=Mus musculus OX=10090 GN=Phgdh PE=1 SV=3	1.27
Srsf7_K99	Srsf7	GLDGK*VICGSR	SRSF7_MOUSE Serine/arginine-rich splicing factor 7 OS=Mus musculus OX=10090 GN=Srsf7 PE=1 SV=1	1.27
Cct6a_K55	Cct6a	MLVSGAGDIK*LTK	TCPZ_MOUSE T-complex protein 1 subunit zeta OS=Mus musculus OX=10090 GN=Cct6a PE=1 SV=3	1.27
Myh9_K202	Myh9	K*DQGELER	MYH9_MOUSE Myosin-9 OS=Mus musculus OX=10090 GN=Myh9 PE=1 SV=4	1.27
Blk_K78	Blk	K*LQVLR	BLK_MOUSE Tyrosine-protein kinase Blk OS=Mus musculus OX=10090 GN=Blk PE=1 SV=4	1.27
H3c1_K123	H3c1	VTIMPK*DIQLAR	H31_MOUSE Histone H3.1 OS=Mus musculus OX=10090 GN=H3c1 PE=1 SV=2	1.27	0.385994
Hcls1_K224	Hcls1	K*TTPIEAASSGAR	HCLS1_MOUSE Hematopoietic lineage cell-specific protein OS=Mus musculus OX=10090 GN=Hcls1 PE=1 SV=2	1.26875	0.158371
Gspt1_K275	Gspt1	GK*TVEVGR	ERF3A_MOUSE Eukaryotic peptide chain release factor GTP-binding subunit ERF3A OS=Mus musculus OX=10090 GN=Gspt1 PE=1 SV=2	1.26875	0.0952871
Vim_K223	Vim	K*VESLQEEIAFLK	VIME_MOUSE Vimentin OS=Mus musculus OX=10090 GN=Vim PE=1 SV=3	1.26857	0.297985
Prdx1_K168	Prdx1	LVQAFQFTDK*HGEVCPAGWKPGSDTIKPDVNK	PRDX1_MOUSE Peroxiredoxin-1 OS=Mus musculus OX=10090 GN=Prdx1 PE=1 SV=1	1.26833	0.380286
Ncl_K429	Ncl	LVSQDGK*SK	NUCL_MOUSE Nucleolin OS=Mus musculus OX=10090 GN=Ncl PE=1 SV=2	1.26812	0.261232
Sfpq_K413	Sfpq	GIVEFASK*PAAR	SFPQ_MOUSE Splicing factor, proline- and glutamine-rich OS=Mus musculus OX=10090 GN=Sfpq PE=1 SV=1	1.265	0.115842
Hmgb1_K165	Hmgb1	AK*GKPDAAK	HMGB1_MOUSE High mobility group protein B1 OS=Mus musculus OX=10090 GN=Hmgb1 PE=1 SV=2	1.265	0.184085
Ptpn6_K257	Ptpn6	QEVK*NLHQR	PTN6_MOUSE Tyrosine-protein phosphatase non-receptor type 6 OS=Mus musculus OX=10090 GN=Ptpn6 PE=1 SV=2	1.265	0.226862
Cct6a_K199	Cct6a	HK*SETDTSLIR	TCPZ_MOUSE T-complex protein 1 subunit zeta OS=Mus musculus OX=10090 GN=Cct6a PE=1 SV=3	1.26438	0.142929
Mdh2_K157	Mdh2	K*HGVYNPNK	MDHM_MOUSE Malate dehydrogenase, mitochondrial OS=Mus musculus OX=10090 GN=Mdh2 PE=1 SV=3	1.264	0.00271736
Hspa5_K447	Hspa5	NTVVPTK*K	BIP_MOUSE Endoplasmic reticulum chaperone BiP OS=Mus musculus OX=10090 GN=Hspa5 PE=1 SV=3	1.26333	0.320454
Ufc1_K162	Ufc1	GVIQHK*EK	UFC1_MOUSE Ubiquitin-fold modifier-conjugating enzyme 1 OS=Mus musculus OX=10090 GN=Ufc1 PE=1 SV=1	1.26333	0.344054
Atp5f1b_K55	Atp5f1b	AAQASAAPK*AGTATGR	ATPB_MOUSE ATP synthase subunit beta, mitochondrial OS=Mus musculus OX=10090 GN=Atp5f1b PE=1 SV=2	1.26312	0.0100858
Rpa1_K597	Rpa1	IK*ATVMDVKPVDFR	RFA1_MOUSE Replication protein A 70 kDa DNA-binding subunit OS=Mus musculus OX=10090 GN=Rpa1 PE=1 SV=1	1.263	0.191676
Hcls1_K41	Hcls1	WGAK*TIEGSGR	HCLS1_MOUSE Hematopoietic lineage cell-specific protein OS=Mus musculus OX=10090 GN=Hcls1 PE=1 SV=2	1.263	0.181055
Csde1_K81	Csde1	TGK*PIAIK	CSDE1_MOUSE Cold shock domain-containing protein E1 OS=Mus musculus OX=10090 GN=Csde1 PE=1 SV=1	1.2625	0.0717192
Park7_K130	Park7	VTTHPLAK*DK	PARK7_MOUSE Parkinson disease protein 7 homolog OS=Mus musculus OX=10090 GN=Park7 PE=1 SV=1	1.2625	0.277335
Hnrnpm_K144	Hnrnpm	VK*EDPDGEHAR	HNRPM_MOUSE Heterogeneous nuclear ribonucleoprotein M OS=Mus musculus OX=10090 GN=Hnrnpm PE=1 SV=3	1.2625	0.282438
Tln1_K922	Tln1	LEHAAK*QAAASATQTIAAAQHAASAPK	TLN1_MOUSE Talin-1 OS=Mus musculus OX=10090 GN=Tln1 PE=1 SV=2	1.26167	0.279678
Bag2_K9	Bag2	ISAK*AHEGR	BAG2_MOUSE BAG family molecular chaperone regulator 2 OS=Mus musculus OX=10090 GN=Bag2 PE=1 SV=1	1.26125	0.147116
Set_K23	Set	PAAAPK*LEDK	SET_MOUSE Protein SET OS=Mus musculus OX=10090 GN=Set PE=1 SV=1	1.26083	0.0793985
Hspa8_K159	Hspa8	QATK*DAGTIAGLNVLR	HSP7C_MOUSE Heat shock cognate 71 kDa protein OS=Mus musculus OX=10090 GN=Hspa8 PE=1 SV=1	1.26071	0.0565053
Ncl_K132	Ncl	GAATPAK*GAK	NUCL_MOUSE Nucleolin OS=Mus musculus OX=10090 GN=Ncl PE=1 SV=2	1.26063	0.0733107
Sfpq_K458	Sfpq	LAQK*NPMYQK	SFPQ_MOUSE Splicing factor, proline- and glutamine-rich OS=Mus musculus OX=10090 GN=Sfpq PE=1 SV=1	1.26
Hnrnpab_K92	Hnrnpab	DLK*DYFTK	ROAA_MOUSE Heterogeneous nuclear ribonucleoprotein A/B OS=Mus musculus OX=10090 GN=Hnrnpab PE=1 SV=1	1.26
Glrx3_K98	Glrx3	NSQK*VDR	GLRX3_MOUSE Glutaredoxin-3 OS=Mus musculus OX=10090 GN=Glrx3 PE=1 SV=1	1.26
Ttn_K18616	Ttn	DK*LTVR	TITIN_MOUSE Titin OS=Mus musculus OX=10090 GN=Ttn PE=1 SV=1	1.26
Ppid_K171	Ppid	TLENVEVNGEK*PAK	PPID_MOUSE Peptidyl-prolyl cis-trans isomerase D OS=Mus musculus OX=10090 GN=Ppid PE=1 SV=3	1.26
Nolc1_K650	Nolc1	VADNSFDAK*R	NOLC1_MOUSE Nucleolar and coiled-body phosphoprotein 1 OS=Mus musculus OX=10090 GN=Nolc1 PE=1 SV=1	1.26
Hspa5_K475	Hspa5	VYEGERPLTK*DNHLLGTFDLTGIPPAPR	BIP_MOUSE Endoplasmic reticulum chaperone BiP OS=Mus musculus OX=10090 GN=Hspa5 PE=1 SV=3	1.26
Myh9_K1212	Myh9	VK*ATLEK	MYH9_MOUSE Myosin-9 OS=Mus musculus OX=10090 GN=Myh9 PE=1 SV=4	1.26	0.0595238
Ifi44l_K300	Ifi44l	YQFNPCEPMK*PK	IF44L_MOUSE Interferon-induced protein 44-like OS=Mus musculus OX=10090 GN=Ifi44l PE=2 SV=2	1.26	0.0654472
Got2_K338	Got2	K*QWLQEVK	AATM_MOUSE Aspartate aminotransferase, mitochondrial OS=Mus musculus OX=10090 GN=Got2 PE=1 SV=1	1.26	0.173665
Eef1a1_K215	Eef1a1	GWK*VTR	EF1A1_MOUSE Elongation factor 1-alpha 1 OS=Mus musculus OX=10090 GN=Eef1a1 PE=1 SV=3	1.26	0.221624
Rps3a_K27	Rps3a	VVDPFSK*K	RS3A_MOUSE 40S ribosomal protein S3a OS=Mus musculus OX=10090 GN=Rps3a PE=1 SV=3	1.26	0.254799
Lmna_K108	Lmna	LQLELSK*VR	LMNA_MOUSE Prelamin-A/C OS=Mus musculus OX=10090 GN=Lmna PE=1 SV=2	1.26	0.5019
Ppia_K131	Ppia	HVVFGK*VK	PPIA_MOUSE Peptidyl-prolyl cis-trans isomerase A OS=Mus musculus OX=10090 GN=Ppia PE=1 SV=2	1.26	0.57518
Impdh2_K422	Impdh2	GMGSLDAMDK*HLSSQNR	IMDH2_MOUSE Inosine-5'-monophosphate dehydrogenase 2 OS=Mus musculus OX=10090 GN=Impdh2 PE=1 SV=2	1.25938	0.281135
Psmd6_K163	Psmd6	NTEK*AK	PSMD6_MOUSE 26S proteasome non-ATPase regulatory subunit 6 OS=Mus musculus OX=10090 GN=Psmd6 PE=1 SV=1	1.25937	0.0719994
Set_K176	Set	SGK*DLTK	SET_MOUSE Protein SET OS=Mus musculus OX=10090 GN=Set PE=1 SV=1	1.25929	0.11202
Hnrnpc_K199	Hnrnpc	K*ELTQIK	HNRPC_MOUSE Heterogeneous nuclear ribonucleoproteins C1/C2 OS=Mus musculus OX=10090 GN=Hnrnpc PE=1 SV=1	1.25857	0.038571
Ncl_K80	Ncl	K*AAVTPGK	NUCL_MOUSE Nucleolin OS=Mus musculus OX=10090 GN=Ncl PE=1 SV=2	1.25813	0.06782
Mybbp1a_K1302	Mybbp1a	K*SPHPQSALPK	MBB1A_MOUSE Myb-binding protein 1A OS=Mus musculus OX=10090 GN=Mybbp1a PE=1 SV=2	1.25786	0.184878
Eef2_K407	Eef2	MVPTSDK*GR	EF2_MOUSE Elongation factor 2 OS=Mus musculus OX=10090 GN=Eef2 PE=1 SV=2	1.2575	0.191856
Npm1_K201	Npm1	DTPAK*NAQK	NPM_MOUSE Nucleophosmin OS=Mus musculus OX=10090 GN=Npm1 PE=1 SV=1	1.25667	0.010135
Pnpt1_K616	Pnpt1	VPLSK*R	PNPT1_MOUSE Polyribonucleotide nucleotidyltransferase 1, mitochondrial OS=Mus musculus OX=10090 GN=Pnpt1 PE=1 SV=1	1.25667	0.137873
Nup155_K766	Nup155	K*FQEAQLSEK	NU155_MOUSE Nuclear pore complex protein Nup155 OS=Mus musculus OX=10090 GN=Nup155 PE=1 SV=1	1.25643	0.119137
Cct2_K522	Cct2	VDNIIK*AAPR	TCPB_MOUSE T-complex protein 1 subunit beta OS=Mus musculus OX=10090 GN=Cct2 PE=1 SV=4	1.25625	0.231215
Rab5b_K183	Rab5b	KLPK*SEPQNLGGAAGR	RAB5B_MOUSE Ras-related protein Rab-5B OS=Mus musculus OX=10090 GN=Rab5b PE=1 SV=1	1.25625	0.37868
Csde1_K743	Csde1	VCEGPK*AVAAPRPDR	CSDE1_MOUSE Cold shock domain-containing protein E1 OS=Mus musculus OX=10090 GN=Csde1 PE=1 SV=1	1.25571	0.162853
Tpm3_K221	Tpm3	YSQKEDK*YEEEIK	TPM3_MOUSE Tropomyosin alpha-3 chain OS=Mus musculus OX=10090 GN=Tpm3 PE=1 SV=3	1.255	0.117429
Eif3a_K651	Eif3a	TELGAK*AFK	EIF3A_MOUSE Eukaryotic translation initiation factor 3 subunit A OS=Mus musculus OX=10090 GN=Eif3a PE=1 SV=5	1.255	0.0868208
Lcp2_K438	Lcp2	K*INQDGTFLVR	LCP2_MOUSE Lymphocyte cytosolic protein 2 OS=Mus musculus OX=10090 GN=Lcp2 PE=1 SV=2	1.255	0.231465
Calr_K276	Calr	GEWK*PR	CALR_MOUSE Calreticulin OS=Mus musculus OX=10090 GN=Calr PE=1 SV=1	1.255	0.292543
Pmvk_K48	Pmvk	LSGPLK*EEYAR	PMVK_MOUSE Phosphomevalonate kinase OS=Mus musculus OX=10090 GN=Pmvk PE=1 SV=3	1.255	0.649234
Eef2_K252	Eef2	K*VEDMMK	EF2_MOUSE Elongation factor 2 OS=Mus musculus OX=10090 GN=Eef2 PE=1 SV=2	1.25429	0.213929
Larp1_K769	Larp1	TPQLK*DSSQTPR	LARP1_MOUSE La-related protein 1 OS=Mus musculus OX=10090 GN=Larp1 PE=1 SV=3	1.25375	0.141348
Hspa8_K108	Hspa8	VQVEYK*GETK	HSP7C_MOUSE Heat shock cognate 71 kDa protein OS=Mus musculus OX=10090 GN=Hspa8 PE=1 SV=1	1.2525	0.101849
Hspa5_K353	Hspa5	VLEDSDLK*K	BIP_MOUSE Endoplasmic reticulum chaperone BiP OS=Mus musculus OX=10090 GN=Hspa5 PE=1 SV=3	1.2525	0.398426
Mrpl58_K66	Mrpl58	VPEHAK*QASSYIPLDR	ICT1_MOUSE Peptidyl-tRNA hydrolase ICT1, mitochondrial OS=Mus musculus OX=10090 GN=Mrpl58 PE=1 SV=1	1.252	0.476501
Ccar1_K143	Ccar1	SSQQQTQPQK*QR	CCAR1_MOUSE Cell division cycle and apoptosis regulator protein 1 OS=Mus musculus OX=10090 GN=Ccar1 PE=1 SV=1	1.252	0.18038
Eif3b_K246	Eif3b	LDK*QHTFR	EIF3B_MOUSE Eukaryotic translation initiation factor 3 subunit B OS=Mus musculus OX=10090 GN=Eif3b PE=1 SV=1	1.252	0.221351
Hspa4l_K351	Hspa4l	IPAVK*EQVTR	HS74L_MOUSE Heat shock 70 kDa protein 4L OS=Mus musculus OX=10090 GN=Hspa4l PE=1 SV=2	1.252	0.229544
Prdx1_K190	Prdx1	HGEVCPAGWKPGSDTIKPDVNK*SK	PRDX1_MOUSE Peroxiredoxin-1 OS=Mus musculus OX=10090 GN=Prdx1 PE=1 SV=1	1.251	0.171797
Actl6a_K371	Actl6a	ELSQK*TPPSMR	ACL6A_MOUSE Actin-like protein 6A OS=Mus musculus OX=10090 GN=Actl6a PE=1 SV=2	1.251	0.220102
Ube2d3_K8	Ube2d3	INK*ELSDLAR	UB2D3_MOUSE Ubiquitin-conjugating enzyme E2 D3 OS=Mus musculus OX=10090 GN=Ube2d3 PE=1 SV=1	1.251	0.190194
Hspa8_K597	Hspa8	NQTAEKEEFEHQQK*ELEK EEFEHQQK*ELEK	HSP7C_MOUSE Heat shock cognate 71 kDa protein OS=Mus musculus OX=10090 GN=Hspa8 PE=1 SV=1	1.25062	0.017995
Pbk_K161	Pbk	K*LLHGDIK	TOPK_MOUSE Lymphokine-activated killer T-cell-originated protein kinase OS=Mus musculus OX=10090 GN=Pbk PE=1 SV=1	1.25
Cep295_K828	Cep295	K*VIQAR	CE295_MOUSE Centrosomal protein of 295 kDa OS=Mus musculus OX=10090 GN=Cep295 PE=1 SV=3	1.25
Prkcd_K47	Prkcd	TLVQK*K	KPCD_MOUSE Protein kinase C delta type OS=Mus musculus OX=10090 GN=Prkcd PE=1 SV=3	1.25
Galk1_K301	Galk1	GDYK*AFGR	GALK1_MOUSE Galactokinase OS=Mus musculus OX=10090 GN=Galk1 PE=1 SV=2	1.25
Phb2_K250	Phb2	NPGYIK*LR	PHB2_MOUSE Prohibitin-2 OS=Mus musculus OX=10090 GN=Phb2 PE=1 SV=1	1.25
Lig3_K889	Lig3	TTEQK*LNSPSSR	DNLI3_MOUSE DNA ligase 3 OS=Mus musculus OX=10090 GN=Lig3 PE=1 SV=2	1.25
Edem3_K363	Edem3	IK*GDLR	EDEM3_MOUSE ER degradation-enhancing alpha-mannosidase-like protein 3 OS=Mus musculus OX=10090 GN=Edem3 PE=1 SV=2	1.25
Psmd11_K358	Psmd11	LSK*ADVER	PSD11_MOUSE 26S proteasome non-ATPase regulatory subunit 11 OS=Mus musculus OX=10090 GN=Psmd11 PE=1 SV=3	1.25
Bid_K129	Bid	NCLAK*ALDEVK	BID_MOUSE BH3-interacting domain death agonist OS=Mus musculus OX=10090 GN=Bid PE=1 SV=2	1.25	0.0262365
Hsp90b1_K663	Hsp90b1	IMK*AQAYQTGK	ENPL_MOUSE Endoplasmin OS=Mus musculus OX=10090 GN=Hsp90b1 PE=1 SV=2	1.25	0.0315614
Cars1_K131	Cars1	DVFIPQDGK*K	SYCC_MOUSE Cysteine--tRNA ligase, cytoplasmic OS=Mus musculus OX=10090 GN=Cars1 PE=1 SV=2	1.25	0.10099
Prdx1_K178	Prdx1	HGEVCPAGWK*PGSDTIKPDVNK	PRDX1_MOUSE Peroxiredoxin-1 OS=Mus musculus OX=10090 GN=Prdx1 PE=1 SV=1	1.25	0.227641
Psmd2_K66	Psmd2	LGEK*DTSLYRPALEELR	PSMD2_MOUSE 26S proteasome non-ATPase regulatory subunit 2 OS=Mus musculus OX=10090 GN=Psmd2 PE=1 SV=1	1.25	0.263882
gag_K441	gag	SPTNLAK*VK	GGAG_MLVMN Glyco-Gag protein OS=Moloney murine leukemia virus (strain neuropathogenic variant ts1-92b) OX=882209 GN=gag PE=3 SV=2	1.25	0.44478
Ywhae_K78	Ywhae	EENKGGEDK*LK	1433E_MOUSE 14-3-3 protein epsilon OS=Mus musculus OX=10090 GN=Ywhae PE=1 SV=1	1.25	0.352702
Hmgb2_K59	Hmgb2	SK*FEDLAK K*FEDLAK	HMGB2_MOUSE High mobility group protein B2 OS=Mus musculus OX=10090 GN=Hmgb2 PE=1 SV=3	1.24917	0.17256
Farsb_K88	Farsb	GLQVFK*ER	SYFB_MOUSE Phenylalanine--tRNA ligase beta subunit OS=Mus musculus OX=10090 GN=Farsb PE=1 SV=2	1.24833	0.266455
Ywhaz_K75	Ywhaz	K*QQMAR	1433Z_MOUSE 14-3-3 protein zeta/delta OS=Mus musculus OX=10090 GN=Ywhaz PE=1 SV=1	1.24833	0.351514
Yars1_K147	Yars1	K*AGAEVVK	SYYC_MOUSE Tyrosine--tRNA ligase, cytoplasmic OS=Mus musculus OX=10090 GN=Yars1 PE=1 SV=3	1.24813	0.140954
Hspa8_K589	Hspa8	NQTAEK*EEFEHQQK	HSP7C_MOUSE Heat shock cognate 71 kDa protein OS=Mus musculus OX=10090 GN=Hspa8 PE=1 SV=1	1.248	0.346927
Brd2_K659	Brd2	LPGEK*LGR	BRD2_MOUSE Bromodomain-containing protein 2 OS=Mus musculus OX=10090 GN=Brd2 PE=1 SV=1	1.24786	0.121167
Rpl7l1_K159	Rpl7l1	GQAK*INNK	RL7L_MOUSE 60S ribosomal protein L7-like 1 OS=Mus musculus OX=10090 GN=Rpl7l1 PE=1 SV=1	1.247	0.0983461
Thrap3_K252	Thrap3	SPALK*SPLQSVVVR	TR150_MOUSE Thyroid hormone receptor-associated protein 3 OS=Mus musculus OX=10090 GN=Thrap3 PE=1 SV=1	1.24667	0.110303
Actr3_K348	Actr3	LK*LSEELSGGR	ARP3_MOUSE Actin-related protein 3 OS=Mus musculus OX=10090 GN=Actr3 PE=1 SV=3	1.24583	0.138918
Hnrnpu_K176	Hnrnpu	GAGK*EAAGK	HNRPU_MOUSE Heterogeneous nuclear ribonucleoprotein U OS=Mus musculus OX=10090 GN=Hnrnpu PE=1 SV=1	1.24562	0.0520838
Papola_K144	Papola	LQEEVK*DLR	PAPOA_MOUSE Poly(A) polymerase alpha OS=Mus musculus OX=10090 GN=Papola PE=1 SV=4	1.245
Cfl1_K92	Cfl1	YALYDATYETK*ESK	COF1_MOUSE Cofilin-1 OS=Mus musculus OX=10090 GN=Cfl1 PE=1 SV=3	1.245	0.0903185
Rpl29_K120	Rpl29	LCQPK*PK	RL29_MOUSE 60S ribosomal protein L29 OS=Mus musculus OX=10090 GN=Rpl29 PE=1 SV=2	1.245	0.524953
Tpd52_K137	Tpd52	K*TSETLSQAGQK	TPD52_MOUSE Tumor protein D52 OS=Mus musculus OX=10090 GN=Tpd52 PE=1 SV=2	1.245	0.615432
Eef1a1_K444	Eef1a1	K*AAGAGK	EF1A1_MOUSE Elongation factor 1-alpha 1 OS=Mus musculus OX=10090 GN=Eef1a1 PE=1 SV=3	1.24438	0.067274
Rpl29_K145	Rpl29	AQASAPAQAPK*GAQAPK	RL29_MOUSE 60S ribosomal protein L29 OS=Mus musculus OX=10090 GN=Rpl29 PE=1 SV=2	1.24429	0.0777399
Rpl10_K101	Rpl10	INK*MLSCAGADR	RL10_MOUSE 60S ribosomal protein L10 OS=Mus musculus OX=10090 GN=Rpl10 PE=1 SV=3	1.24375	0.185463
Myh9_K1793	Myh9	AK*LQEMESAVK	MYH9_MOUSE Myosin-9 OS=Mus musculus OX=10090 GN=Myh9 PE=1 SV=4	1.24357	0.0863079
Cap1_K281	Cap1	THK*NPALK	CAP1_MOUSE Adenylyl cyclase-associated protein 1 OS=Mus musculus OX=10090 GN=Cap1 PE=1 SV=4	1.24357	0.132574
Rpn1_K517	Rpn1	DISTLNSGK*K	RPN1_MOUSE Dolichyl-diphosphooligosaccharide--protein glycosyltransferase subunit 1 OS=Mus musculus OX=10090 GN=Rpn1 PE=1 SV=1	1.24333	0.037374
Pgk1_K267	Pgk1	IVK*DLMSK	PGK1_MOUSE Phosphoglycerate kinase 1 OS=Mus musculus OX=10090 GN=Pgk1 PE=1 SV=4	1.24333	0.0955982
Arhgdia_K52	Arhgdia	YK*EALLGR	GDIR1_MOUSE Rho GDP-dissociation inhibitor 1 OS=Mus musculus OX=10090 GN=Arhgdia PE=1 SV=3	1.24333	0.3171
Ranbp1_K182	Ranbp1	VAEK*LEALSVR	RANG_MOUSE Ran-specific GTPase-activating protein OS=Mus musculus OX=10090 GN=Ranbp1 PE=1 SV=2	1.24333	0.386598
Atp5f1e_K37	Atp5f1e	ANAEK*TSGSSIK	ATP5E_MOUSE ATP synthase subunit epsilon, mitochondrial OS=Mus musculus OX=10090 GN=Atp5f1e PE=1 SV=2	1.24333	0.142717
H1-3_K33	H1-3	TGAAAGK*R	H13_MOUSE Histone H1.3 OS=Mus musculus OX=10090 GN=H1-3 PE=1 SV=2	1.2425	0.0847966
Rbmxl1_K147	Rbmxl1	GPLPVK*R	RMXL1_MOUSE RNA binding motif protein, X-linked-like-1 OS=Mus musculus OX=10090 GN=Rbmxl1 PE=2 SV=1	1.24143	0.160264
Mipep_K124	Mipep	VADLADFVK*IGHPDPAFR	MIPEP_MOUSE Mitochondrial intermediate peptidase OS=Mus musculus OX=10090 GN=Mipep PE=1 SV=1	1.24125	0.14326
Ptpn6_K34	Ptpn6	K*NQGDFSLSVR	PTN6_MOUSE Tyrosine-protein phosphatase non-receptor type 6 OS=Mus musculus OX=10090 GN=Ptpn6 PE=1 SV=2	1.24125	0.196975
Stub1_K204	Stub1	AQQACIEAK*HDK	CHIP_MOUSE E3 ubiquitin-protein ligase CHIP OS=Mus musculus OX=10090 GN=Stub1 PE=1 SV=1	1.241	0.542822
Eef1a1_K386	Eef1a1	K*LEDGPK	EF1A1_MOUSE Elongation factor 1-alpha 1 OS=Mus musculus OX=10090 GN=Eef1a1 PE=1 SV=3	1.24063	0.126161
Ddx5_K33	Ddx5	K*FGNPGEK	DDX5_MOUSE Probable ATP-dependent RNA helicase DDX5 OS=Mus musculus OX=10090 GN=Ddx5 PE=1 SV=2	1.24	0.252348
Txnrd2_K376	Txnrd2	AGK*LLAQR	TRXR2_MOUSE Thioredoxin reductase 2, mitochondrial OS=Mus musculus OX=10090 GN=Txnrd2 PE=1 SV=4	1.24
Unc45a_K142	Unc45a	NIGGQIQEK*VR	UN45A_MOUSE Protein unc-45 homolog A OS=Mus musculus OX=10090 GN=Unc45a PE=1 SV=2	1.24
Arhgap45_K483	Arhgap45	QELEDTK*VTALR	HMHA1_MOUSE Rho GTPase-activating protein 45 OS=Mus musculus OX=10090 GN=Arhgap45 PE=1 SV=2	1.24
Mtor_K2066	Mtor	GPQTLK*ETSFNQAYGR	MTOR_MOUSE Serine/threonine-protein kinase mTOR OS=Mus musculus OX=10090 GN=Mtor PE=1 SV=2	1.24
Slc1a5_K379	Slc1a5	CVEEK*NGVAK	AAAT_MOUSE Neutral amino acid transporter B(0) OS=Mus musculus OX=10090 GN=Slc1a5 PE=1 SV=2	1.24
Arhgap45_K865	Arhgap45	AEAEAK*AASR	HMHA1_MOUSE Rho GTPase-activating protein 45 OS=Mus musculus OX=10090 GN=Arhgap45 PE=1 SV=2	1.24
Supt5h_K342	Supt5h	LFDAEK*IR	SPT5H_MOUSE Transcription elongation factor SPT5 OS=Mus musculus OX=10090 GN=Supt5h PE=1 SV=1	1.24
Mdh2_K301	Mdh2	GLEK*NLGIGK	MDHM_MOUSE Malate dehydrogenase, mitochondrial OS=Mus musculus OX=10090 GN=Mdh2 PE=1 SV=3	1.24	0.0207429
Cct5_K279	Cct5	ALQK*YEK	TCPE_MOUSE T-complex protein 1 subunit epsilon OS=Mus musculus OX=10090 GN=Cct5 PE=1 SV=1	1.24	0.0528907
Vapa_K211	Vapa	VAHSDK*PGSTSAVSFR	VAPA_MOUSE Vesicle-associated membrane protein-associated protein A OS=Mus musculus OX=10090 GN=Vapa PE=1 SV=2	1.24	0.204973
Hspa5_K371	Hspa5	IPK*IQQLVK	BIP_MOUSE Endoplasmic reticulum chaperone BiP OS=Mus musculus OX=10090 GN=Hspa5 PE=1 SV=3	1.23937	0.0849373
Gars1_K636	Gars1	NGVSHK*VDDSSGSIGR	GARS_MOUSE Glycine--tRNA ligase OS=Mus musculus OX=10090 GN=Gars1 PE=1 SV=1	1.23917	0.10535
Pgk1_K133	Pgk1	GK*DASGNK FHVEEEGKGK*DASGNK	PGK1_MOUSE Phosphoglycerate kinase 1 OS=Mus musculus OX=10090 GN=Pgk1 PE=1 SV=4	1.239	0.195265
Hnrnpa3_K199	Hnrnpa3	YHTINGHNCEVK*K	ROA3_MOUSE Heterogeneous nuclear ribonucleoprotein A3 OS=Mus musculus OX=10090 GN=Hnrnpa3 PE=1 SV=1	1.239	0.322671
Sdha_K250	Sdha	AK*NTVIATGGYGR	SDHA_MOUSE Succinate dehydrogenase [ubiquinone] flavoprotein subunit, mitochondrial OS=Mus musculus OX=10090 GN=Sdha PE=1 SV=1	1.239	0.117977
Hsp90aa1_K84	Hsp90aa1	ELHINLIPSK*QDR	HS90A_MOUSE Heat shock protein HSP 90-alpha OS=Mus musculus OX=10090 GN=Hsp90aa1 PE=1 SV=4	1.23875	0.255105
Hnrnpu_K578	Hnrnpu	K*AVVVCPK	HNRPU_MOUSE Heterogeneous nuclear ribonucleoprotein U OS=Mus musculus OX=10090 GN=Hnrnpu PE=1 SV=1	1.23786	0.122553
Eef1b_K66	Eef1b	EK*ASLPGVK	EF1B_MOUSE Elongation factor 1-beta OS=Mus musculus OX=10090 GN=Eef1b PE=1 SV=5	1.2375	0.114858
Hmgb3_K3	Hmgb3	AK*GDPK	HMGB3_MOUSE High mobility group protein B3 OS=Mus musculus OX=10090 GN=Hmgb3 PE=1 SV=3	1.2375	0.576973
Hspe1_K36	Hspe1	GGIMLPEK*SQGK	CH10_MOUSE 10 kDa heat shock protein, mitochondrial OS=Mus musculus OX=10090 GN=Hspe1 PE=1 SV=2	1.2375	0.0543785
Myh9_K860	Myh9	EK*HLAAENR	MYH9_MOUSE Myosin-9 OS=Mus musculus OX=10090 GN=Myh9 PE=1 SV=4	1.2375	0.222474
Ssb_K311	Ssb	VLEGHAEK*EALKK VLEGHAEK*EALK	LA_MOUSE Lupus La protein homolog OS=Mus musculus OX=10090 GN=Ssb PE=1 SV=1	1.23714	0.193361
Mia3_K1267	Mia3	LSSYEQK*IK	TGO1_MOUSE Transport and Golgi organization protein 1 homolog OS=Mus musculus OX=10090 GN=Mia3 PE=1 SV=2	1.237	0.275091
Tpt1_K93	Tpt1	YIK*DYMK	TCTP_MOUSE Translationally-controlled tumor protein OS=Mus musculus OX=10090 GN=Tpt1 PE=1 SV=1	1.23667	0.386703
Tmod3_K169	Tmod3	FPNVVK*GEK	TMOD3_MOUSE Tropomodulin-3 OS=Mus musculus OX=10090 GN=Tmod3 PE=1 SV=1	1.235	0.311798
Hist2h2bb_K21	Hist2h2bb	AVTK*VQK	H2B2B_MOUSE Histone H2B type 2-B OS=Mus musculus OX=10090 GN=Hist2h2bb PE=1 SV=3	1.235	0.0167033
Rsl1d1_K414	Rsl1d1	K*DVQEFR	RL1D1_MOUSE Ribosomal L1 domain-containing protein 1 OS=Mus musculus OX=10090 GN=Rsl1d1 PE=1 SV=1	1.235	0.440949
Atp5f1a_K531	Atp5f1a	SDGK*ISEQSDAK	ATPA_MOUSE ATP synthase subunit alpha, mitochondrial OS=Mus musculus OX=10090 GN=Atp5f1a PE=1 SV=1	1.23429	0.0912768
Rpl5_K242	Rpl5	K*AHAAIR	RL5_MOUSE 60S ribosomal protein L5 OS=Mus musculus OX=10090 GN=Rpl5 PE=1 SV=3	1.23429	0.189011
H1-2_K117	H1-2	AASGEAK*PQAK	H12_MOUSE Histone H1.2 OS=Mus musculus OX=10090 GN=H1-2 PE=1 SV=2	1.23375	0.258886
Pdia6_K85	Pdia6	VGAVNADK*HQSLGGQYGVQGFPTIK	PDIA6_MOUSE Protein disulfide-isomerase A6 OS=Mus musculus OX=10090 GN=Pdia6 PE=1 SV=3	1.23357	0.346267
Msn_K3	Msn	PK*TISVR	MOES_MOUSE Moesin OS=Mus musculus OX=10090 GN=Msn PE=1 SV=3	1.23333	0.103887
Etf1_K22	Etf1	LIK*SLEAAR	ERF1_MOUSE Eukaryotic peptide chain release factor subunit 1 OS=Mus musculus OX=10090 GN=Etf1 PE=1 SV=4	1.23333	0.119339
Ppid_K351	Ppid	VK*QMIK	PPID_MOUSE Peptidyl-prolyl cis-trans isomerase D OS=Mus musculus OX=10090 GN=Ppid PE=1 SV=3	1.233	0.18223
Ddx46_K1011	Ddx46	LIK*EELIR	DDX46_MOUSE Probable ATP-dependent RNA helicase DDX46 OS=Mus musculus OX=10090 GN=Ddx46 PE=1 SV=2	1.2325	0.101229
Ube2k_K14	Ube2k	EFK*EVLK	UBE2K_MOUSE Ubiquitin-conjugating enzyme E2 K OS=Mus musculus OX=10090 GN=Ube2k PE=1 SV=3	1.2325	0.216616
Atp5f1a_K161	Atp5f1a	VVDALGNAIDGK*GPIGSK	ATPA_MOUSE ATP synthase subunit alpha, mitochondrial OS=Mus musculus OX=10090 GN=Atp5f1a PE=1 SV=1	1.2325	0.694953
Vapa_K52	Vapa	VK*TTAPR	VAPA_MOUSE Vesicle-associated membrane protein-associated protein A OS=Mus musculus OX=10090 GN=Vapa PE=1 SV=2	1.232	0.181928
Ncl_K71	Ncl	K*AAVPTPAK	NUCL_MOUSE Nucleolin OS=Mus musculus OX=10090 GN=Ncl PE=1 SV=2	1.23187	0.0688128
Cdc37_K60	Cdc37	K*VAECQR	CDC37_MOUSE Hsp90 co-chaperone Cdc37 OS=Mus musculus OX=10090 GN=Cdc37 PE=1 SV=1	1.23167	0.491186
Ran_K60	Ran	GPIK*FNVWDTAGQEK	RAN_MOUSE GTP-binding nuclear protein Ran OS=Mus musculus OX=10090 GN=Ran PE=1 SV=3	1.23125	0.136698
Trim28_K189	Trim28	YTK*DHTVR	TIF1B_MOUSE Transcription intermediary factor 1-beta OS=Mus musculus OX=10090 GN=Trim28 PE=1 SV=3	1.23125	0.490452
Vps4b_K147	Vps4b	EALK*EAVILPIK	VPS4B_MOUSE Vacuolar protein sorting-associated protein 4B OS=Mus musculus OX=10090 GN=Vps4b PE=1 SV=2	1.23
Dnajc2_K527	Dnajc2	K*EHGVASQADSAAPSER	DNJC2_MOUSE DnaJ homolog subfamily C member 2 OS=Mus musculus OX=10090 GN=Dnajc2 PE=1 SV=2	1.23
Ube2c_K163	Ube2c	NPTAFK*K	UBE2C_MOUSE Ubiquitin-conjugating enzyme E2 C OS=Mus musculus OX=10090 GN=Ube2c PE=1 SV=1	1.23
Tln1_K1645	Tln1	TVSDSIK*K	TLN1_MOUSE Talin-1 OS=Mus musculus OX=10090 GN=Tln1 PE=1 SV=2	1.23
Ranbp1_K76	Ranbp1	GTGDVK*LLK	RANG_MOUSE Ran-specific GTPase-activating protein OS=Mus musculus OX=10090 GN=Ranbp1 PE=1 SV=2	1.23
H1-3_K17	H1-3	SETAPAAPAAPAPVEK*TPVK	H13_MOUSE Histone H1.3 OS=Mus musculus OX=10090 GN=H1-3 PE=1 SV=2	1.23
Rrp15_K149	Rrp15	VK*PDVVK	RRP15_MOUSE RRP15-like protein OS=Mus musculus OX=10090 GN=Rrp15 PE=1 SV=2	1.23
Tmpo_K562	Tmpo	AATQASSTESCDK*HLDLALCR	LAP2A_MOUSE Lamina-associated polypeptide 2, isoforms alpha/zeta OS=Mus musculus OX=10090 GN=Tmpo PE=1 SV=4	1.23
Rpl32_K109	Rpl32	K*AIVER	RL32_MOUSE 60S ribosomal protein L32 OS=Mus musculus OX=10090 GN=Rpl32 PE=1 SV=2	1.23	0.558706
Eef1d_K117	Eef1d	LSSLEK*SSPTPR	EF1D_MOUSE Elongation factor 1-delta OS=Mus musculus OX=10090 GN=Eef1d PE=1 SV=3	1.23	0.562215
H2ax_K134	H2ax	APAVGK*K	H2AX_MOUSE Histone H2AX OS=Mus musculus OX=10090 GN=H2ax PE=1 SV=2	1.22938	0.0272823
Atp5if1_K103	Atp5if1	IQQLK*NNH	ATIF1_MOUSE ATPase inhibitor, mitochondrial OS=Mus musculus OX=10090 GN=Atp5if1 PE=1 SV=2	1.22929	0.028518
Hspa4_K687	Hspa4	SLGQPIK*TR	HSP74_MOUSE Heat shock 70 kDa protein 4 OS=Mus musculus OX=10090 GN=Hspa4 PE=1 SV=1	1.22929	0.0412258
Tcp1_K532	Tcp1	IDDLIK*LHPESK	TCPA_MOUSE T-complex protein 1 subunit alpha OS=Mus musculus OX=10090 GN=Tcp1 PE=1 SV=3	1.229	0.253612
Snrnp200_K285	Snrnp200	K*ADEVLEILK	U520_MOUSE U5 small nuclear ribonucleoprotein 200 kDa helicase OS=Mus musculus OX=10090 GN=Snrnp200 PE=1 SV=1	1.229	0.261923
Cct3_K527	Cct3	IDDIVSGHK*K	TCPG_MOUSE T-complex protein 1 subunit gamma OS=Mus musculus OX=10090 GN=Cct3 PE=1 SV=1	1.229	0.438567
Eef1a1_K450	Eef1a1	AAGAGK*VTK	EF1A1_MOUSE Elongation factor 1-alpha 1 OS=Mus musculus OX=10090 GN=Eef1a1 PE=1 SV=3	1.22875	0.05915
Hnrnpa3_K126	Hnrnpa3	EDSVKPGAHLTVK*K	ROA3_MOUSE Heterogeneous nuclear ribonucleoprotein A3 OS=Mus musculus OX=10090 GN=Hnrnpa3 PE=1 SV=1	1.22875	0.46866
Kif2c_K101	Kif2c	IPALK*EGLR	KIF2C_MOUSE Kinesin-like protein KIF2C OS=Mus musculus OX=10090 GN=Kif2c PE=1 SV=1	1.22833	0.346484
Nudt9_K186	Nudt9	DESGNK*ITHPVSGK	NUDT9_MOUSE ADP-ribose pyrophosphatase, mitochondrial OS=Mus musculus OX=10090 GN=Nudt9 PE=1 SV=1	1.2275	0.175833
Ubtf_K284	Ubtf	STLTK*AER	UBF1_MOUSE Nucleolar transcription factor 1 OS=Mus musculus OX=10090 GN=Ubtf PE=1 SV=1	1.2275	0.303505
Calr_K43	Calr	HK*SDFGK	CALR_MOUSE Calreticulin OS=Mus musculus OX=10090 GN=Calr PE=1 SV=1	1.22714	0.252678
Pgd_K59	Pgd	VVGAQSLK*DMVSK	6PGD_MOUSE 6-phosphogluconate dehydrogenase, decarboxylating OS=Mus musculus OX=10090 GN=Pgd PE=1 SV=3	1.22667	0.376593
Eno1_K197	Eno1	NVIK*EK	ENOA_MOUSE Alpha-enolase OS=Mus musculus OX=10090 GN=Eno1 PE=1 SV=3	1.22667	0.609079
Pdcd5_K20	Pdcd5	LAELQAK*HGDPGDAAQQEAK	PDCD5_MOUSE Programmed cell death protein 5 OS=Mus musculus OX=10090 GN=Pdcd5 PE=1 SV=3	1.22667	0.621486
Hnrnpu_K650	Hnrnpu	LLEQYKEESK*K	HNRPU_MOUSE Heterogeneous nuclear ribonucleoprotein U OS=Mus musculus OX=10090 GN=Hnrnpu PE=1 SV=1	1.226	0.139201
Hsp90b1_K603	Hsp90b1	FDESEK*TK	ENPL_MOUSE Endoplasmin OS=Mus musculus OX=10090 GN=Hsp90b1 PE=1 SV=2	1.225
Rbmxl1_K214	Rbmxl1	DDGYSTK*DSYSSR	RMXL1_MOUSE RNA binding motif protein, X-linked-like-1 OS=Mus musculus OX=10090 GN=Rbmxl1 PE=2 SV=1	1.225	0.0704182
Ncl_K79	Ncl	AAVPTPAK*K	NUCL_MOUSE Nucleolin OS=Mus musculus OX=10090 GN=Ncl PE=1 SV=2	1.225	0.22116
Atp5f1b_K522	Atp5f1b	ADK*LAEEHGS	ATPB_MOUSE ATP synthase subunit beta, mitochondrial OS=Mus musculus OX=10090 GN=Atp5f1b PE=1 SV=2	1.225	0.277964
Sh3bgrl3_K18	Sh3bgrl3	IK*SQQSEVTR EIK*SQQSEVTR	SH3L3_MOUSE SH3 domain-binding glutamic acid-rich-like protein 3 OS=Mus musculus OX=10090 GN=Sh3bgrl3 PE=1 SV=1	1.225	0.574554
Hdlbp_K510	Hdlbp	TK*DLIIEQR	VIGLN_MOUSE Vigilin OS=Mus musculus OX=10090 GN=Hdlbp PE=1 SV=1	1.225	0.68372
Csde1_K239	Csde1	NGK*EVATDVR	CSDE1_MOUSE Cold shock domain-containing protein E1 OS=Mus musculus OX=10090 GN=Csde1 PE=1 SV=1	1.224	0.361306
Rps6_K119	Rps6	KGEK*DIPGLTDTTVPR	RS6_MOUSE 40S ribosomal protein S6 OS=Mus musculus OX=10090 GN=Rps6 PE=1 SV=1	1.22333	0.0362412
Bzw1_K8	Bzw1	QQK*PTLSGQR	BZW1_MOUSE Basic leucine zipper and W2 domain-containing protein 1 OS=Mus musculus OX=10090 GN=Bzw1 PE=1 SV=1	1.22333	0.567219
Ncl_K384	Ncl	LEKPK*GR	NUCL_MOUSE Nucleolin OS=Mus musculus OX=10090 GN=Ncl PE=1 SV=2	1.22286	0.0811916
Hcls1_K69	Hcls1	VSEEHDILK*K	HCLS1_MOUSE Hematopoietic lineage cell-specific protein OS=Mus musculus OX=10090 GN=Hcls1 PE=1 SV=2	1.22286	0.100467
Gdi2_K164	Gdi2	TFEGVDPK*K	GDIB_MOUSE Rab GDP dissociation inhibitor beta OS=Mus musculus OX=10090 GN=Gdi2 PE=1 SV=1	1.22286	0.245112
Eef1g_K275	Eef1g	AAAPAPEEEMDECEQALAAEPK*AK	EF1G_MOUSE Elongation factor 1-gamma OS=Mus musculus OX=10090 GN=Eef1g PE=1 SV=3	1.2225	0.187509
Ywhab_K77	Ywhab	K*QQMGK	1433B_MOUSE 14-3-3 protein beta/alpha OS=Mus musculus OX=10090 GN=Ywhab PE=1 SV=3	1.2225	0.250821
Tln1_K2464	Tln1	LQAAGNAVK*R	TLN1_MOUSE Talin-1 OS=Mus musculus OX=10090 GN=Tln1 PE=1 SV=2	1.2225	0.265508
Npm1_K27	Npm1	ADK*DYHFK	NPM_MOUSE Nucleophosmin OS=Mus musculus OX=10090 GN=Npm1 PE=1 SV=1	1.22188	0.107506
Myh9_K1459	Myh9	TISAK*YAEER	MYH9_MOUSE Myosin-9 OS=Mus musculus OX=10090 GN=Myh9 PE=1 SV=4	1.22167	0.114114
Pkm_K261	Pkm	VLGEK*GK	KPYM_MOUSE Pyruvate kinase PKM OS=Mus musculus OX=10090 GN=Pkm PE=1 SV=4	1.22125	0.107704
Rps3_K201	Rps3	IGPK*KPLPDHVSIVEPK	RS3_MOUSE 40S ribosomal protein S3 OS=Mus musculus OX=10090 GN=Rps3 PE=1 SV=1	1.22063	0.0321958
Rpl14_K160	Rpl14	AAIAAAAAAAAAK*AK	RL14_MOUSE 60S ribosomal protein L14 OS=Mus musculus OX=10090 GN=Rpl14 PE=1 SV=3	1.22
Cct5_K170	Cct5	VLVDINNPEPLIQTAK*TTLGSK	TCPE_MOUSE T-complex protein 1 subunit epsilon OS=Mus musculus OX=10090 GN=Cct5 PE=1 SV=1	1.22
Sash1_K1099	Sash1	LQAEGIDLTEEPYSDK*HGR	SASH1_MOUSE SAM and SH3 domain-containing protein 1 OS=Mus musculus OX=10090 GN=Sash1 PE=1 SV=1	1.22
Mia2_K1074	Mia2	K*ENAHNR	MIA2_MOUSE Melanoma inhibitory activity protein 2 OS=Mus musculus OX=10090 GN=Mia2 PE=1 SV=3	1.22
Zc3hav1_K556	Zc3hav1	VAASGSPGK*SSTHASVSPASEPSR	ZCCHV_MOUSE Zinc finger CCCH-type antiviral protein 1 OS=Mus musculus OX=10090 GN=Zc3hav1 PE=1 SV=1	1.22
Pgm2l1_K244	Pgm2l1	MEDIK*K	PGM2L_MOUSE Glucose 1,6-bisphosphate synthase OS=Mus musculus OX=10090 GN=Pgm2l1 PE=1 SV=1	1.22
Hsph1_K126	Hsph1	LK*ETAENNLK	HS105_MOUSE Heat shock protein 105 kDa OS=Mus musculus OX=10090 GN=Hsph1 PE=1 SV=2	1.22
Stip1_K395	Stip1	DAK*LYSNR	STIP1_MOUSE Stress-induced-phosphoprotein 1 OS=Mus musculus OX=10090 GN=Stip1 PE=1 SV=1	1.22
Immt_K343	Immt	K*VQAAQSEAK	MIC60_MOUSE MICOS complex subunit Mic60 OS=Mus musculus OX=10090 GN=Immt PE=1 SV=1	1.22	1.03122718368665E 18
Tcp1_K126	Tcp1	LACK*EAVR	TCPA_MOUSE T-complex protein 1 subunit alpha OS=Mus musculus OX=10090 GN=Tcp1 PE=1 SV=3	1.22	0.167575
Hmga1_K15	Hmga1	SSQPLASK*QEK	HMGA1_MOUSE High mobility group protein HMG-I/HMG-Y OS=Mus musculus OX=10090 GN=Hmga1 PE=1 SV=4	1.22	0.321926
Keap1_K323	Keap1	APK*VGR	KEAP1_MOUSE Kelch-like ECH-associated protein 1 OS=Mus musculus OX=10090 GN=Keap1 PE=1 SV=1	1.22	0.5
Gapdh_K252	Gapdh	LEKPAK*YDDIKK	G3P_MOUSE Glyceraldehyde-3-phosphate dehydrogenase OS=Mus musculus OX=10090 GN=Gapdh PE=1 SV=2	1.21929	0.0744969
Kars1_K173	Kars1	SEEEFVHINNK*LR	SYK_MOUSE Lysine--tRNA ligase OS=Mus musculus OX=10090 GN=Kars1 PE=1 SV=1	1.21833	0.433162
Hnrnpf_K224	Hnrnpf	YIGIVK*QAGLDR	HNRPF_MOUSE Heterogeneous nuclear ribonucleoprotein F OS=Mus musculus OX=10090 GN=Hnrnpf PE=1 SV=3	1.21833	0.514745
Rpl14_K189	Rpl14	AAGQK*AAPPAK	RL14_MOUSE 60S ribosomal protein L14 OS=Mus musculus OX=10090 GN=Rpl14 PE=1 SV=3	1.21786	0.126957
Ran_K127	Ran	VDIK*DR	RAN_MOUSE GTP-binding nuclear protein Ran OS=Mus musculus OX=10090 GN=Ran PE=1 SV=3	1.2175	0.234252
Pkm_K135	Pkm	GSGTAEVELK*K	KPYM_MOUSE Pyruvate kinase PKM OS=Mus musculus OX=10090 GN=Pkm PE=1 SV=4	1.2175	0.243088
Mrpl58_K98	Mrpl58	VNSK*AEVR	ICT1_MOUSE Peptidyl-tRNA hydrolase ICT1, mitochondrial OS=Mus musculus OX=10090 GN=Mrpl58 PE=1 SV=1	1.217	0.0241285
Sec31a_K791	Sec31a	AQGK*PVSGQESSQSPYER	SC31A_MOUSE Protein transport protein Sec31A OS=Mus musculus OX=10090 GN=Sec31a PE=1 SV=2	1.21667	0.269856
Pgk1_K11	Pgk1	LTLDK*LDVK	PGK1_MOUSE Phosphoglycerate kinase 1 OS=Mus musculus OX=10090 GN=Pgk1 PE=1 SV=4	1.21667	0.256402
Eno1_K89	Eno1	KVNVVEQEK*IDK	ENOA_MOUSE Alpha-enolase OS=Mus musculus OX=10090 GN=Eno1 PE=1 SV=3	1.21667	0.330925
Fh_K470	Fh	IAK*TAHK	FUMH_MOUSE Fumarate hydratase, mitochondrial OS=Mus musculus OX=10090 GN=Fh PE=1 SV=3	1.21625	0.385174
Rpl13a_K191	Rpl13a	ICK*FTEVLK	RL13A_MOUSE 60S ribosomal protein L13a OS=Mus musculus OX=10090 GN=Rpl13a PE=1 SV=4	1.21583	0.0160619
Pdia3_K415	Pdia3	NLEPK*YK	PDIA3_MOUSE Protein disulfide-isomerase A3 OS=Mus musculus OX=10090 GN=Pdia3 PE=1 SV=2	1.215	0.0844607
Rnf213_K1109	Rnf213	LPSQEK*ACDVR	RN213_MOUSE E3 ubiquitin-protein ligase RNF213 OS=Mus musculus OX=10090 GN=Rnf213 PE=1 SV=2	1.215	0.130885
Cap1_K316	Cap1	K*EPALLELEGK	CAP1_MOUSE Adenylyl cyclase-associated protein 1 OS=Mus musculus OX=10090 GN=Cap1 PE=1 SV=4	1.215	0.220449
Rps11_K45	Rps11	NIGLGFK*TPK	RS11_MOUSE 40S ribosomal protein S11 OS=Mus musculus OX=10090 GN=Rps11 PE=1 SV=3	1.215	0.272509
Ube2i_K18	Ube2i	K*DHPFGFVAVPTK	UBC9_MOUSE SUMO-conjugating enzyme UBC9 OS=Mus musculus OX=10090 GN=Ube2i PE=1 SV=1	1.215	0.397495
Hnrnpd_K197	Hnrnpd	IFVGGLSPDTPEEK*IR	HNRPD_MOUSE Heterogeneous nuclear ribonucleoprotein D0 OS=Mus musculus OX=10090 GN=Hnrnpd PE=1 SV=2	1.215	0.027987
Nolc1_K356	Nolc1	TVVSK*TPAK	NOLC1_MOUSE Nucleolar and coiled-body phosphoprotein 1 OS=Mus musculus OX=10090 GN=Nolc1 PE=1 SV=1	1.215	0.321198
Acsl5_K361	Acsl5	VYDK*VQNEAK	ACSL5_MOUSE Long-chain-fatty-acid--CoA ligase 5 OS=Mus musculus OX=10090 GN=Acsl5 PE=1 SV=1	1.21417	0.255181
Aimp1_K33	Aimp1	QQVALLK*EK	AIMP1_MOUSE Aminoacyl tRNA synthase complex-interacting multifunctional protein 1 OS=Mus musculus OX=10090 GN=Aimp1 PE=1 SV=2	1.21375	0.207105
Hmgb2_K114	Hmgb2	IK*IEHPGLSIGDTAK	HMGB2_MOUSE High mobility group protein B2 OS=Mus musculus OX=10090 GN=Hmgb2 PE=1 SV=3	1.21375	0.19007
Pgk1_K353	Pgk1	GTK*SLMDEVVK	PGK1_MOUSE Phosphoglycerate kinase 1 OS=Mus musculus OX=10090 GN=Pgk1 PE=1 SV=4	1.21357	0.11727
Rpl27a_K94	Rpl27a	NK*TGVAPIIDVVR	RL27A_MOUSE 60S ribosomal protein L27a OS=Mus musculus OX=10090 GN=Rpl27a PE=1 SV=5	1.21333	0.174999
Myh9_K972	Myh9	VTTEAK*LK	MYH9_MOUSE Myosin-9 OS=Mus musculus OX=10090 GN=Myh9 PE=1 SV=4	1.21333	0.441043
Pnpt1_K456	Pnpt1	ELGHGALAEK*ALCPVIPK	PNPT1_MOUSE Polyribonucleotide nucleotidyltransferase 1, mitochondrial OS=Mus musculus OX=10090 GN=Pnpt1 PE=1 SV=1	1.21333	0.559865
Cltc_K760	Cltc	VK*NFLK	CLH1_MOUSE Clathrin heavy chain 1 OS=Mus musculus OX=10090 GN=Cltc PE=1 SV=3	1.2125	0.488508
Tkt_K16	Tkt	LQALK*DTANR	TKT_MOUSE Transketolase OS=Mus musculus OX=10090 GN=Tkt PE=1 SV=1	1.212	0.121142
Psme3_K121	Psme3	SNQQLVDIIEK*VKPEIR	PSME3_MOUSE Proteasome activator complex subunit 3 OS=Mus musculus OX=10090 GN=Psme3 PE=1 SV=1	1.21167	0.0745173
Fabp5_K112	Fabp5	KLK*DGK	FABP5_MOUSE Fatty acid-binding protein 5 OS=Mus musculus OX=10090 GN=Fabp5 PE=1 SV=3	1.21167	0.14584
Pfdn2_K10	Pfdn2	VGK*SGGSGAGK	PFD2_MOUSE Prefoldin subunit 2 OS=Mus musculus OX=10090 GN=Pfdn2 PE=1 SV=2	1.21167	0.545171
Hsp90ab1_K577	Hsp90ab1	KVEK*VTISNR	HS90B_MOUSE Heat shock protein HSP 90-beta OS=Mus musculus OX=10090 GN=Hsp90ab1 PE=1 SV=3	1.211	0.311521
Anp32e_K65	Anp32e	LPSLNK*LR	AN32E_MOUSE Acidic leucine-rich nuclear phosphoprotein 32 family member E OS=Mus musculus OX=10090 GN=Anp32e PE=1 SV=2	1.21	0.483812
Hadha_K163	Hadha	IATK*DR	ECHA_MOUSE Trifunctional enzyme subunit alpha, mitochondrial OS=Mus musculus OX=10090 GN=Hadha PE=1 SV=1	1.21
Rps9_K30	Rps9	LDQELK*LIGEYGLR	RS9_MOUSE 40S ribosomal protein S9 OS=Mus musculus OX=10090 GN=Rps9 PE=1 SV=3	1.21
Ranbp2_K542	Ranbp2	K*ALPGTSAK	RBP2_MOUSE E3 SUMO-protein ligase RanBP2 OS=Mus musculus OX=10090 GN=Ranbp2 PE=1 SV=2	1.21
Eef1b_K73	Eef1b	ASLPGVK*K	EF1B_MOUSE Elongation factor 1-beta OS=Mus musculus OX=10090 GN=Eef1b PE=1 SV=5	1.21
Pdcd10_K164	Pdcd10	ALEHQK*K	PDC10_MOUSE Programmed cell death protein 10 OS=Mus musculus OX=10090 GN=Pdcd10 PE=1 SV=1	1.21
Rpl10_K164	Rpl10	QK*IHISK	RL10_MOUSE 60S ribosomal protein L10 OS=Mus musculus OX=10090 GN=Rpl10 PE=1 SV=3	1.21
Nop58_K415	Nop58	ALAK*AEK	NOP58_MOUSE Nucleolar protein 58 OS=Mus musculus OX=10090 GN=Nop58 PE=1 SV=1	1.21
Eef2_K438	Eef2	IMGPNYTPGK*K	EF2_MOUSE Elongation factor 2 OS=Mus musculus OX=10090 GN=Eef2 PE=1 SV=2	1.21
Lmnb1_K157	Lmnb1	DAALATALGDK*K	LMNB1_MOUSE Lamin-B1 OS=Mus musculus OX=10090 GN=Lmnb1 PE=1 SV=3	1.21
Pdia4_K227	Pdia4	SPPIPLAK*VDATEQTDLAK	PDIA4_MOUSE Protein disulfide-isomerase A4 OS=Mus musculus OX=10090 GN=Pdia4 PE=1 SV=3	1.21
Gpd1l_K284	Gpd1l	TGK*TIEELEK	GPD1L_MOUSE Glycerol-3-phosphate dehydrogenase 1-like protein OS=Mus musculus OX=10090 GN=Gpd1l PE=1 SV=2	1.21
Hectd1_K445	Hectd1	PQVAK*TLLR	HECD1_MOUSE E3 ubiquitin-protein ligase HECTD1 OS=Mus musculus OX=10090 GN=Hectd1 PE=1 SV=2	1.21
Nop2_K72	Nop2	SPGIK*TLPGELSK	NOP2_MOUSE Probable 28S rRNA (cytosine-C(5))-methyltransferase OS=Mus musculus OX=10090 GN=Nop2 PE=1 SV=1	1.21
Syncrip_K111	Syncrip	QGTK*VADSSK	HNRPQ_MOUSE Heterogeneous nuclear ribonucleoprotein Q OS=Mus musculus OX=10090 GN=Syncrip PE=1 SV=2	1.21	0.0679668
Ddx21_K474	Ddx21	STYEQVDLIGK*K	DDX21_MOUSE Nucleolar RNA helicase 2 OS=Mus musculus OX=10090 GN=Ddx21 PE=1 SV=3	1.21	0.25776
Hnrnpu_K17	Hnrnpu	VSELK*EELKK	HNRPU_MOUSE Heterogeneous nuclear ribonucleoprotein U OS=Mus musculus OX=10090 GN=Hnrnpu PE=1 SV=1	1.21	0.307176
Eif1_K109	Eif1	DDQLK*VHGF	EIF1_MOUSE Eukaryotic translation initiation factor 1 OS=Mus musculus OX=10090 GN=Eif1 PE=1 SV=2	1.21	0.307176
Hsp90b1_K404	Hsp90b1	GLFDEYGSK*K	ENPL_MOUSE Endoplasmin OS=Mus musculus OX=10090 GN=Hsp90b1 PE=1 SV=2	1.21	0.414488
Ncl_K290	Ncl	QK*EAPEAK	NUCL_MOUSE Nucleolin OS=Mus musculus OX=10090 GN=Ncl PE=1 SV=2	1.21	0.414488
Eml4_K63	Eml4	LAISEDHVASVK*K	EMAL4_MOUSE Echinoderm microtubule-associated protein-like 4 OS=Mus musculus OX=10090 GN=Eml4 PE=1 SV=1	1.21	0.610171
Hmgb2_K8	Hmgb2	GKGDPNK*PR GDPNK*PR	HMGB2_MOUSE High mobility group protein B2 OS=Mus musculus OX=10090 GN=Hmgb2 PE=1 SV=3	1.2075	0.0775867
Hspe1_K28	Hspe1	SAAETVTK*GGIMLPEK	CH10_MOUSE 10 kDa heat shock protein, mitochondrial OS=Mus musculus OX=10090 GN=Hspe1 PE=1 SV=2	1.2075	0.281994
Hnrnpa1_K298	Hnrnpa1	SSGPYGGGGQYFAK*PR	ROA1_MOUSE Heterogeneous nuclear ribonucleoprotein A1 OS=Mus musculus OX=10090 GN=Hnrnpa1 PE=1 SV=2	1.20687	0.0882599
Pgk1_K323	Pgk1	K*YAEAVGR	PGK1_MOUSE Phosphoglycerate kinase 1 OS=Mus musculus OX=10090 GN=Pgk1 PE=1 SV=4	1.20643	0.0210936
Ppib_K186	Ppib	KVESTK*TDSR	PPIB_MOUSE Peptidyl-prolyl cis-trans isomerase B OS=Mus musculus OX=10090 GN=Ppib PE=1 SV=2	1.20625	0.101502
Atp5po_K192	Atp5po	IGEK*YVDMSAK	ATPO_MOUSE ATP synthase subunit O, mitochondrial OS=Mus musculus OX=10090 GN=Atp5po PE=1 SV=1	1.20625	0.413653
Rpl24_K147	Rpl24	IVKPVK*VSAPR	RL24_MOUSE 60S ribosomal protein L24 OS=Mus musculus OX=10090 GN=Rpl24 PE=1 SV=2	1.205	0.0876899
Slc25a5_K63	Slc25a5	IPK*EQGVLSFWR	ADT2_MOUSE ADP/ATP translocase 2 OS=Mus musculus OX=10090 GN=Slc25a5 PE=1 SV=3	1.205	0.114051
Eef1a1_K392	Eef1a1	KLEDGPK*FLK	EF1A1_MOUSE Elongation factor 1-alpha 1 OS=Mus musculus OX=10090 GN=Eef1a1 PE=1 SV=3	1.205	0.157181
Rps6_K116	Rps6	K*GEKDIPGLTDTTVPR	RS6_MOUSE 40S ribosomal protein S6 OS=Mus musculus OX=10090 GN=Rps6 PE=1 SV=1	1.205	0.223277
Ldha_K81	Ldha	IVSSK*DYCVTANSK	LDHA_MOUSE L-lactate dehydrogenase A chain OS=Mus musculus OX=10090 GN=Ldha PE=1 SV=3	1.205	0.370737
Rpl23_K13	Rpl23	GGSSGAK*FR	RL23_MOUSE 60S ribosomal protein L23 OS=Mus musculus OX=10090 GN=Rpl23 PE=1 SV=1	1.205	0.695236
Lmna_K316	Lmna	QLAAK*EAK	LMNA_MOUSE Prelamin-A/C OS=Mus musculus OX=10090 GN=Lmna PE=1 SV=2	1.205	0.12231
Hmgcl_K137	Hmgcl	K*NANCSIEESFQR	HMGCL_MOUSE Hydroxymethylglutaryl-CoA lyase, mitochondrial OS=Mus musculus OX=10090 GN=Hmgcl PE=1 SV=2	1.20333	0.149075
H2az2_K8	H2az2	AGK*DSGK	H2AV_MOUSE Histone H2A.V OS=Mus musculus OX=10090 GN=H2az2 PE=1 SV=3	1.20333	0.513616
Ccdc25_K125	Ccdc25	K*VNEILNR	CCD25_MOUSE Coiled-coil domain-containing protein 25 OS=Mus musculus OX=10090 GN=Ccdc25 PE=1 SV=1	1.202	0.251123
Arcn1_K322	Arcn1	LHVENEDK*K	COPD_MOUSE Coatomer subunit delta OS=Mus musculus OX=10090 GN=Arcn1 PE=1 SV=2	1.20167	0.446205
Gapdh_K111	Gapdh	AGAHLK*GGAK	G3P_MOUSE Glyceraldehyde-3-phosphate dehydrogenase OS=Mus musculus OX=10090 GN=Gapdh PE=1 SV=2	1.20125	0.120525
Ranbp2_K2600	Ranbp2	KVCEAQK*SQNEK VCEAQK*SQNEK	RBP2_MOUSE E3 SUMO-protein ligase RanBP2 OS=Mus musculus OX=10090 GN=Ranbp2 PE=1 SV=2	1.201	0.137945
Rpl14_K184	Rpl14	APAQK*AAGQK	RL14_MOUSE 60S ribosomal protein L14 OS=Mus musculus OX=10090 GN=Rpl14 PE=1 SV=3	1.20062	0.1496
Nono_K251	Nono	NQQFHK*ER	NONO_MOUSE Non-POU domain-containing octamer-binding protein OS=Mus musculus OX=10090 GN=Nono PE=1 SV=3	1.20062	0.219562
Gcn1_K2012	Gcn1	K*ALCDPLEEVR	GCN1_MOUSE eIF-2-alpha kinase activator GCN1 OS=Mus musculus OX=10090 GN=Gcn1 PE=1 SV=1	1.2
Csde1_K295	Csde1	VDFVIPK*ELPFGDKDTK	CSDE1_MOUSE Cold shock domain-containing protein E1 OS=Mus musculus OX=10090 GN=Csde1 PE=1 SV=1	1.2
Eif4g1_K1452	Eif4g1	LLK*DGGSNQR	IF4G1_MOUSE Eukaryotic translation initiation factor 4 gamma 1 OS=Mus musculus OX=10090 GN=Eif4g1 PE=1 SV=1	1.2
Plec_K1994	Plec	LK*TEAEIALK	PLEC_MOUSE Plectin OS=Mus musculus OX=10090 GN=Plec PE=1 SV=3	1.2
Ppwd1_K626	Ppwd1	ISNVK*VNPK	PPWD1_MOUSE Peptidylprolyl isomerase domain and WD repeat-containing protein 1 OS=Mus musculus OX=10090 GN=Ppwd1 PE=1 SV=2	1.2
Myh9_K1937	Myh9	K*GTGDCSDEEVDGK	MYH9_MOUSE Myosin-9 OS=Mus musculus OX=10090 GN=Myh9 PE=1 SV=4	1.2
Fasn_K528	Fasn	SDEAVK*PLGVK	FAS_MOUSE Fatty acid synthase OS=Mus musculus OX=10090 GN=Fasn PE=1 SV=2	1.2
Rps12_K116	Rps12	DYGK*ESQAK	RS12_MOUSE 40S ribosomal protein S12 OS=Mus musculus OX=10090 GN=Rps12 PE=1 SV=2	1.2
Eif3e_K275	Eif3e	QVLK*DLVK	EIF3E_MOUSE Eukaryotic translation initiation factor 3 subunit E OS=Mus musculus OX=10090 GN=Eif3e PE=1 SV=1	1.2	0.396613
Max_K77	Max	K*NHTHQQDIDDLKR	MAX_MOUSE Protein max OS=Mus musculus OX=10090 GN=Max PE=1 SV=2	1.2	0.467879
Ampd2_K28	Ampd2	SLPGNAPCLK*HFPLDLR	AMPD2_MOUSE AMP deaminase 2 OS=Mus musculus OX=10090 GN=Ampd2 PE=1 SV=1	1.2	0.594124
Eif3h_K274	Eif3h	QQQQK*HQYQQR	EIF3H_MOUSE Eukaryotic translation initiation factor 3 subunit H OS=Mus musculus OX=10090 GN=Eif3h PE=1 SV=1	1.2	0.804305
Khsrp_K489	Khsrp	GSPQQIDHAK*QLIEEK	FUBP2_MOUSE Far upstream element-binding protein 2 OS=Mus musculus OX=10090 GN=Khsrp PE=1 SV=2	1.19875	0.332563
C1qbp_K91	C1qbp	AFVEFLTDEIKEEK*K	C1QBP_MOUSE Complement component 1 Q subcomponent-binding protein, mitochondrial OS=Mus musculus OX=10090 GN=C1qbp PE=1 SV=1	1.19875	0.373639
Msn_K388	Msn	AQSEAEK*LAK	MOES_MOUSE Moesin OS=Mus musculus OX=10090 GN=Msn PE=1 SV=3	1.19857	0.156029
Syncrip_K125	Syncrip	IK*ALLER	HNRPQ_MOUSE Heterogeneous nuclear ribonucleoprotein Q OS=Mus musculus OX=10090 GN=Syncrip PE=1 SV=2	1.19833	0.183267
Sar1a_K146	Sar1a	TDAISEEK*LR	SAR1A_MOUSE GTP-binding protein SAR1a OS=Mus musculus OX=10090 GN=Sar1a PE=1 SV=1	1.19833	0.00342839
Prdx6_K209	Prdx6	GVFTK*ELPSGK	PRDX6_MOUSE Peroxiredoxin-6 OS=Mus musculus OX=10090 GN=Prdx6 PE=1 SV=3	1.1975	0.140459
Cad_K1657	Cad	LGPGK*GEVRPELGSR	PYR1_MOUSE CAD protein OS=Mus musculus OX=10090 GN=Cad PE=1 SV=1	1.1975	0.370188
Hcls1_K109	Hcls1	SAVGHEYVADVEK*HSSQTDAAR	HCLS1_MOUSE Hematopoietic lineage cell-specific protein OS=Mus musculus OX=10090 GN=Hcls1 PE=1 SV=2	1.1975	0.401339
Vim_K439	Vim	ETNLESLPLVDTHSK*R	VIME_MOUSE Vimentin OS=Mus musculus OX=10090 GN=Vim PE=1 SV=3	1.19625	0.29558
Supt16h_K115	Supt16h	EKNESNK*SSFDK	SP16H_MOUSE FACT complex subunit SPT16 OS=Mus musculus OX=10090 GN=Supt16h PE=1 SV=2	1.196	0.33811
Npm1_K211	Npm1	SNQNGK*DLKPSTPR	NPM_MOUSE Nucleophosmin OS=Mus musculus OX=10090 GN=Npm1 PE=1 SV=1	1.195	0.163671
Hspe1_K70	Hspe1	VGDK*VLLPEYGGTK	CH10_MOUSE 10 kDa heat shock protein, mitochondrial OS=Mus musculus OX=10090 GN=Hspe1 PE=1 SV=2	1.195	0.171576
Cct5_K392	Cct5	GGNK*MIIEEAK	TCPE_MOUSE T-complex protein 1 subunit epsilon OS=Mus musculus OX=10090 GN=Cct5 PE=1 SV=1	1.195	0.339218
Erh_K90	Erh	EK*IYVLLR	ERH_MOUSE Enhancer of rudimentary homolog OS=Mus musculus OX=10090 GN=Erh PE=1 SV=1	1.195	0.361399
Rsl1d1_K392	Rsl1d1	K*ALLATETPEASAPGTSGK	RL1D1_MOUSE Ribosomal L1 domain-containing protein 1 OS=Mus musculus OX=10090 GN=Rsl1d1 PE=1 SV=1	1.195	0.694729
Mad2l1_K111	Mad2l1	TAK*EEGVR	MD2L1_MOUSE Mitotic spindle assembly checkpoint protein MAD2A OS=Mus musculus OX=10090 GN=Mad2l1 PE=1 SV=2	1.195	0.720357
Xpo1_K693	Xpo1	QLGSILK*TNVR	XPO1_MOUSE Exportin-1 OS=Mus musculus OX=10090 GN=Xpo1 PE=1 SV=1	1.195	0.113044
Serp1_K26	Serp1	GNVAK*TSR	SERP1_MOUSE Stress-associated endoplasmic reticulum protein 1 OS=Mus musculus OX=10090 GN=Serp1 PE=3 SV=1	1.195	0.515912
Hspa5_K622	Hspa5	KK*ELEEIVQPIISK	BIP_MOUSE Endoplasmic reticulum chaperone BiP OS=Mus musculus OX=10090 GN=Hspa5 PE=1 SV=3	1.19437	0.099534
Cluh_K1188	Cluh	TQLGEDHEK*TK	CLU_MOUSE Clustered mitochondria protein homolog OS=Mus musculus OX=10090 GN=Cluh PE=1 SV=2	1.194	0.521184
Tkt_K232	Tkt	AFGQAK*HQPTAIIAK	TKT_MOUSE Transketolase OS=Mus musculus OX=10090 GN=Tkt PE=1 SV=1	1.19375	0.0201528
Rps13_K78	Rps13	SK*GLAPDLPEDLYHLIK	RS13_MOUSE 40S ribosomal protein S13 OS=Mus musculus OX=10090 GN=Rps13 PE=1 SV=2	1.19375	0.176252
Tcerg1_K755	Tcerg1	ATFSEFAAK*HAK	TCRG1_MOUSE Transcription elongation regulator 1 OS=Mus musculus OX=10090 GN=Tcerg1 PE=1 SV=2	1.1925	0.530247
Nap1l1_K82	Nap1l1	VNALK*NLQVK	NP1L1_MOUSE Nucleosome assembly protein 1-like 1 OS=Mus musculus OX=10090 GN=Nap1l1 PE=1 SV=2	1.192	0.502474
Gapdh_K3	Gapdh	VK*VGVNGFGR	G3P_MOUSE Glyceraldehyde-3-phosphate dehydrogenase OS=Mus musculus OX=10090 GN=Gapdh PE=1 SV=2	1.19188	0.153906
Cct6a_K127	Cct6a	IITEGFEAAK*EK	TCPZ_MOUSE T-complex protein 1 subunit zeta OS=Mus musculus OX=10090 GN=Cct6a PE=1 SV=3	1.19188	0.130531
Eef1g_K241	Eef1g	EEK*QKPQAER	EF1G_MOUSE Elongation factor 1-gamma OS=Mus musculus OX=10090 GN=Eef1g PE=1 SV=3	1.19188	0.209121
Hmgb1_K59	Hmgb1	GK*FEDMAK	HMGB1_MOUSE High mobility group protein B1 OS=Mus musculus OX=10090 GN=Hmgb1 PE=1 SV=2	1.19125	0.381707
Esd_K200	Esd	WK*AYDATCLVK	ESTD_MOUSE S-formylglutathione hydrolase OS=Mus musculus OX=10090 GN=Esd PE=1 SV=1	1.19	0.184631
Hdgf_K80	Hdgf	K*GFSEGLWEIENNPTVK	HDGF_MOUSE Hepatoma-derived growth factor OS=Mus musculus OX=10090 GN=Hdgf PE=1 SV=2	1.19
Rhoa_K135	Rhoa	MK*QEPVKPEEGR	RHOA_MOUSE Transforming protein RhoA OS=Mus musculus OX=10090 GN=Rhoa PE=1 SV=1	1.19
Rpl14_K124	Rpl14	IIK*TEVK	RL14_MOUSE 60S ribosomal protein L14 OS=Mus musculus OX=10090 GN=Rpl14 PE=1 SV=3	1.19
Rpl7_K19	Rpl7	VATVPGTLK*K	RL7_MOUSE 60S ribosomal protein L7 OS=Mus musculus OX=10090 GN=Rpl7 PE=1 SV=2	1.19
Esf1_K794	Esf1	K*EELLIQAVER	ESF1_MOUSE ESF1 homolog OS=Mus musculus OX=10090 GN=Esf1 PE=1 SV=1	1.19
Pfkp_K736	Pfkp	K*VTDFEHR	PFKAP_MOUSE ATP-dependent 6-phosphofructokinase, platelet type OS=Mus musculus OX=10090 GN=Pfkp PE=1 SV=1	1.19
Pfdn1_K26	Pfdn1	VIDTQQK*VK	PFD1_MOUSE Prefoldin subunit 1 OS=Mus musculus OX=10090 GN=Pfdn1 PE=1 SV=1	1.19
Rars1_K143	Rars1	EIAENITK*HLPNNK	SYRC_MOUSE Arginine--tRNA ligase, cytoplasmic OS=Mus musculus OX=10090 GN=Rars1 PE=1 SV=2	1.19
Myh9_K1754	Myh9	K*ANLQIDQINTDLNLER	MYH9_MOUSE Myosin-9 OS=Mus musculus OX=10090 GN=Myh9 PE=1 SV=4	1.19
Wdr43_K75	Wdr43	LQAK*ESHQR	WDR43_MOUSE WD repeat-containing protein 43 OS=Mus musculus OX=10090 GN=Wdr43 PE=1 SV=2	1.19
Septin7_K394	Septin7	NLEAQHK*ELEEK	SEPT7_MOUSE Septin-7 OS=Mus musculus OX=10090 GN=Septin7 PE=1 SV=1	1.19
Elmo1_K503	Elmo1	PSSLDQFK*SK	ELMO1_MOUSE Engulfment and cell motility protein 1 OS=Mus musculus OX=10090 GN=Elmo1 PE=1 SV=2	1.19
Hnrnpk_K219	Hnrnpk	IILDLISESPIK*GR	HNRPK_MOUSE Heterogeneous nuclear ribonucleoprotein K OS=Mus musculus OX=10090 GN=Hnrnpk PE=1 SV=1	1.19	2.87761809723049E 18
H2bc3_K21	H2bc3	AISK*AQK ISK*AQK	H2B1B_MOUSE Histone H2B type 1-B OS=Mus musculus OX=10090 GN=H2bc3 PE=1 SV=3	1.19	0.00945105
Hsp90ab1_K428	Hsp90ab1	K*FYEAFSK	HS90B_MOUSE Heat shock protein HSP 90-beta OS=Mus musculus OX=10090 GN=Hsp90ab1 PE=1 SV=3	1.19	0.334094
Pabpc1_K279	Pabpc1	K*FEQMK	PABP1_MOUSE Polyadenylate-binding protein 1 OS=Mus musculus OX=10090 GN=Pabpc1 PE=1 SV=2	1.19	0.40427
Hnrnpa3_K148	Hnrnpa3	DYFEK*YGK	ROA3_MOUSE Heterogeneous nuclear ribonucleoprotein A3 OS=Mus musculus OX=10090 GN=Hnrnpa3 PE=1 SV=1	1.19	0.58628
Ptpn6_K570	Ptpn6	HKEEVYENVHSK*SK	PTN6_MOUSE Tyrosine-protein phosphatase non-receptor type 6 OS=Mus musculus OX=10090 GN=Ptpn6 PE=1 SV=2	1.19	0.750636
Slc25a4_K147	Slc25a4	LAADVGK*GSSQR	ADT1_MOUSE ADP/ATP translocase 1 OS=Mus musculus OX=10090 GN=Slc25a4 PE=1 SV=4	1.18937	0.219106
Mbd3_K109	Mbd3	QTASIFK*QPVTK	MBD3_MOUSE Methyl-CpG-binding domain protein 3 OS=Mus musculus OX=10090 GN=Mbd3 PE=1 SV=1	1.18875	0.0250111
Matr3_K588	Matr3	GIDLLK*K	MATR3_MOUSE Matrin-3 OS=Mus musculus OX=10090 GN=Matr3 PE=1 SV=1	1.18833	0.464034
Cacybp_K43	Cacybp	SKIETELK*NK	CYBP_MOUSE Calcyclin-binding protein OS=Mus musculus OX=10090 GN=Cacybp PE=1 SV=1	1.18833	0.56297
Pdcd6ip_K494	Pdcd6ip	AEGAK*FR	PDC6I_MOUSE Programmed cell death 6-interacting protein OS=Mus musculus OX=10090 GN=Pdcd6ip PE=1 SV=3	1.18813	0.189908
Eef1g_K401	Eef1g	K*LDPGSEETQTLVR	EF1G_MOUSE Elongation factor 1-gamma OS=Mus musculus OX=10090 GN=Eef1g PE=1 SV=3	1.1875	0.0759946
Myh9_K1219	Myh9	AK*QTLENER	MYH9_MOUSE Myosin-9 OS=Mus musculus OX=10090 GN=Myh9 PE=1 SV=4	1.1875	0.117547
Psmd7_K199	Psmd7	ITNQVHGLK*GLNSK	PSMD7_MOUSE 26S proteasome non-ATPase regulatory subunit 7 OS=Mus musculus OX=10090 GN=Psmd7 PE=1 SV=2	1.18714	0.271744
Mybbp1a_K1288	Mybbp1a	K*HHQEALSTK	MBB1A_MOUSE Myb-binding protein 1A OS=Mus musculus OX=10090 GN=Mybbp1a PE=1 SV=2	1.187	0.526685
Tln1_K687	Tln1	AK*SVAQR	TLN1_MOUSE Talin-1 OS=Mus musculus OX=10090 GN=Tln1 PE=1 SV=2	1.18667	0.0257779
Kifc1_K20	Kifc1	NVELK*AALVK	KIFC1_MOUSE Kinesin-like protein KIFC1 OS=Mus musculus OX=10090 GN=Kifc1 PE=1 SV=2	1.18667	0.457052
Vim_K313	Vim	QAK*QESNEYR	VIME_MOUSE Vimentin OS=Mus musculus OX=10090 GN=Vim PE=1 SV=3	1.18667	0.189171
Hsp90aa1_K500	Hsp90aa1	HIYFITGETK*DQVANSAFVER	HS90A_MOUSE Heat shock protein HSP 90-alpha OS=Mus musculus OX=10090 GN=Hsp90aa1 PE=1 SV=4	1.18667	0.302069
Rpl12_K40	Rpl12	IGPLGLSPK*K	RL12_MOUSE 60S ribosomal protein L12 OS=Mus musculus OX=10090 GN=Rpl12 PE=1 SV=2	1.18643	0.189285
Ccar2_K54	Ccar2	HLQSGEK*QR	CCAR2_MOUSE Cell cycle and apoptosis regulator protein 2 OS=Mus musculus OX=10090 GN=Ccar2 PE=1 SV=2	1.186	0.6245
Set_K82	Set	QPFFQK*R	SET_MOUSE Protein SET OS=Mus musculus OX=10090 GN=Set PE=1 SV=1	1.18562	0.220479
Trip12_K327	Trip12	QK*TTGSCASTSR	TRIPC_MOUSE E3 ubiquitin-protein ligase TRIP12 OS=Mus musculus OX=10090 GN=Trip12 PE=1 SV=1	1.185
Dars1_K451	Dars1	ALHHGIDLEK*IK	SYDC_MOUSE Aspartate--tRNA ligase, cytoplasmic OS=Mus musculus OX=10090 GN=Dars1 PE=1 SV=2	1.185	0.331097
Pitpna_K216	Pitpna	VENFIHK*QEK	PIPNA_MOUSE Phosphatidylinositol transfer protein alpha isoform OS=Mus musculus OX=10090 GN=Pitpna PE=1 SV=2	1.185	0.516749
Rpl7_K21	Rpl7	K*VPAGPK	RL7_MOUSE 60S ribosomal protein L7 OS=Mus musculus OX=10090 GN=Rpl7 PE=1 SV=2	1.185	0.784317
Gmip_K503	Gmip	GPAK*CR	GMIP_MOUSE GEM-interacting protein OS=Mus musculus OX=10090 GN=Gmip PE=1 SV=1	1.18429	0.252345
Dync1h1_K2284	Dync1h1	K*IIDNVR	DYHC1_MOUSE Cytoplasmic dynein 1 heavy chain 1 OS=Mus musculus OX=10090 GN=Dync1h1 PE=1 SV=2	1.184	0.287454
Rpl29_K151	Rpl29	GAQAPK*GAQAPVK	RL29_MOUSE 60S ribosomal protein L29 OS=Mus musculus OX=10090 GN=Rpl29 PE=1 SV=2	1.18333	0.163426
Rpl19_K186	Rpl19	KEEIIK*TLSK	RL19_MOUSE 60S ribosomal protein L19 OS=Mus musculus OX=10090 GN=Rpl19 PE=1 SV=1	1.18333	0.697386
Rps27a_K11	Rps27a	TLTGK*TITLEVEPSDTIENVK	RS27A_MOUSE Ubiquitin-40S ribosomal protein S27a OS=Mus musculus OX=10090 GN=Rps27a PE=1 SV=2	1.18333	0.23281
Rps19_K143	Rps19	IAGQVAAANK*K	RS19_MOUSE 40S ribosomal protein S19 OS=Mus musculus OX=10090 GN=Rps19 PE=1 SV=3	1.18312	0.219602
Sltm_K625	Sltm	LK*QAVEFR	SLTM_MOUSE SAFB-like transcription modulator OS=Mus musculus OX=10090 GN=Sltm PE=1 SV=1	1.182	0.635877
Atp5pd_K85	Atp5pd	IPVPEDK*YTALVDQEEKEDVK	ATP5H_MOUSE ATP synthase subunit d, mitochondrial OS=Mus musculus OX=10090 GN=Atp5pd PE=1 SV=3	1.18143	0.327746
Hspa5_K345	Hspa5	STMKPVQK*VLEDSDLK	BIP_MOUSE Endoplasmic reticulum chaperone BiP OS=Mus musculus OX=10090 GN=Hspa5 PE=1 SV=3	1.18	0.295165
Tor1aip1_K470	Tor1aip1	AAQDSDLVK*HEVDQELTDGFK	TOIP1_MOUSE Torsin-1A-interacting protein 1 OS=Mus musculus OX=10090 GN=Tor1aip1 PE=1 SV=3	1.18	0.5
Rpl4_K408	Rpl4	KPAEK*KPTTEEK	RL4_MOUSE 60S ribosomal protein L4 OS=Mus musculus OX=10090 GN=Rpl4 PE=1 SV=3	1.18
Tmpo_K206	Tmpo	AK*TPVTLK	LAP2B_MOUSE Lamina-associated polypeptide 2, isoforms beta/delta/epsilon/gamma OS=Mus musculus OX=10090 GN=Tmpo PE=1 SV=4	1.18
Stk38_K72	Stk38	K*ETEFLR	STK38_MOUSE Serine/threonine-protein kinase 38 OS=Mus musculus OX=10090 GN=Stk38 PE=1 SV=1	1.18
Ap1g1_K214	Ap1g1	K*LVPQLVR	AP1G1_MOUSE AP-1 complex subunit gamma-1 OS=Mus musculus OX=10090 GN=Ap1g1 PE=1 SV=3	1.18
Rplp2_K94	Rplp2	LASVPAGGAVAVSAAPGSAAPAAGSAPAAAEEK*KDEK	RLA2_MOUSE 60S acidic ribosomal protein P2 OS=Mus musculus OX=10090 GN=Rplp2 PE=1 SV=3	1.18
Dnttip2_K425	Dnttip2	SSQSGVPLECDTK*PCK	TDIF2_MOUSE Deoxynucleotidyltransferase terminal-interacting protein 2 OS=Mus musculus OX=10090 GN=Dnttip2 PE=1 SV=1	1.18
Ankar_K965	Ankar	ELTK*DLLK	ANKAR_MOUSE Ankyrin and armadillo repeat-containing protein OS=Mus musculus OX=10090 GN=Ankar PE=2 SV=1	1.18
Ints3_K697	Ints3	ASK*AAAGK	INT3_MOUSE Integrator complex subunit 3 OS=Mus musculus OX=10090 GN=Ints3 PE=1 SV=2	1.18
Psma3_K65	Psma3	LYEEGSNK*R	PSA3_MOUSE Proteasome subunit alpha type-3 OS=Mus musculus OX=10090 GN=Psma3 PE=1 SV=3	1.18
Hnrnpu_K328	Hnrnpu	HLYTK*DIDIHEVR	HNRPU_MOUSE Heterogeneous nuclear ribonucleoprotein U OS=Mus musculus OX=10090 GN=Hnrnpu PE=1 SV=1	1.18
Acsl4_K89	Acsl4	LFDHAVAK*FGK	ACSL4_MOUSE Long-chain-fatty-acid--CoA ligase 4 OS=Mus musculus OX=10090 GN=Acsl4 PE=1 SV=2	1.18	0.0276109
Lig1_K208	Lig1	AGVK*LKPQEEEQSKPPAR	DNLI1_MOUSE DNA ligase 1 OS=Mus musculus OX=10090 GN=Lig1 PE=1 SV=2	1.18	0.130713
Myh9_K545	Myh9	SFVEK*VVQEQGTHPK	MYH9_MOUSE Myosin-9 OS=Mus musculus OX=10090 GN=Myh9 PE=1 SV=4	1.18	0.342148
Ddx54_K124	Ddx54	K*TIPVILDGK	DDX54_MOUSE ATP-dependent RNA helicase DDX54 OS=Mus musculus OX=10090 GN=Ddx54 PE=1 SV=1	1.18	0.580449
Serbp1_K39	Serbp1	KK*EAGGGGVGGPGAK	PAIRB_MOUSE Plasminogen activator inhibitor 1 RNA-binding protein OS=Mus musculus OX=10090 GN=Serbp1 PE=1 SV=2	1.18	0.697599
Rpl18_K97	Rpl18	ILEVPK*LK	RL18_MOUSE 60S ribosomal protein L18 OS=Mus musculus OX=10090 GN=Rpl18 PE=1 SV=3	1.18	0.791571
Hspa8_K512	Hspa8	LSK*EDIER	HSP7C_MOUSE Heat shock cognate 71 kDa protein OS=Mus musculus OX=10090 GN=Hspa8 PE=1 SV=1	1.17938	0.297454
Hspa4_K772	Hspa4	EIEAK*IK	HSP74_MOUSE Heat shock 70 kDa protein 4 OS=Mus musculus OX=10090 GN=Hspa4 PE=1 SV=1	1.17857	0.389395
Trim25_K225	Trim25	SK*QQCVQDSMK	TRI25_MOUSE E3 ubiquitin/ISG15 ligase TRIM25 OS=Mus musculus OX=10090 GN=Trim25 PE=1 SV=2	1.17833	0.117994
Hsp90b1_K161	Hsp90b1	EELVK*NLGTIAK	ENPL_MOUSE Endoplasmin OS=Mus musculus OX=10090 GN=Hsp90b1 PE=1 SV=2	1.17833	0.479693
Hnrnpu_K31	Hnrnpu	GLK*ADLMDR	HNRPU_MOUSE Heterogeneous nuclear ribonucleoprotein U OS=Mus musculus OX=10090 GN=Hnrnpu PE=1 SV=1	1.1775	0.229985
Msh6_K1313	Msh6	LANLPEEVIQK*GHR	MSH6_MOUSE DNA mismatch repair protein Msh6 OS=Mus musculus OX=10090 GN=Msh6 PE=1 SV=3	1.177	0.549354
Tpi1_K188	Tpi1	TATPQQAQEVHEK*LR	TPIS_MOUSE Triosephosphate isomerase OS=Mus musculus OX=10090 GN=Tpi1 PE=1 SV=5	1.17687	0.238764
Hspa5_K517	Hspa5	VTAEDK*GTGNK	BIP_MOUSE Endoplasmic reticulum chaperone BiP OS=Mus musculus OX=10090 GN=Hspa5 PE=1 SV=3	1.17667	0.324663
Rpl12_K41	Rpl12	K*VGDDIAK	RL12_MOUSE 60S ribosomal protein L12 OS=Mus musculus OX=10090 GN=Rpl12 PE=1 SV=2	1.17667	0.408863
Ncl_K55	Ncl	K*ATTTPAK	NUCL_MOUSE Nucleolin OS=Mus musculus OX=10090 GN=Ncl PE=1 SV=2	1.17625	0.127278
Rpl6_K79	Rpl6	K*YSAAK	RL6_MOUSE 60S ribosomal protein L6 OS=Mus musculus OX=10090 GN=Rpl6 PE=1 SV=3	1.17583	0.156037
Eef1b_K129	Eef1b	LAQYESK*K	EF1B_MOUSE Elongation factor 1-beta OS=Mus musculus OX=10090 GN=Eef1b PE=1 SV=5	1.175	0.268065
Hnrnpc_K176	Hnrnpc	SGFNSK*SGQR	HNRPC_MOUSE Heterogeneous nuclear ribonucleoproteins C1/C2 OS=Mus musculus OX=10090 GN=Hnrnpc PE=1 SV=1	1.175	0.617102
Hspa5_K341	Hspa5	STMK*PVQK	BIP_MOUSE Endoplasmic reticulum chaperone BiP OS=Mus musculus OX=10090 GN=Hspa5 PE=1 SV=3	1.175	0.701153
Ktn1_K1092	Ktn1	ACVAGTSDAEAVK*VLEHR	KTN1_MOUSE Kinectin OS=Mus musculus OX=10090 GN=Ktn1 PE=1 SV=1	1.175	0.360264
H2ac12_K37	H2ac12	K*GNYSER	H2A1H_MOUSE Histone H2A type 1-H OS=Mus musculus OX=10090 GN=H2ac12 PE=1 SV=3	1.17438	0.158456
Dnajc7_K306	Dnajc7	GTVNSK*LR	DNJC7_MOUSE DnaJ homolog subfamily C member 7 OS=Mus musculus OX=10090 GN=Dnajc7 PE=1 SV=2	1.17417	0.291621
Zranb2_K59	Zranb2	TLAEK*SR	ZRAB2_MOUSE Zinc finger Ran-binding domain-containing protein 2 OS=Mus musculus OX=10090 GN=Zranb2 PE=1 SV=2	1.17375	0.229194
Hcls1_K123	Hcls1	GFGGK*YGVER	HCLS1_MOUSE Hematopoietic lineage cell-specific protein OS=Mus musculus OX=10090 GN=Hcls1 PE=1 SV=2	1.17333	0.204405
Pkm_K186	Pkm	IYVDDGLISLQVK*EK	KPYM_MOUSE Pyruvate kinase PKM OS=Mus musculus OX=10090 GN=Pkm PE=1 SV=4	1.17333	0.382264
Hspa9_K288	Hspa9	HIVK*EFK	GRP75_MOUSE Stress-70 protein, mitochondrial OS=Mus musculus OX=10090 GN=Hspa9 PE=1 SV=3	1.17333	0.325852
Bcap31_K203	Bcap31	KLEK*AENEALAMQK	BAP31_MOUSE B-cell receptor-associated protein 31 OS=Mus musculus OX=10090 GN=Bcap31 PE=1 SV=4	1.17333	0.474345
Impdh2_K438	Impdh2	IK*VAQGVSGAVQDK	IMDH2_MOUSE Inosine-5'-monophosphate dehydrogenase 2 OS=Mus musculus OX=10090 GN=Impdh2 PE=1 SV=2	1.17333	0.535418
Rpl7_K10	Rpl7	K*VATVPGTLK	RL7_MOUSE 60S ribosomal protein L7 OS=Mus musculus OX=10090 GN=Rpl7 PE=1 SV=2	1.1725	0.23461
Ncf4_K317	Ncf4	GLPSQK*R	NCF4_MOUSE Neutrophil cytosol factor 4 OS=Mus musculus OX=10090 GN=Ncf4 PE=1 SV=2	1.1725	0.34132
Atp5if1_K64	Atp5if1	TK*EQLAALR	ATIF1_MOUSE ATPase inhibitor, mitochondrial OS=Mus musculus OX=10090 GN=Atp5if1 PE=1 SV=2	1.17188	0.229298
Ptges3_K33	Ptges3	DVNVNFEK*SK	TEBP_MOUSE Prostaglandin E synthase 3 OS=Mus musculus OX=10090 GN=Ptges3 PE=1 SV=1	1.17143	0.154011
Lmna_K171	Lmna	GQVAK*LEAALGEAK	LMNA_MOUSE Prelamin-A/C OS=Mus musculus OX=10090 GN=Lmna PE=1 SV=2	1.17125	0.0799578
Prdx1_K185	Prdx1	HGEVCPAGWKPGSDTIK*PDVNK	PRDX1_MOUSE Peroxiredoxin-1 OS=Mus musculus OX=10090 GN=Prdx1 PE=1 SV=1	1.171	0.148371
Gapdh_K192	Gapdh	TVDGPSGK*LWR	G3P_MOUSE Glyceraldehyde-3-phosphate dehydrogenase OS=Mus musculus OX=10090 GN=Gapdh PE=1 SV=2	1.17	0.202123
Rps3a_K56	Rps3a	TQGTK*IASDGLK	RS3A_MOUSE 40S ribosomal protein S3a OS=Mus musculus OX=10090 GN=Rps3a PE=1 SV=3	1.17	0.508227
Hk1_K648	Hk1	GLK*GPR	HXK1_MOUSE Hexokinase-1 OS=Mus musculus OX=10090 GN=Hk1 PE=1 SV=3	1.17
Hsp90ab1_K477	Hsp90ab1	MK*ETQK	HS90B_MOUSE Heat shock protein HSP 90-beta OS=Mus musculus OX=10090 GN=Hsp90ab1 PE=1 SV=3	1.17
Hspa4_K767	Hspa4	TK*EIEAK	HSP74_MOUSE Heat shock 70 kDa protein 4 OS=Mus musculus OX=10090 GN=Hspa4 PE=1 SV=1	1.17
Hcls1_K70	Hcls1	K*KELESGPK	HCLS1_MOUSE Hematopoietic lineage cell-specific protein OS=Mus musculus OX=10090 GN=Hcls1 PE=1 SV=2	1.17
Ipo7_K1009	Ipo7	AAHESK*MIEK	IPO7_MOUSE Importin-7 OS=Mus musculus OX=10090 GN=Ipo7 PE=1 SV=2	1.17
Erh_K41	Erh	MYEEHLK*R	ERH_MOUSE Enhancer of rudimentary homolog OS=Mus musculus OX=10090 GN=Erh PE=1 SV=1	1.17
Srpra_K219	Srpra	EEFIQK*HGK	SRPRA_MOUSE Signal recognition particle receptor subunit alpha OS=Mus musculus OX=10090 GN=Srpra PE=1 SV=1	1.17
Cdc37_K155	Cdc37	TFVEK*YEK	CDC37_MOUSE Hsp90 co-chaperone Cdc37 OS=Mus musculus OX=10090 GN=Cdc37 PE=1 SV=1	1.17
Hnrnpf_K347	Hnrnpf	VTGEADVEFATHEEAVAAMSK*DR	HNRPF_MOUSE Heterogeneous nuclear ribonucleoprotein F OS=Mus musculus OX=10090 GN=Hnrnpf PE=1 SV=3	1.17
Washc2_K740	Washc2	PEDLK*VDNAR	WASC2_MOUSE WASH complex subunit 2 OS=Mus musculus OX=10090 GN=Washc2 PE=1 SV=1	1.17
Hnrnpl_K535	Hnrnpl	VFSGK*SER	HNRPL_MOUSE Heterogeneous nuclear ribonucleoprotein L OS=Mus musculus OX=10090 GN=Hnrnpl PE=1 SV=2	1.17
Cep55_K340	Cep55	ILYDSLLK*HQEEQAR	CEP55_MOUSE Centrosomal protein of 55 kDa OS=Mus musculus OX=10090 GN=Cep55 PE=1 SV=2	1.17
Dbi_K55	Dbi	AK*WDSWNK	ACBP_MOUSE Acyl-CoA-binding protein OS=Mus musculus OX=10090 GN=Dbi PE=1 SV=2	1.17
Rpl10_K208	Rpl10	GPLDK*WR	RL10_MOUSE 60S ribosomal protein L10 OS=Mus musculus OX=10090 GN=Rpl10 PE=1 SV=3	1.17	0.0745082
Myh9_K682	Myh9	AGK*LDPHLVLDQLR	MYH9_MOUSE Myosin-9 OS=Mus musculus OX=10090 GN=Myh9 PE=1 SV=4	1.17	0.147103
Hsph1_K351	Hsph1	IPAVK*ER	HS105_MOUSE Heat shock protein 105 kDa OS=Mus musculus OX=10090 GN=Hsph1 PE=1 SV=2	1.17	0.148402
Noc2l_K577	Noc2l	QLLEK*VQENAR	NOC2L_MOUSE Nucleolar complex protein 2 homolog OS=Mus musculus OX=10090 GN=Noc2l PE=1 SV=2	1.17	0.215994
Cap1_K311	Cap1	PQTSPSPK*PATK	CAP1_MOUSE Adenylyl cyclase-associated protein 1 OS=Mus musculus OX=10090 GN=Cap1 PE=1 SV=4	1.17	0.219719
Ldha_K318	Ldha	K*SADTLWGIQK	LDHA_MOUSE L-lactate dehydrogenase A chain OS=Mus musculus OX=10090 GN=Ldha PE=1 SV=3	1.17	0.222848
Niban1_K474	Niban1	IPVAIEK*VK	NIBA1_MOUSE Protein Niban 1 OS=Mus musculus OX=10090 GN=Niban1 PE=1 SV=2	1.17	0.295763
Map4_K919	Map4	VGSTENIK*HQPGGGR	MAP4_MOUSE Microtubule-associated protein 4 OS=Mus musculus OX=10090 GN=Map4 PE=1 SV=3	1.17	0.391306
Rpl14_K195	Rpl14	AAPPAK*GQK	RL14_MOUSE 60S ribosomal protein L14 OS=Mus musculus OX=10090 GN=Rpl14 PE=1 SV=3	1.17	0.391306
Rpl13_K145	Rpl13	KGDSSAEELK*LATQLTGPVMPIR	RL13_MOUSE 60S ribosomal protein L13 OS=Mus musculus OX=10090 GN=Rpl13 PE=1 SV=3	1.17	0.551505
Stip1_K530	Stip1	NPVIAQK*IQK	STIP1_MOUSE Stress-induced-phosphoprotein 1 OS=Mus musculus OX=10090 GN=Stip1 PE=1 SV=1	1.16938	0.0772158
Cap1_K278	Cap1	HVSDDMK*THK	CAP1_MOUSE Adenylyl cyclase-associated protein 1 OS=Mus musculus OX=10090 GN=Cap1 PE=1 SV=4	1.16917	0.0665837
Cct2_K272	Cct2	VAEIEHAEK*EK	TCPB_MOUSE T-complex protein 1 subunit beta OS=Mus musculus OX=10090 GN=Cct2 PE=1 SV=4	1.16875	0.125899
Mtx1_K159	Mtx1	LQLLCGEHK*SENEEELEK	MTX1_MOUSE Metaxin-1 OS=Mus musculus OX=10090 GN=Mtx1 PE=1 SV=1	1.16857	0.416944
Hspa8_K500	Hspa8	ENK*ITITNDK	HSP7C_MOUSE Heat shock cognate 71 kDa protein OS=Mus musculus OX=10090 GN=Hspa8 PE=1 SV=1	1.1675	0.164583
Nedd8_K48	Nedd8	LIYSGK*QMNDEK	NEDD8_MOUSE NEDD8 OS=Mus musculus OX=10090 GN=Nedd8 PE=1 SV=2	1.1675	0.557908
Ncl_K109	Ncl	VIPTPGK*K	NUCL_MOUSE Nucleolin OS=Mus musculus OX=10090 GN=Ncl PE=1 SV=2	1.16714	0.045444
Ide_K854	Ide	FIIQSEK*PPHYLESR	IDE_MOUSE Insulin-degrading enzyme OS=Mus musculus OX=10090 GN=Ide PE=1 SV=1	1.16667	0.31065
Rps20_K8	Rps20	DTGK*TPVEPEVAIHR	RS20_MOUSE 40S ribosomal protein S20 OS=Mus musculus OX=10090 GN=Rps20 PE=1 SV=1	1.16667	0.59991
Nono_K338	Nono	MEELHNQEVQK*R	NONO_MOUSE Non-POU domain-containing octamer-binding protein OS=Mus musculus OX=10090 GN=Nono PE=1 SV=3	1.166	0.412882
Rpl14_K167	Rpl14	K*ATGPGK	RL14_MOUSE 60S ribosomal protein L14 OS=Mus musculus OX=10090 GN=Rpl14 PE=1 SV=3	1.16583	0.0460046
Cfl1_K22	Cfl1	K*SSTPEEVKK K*SSTPEEVK	COF1_MOUSE Cofilin-1 OS=Mus musculus OX=10090 GN=Cfl1 PE=1 SV=3	1.16571	0.0649729
Prdx1_K67	Prdx1	ADEFK*K	PRDX1_MOUSE Peroxiredoxin-1 OS=Mus musculus OX=10090 GN=Prdx1 PE=1 SV=1	1.16571	0.14067
Tkt_K281	Tkt	NMAEQIIQEIYSQVQSK*K	TKT_MOUSE Transketolase OS=Mus musculus OX=10090 GN=Tkt PE=1 SV=1	1.165
Pdia3_K173	Pdia3	DLFSDGHSEFLK*AASNLR	PDIA3_MOUSE Protein disulfide-isomerase A3 OS=Mus musculus OX=10090 GN=Pdia3 PE=1 SV=2	1.165	0.387503
Znf207_K31	Znf207	ILIQHQK*AK	ZN207_MOUSE BUB3-interacting and GLEBS motif-containing protein ZNF207 OS=Mus musculus OX=10090 GN=Znf207 PE=1 SV=1	1.165	0.427879
Ttc9c_K99	Ttc9c	EYSQK*VLER	TTC9C_MOUSE Tetratricopeptide repeat protein 9C OS=Mus musculus OX=10090 GN=Ttc9c PE=1 SV=1	1.165	0.5
Lmna_K201	Lmna	LQTLK*EELDFQK	LMNA_MOUSE Prelamin-A/C OS=Mus musculus OX=10090 GN=Lmna PE=1 SV=2	1.165	0.518718
Ncl_K116	Ncl	GAAQAK*ALVPTPGK	NUCL_MOUSE Nucleolin OS=Mus musculus OX=10090 GN=Ncl PE=1 SV=2	1.16437	0.0823481
Gapdh_K213	Gapdh	GAAQNIIPASTGAAK*AVGK	G3P_MOUSE Glyceraldehyde-3-phosphate dehydrogenase OS=Mus musculus OX=10090 GN=Gapdh PE=1 SV=2	1.16437	0.225895
Lmna_K270	Lmna	TYSAK*LDNAR	LMNA_MOUSE Prelamin-A/C OS=Mus musculus OX=10090 GN=Lmna PE=1 SV=2	1.16375	0.202776
Gspt1_K384	Gspt1	K*VGFNPK	ERF3A_MOUSE Eukaryotic peptide chain release factor GTP-binding subunit ERF3A OS=Mus musculus OX=10090 GN=Gspt1 PE=1 SV=2	1.16375	0.236759
Glrx3_K236	Glrx3	APK*LEER	GLRX3_MOUSE Glutaredoxin-3 OS=Mus musculus OX=10090 GN=Glrx3 PE=1 SV=1	1.16375	0.0617801
Atp5f1b_K133	Atp5f1b	VLDSGAPIK*IPVGPETLGR	ATPB_MOUSE ATP synthase subunit beta, mitochondrial OS=Mus musculus OX=10090 GN=Atp5f1b PE=1 SV=2	1.16333	0.0595975
Mrpl12_K145	Mrpl12	LTEAKPVDK*VK	RM12_MOUSE 39S ribosomal protein L12, mitochondrial OS=Mus musculus OX=10090 GN=Mrpl12 PE=1 SV=2	1.16333	0.432492
S100a13_K85	S100a13	LIGELAK*EVR	S10AD_MOUSE Protein S100-A13 OS=Mus musculus OX=10090 GN=S100a13 PE=1 SV=1	1.16333	0.637514
Nup98_K1039	Nup98	LPISASHSSK*SR	NUP98_MOUSE Nuclear pore complex protein Nup98-Nup96 OS=Mus musculus OX=10090 GN=Nup98 PE=1 SV=2	1.163	0.560086
Eef1a1_K219	Eef1a1	K*DGSASGTTLLEALDCILPPTRPTDKPLR K*DGSASGTTLLEALDCILPPTRPTDK	EF1A1_MOUSE Elongation factor 1-alpha 1 OS=Mus musculus OX=10090 GN=Eef1a1 PE=1 SV=3	1.1625	0.08201
Prmt1_K145	Prmt1	GK*VEEVELPVEK	ANM1_MOUSE Protein arginine N-methyltransferase 1 OS=Mus musculus OX=10090 GN=Prmt1 PE=1 SV=1	1.1625	0.267154
Eef2_K605	Eef2	LYMK*AR	EF2_MOUSE Elongation factor 2 OS=Mus musculus OX=10090 GN=Eef2 PE=1 SV=2	1.1625	0.545396
Atp5pd_K63	Atp5pd	ANVAK*PGLVDDFEK	ATP5H_MOUSE ATP synthase subunit d, mitochondrial OS=Mus musculus OX=10090 GN=Atp5pd PE=1 SV=3	1.162	0.48277
Msn_K400	Msn	QEAEEAK*EALLQASR	MOES_MOUSE Moesin OS=Mus musculus OX=10090 GN=Msn PE=1 SV=3	1.16167	0.439699
Eef2_K275	Eef2	FSK*SANSPDGK	EF2_MOUSE Elongation factor 2 OS=Mus musculus OX=10090 GN=Eef2 PE=1 SV=2	1.16125	0.126962
Ppia_K82	Ppia	SIYGEK*FEDENFILK	PPIA_MOUSE Peptidyl-prolyl cis-trans isomerase A OS=Mus musculus OX=10090 GN=Ppia PE=1 SV=2	1.161	0.479067
Pfkp_K687	Pfkp	NFGTK*ISAK	PFKAP_MOUSE ATP-dependent 6-phosphofructokinase, platelet type OS=Mus musculus OX=10090 GN=Pfkp PE=1 SV=1	1.16083	0.097172
Sgta_K206	Sgta	IAELK*LR	SGTA_MOUSE Small glutamine-rich tetratricopeptide repeat-containing protein alpha OS=Mus musculus OX=10090 GN=Sgta PE=1 SV=2	1.16083	0.231871
Vasp_K272	Vasp	K*ATQVGEKPPKDESASEESEAR	VASP_MOUSE Vasodilator-stimulated phosphoprotein OS=Mus musculus OX=10090 GN=Vasp PE=1 SV=4	1.16	0.326195
Idh3a_K339	Idh3a	DGK*SLTK	IDH3A_MOUSE Isocitrate dehydrogenase [NAD] subunit alpha, mitochondrial OS=Mus musculus OX=10090 GN=Idh3a PE=1 SV=1	1.16	0.326195
Rps10_K107	Rps10	PK*GPEGERPAR	RS10_MOUSE 40S ribosomal protein S10 OS=Mus musculus OX=10090 GN=Rps10 PE=1 SV=1	1.16	0.434376
Eif3c_K99	Eif3c	SIVDK*EGVPR	EIF3C_MOUSE Eukaryotic translation initiation factor 3 subunit C OS=Mus musculus OX=10090 GN=Eif3c PE=1 SV=1	1.16	0.554434
Pfn1_K126	Pfn1	EGVHGGLINK*K	PROF1_MOUSE Profilin-1 OS=Mus musculus OX=10090 GN=Pfn1 PE=1 SV=2	1.16	0.573737
Hspa5_K214	Hspa5	IINEPTAAAIAYGLDK*R	BIP_MOUSE Endoplasmic reticulum chaperone BiP OS=Mus musculus OX=10090 GN=Hspa5 PE=1 SV=3	1.16	0.727031
Cltc_K83	Cltc	VIALK*AGK	CLH1_MOUSE Clathrin heavy chain 1 OS=Mus musculus OX=10090 GN=Cltc PE=1 SV=3	1.16
Exosc3_K208	Exosc3	K*LLAPDCEIVQELGK	EXOS3_MOUSE Exosome complex component RRP40 OS=Mus musculus OX=10090 GN=Exosc3 PE=1 SV=3	1.16
Spcs2_K71	Spcs2	VLLEK*YK	SPCS2_MOUSE Signal peptidase complex subunit 2 OS=Mus musculus OX=10090 GN=Spcs2 PE=1 SV=1	1.16
Slc39a7_K279	Slc39a7	HECSSK*EKPSTEEEKEVGGLR	S39A7_MOUSE Zinc transporter SLC39A7 OS=Mus musculus OX=10090 GN=Slc39a7 PE=1 SV=2	1.16
Stmn1_K104	Stmn1	LTHK*MEANK	STMN1_MOUSE Stathmin OS=Mus musculus OX=10090 GN=Stmn1 PE=1 SV=2	1.16
Ppid_K64	Ppid	GTGSTTGK*PLHFK	PPID_MOUSE Peptidyl-prolyl cis-trans isomerase D OS=Mus musculus OX=10090 GN=Ppid PE=1 SV=3	1.16
Jph2_K647	Jph2	GLSK*AGAK	JPH2_MOUSE Junctophilin-2 OS=Mus musculus OX=10090 GN=Jph2 PE=1 SV=2	1.16
Supt16h_K504	Supt16h	GEQQIQK*AR	SP16H_MOUSE FACT complex subunit SPT16 OS=Mus musculus OX=10090 GN=Supt16h PE=1 SV=2	1.16
Myh9_K403	Myh9	DYVQK*AQTK	MYH9_MOUSE Myosin-9 OS=Mus musculus OX=10090 GN=Myh9 PE=1 SV=4	1.16
Cep135_K348	Cep135	ELGEAK*K	CP135_MOUSE Centrosomal protein of 135 kDa OS=Mus musculus OX=10090 GN=Cep135 PE=1 SV=1	1.16
Prep_K64	Prep	GLYK*ER	PPCE_MOUSE Prolyl endopeptidase OS=Mus musculus OX=10090 GN=Prep PE=1 SV=1	1.16
Gapdh_K258	Gapdh	K*VVKQASEGPLK	G3P_MOUSE Glyceraldehyde-3-phosphate dehydrogenase OS=Mus musculus OX=10090 GN=Gapdh PE=1 SV=2	1.16
Uba1_K593	Uba1	K*PLLESGTLGTK	UBA1_MOUSE Ubiquitin-like modifier-activating enzyme 1 OS=Mus musculus OX=10090 GN=Uba1 PE=1 SV=1	1.16
Fdps_K76	Fdps	K*QDAESLQR	FPPS_MOUSE Farnesyl pyrophosphate synthase OS=Mus musculus OX=10090 GN=Fdps PE=1 SV=1	1.16	0.0396048
Mtpn_K90	Mtpn	LLLSK*GADK	MTPN_MOUSE Myotrophin OS=Mus musculus OX=10090 GN=Mtpn PE=1 SV=2	1.16	0.117973
Tpm3_K153	Tpm3	EAK*HIAEEADR	TPM3_MOUSE Tropomyosin alpha-3 chain OS=Mus musculus OX=10090 GN=Tpm3 PE=1 SV=3	1.16	0.167655
Tmpo_K392	Tmpo	YVPK*YAPLADVK	LAP2B_MOUSE Lamina-associated polypeptide 2, isoforms beta/delta/epsilon/gamma OS=Mus musculus OX=10090 GN=Tmpo PE=1 SV=4	1.16	0.396119
Rrm1_K496	Rrm1	IIDINYYPIPEAHLSNK*R	RIR1_MOUSE Ribonucleoside-diphosphate reductase large subunit OS=Mus musculus OX=10090 GN=Rrm1 PE=1 SV=2	1.16	0.423858
Trim28_K200	Trim28	STGPAK*TR	TIF1B_MOUSE Transcription intermediary factor 1-beta OS=Mus musculus OX=10090 GN=Trim28 PE=1 SV=3	1.16	0.527529
Bckdk_K89	Bckdk	SQDGSHLLK*SGR	BCKD_MOUSE [3-methyl-2-oxobutanoate dehydrogenase [lipoamide]] kinase, mitochondrial OS=Mus musculus OX=10090 GN=Bckdk PE=1 SV=1	1.16	0.552996
Rpl24_K135	Rpl24	APTK*AAPK	RL24_MOUSE 60S ribosomal protein L24 OS=Mus musculus OX=10090 GN=Rpl24 PE=1 SV=2	1.159	0.218084
Tbcb_K153	Tbcb	LSEEK*AQASAISVGSR	TBCB_MOUSE Tubulin-folding cofactor B OS=Mus musculus OX=10090 GN=Tbcb PE=1 SV=2	1.15833	0.129754
Hnrnpa0_K133	Hnrnpa0	AEIIADK*QSGK	ROA0_MOUSE Heterogeneous nuclear ribonucleoprotein A0 OS=Mus musculus OX=10090 GN=Hnrnpa0 PE=1 SV=1	1.15833	0.366371
Hsp90aa1_K540	Hsp90aa1	EFEGK*TLVSVTK	HS90A_MOUSE Heat shock protein HSP 90-alpha OS=Mus musculus OX=10090 GN=Hsp90aa1 PE=1 SV=4	1.15813	0.207836
Bzw1_K60	Bzw1	FLDASGAK*LDYR	BZW1_MOUSE Basic leucine zipper and W2 domain-containing protein 1 OS=Mus musculus OX=10090 GN=Bzw1 PE=1 SV=1	1.158	0.395466
Capg_K308	Capg	KANEK*ER	CAPG_MOUSE Macrophage-capping protein OS=Mus musculus OX=10090 GN=Capg PE=1 SV=2	1.1575	0.0677151
Hnrnpu_K527	Hnrnpu	QMADTGK*LNTLLQR	HNRPU_MOUSE Heterogeneous nuclear ribonucleoprotein U OS=Mus musculus OX=10090 GN=Hnrnpu PE=1 SV=1	1.1575	0.341141
Myh9_K651	Myh9	TVGQLYK*EQLAK	MYH9_MOUSE Myosin-9 OS=Mus musculus OX=10090 GN=Myh9 PE=1 SV=4	1.15667	0.43529
Cs_K450	Cs	PK*SMSTDGLMK	CISY_MOUSE Citrate synthase, mitochondrial OS=Mus musculus OX=10090 GN=Cs PE=1 SV=1	1.155	0.0389291
Ampd2_K41	Ampd2	TSMDGK*CK	AMPD2_MOUSE AMP deaminase 2 OS=Mus musculus OX=10090 GN=Ampd2 PE=1 SV=1	1.155	0.217067
Mybbp1a_K275	Mybbp1a	LALK*ESR	MBB1A_MOUSE Myb-binding protein 1A OS=Mus musculus OX=10090 GN=Mybbp1a PE=1 SV=2	1.155	0.263154
Hnrnpab_K174	Hnrnpab	IFVGGLNPEATEEK*IR	ROAA_MOUSE Heterogeneous nuclear ribonucleoprotein A/B OS=Mus musculus OX=10090 GN=Hnrnpab PE=1 SV=1	1.155	0.339315
Rfc2_K127	Rfc2	VTLPK*GR	RFC2_MOUSE Replication factor C subunit 2 OS=Mus musculus OX=10090 GN=Rfc2 PE=1 SV=1	1.155	0.350046
Nop58_K422	Nop58	YEHK*SEVK	NOP58_MOUSE Nucleolar protein 58 OS=Mus musculus OX=10090 GN=Nop58 PE=1 SV=1	1.155	0.379048
Rps3_K62	Rps3	TQNVLGEK*GR	RS3_MOUSE 40S ribosomal protein S3 OS=Mus musculus OX=10090 GN=Rps3 PE=1 SV=1	1.155	0.386801
Gapdh_K249	Gapdh	LEK*PAK	G3P_MOUSE Glyceraldehyde-3-phosphate dehydrogenase OS=Mus musculus OX=10090 GN=Gapdh PE=1 SV=2	1.15375	0.257148
Smchd1_K676	Smchd1	TVAEK*TIR	SMHD1_MOUSE Structural maintenance of chromosomes flexible hinge domain-containing protein 1 OS=Mus musculus OX=10090 GN=Smchd1 PE=1 SV=2	1.15333	0.0714119
Cenatac_K31	Cenatac	QLK*GALER	CATAC_MOUSE Centrosomal AT-AC splicing factor OS=Mus musculus OX=10090 GN=Cenatac PE=2 SV=1	1.15333	0.103703
Pdia6_K150	Pdia6	SGGYSSGK*QGR	PDIA6_MOUSE Protein disulfide-isomerase A6 OS=Mus musculus OX=10090 GN=Pdia6 PE=1 SV=3	1.153	0.479114
H2bc9_K21	H2bc9	AITK*AQK	H2B1H_MOUSE Histone H2B type 1-H OS=Mus musculus OX=10090 GN=H2bc9 PE=1 SV=3	1.1525	0.0175187
Eef2_K337	Eef2	EGKPLLK*AVMR	EF2_MOUSE Elongation factor 2 OS=Mus musculus OX=10090 GN=Eef2 PE=1 SV=2	1.1525	0.0913569
Cct7_K250	Cct7	AEK*DNAEIR	TCPH_MOUSE T-complex protein 1 subunit eta OS=Mus musculus OX=10090 GN=Cct7 PE=1 SV=1	1.1525	0.548137
Rpl35_K43	Rpl35	VTGGAASK*LSK	RL35_MOUSE 60S ribosomal protein L35 OS=Mus musculus OX=10090 GN=Rpl35 PE=1 SV=1	1.1525	0.317994
Lonp1_K357	Lonp1	K*EFELSK	LONM_MOUSE Lon protease homolog, mitochondrial OS=Mus musculus OX=10090 GN=Lonp1 PE=1 SV=2	1.1525	0.405722
Septin11_K190	Septin11	ADTIAK*NELHK	SEP11_MOUSE Septin-11 OS=Mus musculus OX=10090 GN=Septin11 PE=1 SV=4	1.1525	0.445598
Set_K71	Set	VEQK*YNK	SET_MOUSE Protein SET OS=Mus musculus OX=10090 GN=Set PE=1 SV=1	1.15187	0.210223
Myl6_K50	Myl6	ALGQNPTNAEVLK*VLGNPK	MYL6_MOUSE Myosin light polypeptide 6 OS=Mus musculus OX=10090 GN=Myl6 PE=1 SV=3	1.15167	0.0681089
Pgk1_K131	Pgk1	FHVEEEGK*GK	PGK1_MOUSE Phosphoglycerate kinase 1 OS=Mus musculus OX=10090 GN=Pgk1 PE=1 SV=4	1.15167	0.531519
Msn_K360	Msn	K*AQQELEEQTR	MOES_MOUSE Moesin OS=Mus musculus OX=10090 GN=Msn PE=1 SV=3	1.15125	0.345205
Tcp1_K538	Tcp1	LHPESK*DDK	TCPA_MOUSE T-complex protein 1 subunit alpha OS=Mus musculus OX=10090 GN=Tcp1 PE=1 SV=3	1.151	0.161572
Snu13_K21	Snu13	K*LLDLVQQSCNYK	NH2L1_MOUSE NHP2-like protein 1 OS=Mus musculus OX=10090 GN=Snu13 PE=1 SV=4	1.151	0.233982
Myh9_K637	Myh9	IIGLDQVAGMSETALPGAFK*TR	MYH9_MOUSE Myosin-9 OS=Mus musculus OX=10090 GN=Myh9 PE=1 SV=4	1.15	0.182396
Pdcd6ip_K374	Pdcd6ip	K*ADLVNR	PDC6I_MOUSE Programmed cell death 6-interacting protein OS=Mus musculus OX=10090 GN=Pdcd6ip PE=1 SV=3	1.15	0.193205
Rpl18_K115	Rpl18	ILK*AGGK	RL18_MOUSE 60S ribosomal protein L18 OS=Mus musculus OX=10090 GN=Rpl18 PE=1 SV=3	1.15	0.619035
Hnrnpm_K650	Hnrnpm	K*ACQIFVR	HNRPM_MOUSE Heterogeneous nuclear ribonucleoprotein M OS=Mus musculus OX=10090 GN=Hnrnpm PE=1 SV=3	1.15
Kpna2_K108	Kpna2	EK*QPPIDNIIR	IMA1_MOUSE Importin subunit alpha-1 OS=Mus musculus OX=10090 GN=Kpna2 PE=1 SV=2	1.15
Rpl35_K97	Rpl35	LTK*HEEK	RL35_MOUSE 60S ribosomal protein L35 OS=Mus musculus OX=10090 GN=Rpl35 PE=1 SV=1	1.15
Cct2_K46	Cct2	STLGPK*GMDK	TCPB_MOUSE T-complex protein 1 subunit beta OS=Mus musculus OX=10090 GN=Cct2 PE=1 SV=4	1.15
Ranbp2_K2411	Ranbp2	VK*PDKCELPQNSDIK	RBP2_MOUSE E3 SUMO-protein ligase RanBP2 OS=Mus musculus OX=10090 GN=Ranbp2 PE=1 SV=2	1.15
Lmnb1_K103	Lmnb1	AK*LQIELGK	LMNB1_MOUSE Lamin-B1 OS=Mus musculus OX=10090 GN=Lmnb1 PE=1 SV=3	1.15
Xrcc6_K72	Xrcc6	K*LLSSDR	XRCC6_MOUSE X-ray repair cross-complementing protein 6 OS=Mus musculus OX=10090 GN=Xrcc6 PE=1 SV=5	1.15
St13_K117	St13	K*GAAIEALNDGELQK	F10A1_MOUSE Hsc70-interacting protein OS=Mus musculus OX=10090 GN=St13 PE=1 SV=1	1.15
Eif3h_K5	Eif3h	K*EGTGSTATSSGSAGGAVGK	EIF3H_MOUSE Eukaryotic translation initiation factor 3 subunit H OS=Mus musculus OX=10090 GN=Eif3h PE=1 SV=1	1.15
Dhx9_K499	Dhx9	K*LEAGIR	DHX9_MOUSE ATP-dependent RNA helicase A OS=Mus musculus OX=10090 GN=Dhx9 PE=1 SV=2	1.15
Edc4_K111	Edc4	LSSK*AR	EDC4_MOUSE Enhancer of mRNA-decapping protein 4 OS=Mus musculus OX=10090 GN=Edc4 PE=1 SV=2	1.15
Ddx58_K395	Ddx58	YLDHK*LGESR	DDX58_MOUSE Antiviral innate immune response receptor RIG-I OS=Mus musculus OX=10090 GN=Ddx58 PE=1 SV=2	1.15
Rps8_K157	Rps8	NAK*ISSLLEEQFQQGK	RS8_MOUSE 40S ribosomal protein S8 OS=Mus musculus OX=10090 GN=Rps8 PE=1 SV=2	1.15
Hspa9_K394	Hspa9	MPK*VQQTVQDLFGR	GRP75_MOUSE Stress-70 protein, mitochondrial OS=Mus musculus OX=10090 GN=Hspa9 PE=1 SV=3	1.15
Ruvbl1_K232	Ruvbl1	K*EIIQDVTLHDLDVANAR	RUVB1_MOUSE RuvB-like 1 OS=Mus musculus OX=10090 GN=Ruvbl1 PE=1 SV=1	1.15
Usp14_K313	Usp14	NALYIK*SSK	UBP14_MOUSE Ubiquitin carboxyl-terminal hydrolase 14 OS=Mus musculus OX=10090 GN=Usp14 PE=1 SV=3	1.15	0.0422415
Ncl_K569	Ncl	SQPSK*TLFVK	NUCL_MOUSE Nucleolin OS=Mus musculus OX=10090 GN=Ncl PE=1 SV=2	1.15	0.0843371
Set_K27	Set	LEDK*SASPGLPK	SET_MOUSE Protein SET OS=Mus musculus OX=10090 GN=Set PE=1 SV=1	1.15	0.0872576
Taldo1_K321	Taldo1	FAADAIK*LER	TALDO_MOUSE Transaldolase OS=Mus musculus OX=10090 GN=Taldo1 PE=1 SV=2	1.15	0.34404
Eif3a_K603	Eif3a	EAELQK*VR	EIF3A_MOUSE Eukaryotic translation initiation factor 3 subunit A OS=Mus musculus OX=10090 GN=Eif3a PE=1 SV=5	1.15	0.360978
Snrnp70_K162	Snrnp70	DMHSAYK*HADGK	RU17_MOUSE U1 small nuclear ribonucleoprotein 70 kDa OS=Mus musculus OX=10090 GN=Snrnp70 PE=1 SV=2	1.15	0.401337
Nob1_K306	Nob1	NPK*VLNPR	NOB1_MOUSE RNA-binding protein NOB1 OS=Mus musculus OX=10090 GN=Nob1 PE=1 SV=1	1.15	0.590334
Pkm_K206	Pkm	GADFLVTEVENGGSLGSK*K	KPYM_MOUSE Pyruvate kinase PKM OS=Mus musculus OX=10090 GN=Pkm PE=1 SV=4	1.14938	0.124102
Ube2l3_K73	Ube2l3	TK*IYHPNIDEK	UB2L3_MOUSE Ubiquitin-conjugating enzyme E2 L3 OS=Mus musculus OX=10090 GN=Ube2l3 PE=1 SV=1	1.14875	0.295911
Eif3h_K269	Eif3h	NTSK*QQQQK	EIF3H_MOUSE Eukaryotic translation initiation factor 3 subunit H OS=Mus musculus OX=10090 GN=Eif3h PE=1 SV=1	1.14875	0.379641
Hcls1_K257	Hcls1	KREEEEK*AQQMAR	HCLS1_MOUSE Hematopoietic lineage cell-specific protein OS=Mus musculus OX=10090 GN=Hcls1 PE=1 SV=2	1.14833	0.1225
Oat_K405	Oat	DNGLLAK*PTHGDIIR	OAT_MOUSE Ornithine aminotransferase, mitochondrial OS=Mus musculus OX=10090 GN=Oat PE=1 SV=1	1.1475	0.158479
Vim_K139	Vim	ILLAELEQLK*GQGK	VIME_MOUSE Vimentin OS=Mus musculus OX=10090 GN=Vim PE=1 SV=3	1.1475	0.392856
Eif3b_K723	Eif3b	IFEQK*DR	EIF3B_MOUSE Eukaryotic translation initiation factor 3 subunit B OS=Mus musculus OX=10090 GN=Eif3b PE=1 SV=1	1.14667	0.128667
Pwp2_K700	Pwp2	HFK*PEIR	PWP2_MOUSE Periodic tryptophan protein 2 homolog OS=Mus musculus OX=10090 GN=Pwp2 PE=1 SV=1	1.14667	0.552602
Dnm2_K299	Dnm2	SK*LQSQLLSLEK	DYN2_MOUSE Dynamin-2 OS=Mus musculus OX=10090 GN=Dnm2 PE=1 SV=2	1.14667	0.564847
Anxa2_K227	Anxa2	SVCHLQK*VFER	ANXA2_MOUSE Annexin A2 OS=Mus musculus OX=10090 GN=Anxa2 PE=1 SV=2	1.14562	0.490481
Set_K188	Set	SSQTQNK*ASR	SET_MOUSE Protein SET OS=Mus musculus OX=10090 GN=Set PE=1 SV=1	1.145	0.335912
Cct4_K395	Cct4	GSNK*LVIEEAER	TCPD_MOUSE T-complex protein 1 subunit delta OS=Mus musculus OX=10090 GN=Cct4 PE=1 SV=3	1.145
Ddx21_K645	Ddx21	IGVPSATEIIK*ASSK	DDX21_MOUSE Nucleolar RNA helicase 2 OS=Mus musculus OX=10090 GN=Ddx21 PE=1 SV=3	1.145	0.0984603
Eif5b_K349	Eif5b	AIQEALAK*LK	IF2P_MOUSE Eukaryotic translation initiation factor 5B OS=Mus musculus OX=10090 GN=Eif5b PE=1 SV=2	1.145	0.150765
Myh9_K1724	Myh9	GALALEEK*R	MYH9_MOUSE Myosin-9 OS=Mus musculus OX=10090 GN=Myh9 PE=1 SV=4	1.145	0.32755
Paics_K36	Paics	VLLQSK*DQITAGNAAR	PUR6_MOUSE Multifunctional protein ADE2 OS=Mus musculus OX=10090 GN=Paics PE=1 SV=4	1.145	0.521213
Sec61a1_K268	Sec61a1	VDLPIK*SAR	S61A1_MOUSE Protein transport protein Sec61 subunit alpha isoform 1 OS=Mus musculus OX=10090 GN=Sec61a1 PE=1 SV=2	1.145	0.64805
Fxr1_K295	Fxr1	NLVGK*VIGK	FXR1_MOUSE Fragile X mental retardation syndrome-related protein 1 OS=Mus musculus OX=10090 GN=Fxr1 PE=1 SV=2	1.145	0.29561
Ncl_K63	Ncl	K*VVVSQTK	NUCL_MOUSE Nucleolin OS=Mus musculus OX=10090 GN=Ncl PE=1 SV=2	1.14429	0.433964
Pdia3_K130	Pdia3	K*QAGPASVPLR	PDIA3_MOUSE Protein disulfide-isomerase A3 OS=Mus musculus OX=10090 GN=Pdia3 PE=1 SV=2	1.14333	0.155886
H2ac20_K96	H2ac20	NDEELNK*LLGK	H2A2C_MOUSE Histone H2A type 2-C OS=Mus musculus OX=10090 GN=H2ac20 PE=1 SV=3	1.14333	0.431199
Rrbp1_K1061	Rrbp1	ALEAK*AATFEK	RRBP1_MOUSE Ribosome-binding protein 1 OS=Mus musculus OX=10090 GN=Rrbp1 PE=1 SV=2	1.1425	0.0777314
Ptges3_K79	Ptges3	K*GESGQSWPR	TEBP_MOUSE Prostaglandin E synthase 3 OS=Mus musculus OX=10090 GN=Ptges3 PE=1 SV=1	1.142	0.178992
Aldoa_K42	Aldoa	GILAADESTGSIAK*R	ALDOA_MOUSE Fructose-bisphosphate aldolase A OS=Mus musculus OX=10090 GN=Aldoa PE=1 SV=2	1.14187	0.158861
Ddx5_K388	Ddx5	DWVLNEFK*HGK	DDX5_MOUSE Probable ATP-dependent RNA helicase DDX5 OS=Mus musculus OX=10090 GN=Ddx5 PE=1 SV=2	1.14167	0.424558
Ldha_K76	Ldha	TPK*IVSSK	LDHA_MOUSE L-lactate dehydrogenase A chain OS=Mus musculus OX=10090 GN=Ldha PE=1 SV=3	1.14143	0.350705
U2surp_K80	U2surp	PLLENK*LK	SR140_MOUSE U2 snRNP-associated SURP motif-containing protein OS=Mus musculus OX=10090 GN=U2surp PE=1 SV=3	1.14143	0.248006
H4c1_K92	H4c1	TVTAMDVVYALK*R	H4_MOUSE Histone H4 OS=Mus musculus OX=10090 GN=H4c1 PE=1 SV=2	1.14125	0.190076
Set_K166	Set	EFHLNESGDPSSK*STEIK	SET_MOUSE Protein SET OS=Mus musculus OX=10090 GN=Set PE=1 SV=1	1.14062	0.145046
Eef1g_K219	Eef1g	MAQFDAK*K	EF1G_MOUSE Elongation factor 1-gamma OS=Mus musculus OX=10090 GN=Eef1g PE=1 SV=3	1.14	0.218367
Me1_K492	Me1	VFLTTAEVISQQVSDK*HLQEGR	MAOX_MOUSE NADP-dependent malic enzyme OS=Mus musculus OX=10090 GN=Me1 PE=1 SV=2	1.14	0.295163
Ncl_K96	Ncl	K*NITPAK	NUCL_MOUSE Nucleolin OS=Mus musculus OX=10090 GN=Ncl PE=1 SV=2	1.14	0.305517
Matr3_K835	Matr3	FLNK*LAEER	MATR3_MOUSE Matrin-3 OS=Mus musculus OX=10090 GN=Matr3 PE=1 SV=1	1.14	0.394862
H1-5_K158	H1-5	K*PAAAGVK	H15_MOUSE Histone H1.5 OS=Mus musculus OX=10090 GN=H1-5 PE=1 SV=2	1.14	0.595729
H3-3a_K28	H3-3a	K*SAPSTGGVK	H33_MOUSE Histone H3.3 OS=Mus musculus OX=10090 GN=H3-3a PE=1 SV=2	1.14
Hspd1_K31	Hspd1	DVK*FGADAR	CH60_MOUSE 60 kDa heat shock protein, mitochondrial OS=Mus musculus OX=10090 GN=Hspd1 PE=1 SV=1	1.14
H4c1_K60	H4c1	K*VFLENVIR	H4_MOUSE Histone H4 OS=Mus musculus OX=10090 GN=H4c1 PE=1 SV=2	1.14
Fen1_K199	Fen1	K*LPIQEFHLSR	FEN1_MOUSE Flap endonuclease 1 OS=Mus musculus OX=10090 GN=Fen1 PE=1 SV=1	1.14
Eif4g1_K948	Eif4g1	LLTTIGK*DLDFAK	IF4G1_MOUSE Eukaryotic translation initiation factor 4 gamma 1 OS=Mus musculus OX=10090 GN=Eif4g1 PE=1 SV=1	1.14
Ap2m1_K405	Ap2m1	YLK*VFEPK	AP2M1_MOUSE AP-2 complex subunit mu OS=Mus musculus OX=10090 GN=Ap2m1 PE=1 SV=1	1.14
Iars1_K844	Iars1	TIPIK*YPLK	SYIC_MOUSE Isoleucine--tRNA ligase, cytoplasmic OS=Mus musculus OX=10090 GN=Iars1 PE=1 SV=2	1.14
Rpn2_K306	Rpn2	LQVSNVLSQPLAQAAVK*LEHAK	RPN2_MOUSE Dolichyl-diphosphooligosaccharide--protein glycosyltransferase subunit 2 OS=Mus musculus OX=10090 GN=Rpn2 PE=1 SV=1	1.14
Psme3ip1_K157	Psme3ip1	LLAGAVK*HK	PIP30_MOUSE PSME3-interacting protein OS=Mus musculus OX=10090 GN=Psme3ip1 PE=1 SV=1	1.14
Hadha_K415	Hadha	K*ALTSFER	ECHA_MOUSE Trifunctional enzyme subunit alpha, mitochondrial OS=Mus musculus OX=10090 GN=Hadha PE=1 SV=1	1.14
Rrbp1_K712	Rrbp1	K*GEGTQNQGK	RRBP1_MOUSE Ribosome-binding protein 1 OS=Mus musculus OX=10090 GN=Rrbp1 PE=1 SV=2	1.14
Ncl_K350	Ncl	K*FGYVDFESAEDLEK	NUCL_MOUSE Nucleolin OS=Mus musculus OX=10090 GN=Ncl PE=1 SV=2	1.14
Tuba4a_K112	Tuba4a	GHYTIGK*EIIDPVLDR	TBA4A_MOUSE Tubulin alpha-4A chain OS=Mus musculus OX=10090 GN=Tuba4a PE=1 SV=1	1.14
Pgk1_K361	Pgk1	SLMDEVVK*ATSR	PGK1_MOUSE Phosphoglycerate kinase 1 OS=Mus musculus OX=10090 GN=Pgk1 PE=1 SV=4	1.14
gag_K373	gag	LK*EAYR	GAG_MLVMS Gag polyprotein OS=Moloney murine leukemia virus (isolate Shinnick) OX=928306 GN=gag PE=1 SV=4	1.14
Rbm25_K515	Rbm25	GSALQK*R	RBM25_MOUSE RNA-binding protein 25 OS=Mus musculus OX=10090 GN=Rbm25 PE=1 SV=2	1.14
P4hb_K469	P4hb	TLDGFK*K	PDIA1_MOUSE Protein disulfide-isomerase OS=Mus musculus OX=10090 GN=P4hb PE=1 SV=2	1.14
Hsp90aa1_K658	Hsp90aa1	AEADKNDK*SVK	HS90A_MOUSE Heat shock protein HSP 90-alpha OS=Mus musculus OX=10090 GN=Hsp90aa1 PE=1 SV=4	1.14	0.215374
Ush1g_K438	Ush1g	K*ILGAVR	USH1G_MOUSE Usher syndrome type-1G protein homolog OS=Mus musculus OX=10090 GN=Ush1g PE=1 SV=1	1.14	0.270859
Mcm5_K280	Mcm5	FGLNPSK*GR	MCM5_MOUSE DNA replication licensing factor MCM5 OS=Mus musculus OX=10090 GN=Mcm5 PE=1 SV=2	1.14	0.425952
Eprs1_K512	Eprs1	YVALLK*K	SYEP_MOUSE Bifunctional glutamate/proline--tRNA ligase OS=Mus musculus OX=10090 GN=Eprs1 PE=1 SV=4	1.14	0.529838
Numa1_K1512	Numa1	YEGAK*VK	NUMA1_MOUSE Nuclear mitotic apparatus protein 1 OS=Mus musculus OX=10090 GN=Numa1 PE=1 SV=1	1.14	0.704833
Vapb_K17	Vapb	VEQVLSLEPQHELK*FR	VAPB_MOUSE Vesicle-associated membrane protein-associated protein B OS=Mus musculus OX=10090 GN=Vapb PE=1 SV=3	1.14	0.713674
Fkbp4_K424	Fkbp4	LAEEEHK*VK	FKBP4_MOUSE Peptidyl-prolyl cis-trans isomerase FKBP4 OS=Mus musculus OX=10090 GN=Fkbp4 PE=1 SV=5	1.13833	0.136087
Mapkapk2_K357	Mapkapk2	VDYEQIK*IK	MAPK2_MOUSE MAP kinase-activated protein kinase 2 OS=Mus musculus OX=10090 GN=Mapkapk2 PE=1 SV=2	1.13833	0.545593
Snx9_K516	Snx9	GAIEK*VK	SNX9_MOUSE Sorting nexin-9 OS=Mus musculus OX=10090 GN=Snx9 PE=1 SV=1	1.13833	0.188357
Hspa5_K621	Hspa5	K*KELEEIVQPIISK	BIP_MOUSE Endoplasmic reticulum chaperone BiP OS=Mus musculus OX=10090 GN=Hspa5 PE=1 SV=3	1.138	0.521224
Rpl3_K294	Rpl3	IGQGYLIK*DGK	RL3_MOUSE 60S ribosomal protein L3 OS=Mus musculus OX=10090 GN=Rpl3 PE=1 SV=3	1.13786	0.437472
Ppia_K49	Ppia	FGYK*GSSFHR GFGYK*GSSFHR	PPIA_MOUSE Peptidyl-prolyl cis-trans isomerase A OS=Mus musculus OX=10090 GN=Ppia PE=1 SV=2	1.1375	0.290197
Rpl14_K179	Rpl14	AAGQK*APAQK	RL14_MOUSE 60S ribosomal protein L14 OS=Mus musculus OX=10090 GN=Rpl14 PE=1 SV=3	1.13714	0.310185
H2ax_K128	H2ax	SSATVGPK*APAVGK	H2AX_MOUSE Histone H2AX OS=Mus musculus OX=10090 GN=H2ax PE=1 SV=2	1.13667	0.00762163
Rpl7a_K131	Rpl7a	GDVPTK*RPPVLR	RL7A_MOUSE 60S ribosomal protein L7a OS=Mus musculus OX=10090 GN=Rpl7a PE=1 SV=2	1.13667	0.249567
Larp4_K504	Larp4	MSDVVK*GVCR	LARP4_MOUSE La-related protein 4 OS=Mus musculus OX=10090 GN=Larp4 PE=1 SV=2	1.13667	0.583687
Vdac3_K226	Vdac3	YK*LDCR	VDAC3_MOUSE Voltage-dependent anion-selective channel protein 3 OS=Mus musculus OX=10090 GN=Vdac3 PE=1 SV=1	1.13667	0.306478
Cap1_K397	Cap1	DVK*VQVMGK	CAP1_MOUSE Adenylyl cyclase-associated protein 1 OS=Mus musculus OX=10090 GN=Cap1 PE=1 SV=4	1.13625	0.0357755
Rpl4_K415	Rpl4	KPTTEEK*KPAA	RL4_MOUSE 60S ribosomal protein L4 OS=Mus musculus OX=10090 GN=Rpl4 PE=1 SV=3	1.13583	0.319281
Tpm3_K137	Tpm3	ALK*DEEK	TPM3_MOUSE Tropomyosin alpha-3 chain OS=Mus musculus OX=10090 GN=Tpm3 PE=1 SV=3	1.13571	0.172026
Rps25_K94	Rps25	AALQELLSK*GLIK	RS25_MOUSE 40S ribosomal protein S25 OS=Mus musculus OX=10090 GN=Rps25 PE=1 SV=1	1.13563	0.227085
S100a4_K48	S100a4	LPSFLGK*R ELPSFLGK*R	S10A4_MOUSE Protein S100-A4 OS=Mus musculus OX=10090 GN=S100a4 PE=1 SV=1	1.135	0.151887
Ogdh_K1000	Ogdh	K*THLTELQR	ODO1_MOUSE 2-oxoglutarate dehydrogenase, mitochondrial OS=Mus musculus OX=10090 GN=Ogdh PE=1 SV=3	1.135
Nemf_K1002	Nemf	VK*LTPGVQK	NEMF_MOUSE Nuclear export mediator factor Nemf OS=Mus musculus OX=10090 GN=Nemf PE=1 SV=2	1.135	0.581693
Med17_K621	Med17	GPFK*EVQWNK	MED17_MOUSE Mediator of RNA polymerase II transcription subunit 17 OS=Mus musculus OX=10090 GN=Med17 PE=1 SV=1	1.135	0.679382
Inpp5d_K571	Inpp5d	FLALGDK*K	SHIP1_MOUSE Phosphatidylinositol 3,4,5-trisphosphate 5-phosphatase 1 OS=Mus musculus OX=10090 GN=Inpp5d PE=1 SV=2	1.135	0.768657
Hmgb1_K114	Hmgb1	IK*GEHPGLSIGDVAK	HMGB1_MOUSE High mobility group protein B1 OS=Mus musculus OX=10090 GN=Hmgb1 PE=1 SV=2	1.13437	0.40901
Hyou1_K797	Hyou1	DK*LAELR	HYOU1_MOUSE Hypoxia up-regulated protein 1 OS=Mus musculus OX=10090 GN=Hyou1 PE=1 SV=1	1.13375	0.261019
Ncl_K546	Ncl	EALNSCNK*MEIEGR	NUCL_MOUSE Nucleolin OS=Mus musculus OX=10090 GN=Ncl PE=1 SV=2	1.13333	0.453234
Snd1_K513	Snd1	VADISGDTQK*AK	SND1_MOUSE Staphylococcal nuclease domain-containing protein 1 OS=Mus musculus OX=10090 GN=Snd1 PE=1 SV=1	1.13333	0.463655
Ncl_K379	Ncl	VFGNEIK*LEKPK	NUCL_MOUSE Nucleolin OS=Mus musculus OX=10090 GN=Ncl PE=1 SV=2	1.13312	0.196353
Aldoa_K14	Aldoa	K*ELSDIAHR	ALDOA_MOUSE Fructose-bisphosphate aldolase A OS=Mus musculus OX=10090 GN=Aldoa PE=1 SV=2	1.1325	0.190671
Mov10_K148	Mov10	K*EVLTLR	MOV10_MOUSE Putative helicase MOV-10 OS=Mus musculus OX=10090 GN=Mov10 PE=1 SV=2	1.1325	0.317392
Snx2_K447	Snx2	IQQAK*NEIR	SNX2_MOUSE Sorting nexin-2 OS=Mus musculus OX=10090 GN=Snx2 PE=1 SV=2	1.13167	0.27529
Hnrnpk_K60	Hnrnpk	NAGAVIGK*GGK	HNRPK_MOUSE Heterogeneous nuclear ribonucleoprotein K OS=Mus musculus OX=10090 GN=Hnrnpk PE=1 SV=1	1.13125	0.0594729
Tln1_K2133	Tln1	TVK*AVEDEATK	TLN1_MOUSE Talin-1 OS=Mus musculus OX=10090 GN=Tln1 PE=1 SV=2	1.13125	0.236321
Ncl_K478	Ncl	TGK*TSTWSGESK	NUCL_MOUSE Nucleolin OS=Mus musculus OX=10090 GN=Ncl PE=1 SV=2	1.13	0.172225
Rtn4_K1153	Rtn4	IQAK*IPGLK	RTN4_MOUSE Reticulon-4 OS=Mus musculus OX=10090 GN=Rtn4 PE=1 SV=2	1.13	0.26077
Swap70_K5	Swap70	GLK*DELLK	SWP70_MOUSE Switch-associated protein 70 OS=Mus musculus OX=10090 GN=Swap70 PE=1 SV=2	1.13	0.338031
Strap_K137	Strap	IYDLNKPEAEPK*EISGHTSGIK	STRAP_MOUSE Serine-threonine kinase receptor-associated protein OS=Mus musculus OX=10090 GN=Strap PE=1 SV=2	1.13	0.397097
Smc2_K677	Smc2	SQAASILTK*FQEVK	SMC2_MOUSE Structural maintenance of chromosomes protein 2 OS=Mus musculus OX=10090 GN=Smc2 PE=1 SV=2	1.13	0.457233
Rpl3_K115	Rpl3	TVFAEHISDECK*R	RL3_MOUSE 60S ribosomal protein L3 OS=Mus musculus OX=10090 GN=Rpl3 PE=1 SV=3	1.13	0.660231
Hist2h2aa1_K96	Hist2h2aa1	NDEELNK*LLGK	H2A2A_MOUSE Histone H2A type 2-A OS=Mus musculus OX=10090 GN=Hist2h2aa1 PE=1 SV=3	1.13	0.683967
Ikzf1_K219	Ikzf1	SSLEEHK*ER	IKZF1_MOUSE DNA-binding protein Ikaros OS=Mus musculus OX=10090 GN=Ikzf1 PE=1 SV=2	1.13
Nucks1_K175	Nucks1	LK*ATVTPSPVK	NUCKS_MOUSE Nuclear ubiquitous casein and cyclin-dependent kinase substrate 1 OS=Mus musculus OX=10090 GN=Nucks1 PE=1 SV=1	1.13
Fmn1_K1116	Fmn1	AQEDELTK*IR	FMN1_MOUSE Formin-1 OS=Mus musculus OX=10090 GN=Fmn1 PE=1 SV=2	1.13
Smc4_K282	Smc4	GEK*LNR	SMC4_MOUSE Structural maintenance of chromosomes protein 4 OS=Mus musculus OX=10090 GN=Smc4 PE=1 SV=1	1.13
Cebpz_K692	Cebpz	GGK*QIK	CEBPZ_MOUSE CCAAT/enhancer-binding protein zeta OS=Mus musculus OX=10090 GN=Cebpz PE=1 SV=2	1.13
Rps6_K203	Rps6	NK*EEAAEYAK	RS6_MOUSE 40S ribosomal protein S6 OS=Mus musculus OX=10090 GN=Rps6 PE=1 SV=1	1.13
Rrbp1_K1368	Rrbp1	VGAAEEELHK*SR	RRBP1_MOUSE Ribosome-binding protein 1 OS=Mus musculus OX=10090 GN=Rrbp1 PE=1 SV=2	1.13
Rpn1_K188	Rpn1	NVESYTK*LGNPSR	RPN1_MOUSE Dolichyl-diphosphooligosaccharide--protein glycosyltransferase subunit 1 OS=Mus musculus OX=10090 GN=Rpn1 PE=1 SV=1	1.13
Vim_K402	Vim	K*LLEGEESR	VIME_MOUSE Vimentin OS=Mus musculus OX=10090 GN=Vim PE=1 SV=3	1.13	4.09905396907994E 17
Pabpc1_K512	Pabpc1	TVPQYK*YAAGVR	PABP1_MOUSE Polyadenylate-binding protein 1 OS=Mus musculus OX=10090 GN=Pabpc1 PE=1 SV=2	1.13	0.312869
Psma2_K171	Psma2	NYVNGK*TFLEK	PSA2_MOUSE Proteasome subunit alpha type-2 OS=Mus musculus OX=10090 GN=Psma2 PE=1 SV=3	1.13	0.372278
Fmnl1_K86	Fmnl1	NPPAAYIQK*LK	FMNL1_MOUSE Formin-like protein 1 OS=Mus musculus OX=10090 GN=Fmnl1 PE=1 SV=1	1.13	0.751633
Ruvbl1_K2	Ruvbl1	MK*IEEVK	RUVB1_MOUSE RuvB-like 1 OS=Mus musculus OX=10090 GN=Ruvbl1 PE=1 SV=1	1.129	0.442142
Vapa_K125	Vapa	EAKPDELMDSK*LR	VAPA_MOUSE Vesicle-associated membrane protein-associated protein A OS=Mus musculus OX=10090 GN=Vapa PE=1 SV=2	1.12875	0.105328
Psmc2_K58	Psmc2	K*INELTGIK	PRS7_MOUSE 26S proteasome regulatory subunit 7 OS=Mus musculus OX=10090 GN=Psmc2 PE=1 SV=5	1.12875	0.401017
Tcp1_K541	Tcp1	DDK*HGSYENAVHSGALDD	TCPA_MOUSE T-complex protein 1 subunit alpha OS=Mus musculus OX=10090 GN=Tcp1 PE=1 SV=3	1.12833	0.669899
Me1_K60	Me1	IIK*NFER	MAOX_MOUSE NADP-dependent malic enzyme OS=Mus musculus OX=10090 GN=Me1 PE=1 SV=2	1.1275	0.29015
Tcof1_K1173	Tcof1	LK*ATEAIK	TCOF_MOUSE Treacle protein OS=Mus musculus OX=10090 GN=Tcof1 PE=1 SV=1	1.12667	0.326139
Lmnb1_K475	Lmnb1	K*IGDTSVSYK	LMNB1_MOUSE Lamin-B1 OS=Mus musculus OX=10090 GN=Lmnb1 PE=1 SV=3	1.12625	0.394327
Tcp1_K499	Tcp1	DNK*QAGVFEPTIVK	TCPA_MOUSE T-complex protein 1 subunit alpha OS=Mus musculus OX=10090 GN=Tcp1 PE=1 SV=3	1.126	0.471258
Dhx15_K786	Dhx15	IIAK*LQSK	DHX15_MOUSE Pre-mRNA-splicing factor ATP-dependent RNA helicase DHX15 OS=Mus musculus OX=10090 GN=Dhx15 PE=1 SV=2	1.12583	0.188194
Psmb3_K77	Psmb3	LNLYELK*EGR	PSB3_MOUSE Proteasome subunit beta type-3 OS=Mus musculus OX=10090 GN=Psmb3 PE=1 SV=1	1.125	0.542807
Hnrnpa2b1_K168	Hnrnpa2b1	GFGFVTFDDHDPVDK*IVLQK	ROA2_MOUSE Heterogeneous nuclear ribonucleoproteins A2/B1 OS=Mus musculus OX=10090 GN=Hnrnpa2b1 PE=1 SV=2	1.125
Hnrnpu_K646	Hnrnpu	LLEQYK*EESKK	HNRPU_MOUSE Heterogeneous nuclear ribonucleoprotein U OS=Mus musculus OX=10090 GN=Hnrnpu PE=1 SV=1	1.125
Lrrc59_K219	Lrrc59	K*EANQAPK	LRC59_MOUSE Leucine-rich repeat-containing protein 59 OS=Mus musculus OX=10090 GN=Lrrc59 PE=1 SV=1	1.125	0.389897
Ywhaq_K9	Ywhaq	TELIQK*AK	1433T_MOUSE 14-3-3 protein theta OS=Mus musculus OX=10090 GN=Ywhaq PE=1 SV=1	1.125	0.451531
Hspd1_K292	Hspd1	LK*VGLQVVAVK	CH60_MOUSE 60 kDa heat shock protein, mitochondrial OS=Mus musculus OX=10090 GN=Hspd1 PE=1 SV=1	1.125	0.473489
Dek_K181	Dek	SGVNSELVK*R	DEK_MOUSE Protein DEK OS=Mus musculus OX=10090 GN=Dek PE=1 SV=1	1.125	0.5
Fkbp4_K390	Fkbp4	AAK*TQLAVCQQR	FKBP4_MOUSE Peptidyl-prolyl cis-trans isomerase FKBP4 OS=Mus musculus OX=10090 GN=Fkbp4 PE=1 SV=5	1.125	0.524473
Ncl_K235	Ncl	VVPMK*AK	NUCL_MOUSE Nucleolin OS=Mus musculus OX=10090 GN=Ncl PE=1 SV=2	1.125	0.529835
Rbm25_K69	Rbm25	K*DHPGLK	RBM25_MOUSE RNA-binding protein 25 OS=Mus musculus OX=10090 GN=Rbm25 PE=1 SV=2	1.125	0.84253
Hsph1_K704	Hsph1	MGTPVK*VR	HS105_MOUSE Heat shock protein 105 kDa OS=Mus musculus OX=10090 GN=Hsph1 PE=1 SV=2	1.12375	0.18967
Atp5f1a_K427	Atp5f1a	AMK*QVAGTMK	ATPA_MOUSE ATP synthase subunit alpha, mitochondrial OS=Mus musculus OX=10090 GN=Atp5f1a PE=1 SV=1	1.12333	0.562215
Eef2_K259	Eef2	K*LWGDR	EF2_MOUSE Elongation factor 2 OS=Mus musculus OX=10090 GN=Eef2 PE=1 SV=2	1.12313	0.334354
Eif4a1_K146	Eif4a1	AEVQK*LQMEAPHIIVGTPGR	IF4A1_MOUSE Eukaryotic initiation factor 4A-I OS=Mus musculus OX=10090 GN=Eif4a1 PE=1 SV=1	1.12312	0.283007
Shmt2_K181	Shmt2	IMGLDLPDGGHLTHGYMSDVK*R	GLYM_MOUSE Serine hydroxymethyltransferase, mitochondrial OS=Mus musculus OX=10090 GN=Shmt2 PE=1 SV=1	1.12286	0.408781
Rac2_K166	Rac2	GLK*TVFDEAIR	RAC2_MOUSE Ras-related C3 botulinum toxin substrate 2 OS=Mus musculus OX=10090 GN=Rac2 PE=1 SV=1	1.1225	0.177553
Ube2l3_K9	Ube2l3	LMK*ELEEIRK	UB2L3_MOUSE Ubiquitin-conjugating enzyme E2 L3 OS=Mus musculus OX=10090 GN=Ube2l3 PE=1 SV=1	1.1225	0.447428
Ampd2_K101	Ampd2	AK*QDFLK	AMPD2_MOUSE AMP deaminase 2 OS=Mus musculus OX=10090 GN=Ampd2 PE=1 SV=1	1.122	0.218917
Pdia6_K235	Pdia6	YGIK*GFPTIK	PDIA6_MOUSE Protein disulfide-isomerase A6 OS=Mus musculus OX=10090 GN=Pdia6 PE=1 SV=3	1.12167	0.112546
Pdcd6ip_K501	Pdcd6ip	AVLDK*AVQADGQVK	PDC6I_MOUSE Programmed cell death 6-interacting protein OS=Mus musculus OX=10090 GN=Pdcd6ip PE=1 SV=3	1.121	0.470994
Fam50a_K305	Fam50a	LLSDATVEKDESHAGK*VVLR	FA50A_MOUSE Protein FAM50A OS=Mus musculus OX=10090 GN=Fam50a PE=1 SV=1	1.12
Mta2_K449	Mta2	LLAK*NR	MTA2_MOUSE Metastasis-associated protein MTA2 OS=Mus musculus OX=10090 GN=Mta2 PE=1 SV=1	1.12
Trmt2a_K137	Trmt2a	PK*ADPMAR	TRM2A_MOUSE tRNA (uracil-5-)-methyltransferase homolog A OS=Mus musculus OX=10090 GN=Trmt2a PE=1 SV=1	1.12
Eif4g2_K540	Eif4g2	KPPPSK*EELLK	IF4G2_MOUSE Eukaryotic translation initiation factor 4 gamma 2 OS=Mus musculus OX=10090 GN=Eif4g2 PE=1 SV=2	1.12
Zfp36l1_K103	Zfp36l1	LLPTQK*QPGSGQVNSSR	TISB_MOUSE mRNA decay activator protein ZFP36L1 OS=Mus musculus OX=10090 GN=Zfp36l1 PE=1 SV=1	1.12
Rbm27_K806	Rbm27	LCSGSK*SHDVQEVLK	RBM27_MOUSE RNA-binding protein 27 OS=Mus musculus OX=10090 GN=Rbm27 PE=1 SV=3	1.12
Hspa8_K328	Hspa8	DAKLDK*SQIHDIVLVGGSTR	HSP7C_MOUSE Heat shock cognate 71 kDa protein OS=Mus musculus OX=10090 GN=Hspa8 PE=1 SV=1	1.12
Tdrd3_K342	Tdrd3	GK*GRGRGR	TDRD3_MOUSE Tudor domain-containing protein 3 OS=Mus musculus OX=10090 GN=Tdrd3 PE=1 SV=4	1.12
Calr_K209	Calr	IK*DPDAAKPEDWDER	CALR_MOUSE Calreticulin OS=Mus musculus OX=10090 GN=Calr PE=1 SV=1	1.12
Nolc1_K33	Nolc1	DSQLSEVASK*FAK	NOLC1_MOUSE Nucleolar and coiled-body phosphoprotein 1 OS=Mus musculus OX=10090 GN=Nolc1 PE=1 SV=1	1.12
gag_K65	gag	DIITQVK*IK	GAG_MLVMS Gag polyprotein OS=Moloney murine leukemia virus (isolate Shinnick) OX=928306 GN=gag PE=1 SV=4	1.12
Hnrnpc_K89	Hnrnpc	MIAGQVLDINLAAEPK*VNR	HNRPC_MOUSE Heterogeneous nuclear ribonucleoproteins C1/C2 OS=Mus musculus OX=10090 GN=Hnrnpc PE=1 SV=1	1.12
Glrx_K28	Glrx	K*TQEILSQLPFK	GLRX1_MOUSE Glutaredoxin-1 OS=Mus musculus OX=10090 GN=Glrx PE=1 SV=3	1.12	0.19707
Ppib_K116	Ppib	GDGTGGK*SIYGER	PPIB_MOUSE Peptidyl-prolyl cis-trans isomerase B OS=Mus musculus OX=10090 GN=Ppib PE=1 SV=2	1.12	0.251324
Usp15_K363	Usp15	AFK*TQVGR	UBP15_MOUSE Ubiquitin carboxyl-terminal hydrolase 15 OS=Mus musculus OX=10090 GN=Usp15 PE=1 SV=1	1.12	0.374332
Hmgb1_K167	Hmgb1	AKGK*PDAAK	HMGB1_MOUSE High mobility group protein B1 OS=Mus musculus OX=10090 GN=Hmgb1 PE=1 SV=2	1.12	0.694608
Rpl4_K294	Rpl4	ILK*SPEIQR	RL4_MOUSE 60S ribosomal protein L4 OS=Mus musculus OX=10090 GN=Rpl4 PE=1 SV=3	1.12	0.283257
Rpl5_K178	Rpl5	GAVDGGLSIPHSTK*R	RL5_MOUSE 60S ribosomal protein L5 OS=Mus musculus OX=10090 GN=Rpl5 PE=1 SV=3	1.12	0.500183
Rcc2_K366	Rcc2	LGHAEQK*DEMVPR	RCC2_MOUSE Protein RCC2 OS=Mus musculus OX=10090 GN=Rcc2 PE=1 SV=1	1.12	0.560649
Tsr1_K38	Tsr1	VGPK*ILCK	TSR1_MOUSE Pre-rRNA-processing protein TSR1 homolog OS=Mus musculus OX=10090 GN=Tsr1 PE=1 SV=1	1.11917	0.0619406
Mthfd1_K58	Mthfd1	LK*AAEEIGIK	C1TC_MOUSE C-1-tetrahydrofolate synthase, cytoplasmic OS=Mus musculus OX=10090 GN=Mthfd1 PE=1 SV=4	1.11917	0.300268
Rps9_K11	Rps9	K*TYVTPR	RS9_MOUSE 40S ribosomal protein S9 OS=Mus musculus OX=10090 GN=Rps9 PE=1 SV=3	1.11917	0.317165
Rpl10a_K56	Rpl10a	LK*STPR	RL10A_MOUSE 60S ribosomal protein L10a OS=Mus musculus OX=10090 GN=Rpl10a PE=1 SV=3	1.11813	0.261826
Ncl_K621	Ncl	GFGFVDFNSEEDAK*AAK	NUCL_MOUSE Nucleolin OS=Mus musculus OX=10090 GN=Ncl PE=1 SV=2	1.1175	0.215113
Myh9_K1392	Myh9	LQK*DLEGLSQR	MYH9_MOUSE Myosin-9 OS=Mus musculus OX=10090 GN=Myh9 PE=1 SV=4	1.1175	0.280533
Myh9_K1274	Myh9	TELADK*VTK	MYH9_MOUSE Myosin-9 OS=Mus musculus OX=10090 GN=Myh9 PE=1 SV=4	1.1175	0.304464
H3c1_K24	H3c1	KQLATK*AAR QLATK*AAR	H31_MOUSE Histone H3.1 OS=Mus musculus OX=10090 GN=H3c1 PE=1 SV=2	1.1175	0.475601
Coro1a_K132	Coro1a	EPVITLEGHTK*R	COR1A_MOUSE Coronin-1A OS=Mus musculus OX=10090 GN=Coro1a PE=1 SV=5	1.117	0.610063
Dglucy_K91	Dglucy	TICPQLQK*YK	GLUCM_MOUSE D-glutamate cyclase, mitochondrial OS=Mus musculus OX=10090 GN=Dglucy PE=1 SV=1	1.11667	0.129607
Tsn_K219	Tsn	GFNK*ETAAACGEK	TSN_MOUSE Translin OS=Mus musculus OX=10090 GN=Tsn PE=1 SV=1	1.11667	0.430813
Eif2s1_K190	Eif2s1	LTPQAVK*IR	IF2A_MOUSE Eukaryotic translation initiation factor 2 subunit 1 OS=Mus musculus OX=10090 GN=Eif2s1 PE=1 SV=3	1.11667	0.661468
Lyar_K66	Lyar	GYEAK*THK	LYAR_MOUSE Cell growth-regulating nucleolar protein OS=Mus musculus OX=10090 GN=Lyar PE=1 SV=2	1.11667	0.783069
Eef2_K572	Eef2	K*SDPVVSYR	EF2_MOUSE Elongation factor 2 OS=Mus musculus OX=10090 GN=Eef2 PE=1 SV=2	1.11625	0.391183
Eef1b_K133	Eef1b	AKK*PAVVAK K*PAVVAK	EF1B_MOUSE Elongation factor 1-beta OS=Mus musculus OX=10090 GN=Eef1b PE=1 SV=5	1.11562	0.276374
Prdx6_K56	Prdx6	AAK*LAPEFAK	PRDX6_MOUSE Peroxiredoxin-6 OS=Mus musculus OX=10090 GN=Prdx6 PE=1 SV=3	1.115	0.027239
Abcf1_K535	Abcf1	MYQQK*QK	ABCF1_MOUSE ATP-binding cassette sub-family F member 1 OS=Mus musculus OX=10090 GN=Abcf1 PE=1 SV=1	1.115
Fus_K305	Fus	QIGIIK*TNK	FUS_MOUSE RNA-binding protein FUS OS=Mus musculus OX=10090 GN=Fus PE=1 SV=1	1.115
Tagln2_K156	Tagln2	SK*ENPR	TAGL2_MOUSE Transgelin-2 OS=Mus musculus OX=10090 GN=Tagln2 PE=1 SV=4	1.115	0.0824869
Actb_K291	Actb	K*DLYANTVLSGGTTMYPGIADR	ACTB_MOUSE Actin, cytoplasmic 1 OS=Mus musculus OX=10090 GN=Actb PE=1 SV=1	1.115	0.426967
Stip1_K523	Stip1	DPQALSEHLK*NPVIAQK	STIP1_MOUSE Stress-induced-phosphoprotein 1 OS=Mus musculus OX=10090 GN=Stip1 PE=1 SV=1	1.115	0.747847
Hspa9_K138	Hspa9	DTK*NVPFK	GRP75_MOUSE Stress-70 protein, mitochondrial OS=Mus musculus OX=10090 GN=Hspa9 PE=1 SV=3	1.114	0.356721
Thumpd3_K239	Thumpd3	AGEK*HCFTSNEAAR	THUM3_MOUSE THUMP domain-containing protein 3 OS=Mus musculus OX=10090 GN=Thumpd3 PE=1 SV=1	1.11375	0.0922622
Snrpa1_K172	Snrpa1	GAQLAK*DIAR	RU2A_MOUSE U2 small nuclear ribonucleoprotein A' OS=Mus musculus OX=10090 GN=Snrpa1 PE=1 SV=2	1.11333	0.0822448
Lcp1_K82	Lcp1	VFHGLK*STEVAK	PLSL_MOUSE Plastin-2 OS=Mus musculus OX=10090 GN=Lcp1 PE=1 SV=4	1.11312	0.485447
Prmt8_K168	Prmt8	GK*VEEVELPVEK	ANM8_MOUSE Protein arginine N-methyltransferase 8 OS=Mus musculus OX=10090 GN=Prmt8 PE=1 SV=2	1.113	0.33351
Spcs3_K49	Spcs3	IMLK*NVEDFTGPR	SPCS3_MOUSE Signal peptidase complex subunit 3 OS=Mus musculus OX=10090 GN=Spcs3 PE=1 SV=1	1.1125	0.623478
Hnrnpa2b1_K17	Hnrnpa2b1	EK*EQFR	ROA2_MOUSE Heterogeneous nuclear ribonucleoproteins A2/B1 OS=Mus musculus OX=10090 GN=Hnrnpa2b1 PE=1 SV=2	1.1125	0.25433
Rab5c_K18	Rab5c	PNGPAAGNK*ICQFK	RAB5C_MOUSE Ras-related protein Rab-5C OS=Mus musculus OX=10090 GN=Rab5c PE=1 SV=2	1.1125	0.561726
Pfkp_K404	Pfkp	LPDEK*IVK	PFKAP_MOUSE ATP-dependent 6-phosphofructokinase, platelet type OS=Mus musculus OX=10090 GN=Pfkp PE=1 SV=1	1.11167	0.558052
Hspa8_K257	Hspa8	DISENK*R LSENK*R	HSP7C_MOUSE Heat shock cognate 71 kDa protein OS=Mus musculus OX=10090 GN=Hspa8 PE=1 SV=1	1.11167	0.634442
Eif5a_K27	Eif5a	K*NGFVVLK	IF5A1_MOUSE Eukaryotic translation initiation factor 5A-1 OS=Mus musculus OX=10090 GN=Eif5a PE=1 SV=2	1.111	0.41275
Ybx1_K299	Ybx1	RPENPKPQDGK*ETK	YBOX1_MOUSE Y-box-binding protein 1 OS=Mus musculus OX=10090 GN=Ybx1 PE=1 SV=3	1.11
Flna_K493	Flna	GLQPK*GVR	FLNA_MOUSE Filamin-A OS=Mus musculus OX=10090 GN=Flna PE=1 SV=5	1.11
Drg2_K161	Drg2	SLLEK*ELESVGIR	DRG2_MOUSE Developmentally-regulated GTP-binding protein 2 OS=Mus musculus OX=10090 GN=Drg2 PE=1 SV=1	1.11
Otulin_K176	Otulin	LGLK*FDGK	OTUL_MOUSE Ubiquitin thioesterase otulin OS=Mus musculus OX=10090 GN=Otulin PE=1 SV=1	1.11
Arpc1b_K308	Arpc1b	K*ASSEGGAATGAGLDSLHK	ARC1B_MOUSE Actin-related protein 2/3 complex subunit 1B OS=Mus musculus OX=10090 GN=Arpc1b PE=1 SV=4	1.11
Vbp1_K69	Vbp1	FMELNLAQK*K	PFD3_MOUSE Prefoldin subunit 3 OS=Mus musculus OX=10090 GN=Vbp1 PE=1 SV=2	1.11
Hdac2_K439	Hdac2	NVADHK*K	HDAC2_MOUSE Histone deacetylase 2 OS=Mus musculus OX=10090 GN=Hdac2 PE=1 SV=1	1.11
Ddx52_K132	Ddx52	K*LEHLR	DDX52_MOUSE Probable ATP-dependent RNA helicase DDX52 OS=Mus musculus OX=10090 GN=Ddx52 PE=2 SV=2	1.11
Arpc1b_K307	Arpc1b	FQNLDK*K	ARC1B_MOUSE Actin-related protein 2/3 complex subunit 1B OS=Mus musculus OX=10090 GN=Arpc1b PE=1 SV=4	1.11
Ube2v1_K68	Ube2v1	IYSLK*IECGPK	UB2V1_MOUSE Ubiquitin-conjugating enzyme E2 variant 1 OS=Mus musculus OX=10090 GN=Ube2v1 PE=1 SV=1	1.11
Rps6_K30	Rps6	TFYEK*R	RS6_MOUSE 40S ribosomal protein S6 OS=Mus musculus OX=10090 GN=Rps6 PE=1 SV=1	1.11	0.460356
Rpl6_K18	Rpl6	K*AGSDAAASRPR	RL6_MOUSE 60S ribosomal protein L6 OS=Mus musculus OX=10090 GN=Rpl6 PE=1 SV=3	1.11	0.665905
Ywhaz_K68	Ywhaz	VVSSIEQK*TEGAEK	1433Z_MOUSE 14-3-3 protein zeta/delta OS=Mus musculus OX=10090 GN=Ywhaz PE=1 SV=1	1.11	0.256132
Myh9_K1240	Myh9	ALLQGK*GDSEHK	MYH9_MOUSE Myosin-9 OS=Mus musculus OX=10090 GN=Myh9 PE=1 SV=4	1.11	0.382252
Cdc37_K241	Cdc37	QFFTK*IK	CDC37_MOUSE Hsp90 co-chaperone Cdc37 OS=Mus musculus OX=10090 GN=Cdc37 PE=1 SV=1	1.11	0.473182
Dars1_K9	Dars1	K*GQEKPR	SYDC_MOUSE Aspartate--tRNA ligase, cytoplasmic OS=Mus musculus OX=10090 GN=Dars1 PE=1 SV=2	1.11	0.616572
Ywhag_K142	Ywhag	YLAEVATGEK*R	1433G_MOUSE 14-3-3 protein gamma OS=Mus musculus OX=10090 GN=Ywhag PE=1 SV=2	1.109	0.207845
Cct3_K353	Cct3	IVSRPEELREDDVGTGAGLLEIK*K EDDVGTGAGLLEIK*K	TCPG_MOUSE T-complex protein 1 subunit gamma OS=Mus musculus OX=10090 GN=Cct3 PE=1 SV=1	1.10875	0.26994
Hspd1_K396	Hspd1	LAK*LSDGVAVLK	CH60_MOUSE 60 kDa heat shock protein, mitochondrial OS=Mus musculus OX=10090 GN=Hspd1 PE=1 SV=1	1.10875	0.360318
Rps13_K43	Rps13	K*GLTPSQIGVILR	RS13_MOUSE 40S ribosomal protein S13 OS=Mus musculus OX=10090 GN=Rps13 PE=1 SV=2	1.10857	0.257025
Hnrnpu_K602	Hnrnpu	KAEVEGK*DLPEHAVLK	HNRPU_MOUSE Heterogeneous nuclear ribonucleoprotein U OS=Mus musculus OX=10090 GN=Hnrnpu PE=1 SV=1	1.1075	0.435968
Cse1l_K17	Cse1l	K*TLDPDPAIR	XPO2_MOUSE Exportin-2 OS=Mus musculus OX=10090 GN=Cse1l PE=1 SV=1	1.10688	0.360943
Smc2_K963	Smc2	TNNPK*EAGQR	SMC2_MOUSE Structural maintenance of chromosomes protein 2 OS=Mus musculus OX=10090 GN=Smc2 PE=1 SV=2	1.10667	0.371584
Rps5_K201	Rps5	VAK*SNR	RS5_MOUSE 40S ribosomal protein S5 OS=Mus musculus OX=10090 GN=Rps5 PE=1 SV=3	1.10667	0.415646
Rps4x_K120	Rps4x	ITPEEAK*YK	RS4X_MOUSE 40S ribosomal protein S4, X isoform OS=Mus musculus OX=10090 GN=Rps4x PE=1 SV=2	1.10667	0.506229
Gmps_K412	Gmps	VIEPLK*DFHKDEVR	GUAA_MOUSE GMP synthase [glutamine-hydrolyzing] OS=Mus musculus OX=10090 GN=Gmps PE=1 SV=2	1.10667	0.528288
Tln1_K2115	Tln1	VGDDPAVWQLK*NSAK	TLN1_MOUSE Talin-1 OS=Mus musculus OX=10090 GN=Tln1 PE=1 SV=2	1.10667	0.684725
Eif3l_K397	Eif3l	YGDK*MLR	EIF3L_MOUSE Eukaryotic translation initiation factor 3 subunit L OS=Mus musculus OX=10090 GN=Eif3l PE=1 SV=1	1.10563	0.202069
Ncl_K70	Ncl	VVVSQTK*K	NUCL_MOUSE Nucleolin OS=Mus musculus OX=10090 GN=Ncl PE=1 SV=2	1.105	0.500909
Znf207_K100	Znf207	LLEQK*TQESQK	ZN207_MOUSE BUB3-interacting and GLEBS motif-containing protein ZNF207 OS=Mus musculus OX=10090 GN=Znf207 PE=1 SV=1	1.105	0.14877
Rsl1d1_K38	Rsl1d1	K*AVEVISNR	RL1D1_MOUSE Ribosomal L1 domain-containing protein 1 OS=Mus musculus OX=10090 GN=Rsl1d1 PE=1 SV=1	1.105	0.27793
Cct5_K150	Cct5	IAIQHLDK*ISDK	TCPE_MOUSE T-complex protein 1 subunit epsilon OS=Mus musculus OX=10090 GN=Cct5 PE=1 SV=1	1.105	0.330204
Hdlbp_K1071	Hdlbp	K*GAVITQIR	VIGLN_MOUSE Vigilin OS=Mus musculus OX=10090 GN=Hdlbp PE=1 SV=1	1.105	0.499999
Txn_K8	Txn	LIESK*EAFQEALAAAGDK	THIO_MOUSE Thioredoxin OS=Mus musculus OX=10090 GN=Txn PE=1 SV=3	1.105	0.751332
H1-4_K46	H1-4	TSGPPVSELITK*AVAASK	H14_MOUSE Histone H1.4 OS=Mus musculus OX=10090 GN=H1-4 PE=1 SV=2	1.10375	0.343292
Mybbp1a_K200	Mybbp1a	VLK*GNMK	MBB1A_MOUSE Myb-binding protein 1A OS=Mus musculus OX=10090 GN=Mybbp1a PE=1 SV=2	1.10375	0.452236
Ncl_K125	Ncl	K*GAATPAK	NUCL_MOUSE Nucleolin OS=Mus musculus OX=10090 GN=Ncl PE=1 SV=2	1.10357	0.534755
Hnrnpu_K21	Hnrnpu	VSELKEELK*K	HNRPU_MOUSE Heterogeneous nuclear ribonucleoprotein U OS=Mus musculus OX=10090 GN=Hnrnpu PE=1 SV=1	1.10333	0.170003
Slc25a13_K409	Slc25a13	AIK*LTVNDFVR	CMC2_MOUSE Calcium-binding mitochondrial carrier protein Aralar2 OS=Mus musculus OX=10090 GN=Slc25a13 PE=1 SV=1	1.10333	0.41405
Ywhaz_K157	Ywhaz	GIVDQSQQAYQEAFEISK*K	1433Z_MOUSE 14-3-3 protein zeta/delta OS=Mus musculus OX=10090 GN=Ywhaz PE=1 SV=1	1.10333	0.261275
Pabpc1_K78	Pabpc1	ALDTMNFDVIK*GKPVR	PABP1_MOUSE Polyadenylate-binding protein 1 OS=Mus musculus OX=10090 GN=Pabpc1 PE=1 SV=2	1.10333	0.362819
Nsa2_K180	Nsa2	K*AHVTHPELK	NSA2_MOUSE Ribosome biogenesis protein NSA2 homolog OS=Mus musculus OX=10090 GN=Nsa2 PE=2 SV=1	1.10333	0.500714
H4c1_K32	H4c1	DNIQGITK*PAIR	H4_MOUSE Histone H4 OS=Mus musculus OX=10090 GN=H4c1 PE=1 SV=2	1.103	0.383593
Atp5mg_K61	Atp5mg	IIQSAK*TGSFK	ATP5L_MOUSE ATP synthase subunit g, mitochondrial OS=Mus musculus OX=10090 GN=Atp5mg PE=1 SV=1	1.1025	0.636384
Cct7_K145	Cct7	K*QDKVEQR	TCPH_MOUSE T-complex protein 1 subunit eta OS=Mus musculus OX=10090 GN=Cct7 PE=1 SV=1	1.1025	0.890037
Eef1a1_K244	Eef1a1	KDGSASGTTLLEALDCILPPTRPTDK*PLR	EF1A1_MOUSE Elongation factor 1-alpha 1 OS=Mus musculus OX=10090 GN=Eef1a1 PE=1 SV=3	1.10167	0.657168
Cfl1_K44	Cfl1	AVLFCLSEDK*K	COF1_MOUSE Cofilin-1 OS=Mus musculus OX=10090 GN=Cfl1 PE=1 SV=3	1.10167	0.22945
Hmgb1_K30	Hmgb1	K*HPDASVNFSEFSK	HMGB1_MOUSE High mobility group protein B1 OS=Mus musculus OX=10090 GN=Hmgb1 PE=1 SV=2	1.10062	0.191522
Tuba1b_K336	Tuba1b	DVNAAIATIK*TK	TBA1B_MOUSE Tubulin alpha-1B chain OS=Mus musculus OX=10090 GN=Tuba1b PE=1 SV=2	1.1
Pabpc1_K284	Pabpc1	KFEQMK*QDR	PABP1_MOUSE Polyadenylate-binding protein 1 OS=Mus musculus OX=10090 GN=Pabpc1 PE=1 SV=2	1.1
Alyref_K80	Alyref	PK*QLPDK	THOC4_MOUSE THO complex subunit 4 OS=Mus musculus OX=10090 GN=Alyref PE=1 SV=3	1.1
Zyx_K166	Zyx	NDPFK*AR	ZYX_MOUSE Zyxin OS=Mus musculus OX=10090 GN=Zyx PE=1 SV=2	1.1
Sec23ip_K691	Sec23ip	K*IANFVK	S23IP_MOUSE SEC23-interacting protein OS=Mus musculus OX=10090 GN=Sec23ip PE=1 SV=2	1.1
Cfl1_K152	Cfl1	CTLAEK*LGGSAVISLEGKPL	COF1_MOUSE Cofilin-1 OS=Mus musculus OX=10090 GN=Cfl1 PE=1 SV=3	1.1
Samhd1_K653	Samhd1	VK*TCLK	SAMH1_MOUSE Deoxynucleoside triphosphate triphosphohydrolase SAMHD1 OS=Mus musculus OX=10090 GN=Samhd1 PE=1 SV=3	1.1
Psma7_K166	Psma7	GAK*SVR	PSA7_MOUSE Proteasome subunit alpha type-7 OS=Mus musculus OX=10090 GN=Psma7 PE=1 SV=1	1.1
Hirip3_K526	Hirip3	ALK*LQR	HIRP3_MOUSE HIRA-interacting protein 3 OS=Mus musculus OX=10090 GN=Hirip3 PE=1 SV=1	1.1
Supt16h_K497	Supt16h	LTEQK*GEQQIQK	SP16H_MOUSE FACT complex subunit SPT16 OS=Mus musculus OX=10090 GN=Supt16h PE=1 SV=2	1.1
Copa_K480	Copa	DADSITLFDVQQK*R	COPA_MOUSE Coatomer subunit alpha OS=Mus musculus OX=10090 GN=Copa PE=1 SV=2	1.1
Hnrnpu_K181	Hnrnpu	EAAGK*SSGPTSLFAVTVAPPGAR	HNRPU_MOUSE Heterogeneous nuclear ribonucleoprotein U OS=Mus musculus OX=10090 GN=Hnrnpu PE=1 SV=1	1.1
Ncl_K288	Ncl	EMTK*QK	NUCL_MOUSE Nucleolin OS=Mus musculus OX=10090 GN=Ncl PE=1 SV=2	1.1
Srsf5_K167	Srsf5	LSGK*EINGR	SRSF5_MOUSE Serine/arginine-rich splicing factor 5 OS=Mus musculus OX=10090 GN=Srsf5 PE=1 SV=2	1.1
Dnajc9_K198	Dnajc9	AQEEAK*EAELSR	DNJC9_MOUSE DnaJ homolog subfamily C member 9 OS=Mus musculus OX=10090 GN=Dnajc9 PE=1 SV=2	1.1
Smarcd3_K189	Smarcd3	VEGK*LLDDPSK	SMRD3_MOUSE SWI/SNF-related matrix-associated actin-dependent regulator of chromatin subfamily D member 3 OS=Mus musculus OX=10090 GN=Smarcd3 PE=1 SV=2	1.1
Vdac1_K287	Vdac1	NVNAGGHK*LGLGLEFQA	VDAC1_MOUSE Voltage-dependent anion-selective channel protein 1 OS=Mus musculus OX=10090 GN=Vdac1 PE=1 SV=3	1.1
Llph_K59	Llph	QEK*MQCEEGR	LLPH_MOUSE Protein LLP homolog OS=Mus musculus OX=10090 GN=Llph PE=1 SV=1	1.1	0.499999
Hspa8_K112	Hspa8	GETK*SFYPEEVSSMVLTK	HSP7C_MOUSE Heat shock cognate 71 kDa protein OS=Mus musculus OX=10090 GN=Hspa8 PE=1 SV=1	1.1	0.597741
Canx_K218	Canx	TGVYEEK*HAK	CALX_MOUSE Calnexin OS=Mus musculus OX=10090 GN=Canx PE=1 SV=1	1.1	0.625666
Uba2_K611	Uba2	K*LEENEAASTK	SAE2_MOUSE SUMO-activating enzyme subunit 2 OS=Mus musculus OX=10090 GN=Uba2 PE=1 SV=1	1.1	0.625666
Stat1_K138	Stat1	FNQAQEGNIQNTVMLDK*QK	STAT1_MOUSE Signal transducer and activator of transcription 1 OS=Mus musculus OX=10090 GN=Stat1 PE=1 SV=1	1.1	0.704833
Ncl_K451	Ncl	NLEEK*QGAEIDGR	NUCL_MOUSE Nucleolin OS=Mus musculus OX=10090 GN=Ncl PE=1 SV=2	1.1	0.757762
Pgam1_K228	Pgam1	NLKPIK*PMQFLGDEETVR	PGAM1_MOUSE Phosphoglycerate mutase 1 OS=Mus musculus OX=10090 GN=Pgam1 PE=1 SV=3	1.1	0.76625
Opa1_K228	Opa1	IDQLQEELLHTQLK*YQR	OPA1_MOUSE Dynamin-like 120 kDa protein, mitochondrial OS=Mus musculus OX=10090 GN=Opa1 PE=1 SV=1	1.1	0.788604
Hsph1_K257	Hsph1	LDAK*SK	HS105_MOUSE Heat shock protein 105 kDa OS=Mus musculus OX=10090 GN=Hsph1 PE=1 SV=2	1.1	0.389874
Gabarap_K20	Gabarap	SEGEK*IR	GBRAP_MOUSE Gamma-aminobutyric acid receptor-associated protein OS=Mus musculus OX=10090 GN=Gabarap PE=1 SV=2	1.1	0.394403
Serbp1_K319	Serbp1	KPNEGADGQWK*K	PAIRB_MOUSE Plasminogen activator inhibitor 1 RNA-binding protein OS=Mus musculus OX=10090 GN=Serbp1 PE=1 SV=2	1.1	0.627495
Eif3d_K412	Eif3d	QK*LDSQR	EIF3D_MOUSE Eukaryotic translation initiation factor 3 subunit D OS=Mus musculus OX=10090 GN=Eif3d PE=1 SV=2	1.1	0.655786
Hadha_K411	Hadha	GLNDK*VK	ECHA_MOUSE Trifunctional enzyme subunit alpha, mitochondrial OS=Mus musculus OX=10090 GN=Hadha PE=1 SV=1	1.1	0.881279
Ncl_K514	Ncl	ATFIK*VPQNPHGK	NUCL_MOUSE Nucleolin OS=Mus musculus OX=10090 GN=Ncl PE=1 SV=2	1.09938	0.0755351
Msn_K162	Msn	VLEQHK*LNK	MOES_MOUSE Moesin OS=Mus musculus OX=10090 GN=Msn PE=1 SV=3	1.09929	0.472609
Ywhae_K142	Ywhae	K*EAAENSLVAYK	1433E_MOUSE 14-3-3 protein epsilon OS=Mus musculus OX=10090 GN=Ywhae PE=1 SV=1	1.09929	0.474132
Rpl11_K85	Rpl11	AEEILEK*GLK	RL11_MOUSE 60S ribosomal protein L11 OS=Mus musculus OX=10090 GN=Rpl11 PE=1 SV=4	1.09857	0.397495
Rps4x_K233	Rps4x	GNK*PWISLPR	RS4X_MOUSE 40S ribosomal protein S4, X isoform OS=Mus musculus OX=10090 GN=Rps4x PE=1 SV=2	1.09833	0.376048
Psmd7_K214	Psmd7	SYLEK*VASGK	PSMD7_MOUSE 26S proteasome non-ATPase regulatory subunit 7 OS=Mus musculus OX=10090 GN=Psmd7 PE=1 SV=2	1.09833	0.596819
Hmgb2_K30	Hmgb2	K*HPDSSVNFAEFSK	HMGB2_MOUSE High mobility group protein B2 OS=Mus musculus OX=10090 GN=Hmgb2 PE=1 SV=3	1.09813	0.436853
Gapdh_K59	Gapdh	FNGTVK*AENGK	G3P_MOUSE Glyceraldehyde-3-phosphate dehydrogenase OS=Mus musculus OX=10090 GN=Gapdh PE=1 SV=2	1.0975	0.38855
Ssb_K208	Ssb	AK*QEHEGR	LA_MOUSE Lupus La protein homolog OS=Mus musculus OX=10090 GN=Ssb PE=1 SV=1	1.0975	0.39681
Hsp90ab1_K438	Hsp90ab1	NLK*LGIHEDSTNR	HS90B_MOUSE Heat shock protein HSP 90-beta OS=Mus musculus OX=10090 GN=Hsp90ab1 PE=1 SV=3	1.0975	0.742238
Eef2_K445	Eef2	KEDLYLK*PIQR EDLYLK*PIQR	EF2_MOUSE Elongation factor 2 OS=Mus musculus OX=10090 GN=Eef2 PE=1 SV=2	1.09571	0.334014
Ncl_K230	Ncl	TPAK*VVPMK	NUCL_MOUSE Nucleolin OS=Mus musculus OX=10090 GN=Ncl PE=1 SV=2	1.09563	0.0369571
Cndp2_K302	Cndp2	K*DILMHR	CNDP2_MOUSE Cytosolic non-specific dipeptidase OS=Mus musculus OX=10090 GN=Cndp2 PE=1 SV=1	1.095	0.163782
Eef1g_K132	Eef1g	QATENAK*EEVKR	EF1G_MOUSE Elongation factor 1-gamma OS=Mus musculus OX=10090 GN=Eef1g PE=1 SV=3	1.095	0.0560505
Aimp2_K70	Aimp2	LYELK*AAVDGLSK	AIMP2_MOUSE Aminoacyl tRNA synthase complex-interacting multifunctional protein 2 OS=Mus musculus OX=10090 GN=Aimp2 PE=1 SV=2	1.095	0.104364
Myh9_K1024	Myh9	NK*HEAMITDLEER	MYH9_MOUSE Myosin-9 OS=Mus musculus OX=10090 GN=Myh9 PE=1 SV=4	1.095	0.333914
Fdps_K31	Fdps	VLTEK*ELGHPEIGDAIAR	FPPS_MOUSE Farnesyl pyrophosphate synthase OS=Mus musculus OX=10090 GN=Fdps PE=1 SV=1	1.095	0.358752
Gapdh_K261	Gapdh	VVK*QASEGPLK	G3P_MOUSE Glyceraldehyde-3-phosphate dehydrogenase OS=Mus musculus OX=10090 GN=Gapdh PE=1 SV=2	1.095	0.428026
Clasp1_K870	Clasp1	K*EGLLGLQNLLK	CLAP1_MOUSE CLIP-associating protein 1 OS=Mus musculus OX=10090 GN=Clasp1 PE=1 SV=2	1.095	0.60962
Erp29_K228	Erp29	IGK*LIENK	ERP29_MOUSE Endoplasmic reticulum resident protein 29 OS=Mus musculus OX=10090 GN=Erp29 PE=1 SV=2	1.095	0.649953
H1-2_K110	H1-2	K*AASGEAKPQAK	H12_MOUSE Histone H1.2 OS=Mus musculus OX=10090 GN=H1-2 PE=1 SV=2	1.095	0.695438
Hcls1_K241	Hcls1	AK*FESLAEEK	HCLS1_MOUSE Hematopoietic lineage cell-specific protein OS=Mus musculus OX=10090 GN=Hcls1 PE=1 SV=2	1.095	0.723737
Hspa5_K554	Hspa5	FAEEDK*K	BIP_MOUSE Endoplasmic reticulum chaperone BiP OS=Mus musculus OX=10090 GN=Hspa5 PE=1 SV=3	1.095	0.780864
Phb_K202	Phb	FVVEK*AEQQK	PHB_MOUSE Prohibitin OS=Mus musculus OX=10090 GN=Phb PE=1 SV=1	1.09437	0.264817
Serbp1_K320	Serbp1	K*GFVLHK	PAIRB_MOUSE Plasminogen activator inhibitor 1 RNA-binding protein OS=Mus musculus OX=10090 GN=Serbp1 PE=1 SV=2	1.09429	0.364333
H1-5_K52	H1-5	AVSASK*ER	H15_MOUSE Histone H1.5 OS=Mus musculus OX=10090 GN=H1-5 PE=1 SV=2	1.094	0.612794
Skap2_K125	Skap2	AGYLEK*R	SKAP2_MOUSE Src kinase-associated phosphoprotein 2 OS=Mus musculus OX=10090 GN=Skap2 PE=1 SV=2	1.09333	0.639422
env_K137	env	LK*LDQTTHK	ENV_MLVMS Envelope glycoprotein OS=Moloney murine leukemia virus (isolate Shinnick) OX=928306 GN=env PE=1 SV=1	1.09286	0.499283
Sqstm1_K13	Sqstm1	YLLGK*EEATR AYLLGK*EEATR	SQSTM_MOUSE Sequestosome-1 OS=Mus musculus OX=10090 GN=Sqstm1 PE=1 SV=1	1.0925	0.418865
Coro1c_K419	Coro1c	K*SELSCAPK	COR1C_MOUSE Coronin-1C OS=Mus musculus OX=10090 GN=Coro1c PE=1 SV=2	1.0925	0.370326
Gapdh_K64	Gapdh	AENGK*LVINGK	G3P_MOUSE Glyceraldehyde-3-phosphate dehydrogenase OS=Mus musculus OX=10090 GN=Gapdh PE=1 SV=2	1.09167	0.755686
Caprin1_K232	Caprin1	ALK*EIVER	CAPR1_MOUSE Caprin-1 OS=Mus musculus OX=10090 GN=Caprin1 PE=1 SV=2	1.09125	0.230221
Cd72_K14	Cd72	FVK*VPLK	CD72_MOUSE B-cell differentiation antigen CD72 OS=Mus musculus OX=10090 GN=Cd72 PE=1 SV=2	1.09125	0.543119
Uqcrc2_K98	Uqcrc2	GASSFK*ITR	QCR2_MOUSE Cytochrome b-c1 complex subunit 2, mitochondrial OS=Mus musculus OX=10090 GN=Uqcrc2 PE=1 SV=1	1.09
Afdn_K510	Afdn	FVDPIQDHVLSK*R	AFAD_MOUSE Afadin OS=Mus musculus OX=10090 GN=Afdn PE=1 SV=3	1.09
Trap1_K98	Trap1	K*LLDIVAR	TRAP1_MOUSE Heat shock protein 75 kDa, mitochondrial OS=Mus musculus OX=10090 GN=Trap1 PE=1 SV=1	1.09
Smc1a_K190	Smc1a	K*NIAAER	SMC1A_MOUSE Structural maintenance of chromosomes protein 1A OS=Mus musculus OX=10090 GN=Smc1a PE=1 SV=4	1.09
Smc4_K1007	Smc4	VIQENEHALQK*DALSIK	SMC4_MOUSE Structural maintenance of chromosomes protein 4 OS=Mus musculus OX=10090 GN=Smc4 PE=1 SV=1	1.09
Cct2_K135	Cct2	EATK*AAR	TCPB_MOUSE T-complex protein 1 subunit beta OS=Mus musculus OX=10090 GN=Cct2 PE=1 SV=4	1.09
Sec61a1_K392	Sec61a1	DVAK*QLK	S61A1_MOUSE Protein transport protein Sec61 subunit alpha isoform 1 OS=Mus musculus OX=10090 GN=Sec61a1 PE=1 SV=2	1.09
Igf2r_K991	Igf2r	DLK*DLR	MPRI_MOUSE Cation-independent mannose-6-phosphate receptor OS=Mus musculus OX=10090 GN=Igf2r PE=1 SV=1	1.09
Atp5f1a_K498	Atp5f1a	GYLDK*LEPSK	ATPA_MOUSE ATP synthase subunit alpha, mitochondrial OS=Mus musculus OX=10090 GN=Atp5f1a PE=1 SV=1	1.09
Pum2_K747	Pum2	FIQQK*LER	PUM2_MOUSE Pumilio homolog 2 OS=Mus musculus OX=10090 GN=Pum2 PE=1 SV=2	1.09
Trim28_K779	Trim28	LTEDK*ADVQSIIGLQR	TIF1B_MOUSE Transcription intermediary factor 1-beta OS=Mus musculus OX=10090 GN=Trim28 PE=1 SV=3	1.09
Blvra_K146	Blvra	ELLK*GSLR	BIEA_MOUSE Biliverdin reductase A OS=Mus musculus OX=10090 GN=Blvra PE=1 SV=1	1.09
P4hb_K108	P4hb	FFK*NGDTASPK	PDIA1_MOUSE Protein disulfide-isomerase OS=Mus musculus OX=10090 GN=P4hb PE=1 SV=2	1.09	0.129929
Cstb_K78	Cstb	VFQPLPHENK*PLTLSSYQTNK	CYTB_MOUSE Cystatin-B OS=Mus musculus OX=10090 GN=Cstb PE=1 SV=1	1.09	0.139154
Ncl_K102	Ncl	NITPAK*VIPTPGK	NUCL_MOUSE Nucleolin OS=Mus musculus OX=10090 GN=Ncl PE=1 SV=2	1.09	0.225919
Acat1_K171	Acat1	GATPYGGVK*LEDLIVK	THIL_MOUSE Acetyl-CoA acetyltransferase, mitochondrial OS=Mus musculus OX=10090 GN=Acat1 PE=1 SV=1	1.09	0.309914
Hsp90ab1_K435	Hsp90ab1	FYEAFSK*NLK	HS90B_MOUSE Heat shock protein HSP 90-beta OS=Mus musculus OX=10090 GN=Hsp90ab1 PE=1 SV=3	1.09	0.595949
Pgk1_K75	Pgk1	SVVLMSHLGRPDGVPMPDK*YSLEPVAAELK	PGK1_MOUSE Phosphoglycerate kinase 1 OS=Mus musculus OX=10090 GN=Pgk1 PE=1 SV=4	1.09	0.752789
Oas3_K417	Oas3	AAHPK*TVQEAALDSISSHVR	OAS3_MOUSE 2'-5'-oligoadenylate synthase 3 OS=Mus musculus OX=10090 GN=Oas3 PE=1 SV=1	1.09	0.762549
Ranbp2_K1962	Ranbp2	LEQLAAK*FK	RBP2_MOUSE E3 SUMO-protein ligase RanBP2 OS=Mus musculus OX=10090 GN=Ranbp2 PE=1 SV=2	1.09	0.802012
Cdc37_K102	Cdc37	SWEQK*LEDMRK SWEQK*LEDMR	CDC37_MOUSE Hsp90 co-chaperone Cdc37 OS=Mus musculus OX=10090 GN=Cdc37 PE=1 SV=1	1.09	0.224688
Maco1_K461	Maco1	LK*AEQEAR	MACOI_MOUSE Macoilin OS=Mus musculus OX=10090 GN=Maco1 PE=1 SV=1	1.09	0.266237
Rbm28_K729	Rbm28	FNQLVEQYK*QK	RBM28_MOUSE RNA-binding protein 28 OS=Mus musculus OX=10090 GN=Rbm28 PE=1 SV=4	1.09	0.37433
Nono_K200	Nono	GIVEFSGK*PAAR	NONO_MOUSE Non-POU domain-containing octamer-binding protein OS=Mus musculus OX=10090 GN=Nono PE=1 SV=3	1.09	0.420831
Eif3a_K694	Eif3a	K*IDYFER	EIF3A_MOUSE Eukaryotic translation initiation factor 3 subunit A OS=Mus musculus OX=10090 GN=Eif3a PE=1 SV=5	1.08875	0.207477
Eef1a1_K44	Eef1a1	FEK*EAAEMGK	EF1A1_MOUSE Elongation factor 1-alpha 1 OS=Mus musculus OX=10090 GN=Eef1a1 PE=1 SV=3	1.0875	0.206825
Pdcd6ip_K486	Pdcd6ip	TPSNDLYK*PLR	PDC6I_MOUSE Programmed cell death 6-interacting protein OS=Mus musculus OX=10090 GN=Pdcd6ip PE=1 SV=3	1.0875	0.540075
Lmna_K180	Lmna	LEAALGEAK*K	LMNA_MOUSE Prelamin-A/C OS=Mus musculus OX=10090 GN=Lmna PE=1 SV=2	1.0875	0.241146
Srsf1_K193	Srsf1	VK*VDGPR	SRSF1_MOUSE Serine/arginine-rich splicing factor 1 OS=Mus musculus OX=10090 GN=Srsf1 PE=1 SV=3	1.08688	0.303877
Eef1a1_K273	Eef1a1	VETGVLK*PGMVVTFAPVNVTTEVK	EF1A1_MOUSE Elongation factor 1-alpha 1 OS=Mus musculus OX=10090 GN=Eef1a1 PE=1 SV=3	1.08667	0.327336
Psma2_K53	Psma2	QK*SILYDER	PSA2_MOUSE Proteasome subunit alpha type-2 OS=Mus musculus OX=10090 GN=Psma2 PE=1 SV=3	1.08667	0.558224
Mcmbp_K328	Mcmbp	LQHINPLLPTCLNK*EESR	MCMBP_MOUSE Mini-chromosome maintenance complex-binding protein OS=Mus musculus OX=10090 GN=Mcmbp PE=1 SV=1	1.08667	0.668783
Tln1_K1221	Tln1	AVGDASK*R	TLN1_MOUSE Talin-1 OS=Mus musculus OX=10090 GN=Tln1 PE=1 SV=2	1.08625	0.553794
Rbbp7_K101	Rbbp7	VHIPNDDAQFDASHCDSDK*GEFGGFGSVTGK	RBBP7_MOUSE Histone-binding protein RBBP7 OS=Mus musculus OX=10090 GN=Rbbp7 PE=1 SV=1	1.08625	0.540654
Hmgb2_K147	Hmgb2	DKQPYEQK*AAK	HMGB2_MOUSE High mobility group protein B2 OS=Mus musculus OX=10090 GN=Hmgb2 PE=1 SV=3	1.08563	0.446435
Gapdh_K257	Gapdh	YDDIK*K	G3P_MOUSE Glyceraldehyde-3-phosphate dehydrogenase OS=Mus musculus OX=10090 GN=Gapdh PE=1 SV=2	1.08562	0.490172
Rpl19_K65	Rpl19	K*NTLAR	RL19_MOUSE 60S ribosomal protein L19 OS=Mus musculus OX=10090 GN=Rpl19 PE=1 SV=1	1.085	0.513468
Ahsa1_K203	Ahsa1	PVGVK*IPTCK	AHSA1_MOUSE Activator of 90 kDa heat shock protein ATPase homolog 1 OS=Mus musculus OX=10090 GN=Ahsa1 PE=1 SV=2	1.085	0.618627
Hand2_K183	Hand2	K*ELNEILK	HAND2_MOUSE Heart- and neural crest derivatives-expressed protein 2 OS=Mus musculus OX=10090 GN=Hand2 PE=1 SV=3	1.085	0.619825
Dnaja1_K37	Dnaja1	YHPDK*NPNEGEK	DNJA1_MOUSE DnaJ homolog subfamily A member 1 OS=Mus musculus OX=10090 GN=Dnaja1 PE=1 SV=1	1.08429	0.317754
Rcc2_K186	Rcc2	GQLGHGDTK*R	RCC2_MOUSE Protein RCC2 OS=Mus musculus OX=10090 GN=Rcc2 PE=1 SV=1	1.08429	0.533295
Sgpl1_K353	Sgpl1	GVTSISADTHK*YGYAPK	SGPL1_MOUSE Sphingosine-1-phosphate lyase 1 OS=Mus musculus OX=10090 GN=Sgpl1 PE=1 SV=1	1.08429	0.6923
Tmpo_K212	Tmpo	TPVTLK*QR	LAP2B_MOUSE Lamina-associated polypeptide 2, isoforms beta/delta/epsilon/gamma OS=Mus musculus OX=10090 GN=Tmpo PE=1 SV=4	1.084	0.296182
Ptges3_K65	Ptges3	HLNEIDLFHCIDPNDSK*HK	TEBP_MOUSE Prostaglandin E synthase 3 OS=Mus musculus OX=10090 GN=Ptges3 PE=1 SV=1	1.08375	0.509877
Hspd1_K352	Hspd1	VGEVIVTK*DDAMLLK	CH60_MOUSE 60 kDa heat shock protein, mitochondrial OS=Mus musculus OX=10090 GN=Hspd1 PE=1 SV=1	1.08333	0.204237
Hmgcl_K184	Hmgcl	VSPAK*VAEVAK	HMGCL_MOUSE Hydroxymethylglutaryl-CoA lyase, mitochondrial OS=Mus musculus OX=10090 GN=Hmgcl PE=1 SV=2	1.08333	0.286295
Eif3a_K632	Eif3a	ILQEHEQIK*K	EIF3A_MOUSE Eukaryotic translation initiation factor 3 subunit A OS=Mus musculus OX=10090 GN=Eif3a PE=1 SV=5	1.08333	0.439563
Lbr_K111	Lbr	SVSASHEGDVK*EK	LBR_MOUSE Delta(14)-sterol reductase LBR OS=Mus musculus OX=10090 GN=Lbr PE=1 SV=2	1.08333	0.446897
Lcp1_K88	Lcp1	STEVAK*TFR	PLSL_MOUSE Plastin-2 OS=Mus musculus OX=10090 GN=Lcp1 PE=1 SV=4	1.082	0.642174
Lmna_K114	Lmna	VREEFK*ELK	LMNA_MOUSE Prelamin-A/C OS=Mus musculus OX=10090 GN=Lmna PE=1 SV=2	1.08167	0.339858
Syncrip_K221	Syncrip	EAAQEAVK*LYNNHEIR	HNRPQ_MOUSE Heterogeneous nuclear ribonucleoprotein Q OS=Mus musculus OX=10090 GN=Syncrip PE=1 SV=2	1.08167	0.607875
Rps3a_K249	Rps3a	AAGDETGAK*VER	RS3A_MOUSE 40S ribosomal protein S3a OS=Mus musculus OX=10090 GN=Rps3a PE=1 SV=3	1.08167	0.213247
Hcls1_K183	Hcls1	GETEK*HESQR	HCLS1_MOUSE Hematopoietic lineage cell-specific protein OS=Mus musculus OX=10090 GN=Hcls1 PE=1 SV=2	1.08125	0.367371
Eif3b_K730	Eif3b	LSQSK*ASK	EIF3B_MOUSE Eukaryotic translation initiation factor 3 subunit B OS=Mus musculus OX=10090 GN=Eif3b PE=1 SV=1	1.08083	0.268896
Myh9_K1404	Myh9	LEEK*VAAYDK LEEK*VAAYDKLEK	MYH9_MOUSE Myosin-9 OS=Mus musculus OX=10090 GN=Myh9 PE=1 SV=4	1.08062	0.210449
Ankrd26_K176	Ankrd26	LLAHNANIEAK*NK	ANR26_MOUSE Ankyrin repeat domain-containing protein 26 OS=Mus musculus OX=10090 GN=Ankrd26 PE=1 SV=2	1.08
Gle1_K178	Gle1	RFDELK*ELK	GLE1_MOUSE Nucleoporin GLE1 OS=Mus musculus OX=10090 GN=Gle1 PE=1 SV=2	1.08
Ppp2ca_K34	Ppp2ca	SLCEK*AK	PP2AA_MOUSE Serine/threonine-protein phosphatase 2A catalytic subunit alpha isoform OS=Mus musculus OX=10090 GN=Ppp2ca PE=1 SV=1	1.08
Ngdn_K98	Ngdn	TVLEK*LRPLDQK	NGDN_MOUSE Neuroguidin OS=Mus musculus OX=10090 GN=Ngdn PE=1 SV=1	1.08
Rpl19_K46	Rpl19	LIK*DGLIIR	RL19_MOUSE 60S ribosomal protein L19 OS=Mus musculus OX=10090 GN=Rpl19 PE=1 SV=1	1.08
Pitpna_K179	Pitpna	GPLGPNWK*QELVNQK	PIPNA_MOUSE Phosphatidylinositol transfer protein alpha isoform OS=Mus musculus OX=10090 GN=Pitpna PE=1 SV=2	1.08
Rab10_K136	Rab10	GK*GEQIAR	RAB10_MOUSE Ras-related protein Rab-10 OS=Mus musculus OX=10090 GN=Rab10 PE=1 SV=1	1.08
Gars1_K496	Gars1	GAVGK*AYK	GARS_MOUSE Glycine--tRNA ligase OS=Mus musculus OX=10090 GN=Gars1 PE=1 SV=1	1.08
Tpr_K551	Tpr	ANK*HSSVLER	TPR_MOUSE Nucleoprotein TPR OS=Mus musculus OX=10090 GN=Tpr PE=1 SV=1	1.08
Myl6_K81	Myl6	NK*DQGTYEDYVEGLR	MYL6_MOUSE Myosin light polypeptide 6 OS=Mus musculus OX=10090 GN=Myl6 PE=1 SV=3	1.08
Naa50_K17	Naa50	IELGDVTPHNIK*QLK	NAA50_MOUSE N-alpha-acetyltransferase 50 OS=Mus musculus OX=10090 GN=Naa50 PE=1 SV=1	1.08
Bcap31_K181	Bcap31	LEENK*SLK	BAP31_MOUSE B-cell receptor-associated protein 31 OS=Mus musculus OX=10090 GN=Bcap31 PE=1 SV=4	1.08
Ncapg2_K178	Ncapg2	SLETK*SGADVCR	CNDG2_MOUSE Condensin-2 complex subunit G2 OS=Mus musculus OX=10090 GN=Ncapg2 PE=1 SV=2	1.08
Ncl_K624	Ncl	AAK*EAMEDGEIDGNK	NUCL_MOUSE Nucleolin OS=Mus musculus OX=10090 GN=Ncl PE=1 SV=2	1.08
Pum1_K258	Pum1	KNK*GTFDGDK	PUM1_MOUSE Pumilio homolog 1 OS=Mus musculus OX=10090 GN=Pum1 PE=1 SV=2	1.08
Fmn1_K425	Fmn1	K*VIESEK	FMN1_MOUSE Formin-1 OS=Mus musculus OX=10090 GN=Fmn1 PE=1 SV=2	1.08
Eef1g_K294	Eef1g	STFVLDEFK*R	EF1G_MOUSE Elongation factor 1-gamma OS=Mus musculus OX=10090 GN=Eef1g PE=1 SV=3	1.08
Capza1_K278	Capza1	ILSYK*IGK	CAZA1_MOUSE F-actin-capping protein subunit alpha-1 OS=Mus musculus OX=10090 GN=Capza1 PE=1 SV=4	1.08
Ddx21_K649	Ddx21	ASSK*DAIR	DDX21_MOUSE Nucleolar RNA helicase 2 OS=Mus musculus OX=10090 GN=Ddx21 PE=1 SV=3	1.08	0.120106
Canx_K171	Canx	LLSK*TAELSLDQFHDK	CALX_MOUSE Calnexin OS=Mus musculus OX=10090 GN=Canx PE=1 SV=1	1.08	0.409662
Wapl_K836	Wapl	LLGGLDHIVDK*VK	WAPL_MOUSE Wings apart-like protein homolog OS=Mus musculus OX=10090 GN=Wapl PE=1 SV=2	1.08	0.457619
Rbm14_K149	Rbm14	INVELSTK*GQK	RBM14_MOUSE RNA-binding protein 14 OS=Mus musculus OX=10090 GN=Rbm14 PE=1 SV=1	1.08	0.834095
Tars1_K242	Tars1	ILNEK*VNTPTTTVYR	SYTC_MOUSE Threonine--tRNA ligase 1, cytoplasmic OS=Mus musculus OX=10090 GN=Tars1 PE=1 SV=2	1.08	0.861505
Cct2_K248	Cct2	ILIANTGMDTDK*IK	TCPB_MOUSE T-complex protein 1 subunit beta OS=Mus musculus OX=10090 GN=Cct2 PE=1 SV=4	1.08	0.679229
Prune2_K2503	Prune2	VIPTK*GPK	PRUN2_MOUSE Protein prune homolog 2 OS=Mus musculus OX=10090 GN=Prune2 PE=1 SV=2	1.07929	0.47631
Eef2_K512	Eef2	VAVEAK*NPADLPK	EF2_MOUSE Elongation factor 2 OS=Mus musculus OX=10090 GN=Eef2 PE=1 SV=2	1.07929	0.179562
Coro1a_K446	Coro1a	NLNAIVQK*LQER	COR1A_MOUSE Coronin-1A OS=Mus musculus OX=10090 GN=Coro1a PE=1 SV=5	1.079	0.567233
Psat1_K116	Psat1	AAEEAK*K	SERC_MOUSE Phosphoserine aminotransferase OS=Mus musculus OX=10090 GN=Psat1 PE=1 SV=1	1.07833	0.391557
Vars1_K1251	Vars1	K*VDEAIALFQK	SYVC_MOUSE Valine--tRNA ligase OS=Mus musculus OX=10090 GN=Vars1 PE=1 SV=1	1.07667	0.655409
Ptbp1_K64	Ptbp1	K*LPSDVTEGEVISLGLPFGK	PTBP1_MOUSE Polypyrimidine tract-binding protein 1 OS=Mus musculus OX=10090 GN=Ptbp1 PE=1 SV=2	1.07667	0.492634
Ddx21_K392	Ddx21	IK*DHLQNGK	DDX21_MOUSE Nucleolar RNA helicase 2 OS=Mus musculus OX=10090 GN=Ddx21 PE=1 SV=3	1.076	0.399015
Fcer1g_K60	Fcer1g	EK*ADAVYTGLNTR	FCERG_MOUSE High affinity immunoglobulin epsilon receptor subunit gamma OS=Mus musculus OX=10090 GN=Fcer1g PE=1 SV=1	1.075	0.27795
Stat1_K673	Stat1	YLYPNIDK*DHAFGK	STAT1_MOUSE Signal transducer and activator of transcription 1 OS=Mus musculus OX=10090 GN=Stat1 PE=1 SV=1	1.075
Nsun2_K639	Nsun2	K*LSSEAYSQVK	NSUN2_MOUSE RNA cytosine C(5)-methyltransferase NSUN2 OS=Mus musculus OX=10090 GN=Nsun2 PE=1 SV=2	1.075	0.46618
Eif2s3y_K421	Eif2s3y	VSAVK*ADLGK	IF2H_MOUSE Eukaryotic translation initiation factor 2 subunit 3, Y-linked OS=Mus musculus OX=10090 GN=Eif2s3y PE=1 SV=2	1.075	0.605137
Sfpq_K224	Sfpq	PGGGPGMGAPGGHPK*PPHR	SFPQ_MOUSE Splicing factor, proline- and glutamine-rich OS=Mus musculus OX=10090 GN=Sfpq PE=1 SV=1	1.075	0.709378
Stip1_K78	Stip1	K*AAALEFLNR	STIP1_MOUSE Stress-induced-phosphoprotein 1 OS=Mus musculus OX=10090 GN=Stip1 PE=1 SV=1	1.07438	0.583517
Cfl1_K144	Cfl1	HELQANCYEEVK*DR	COF1_MOUSE Cofilin-1 OS=Mus musculus OX=10090 GN=Cfl1 PE=1 SV=3	1.07375	0.357944
Nop58_K444	Nop58	K*IEEVDKEDEITEK	NOP58_MOUSE Nucleolar protein 58 OS=Mus musculus OX=10090 GN=Nop58 PE=1 SV=1	1.07375	0.445309
Rpl27_K117	Rpl27	VK*FEER	RL27_MOUSE 60S ribosomal protein L27 OS=Mus musculus OX=10090 GN=Rpl27 PE=1 SV=2	1.07333	0.743596
Pfkp_K394	Pfkp	FEGNLNTYK*R	PFKAP_MOUSE ATP-dependent 6-phosphofructokinase, platelet type OS=Mus musculus OX=10090 GN=Pfkp PE=1 SV=1	1.07333	0.820872
Eif4g2_K31	Eif4g2	GAPQHYPK*TAGNSEFLGK	IF4G2_MOUSE Eukaryotic translation initiation factor 4 gamma 2 OS=Mus musculus OX=10090 GN=Eif4g2 PE=1 SV=2	1.07333	0.82938
Eef2_K439	Eef2	K*EDLYLKPIQR	EF2_MOUSE Elongation factor 2 OS=Mus musculus OX=10090 GN=Eef2 PE=1 SV=2	1.0725	0.22239
Npm1_K261	Npm1	GGSLPK*VEAK	NPM_MOUSE Nucleophosmin OS=Mus musculus OX=10090 GN=Npm1 PE=1 SV=1	1.07187	0.407172
Pgk1_K146	Pgk1	AEPAK*IDAFR	PGK1_MOUSE Phosphoglycerate kinase 1 OS=Mus musculus OX=10090 GN=Pgk1 PE=1 SV=4	1.07187	0.449124
Numa1_K724	Numa1	AADALK*EQQCR	NUMA1_MOUSE Nuclear mitotic apparatus protein 1 OS=Mus musculus OX=10090 GN=Numa1 PE=1 SV=1	1.07167	0.668514
Taldo1_K286	Taldo1	AAQTSDSEK*IHLDEK	TALDO_MOUSE Transaldolase OS=Mus musculus OX=10090 GN=Taldo1 PE=1 SV=2	1.07143	0.300855
Tln1_K1948	Tln1	K*ELIECAR	TLN1_MOUSE Talin-1 OS=Mus musculus OX=10090 GN=Tln1 PE=1 SV=2	1.07125	0.161901
Lmnb1_K272	Lmnb1	EELEQTYHAK*LENAR LYKEELEQTYHAK*LENAR	LMNB1_MOUSE Lamin-B1 OS=Mus musculus OX=10090 GN=Lmnb1 PE=1 SV=3	1.07062	0.61779
Tpm3_K113	Tpm3	LATALQK*LEEAEK	TPM3_MOUSE Tropomyosin alpha-3 chain OS=Mus musculus OX=10090 GN=Tpm3 PE=1 SV=3	1.07	0.579622
Rrp12_K20	Rrp12	K*GHSSDSNPATCR	RRP12_MOUSE RRP12-like protein OS=Mus musculus OX=10090 GN=Rrp12 PE=1 SV=1	1.07
Gramd2b_K314	Gramd2b	GETK*PPR	GRM2B_MOUSE GRAM domain-containing protein 2B OS=Mus musculus OX=10090 GN=Gramd2b PE=1 SV=2	1.07
Akr1b8_K235	Akr1b8	IK*EIAAK	ALD2_MOUSE Aldose reductase-related protein 2 OS=Mus musculus OX=10090 GN=Akr1b8 PE=1 SV=2	1.07
Fbxl5_K403	Fbxl5	ALEK*ISR	FBXL5_MOUSE F-box/LRR-repeat protein 5 OS=Mus musculus OX=10090 GN=Fbxl5 PE=2 SV=2	1.07
Cltc_K245	Cltc	LHIIEVGTPPTGNQPFPK*K	CLH1_MOUSE Clathrin heavy chain 1 OS=Mus musculus OX=10090 GN=Cltc PE=1 SV=3	1.07
Pkm_K62	Pkm	SVEMLK*EMIK	KPYM_MOUSE Pyruvate kinase PKM OS=Mus musculus OX=10090 GN=Pkm PE=1 SV=4	1.07
Ptpn6_K19	Ptpn6	DLSGPDAETLLK*GR	PTN6_MOUSE Tyrosine-protein phosphatase non-receptor type 6 OS=Mus musculus OX=10090 GN=Ptpn6 PE=1 SV=2	1.07
Utp18_K233	Utp18	GILK*MK	UTP18_MOUSE U3 small nucleolar RNA-associated protein 18 homolog OS=Mus musculus OX=10090 GN=Utp18 PE=1 SV=1	1.07
Nap1l4_K258	Nap1l4	GK*NVTVK	NP1L4_MOUSE Nucleosome assembly protein 1-like 4 OS=Mus musculus OX=10090 GN=Nap1l4 PE=1 SV=1	1.07
Ncaph_K682	Ncaph	LSGLTK*DLQTR	CND2_MOUSE Condensin complex subunit 2 OS=Mus musculus OX=10090 GN=Ncaph PE=1 SV=1	1.07
Trim28_K320	Trim28	VLVNDAQK*VTEGQQER	TIF1B_MOUSE Transcription intermediary factor 1-beta OS=Mus musculus OX=10090 GN=Trim28 PE=1 SV=3	1.07
Esyt3_K325	Esyt3	LAQK*DNFLGLGGK	ESYT3_MOUSE Extended synaptotagmin-3 OS=Mus musculus OX=10090 GN=Esyt3 PE=2 SV=2	1.07
Anln_K366	Anln	GIK*PFLER	ANLN_MOUSE Anillin OS=Mus musculus OX=10090 GN=Anln PE=1 SV=2	1.07
Ncl_K698	Ncl	GGGGDFK*PQGK	NUCL_MOUSE Nucleolin OS=Mus musculus OX=10090 GN=Ncl PE=1 SV=2	1.07
Txlna_K60	Txlna	AK*AAQPGALCDVSEELSR	TXLNA_MOUSE Alpha-taxilin OS=Mus musculus OX=10090 GN=Txlna PE=1 SV=1	1.07
Tecr_K16	Tecr	EK*LCFLDK	TECR_MOUSE Very-long-chain enoyl-CoA reductase OS=Mus musculus OX=10090 GN=Tecr PE=1 SV=1	1.07
Smc3_K820	Smc3	IK*LEGIITR	SMC3_MOUSE Structural maintenance of chromosomes protein 3 OS=Mus musculus OX=10090 GN=Smc3 PE=1 SV=2	1.07
Pdia3_K433	Pdia3	DPNIVIAK*MDATANDVPSPYEVK	PDIA3_MOUSE Protein disulfide-isomerase A3 OS=Mus musculus OX=10090 GN=Pdia3 PE=1 SV=2	1.07
Plekho2_K318	Plekho2	ILSEK*MK	PKHO2_MOUSE Pleckstrin homology domain-containing family O member 2 OS=Mus musculus OX=10090 GN=Plekho2 PE=1 SV=1	1.07	0.136163
Vim_K120	Vim	FANYIDK*VR	VIME_MOUSE Vimentin OS=Mus musculus OX=10090 GN=Vim PE=1 SV=3	1.07	0.224581
Eef1a1_K255	Eef1a1	LPLQDVYK*IGGIGTVPVGR	EF1A1_MOUSE Elongation factor 1-alpha 1 OS=Mus musculus OX=10090 GN=Eef1a1 PE=1 SV=3	1.07	0.312368
Cct8_K534	Cct8	PAGGPK*PPSGK	TCPQ_MOUSE T-complex protein 1 subunit theta OS=Mus musculus OX=10090 GN=Cct8 PE=1 SV=3	1.07	0.428738
Cfp_K441	Cfp	PLCEALQGQK*LVVEEK	PROP_MOUSE Properdin OS=Mus musculus OX=10090 GN=Cfp PE=1 SV=2	1.07	0.704833
Niban2_K330	Niban2	AFILPK*AEVCVR	NIBA2_MOUSE Protein Niban 2 OS=Mus musculus OX=10090 GN=Niban2 PE=1 SV=2	1.07	0.722035
Eif4b_K557	Eif4b	DHWK*DLDR	IF4B_MOUSE Eukaryotic translation initiation factor 4B OS=Mus musculus OX=10090 GN=Eif4b PE=1 SV=1	1.07	0.763883
Pgk1_K15	Pgk1	LTLDKLDVK*GK	PGK1_MOUSE Phosphoglycerate kinase 1 OS=Mus musculus OX=10090 GN=Pgk1 PE=1 SV=4	1.07	0.832524
Cap1_K177	Cap1	K*HVDWVR	CAP1_MOUSE Adenylyl cyclase-associated protein 1 OS=Mus musculus OX=10090 GN=Cap1 PE=1 SV=4	1.07	0.499998
Wars1_K31	Wars1	SLK*AGNAPK	SYWC_MOUSE Tryptophan--tRNA ligase, cytoplasmic OS=Mus musculus OX=10090 GN=Wars1 PE=1 SV=2	1.07	0.538393
Mthfd1_K553	Mthfd1	ITIGQSPTEK*GHTR	C1TC_MOUSE C-1-tetrahydrofolate synthase, cytoplasmic OS=Mus musculus OX=10090 GN=Mthfd1 PE=1 SV=4	1.06917	0.389557
Hsp90ab1_K347	Hsp90ab1	APFDLFENK*K	HS90B_MOUSE Heat shock protein HSP 90-beta OS=Mus musculus OX=10090 GN=Hsp90ab1 PE=1 SV=3	1.06875	0.642753
Rac2_K128	Rac2	DDKDTIEK*LK	RAC2_MOUSE Ras-related C3 botulinum toxin substrate 2 OS=Mus musculus OX=10090 GN=Rac2 PE=1 SV=1	1.06833	0.664868
Hsp90ab1_K624	Hsp90ab1	K*HLEINPDHPIVETLR	HS90B_MOUSE Heat shock protein HSP 90-beta OS=Mus musculus OX=10090 GN=Hsp90ab1 PE=1 SV=3	1.0675	0.487669
Hnrnpk_K198	Hnrnpk	VVLIGGK*PDR	HNRPK_MOUSE Heterogeneous nuclear ribonucleoprotein K OS=Mus musculus OX=10090 GN=Hnrnpk PE=1 SV=1	1.0675	0.623478
Cct6a_K377	Cct6a	SVTLLVK*GPNK	TCPZ_MOUSE T-complex protein 1 subunit zeta OS=Mus musculus OX=10090 GN=Cct6a PE=1 SV=3	1.06688	0.490285
Aimp1_K54	Aimp1	VENAK*LK	AIMP1_MOUSE Aminoacyl tRNA synthase complex-interacting multifunctional protein 1 OS=Mus musculus OX=10090 GN=Aimp1 PE=1 SV=2	1.06583	0.148896
Hirip3_K498	Hirip3	LLGSCSSHK*AR	HIRP3_MOUSE HIRA-interacting protein 3 OS=Mus musculus OX=10090 GN=Hirip3 PE=1 SV=1	1.065
Ubxn4_K268	Ubxn4	IK*QQIALDR	UBXN4_MOUSE UBX domain-containing protein 4 OS=Mus musculus OX=10090 GN=Ubxn4 PE=1 SV=1	1.065	0.0482841
Plec_K3569	Plec	AGVVGPELHEK*LLSAEK	PLEC_MOUSE Plectin OS=Mus musculus OX=10090 GN=Plec PE=1 SV=3	1.065	0.233716
Etfb_K176	Etfb	LK*LPAVVTADLR	ETFB_MOUSE Electron transfer flavoprotein subunit beta OS=Mus musculus OX=10090 GN=Etfb PE=1 SV=3	1.065	0.314438
Ssr3_K103	Ssr3	K*LSEADNR	SSRG_MOUSE Translocon-associated protein subunit gamma OS=Mus musculus OX=10090 GN=Ssr3 PE=1 SV=1	1.065	0.545395
Upf1_K924	Upf1	K*LVNTVNPGAR	RENT1_MOUSE Regulator of nonsense transcripts 1 OS=Mus musculus OX=10090 GN=Upf1 PE=1 SV=2	1.065	0.617996
Hnrnpf_K98	Hnrnpf	TEMDWVLK*HSGPNSADSANDGFVR	HNRPF_MOUSE Heterogeneous nuclear ribonucleoprotein F OS=Mus musculus OX=10090 GN=Hnrnpf PE=1 SV=3	1.065	0.654981
Abce1_K584	Abce1	LNSIK*DVEQK	ABCE1_MOUSE ATP-binding cassette sub-family E member 1 OS=Mus musculus OX=10090 GN=Abce1 PE=1 SV=1	1.065	0.658995
Hpf1_K191	Hpf1	NIDEK*LTEAAR	HPF1_MOUSE Histone PARylation factor 1 OS=Mus musculus OX=10090 GN=Hpf1 PE=1 SV=1	1.065	0.694728
Mcts2_K51	Mcts2	KDPVK*IVR	MCTS2_MOUSE Malignant T-cell-amplified sequence 2 OS=Mus musculus OX=10090 GN=Mcts2 PE=1 SV=1	1.06429	0.414072
Hspa4_K718	Hspa4	VISSFK*NK	HSP74_MOUSE Heat shock 70 kDa protein 4 OS=Mus musculus OX=10090 GN=Hspa4 PE=1 SV=1	1.06417	0.298015
Vasp_K343	Vasp	VK*QELLEEVRK	VASP_MOUSE Vasodilator-stimulated phosphoprotein OS=Mus musculus OX=10090 GN=Vasp PE=1 SV=4	1.06375	0.426667
Sfpq_K200	Sfpq	PGPGPGGPK*GGK	SFPQ_MOUSE Splicing factor, proline- and glutamine-rich OS=Mus musculus OX=10090 GN=Sfpq PE=1 SV=1	1.06375	0.610224
Rps25_K25	Rps25	DKDPVNK*SGGK	RS25_MOUSE 40S ribosomal protein S25 OS=Mus musculus OX=10090 GN=Rps25 PE=1 SV=1	1.06375	0.710462
Psme1_K13	Psme1	VHPEAQAK*VDVFR	PSME1_MOUSE Proteasome activator complex subunit 1 OS=Mus musculus OX=10090 GN=Psme1 PE=1 SV=2	1.06375	0.855839
Syk_K521	Syk	ADENYYK*AQTHGK	KSYK_MOUSE Tyrosine-protein kinase SYK OS=Mus musculus OX=10090 GN=Syk PE=1 SV=2	1.06333	0.446654
Eny2_K19	Eny2	AAINQK*LIETGER	ENY2_MOUSE Transcription and mRNA export factor ENY2 OS=Mus musculus OX=10090 GN=Eny2 PE=1 SV=1	1.06333	0.663862
Cltc_K1441	Cltc	AVNYFSK*VK	CLH1_MOUSE Clathrin heavy chain 1 OS=Mus musculus OX=10090 GN=Cltc PE=1 SV=3	1.06333	0.722354
Sumo1_K37	Sumo1	VIGQDSSEIHFK*VK	SUMO1_MOUSE Small ubiquitin-related modifier 1 OS=Mus musculus OX=10090 GN=Sumo1 PE=1 SV=1	1.06312	0.495339
Ywhag_K10	Ywhag	LVQK*AR EQLVQK*AR	1433G_MOUSE 14-3-3 protein gamma OS=Mus musculus OX=10090 GN=Ywhag PE=1 SV=2	1.06312	0.687492
Myh9_K1477	Myh9	EKETK*ALSLAR	MYH9_MOUSE Myosin-9 OS=Mus musculus OX=10090 GN=Myh9 PE=1 SV=4	1.063	0.321695
Fabp5_K10	Fabp5	DLEGK*WR	FABP5_MOUSE Fatty acid-binding protein 5 OS=Mus musculus OX=10090 GN=Fabp5 PE=1 SV=3	1.0625	0.539048
Prrc2c_K638	Prrc2c	PGYFK*QFQK	PRC2C_MOUSE Protein PRRC2C OS=Mus musculus OX=10090 GN=Prrc2c PE=1 SV=3	1.0625	0.874334
Rps25_K18	Rps25	K*DKDPVNK	RS25_MOUSE 40S ribosomal protein S25 OS=Mus musculus OX=10090 GN=Rps25 PE=1 SV=1	1.06167	0.588965
Rpl10_K30	Rpl10	GVPDAK*IR	RL10_MOUSE 60S ribosomal protein L10 OS=Mus musculus OX=10090 GN=Rpl10 PE=1 SV=3	1.061	0.704371
Phgdh_K21	Phgdh	K*ILQDGGLQVVEK	SERA_MOUSE D-3-phosphoglycerate dehydrogenase OS=Mus musculus OX=10090 GN=Phgdh PE=1 SV=3	1.06083	0.275528
P4hb_K83	P4hb	LAK*VDATEESDLAQQYGVR	PDIA1_MOUSE Protein disulfide-isomerase OS=Mus musculus OX=10090 GN=P4hb PE=1 SV=2	1.06083	0.653248
Hmgb2_K167	Hmgb2	GK*SEAGK	HMGB2_MOUSE High mobility group protein B2 OS=Mus musculus OX=10090 GN=Hmgb2 PE=1 SV=3	1.06083	0.684164
Copa_K446	Copa	NEITK*K	COPA_MOUSE Coatomer subunit alpha OS=Mus musculus OX=10090 GN=Copa PE=1 SV=2	1.06
Rsl1d1_K375	Rsl1d1	MQENITGK*TPK	RL1D1_MOUSE Ribosomal L1 domain-containing protein 1 OS=Mus musculus OX=10090 GN=Rsl1d1 PE=1 SV=1	1.06
Tuba1a_K326	Tuba1a	GDVVPK*DVNAAIATIK	TBA1A_MOUSE Tubulin alpha-1A chain OS=Mus musculus OX=10090 GN=Tuba1a PE=1 SV=1	1.06
Ap1m1_K217	Ap1m1	LGLNDK*VLFDNTGR	AP1M1_MOUSE AP-1 complex subunit mu-1 OS=Mus musculus OX=10090 GN=Ap1m1 PE=1 SV=3	1.06
Fkbp8_K274	Fkbp8	CLNNLAASQLK*LDHYR	FKBP8_MOUSE Peptidyl-prolyl cis-trans isomerase FKBP8 OS=Mus musculus OX=10090 GN=Fkbp8 PE=1 SV=2	1.06
Stam_K353	Stam	K*HSELSELNVK	STAM1_MOUSE Signal transducing adapter molecule 1 OS=Mus musculus OX=10090 GN=Stam PE=1 SV=3	1.06
Ppp2r2a_K396	Ppp2r2a	K*VCASGK	2ABA_MOUSE Serine/threonine-protein phosphatase 2A 55 kDa regulatory subunit B alpha isoform OS=Mus musculus OX=10090 GN=Ppp2r2a PE=1 SV=1	1.06
Psmb1_K203	Psmb1	LVK*DVFISAAER	PSB1_MOUSE Proteasome subunit beta type-1 OS=Mus musculus OX=10090 GN=Psmb1 PE=1 SV=1	1.06
Bud31_K40	Bud31	EAETEPHEGK*R	BUD31_MOUSE Protein BUD31 homolog OS=Mus musculus OX=10090 GN=Bud31 PE=1 SV=2	1.06
Atxn2l_K541	Atxn2l	VPGLQNEQK*R	ATX2L_MOUSE Ataxin-2-like protein OS=Mus musculus OX=10090 GN=Atxn2l PE=1 SV=1	1.06
Rpl13_K200	Rpl13	AK*EAAEQDVEK	RL13_MOUSE 60S ribosomal protein L13 OS=Mus musculus OX=10090 GN=Rpl13 PE=1 SV=3	1.06
Kpnb1_K73	Kpnb1	DPDIK*AQYQQR	IMB1_MOUSE Importin subunit beta-1 OS=Mus musculus OX=10090 GN=Kpnb1 PE=1 SV=2	1.06
Sf3a1_K251	Sf3a1	VEWAK*FQER	SF3A1_MOUSE Splicing factor 3A subunit 1 OS=Mus musculus OX=10090 GN=Sf3a1 PE=1 SV=1	1.06
Rps3a_K187	Rps3a	EVVNK*LIPDSIGK	RS3A_MOUSE 40S ribosomal protein S3a OS=Mus musculus OX=10090 GN=Rps3a PE=1 SV=3	1.06
Lcp1_K444	Lcp1	VNK*PPYPK	PLSL_MOUSE Plastin-2 OS=Mus musculus OX=10090 GN=Lcp1 PE=1 SV=4	1.06	0.204778
Ldha_K224	Ldha	SLNPELGTDADK*EQWKEVHK	LDHA_MOUSE L-lactate dehydrogenase A chain OS=Mus musculus OX=10090 GN=Ldha PE=1 SV=3	1.06	0.44228
Abce1_K419	Abce1	ISPK*STGSVR	ABCE1_MOUSE ATP-binding cassette sub-family E member 1 OS=Mus musculus OX=10090 GN=Abce1 PE=1 SV=1	1.06	0.568269
Rab1b_K55	Rab1b	TIELDGK*TIK	RAB1B_MOUSE Ras-related protein Rab-1B OS=Mus musculus OX=10090 GN=Rab1b PE=1 SV=1	1.06	0.745085
Ptpn6_K560	Ptpn6	HK*EEVYENVHSK	PTN6_MOUSE Tyrosine-protein phosphatase non-receptor type 6 OS=Mus musculus OX=10090 GN=Ptpn6 PE=1 SV=2	1.06	0.878288
Aifm1_K294	Aifm1	ALEK*ISR	AIFM1_MOUSE Apoptosis-inducing factor 1, mitochondrial OS=Mus musculus OX=10090 GN=Aifm1 PE=1 SV=1	1.06	0.501154
Hspa8_K451	Hspa8	AMTK*DNNLLGK	HSP7C_MOUSE Heat shock cognate 71 kDa protein OS=Mus musculus OX=10090 GN=Hspa8 PE=1 SV=1	1.06	0.643966
Ppib_K215	Ppib	IEVEKPFAIAK*E	PPIB_MOUSE Peptidyl-prolyl cis-trans isomerase B OS=Mus musculus OX=10090 GN=Ppib PE=1 SV=2	1.05917	0.743073
Ranbp2_K776	Ranbp2	SADSELK*HSTPSPTK	RBP2_MOUSE E3 SUMO-protein ligase RanBP2 OS=Mus musculus OX=10090 GN=Ranbp2 PE=1 SV=2	1.058	0.737612
Rpl29_K134	Rpl29	APAK*AQASAPAQAPK	RL29_MOUSE 60S ribosomal protein L29 OS=Mus musculus OX=10090 GN=Rpl29 PE=1 SV=2	1.05786	0.592545
Gatm_K55	Gatm	NSCAAEDK*ATHPLPK	GATM_MOUSE Glycine amidinotransferase, mitochondrial OS=Mus musculus OX=10090 GN=Gatm PE=1 SV=1	1.05786	0.688376
Rpl6_K5	Rpl6	AGEK*APDTK	RL6_MOUSE 60S ribosomal protein L6 OS=Mus musculus OX=10090 GN=Rpl6 PE=1 SV=3	1.0575	0.55082
Anp32b_K110	Anp32b	DISTLEPLK*R	AN32B_MOUSE Acidic leucine-rich nuclear phosphoprotein 32 family member B OS=Mus musculus OX=10090 GN=Anp32b PE=1 SV=1	1.0575	0.575051
Ranbp1_K150	Ranbp1	FLNAENAQK*FK	RANG_MOUSE Ran-specific GTPase-activating protein OS=Mus musculus OX=10090 GN=Ranbp1 PE=1 SV=2	1.0575	0.408952
Anxa2_K279	Anxa2	LYDSMK*GK	ANXA2_MOUSE Annexin A2 OS=Mus musculus OX=10090 GN=Anxa2 PE=1 SV=2	1.05643	0.586075
Hspa5_K327	Hspa5	AK*FEELNMDLFR	BIP_MOUSE Endoplasmic reticulum chaperone BiP OS=Mus musculus OX=10090 GN=Hspa5 PE=1 SV=3	1.05625	0.483015
Rpl11_K78	Rpl11	GAK*AEEILEK	RL11_MOUSE 60S ribosomal protein L11 OS=Mus musculus OX=10090 GN=Rpl11 PE=1 SV=4	1.056	0.30582
Ddx3x_K118	Ddx3x	SGFGK*FER	DDX3X_MOUSE ATP-dependent RNA helicase DDX3X OS=Mus musculus OX=10090 GN=Ddx3x PE=1 SV=3	1.05583	0.784422
Msn_K139	Msn	YGDFNK*EVHK	MOES_MOUSE Moesin OS=Mus musculus OX=10090 GN=Msn PE=1 SV=3	1.055	0.382935
Lars1_K105	Lars1	ACADK*LK	SYLC_MOUSE Leucine--tRNA ligase, cytoplasmic OS=Mus musculus OX=10090 GN=Lars1 PE=1 SV=2	1.055	0.436544
_K194		K*ASWDGPK	ENV1_MOUSE MLV-related proviral Env polyprotein OS=Mus musculus OX=10090 PE=1 SV=3	1.055	0.552928
Irak3_K392	Irak3	VVLDDPK*HVQLR	IRAK3_MOUSE Interleukin-1 receptor-associated kinase 3 OS=Mus musculus OX=10090 GN=Irak3 PE=1 SV=2	1.055
Septin7_K372	Septin7	LK*DSEAELQR	SEPT7_MOUSE Septin-7 OS=Mus musculus OX=10090 GN=Septin7 PE=1 SV=1	1.055	0.514654
Chmp4b_K46	Chmp4b	K*IEQELTAAK	CHM4B_MOUSE Charged multivesicular body protein 4b OS=Mus musculus OX=10090 GN=Chmp4b PE=1 SV=2	1.055	0.518684
Iqgap1_K1128	Iqgap1	LPYDVTPEQALSHEEVK*TR	IQGA1_MOUSE Ras GTPase-activating-like protein IQGAP1 OS=Mus musculus OX=10090 GN=Iqgap1 PE=1 SV=2	1.055	0.795167
Fig4_K830	Fig4	FVQLGQSQHK*QDR	FIG4_MOUSE Polyphosphoinositide phosphatase OS=Mus musculus OX=10090 GN=Fig4 PE=1 SV=1	1.055	0.853638
Ddx3x_K81	Ddx3x	GK*SSFFGDR	DDX3X_MOUSE ATP-dependent RNA helicase DDX3X OS=Mus musculus OX=10090 GN=Ddx3x PE=1 SV=3	1.055	0.853638
Pdap1_K137	Pdap1	TEQAK*ADLAR	HAP28_MOUSE 28 kDa heat- and acid-stable phosphoprotein OS=Mus musculus OX=10090 GN=Pdap1 PE=1 SV=1	1.055	0.918069
Hsp90b1_K683	Hsp90b1	K*TFEINPR	ENPL_MOUSE Endoplasmin OS=Mus musculus OX=10090 GN=Hsp90b1 PE=1 SV=2	1.05438	0.630289
Bcas1_K612	Bcas1	GLGPK*R	BCAS1_MOUSE Breast carcinoma-amplified sequence 1 homolog OS=Mus musculus OX=10090 GN=Bcas1 PE=1 SV=3	1.05375	0.498707
Iqgap1_K959	Iqgap1	GGLK*ALSK	IQGA1_MOUSE Ras GTPase-activating-like protein IQGAP1 OS=Mus musculus OX=10090 GN=Iqgap1 PE=1 SV=2	1.05357	0.272854
Tpm4_K169	Tpm4	NVTNNLK*SLEAASEK	TPM4_MOUSE Tropomyosin alpha-4 chain OS=Mus musculus OX=10090 GN=Tpm4 PE=1 SV=3	1.05333	0.590953
Rpl7a_K34	Rpl7a	VVNPLFEK*R	RL7A_MOUSE 60S ribosomal protein L7a OS=Mus musculus OX=10090 GN=Rpl7a PE=1 SV=2	1.05333	0.734438
Rpn1_K554	Rpn1	VSEMQK*LDAQVK	RPN1_MOUSE Dolichyl-diphosphooligosaccharide--protein glycosyltransferase subunit 1 OS=Mus musculus OX=10090 GN=Rpn1 PE=1 SV=1	1.05333	0.759065
Npm1_K265	Npm1	VEAK*FINYVK	NPM_MOUSE Nucleophosmin OS=Mus musculus OX=10090 GN=Npm1 PE=1 SV=1	1.0525	0.505268
Myh9_K1802	Myh9	LQEMESAVK*SK	MYH9_MOUSE Myosin-9 OS=Mus musculus OX=10090 GN=Myh9 PE=1 SV=4	1.0525	0.540194
Nop56_K90	Nop56	K*VLLGVGDPK	NOP56_MOUSE Nucleolar protein 56 OS=Mus musculus OX=10090 GN=Nop56 PE=1 SV=2	1.0525	0.706056
Serbp1_K298	Serbp1	AIQNK*DR	PAIRB_MOUSE Plasminogen activator inhibitor 1 RNA-binding protein OS=Mus musculus OX=10090 GN=Serbp1 PE=1 SV=2	1.0525	0.74158
Rrbp1_K1564	Rrbp1	AAIK*LQELLK	RRBP1_MOUSE Ribosome-binding protein 1 OS=Mus musculus OX=10090 GN=Rrbp1 PE=1 SV=2	1.05167	0.733579
Hdlbp_K494	Hdlbp	IEGDPQGVQQAK*R	VIGLN_MOUSE Vigilin OS=Mus musculus OX=10090 GN=Hdlbp PE=1 SV=1	1.05125	0.518795
Hmgb2_K127	Hmgb2	IEHPGLSIGDTAK*K	HMGB2_MOUSE High mobility group protein B2 OS=Mus musculus OX=10090 GN=Hmgb2 PE=1 SV=3	1.05125	0.612188
Ncl_K522	Ncl	VPQNPHGK*PK	NUCL_MOUSE Nucleolin OS=Mus musculus OX=10090 GN=Ncl PE=1 SV=2	1.05125	0.733416
Ssb_K404	Ssb	DREEPASK*HK	LA_MOUSE Lupus La protein homolog OS=Mus musculus OX=10090 GN=Ssb PE=1 SV=1	1.05
Wdr18_K299	Wdr18	LWDVK*SK	WDR18_MOUSE WD repeat-containing protein 18 OS=Mus musculus OX=10090 GN=Wdr18 PE=1 SV=1	1.05
Dld_K159	Dld	ITGK*NQVTATK	DLDH_MOUSE Dihydrolipoyl dehydrogenase, mitochondrial OS=Mus musculus OX=10090 GN=Dld PE=1 SV=2	1.05
Cbx3_K113	Cbx3	DAADK*PR	CBX3_MOUSE Chromobox protein homolog 3 OS=Mus musculus OX=10090 GN=Cbx3 PE=1 SV=2	1.05
Rsl1d1_K308	Rsl1d1	K*ATSLLTQSGLASSAPAK	RL1D1_MOUSE Ribosomal L1 domain-containing protein 1 OS=Mus musculus OX=10090 GN=Rsl1d1 PE=1 SV=1	1.05
Mdh1_K110	Mdh1	IFK*SQGTALEK	MDHC_MOUSE Malate dehydrogenase, cytoplasmic OS=Mus musculus OX=10090 GN=Mdh1 PE=1 SV=3	1.05
Rps12_K84	Rps12	K*LGEWVGLCK	RS12_MOUSE 40S ribosomal protein S12 OS=Mus musculus OX=10090 GN=Rps12 PE=1 SV=2	1.05
Ncl_K297	Ncl	K*QKVEGSEPTTPFNLFIGNLNPNK	NUCL_MOUSE Nucleolin OS=Mus musculus OX=10090 GN=Ncl PE=1 SV=2	1.05
Actc1_K70	Actc1	GILTLK*YPIEHGIITNWDDMEK	ACTC_MOUSE Actin, alpha cardiac muscle 1 OS=Mus musculus OX=10090 GN=Actc1 PE=1 SV=1	1.05
Anp32e_K101	Anp32e	IK*DLSTVEALQNLK	AN32E_MOUSE Acidic leucine-rich nuclear phosphoprotein 32 family member E OS=Mus musculus OX=10090 GN=Anp32e PE=1 SV=2	1.05
Anp32b_K101	Anp32b	LAEELPSLTHLNLSGNNLK*DISTLEPLK	AN32B_MOUSE Acidic leucine-rich nuclear phosphoprotein 32 family member B OS=Mus musculus OX=10090 GN=Anp32b PE=1 SV=1	1.05
Tcof1_K468	Tcof1	GANLPCPGK*VGSAALR	TCOF_MOUSE Treacle protein OS=Mus musculus OX=10090 GN=Tcof1 PE=1 SV=1	1.05
Vps13c_K1390	Vps13c	GETK*ACR	VP13C_MOUSE Vacuolar protein sorting-associated protein 13C OS=Mus musculus OX=10090 GN=Vps13c PE=1 SV=2	1.05
Kif5c_K638	Kif5c	ISQHEAK*IK	KIF5C_MOUSE Kinesin heavy chain isoform 5C OS=Mus musculus OX=10090 GN=Kif5c PE=1 SV=3	1.05
Anp32a_K99	Anp32a	HLNLSGNK*IK	AN32A_MOUSE Acidic leucine-rich nuclear phosphoprotein 32 family member A OS=Mus musculus OX=10090 GN=Anp32a PE=1 SV=1	1.05
Zc2hc1a_K151	Zc2hc1a	ISNK*GK	ZC21A_MOUSE Zinc finger C2HC domain-containing protein 1A OS=Mus musculus OX=10090 GN=Zc2hc1a PE=1 SV=1	1.05
Arap2_K1431	Arap2	SIK*EGILK	ARAP2_MOUSE Arf-GAP with Rho-GAP domain, ANK repeat and PH domain-containing protein 2 OS=Mus musculus OX=10090 GN=Arap2 PE=1 SV=2	1.05
Elavl1_K89	Elavl1	LQSK*TIK	ELAV1_MOUSE ELAV-like protein 1 OS=Mus musculus OX=10090 GN=Elavl1 PE=1 SV=2	1.05
Coro1a_K344	Coro1a	K*CEPIAMTVPR	COR1A_MOUSE Coronin-1A OS=Mus musculus OX=10090 GN=Coro1a PE=1 SV=5	1.05
Hspa5_K522	Hspa5	GTGNK*NK	BIP_MOUSE Endoplasmic reticulum chaperone BiP OS=Mus musculus OX=10090 GN=Hspa5 PE=1 SV=3	1.05
H2ac20_K125	H2ac20	KTESHK*AK	H2A2C_MOUSE Histone H2A type 2-C OS=Mus musculus OX=10090 GN=H2ac20 PE=1 SV=3	1.05
Usp25_K716	Usp25	SLQEK*LLAAPK	UBP25_MOUSE Ubiquitin carboxyl-terminal hydrolase 25 OS=Mus musculus OX=10090 GN=Usp25 PE=1 SV=2	1.05	0.429546
Fkbp4_K274	Fkbp4	LEQSNIVK*ER	FKBP4_MOUSE Peptidyl-prolyl cis-trans isomerase FKBP4 OS=Mus musculus OX=10090 GN=Fkbp4 PE=1 SV=5	1.05	0.546412
Ppib_K209	Ppib	IEVEK*PFAIAK	PPIB_MOUSE Peptidyl-prolyl cis-trans isomerase B OS=Mus musculus OX=10090 GN=Ppib PE=1 SV=2	1.05	0.585725
Tcea1_K199	Tcea1	ISNLK*DAK	TCEA1_MOUSE Transcription elongation factor A protein 1 OS=Mus musculus OX=10090 GN=Tcea1 PE=1 SV=2	1.05	0.624883
Magohb_K14	Magohb	YYVGHK*GK	MGN2_MOUSE Protein mago nashi homolog 2 OS=Mus musculus OX=10090 GN=Magohb PE=2 SV=1	1.05	0.689315
Cct3_K21	Cct3	K*VQSGNINAAK	TCPG_MOUSE T-complex protein 1 subunit gamma OS=Mus musculus OX=10090 GN=Cct3 PE=1 SV=1	1.05	0.73312
Coro1a_K207	Coro1a	K*GTVVAEK	COR1A_MOUSE Coronin-1A OS=Mus musculus OX=10090 GN=Coro1a PE=1 SV=5	1.05	0.76625
Myo1e_K138	Myo1e	VSGGGPK*VQHVK	MYO1E_MOUSE Unconventional myosin-Ie OS=Mus musculus OX=10090 GN=Myo1e PE=1 SV=1	1.05	0.781624
Tpr_K158	Tpr	LELEK*LNNQVK	TPR_MOUSE Nucleoprotein TPR OS=Mus musculus OX=10090 GN=Tpr PE=1 SV=1	1.05	0.795167
Ifitm3_K24	Ifitm3	IK*EEYEVAEMGAPHGSASVR	IFM3_MOUSE Interferon-induced transmembrane protein 3 OS=Mus musculus OX=10090 GN=Ifitm3 PE=1 SV=1	1.05	0.826552
Eno1_K81	Eno1	K*VNVVEQEK	ENOA_MOUSE Alpha-enolase OS=Mus musculus OX=10090 GN=Eno1 PE=1 SV=3	1.05	0.862258
Naca_K142	Naca	IEDLSQQAQLAAAEK*FK	NACA_MOUSE Nascent polypeptide-associated complex subunit alpha OS=Mus musculus OX=10090 GN=Naca PE=1 SV=1	1.05	0.946178
H1-1_K179	H1-1	VAK*SPAK	H11_MOUSE Histone H1.1 OS=Mus musculus OX=10090 GN=H1-1 PE=1 SV=2	1.05	0.677171
Myh9_K1669	Myh9	EEILAQAK*ENEK	MYH9_MOUSE Myosin-9 OS=Mus musculus OX=10090 GN=Myh9 PE=1 SV=4	1.05	0.712408
Baz1b_K533	Baz1b	YELLEHK*K	BAZ1B_MOUSE Tyrosine-protein kinase BAZ1B OS=Mus musculus OX=10090 GN=Baz1b PE=1 SV=2	1.05	0.907046
Eef2_K239	Eef2	FAAK*GEGQLSAAER	EF2_MOUSE Elongation factor 2 OS=Mus musculus OX=10090 GN=Eef2 PE=1 SV=2	1.04917	0.575917
Ehd4_K471	Ehd4	ISGVNAK*K	EHD4_MOUSE EH domain-containing protein 4 OS=Mus musculus OX=10090 GN=Ehd4 PE=1 SV=1	1.049	0.772594
Rps9_K91	Rps9	IGVLDEGK*MK	RS9_MOUSE 40S ribosomal protein S9 OS=Mus musculus OX=10090 GN=Rps9 PE=1 SV=3	1.04813	0.653802
Ehd1_K468	Ehd1	ITGANAK*K	EHD1_MOUSE EH domain-containing protein 1 OS=Mus musculus OX=10090 GN=Ehd1 PE=1 SV=1	1.0475	0.636707
Wnk1_K1652	Wnk1	TLEEK*LR	WNK1_MOUSE Serine/threonine-protein kinase WNK1 OS=Mus musculus OX=10090 GN=Wnk1 PE=1 SV=2	1.0475	0.67248
Stip1_K486	Stip1	HDSPEDVK*R	STIP1_MOUSE Stress-induced-phosphoprotein 1 OS=Mus musculus OX=10090 GN=Stip1 PE=1 SV=1	1.0475	0.682211
Pum3_K622	Pum3	GGLK*PLIPTLEK	PUM3_MOUSE Pumilio homolog 3 OS=Mus musculus OX=10090 GN=Pum3 PE=1 SV=2	1.04667	0.684896
Eef1b_K185	Eef1b	LVPVGYGIK*K	EF1B_MOUSE Elongation factor 1-beta OS=Mus musculus OX=10090 GN=Eef1b PE=1 SV=5	1.04667	0.862067
Rps10_K139	Rps10	K*AEAGAGSATEFQFR	RS10_MOUSE 40S ribosomal protein S10 OS=Mus musculus OX=10090 GN=Rps10 PE=1 SV=1	1.04625	0.509571
Srrm2_K989	Srrm2	SPCPQK*SR	SRRM2_MOUSE Serine/arginine repetitive matrix protein 2 OS=Mus musculus OX=10090 GN=Srrm2 PE=1 SV=3	1.04625	0.526071
Rpl38_K57	Rpl38	LK*QSLPPGLAVK	RL38_MOUSE 60S ribosomal protein L38 OS=Mus musculus OX=10090 GN=Rpl38 PE=1 SV=3	1.04571	0.689359
Msn_K501	Msn	ADAMAK*DR	MOES_MOUSE Moesin OS=Mus musculus OX=10090 GN=Msn PE=1 SV=3	1.045	0.204736
Rdx_K400	Rdx	AAEEAK*SAIAK	RADI_MOUSE Radixin OS=Mus musculus OX=10090 GN=Rdx PE=1 SV=3	1.045	0.322801
Akr1b1_K90	Akr1b1	SMVK*GAFQK	ALDR_MOUSE Aldo-keto reductase family 1 member B1 OS=Mus musculus OX=10090 GN=Akr1b1 PE=1 SV=3	1.045	0.462589
Pfkp_K288	Pfkp	IK*ELVVK	PFKAP_MOUSE ATP-dependent 6-phosphofructokinase, platelet type OS=Mus musculus OX=10090 GN=Pfkp PE=1 SV=1	1.045	0.654329
Tardbp_K181	Tardbp	LPNSK*QSPDEPLR	TADBP_MOUSE TAR DNA-binding protein 43 OS=Mus musculus OX=10090 GN=Tardbp PE=1 SV=1	1.045	0.69003
Lars1_K417	Lars1	TK*FGIR	SYLC_MOUSE Leucine--tRNA ligase, cytoplasmic OS=Mus musculus OX=10090 GN=Lars1 PE=1 SV=2	1.045	0.69003
Hsp90b1_K135	Hsp90b1	LISLTDENALAGNEELTVK*IK	ENPL_MOUSE Endoplasmin OS=Mus musculus OX=10090 GN=Hsp90b1 PE=1 SV=2	1.045	0.69003
Ppid_K313	Ppid	K*AQGWQGLK	PPID_MOUSE Peptidyl-prolyl cis-trans isomerase D OS=Mus musculus OX=10090 GN=Ppid PE=1 SV=3	1.045	0.749189
Hsp90ab1_K531	Hsp90ab1	EFDGK*SLVSVTK	HS90B_MOUSE Heat shock protein HSP 90-beta OS=Mus musculus OX=10090 GN=Hsp90ab1 PE=1 SV=3	1.045	0.762549
Phgdh_K33	Phgdh	ILQDGGLQVVEK*QNLSK	SERA_MOUSE D-3-phosphoglycerate dehydrogenase OS=Mus musculus OX=10090 GN=Phgdh PE=1 SV=3	1.045	0.808428
Ncf2_K516	Ncf2	AFVEGCAAK*NLEGIPR	NCF2_MOUSE Neutrophil cytosol factor 2 OS=Mus musculus OX=10090 GN=Ncf2 PE=1 SV=1	1.045	0.844993
Gnl2_K603	Gnl2	ALDEK*IAK	NOG2_MOUSE Nucleolar GTP-binding protein 2 OS=Mus musculus OX=10090 GN=Gnl2 PE=1 SV=2	1.045	0.892916
Rps23_K108	Rps23	K*GHAVGDIPGVR	RS23_MOUSE 40S ribosomal protein S23 OS=Mus musculus OX=10090 GN=Rps23 PE=1 SV=3	1.045	0.91241
Pabpc1_K606	Pabpc1	SK*VDEAVAVLQAHQAK	PABP1_MOUSE Polyadenylate-binding protein 1 OS=Mus musculus OX=10090 GN=Pabpc1 PE=1 SV=2	1.04429	0.505873
Pkm_K247	Pkm	K*AADVHEVR	KPYM_MOUSE Pyruvate kinase PKM OS=Mus musculus OX=10090 GN=Pkm PE=1 SV=4	1.04375	0.698415
Hnrnpc_K198	Hnrnpc	LKGDDLQAIK*K	HNRPC_MOUSE Heterogeneous nuclear ribonucleoproteins C1/C2 OS=Mus musculus OX=10090 GN=Hnrnpc PE=1 SV=1	1.0425	0.854342
Trmt2a_K187	Trmt2a	VLQK*LAK	TRM2A_MOUSE tRNA (uracil-5-)-methyltransferase homolog A OS=Mus musculus OX=10090 GN=Trmt2a PE=1 SV=1	1.0425	0.884899
Lcp1_K542	Lcp1	SSSIASFK*DPK	PLSL_MOUSE Plastin-2 OS=Mus musculus OX=10090 GN=Lcp1 PE=1 SV=4	1.042	0.807982
Rpl29_K112	Rpl29	SYMAK*GQR	RL29_MOUSE 60S ribosomal protein L29 OS=Mus musculus OX=10090 GN=Rpl29 PE=1 SV=2	1.04167	0.724709
Rps3a_K46	Rps3a	NIGK*TLVTR	RS3A_MOUSE 40S ribosomal protein S3a OS=Mus musculus OX=10090 GN=Rps3a PE=1 SV=3	1.041	0.550291
Cltc_K764	Cltc	NFLK*EAK	CLH1_MOUSE Clathrin heavy chain 1 OS=Mus musculus OX=10090 GN=Cltc PE=1 SV=3	1.04083	0.639797
Prkaca_K293	Prkaca	NGVNDIK*NHK	KAPCA_MOUSE cAMP-dependent protein kinase catalytic subunit alpha OS=Mus musculus OX=10090 GN=Prkaca PE=1 SV=3	1.04083	0.773426
env_K144	env	LDQTTHK*SNEGFYVCPGPHRPR	ENV_MLVMS Envelope glycoprotein OS=Moloney murine leukemia virus (isolate Shinnick) OX=928306 GN=env PE=1 SV=1	1.04	0.867547
Acsl3_K679	Acsl3	FEIPLK*IR	ACSL3_MOUSE Long-chain-fatty-acid--CoA ligase 3 OS=Mus musculus OX=10090 GN=Acsl3 PE=1 SV=2	1.04
Pdia3_K75	Pdia3	LK*GIVPLAK	PDIA3_MOUSE Protein disulfide-isomerase A3 OS=Mus musculus OX=10090 GN=Pdia3 PE=1 SV=2	1.04
Gins1_K63	Gins1	GDLIPTVK*FR	PSF1_MOUSE DNA replication complex GINS protein PSF1 OS=Mus musculus OX=10090 GN=Gins1 PE=1 SV=1	1.04
Safb_K445	Safb	ATDLK*NLFSR	SAFB1_MOUSE Scaffold attachment factor B1 OS=Mus musculus OX=10090 GN=Safb PE=1 SV=2	1.04
Tln1_K911	Tln1	MATNAAAQNAIKK*	TLN1_MOUSE Talin-1 OS=Mus musculus OX=10090 GN=Tln1 PE=1 SV=2	1.04
Rpa3_K33	Rpa3	LEK*IHPTGK	RFA3_MOUSE Replication protein A 14 kDa subunit OS=Mus musculus OX=10090 GN=Rpa3 PE=1 SV=1	1.04
Hspa5_K186	Hspa5	QATK*DAGTIAGLNVMR	BIP_MOUSE Endoplasmic reticulum chaperone BiP OS=Mus musculus OX=10090 GN=Hspa5 PE=1 SV=3	1.04
Aldoa_K28	Aldoa	IVAPGK*GILAADESTGSIAK	ALDOA_MOUSE Fructose-bisphosphate aldolase A OS=Mus musculus OX=10090 GN=Aldoa PE=1 SV=2	1.04
Tnpo2_K71	Tnpo2	SLSGLILK*NNVK	TNPO2_MOUSE Transportin-2 OS=Mus musculus OX=10090 GN=Tnpo2 PE=1 SV=1	1.04
Mcl1_K39	Mcl1	LVAEEAK*AR	MCL1_MOUSE Induced myeloid leukemia cell differentiation protein Mcl-1 homolog OS=Mus musculus OX=10090 GN=Mcl1 PE=1 SV=3	1.04
Rpn1_K565	Rpn1	ELVLK*SAVEAER	RPN1_MOUSE Dolichyl-diphosphooligosaccharide--protein glycosyltransferase subunit 1 OS=Mus musculus OX=10090 GN=Rpn1 PE=1 SV=1	1.04
Acta1_K70	Acta1	GILTLK*YPIEHGIITNWDDMEK	ACTS_MOUSE Actin, alpha skeletal muscle OS=Mus musculus OX=10090 GN=Acta1 PE=1 SV=1	1.04	0.499995
[truncated: 1,155 more rows]
